# Supplementary material for: Full-length transcriptome sequencing of Arabidopsis plants provided new insights into the autophagic regulation of photosynthesis
Source: Sci Rep. 2024 Jun 25;14:14588. doi: 10.1038/s41598-024-65555-7 (PMC11199623; doi:10.1038/s41598-024-65555-7)
Supplement: Supplementary file 2 — Supplementary Table S1. [file 41598_2024_65555_MOESM2_ESM.xlsx]

## Sheet: Sheet1
Table S1 Sequencing data output statistics
Samples	Reads Number	Bases Number	N50	Mean Length	Max Length	MeanQscore
Col-0-1	5201778	6204178907	1309	1192	20865	Q13
Col-0-2	5597930	6600911984	1297	1179	15397	Q13
Col-0-3	5025632	5913457669	1295	1176	30010	Q13
atg5-1-1	5016558	5977187051	1315	1191	257481	Q13
atg5-1-2	4837535	5783291092	1321	1195	106733	Q13
atg5-1-3	5082806	6031736150	1311	1186	120868	Q13
Col-0-N-1	4522054	5702042121	1473	1260	15138	Q13
Col-0-N-2	4867715	6161957777	1470	1265	51022	Q13
Col-0-N-3	4625323	5850905821	1469	1264	31058	Q13
atg5-1-N-1	5246808	6197952877	1314	1181	95768	Q13
atg5-1-N-2	5199159	6178592366	1297	1188	16987	Q13
atg5-1-N-3	4658648	5597390587	1320	1201	32665	Q13
