# Supplementary material for: Full-length transcriptome sequencing of Arabidopsis plants provided new insights into the autophagic regulation of photosynthesis
Source: Sci Rep. 2024 Jun 25;14:14588. doi: 10.1038/s41598-024-65555-7 (PMC11199623; doi:10.1038/s41598-024-65555-7)
Supplement: Supplementary file 3 — Supplementary Table S2. [file 41598_2024_65555_MOESM3_ESM.xlsx]

## Sheet: Sheet1
Table S2 Statistical table for full-length sequences.
SampleID	Number of clean reads (except rRNA)	Number of full-length reads	Full-Length Percentage (FL%)
Col-0-1	4592098	4276349	0.9312
Col-0-2	4907245	4592078	0.9358
Col-0-3	4395493	4139611	0.9418
atg5-1-1	4419716	4133861	0.9353
atg5-1-2	4274754	3961596	0.9267
atg5-1-3	4422144	4133497	0.9347
Col-0-N-1	4155942	3873926	0.9321
Col-0-N-2	4490497	4194016	0.934
Col-0-N-3	4275087	3994621	0.9344
atg5-1-N-1	4629103	4309425	0.9309
atg5-1-N-2	4627532	4331393	0.936
atg5-1-N-3	4169638	3890232	0.933
