# Supplementary material for: Full-length transcriptome sequencing of Arabidopsis plants provided new insights into the autophagic regulation of photosynthesis
Source: Sci Rep. 2024 Jun 25;14:14588. doi: 10.1038/s41598-024-65555-7 (PMC11199623; doi:10.1038/s41598-024-65555-7)
Supplement: Supplementary file 4 — Supplementary Table S3. [file 41598_2024_65555_MOESM4_ESM.xlsx]

## Sheet: DETs identification
Table S3 DETs identification
Group	DEGs_total	DEGs_up	DEGs_down
A vs B	412	306	106
A vs C	4717	2382	2335
B vs D	73	13	60
C vs D	5797	2837	2960

## Sheet: A vs B
#ID	A1_Count	A2_Count	A3_Count	B1_Count	B2_Count	B3_Count	A1_CPM	A2_CPM	A3_CPM	B1_CPM	B2_CPM	B3_CPM	FDR	log2FC	regulated
AT1G02340.1	30	52	52	85	120	109	7.22777	11.679	12.9398	21.214	31.2318	27.202	0.000307976	1.13459	up
AT1G02610.1	187	214	198	477	455	447	45.0531	48.0635	49.2709	119.048	118.42	111.553	1.01822e-22	1.27932	up
AT1G02860.2	0	0	0	124	160	163	0	0	0	30.9475	41.6423	40.6783	2.35798e-44	4.52484	up
AT1G02930.1	935	1079	915	437	328	480	225.265	242.339	227.691	109.065	85.3668	119.789	1.21546e-17	-1.08266	down
AT1G03160.2	17	7	21	0	0	0	4.09573	1.57217	5.2257	0	0	0	0.00281821	-1.27292	down
AT1G03850.2	186	197	214	489	434	483	44.8122	44.2453	53.2523	122.043	112.955	120.537	1.59695e-21	1.30333	up
AT1G04140.1	0	0	0	121	161	201	0	0	0	30.1987	41.9026	50.1616	3.20384e-44	4.53789	up
AT1G04980.1	183	204	183	61	38	81	44.0894	45.8175	45.5382	15.2242	9.89006	20.2144	7.83629e-08	-1.36482	down
AT1G05320.3	0	0	0	46	14	45	0	0	0	11.4805	3.6437	11.2302	1.71211e-08	2.20668	up
AT1G05340.1	226	270	276	531	587	584	54.4492	60.6408	68.6806	132.525	152.775	145.743	2.26402e-20	1.21807	up
AT1G05700.1	3	2	3	15	15	24	0.722777	0.449191	0.746528	3.74364	3.90397	5.98944	0.0067613	1.26022	up
AT1G07400.1	16	24	16	62	30	117	3.85481	5.3903	3.98148	15.4737	7.80794	29.1985	0.00104584	1.34926	up
AT1G07590.1	13497	14390	13401	30635	33346	32330	3251.77	3231.93	3334.74	7645.77	8678.78	8068.27	1.12148e-164	1.33521	up
AT1G07610.1	639	637	660	1201	1390	1293	153.951	143.067	164.236	299.741	361.768	322.681	1.19099e-28	1.10142	up
AT1G09210.1	568	637	542	255	229	296	136.846	143.067	134.873	63.642	59.6006	73.8697	6.75917e-15	-1.01174	down
AT1G10070.2	0	0	0	18	25	23	0	0	0	4.49237	6.50662	5.73988	1.58677e-06	1.92325	up
AT1G11580.1	65	57	50	128	180	126	15.6602	12.802	12.4421	31.9458	46.8476	31.4446	1.27598e-06	1.27792	up
AT1G13530.1	3	3	8	24	20	25	0.722777	0.673787	1.99074	5.98983	5.20529	6.239	0.00803794	1.23956	up
AT1G13750.1	29	34	26	72	65	73	6.98684	7.63625	6.46991	17.9695	16.9172	18.2179	0.000566087	1.12545	up
AT1G15040.1	367	436	407	1206	1105	1179	88.4197	97.9237	101.279	300.989	287.592	294.231	2.41488e-70	1.61959	up
AT1G16030.1	31	20	20	203	117	422	7.46869	4.49191	4.97685	50.664	30.451	105.314	1.83569e-16	2.61762	up
AT1G17020.1	34	34	35	72	73	81	8.19147	7.63625	8.70949	17.9695	18.9993	20.2144	0.00096766	1.05344	up
AT1G17170.1	46	63	43	11	13	17	11.0826	14.1495	10.7002	2.74534	3.38344	4.24252	0.00106606	-1.27795	down
AT1G19530.1	319	458	352	864	1406	944	76.8552	102.865	87.5926	215.634	365.932	235.585	2.11366e-18	1.54135	up
AT1G19960.1	29	39	43	101	64	96	6.98684	8.75923	10.7002	25.2072	16.6569	23.9578	0.000711971	1.11399	up
AT1G20190.1	184	157	218	333	411	350	44.3303	35.2615	54.2477	83.1089	106.969	87.346	1.49437e-07	1.01371	up
AT1G21100.1	150	146	179	437	387	441	36.1388	32.791	44.5428	109.065	100.722	110.056	3.0857e-21	1.45678	up
AT1G21250.1	64	83	79	30	16	36	15.4192	18.6414	19.6586	7.48729	4.16423	8.98416	0.00443111	-1.06215	down
AT1G21310.1	801	876	849	5903	4825	5718	192.981	196.746	211.267	1473.25	1255.78	1426.98	0	2.78783	up
AT1G21400.1	578	637	634	1147	1198	1198	139.255	143.067	157.766	286.264	311.797	298.973	8.48383e-32	1.04079	up
AT1G22220.1	4	7	9	29	23	33	0.963702	1.57217	2.23958	7.23771	5.98609	8.23548	0.00359579	1.29555	up
AT1G23040.1	122	127	140	244	260	256	29.3929	28.5236	34.838	60.8966	67.6688	63.8874	1.2579e-08	1.02271	up
AT1G26250.1	6	4	5	288	336	249	1.44555	0.898383	1.24421	71.878	87.4489	62.1404	3.47325e-66	4.65493	up
AT1G27100.1	57	53	46	116	113	110	13.7328	11.9036	11.4468	28.9508	29.4099	27.4516	2.66572e-05	1.09872	up
AT1G27330.1	514	567	494	235	163	244	123.836	127.346	122.928	58.6504	42.4231	60.8926	3.66481e-13	-1.12588	down
AT1G27670.1	71	58	85	160	209	163	17.1057	13.0265	21.1516	39.9322	54.3953	40.6783	3.38652e-07	1.27045	up
AT1G29025.1	9	17	19	41	63	32	2.16833	3.81813	4.72801	10.2326	16.3967	7.98592	0.00753867	1.1641	up
AT1G29430.1	18	18	17	48	46	39	4.33666	4.04272	4.23033	11.9797	11.9722	9.73284	0.00753867	1.08145	up
AT1G29440.1	19	21	11	43	56	43	4.57759	4.71651	2.73727	10.7318	14.5748	10.7311	0.00359579	1.17127	up
AT1G29460.1	8	8	17	34	38	36	1.9274	1.79677	4.23033	8.48559	9.89006	8.98416	0.00732208	1.18674	up
AT1G33055.1	100	117	121	593	738	625	24.0926	26.2777	30.11	147.999	192.075	155.975	3.53978e-63	2.52784	up
AT1G35140.1	97	59	65	176	152	183	23.3698	13.2511	16.1748	43.9254	39.5602	45.6695	3.58707e-06	1.17513	up
AT1G43800.1	1	0	0	54	76	21	0.240926	0	0	13.4771	19.7801	5.24076	3.98199e-11	2.52231	up
AT1G44446.2	48	98	35	9	0	9	11.5644	22.0104	8.70949	2.24619	0	2.24604	2.88663e-05	-1.71552	down
AT1G45145.1	169	177	133	416	417	451	40.7164	39.7534	33.0961	103.824	108.53	112.552	1.9507e-24	1.48028	up
AT1G47395.1	1	0	1	12	18	11	0.240926	0	0.248843	2.99492	4.68476	2.74516	0.00442718	1.26311	up
AT1G51820.1	77	88	82	16	18	27	18.5513	19.7644	20.4051	3.99322	4.68476	6.73812	1.9299e-06	-1.52118	down
AT1G51980.2	47	30	57	0	0	0	11.3235	6.73787	14.184	0	0	0	1.32969e-11	-2.57234	down
AT1G52342.1	121	96	104	303	313	329	29.152	21.5612	25.8796	75.6216	81.4628	82.1052	4.39364e-20	1.57681	up
AT1G53540.1	1	0	0	103	64	220	0.240926	0	0	25.7064	16.6569	54.9032	2.81467e-25	3.65668	up
AT1G54050.1	10	10	12	55	28	95	2.40926	2.24596	2.98611	13.7267	7.28741	23.7082	2.32463e-05	1.65908	up
AT1G65310.1	133	116	248	378	757	519	32.0431	26.0531	61.713	94.3398	197.02	129.522	0.00327261	1.24601	up
AT1G65390.1	29	50	42	7	7	3	6.98684	11.2298	10.4514	1.74703	1.82185	0.74868	5.91589e-05	-1.62481	down
AT1G65490.1	92	91	60	28	31	35	22.1651	20.4382	14.9306	6.98814	8.0682	8.7346	0.00321951	-1.02315	down
AT1G65500.1	917	980	869	202	167	225	220.929	220.104	216.244	50.4144	43.4642	56.151	1.22622e-68	-2.04292	down
AT1G65610.1	17	4	14	39	40	49	4.09573	0.898383	3.4838	9.73347	10.4106	12.2284	0.00390036	1.25772	up
AT1G65970.1	2198	2528	2787	6537	10817	8524	529.554	567.778	693.525	1631.48	2815.28	2127.25	4.37617e-12	1.68446	up
AT1G73010.1	4	4	4	57	46	40	0.963702	0.898383	0.995371	14.2258	11.9722	9.9824	5.20878e-10	2.27241	up
AT1G73260.1	392	430	443	1691	1701	1680	94.4428	96.5761	110.237	422.033	442.71	419.261	2.11914e-132	2.09005	up
AT1G74100.1	499	531	441	171	138	180	120.222	119.26	109.74	42.6775	35.9165	44.9208	1.01044e-22	-1.41107	down
AT1G76930.2	33	33	32	96	78	97	7.95054	7.41166	7.96297	23.9593	20.3006	24.2073	3.03486e-06	1.34566	up
AT1G77120.1	13	8	12	119	251	140	3.13203	1.79677	2.98611	29.6996	65.3264	34.9384	1.74013e-23	3.06398	up
AT1G78290.2	18	24	26	71	79	50	4.33666	5.3903	6.46991	17.7199	20.5609	12.478	0.000217126	1.30479	up
AT1G78290.3	8	4	4	20	45	29	1.9274	0.898383	0.995371	4.99153	11.7119	7.23724	0.000704713	1.46141	up
AT1G80160.1	41	19	32	103	57	125	9.87795	4.26732	7.96297	25.7064	14.8351	31.195	0.000293746	1.31814	up
AT2G01530.1	252	270	285	626	755	756	60.7132	60.6408	70.9202	156.235	196.5	188.667	1.14624e-29	1.4727	up
AT2G01890.1	12	14	11	30	42	40	2.89111	3.14434	2.73727	7.48729	10.9311	9.9824	0.00485277	1.18959	up
AT2G02810.1	110	100	110	43	25	47	26.5018	22.4596	27.3727	10.7318	6.50662	11.7293	0.000208964	-1.14967	down
AT2G02930.1	1	3	2	13	21	23	0.240926	0.673787	0.497685	3.24449	5.46556	5.73988	0.00170627	1.39451	up
AT2G04160.1	24	21	25	65	42	69	5.78221	4.71651	6.22107	16.2225	10.9311	17.2196	0.00314108	1.11554	up
AT2G04400.1	219	235	188	80	77	98	52.7627	52.78	46.7824	19.9661	20.0404	24.4569	5.40044e-08	-1.12191	down
AT2G14247.1	0	3	1	17	43	16	0	0.673787	0.248843	4.2428	11.1914	3.99296	0.000140896	1.60336	up
AT2G14610.1	0	0	1	21	23	23	0	0	0.248843	5.2411	5.98609	5.73988	3.00699e-06	1.88669	up
AT2G15220.1	15	22	15	62	79	66	3.61388	4.9411	3.73264	15.4737	20.5609	16.471	4.72897e-07	1.65203	up
AT2G15830.1	80	99	76	169	192	158	19.274	22.235	18.912	42.1784	49.9708	39.4305	2.21664e-06	1.05396	up
AT2G16060.1	33	28	29	177	197	208	7.95054	6.28868	7.21644	44.175	51.2721	51.9085	3.16006e-28	2.49651	up
AT2G17710.1	109	101	118	240	374	266	26.2609	22.6842	29.3634	59.8983	97.339	66.383	1.05055e-10	1.40634	up
AT2G19970.1	110	117	115	48	46	44	26.5018	26.2777	28.6169	11.9797	11.9722	10.9806	0.000107034	-1.05079	down
AT2G20495.1	0	0	0	12	9	13	0	0	0	2.99492	2.34238	3.24428	0.00464106	1.21298	up
AT2G21210.1	296	290	223	99	100	121	71.314	65.1327	55.4919	24.7081	26.0265	30.1968	5.72917e-09	-1.13581	down
AT2G21620.1	67	124	99	0	0	0	16.142	27.8499	24.6354	0	0	0	1.40033e-25	-3.64351	down
AT2G22470.1	110	133	123	253	481	362	26.5018	29.8712	30.6077	63.1428	125.187	90.3407	7.13787e-12	1.54203	up
AT2G24600.2	13	24	9	0	0	0	3.13203	5.3903	2.23958	0	0	0	0.00191999	-1.31618	down
AT2G25510.1	541	684	542	1948	1470	1676	130.341	153.623	134.873	486.175	382.589	418.262	4.42017e-52	1.61117	up
AT2G26400.1	1	2	1	13	28	8	0.240926	0.449191	0.248843	3.24449	7.28741	1.99648	0.00677865	1.23257	up
AT2G27389.1	16	19	22	61	52	61	3.85481	4.26732	5.47454	15.2242	13.5338	15.2232	0.000127154	1.34034	up
AT2G28110.1	20	15	26	60	61	59	4.81851	3.36893	6.46991	14.9746	15.8761	14.724	0.000321164	1.28978	up
AT2G28860.1	22	20	14	2	2	2	5.30036	4.49191	3.4838	0.499153	0.520529	0.49912	0.00518629	-1.28468	down
AT2G29500.1	23	18	30	173	101	368	5.54129	4.04272	7.46528	43.1767	26.2867	91.8381	1.20486e-13	2.42201	up
AT2G30550.2	40	64	54	99	102	123	9.63702	14.3741	13.4375	24.7081	26.547	30.6959	0.000530043	1.00789	up
AT2G31110.2	24	31	19	71	71	75	5.78221	6.96247	4.72801	17.7199	18.4788	18.717	2.08111e-05	1.36291	up
AT2G32150.1	325	411	349	713	735	844	78.3008	92.3088	86.8461	177.948	191.295	210.629	8.34715e-24	1.1689	up
AT2G34080.1	11	10	13	33	43	41	2.65018	2.24596	3.23496	8.23602	11.1914	10.232	0.00126952	1.3085	up
AT2G37130.1	758	731	703	1918	1797	1573	182.622	164.179	174.936	478.687	467.696	392.558	1.69764e-46	1.36379	up
AT2G37750.1	336	390	410	1230	1200	1346	80.951	87.5923	102.026	306.979	312.318	335.908	1.9553e-71	1.81167	up
AT2G38530.1	2107	1888	2247	4446	4988	5210	507.63	424.037	559.15	1109.62	1298.2	1300.21	1.17174e-44	1.32037	up
AT2G38860.2	477	520	414	169	158	193	114.921	116.79	103.021	42.1784	41.1218	48.1651	1.08381e-18	-1.26794	down
AT2G38870.1	3805	4051	3612	1729	1554	1850	916.722	909.837	898.82	431.517	404.451	461.686	3.83841e-60	-1.03318	down
AT2G39730.3	118	158	94	59	42	17	28.4292	35.4861	23.3912	14.725	10.9311	4.24252	0.00159899	-1.17281	down
AT2G39805.1	0	0	0	88	77	90	0	0	0	21.9627	20.0404	22.4604	2.64974e-28	3.79052	up
AT2G39805.2	84	93	88	0	0	0	20.2377	20.8874	21.8982	0	0	0	2.89471e-26	-3.66711	down
AT2G40080.1	157	149	115	68	49	57	37.8253	33.4648	28.6169	16.9712	12.753	14.2249	0.000122719	-1.0253	down
AT2G42210.3	0	0	0	10	35	65	0	0	0	2.49576	9.10926	16.2214	4.89137e-07	1.99559	up
AT2G42540.2	2	2	2	45	9	15	0.481851	0.449191	0.497685	11.2309	2.34238	3.7434	0.00237807	1.35301	up
AT2G43150.1	25	46	39	102	110	119	6.02314	10.3314	9.70487	25.4568	28.6291	29.6976	2.09713e-07	1.45857	up
AT2G43510.1	128	136	105	598	545	596	30.8385	30.545	26.1285	149.247	141.844	148.738	2.41635e-64	2.26949	up
AT2G43620.1	3452	3730	3445	1390	1349	1481	831.675	837.742	857.263	346.911	351.097	369.598	9.94815e-100	-1.20588	down
AT2G44010.1	46	34	39	121	114	160	11.0826	7.63625	9.70487	30.1987	29.6702	39.9296	1.60495e-09	1.59319	up
AT2G44080.1	100	130	104	204	247	270	24.0926	29.1974	25.8796	50.9136	64.2854	67.3812	7.7349e-09	1.14694	up
AT2G44640.1	163	148	135	32	28	21	39.2709	33.2402	33.5938	7.98644	7.28741	5.24076	5.36332e-15	-2.01417	down
AT2G45130.1	5	5	3	55	34	43	1.20463	1.12298	0.746528	13.7267	8.849	10.7311	2.30544e-08	2.09776	up
AT2G45220.1	93	100	105	1026	652	971	22.4061	22.4596	26.1285	256.065	169.693	242.323	2.32818e-77	3.07568	up
AT2G46750.1	4	12	10	77	56	50	0.963702	2.69515	2.48843	19.2174	14.5748	12.478	1.58455e-08	2.01745	up
AT2G47270.1	37	35	41	98	98	103	8.91424	7.86085	10.2026	24.4585	25.5059	25.7047	1.86084e-06	1.31285	up
AT2G47640.1	172	207	216	0	0	0	41.4392	46.4913	53.75	0	0	0	9.10769e-51	-4.74711	down
AT2G47640.2	0	0	0	163	149	189	0	0	0	40.6809	38.7794	47.1668	9.44526e-50	4.71666	up
AT2G47760.2	31	14	20	0	0	0	7.46869	3.14434	4.97685	0	0	0	3.66287e-05	-1.68723	down
AT3G01420.1	33	33	38	99	156	111	7.95054	7.41166	9.45602	24.7081	40.6013	27.7012	8.4514e-09	1.62999	up
AT3G02040.1	164	190	175	326	357	334	39.5118	42.6732	43.5475	81.3619	92.9145	83.353	2.69423e-11	1.01904	up
AT3G02550.1	9	20	22	343	440	390	2.16833	4.49191	5.47454	85.6047	114.516	97.3284	1.90022e-71	4.06122	up
AT3G03270.2	60	48	57	140	226	171	14.4555	10.7806	14.184	34.9407	58.8198	42.6748	3.67276e-10	1.59266	up
AT3G04630.1	0	0	0	89	89	82	0	0	0	22.2123	23.1636	20.4639	7.57113e-29	3.82003	up
AT3G04630.2	101	82	65	0	0	0	24.3335	18.4168	16.1748	0	0	0	3.88877e-23	-3.48896	down
AT3G04720.1	473	567	456	1311	984	1059	113.958	127.346	113.472	327.195	256.1	264.284	8.00887e-27	1.25137	up
AT3G08860.1	3	4	5	34	19	31	0.722777	0.898383	1.24421	8.48559	4.94503	7.73636	0.000218707	1.56203	up
AT3G09220.1	18	25	31	275	186	223	4.33666	5.61489	7.71412	68.6335	48.4092	55.6519	1.34591e-32	2.87956	up
AT3G10040.1	2	2	7	95	131	107	0.481851	0.449191	1.7419	23.7097	34.0947	26.7029	2.19362e-26	3.41582	up
AT3G12500.1	38	53	47	134	163	148	9.15517	11.9036	11.6956	33.4432	42.4231	36.9349	2.05099e-11	1.60843	up
AT3G12580.1	129	122	139	226	161	475	31.0794	27.4007	34.5891	56.4042	41.9026	118.541	0.00136777	1.0466	up
AT3G12700.2	13	31	18	47	68	67	3.13203	6.96247	4.47917	11.7301	17.698	16.7205	0.000991013	1.25558	up
AT3G13310.1	197	215	214	357	432	479	47.4623	48.2881	53.2523	89.0987	112.434	119.539	9.41289e-12	1.08483	up
AT3G13435.1	40	31	24	58	80	82	9.63702	6.96247	5.97222	14.4754	20.8212	20.4639	0.00252353	1.07293	up
AT3G14060.1	19	10	11	38	46	36	4.57759	2.24596	2.73727	9.4839	11.9722	8.98416	0.00644444	1.16783	up
AT3G14680.1	6	12	11	35	32	53	1.44555	2.69515	2.73727	8.73517	8.32847	13.2267	0.000504237	1.41999	up
AT3G16150.1	28	42	41	82	126	103	6.74592	9.43302	10.2026	20.4653	32.7933	25.7047	8.53643e-06	1.34489	up
AT3G16440.1	41	33	24	56	110	64	9.87795	7.41166	5.97222	13.9763	28.6291	15.9718	0.00795375	1.04488	up
AT3G16530.1	703	893	702	203	164	212	169.371	200.564	174.688	50.664	42.6834	52.9067	1.46333e-43	-1.80343	down
AT3G17790.1	193	189	138	499	339	434	46.4986	42.4486	34.3403	124.539	88.2297	108.309	1.23652e-13	1.32475	up
AT3G19010.1	387	494	405	180	160	223	93.2382	110.95	100.781	44.9237	41.6423	55.6519	3.83557e-10	-1.02075	down
AT3G19390.1	88	80	87	160	181	192	21.2014	17.9677	21.6493	39.9322	47.1079	47.9155	5.67195e-07	1.08537	up
AT3G20940.1	28	28	34	8	7	6	6.74592	6.28868	8.46065	1.99661	1.82185	1.49736	0.00792831	-1.20696	down
AT3G21351.1	33	83	86	206	150	206	7.95054	18.6414	21.4005	51.4127	39.0397	51.4094	6.8579e-06	1.34057	up
AT3G21710.2	33	29	32	68	118	83	7.95054	6.51327	7.96297	16.9712	30.7112	20.7135	4.33067e-05	1.32766	up
AT3G21720.1	221	102	267	546	1044	573	53.2445	22.9088	66.441	136.269	271.716	142.998	0.00579752	1.23383	up
AT3G22235.1	20	18	26	106	71	101	4.81851	4.04272	6.46991	26.4551	18.4788	25.2056	3.75195e-09	1.79588	up
AT3G22240.1	86	89	76	313	272	340	20.7196	19.989	18.912	78.1174	70.792	84.8504	2.1549e-27	1.87885	up
AT3G22800.1	11	5	7	58	53	73	2.65018	1.12298	1.7419	14.4754	13.794	18.2179	6.0852e-10	2.15633	up
AT3G23030.1	371	343	442	759	775	867	89.3834	77.0363	109.988	189.428	201.705	216.368	7.30669e-17	1.12719	up
AT3G23170.1	142	135	144	360	296	406	34.2114	30.3204	35.8333	89.8475	77.0383	101.321	5.60916e-16	1.37012	up
AT3G23430.1	71	72	84	160	232	141	17.1057	16.1709	20.9028	39.9322	60.3814	35.188	6.24645e-06	1.19084	up
AT3G25230.1	295	326	313	0	0	0	71.073	73.2182	77.8878	0	0	0	4.89753e-72	-5.39254	down
AT3G25230.2	0	0	0	215	195	247	0	0	0	53.6589	50.7516	61.6413	5.81924e-61	5.08692	up
AT3G26510.4	0	0	0	11	57	13	0	0	0	2.74534	14.8351	3.24428	5.73856e-05	1.63815	up
AT3G28210.1	14	17	9	51	45	103	3.37296	3.81813	2.23958	12.7284	11.7119	25.7047	5.65135e-06	1.68795	up
AT3G29370.1	95	99	150	223	323	304	22.8879	22.235	37.3264	55.6555	84.0655	75.8662	8.60901e-08	1.27448	up
AT3G29970.1	0	0	4	12	44	13	0	0	0.995371	2.99492	11.4516	3.24428	0.00456823	1.26017	up
AT3G44300.1	56	78	47	173	160	174	13.4918	17.5185	11.6956	43.1767	41.6423	43.4234	1.67695e-10	1.45379	up
AT3G45050.4	12	44	74	0	0	0	2.89111	9.88221	18.4144	0	0	0	1.94731e-07	-2.05691	down
AT3G46230.1	5	1	4	421	243	941	1.20463	0.224596	0.995371	105.072	63.2443	234.836	1.42778e-10	2.4612	up
AT3G46900.1	64	73	63	137	152	139	15.4192	16.3955	15.6771	34.192	39.5602	34.6888	1.9391e-06	1.10704	up
AT3G47340.2	28	51	24	89	92	129	6.74592	11.4544	5.97222	22.2123	23.9443	32.1932	8.8061e-06	1.40317	up
AT3G48020.1	18	22	17	66	69	74	4.33666	4.9411	4.23033	16.472	17.9583	18.4674	5.51641e-07	1.59317	up
AT3G49120.1	234	313	270	2642	2043	2310	56.3766	70.2984	67.1875	659.381	531.721	576.484	1.22932e-192	3.14194	up
AT3G49620.1	29	38	23	6	5	9	6.98684	8.53463	5.72338	1.49746	1.30132	2.24604	0.00843571	-1.20957	down
AT3G49780.1	228	301	265	551	715	660	54.931	67.6033	65.9433	137.517	186.089	164.71	1.54577e-20	1.34537	up
AT3G50770.1	10	16	15	44	40	48	2.40926	3.59353	3.73264	10.9814	10.4106	11.9789	0.000851005	1.3016	up
AT3G50920.1	61	71	74	27	25	25	14.6965	15.9463	18.4144	6.73856	6.50662	6.239	0.00261882	-1.05676	down
AT3G52060.1	104	140	150	323	423	444	25.0563	31.4434	37.3264	80.6131	110.092	110.805	1.8173e-17	1.59632	up
AT3G53460.4	57	57	40	5	0	12	13.7328	12.802	9.95371	1.24788	0	2.99472	4.18553e-05	-1.68321	down
AT3G54040.1	22	46	34	209	176	214	5.30036	10.3314	8.46065	52.1614	45.8066	53.4058	3.35968e-23	2.35233	up
AT3G54580.1	74	57	37	101	139	113	17.8285	12.802	9.20718	25.2072	36.1768	28.2003	0.00160198	1.01079	up
AT3G54640.1	518	554	436	236	175	231	124.799	124.426	108.495	58.9	45.5463	57.6484	1.6507e-12	-1.06666	down
AT3G58490.1	3	5	3	17	16	50	0.722777	1.12298	0.746528	4.2428	4.16423	12.478	0.00143958	1.41294	up
AT3G60140.1	5	2	6	23	24	29	1.20463	0.449191	1.49306	5.74025	6.24635	7.23724	0.00144325	1.40324	up
AT3G60540.1	85	80	73	16	12	25	20.4787	17.9677	18.1655	3.99322	3.12318	6.239	1.39897e-06	-1.59774	down
AT3G61060.2	109	157	107	268	376	277	26.2609	35.2615	26.6262	66.8864	97.8595	69.1281	2.35713e-10	1.31939	up
AT3G62600.1	566	628	547	244	208	273	136.364	141.046	136.117	60.8966	54.135	68.1299	1.47241e-17	-1.10904	down
AT3G62800.1	49	51	34	0	0	0	11.8054	11.4544	8.46065	0	0	0	1.32174e-12	-2.67237	down
AT3G62800.2	0	0	0	35	43	40	0	0	0	8.73517	11.1914	9.9824	8.44572e-13	2.69416	up
AT4G01750.1	248	266	227	97	86	88	59.7495	59.7424	56.4873	24.2089	22.3828	21.9613	1.18283e-11	-1.24831	down
AT4G04460.1	14	3	16	36	68	49	3.37296	0.673787	3.98148	8.98475	17.698	12.2284	0.000754632	1.42168	up
AT4G04955.1	20	17	10	37	44	47	4.81851	3.81813	2.48843	9.23432	11.4516	11.7293	0.00792831	1.11958	up
AT4G07820.1	51	58	59	250	313	304	12.2872	13.0265	14.6817	62.3941	81.4628	75.8662	3.71348e-32	2.29146	up
AT4G10250.1	0	0	0	120	73	210	0	0	0	29.9492	18.9993	52.4076	4.71847e-30	3.93975	up
AT4G10265.1	1	1	1	83	109	90	0.240926	0.224596	0.248843	20.7148	28.3688	22.4604	4.92476e-28	3.68747	up
AT4G10270.1	7	8	5	411	466	352	1.68648	1.79677	1.24421	102.576	121.283	87.8451	4.45823e-86	4.95579	up
AT4G11650.1	24	24	14	607	426	480	5.78221	5.3903	3.4838	151.493	110.873	119.789	3.27141e-88	4.22133	up
AT4G11890.2	366	358	352	60	48	57	88.1787	80.4052	87.5926	14.9746	12.4927	14.2249	2.64946e-42	-2.41756	down
AT4G12490.1	1028	1250	1050	2927	1982	3669	247.671	280.745	261.285	730.51	515.845	915.636	2.74523e-08	1.32891	up
AT4G12550.1	1163	1127	1144	421	544	510	280.196	253.119	284.676	105.072	141.584	127.276	6.47013e-20	-1.0724	down
AT4G14130.1	357	312	553	929	1240	1555	86.0104	70.0738	137.61	231.856	322.728	388.066	8.42858e-05	1.34906	up
AT4G14365.1	204	257	205	84	63	94	49.1488	57.7211	51.0128	20.9644	16.3967	23.4586	5.8698e-09	-1.23689	down
AT4G14400.1	40	37	40	1	3	3	9.63702	8.31004	9.95371	0.249576	0.780794	0.74868	7.812e-08	-2.08289	down
AT4G14560.1	18	15	37	53	84	64	4.33666	3.36893	9.20718	13.2275	21.8622	15.9718	0.00332713	1.18346	up
AT4G14630.1	1	2	1	76	61	49	0.240926	0.449191	0.248843	18.9678	15.8761	12.2284	2.78013e-17	3.00882	up
AT4G14880.3	0	0	0	40	58	30	0	0	0	9.98305	15.0953	7.4868	1.40187e-12	2.67465	up
AT4G14880.4	29	61	49	0	0	0	6.98684	13.7003	12.1933	0	0	0	4.61327e-12	-2.62037	down
AT4G15610.1	90	126	115	245	223	256	21.6833	28.2991	28.6169	61.1462	58.039	63.8874	6.68262e-10	1.16869	up
AT4G16260.1	42	42	60	239	188	215	10.1189	9.43302	14.9306	59.6487	48.9298	53.6554	6.13661e-20	2.03581	up
AT4G18950.1	223	264	196	519	353	472	53.7264	59.2933	48.7732	129.53	91.8734	117.792	7.4643e-10	1.04107	up
AT4G19420.1	36	38	56	87	87	109	8.67332	8.53463	13.9352	21.7131	22.643	27.202	0.00121356	1.03897	up
AT4G20110.1	62	70	59	158	128	126	14.9374	15.7217	14.6817	39.4331	33.3139	31.4446	5.36209e-06	1.10667	up
AT4G21470.1	58	66	43	120	96	127	13.9737	14.8233	10.7002	29.9492	24.9854	31.6941	0.000290697	1.01775	up
AT4G21540.1	0	0	0	31	32	40	0	0	0	7.73686	8.32847	9.9824	5.78025e-11	2.50411	up
AT4G21540.2	39	33	42	0	0	0	9.3961	7.41166	10.4514	0	0	0	1.01004e-10	-2.47517	down
AT4G21680.1	62	67	51	9	16	18	14.9374	15.0479	12.691	2.24619	4.16423	4.49208	9.10118e-05	-1.43433	down
AT4G21990.1	211	308	124	75	72	66	50.8353	69.1755	30.8565	18.7182	18.7391	16.471	1.33963e-05	-1.2492	down
AT4G23170.1	194	186	189	77	42	80	46.7396	41.7748	47.0313	19.2174	10.9311	19.9648	7.88783e-07	-1.24635	down
AT4G23700.1	16	19	11	222	179	180	3.85481	4.26732	2.73727	55.4059	46.5874	44.9208	2.89022e-37	3.2068	up
AT4G24110.1	104	120	126	209	241	237	25.0563	26.9515	31.3542	52.1614	62.7238	59.1457	1.43031e-07	1.02145	up
AT4G25200.1	2	1	0	44	22	82	0.481851	0.224596	0	10.9814	5.72582	20.4639	7.12141e-10	2.3737	up
AT4G25580.1	31	24	27	113	138	179	7.46869	5.3903	6.71875	28.2021	35.9165	44.6712	3.25532e-15	2.11626	up
AT4G26288.1	25	28	10	62	66	51	6.02314	6.28868	2.48843	15.4737	17.1775	12.7276	0.00187228	1.21216	up
AT4G27450.1	385	370	420	677	941	796	92.7563	83.1004	104.514	168.963	244.909	198.65	1.01456e-13	1.1095	up
AT4G27670.1	0	0	0	25	19	32	0	0	0	6.23941	4.94503	7.98592	1.67607e-07	2.07064	up
AT4G28040.3	24	26	26	53	68	66	5.78221	5.83949	6.46991	13.2275	17.698	16.471	0.00115461	1.13751	up
AT4G28040.5	10	18	9	54	61	50	2.40926	4.04272	2.23958	13.4771	15.8761	12.478	3.86216e-06	1.65668	up
AT4G29520.1	218	235	188	90	77	88	52.5218	52.78	46.7824	22.4619	20.0404	21.9613	2.26531e-08	-1.1238	down
AT4G30290.1	36	30	60	106	184	136	8.67332	6.73787	14.9306	26.4551	47.8887	33.9402	1.14611e-06	1.51876	up
AT4G30670.1	170	166	196	413	408	429	40.9573	37.2829	48.7732	103.075	106.188	107.061	2.11366e-18	1.29184	up
AT4G31500.1	310	401	279	107	94	133	74.6869	90.0629	69.4271	26.7047	24.4649	33.1915	1.06814e-12	-1.34739	down
AT4G31530.2	0	0	0	169	168	71	0	0	0	42.1784	43.7245	17.7188	1.47376e-31	4.01355	up
AT4G31875.1	28	31	36	91	123	78	6.74592	6.96247	8.95834	22.7114	32.0126	19.4657	2.87082e-06	1.43477	up
AT4G32480.1	537	595	595	1276	1251	1393	129.377	133.634	148.061	318.459	325.591	347.637	1.03211e-47	1.28027	up
AT4G33070.1	5	7	5	48	152	67	1.20463	1.57217	1.24421	11.9797	39.5602	16.7205	3.37638e-12	2.51672	up
AT4G33560.1	6	1	3	53	94	63	1.44555	0.224596	0.746528	13.2275	24.4649	15.7223	2.33818e-14	2.7137	up
AT4G35770.2	4739	5213	5085	9375	9086	9467	1141.75	1170.82	1265.37	2339.78	2364.76	2362.58	2.25969e-99	1.00671	up
AT4G36430.1	71	70	68	26	21	32	17.1057	15.7217	16.9213	6.48898	5.46556	7.98592	0.00325841	-1.04359	down
AT4G37010.2	17	23	11	68	84	60	4.09573	5.1657	2.73727	16.9712	21.8622	14.9736	7.52638e-07	1.669	up
AT4G37070.2	39	50	51	95	102	109	9.3961	11.2298	12.691	23.7097	26.547	27.202	0.000111136	1.0873	up
AT4G37520.1	180	219	224	704	500	731	43.3666	49.1864	55.7408	175.702	130.132	182.428	3.42264e-26	1.66432	up
AT4G37870.1	1330	1340	1417	2630	2774	2545	320.431	300.958	352.61	656.386	721.974	635.13	1.76134e-41	1.06403	up
AT4G38825.1	56	60	87	150	148	141	13.4918	13.4757	21.6493	37.4364	38.5192	35.188	3.4678e-05	1.08707	up
AT4G39675.1	243	293	299	753	1437	899	58.5449	65.8065	74.404	187.931	374	224.354	3.48696e-08	1.65466	up
AT4G39850.3	36	29	33	0	0	0	8.67332	6.51327	8.21181	0	0	0	4.25767e-09	-2.285	down
AT4G39940.1	256	289	222	74	89	108	61.6769	64.9081	55.2431	18.4686	23.1636	26.9525	3.0126e-10	-1.2753	down
AT4G39950.1	401	448	365	152	148	193	96.6111	100.619	90.8276	37.9356	38.5192	48.1651	9.3172e-13	-1.12631	down
AT5G02020.1	56	64	61	143	154	126	13.4918	14.3741	15.1794	35.6894	40.0808	31.4446	4.30902e-07	1.21017	up
AT5G02090.1	54	65	73	146	201	201	13.01	14.5987	18.1655	36.4381	52.3132	50.1616	7.12141e-10	1.45933	up
AT5G03160.1	284	308	264	96	97	117	68.4229	69.1755	65.6945	23.9593	25.2457	29.1985	5.44128e-13	-1.26848	down
AT5G03545.1	119	140	106	467	547	355	28.6701	31.4434	26.3773	116.552	142.365	88.5938	2.18647e-24	1.89208	up
AT5G04940.2	0	0	0	15	9	14	0	0	0	3.74364	2.34238	3.49384	0.0020863	1.30403	up
AT5G04950.1	144	194	113	24	30	23	34.6933	43.5716	28.1192	5.98983	7.80794	5.73988	6.53178e-14	-2.03763	down
AT5G07010.1	30	26	43	70	83	79	7.22777	5.83949	10.7002	17.4703	21.602	19.7152	0.00146685	1.09226	up
AT5G07340.2	0	0	0	89	96	53	0	0	0	22.2123	24.9854	13.2267	2.65888e-23	3.51522	up
AT5G07460.1	88	105	102	233	208	230	21.2014	23.5825	25.382	58.1513	54.135	57.3988	6.18121e-11	1.22096	up
AT5G08760.1	424	434	405	141	141	170	102.152	97.4745	100.781	35.1903	36.6973	42.4252	6.39235e-19	-1.30827	down
AT5G10040.1	1	1	0	10	38	7	0.240926	0.224596	0	2.49576	9.89006	1.74692	0.00389288	1.26046	up
AT5G10695.1	49	28	21	91	65	122	11.8054	6.28868	5.2257	22.7114	16.9172	30.4463	0.000562818	1.24886	up
AT5G12020.1	8	5	4	281	204	591	1.9274	1.12298	0.995371	70.1309	53.094	147.49	6.75312e-19	3.21136	up
AT5G12030.1	16	12	14	271	110	566	3.85481	2.69515	3.4838	67.6352	28.6291	141.251	7.63272e-08	2.12074	up
AT5G13080.1	19	21	16	45	45	53	4.57759	4.71651	3.98148	11.2309	11.7119	13.2267	0.00393067	1.1193	up
AT5G15120.1	4	6	5	70	86	90	0.963702	1.34757	1.24421	17.4703	22.3828	22.4604	6.40656e-19	2.89819	up
AT5G17170.1	0	0	0	320	233	255	0	0	0	79.8644	60.6417	63.6378	1.26268e-68	5.32618	up
AT5G17170.2	345	354	276	0	0	0	83.1193	79.5069	68.6806	0	0	0	1.72967e-72	-5.41624	down
AT5G17290.1	103	115	102	0	3	1	24.8153	25.8285	25.382	0	0.780794	0.24956	4.61797e-28	-3.63956	down
AT5G17330.1	190	216	226	458	475	514	45.7759	48.5127	56.2384	114.306	123.626	128.274	2.09723e-20	1.26596	up
AT5G17820.1	91	99	103	187	250	205	21.9242	22.235	25.6308	46.6708	65.0662	51.1598	5.93781e-08	1.15279	up
AT5G20150.1	124	170	149	345	316	333	29.8748	38.1813	37.0776	86.1038	82.2436	83.1035	2.39731e-14	1.22498	up
AT5G20790.1	34	37	33	133	89	110	8.19147	8.31004	8.21181	33.1936	23.1636	27.4516	2.42772e-08	1.53213	up
AT5G22500.1	249	128	246	348	506	520	59.9905	28.7482	61.2153	86.8525	131.694	129.771	1.93942e-05	1.10711	up
AT5G23020.1	23	18	28	69	54	68	5.54129	4.04272	6.9676	17.2208	14.0543	16.9701	0.000433474	1.24023	up
AT5G23840.1	78	68	30	16	18	9	18.7922	15.2725	7.46528	3.99322	4.68476	2.24604	0.00228523	-1.27811	down
AT5G24110.1	33	26	32	2	3	1	7.95054	5.83949	7.96297	0.499153	0.780794	0.24956	8.77019e-06	-1.81145	down
AT5G24240.1	0	0	1	83	79	93	0	0	0.248843	20.7148	20.5609	23.2091	1.76757e-27	3.71304	up
AT5G24530.1	49	62	48	134	107	115	11.8054	13.9249	11.9444	33.4432	27.8483	28.6994	1.18405e-05	1.138	up
AT5G25190.1	22	22	33	51	57	69	5.30036	4.9411	8.21181	12.7284	14.8351	17.2196	0.0082422	1.02418	up
AT5G26280.1	574	561	546	1208	1096	1187	138.291	125.998	135.868	301.488	285.25	296.228	3.69149e-40	1.15406	up
AT5G26690.1	2	4	1	18	14	24	0.481851	0.898383	0.248843	4.49237	3.6437	5.98944	0.0036182	1.32175	up
AT5G28020.6	0	0	0	30	18	45	0	0	0	7.48729	4.68476	11.2302	1.77023e-08	2.20552	up
AT5G28540.1	739	839	606	246	189	303	178.044	188.436	150.799	61.3958	49.19	75.6167	5.82898e-18	-1.37491	down
AT5G36170.2	0	0	0	97	84	116	0	0	0	24.2089	21.8622	28.949	1.18348e-31	3.96793	up
AT5G37780.2	61	431	216	0	0	0	14.6965	96.8007	53.75	0	0	0	0.000522534	-1.41587	down
AT5G38940.1	16	20	11	52	43	57	3.85481	4.49191	2.73727	12.978	11.1914	14.2249	0.000324942	1.34488	up
AT5G39520.1	5	15	12	128	95	88	1.20463	3.36893	2.98611	31.9458	24.7251	21.9613	1.69287e-16	2.57418	up
AT5G39890.1	7	9	12	34	49	36	1.68648	2.02136	2.98611	8.48559	12.753	8.98416	0.000292923	1.4575	up
AT5G40690.1	30	35	36	95	102	86	7.22777	7.86085	8.95834	23.7097	26.547	21.4622	1.59871e-06	1.36792	up
AT5G42020.1	643	771	619	249	222	297	154.915	173.163	154.034	62.1445	57.7788	74.1193	3.18153e-21	-1.24158	down
AT5G42600.1	73	99	100	32	34	34	17.5876	22.235	24.8843	7.98644	8.849	8.48504	0.000413834	-1.11243	down
AT5G43290.1	99	100	94	32	42	41	23.8516	22.4596	23.3912	7.98644	10.9311	10.232	0.000434202	-1.05577	down
AT5G43350.1	160	181	158	1098	742	1017	38.5481	40.6518	39.3171	274.035	193.116	253.802	7.35479e-70	2.52262	up
AT5G43580.1	208	242	239	2001	1444	1740	50.1125	54.3521	59.4734	499.402	375.822	434.234	2.39727e-135	2.93912	up
AT5G44260.1	419	437	459	863	875	884	100.948	98.1483	114.219	215.384	227.732	220.611	2.57347e-27	1.09126	up
AT5G44380.1	134	175	131	266	300	284	32.284	39.3042	32.5984	66.3873	78.0794	70.875	7.32447e-09	1.01656	up
AT5G44568.1	473	496	472	163	121	120	113.958	111.399	117.454	40.6809	31.492	29.9472	1.00239e-26	-1.63776	down
AT5G44575.1	769	811	710	195	185	224	185.272	182.147	176.678	48.6674	48.149	55.9014	1.00433e-50	-1.75406	down
AT5G44578.1	138	163	156	37	59	45	33.2477	36.6091	38.8195	9.23432	15.3556	11.2302	6.33542e-08	-1.38433	down
AT5G44585.1	1510	1525	1455	669	618	595	363.798	342.508	362.066	166.967	160.844	148.488	6.22185e-41	-1.12088	down
AT5G44610.1	133	132	119	323	445	355	32.0431	29.6466	29.6123	80.6131	115.818	88.5938	1.25072e-18	1.56736	up
AT5G44920.1	17	21	22	40	73	53	4.09573	4.71651	5.47454	9.98305	18.9993	13.2267	0.00244387	1.184	up
AT5G48290.1	7	1	3	26	19	22	1.68648	0.224596	0.746528	6.48898	4.94503	5.49032	0.00603496	1.2726	up
AT5G49690.1	35	29	37	97	104	108	8.43239	6.51327	9.20718	24.2089	27.0675	26.9525	8.23635e-08	1.47887	up
AT5G50260.1	7	6	11	60	113	85	1.68648	1.34757	2.73727	14.9746	29.4099	21.2126	1.13377e-13	2.49207	up
AT5G50560.1	67	61	61	145	124	153	16.142	13.7003	15.1794	36.1886	32.2728	38.1827	1.33157e-06	1.1506	up
AT5G50760.1	4	7	10	28	27	35	0.963702	1.57217	2.48843	6.98814	7.02715	8.7346	0.00253749	1.32365	up
AT5G53870.1	6	8	8	19	33	32	1.44555	1.79677	1.99074	4.74195	8.58873	7.98592	0.0077103	1.21883	up
AT5G54860.1	59	58	69	19	18	26	14.2146	13.0265	17.1701	4.74195	4.68476	6.48856	0.00233527	-1.12897	down
AT5G55450.1	127	133	81	43	44	25	30.5975	29.8712	20.1563	10.7318	11.4516	6.239	0.0001525	-1.2184	down
AT5G55970.2	38	41	47	83	109	90	9.15517	9.20842	11.6956	20.7148	28.3688	22.4604	0.000307976	1.09321	up
AT5G56870.1	161	205	167	396	372	367	38.789	46.0421	41.5567	98.8322	96.8184	91.5885	1.77234e-15	1.16396	up
AT5G57560.1	133	144	139	398	285	398	32.0431	32.3418	34.5891	99.3314	74.1754	99.3249	3.15891e-16	1.40845	up
AT5G59320.1	11	5	7	32	43	28	2.65018	1.12298	1.7419	7.98644	11.1914	6.98768	0.000974847	1.3986	up
AT5G59720.1	20	16	8	553	472	1058	4.81851	3.59353	1.99074	138.016	122.845	264.034	5.07902e-26	3.60025	up
AT5G61160.1	19	26	13	4	0	1	4.57759	5.83949	3.23496	0.998305	0	0.24956	0.00795375	-1.22757	down
AT5G61240.2	0	0	0	42	70	19	0	0	0	10.4822	18.2185	4.74164	3.40645e-10	2.41881	up
AT5G61790.1	831	864	719	345	328	375	200.209	194.051	178.918	86.1038	85.3668	93.585	3.39353e-22	-1.0595	down
AT5G62280.1	68	71	84	176	193	242	16.3829	15.9463	20.9028	43.9254	50.2311	60.3935	8.60502e-11	1.42658	up
AT5G62360.1	316	392	250	158	123	127	76.1325	88.0415	62.2107	39.4331	32.0126	31.6941	2.0915e-07	-1.0318	down
AT5G62520.1	27	13	22	59	68	77	6.50499	2.91974	5.47454	14.725	17.698	19.2161	7.28756e-05	1.39937	up
AT5G63600.2	39	51	19	200	181	227	9.3961	11.4544	4.72801	49.9153	47.1079	56.6501	5.47494e-19	2.24969	up
AT5G64100.1	316	387	384	2234	1757	2185	76.1325	86.9185	95.5556	557.553	457.285	545.289	5.31733e-132	2.56345	up
AT5G64110.1	21	19	24	333	197	300	5.05944	4.26732	5.97222	83.1089	51.2721	74.868	3.21556e-41	3.276	up
AT5G65207.1	692	725	758	1464	1540	1403	166.72	162.832	188.623	365.38	400.808	350.133	8.23803e-35	1.11858	up
AT5G66170.3	121	128	118	312	433	327	29.152	28.7482	29.3634	77.8678	112.695	81.6061	1.80824e-17	1.55996	up
AT5G67060.1	33	40	58	91	102	98	7.95054	8.98383	14.4329	22.7114	26.547	24.4569	0.000809137	1.06572	up
ONT.10079.2	2	8	2	39	16	33	0.481851	1.79677	0.497685	9.73347	4.16423	8.23548	0.000749719	1.46963	up
ONT.10084.2	50	135	119	9	27	44	12.0463	30.3204	29.6123	2.24619	7.02715	10.9806	0.00557354	-1.20148	down
ONT.10098.2	0	0	1	27	32	22	0	0	0.248843	6.73856	8.32847	5.49032	1.23076e-07	2.09322	up
ONT.10573.2	48	76	48	135	108	121	11.5644	17.0693	11.9444	33.6928	28.1086	30.1968	0.000121987	1.06004	up
ONT.10591.3	27	15	6	0	0	0	6.50499	3.36893	1.49306	0	0	0	0.00318311	-1.25726	down
ONT.1088.1	1	1	1	21	13	20	0.240926	0.224596	0.248843	5.2411	3.38344	4.9912	0.000382357	1.51988	up
ONT.11044.2	33	29	16	57	75	81	7.95054	6.51327	3.98148	14.2258	19.5198	20.2144	0.000548933	1.23127	up
ONT.11213.1	87	107	100	185	244	230	20.9605	24.0317	24.8843	46.1716	63.5046	57.3988	9.93262e-09	1.18782	up
ONT.11259.4	6	17	37	122	92	133	1.44555	3.81813	9.20718	30.4483	23.9443	33.1915	2.01069e-07	1.86134	up
ONT.11311.3	12	29	21	1	0	1	2.89111	6.51327	5.2257	0.249576	0	0.24956	0.000353831	-1.51864	down
ONT.11881.1	57	70	63	216	178	172	13.7328	15.7217	15.6771	53.9085	46.3271	42.9243	3.94212e-13	1.54622	up
ONT.12092.2	55	56	60	0	0	0	13.2509	12.5774	14.9306	0	0	0	6.44441e-17	-3.04817	down
ONT.12092.3	0	0	0	37	53	50	0	0	0	9.23432	13.794	12.478	5.71873e-15	2.89361	up
ONT.12437.2	46	52	38	9	17	16	11.0826	11.679	9.45602	2.24619	4.4245	3.99296	0.00934766	-1.11054	down
ONT.12849.3	124	163	199	435	451	494	29.8748	36.6091	49.5197	108.566	117.379	123.283	1.75275e-18	1.52631	up
ONT.13193.3	26	49	31	117	114	151	6.26406	11.0052	7.71412	29.2004	29.6702	37.6836	9.20311e-10	1.67952	up
ONT.13319.2	26	36	28	79	92	76	6.26406	8.08544	6.9676	19.7165	23.9443	18.9666	1.67508e-05	1.31665	up
ONT.13833.1	22	31	35	63	70	76	5.30036	6.96247	8.70949	15.7233	18.2185	18.9666	0.00128728	1.10873	up
ONT.14228.1	70	89	80	24	24	26	16.8648	19.989	19.9074	5.98983	6.24635	6.48856	4.75411e-05	-1.29084	down
ONT.14264.4	152	200	162	376	362	388	36.6207	44.9191	40.3125	93.8407	94.2158	96.8293	3.90863e-16	1.20195	up
ONT.14787.3	22	51	39	104	83	148	5.30036	11.4544	9.70487	25.9559	21.602	36.9349	2.49325e-05	1.37316	up
ONT.14846.1	52	54	60	127	113	116	12.5281	12.1282	14.9306	31.6962	29.4099	28.949	2.50941e-05	1.08417	up
ONT.15399.1	3	4	3	43	31	41	0.722777	0.898383	0.746528	10.7318	8.0682	10.232	4.97496e-08	2.08417	up
ONT.1550.3	244	280	184	103	71	113	58.7858	62.8868	45.7871	25.7064	18.4788	28.2003	4.30115e-06	-1.07336	down
ONT.15790.3	76	59	78	157	140	155	18.3103	13.2511	19.4097	39.1835	36.437	38.6818	8.70085e-06	1.07996	up
ONT.16172.11	86	72	92	271	263	234	20.7196	16.1709	22.8935	67.6352	68.4496	58.397	1.36744e-16	1.60595	up
ONT.16172.7	234	263	236	635	581	587	56.3766	59.0687	58.7269	158.481	151.214	146.492	1.34929e-32	1.38058	up
ONT.16310.2	105	129	100	50	39	38	25.2972	28.9728	24.8843	12.4788	10.1503	9.48328	9.42638e-05	-1.10606	down
ONT.16595.1	29	24	25	79	70	55	6.98684	5.3903	6.22107	19.7165	18.2185	13.7258	0.000431646	1.20607	up
ONT.17169.2	24	26	2	68	107	57	5.78221	5.83949	0.497685	16.9712	27.8483	14.2249	0.000936232	1.40782	up
ONT.17205.1	4	4	3	82	141	99	0.963702	0.898383	0.746528	20.4653	36.6973	24.7064	1.70779e-24	3.33444	up
ONT.17856.2	0	0	0	12	9	19	0	0	0	2.99492	2.34238	4.74164	0.00172529	1.32427	up
ONT.17856.3	0	0	0	52	61	49	0	0	0	12.978	15.8761	12.2284	7.19374e-18	3.12792	up
ONT.17856.4	0	0	1	15	19	19	0	0	0.248843	3.74364	4.94503	4.74164	0.000120117	1.60179	up
ONT.18311.1	72	81	87	6	6	5	17.3466	18.1922	21.6493	1.49746	1.56159	1.2478	3.39265e-15	-2.60211	down
ONT.18324.1	419	393	398	175	129	181	100.948	88.2661	99.0394	43.6758	33.5741	45.1704	4.10561e-12	-1.14506	down
ONT.18324.3	39	46	38	0	4	4	9.3961	10.3314	9.45602	0	1.04106	0.99824	2.36591e-07	-2.02132	down
ONT.18327.2	316	319	285	109	78	106	76.1325	71.646	70.9202	27.2038	20.3006	26.4534	1.02218e-15	-1.43941	down
ONT.18406.1	13	21	18	177	60	162	3.13203	4.71651	4.47917	44.175	15.6159	40.4287	1.11485e-11	2.24801	up
ONT.18529.2	8	8	8	56	39	43	1.9274	1.79677	1.99074	13.9763	10.1503	10.7311	1.39693e-06	1.7887	up
ONT.18856.2	62	75	60	10	10	14	14.9374	16.8447	14.9306	2.49576	2.60265	3.49384	1.28523e-07	-1.7968	down
ONT.1889.1	1	0	0	11	20	8	0.240926	0	0	2.74534	5.20529	1.99648	0.0059332	1.20645	up
ONT.18935.1	85	94	75	34	43	21	20.4787	21.112	18.6632	8.48559	11.1914	5.24076	0.00491037	-1.01129	down
ONT.19061.2	8	9	14	36	22	47	1.9274	2.02136	3.4838	8.98475	5.72582	11.7293	0.00955111	1.1763	up
ONT.19094.4	39	26	41	6	12	8	9.3961	5.83949	10.2026	1.49746	3.12318	1.99648	0.00905362	-1.18743	down
ONT.19262.3	34	47	42	91	107	69	8.19147	10.556	10.4514	22.7114	27.8483	17.2196	0.00150467	1.03952	up
ONT.19309.3	3	3	5	27	20	37	0.722777	0.673787	1.24421	6.73856	5.20529	9.23372	0.000154418	1.59261	up
ONT.1968.1	150	184	174	53	44	61	36.1388	41.3256	43.2986	13.2275	11.4516	15.2232	1.2833e-09	-1.40918	down
ONT.1972.1	210	180	170	70	65	67	50.5944	40.4272	42.3033	17.4703	16.9172	16.7205	2.0765e-08	-1.23645	down
ONT.2000.1	45	46	41	7	2	14	10.8416	10.3314	10.2026	1.74703	0.520529	3.49384	0.000548933	-1.4542	down
ONT.2269.2	127	168	166	63	62	52	30.5975	37.7321	41.3079	15.7233	16.1364	12.9771	6.75182e-06	-1.12732	down
ONT.2771.1	76	104	84	29	27	24	18.3103	23.3579	20.9028	7.23771	7.02715	5.98944	1.65791e-05	-1.32629	down
ONT.3433.2	34	41	36	251	191	209	8.19147	9.20842	8.95834	62.6436	49.7105	52.158	2.17964e-28	2.40107	up
ONT.3526.2	180	264	210	51	90	86	43.3666	59.2933	52.257	12.7284	23.4238	21.4622	8.65437e-07	-1.24276	down
ONT.366.4	42	56	62	128	128	123	10.1189	12.5774	15.4282	31.9458	33.3139	30.6959	3.05258e-06	1.20511	up
ONT.366.6	70	82	95	169	213	186	16.8648	18.4168	23.6401	42.1784	55.4364	46.4182	1.03275e-07	1.20126	up
ONT.3828.1	3	5	1	42	53	37	0.722777	1.12298	0.248843	10.4822	13.794	9.23372	2.14584e-09	2.25513	up
ONT.3842.1	4	4	1	29	12	33	0.963702	0.898383	0.248843	7.23771	3.12318	8.23548	0.00121421	1.42818	up
ONT.409.3	24	31	49	103	71	77	5.78221	6.96247	12.1933	25.7064	18.4788	19.2161	0.002179	1.10111	up
ONT.4143.1	1	2	3	33	20	20	0.240926	0.449191	0.746528	8.23602	5.20529	4.9912	7.82974e-05	1.65755	up
ONT.4144.1	3	2	1	17	20	15	0.722777	0.449191	0.248843	4.2428	5.20529	3.7434	0.0034552	1.32498	up
ONT.4222.1	1	2	1	16	27	12	0.240926	0.449191	0.248843	3.99322	7.02715	2.99472	0.00110471	1.42529	up
ONT.4280.2	9	19	32	46	59	79	2.16833	4.26732	7.96297	11.4805	15.3556	19.7152	0.0043926	1.19806	up
ONT.4518.3	20	37	29	65	130	95	4.81851	8.31004	7.21644	16.2225	33.8344	23.7082	1.0481e-05	1.47738	up
ONT.4951.1	5284	6044	5515	19846	16417	18697	1273.05	1357.46	1372.37	4953.09	4272.76	4666.02	1.55238e-212	1.81178	up
ONT.4968.2	28	23	17	46	66	76	6.74592	5.1657	4.23033	11.4805	17.1775	18.9666	0.000991013	1.21746	up
ONT.5145.1	12	11	8	218	248	249	2.89111	2.47055	1.99074	54.4076	64.5456	62.1404	2.72878e-54	3.89291	up
ONT.5264.1	0	0	0	6	24	28	0	0	0	1.49746	6.24635	6.98768	0.000296381	1.49763	up
ONT.5695.6	172	182	170	39	32	47	41.4392	40.8764	42.3033	9.73347	8.32847	11.7293	3.8257e-15	-1.8146	down
ONT.5749.1	109	163	121	221	281	287	26.2609	36.6091	30.11	55.1564	73.1344	71.6237	3.21948e-07	1.05016	up
ONT.5770.2	1	2	2	15	10	29	0.240926	0.449191	0.497685	3.74364	2.60265	7.23724	0.00354576	1.31353	up
ONT.6847.2	1	1	1	16	11	20	0.240926	0.224596	0.248843	3.99322	2.86291	4.9912	0.0018893	1.36756	up
ONT.6942.1	238	244	200	91	52	107	57.3403	54.8013	49.7685	22.7114	13.5338	26.7029	1.58677e-06	-1.19058	down
ONT.7346.3	65	68	68	142	134	157	15.6602	15.2725	16.9213	35.4398	34.8755	39.1809	1.40144e-06	1.1133	up
ONT.7377.1	2	0	0	22	10	26	0.481851	0	0	5.49068	2.60265	6.48856	0.000469204	1.48609	up
ONT.749.2	2	8	7	25	25	32	0.481851	1.79677	1.7419	6.23941	6.50662	7.98592	0.00306187	1.32669	up
ONT.7618.1	1	4	0	19	25	17	0.240926	0.898383	0	4.74195	6.50662	4.24252	0.000920708	1.44624	up
ONT.7977.1	0	0	2	9	25	14	0	0	0.497685	2.24619	6.50662	3.49384	0.00370245	1.27503	up
ONT.8086.2	13	33	21	0	0	5	3.13203	7.41166	5.2257	0	0	1.2478	0.00905362	-1.20311	down
ONT.8469.1	16	16	10	52	47	31	3.85481	3.59353	2.48843	12.978	12.2324	7.73636	0.00301592	1.22558	up
ONT.849.2	56	63	35	131	106	103	13.4918	14.1495	8.70949	32.6945	27.5881	25.7047	0.000186886	1.09316	up
ONT.849.3	39	29	38	84	77	100	9.3961	6.51327	9.45602	20.9644	20.0404	24.956	0.00013309	1.18402	up
ONT.85.6	29	29	30	95	70	87	6.98684	6.51327	7.46528	23.7097	18.2185	21.7117	6.18951e-06	1.3627	up
ONT.85.8	14	10	6	72	39	45	3.37296	2.24596	1.49306	17.9695	10.1503	11.2302	1.12379e-05	1.67304	up
ONT.8898.1	56	44	73	162	154	151	13.4918	9.88221	18.1655	40.4314	40.0808	37.6836	7.812e-08	1.36133	up
ONT.9097.1	76	78	74	162	155	160	18.3103	17.5185	18.4144	40.4314	40.341	39.9296	4.72897e-07	1.08881	up
ONT.9155.6	5	12	9	25	34	36	1.20463	2.69515	2.23958	6.23941	8.849	8.98416	0.00518633	1.24113	up
ONT.9257.1	26	39	42	0	0	4	6.26406	8.75923	10.4514	0	0	0.99824	1.12519e-06	-1.95577	down
ONT.9270.1	67	67	85	223	238	259	16.142	15.0479	21.1516	55.6555	61.943	64.636	1.80824e-17	1.6892	up
ONT.9276.3	1	3	0	33	98	35	0.240926	0.673787	0	8.23602	25.5059	8.7346	3.61204e-10	2.40545	up
ONT.9279.3	1	3	8	428	465	437	0.240926	0.673787	1.99074	106.819	121.023	109.058	5.59029e-98	5.42317	up
ONT.9279.4	0	0	0	16	29	15	0	0	0	3.99322	7.54767	3.7434	1.96472e-05	1.73483	up
ONT.9465.1	3	2	5	67	49	62	0.722777	0.449191	1.24421	16.7216	12.753	15.4727	7.16261e-14	2.64067	up
ONT.9471.2	36	11	21	66	51	78	8.67332	2.47055	5.2257	16.472	13.2735	19.4657	0.00510641	1.15901	up
ONT.9490.3	167	188	182	534	637	558	40.2346	42.224	45.2894	133.274	165.789	139.254	1.28468e-36	1.73918	up
ONT.9615.2	18	23	16	40	67	48	4.33666	5.1657	3.98148	9.98305	17.4377	11.9789	0.00321951	1.1651	up
ONT.9711.3	20	17	23	1	4	0	4.81851	3.81813	5.72338	0.249576	1.04106	0	0.0046685	-1.2871	down

## Sheet: A vs C
#ID	A1_Count	A2_Count	A3_Count	C1_Count	C2_Count	C3_Count	A1_CPM	A2_CPM	A3_CPM	C1_CPM	C2_CPM	C3_CPM	FDR	log2FC	regulated
AT1G01170.1	1599	1586	1575	575	644	544	385.24	356.209	391.927	152.965	157.943	140.123	1.21513e-95	-1.70761	down
AT1G01320.2	231	259	179	139	106	114	55.6538	58.1703	44.5428	36.9777	25.9968	29.364	9.74301e-08	-1.15341	down
AT1G01360.1	61	65	56	149	158	170	14.6965	14.5987	13.9352	39.638	38.75	43.7884	1.79772e-06	1.10603	up
AT1G01420.1	7	13	7	27	48	30	1.68648	2.91974	1.7419	7.18273	11.7721	7.72736	0.0066436	1.58693	up
AT1G01453.1	0	0	0	24	16	26	0	0	0	6.38464	3.92405	6.69705	4.00326e-06	4.75035	up
AT1G01600.1	5	8	6	31	31	31	1.20463	1.79677	1.49306	8.24683	7.60284	7.98494	0.00125889	1.89555	up
AT1G01620.1	1964	2102	2063	773	767	705	473.178	472.1	513.362	205.639	188.109	181.593	1.03809e-119	-1.72154	down
AT1G01660.1	3	1	1	14	17	21	0.722777	0.224596	0.248843	3.72438	4.1693	5.40915	0.00239989	2.62512	up
AT1G01720.1	133	152	123	64	81	91	32.0431	34.1385	30.6077	17.0257	19.8655	23.4397	1.15663e-05	-1.05139	down
AT1G01750.1	9	9	5	92	132	141	2.16833	2.02136	1.24421	24.4745	32.3734	36.3186	4.46092e-18	3.57901	up
AT1G02150.1	327	379	366	133	145	142	78.7827	85.1218	91.0764	35.3816	35.5617	36.5762	2.4424e-28	-1.61894	down
AT1G02205.2	13	6	9	28	42	36	3.13203	1.34757	2.23958	7.44875	10.3006	9.27284	0.00715591	1.54169	up
AT1G02360.1	79	76	59	193	212	241	19.0331	17.0693	14.6817	51.3432	51.9936	62.0765	3.18362e-09	1.30877	up
AT1G02390.1	0	0	0	8	12	6	0	0	0	2.12821	2.94304	1.54547	0.00310822	3.48562	up
AT1G02450.1	15	18	14	37	62	59	3.61388	4.04272	3.4838	9.84299	15.2057	15.1971	0.00188002	1.41934	up
AT1G02475.1	357	380	303	187	193	189	86.0104	85.3463	75.3993	49.747	47.3338	48.6824	3.99714e-15	-1.1374	down
AT1G02570.1	3	3	2	24	18	17	0.722777	0.673787	0.497685	6.38464	4.41455	4.37884	0.00288953	2.31343	up
AT1G02610.1	187	214	198	49	54	48	45.0531	48.0635	49.2709	13.0353	13.2437	12.3638	5.09763e-27	-2.24194	down
AT1G02640.1	67	79	75	31	44	27	16.142	17.7431	18.6632	8.24683	10.7911	6.95463	4.12591e-05	-1.36584	down
AT1G02660.1	201	212	193	50	63	55	48.426	47.6143	48.0266	13.3013	15.4509	14.1668	5.29116e-25	-2.10842	down
AT1G02810.1	8	10	9	42	45	53	1.9274	2.24596	2.23958	11.1731	11.0364	13.6517	3.62122e-05	2.00875	up
AT1G02820.1	19	36	17	1	1	2	4.57759	8.08544	4.23033	0.266027	0.245253	0.515158	1.9406e-06	-3.77482	down
AT1G02860.2	0	0	0	126	133	126	0	0	0	33.5194	32.6186	32.4549	1.06484e-16	7.06355	up
AT1G02880.3	17	29	33	62	76	91	4.09573	6.51327	8.21181	16.4937	18.6392	23.4397	0.0022597	1.22665	up
AT1G02900.1	81	95	98	291	334	324	19.515	21.3366	24.3866	77.4138	81.9145	83.4555	5.44102e-18	1.50746	up
AT1G03090.2	401	395	356	53	75	55	96.6111	88.7153	88.588	14.0994	18.394	14.1668	1.05531e-59	-2.91201	down
AT1G03130.1	4091	4082	3624	1028	1132	983	985.626	916.799	901.806	273.476	277.626	253.2	5.22695e-232	-2.18142	down
AT1G03220.1	803	888	773	460	462	459	193.463	199.441	192.355	122.372	113.307	118.229	1.04912e-33	-1.10587	down
AT1G03310.1	27	13	26	6	0	0	6.50499	2.91974	6.46991	1.59616	0	0	0.000701805	-3.06665	down
AT1G03410.1	19	29	19	67	71	71	4.57759	6.51327	4.72801	17.8238	17.413	18.2881	0.000331345	1.33925	up
AT1G03440.1	42	49	56	20	31	27	10.1189	11.0052	13.9352	5.32054	7.60284	6.95463	0.00452935	-1.16119	down
AT1G03475.1	493	495	463	250	301	252	118.776	111.175	115.214	66.5067	73.8212	64.9099	2.4958e-20	-1.127	down
AT1G03600.1	806	877	706	116	103	102	194.186	196.97	175.683	30.8591	25.2611	26.273	3.28101e-122	-3.1545	down
AT1G03610.1	108	118	113	50	66	57	26.02	26.5023	28.1192	13.3013	16.1867	14.682	8.20475e-07	-1.23281	down
AT1G03680.1	1467	1478	1280	395	454	419	353.438	331.952	318.519	105.081	111.345	107.926	4.42518e-114	-2.00795	down
AT1G03790.1	14	10	18	2	2	2	3.37296	2.24596	4.47917	0.532054	0.490506	0.515158	0.00169119	-2.64755	down
AT1G03820.1	1	4	4	19	30	41	0.240926	0.898383	0.995371	5.05451	7.35759	10.5607	0.000150999	2.73065	up
AT1G03840.1	0	3	0	15	21	16	0	0.673787	0	3.9904	5.15031	4.12126	0.00115783	3.07473	up
AT1G04040.1	324	327	373	1037	1191	1003	78.0599	73.4428	92.8183	275.87	292.096	258.352	1.28723e-34	1.37529	up
AT1G04220.1	8	11	9	88	90	68	1.9274	2.47055	2.23958	23.4104	22.0728	17.5154	2.71096e-11	2.76209	up
AT1G04250.1	208	242	257	644	742	563	50.1125	54.3521	63.9526	171.321	181.978	145.017	1.93936e-16	1.18037	up
AT1G04330.1	2	5	3	21	29	28	0.481851	1.12298	0.746528	5.58656	7.11234	7.21221	0.000468663	2.43937	up
AT1G04420.1	330	332	262	109	115	115	79.5054	74.5658	65.1968	28.9969	28.2041	29.6216	4.67898e-24	-1.7092	down
AT1G04640.1	113	140	87	63	67	53	27.2246	31.4434	21.6493	16.7597	16.432	13.6517	3.82931e-05	-1.14591	down
AT1G05140.1	93	99	81	38	56	48	22.4061	22.235	20.1563	10.109	13.7342	12.3638	3.27744e-05	-1.20078	down
AT1G05190.1	1716	1757	1596	612	652	597	413.428	394.615	397.153	162.808	159.905	153.775	3.2197e-122	-1.71836	down
AT1G05210.1	17	30	23	58	67	59	4.09573	6.73787	5.72338	15.4296	16.432	15.1971	0.00642292	1.09423	up
AT1G05250.1	56	44	23	670	770	909	13.4918	9.88221	5.72338	178.238	188.845	234.139	8.08592e-68	3.93947	up
AT1G05260.1	70	74	72	318	381	361	16.8648	16.6201	17.9167	84.5965	93.4414	92.9859	1.24406e-30	2.00617	up
AT1G05300.1	137	155	148	352	397	444	33.0068	34.8123	36.8287	93.6415	97.3654	114.365	5.13399e-13	1.15918	up
AT1G05385.1	171	184	162	74	51	73	41.1983	41.3256	40.3125	19.686	12.5079	18.8033	4.22545e-12	-1.63468	down
AT1G05560.1	142	178	111	32	40	50	34.2114	39.978	27.6215	8.51286	9.81012	12.8789	4.27734e-13	-2.05456	down
AT1G05620.1	28	40	56	91	102	117	6.74592	8.98383	13.9352	24.2084	25.0158	30.1367	0.00435629	1.02226	up
AT1G05700.1	3	2	3	31	40	29	0.722777	0.449191	0.746528	8.24683	9.81012	7.46979	4.86414e-06	3.04871	up
AT1G05710.2	9	14	6	56	49	58	2.16833	3.14434	1.49306	14.8975	12.0174	14.9396	8.04872e-06	2.13133	up
AT1G05970.2	71	78	63	35	39	42	17.1057	17.5185	15.6771	9.31094	9.56487	10.8183	0.000427131	-1.12199	down
AT1G05990.1	0	0	0	6	10	18	0	0	0	1.59616	2.45253	4.63642	0.000874821	3.79828	up
AT1G06000.1	12	12	15	66	68	62	2.89111	2.69515	3.73264	17.5578	16.6772	15.9699	9.89722e-07	1.98766	up
AT1G06040.1	267	396	405	122	172	181	64.3271	88.9399	100.781	32.4553	42.1835	46.6218	2.16387e-11	-1.43138	down
AT1G06090.1	5	8	8	44	56	54	1.20463	1.79677	1.99074	11.7052	13.7342	13.9093	6.38713e-07	2.47282	up
AT1G06160.1	41	34	30	125	109	119	9.87795	7.63625	7.46528	33.2534	26.7326	30.6519	7.97119e-07	1.45268	up
AT1G06360.1	45	55	47	135	150	99	10.8416	12.3528	11.6956	35.9136	36.788	25.5003	0.000141574	1.09416	up
AT1G06460.1	1258	1369	1095	626	708	654	303.084	307.471	272.483	166.533	173.639	168.457	3.71446e-41	-1.17586	down
AT1G06510.1	132	132	118	72	62	83	31.8022	29.6466	29.3634	19.1539	15.2057	21.379	1.48049e-05	-1.0748	down
AT1G06640.1	268	320	279	1780	1744	1861	64.568	71.8706	69.4271	473.528	427.721	479.354	9.11154e-139	2.35919	up
AT1G06680.1	8054	8636	7328	1190	1347	1198	1940.41	1939.61	1823.52	316.572	330.356	308.579	0	-2.95693	down
AT1G06830.1	1	6	5	79	94	87	0.240926	1.34757	1.24421	21.0161	23.0538	22.4094	5.61876e-15	3.93478	up
AT1G06923.1	0	1	2	9	26	19	0	0.224596	0.497685	2.39424	6.37658	4.894	0.000998461	3.09526	up
AT1G06950.1	432	421	441	205	212	185	104.08	94.5548	109.74	54.5355	51.9936	47.6521	3.32668e-24	-1.37569	down
AT1G07000.1	85	97	77	222	223	227	20.4787	21.7858	19.1609	59.058	54.6914	58.4704	1.40108e-08	1.09635	up
AT1G07050.1	73	78	60	8	9	11	17.5876	17.5185	14.9306	2.12821	2.20728	2.83337	5.16142e-14	-3.07526	down
AT1G07090.1	98	115	114	266	293	284	23.6107	25.8285	28.3681	70.7631	71.8591	73.1524	3.01599e-10	1.08535	up
AT1G07110.1	146	132	147	39	35	68	35.1751	29.6466	36.5799	10.375	8.58386	17.5154	2.81276e-09	-1.82145	down
AT1G07260.1	11	6	8	28	44	42	2.65018	1.34757	1.99074	7.44875	10.7911	10.8183	0.0012796	1.79757	up
AT1G07280.1	130	125	123	55	66	56	31.3203	28.0745	30.6077	14.6315	16.1867	14.4244	1.18415e-08	-1.35725	down
AT1G07320.1	860	847	714	231	278	240	207.196	190.233	177.674	61.4522	68.1803	61.8189	1.93304e-63	-1.96245	down
AT1G07520.1	6	6	4	24	35	22	1.44555	1.34757	0.995371	6.38464	8.58386	5.66673	0.00327825	1.90608	up
AT1G07620.1	12	13	15	85	106	102	2.89111	2.91974	3.73264	22.6123	25.9968	26.273	2.68321e-12	2.52686	up
AT1G07640.1	34	42	40	100	113	96	8.19147	9.43302	9.95371	26.6027	27.7136	24.7276	0.000120161	1.12136	up
AT1G07680.1	1	0	0	17	24	23	0.240926	0	0	4.52246	5.88607	5.92431	1.53009e-05	4.14329	up
AT1G07985.1	16	7	22	1	0	1	3.85481	1.57217	5.47454	0.266027	0	0.257579	0.000148715	-3.64622	down
AT1G08050.1	18	21	22	57	71	84	4.33666	4.71651	5.47454	15.1635	17.413	21.6366	0.000128249	1.48077	up
AT1G08090.1	0	0	0	178	199	224	0	0	0	47.3528	48.8053	57.6977	2.12837e-20	7.61912	up
AT1G08230.2	43	35	34	18	17	21	10.3598	7.86085	8.46065	4.78848	4.1693	5.40915	0.00760226	-1.23047	down
AT1G08290.1	2	3	2	13	16	19	0.481851	0.673787	0.497685	3.45835	3.92405	4.894	0.00945201	2.17723	up
AT1G08320.2	5	0	2	21	15	26	1.20463	0	0.497685	5.58656	3.6788	6.69705	0.00456072	2.4445	up
AT1G08340.1	7	9	13	37	39	46	1.68648	2.02136	3.23496	9.84299	9.56487	11.8486	0.00108455	1.70887	up
AT1G08380.1	18097	18998	16774	2229	2522	2294	4360.03	4266.87	4174.09	592.974	618.528	590.886	0	-3.20815	down
AT1G08500.1	26	42	44	104	95	105	6.26406	9.43302	10.9491	27.6668	23.299	27.0458	0.000439693	1.14826	up
AT1G08520.1	352	427	338	173	185	171	84.8058	95.9023	84.1088	46.0226	45.3718	44.046	2.44627e-21	-1.34406	down
AT1G08540.1	164	199	158	52	76	73	39.5118	44.6945	39.3171	13.8334	18.6392	18.8033	4.18238e-13	-1.63126	down
AT1G08550.1	191	238	175	35	32	44	46.0168	53.4538	43.5475	9.31094	7.8481	11.3335	1.4244e-28	-2.67849	down
AT1G08570.1	295	353	303	148	171	161	71.073	79.2823	75.3993	39.372	41.9383	41.4702	2.17269e-17	-1.25403	down
AT1G08630.2	676	773	714	3	3	3	162.866	173.612	177.674	0.798081	0.735759	0.772736	7.61815e-75	-7.81581	down
AT1G08660.1	0	0	3	24	15	19	0	0	0.746528	6.38464	3.6788	4.894	0.000588843	3.19376	up
AT1G08660.2	20	25	28	0	0	0	4.81851	5.61489	6.9676	0	0	0	4.69898e-08	-5.34595	down
AT1G08980.1	312	317	251	121	124	119	75.1688	71.1968	62.4595	32.1892	30.4114	30.6519	4.60031e-20	-1.53725	down
AT1G08990.1	1	1	1	21	27	23	0.240926	0.224596	0.248843	5.58656	6.62183	5.92431	1.93639e-05	3.5737	up
AT1G09090.1	4	3	2	47	29	39	0.963702	0.673787	0.497685	12.5033	7.11234	10.0456	1.65922e-06	3.10872	up
AT1G09130.2	28	32	26	4	6	6	6.74592	7.18706	6.46991	1.06411	1.47152	1.54547	1.47671e-05	-2.52077	down
AT1G09240.1	135	143	112	420	500	501	32.5249	32.1172	27.8704	111.731	122.627	129.047	2.02898e-25	1.58407	up
AT1G09340.1	912	945	746	123	134	144	219.724	212.243	185.637	32.7213	32.8639	37.0913	7.98035e-112	-2.95975	down
AT1G09390.1	51	40	56	19	18	25	12.2872	8.98383	13.9352	5.05451	4.41455	6.43947	0.000533449	-1.47607	down
AT1G09415.1	111	133	103	57	71	67	26.7427	29.8712	25.6308	15.1635	17.413	17.2578	1.11233e-05	-1.09154	down
AT1G09740.1	286	288	308	730	735	820	68.9047	64.6835	76.6436	194.2	180.261	211.215	2.24079e-19	1.09524	up
AT1G09750.1	592	553	550	349	316	277	142.628	124.201	136.863	92.8434	77.4999	71.3493	9.79822e-17	-1.11852	down
AT1G09932.1	47	40	50	185	217	259	11.3235	8.98383	12.4421	49.215	53.2199	66.7129	2.42057e-15	1.96753	up
AT1G09932.2	4	2	5	20	35	51	0.963702	0.449191	1.24421	5.32054	8.58386	13.1365	7.84468e-05	2.7029	up
AT1G10060.2	100	83	68	52	55	40	24.0926	18.6414	16.9213	13.8334	13.4889	10.3032	0.00145671	-1.02965	down
AT1G10070.1	175	222	163	48	69	64	42.162	49.8602	40.5614	12.7693	16.9225	16.485	9.79649e-17	-1.88186	down
AT1G10070.3	13	16	18	0	2	0	3.13203	3.59353	4.47917	0	0.490506	0	5.42966e-05	-3.7618	down
AT1G10140.1	70	77	66	29	39	31	16.8648	17.2939	16.4236	7.71478	9.56487	7.98494	2.61832e-05	-1.35506	down
AT1G10360.1	84	91	93	18	17	12	20.2377	20.4382	23.1424	4.78848	4.1693	3.09095	2.69207e-15	-2.71951	down
AT1G10400.1	0	0	0	26	13	14	0	0	0	6.9167	3.18829	3.6061	3.26863e-05	4.42862	up
AT1G10480.1	18	19	22	67	82	106	4.33666	4.26732	5.47454	17.8238	20.1107	27.3034	2.1616e-06	1.78626	up
AT1G10510.1	66	67	72	33	46	32	15.9011	15.0479	17.9167	8.77889	11.2816	8.24252	0.000657323	-1.14293	down
AT1G10522.2	64	71	64	44	23	20	15.4192	15.9463	15.9259	11.7052	5.64082	5.15158	0.000604232	-1.41566	down
AT1G10770.1	22	25	20	7	6	3	5.30036	5.61489	4.97685	1.86219	1.47152	0.772736	0.000852137	-2.15595	down
AT1G10960.1	1005	1139	766	470	494	482	242.13	255.814	190.614	125.033	121.155	124.153	1.30462e-23	-1.27354	down
AT1G10970.1	7	18	16	128	149	140	1.68648	4.04272	3.98148	34.0514	36.5427	36.061	3.53762e-18	2.99875	up
AT1G10990.2	16	26	18	65	85	64	3.85481	5.83949	4.47917	17.2917	20.8465	16.485	7.61181e-05	1.52015	up
AT1G11260.1	829	938	786	387	426	431	199.727	210.671	195.59	102.952	104.478	111.016	2.15772e-42	-1.30724	down
AT1G11330.1	35	35	33	78	90	95	8.43239	7.86085	8.21181	20.7501	22.0728	24.47	0.000868657	1.05846	up
AT1G11362.1	51	56	60	8	16	16	12.2872	12.5774	14.9306	2.12821	3.92405	4.12126	1.00697e-07	-2.25942	down
AT1G11380.1	78	75	66	32	30	27	18.7922	16.8447	16.4236	8.51286	7.35759	6.95463	1.99431e-06	-1.54181	down
AT1G11450.1	6	14	6	43	44	55	1.44555	3.14434	1.49306	11.4392	10.7911	14.1668	6.96311e-05	2.07677	up
AT1G11530.1	840	844	765	280	312	300	202.377	189.559	190.365	74.4875	76.5189	77.2736	9.67145e-66	-1.72838	down
AT1G11540.1	1	2	0	15	13	12	0.240926	0.449191	0	3.9904	3.18829	3.09095	0.00471247	2.75646	up
AT1G11580.1	65	57	50	630	671	650	15.6602	12.802	12.4421	167.597	164.565	167.426	6.1731e-90	3.21159	up
AT1G11670.1	80	48	52	149	158	156	19.274	10.7806	12.9398	39.638	38.75	40.1823	0.000184614	1.06711	up
AT1G11700.1	54	44	55	328	380	383	13.01	9.88221	13.6863	87.2568	93.1961	98.6527	4.65947e-38	2.53496	up
AT1G11820.2	125	145	105	52	76	59	30.1157	32.5664	26.1285	13.8334	18.6392	15.1971	9.48505e-07	-1.2624	down
AT1G11840.1	132	166	163	777	876	1042	31.8022	37.2829	40.5614	206.703	214.842	268.397	3.2474e-50	2.26338	up
AT1G11860.1	1274	1269	1123	355	438	390	306.939	285.012	279.45	94.4395	107.421	100.456	6.41399e-89	-1.90427	down
AT1G11860.2	23	20	9	0	0	0	5.54129	4.49191	2.23958	0	0	0	3.20962e-06	-4.81611	down
AT1G12040.1	8	13	9	82	99	97	1.9274	2.91974	2.23958	21.8142	24.28	24.9851	3.64778e-13	2.84761	up
AT1G12080.2	1613	1595	2491	723	616	484	388.613	358.23	619.867	192.337	151.076	124.668	4.04742e-09	-1.88748	down
AT1G12090.1	6532	6634	6336	3088	3113	2602	1573.73	1489.97	1576.67	821.491	763.473	670.22	2.88697e-91	-1.42144	down
AT1G12110.1	340	319	392	1357	1410	1343	81.9147	71.646	97.5463	360.998	345.807	345.928	5.09366e-52	1.68475	up
AT1G12140.1	104	84	80	220	209	259	25.0563	18.866	19.9074	58.5259	51.2579	66.7129	1.40639e-06	1.07608	up
AT1G12160.1	6	8	9	74	65	67	1.44555	1.79677	2.23958	19.686	15.9414	17.2578	6.48803e-10	2.77276	up
AT1G12230.1	203	108	183	23	35	5	48.9079	24.2563	45.5382	6.11862	8.58386	1.28789	1.99047e-11	-3.12694	down
AT1G12290.1	1	2	1	21	26	22	0.240926	0.449191	0.248843	5.58656	6.37658	5.66673	5.51256e-05	3.27139	up
AT1G12420.1	14	16	17	65	77	63	3.37296	3.59353	4.23033	17.2917	18.8845	16.2275	3.59695e-06	1.79543	up
AT1G12430.2	0	0	0	71	23	63	0	0	0	18.8879	5.64082	16.2275	1.30088e-09	5.77313	up
AT1G12440.1	683	776	731	279	331	277	164.552	174.286	181.904	74.2215	81.1787	71.3493	2.30393e-49	-1.57576	down
AT1G12560.1	13	20	10	145	161	179	3.13203	4.49191	2.48843	38.5739	39.4857	46.1066	2.80822e-22	3.15584	up
AT1G12780.1	541	689	640	168	199	189	130.341	154.746	159.259	44.6925	48.8053	48.6824	1.7506e-53	-2.01632	down
AT1G12800.1	224	208	181	56	84	90	53.9673	46.7159	45.0405	14.8975	20.6013	23.1821	2.29712e-13	-1.67413	down
AT1G12805.1	1	0	0	22	29	42	0.240926	0	0	5.85259	7.11234	10.8183	3.89415e-07	4.633	up
AT1G12850.1	3	0	0	35	11	17	0.722777	0	0	9.31094	2.69778	4.37884	0.000761572	3.23189	up
AT1G12860.1	69	54	51	18	29	22	16.6239	12.1282	12.691	4.78848	7.11234	5.66673	5.70118e-05	-1.5716	down
AT1G12900.1	3888	4036	3331	529	597	535	936.718	906.468	828.895	140.728	146.416	137.805	0	-3.03048	down
AT1G12940.1	1	1	1	691	895	903	0.240926	0.224596	0.248843	183.825	219.501	232.594	6.32011e-48	8.47176	up
AT1G12950.1	2	3	1	43	62	57	0.481851	0.673787	0.248843	11.4392	15.2057	14.682	2.4793e-10	4.05926	up
AT1G13090.1	39	34	24	118	78	105	9.3961	7.63625	5.97222	31.3912	19.1297	27.0458	0.000191511	1.33648	up
AT1G13100.1	21	26	16	63	58	61	5.05944	5.83949	3.98148	16.7597	14.2247	15.7123	0.00213978	1.22875	up
AT1G13110.1	311	411	322	1128	1137	1176	74.9278	92.3088	80.1273	300.078	278.853	302.913	1.07518e-42	1.44787	up
AT1G13245.1	978	1125	975	271	303	317	235.625	252.67	242.622	72.0933	74.3117	81.6525	1.02887e-97	-2.05706	down
AT1G13260.1	431	473	436	222	207	212	103.839	106.234	108.495	59.058	50.7674	54.6067	1.04033e-25	-1.33196	down
AT1G13300.1	77	71	61	19	12	8	18.5513	15.9463	15.1794	5.05451	2.94304	2.06063	3.16775e-10	-2.60077	down
AT1G13340.1	10	11	6	54	49	63	2.40926	2.47055	1.49306	14.3655	12.0174	16.2275	1.99236e-06	2.25094	up
AT1G13390.2	73	69	90	188	186	195	17.5876	15.4971	22.3958	50.013	45.6171	50.2279	1.04103e-05	1.00719	up
AT1G13420.1	1	4	3	299	367	321	0.240926	0.898383	0.746528	79.542	90.0079	82.6828	9.39158e-41	6.31206	up
AT1G13430.1	15	20	23	77	72	50	3.61388	4.49191	5.72338	20.4841	17.6582	12.8789	0.000469678	1.45738	up
AT1G13470.1	0	0	1	15	12	20	0	0	0.248843	3.9904	2.94304	5.15158	0.000270717	3.70261	up
AT1G13510.1	1	1	3	14	23	26	0.240926	0.224596	0.746528	3.72438	5.64082	6.69705	0.000545003	2.87746	up
AT1G13520.1	1	1	3	19	34	23	0.240926	0.224596	0.746528	5.05451	8.3386	5.92431	7.03114e-05	3.14251	up
AT1G13700.1	41	52	44	8	5	1	9.87795	11.679	10.9491	2.12821	1.22627	0.257579	3.58704e-09	-3.32306	down
AT1G13750.1	29	34	26	77	95	85	6.98684	7.63625	6.46991	20.4841	23.299	21.8942	0.000150002	1.23234	up
AT1G13820.1	182	178	157	75	91	74	43.8484	39.978	39.0683	19.952	22.318	19.0608	3.4563e-11	-1.37193	down
AT1G13830.1	7	13	5	88	100	120	1.68648	2.91974	1.24421	23.4104	24.5253	30.9095	1.5632e-14	3.2332	up
AT1G13930.1	11640	13170	10344	3019	3596	3454	2804.37	2957.92	2574.03	803.135	881.93	889.677	2.59248e-206	-2.07423	down
AT1G13970.1	4	4	3	43	31	31	0.963702	0.898383	0.746528	11.4392	7.60284	7.98494	1.27224e-05	2.74807	up
AT1G14030.1	31	32	29	7	14	5	7.46869	7.18706	7.21644	1.86219	3.43354	1.28789	0.000462633	-1.98304	down
AT1G14040.1	5	1	3	25	32	32	1.20463	0.224596	0.746528	6.65067	7.8481	8.24252	8.99129e-05	2.72423	up
AT1G14070.1	16	21	17	99	117	112	3.85481	4.71651	4.23033	26.3367	28.6946	28.8488	2.24724e-12	2.27997	up
AT1G14080.1	7	4	6	46	64	55	1.68648	0.898383	1.49306	12.2372	15.6962	14.1668	3.17995e-08	2.83568	up
AT1G14150.1	226	289	201	16	13	14	54.4492	64.9081	50.0174	4.25643	3.18829	3.6061	1.38721e-48	-4.24636	down
AT1G14170.1	12	11	10	52	32	38	2.89111	2.47055	2.48843	13.8334	7.8481	9.78799	0.0034071	1.54152	up
AT1G14170.3	87	84	78	238	234	285	20.9605	18.866	19.4097	63.3144	57.3892	73.41	6.91578e-11	1.32075	up
AT1G14220.1	0	1	1	13	21	16	0	0.224596	0.248843	3.45835	5.15031	4.12126	0.000386345	3.3838	up
AT1G14280.1	84	115	114	58	47	51	20.2377	25.8285	28.3681	15.4296	11.5269	13.1365	1.09599e-05	-1.25558	down
AT1G14290.1	103	123	115	71	63	58	24.8153	27.6253	28.6169	18.8879	15.4509	14.9396	1.65672e-05	-1.08774	down
AT1G14345.1	248	272	211	59	56	55	59.7495	61.09	52.5058	15.6956	13.7342	14.1668	5.3239e-32	-2.35542	down
AT1G14370.1	94	102	95	274	265	251	22.647	22.9088	23.6401	72.8914	64.992	64.6523	8.83261e-11	1.16049	up
AT1G14780.1	30	40	33	127	122	127	7.22777	8.98383	8.21181	33.7854	29.9209	32.7125	1.24384e-08	1.57439	up
AT1G14890.1	889	923	1027	415	404	372	214.183	207.302	255.561	110.401	99.0822	95.8193	2.59565e-41	-1.52562	down
AT1G14960.1	75	81	64	424	607	607	18.0694	18.1922	15.9259	112.795	148.869	156.35	1.07515e-42	2.60049	up
AT1G15010.1	83	113	124	47	35	49	19.9968	25.3793	30.8565	12.5033	8.58386	12.6214	7.50223e-07	-1.53036	down
AT1G15040.1	367	436	407	8	6	8	88.4197	97.9237	101.279	2.12821	1.47152	2.06063	3.83283e-74	-5.91122	down
AT1G15040.2	45	64	35	0	0	0	10.8416	14.3741	8.70949	0	0	0	9.1748e-12	-6.2163	down
AT1G15100.1	85	101	87	280	300	258	20.4787	22.6842	21.6493	74.4875	73.5759	66.4553	5.54291e-14	1.33618	up
AT1G15110.2	24	21	28	64	69	80	5.78221	4.71651	6.9676	17.0257	16.9225	20.6063	0.000970954	1.23602	up
AT1G15180.1	86	107	94	23	26	18	20.7196	24.0317	23.3912	6.11862	6.37658	4.63642	1.25624e-13	-2.32542	down
AT1G15210.1	9	19	19	117	118	99	2.16833	4.26732	4.72801	31.1251	28.9399	25.5003	3.40066e-12	2.49122	up
AT1G15240.3	0	0	0	11	18	13	0	0	0	2.9263	4.41455	3.34852	0.000153149	4.14519	up
AT1G15260.1	194	197	204	80	80	68	46.7396	44.2453	50.7639	21.2821	19.6202	17.5154	1.24784e-16	-1.64676	down
AT1G15380.1	210	248	229	46	38	34	50.5944	55.6997	56.985	12.2372	9.31961	8.75768	2.24511e-36	-2.78453	down
AT1G15385.1	0	2	2	16	19	16	0	0.449191	0.497685	4.25643	4.65981	4.12126	0.00151926	2.82467	up
AT1G15410.1	22	25	25	87	73	57	5.30036	5.61489	6.22107	23.1443	17.9035	14.682	0.000805836	1.28538	up
AT1G15550.1	3	4	1	22	21	21	0.722777	0.898383	0.248843	5.85259	5.15031	5.40915	0.00148391	2.42578	up
AT1G15610.2	0	0	1	13	11	9	0	0	0.248843	3.45835	2.69778	2.31821	0.00304422	3.21781	up
AT1G15630.1	0	0	0	21	13	14	0	0	0	5.58656	3.18829	3.6061	5.74498e-05	4.32493	up
AT1G15640.1	1	0	1	14	23	29	0.240926	0	0.248843	3.72438	5.64082	7.46979	4.01741e-05	3.74291	up
AT1G15710.1	74	80	75	47	41	41	17.8285	17.9677	18.6632	12.5033	10.0554	10.5607	0.000376814	-1.08249	down
AT1G15730.1	118	137	116	46	60	32	28.4292	30.7696	28.8658	12.2372	14.7152	8.24252	2.3599e-09	-1.67746	down
AT1G15790.2	27	38	34	133	125	154	6.50499	8.53463	8.46065	35.3816	30.6566	39.6671	5.93508e-10	1.75952	up
AT1G15820.1	13935	14533	13165	2804	3028	2536	3357.3	3264.05	3276.01	745.939	742.626	653.22	0	-2.58829	down
AT1G15980.1	71	76	52	11	11	7	17.1057	17.0693	12.9398	2.9263	2.69778	1.80305	3.95098e-12	-2.93758	down
AT1G16170.1	185	220	218	83	63	71	44.5712	49.411	54.2477	22.0802	15.4509	18.2881	8.16938e-17	-1.7758	down
AT1G16320.1	237	256	159	90	99	111	57.0994	57.4965	39.566	23.9424	24.28	28.5912	1.68028e-09	-1.37446	down
AT1G16400.1	47	50	49	177	191	196	11.3235	11.2298	12.1933	47.0868	46.8433	50.4854	1.28435e-13	1.65854	up
AT1G16410.1	12	19	17	80	98	80	2.89111	4.26732	4.23033	21.2821	24.0348	20.6063	9.423e-09	2.09561	up
AT1G16500.1	5	8	3	25	26	28	1.20463	1.79677	0.746528	6.65067	6.37658	7.21221	0.00408121	1.88367	up
AT1G16530.1	1	0	1	11	13	9	0.240926	0	0.248843	2.9263	3.18829	2.31821	0.00735097	2.80173	up
AT1G16720.1	241	234	196	52	60	55	58.0631	52.5554	48.7732	13.8334	14.7152	14.1668	4.03577e-28	-2.26127	down
AT1G16880.1	1402	1493	1379	454	470	399	337.778	335.321	343.154	120.776	115.269	102.774	1.16223e-119	-1.96335	down
AT1G16910.1	12	18	8	0	0	0	2.89111	4.04272	1.99074	0	0	0	4.04801e-05	-4.41025	down
AT1G17020.1	34	34	35	151	161	192	8.19147	7.63625	8.70949	40.1701	39.4857	49.4551	3.25016e-14	1.98878	up
AT1G17090.1	4	7	7	48	57	44	0.963702	1.57217	1.7419	12.7693	13.9794	11.3335	3.90425e-07	2.62553	up
AT1G17100.1	258	272	210	83	115	96	62.1588	61.09	52.257	22.0802	28.2041	24.7276	7.60945e-17	-1.59506	down
AT1G17200.1	411	414	370	226	257	224	99.0204	92.9826	92.0718	60.1221	63.03	57.6977	2.41011e-15	-1.02922	down
AT1G17220.1	282	321	230	101	97	84	67.941	72.0952	57.2338	26.8687	23.7895	21.6366	3.96046e-22	-1.81906	down
AT1G17590.1	7	9	5	40	35	49	1.68648	2.02136	1.24421	10.6411	8.58386	12.6214	6.34567e-05	2.16866	up
AT1G17620.1	68	90	81	209	199	229	16.3829	20.2136	20.1563	55.5996	48.8053	58.9855	9.01504e-08	1.13437	up
AT1G17650.1	89	88	83	42	54	58	21.4424	19.7644	20.6539	11.1731	13.2437	14.9396	0.00049152	-1.01666	down
AT1G17710.1	31	21	30	5	4	4	7.46869	4.71651	7.46528	1.33013	0.981012	1.03032	1.50304e-05	-2.70877	down
AT1G17745.1	17	25	26	596	688	629	4.09573	5.61489	6.46991	158.552	168.734	162.017	1.11285e-99	4.49492	up
AT1G17810.1	46	28	45	1	0	1	11.0826	6.28868	11.1979	0.266027	0	0.257579	1.62268e-10	-5.0807	down
AT1G18000.1	110	104	86	58	56	47	26.5018	23.3579	21.4005	15.4296	13.7342	12.1062	2.93782e-05	-1.15532	down
AT1G18060.1	277	326	272	76	85	81	66.7364	73.2182	67.6852	20.218	20.8465	20.8639	3.99094e-35	-2.11381	down
AT1G18100.1	15	14	12	51	66	69	3.61388	3.14434	2.98611	13.5674	16.1867	17.7729	1.02764e-05	1.84306	up
AT1G18140.1	3	0	2	12	18	18	0.722777	0	0.497685	3.19232	4.41455	4.63642	0.00651427	2.47535	up
AT1G18150.2	1	8	5	20	28	25	0.240926	1.79677	1.24421	5.32054	6.86708	6.43947	0.00966508	1.91338	up
AT1G18170.1	221	204	194	78	84	82	53.2445	45.8175	48.2755	20.7501	20.6013	21.1215	9.40598e-17	-1.60691	down
AT1G18330.1	86	102	102	36	50	38	20.7196	22.9088	25.382	9.57697	12.2627	9.78799	2.25994e-07	-1.48023	down
AT1G18330.2	17	17	13	3	3	1	4.09573	3.81813	3.23496	0.798081	0.735759	0.257579	0.000988883	-2.63413	down
AT1G18420.1	0	0	0	4	10	18	0	0	0	1.06411	2.45253	4.63642	0.00159854	3.66451	up
AT1G18460.1	80	80	77	48	39	39	19.274	17.9677	19.1609	12.7693	9.56487	10.0456	0.000142219	-1.16437	down
AT1G18470.2	35	49	24	15	21	8	8.43239	11.0052	5.97222	3.9904	5.15031	2.06063	0.00743455	-1.48429	down
AT1G18485.1	30	29	25	8	10	12	7.22777	6.51327	6.22107	2.12821	2.45253	3.09095	0.00210081	-1.66903	down
AT1G18590.1	125	130	86	253	313	327	30.1157	29.1974	21.4005	67.3048	76.7642	84.2283	7.70374e-08	1.1078	up
AT1G18620.1	86	106	81	41	52	24	20.7196	23.8071	20.1563	10.9071	12.7532	6.18189	1.69151e-05	-1.46573	down
AT1G18660.2	58	45	31	18	11	19	13.9737	10.1068	7.71412	4.78848	2.69778	4.894	0.000598826	-1.67434	down
AT1G18773.1	25	39	38	17	14	15	6.02314	8.75923	9.45602	4.52246	3.43354	3.86368	0.00639155	-1.3591	down
AT1G18810.1	29	22	21	0	4	1	6.98684	4.9411	5.2257	0	0.981012	0.257579	4.58969e-06	-3.57314	down
AT1G18910.1	4	14	10	39	45	48	0.963702	3.14434	2.48843	10.375	11.0364	12.3638	0.000536676	1.8675	up
AT1G18970.1	0	0	0	15	19	16	0	0	0	3.9904	4.65981	4.12126	3.65263e-05	4.39694	up
AT1G18980.1	4	7	6	43	40	34	0.963702	1.57217	1.49306	11.4392	9.81012	8.75768	2.58658e-05	2.35961	up
AT1G19150.1	127	150	105	26	25	26	30.5975	33.6893	26.1285	6.9167	6.13133	6.69705	7.04108e-19	-2.53616	down
AT1G19180.2	8	7	8	31	32	30	1.9274	1.57217	1.99074	8.24683	7.8481	7.72736	0.00405333	1.64055	up
AT1G19330.1	34	22	29	84	103	80	8.19147	4.9411	7.21644	22.3463	25.2611	20.6063	0.000114566	1.33817	up
AT1G19350.1	314	329	354	203	202	188	75.6506	73.892	88.0903	54.0035	49.5411	48.4248	7.84019e-12	-1.02099	down
AT1G19400.1	39	44	43	15	17	13	9.3961	9.88221	10.7002	3.9904	4.1693	3.34852	9.33777e-05	-1.70025	down
AT1G19400.2	159	175	168	73	86	72	38.3072	39.3042	41.8056	19.42	21.0918	18.5457	1.45799e-11	-1.38425	down
AT1G19510.1	0	0	0	25	20	14	0	0	0	6.65067	4.90506	3.6061	1.13008e-05	4.59447	up
AT1G19530.1	319	458	352	121	141	182	76.8552	102.865	87.5926	32.1892	34.5807	46.8793	1.68934e-16	-1.60184	down
AT1G19610.1	530	609	559	191	177	196	127.691	136.779	139.103	50.8111	43.4098	50.4854	7.4742e-50	-1.85581	down
AT1G19740.1	409	425	355	165	202	193	98.5385	95.4532	88.3392	43.8944	49.5411	49.7127	7.00031e-22	-1.35533	down
AT1G19900.1	5	6	4	23	35	24	1.20463	1.34757	0.995371	6.11862	8.58386	6.18189	0.00189097	2.00771	up
AT1G19960.1	29	39	43	208	237	254	6.98684	8.75923	10.7002	55.3336	58.125	65.425	1.15311e-22	2.35183	up
AT1G20020.1	2355	2705	2125	312	359	358	567.38	607.531	528.791	83.0004	88.0458	92.2132	1.67838e-257	-3.07008	down
AT1G20140.1	51	45	36	145	112	116	12.2872	10.1068	8.95834	38.5739	27.4683	29.8791	4.94604e-05	1.209	up
AT1G20340.1	13271	13919	12059	2254	2562	2192	3197.32	3126.15	3000.79	599.625	628.338	564.613	0	-2.75879	down
AT1G20440.1	830	862	780	435	469	499	199.968	193.601	194.097	115.722	115.024	128.532	2.62797e-29	-1.08897	down
AT1G20510.1	38	43	41	155	182	193	9.15517	9.65761	10.2026	41.2342	44.636	49.7127	7.47905e-14	1.82259	up
AT1G20640.1	12	9	17	99	96	100	2.89111	2.02136	4.23033	26.3367	23.5443	25.7579	5.20715e-12	2.6007	up
AT1G20650.1	114	89	99	61	51	42	27.4655	19.989	24.6354	16.2276	12.5079	10.8183	4.23298e-05	-1.2287	down
AT1G20823.1	16	21	19	50	67	62	3.85481	4.71651	4.72801	13.3013	16.432	15.9699	0.000746918	1.36099	up
AT1G20830.1	65	53	59	25	35	25	15.6602	11.9036	14.6817	6.65067	8.58386	6.43947	0.000406359	-1.3086	down
AT1G21110.1	57	81	58	283	280	335	13.7328	18.1922	14.4329	75.2856	68.6708	86.2889	2.95991e-20	1.91144	up
AT1G21120.1	33	41	29	321	365	364	7.95054	9.20842	7.21644	85.3946	89.5173	93.7587	1.28205e-47	3.04845	up
AT1G21240.1	1	3	0	35	33	64	0.240926	0.673787	0	9.31094	8.09335	16.485	4.45412e-08	4.13262	up
AT1G21250.1	64	83	79	368	410	452	15.4192	18.6414	19.6586	97.8979	100.554	116.426	2.36565e-33	2.15675	up
AT1G21310.1	801	876	849	9108	8565	8733	192.981	196.746	211.267	2422.97	2100.59	2249.44	0	3.11051	up
AT1G21350.3	132	127	101	72	57	55	31.8022	28.5236	25.1331	19.1539	13.9794	14.1668	4.70702e-06	-1.22237	down
AT1G21400.1	578	637	634	158	187	163	139.255	143.067	157.766	42.0322	45.8623	41.9853	6.41149e-67	-2.13324	down
AT1G21410.1	54	46	40	22	23	29	13.01	10.3314	9.95371	5.85259	5.64082	7.46979	0.00526988	-1.15988	down
AT1G21440.1	103	88	77	344	327	325	24.8153	19.7644	19.1609	91.5132	80.1977	83.7131	1.1673e-18	1.60932	up
AT1G21500.1	2228	2396	2088	382	395	373	536.782	538.131	519.584	101.622	96.8749	96.0769	0	-2.81504	down
AT1G21520.1	20	15	9	81	117	113	4.81851	3.36893	2.23958	21.5482	28.6946	29.1064	1.14674e-10	2.46921	up
AT1G21600.1	255	288	265	114	121	118	61.436	64.6835	65.9433	30.3271	29.6756	30.3943	8.3516e-20	-1.46071	down
AT1G21670.1	129	156	122	58	81	73	31.0794	35.0369	30.3588	15.4296	19.8655	18.8033	4.27509e-07	-1.20183	down
AT1G21680.1	923	999	807	122	145	137	222.374	224.371	200.816	32.4553	35.5617	35.2883	9.50912e-136	-3.01949	down
AT1G21830.1	89	91	84	45	37	39	21.4424	20.4382	20.9028	11.9712	9.07436	10.0456	2.26218e-06	-1.37552	down
AT1G22065.1	4	11	7	32	32	25	0.963702	2.47055	1.7419	8.51286	7.8481	6.43947	0.00842938	1.63588	up
AT1G22070.1	92	101	97	316	295	374	22.1651	22.6842	24.1377	84.0645	72.3496	96.3345	3.45278e-15	1.48219	up
AT1G22160.1	18	15	14	262	297	328	4.33666	3.36893	3.4838	69.699	72.8401	84.4858	3.02229e-45	3.89858	up
AT1G22180.2	40	44	55	146	171	189	9.63702	9.88221	13.6863	38.8399	41.9383	48.6824	1.62509e-09	1.56591	up
AT1G22220.1	4	7	9	105	138	157	0.963702	1.57217	2.23958	27.9328	33.8449	40.4399	1.662e-20	3.89275	up
AT1G22370.1	41	45	38	6	9	4	9.87795	10.1068	9.45602	1.59616	2.20728	1.03032	4.23252e-08	-2.82323	down
AT1G22410.1	507	589	471	1286	1467	1491	122.149	132.287	117.205	342.111	359.786	384.05	1.16873e-35	1.16303	up
AT1G22430.1	83	97	95	41	53	49	19.9968	21.7858	23.6401	10.9071	12.9984	12.6214	1.8449e-05	-1.20204	down
AT1G22440.1	13	17	18	92	107	79	3.13203	3.81813	4.47917	24.4745	26.2421	20.3487	9.8844e-10	2.19934	up
AT1G22500.1	307	348	280	106	100	113	73.9641	78.1593	69.676	28.1988	24.5253	29.1064	6.93839e-28	-1.81144	down
AT1G22590.1	24	44	29	9	10	5	5.78221	9.88221	7.21644	2.39424	2.45253	1.28789	0.000141785	-2.14539	down
AT1G22630.1	425	491	384	112	123	107	102.393	110.276	95.5556	29.795	30.1661	27.5609	4.57815e-49	-2.18817	down
AT1G22650.1	40	49	42	25	17	15	9.63702	11.0052	10.4514	6.65067	4.1693	3.86368	0.00131867	-1.41866	down
AT1G22690.1	695	706	507	143	200	180	167.443	158.565	126.163	38.0418	49.0506	46.3642	5.55995e-40	-2.13007	down
AT1G22740.1	138	148	147	57	59	51	33.2477	33.2402	36.5799	15.1635	14.4699	13.1365	7.66785e-13	-1.63288	down
AT1G22850.1	434	438	376	130	137	149	104.562	98.3729	93.5649	34.5835	33.5997	38.3792	4.27153e-37	-1.85012	down
AT1G22890.1	250	358	277	143	151	128	60.2314	80.4052	68.9294	38.0418	37.0332	32.9701	5.87191e-14	-1.3295	down
AT1G23040.1	122	127	140	691	671	694	29.3929	28.5236	34.838	183.825	164.565	178.76	3.22602e-55	2.1195	up
AT1G23050.1	52	32	53	11	20	17	12.5281	7.18706	13.1887	2.9263	4.90506	4.37884	0.000301599	-1.72971	down
AT1G23170.2	12	9	9	32	32	41	2.89111	2.02136	2.23958	8.51286	7.8481	10.5607	0.00747553	1.45599	up
AT1G23310.1	2317	2572	1998	436	488	477	558.224	577.66	497.188	115.988	119.683	122.865	9.89934e-188	-2.56493	down
AT1G23390.1	2013	2330	1955	310	322	338	484.983	523.308	486.487	82.4683	78.9715	87.0616	4.54652e-278	-2.96606	down
AT1G23400.1	171	195	129	60	70	66	41.1983	43.7962	32.1007	15.9616	17.1677	17.0002	1.25848e-11	-1.58941	down
AT1G23410.1	36	32	36	112	102	98	8.67332	7.18706	8.95834	29.795	25.0158	25.2427	1.78656e-05	1.2881	up
AT1G23720.1	10	13	11	148	151	112	2.40926	2.91974	2.73727	39.372	37.0332	28.8488	6.98995e-20	3.23455	up
AT1G23740.1	181	205	163	57	69	69	43.6075	46.0421	40.5614	15.1635	16.9225	17.7729	7.6085e-17	-1.75034	down
AT1G23800.1	18	26	22	95	98	102	4.33666	5.83949	5.47454	25.2726	24.0348	26.273	1.18836e-08	1.85061	up
AT1G23870.1	133	139	108	18	19	16	32.0431	31.2188	26.875	4.78848	4.65981	4.12126	1.28518e-23	-3.05409	down
AT1G24020.1	189	211	166	807	870	770	45.5349	47.3897	41.3079	214.684	213.37	198.336	5.47194e-56	1.83389	up
AT1G24145.1	7	12	4	28	41	39	1.68648	2.69515	0.995371	7.44875	10.0554	10.0456	0.00166427	1.84419	up
AT1G24260.2	310	294	286	155	190	185	74.6869	66.0311	71.169	41.2342	46.5981	47.6521	7.76069e-11	-1.02019	down
AT1G24340.1	110	109	115	64	66	48	26.5018	24.4809	28.6169	17.0257	16.1867	12.3638	8.74152e-06	-1.17031	down
AT1G24610.1	71	76	86	37	32	28	17.1057	17.0693	21.4005	9.84299	7.8481	7.21221	3.23415e-06	-1.50943	down
AT1G24625.1	14	18	18	57	53	46	3.37296	4.04272	4.47917	15.1635	12.9984	11.8486	0.00220338	1.32491	up
AT1G25211.1	20	18	17	39	56	68	4.81851	4.04272	4.23033	10.375	13.7342	17.5154	0.00586502	1.24607	up
AT1G25230.1	382	381	460	248	249	190	92.0336	85.5709	114.468	65.9747	61.068	48.94	1.39924e-10	-1.10487	down
AT1G25275.3	570	610	556	258	100	198	137.328	137.003	138.357	68.6349	24.5253	51.0006	2.07093e-05	-1.83474	down
AT1G25390.1	38	48	44	125	132	114	9.15517	10.7806	10.9491	33.2534	32.3734	29.364	4.82402e-06	1.22307	up
AT1G25400.1	148	184	140	66	79	94	35.657	41.3256	34.838	17.5578	19.375	24.2124	1.03202e-07	-1.23916	down
AT1G25440.1	332	343	340	78	76	69	79.9873	77.0363	84.6065	20.7501	18.6392	17.7729	5.39004e-48	-2.44685	down
AT1G25510.1	5	12	5	42	47	37	1.20463	2.69515	1.24421	11.1731	11.5269	9.53042	0.000105206	2.12619	up
AT1G25530.1	22	18	17	124	134	155	5.30036	4.04272	4.23033	32.9873	32.8639	39.9247	4.55702e-16	2.53117	up
AT1G25550.1	138	121	116	7	16	3	33.2477	27.1761	28.8658	1.86219	3.92405	0.772736	6.37709e-23	-3.99033	down
AT1G25560.1	1073	1171	1139	327	362	335	258.513	263.002	283.432	86.9908	88.7816	86.2889	5.38782e-110	-1.99597	down
AT1G26200.1	0	0	1	27	33	31	0	0	0.248843	7.18273	8.09335	7.98494	2.82142e-07	4.64118	up
AT1G26230.1	19	23	23	10	0	2	4.57759	5.1657	5.72338	2.66027	0	0.515158	0.00747046	-2.30775	down
AT1G26250.1	6	4	5	392	355	391	1.44555	0.898383	1.24421	104.283	87.0648	100.713	1.5578e-51	5.77428	up
AT1G26390.1	0	5	6	43	33	49	0	1.12298	1.49306	11.4392	8.09335	12.6214	8.22882e-06	2.95108	up
AT1G26761.1	48	55	32	22	10	19	11.5644	12.3528	7.96297	5.85259	2.45253	4.894	0.00117857	-1.59178	down
AT1G26800.1	155	152	160	87	78	60	37.3435	34.1385	39.8148	23.1443	19.1297	15.4547	2.13292e-08	-1.3153	down
AT1G26820.1	16	11	17	59	53	53	3.85481	2.47055	4.23033	15.6956	12.9984	13.6517	0.000346397	1.57193	up
AT1G26920.1	316	335	322	157	163	137	76.1325	75.2395	80.1273	41.7662	39.9762	35.2883	8.42433e-20	-1.35924	down
AT1G27030.1	37	27	49	306	331	323	8.91424	6.06408	12.1933	81.4042	81.1787	83.198	1.93344e-32	2.77337	up
AT1G27140.1	0	4	1	28	44	33	0	0.898383	0.248843	7.44875	10.7911	8.5001	1.45685e-06	3.60474	up
AT1G27450.1	62	76	65	190	220	243	14.9374	17.0693	16.1748	50.5451	53.9557	62.5916	6.48922e-11	1.4003	up
AT1G27450.3	0	0	0	5	7	13	0	0	0	1.33013	1.71677	3.34852	0.00421685	3.4083	up
AT1G27460.1	74	59	61	32	37	21	17.8285	13.2511	15.1794	8.51286	9.07436	5.40915	0.00029153	-1.35495	down
AT1G27480.1	113	133	106	26	31	27	27.2246	29.8712	26.3773	6.9167	7.60284	6.95463	1.11114e-16	-2.30302	down
AT1G27740.1	6	9	3	33	56	43	1.44555	2.02136	0.746528	8.77889	13.7342	11.0759	1.71408e-05	2.4391	up
AT1G28010.1	41	30	32	15	15	19	9.87795	6.73787	7.96297	3.9904	3.6788	4.894	0.00834435	-1.29553	down
AT1G28100.4	26	34	35	12	11	0	6.26406	7.63625	8.70949	3.19232	2.69778	0	0.00506688	-2.09027	down
AT1G28130.1	60	59	63	149	164	146	14.4555	13.2511	15.6771	39.638	40.2215	37.6065	7.55852e-06	1.04709	up
AT1G28150.1	568	606	580	340	343	351	136.846	136.105	144.329	90.4491	84.1218	90.4102	2.67144e-22	-1.03398	down
AT1G28170.1	0	0	0	12	12	9	0	0	0	3.19232	2.94304	2.31821	0.000713261	3.83389	up
AT1G28230.1	5	7	6	110	136	114	1.20463	1.57217	1.49306	29.263	33.3544	29.364	1.13004e-20	3.89386	up
AT1G28290.1	229	224	229	697	750	663	55.1719	50.3094	56.985	185.421	183.94	170.775	1.6219e-31	1.34936	up
AT1G28330.1	301	370	363	99	92	87	72.5186	83.1004	90.3299	26.3367	22.5633	22.4094	1.78662e-36	-2.1547	down
AT1G28330.2	471	505	491	154	157	136	113.476	113.421	122.182	40.9681	38.5047	35.0307	1.46634e-50	-1.98215	down
AT1G28330.3	10	19	10	1	1	0	2.40926	4.26732	2.48843	0.266027	0.245253	0	0.000318625	-3.48104	down
AT1G28370.1	28	34	35	152	160	196	6.74592	7.63625	8.70949	40.4361	39.2405	50.4854	1.14097e-14	2.08487	up
AT1G28400.1	64	63	65	224	247	256	15.4192	14.1495	16.1748	59.59	60.5775	65.9402	2.7458e-16	1.63212	up
AT1G28480.1	6	7	9	37	18	38	1.44555	1.57217	2.23958	9.84299	4.41455	9.78799	0.00904307	1.68487	up
AT1G28570.1	17	13	14	68	56	50	4.09573	2.91974	3.4838	18.0898	13.7342	12.8789	0.000135565	1.65076	up
AT1G28680.1	99	106	93	420	489	492	23.8516	23.8071	23.1424	111.731	119.929	126.729	4.45497e-37	1.94902	up
AT1G28815.1	4	3	5	18	28	17	0.963702	0.673787	1.24421	4.78848	6.86708	4.37884	0.00993674	1.90183	up
AT1G29000.1	0	0	0	10	13	10	0	0	0	2.66027	3.18829	2.57579	0.000712186	3.83379	up
AT1G29025.1	9	17	19	296	343	301	2.16833	3.81813	4.72801	78.7439	84.1218	77.5312	7.1552e-49	4.04256	up
AT1G29050.1	26	42	32	181	213	207	6.26406	9.43302	7.96297	48.1509	52.2389	53.3188	5.20554e-20	2.28641	up
AT1G29070.1	3993	4234	3713	1083	1166	1036	962.016	950.938	923.953	288.107	285.965	266.852	9.84842e-297	-2.13439	down
AT1G29160.1	3	4	3	19	34	21	0.722777	0.898383	0.746528	5.05451	8.3386	5.40915	0.000998601	2.35163	up
AT1G29290.1	4	14	5	67	66	84	0.963702	3.14434	1.24421	17.8238	16.1867	21.6366	7.12692e-09	2.83563	up
AT1G29670.1	1194	1277	1089	733	758	616	287.665	286.809	270.99	194.998	185.902	158.669	7.51122e-27	-1.02836	down
AT1G29700.1	75	91	53	31	30	32	18.0694	20.4382	13.1887	8.24683	7.35759	8.24252	2.64576e-05	-1.46791	down
AT1G29860.1	2	5	9	34	43	53	0.481851	1.12298	2.23958	9.04491	10.5459	13.6517	2.02937e-05	2.5507	up
AT1G29910.1	3246	3448	3125	505	575	497	782.044	774.406	777.633	134.344	141.02	128.017	0	-2.91074	down
AT1G29920.1	3191	3617	2774	287	353	285	768.793	812.362	690.29	76.3497	86.5743	73.41	0	-3.63854	down
AT1G29930.1	45198	48683	41293	6652	6559	5366	10889.4	10934	10275.5	1769.61	1608.61	1382.17	0	-3.13213	down
AT1G29980.1	17	16	6	54	53	58	4.09573	3.59353	1.49306	14.3655	12.9984	14.9396	0.000283716	1.73853	up
AT1G30040.1	9	7	4	30	44	37	2.16833	1.57217	0.995371	7.98081	10.7911	9.53042	0.000309988	2.06142	up
AT1G30080.1	1	0	1	18	14	17	0.240926	0	0.248843	4.78848	3.43354	4.37884	0.000423199	3.36116	up
AT1G30360.1	424	423	360	164	148	146	102.152	95.004	89.5834	43.6284	36.2974	37.6065	4.54313e-29	-1.66266	down
AT1G30380.1	10904	11475	10450	1860	2021	1862	2627.05	2577.24	2600.41	494.81	495.656	479.612	0	-2.78868	down
AT1G30550.2	3	8	1	19	30	22	0.722777	1.79677	0.248843	5.05451	7.35759	5.66673	0.00734844	2.05865	up
AT1G30700.1	75	78	68	163	189	240	18.0694	17.5185	16.9213	43.3624	46.3528	61.8189	2.63601e-06	1.13605	up
AT1G30750.1	22	22	29	84	94	96	5.30036	4.9411	7.21644	22.3463	23.0538	24.7276	1.70883e-06	1.59608	up
AT1G30820.1	176	185	178	52	60	36	42.4029	41.5502	44.294	13.8334	14.7152	9.27284	3.19338e-19	-2.11774	down
AT1G30840.1	16	11	19	61	89	71	3.85481	2.47055	4.72801	16.2276	21.8275	18.2881	2.73489e-06	1.91504	up
AT1G30850.1	3	1	2	22	13	18	0.722777	0.224596	0.497685	5.85259	3.18829	4.63642	0.0036669	2.462	up
AT1G30870.1	26	28	22	238	282	339	6.26406	6.28868	5.47454	63.3144	69.1613	87.3192	1.00259e-34	3.18021	up
AT1G30900.1	8	8	8	82	103	106	1.9274	1.79677	1.99074	21.8142	25.2611	27.3034	4.04915e-15	3.20776	up
AT1G31190.1	115	103	93	51	55	45	27.7064	23.1334	23.1424	13.5674	13.4889	11.591	1.48269e-06	-1.30078	down
AT1G31320.1	7	0	2	26	31	36	1.68648	0	0.497685	6.9167	7.60284	9.27284	0.000379184	2.715	up
AT1G31330.1	13584	13971	12038	2183	2285	2025	3272.73	3137.83	2995.57	580.737	560.403	521.597	0	-2.88012	down
AT1G31770.1	61	59	63	200	230	228	14.6965	13.2511	15.6771	53.2054	56.4082	58.728	6.94212e-14	1.55602	up
AT1G31800.1	176	224	171	80	97	98	42.4029	50.3094	42.5521	21.2821	23.7895	25.2427	9.59082e-11	-1.31447	down
AT1G31885.1	5	6	5	51	35	64	1.20463	1.34757	1.24421	13.5674	8.58386	16.485	6.1362e-07	2.77848	up
AT1G31920.1	45	42	32	18	13	10	10.8416	9.43302	7.96297	4.78848	3.18829	2.57579	0.000318785	-1.73192	down
AT1G32060.1	1778	1881	1531	269	275	259	428.366	422.464	380.978	71.5612	67.4446	66.7129	7.54045e-213	-2.95891	down
AT1G32070.3	0	2	2	20	21	14	0	0.449191	0.497685	5.32054	5.15031	3.6061	0.00089454	2.92261	up
AT1G32080.1	317	331	223	42	54	57	76.3734	74.3412	55.4919	11.1731	13.2437	14.682	9.57815e-35	-2.75138	down
AT1G32200.1	124	144	116	72	78	65	29.8748	32.3418	28.8658	19.1539	19.1297	16.7426	2.28356e-06	-1.09824	down
AT1G32200.2	45	49	33	21	17	15	10.8416	11.0052	8.21181	5.58656	4.1693	3.86368	0.000951955	-1.47527	down
AT1G32220.1	114	102	104	55	39	50	27.4655	22.9088	25.8796	14.6315	9.56487	12.8789	7.799e-07	-1.40276	down
AT1G32450.1	87	66	93	233	270	226	20.9605	14.8233	23.1424	61.9843	66.2183	58.2128	6.94696e-09	1.27253	up
AT1G32470.1	1522	1706	1354	314	358	310	366.689	383.16	336.933	83.5324	87.8006	79.8494	1.16533e-153	-2.49012	down
AT1G32520.1	47	56	36	17	22	26	11.3235	12.5774	8.95834	4.52246	5.39557	6.69705	0.00202856	-1.32287	down
AT1G32540.1	33	41	42	7	8	8	7.95054	9.20842	10.4514	1.86219	1.96202	2.06063	7.05172e-07	-2.48062	down
AT1G32540.2	118	98	101	15	21	20	28.4292	22.0104	25.1331	3.9904	5.15031	5.15158	3.29819e-17	-2.72139	down
AT1G32540.3	10	10	14	0	2	0	2.40926	2.24596	3.4838	0	0.490506	0	0.00109657	-3.28691	down
AT1G32550.1	226	258	211	91	93	64	54.4492	57.9457	52.5058	24.2084	22.8085	16.485	8.12283e-18	-1.74488	down
AT1G32560.1	27	12	26	7	2	2	6.50499	2.69515	6.46991	1.86219	0.490506	0.515158	0.00106249	-2.5158	down
AT1G32690.1	26	22	23	58	59	62	6.26406	4.9411	5.72338	15.4296	14.4699	15.9699	0.00838647	1.03178	up
AT1G32920.1	781	856	773	339	332	343	188.163	192.254	192.355	90.1831	81.424	88.3495	1.07549e-54	-1.51867	down
AT1G32928.1	648	686	667	132	126	165	156.12	154.073	165.978	35.1155	30.9019	42.5005	3.56922e-73	-2.50491	down
AT1G32940.1	3	5	13	82	85	80	0.722777	1.12298	3.23496	21.8142	20.8465	20.6063	8.17026e-11	3.11887	up
AT1G32990.1	915	973	785	288	320	326	220.447	218.532	195.342	76.6157	78.481	83.9707	3.81031e-62	-1.78527	down
AT1G33030.1	49	53	28	145	139	118	11.8054	11.9036	6.9676	38.5739	34.0902	30.3943	9.84158e-06	1.33779	up
AT1G33060.1	0	0	0	52	75	40	0	0	0	13.8334	18.394	10.3032	1.45947e-10	5.94562	up
AT1G33260.1	0	1	1	44	52	43	0	0.224596	0.248843	11.7052	12.7532	11.0759	9.65124e-10	4.83361	up
AT1G33560.1	36	38	32	83	96	95	8.67332	8.53463	7.96297	22.0802	23.5443	24.47	0.000474207	1.07778	up
AT1G33600.1	305	350	292	116	160	95	73.4823	78.6085	72.6621	30.8591	39.2405	24.47	3.94162e-17	-1.61715	down
AT1G33750.1	2	2	4	27	44	48	0.481851	0.449191	0.995371	7.18273	10.7911	12.3638	7.38944e-07	3.27473	up
AT1G33800.1	28	40	28	270	373	330	6.74592	8.98383	6.9676	71.8273	91.4794	85.001	6.86475e-39	3.03196	up
AT1G33810.1	336	347	337	195	193	166	80.951	77.9347	83.86	51.8752	47.3338	42.7581	2.51731e-15	-1.15068	down
AT1G33811.1	315	292	277	173	190	156	75.8915	65.5819	68.9294	46.0226	46.5981	40.1823	6.31268e-11	-1.04008	down
AT1G34000.1	901	943	811	293	317	292	217.074	211.794	201.811	77.9459	77.7452	75.213	7.70238e-77	-1.82762	down
AT1G34040.1	4	7	4	67	73	99	0.963702	1.57217	0.995371	17.8238	17.9035	25.5003	9.21216e-13	3.53215	up
AT1G34060.1	1	1	0	114	121	170	0.240926	0.224596	0	30.3271	29.6756	43.7884	9.49818e-19	6.27945	up
AT1G34180.1	17	4	14	53	49	51	4.09573	0.898383	3.4838	14.0994	12.0174	13.1365	0.00150461	1.74018	up
AT1G34510.1	7	2	4	80	75	99	1.68648	0.449191	0.995371	21.2821	18.394	25.5003	7.56971e-14	3.7883	up
AT1G34540.1	0	0	0	9	21	9	0	0	0	2.39424	5.15031	2.31821	0.00036531	3.98506	up
AT1G34670.1	0	0	0	8	9	11	0	0	0	2.12821	2.20728	2.83337	0.00185749	3.61303	up
AT1G34750.1	66	64	66	159	221	206	15.9011	14.3741	16.4236	42.2983	54.2009	53.0612	1.81681e-08	1.2878	up
AT1G35140.1	97	59	65	21	25	28	23.3698	13.2511	16.1748	5.58656	6.13133	7.21221	2.06146e-06	-1.80946	down
AT1G35210.1	55	62	47	159	156	200	13.2509	13.9249	11.6956	42.2983	38.2595	51.5158	4.97342e-08	1.36508	up
AT1G35230.1	6	8	6	41	48	75	1.44555	1.79677	1.49306	10.9071	11.7721	19.3184	6.91424e-07	2.61366	up
AT1G35250.1	2	5	4	31	27	31	0.481851	1.12298	0.995371	8.24683	6.62183	7.98494	0.000128249	2.51688	up
AT1G35290.1	5	3	3	30	53	56	1.20463	0.673787	0.746528	7.98081	12.9984	14.4244	2.91114e-07	3.11748	up
AT1G35310.1	1	2	1	77	103	110	0.240926	0.449191	0.248843	20.4841	25.2611	28.3337	1.81736e-16	5.28757	up
AT1G35340.4	79	93	114	39	42	29	19.0331	20.8874	28.3681	10.375	10.3006	7.46979	3.01341e-07	-1.6258	down
AT1G35516.1	63	69	68	34	29	39	15.1783	15.4971	16.9213	9.04491	7.11234	10.0456	0.000321346	-1.218	down
AT1G35680.1	887	896	785	290	290	248	213.701	201.238	195.342	77.1478	71.1234	63.8795	3.42504e-67	-1.90209	down
AT1G35720.1	201	195	183	806	863	860	48.426	43.7962	45.5382	214.418	211.653	221.518	3.74948e-61	1.84731	up
AT1G35910.1	0	0	2	13	17	17	0	0	0.497685	3.45835	4.1693	4.37884	0.000878026	3.25918	up
AT1G36070.1	31	19	11	78	86	69	7.46869	4.26732	2.73727	20.7501	21.0918	17.7729	0.000188808	1.60134	up
AT1G37130.1	5708	6499	5415	1308	1498	1322	1375.2	1459.65	1347.48	347.963	367.389	340.519	0	-2.36541	down
AT1G41830.1	38	54	46	177	181	154	9.15517	12.1282	11.4468	47.0868	44.3908	39.6671	5.40388e-11	1.60084	up
AT1G42550.1	228	228	203	60	102	69	54.931	51.2078	50.5151	15.9616	25.0158	17.7729	6.88347e-16	-1.77564	down
AT1G42970.1	2001	2188	1633	361	427	374	482.092	491.415	406.36	96.0357	104.723	96.3345	5.90376e-142	-2.59154	down
AT1G43020.1	1	1	2	26	19	26	0.240926	0.224596	0.497685	6.9167	4.65981	6.69705	4.86264e-05	3.30175	up
AT1G43160.1	15	26	26	71	71	90	3.61388	5.83949	6.46991	18.8879	17.413	23.1821	0.000115394	1.48139	up
AT1G43560.1	608	622	545	231	287	234	146.483	139.698	135.619	61.4522	70.3876	60.2734	3.30201e-36	-1.5107	down
AT1G43620.1	20	16	16	62	46	59	4.81851	3.59353	3.98148	16.4937	11.2816	15.1971	0.00166605	1.36592	up
AT1G43670.1	752	847	628	121	148	145	181.176	190.233	156.273	32.1892	36.2974	37.3489	5.15809e-84	-2.6881	down
AT1G43800.1	1	0	0	78	185	255	0.240926	0	0	20.7501	45.3718	65.6826	3.3981e-18	6.82996	up
AT1G43910.1	5	6	5	228	253	255	1.20463	1.34757	1.24421	60.6541	62.049	65.6826	2.77607e-39	5.07362	up
AT1G44000.1	213	220	153	96	112	95	51.3171	49.411	38.0729	25.5386	27.4683	24.47	1.2427e-08	-1.21352	down
AT1G44010.1	0	0	0	11	11	8	0	0	0	2.9263	2.69778	2.06063	0.00126795	3.70378	up
AT1G44160.1	11	7	8	67	76	76	2.65018	1.57217	1.99074	17.8238	18.6392	19.576	3.97642e-10	2.69147	up
AT1G44350.1	61	53	70	21	16	23	14.6965	11.9036	17.419	5.58656	3.92405	5.92431	2.36029e-06	-1.83893	down
AT1G44575.1	1534	1757	1422	490	566	528	369.58	394.615	353.854	130.353	138.813	136.002	2.98565e-108	-1.84299	down
AT1G44800.1	164	166	169	828	923	822	39.5118	37.2829	42.0544	220.27	226.369	211.73	8.19956e-74	2.08432	up
AT1G44920.1	293	306	261	97	116	99	70.5912	68.7263	64.9479	25.8046	28.4493	25.5003	1.66786e-25	-1.72795	down
AT1G44970.1	8	9	11	54	105	80	1.9274	2.02136	2.73727	14.3655	25.7516	20.6063	2.25278e-09	2.69363	up
AT1G45010.1	24	23	21	86	93	98	5.78221	5.1657	5.2257	22.8783	22.8085	25.2427	1.50701e-07	1.71611	up
AT1G45145.1	169	177	133	405	495	616	40.7164	39.7534	33.0961	107.741	121.4	158.669	4.75677e-13	1.3803	up
AT1G45163.1	70	75	68	38	39	36	16.8648	16.8447	16.9213	10.109	9.56487	9.27284	0.000183196	-1.16783	down
AT1G45201.1	129	108	112	382	395	352	31.0794	24.2563	27.8704	101.622	96.8749	90.6677	1.21568e-17	1.40903	up
AT1G45230.1	134	146	107	64	49	58	32.284	32.791	26.6262	17.0257	12.0174	14.9396	3.92509e-08	-1.42695	down
AT1G45474.1	259	298	242	90	92	96	62.3997	66.9295	60.2199	23.9424	22.5633	24.7276	5.38447e-25	-1.78344	down
AT1G45474.2	290	331	237	105	130	114	69.8684	74.3412	58.9757	27.9328	31.8829	29.364	2.13505e-18	-1.55978	down
AT1G46768.1	44	57	38	21	23	13	10.6007	12.802	9.45602	5.58656	5.64082	3.34852	0.000615694	-1.50341	down
AT1G47128.1	1384	1575	1286	5668	6211	6238	333.441	353.738	320.012	1507.84	1523.27	1606.78	2.43897e-196	1.81988	up
AT1G47395.1	1	0	1	12	8	19	0.240926	0	0.248843	3.19232	1.96202	4.894	0.00337329	3.00255	up
AT1G47480.1	16	14	19	94	98	109	3.85481	3.14434	4.72801	25.0065	24.0348	28.0761	4.67139e-11	2.2857	up
AT1G47510.1	0	1	1	14	12	17	0	0.224596	0.248843	3.72438	2.94304	4.37884	0.00119569	3.18441	up
AT1G47580.1	108	116	103	18	26	11	26.02	26.0531	25.6308	4.78848	6.37658	2.83337	7.95724e-17	-2.78498	down
AT1G47600.1	25	23	24	158	186	170	6.02314	5.1657	5.97222	42.0322	45.6171	43.7884	6.35578e-21	2.52062	up
AT1G47740.2	1	1	3	25	19	32	0.240926	0.224596	0.746528	6.65067	4.65981	8.24252	6.72045e-05	3.15413	up
AT1G47840.1	21	17	19	122	113	109	5.05944	3.81813	4.72801	32.4553	27.7136	28.0761	1.58945e-12	2.27026	up
AT1G48000.1	1	1	3	17	18	10	0.240926	0.224596	0.746528	4.52246	4.41455	2.57579	0.00824463	2.40931	up
AT1G48320.1	101	106	76	231	223	257	24.3335	23.8071	18.912	61.4522	54.6914	66.1978	4.07332e-07	1.05089	up
AT1G48330.1	30	23	25	70	65	72	7.22777	5.1657	6.22107	18.6219	15.9414	18.5457	0.00293093	1.10612	up
AT1G48350.1	2178	2341	1995	778	858	786	524.736	525.778	496.441	206.969	210.427	202.457	6.46006e-139	-1.69936	down
AT1G48500.2	3	5	6	45	38	24	0.722777	1.12298	1.49306	11.9712	9.31961	6.18189	8.83556e-05	2.45753	up
AT1G48510.1	0	1	1	9	13	12	0	0.224596	0.248843	2.39424	3.18829	3.09095	0.00596144	2.85401	up
AT1G48520.2	212	202	197	129	87	97	51.0762	45.3683	49.022	34.3175	21.337	24.9851	5.36052e-08	-1.22364	down
AT1G48570.1	61	93	55	22	34	29	14.6965	20.8874	13.6863	5.85259	8.3386	7.46979	3.73733e-05	-1.5271	down
AT1G48600.1	116	138	134	408	486	479	27.9474	30.9942	33.3449	108.539	119.193	123.38	1.02711e-24	1.54092	up
AT1G48690.1	4	2	2	16	17	19	0.963702	0.449191	0.497685	4.25643	4.1693	4.894	0.00854241	2.12891	up
AT1G48930.1	10	8	6	85	92	106	2.40926	1.79677	1.49306	22.6123	22.5633	27.3034	2.26503e-14	3.16826	up
AT1G49010.1	72	31	32	11	18	4	17.3466	6.96247	7.96297	2.9263	4.41455	1.03032	0.000437003	-2.16508	down
AT1G49130.2	71	72	83	4	8	5	17.1057	16.1709	20.6539	1.06411	1.96202	1.28789	4.04636e-17	-3.83477	down
AT1G49160.1	8	9	5	0	0	1	1.9274	2.02136	1.24421	0	0	0.257579	0.00637435	-3.08074	down
AT1G49200.1	23	25	21	5	8	1	5.54129	5.61489	5.2257	1.33013	1.96202	0.257579	0.000769624	-2.34462	down
AT1G49310.1	10	13	9	62	50	45	2.40926	2.91974	2.23958	16.4937	12.2627	11.591	3.12397e-05	1.94438	up
AT1G49380.1	55	68	54	23	20	9	13.2509	15.2725	13.4375	6.11862	4.90506	2.31821	4.20574e-06	-1.9674	down
AT1G49500.1	2120	2276	2142	49	28	13	510.762	511.18	533.021	13.0353	6.86708	3.34852	3.643e-40	-6.14497	down
AT1G49510.1	126	158	141	71	88	72	30.3566	35.4861	35.0868	18.8879	21.5823	18.5457	3.62625e-07	-1.1432	down
AT1G49570.1	0	4	2	60	57	55	0	0.898383	0.497685	15.9616	13.9794	14.1668	8.23789e-11	4.14755	up
AT1G49650.1	75	89	53	33	37	22	18.0694	19.989	13.1887	8.77889	9.07436	5.66673	6.83208e-05	-1.47067	down
AT1G49660.1	201	202	215	491	521	508	48.426	45.3683	53.5012	130.619	127.777	130.85	2.90582e-15	1.01907	up
AT1G49730.1	61	62	66	27	32	32	14.6965	13.9249	16.4236	7.18273	7.8481	8.24252	0.000132472	-1.30389	down
AT1G49750.1	170	158	151	80	86	86	40.9573	35.4861	37.5752	21.2821	21.0918	22.1518	1.17098e-08	-1.19239	down
AT1G49860.1	2	11	5	81	76	79	0.481851	2.47055	1.24421	21.5482	18.6392	20.3487	1.94043e-11	3.27957	up
AT1G49960.1	0	1	0	17	23	24	0	0.224596	0	4.52246	5.64082	6.18189	1.49906e-05	4.15171	up
AT1G49975.1	318	276	258	99	104	94	76.6143	61.9884	64.2014	26.3367	25.5063	24.2124	3.20819e-23	-1.78509	down
AT1G50040.1	26	26	22	10	4	0	6.26406	5.83949	5.47454	2.66027	0.981012	0	0.00253947	-2.35802	down
AT1G50060.1	7	7	9	91	154	128	1.68648	1.57217	2.23958	24.2084	37.769	32.9701	2.80776e-18	3.6013	up
AT1G50250.1	282	303	244	114	109	113	67.941	68.0525	60.7176	30.3271	26.7326	29.1064	1.59106e-20	-1.56509	down
AT1G50560.1	15	15	19	44	55	46	3.61388	3.36893	4.72801	11.7052	13.4889	11.8486	0.00554959	1.24201	up
AT1G50580.1	0	0	0	9	15	6	0	0	0	2.39424	3.6788	1.54547	0.0016133	3.65199	up
AT1G50732.1	118	159	121	17	26	32	28.4292	35.7107	30.11	4.52246	6.37658	8.24252	2.89003e-18	-2.62837	down
AT1G50900.1	1237	1281	1093	400	462	361	298.025	287.707	271.985	106.411	113.307	92.9859	3.13142e-75	-1.83341	down
AT1G51060.1	369	406	405	1146	1176	1143	88.9015	91.1858	100.781	304.867	288.418	294.413	6.14973e-45	1.27761	up
AT1G51110.1	153	153	131	44	54	52	36.8616	34.3631	32.5984	11.7052	13.2437	13.3941	1.99645e-14	-1.79768	down
AT1G51170.1	18	11	18	73	76	75	4.33666	2.47055	4.47917	19.42	18.6392	19.3184	9.919e-07	1.91415	up
AT1G51310.1	49	41	40	18	25	23	11.8054	9.20842	9.95371	4.78848	6.13133	5.92431	0.00413842	-1.2194	down
AT1G51400.1	2385	2492	2184	398	442	384	574.607	559.692	543.472	105.879	108.402	98.9103	3.38399e-296	-2.7993	down
AT1G51580.1	68	82	91	50	48	43	16.3829	18.4168	22.6447	13.3013	11.7721	11.0759	0.000896257	-1.03096	down
AT1G51590.1	51	83	34	12	19	10	12.2872	18.6414	8.46065	3.19232	4.65981	2.57579	6.0832e-06	-2.19575	down
AT1G51760.1	161	181	170	377	474	433	38.789	40.6518	42.3033	100.292	116.25	111.532	5.0718e-13	1.04587	up
AT1G51913.1	54	38	39	163	137	193	13.01	8.53463	9.70487	43.3624	33.5997	49.7127	2.49814e-08	1.61219	up
AT1G51940.1	125	136	115	77	85	62	30.1157	30.545	28.6169	20.4841	20.8465	15.9699	2.80256e-05	-1.01099	down
AT1G52050.1	5	8	5	82	101	82	1.20463	1.79677	1.24421	21.8142	24.7706	21.1215	1.02836e-14	3.45416	up
AT1G52060.1	2	0	0	28	40	24	0.481851	0	0	7.44875	9.81012	6.18189	9.35709e-07	4.20927	up
AT1G52070.1	12	12	12	180	201	186	2.89111	2.69515	2.98611	47.8848	49.2959	47.9097	3.5543e-31	3.62504	up
AT1G52220.1	1194	1297	1147	352	389	354	287.665	291.301	285.423	93.6415	95.4034	91.1829	1.01569e-124	-2.00326	down
AT1G52230.1	6502	6870	6012	1580	1736	1600	1566.5	1542.97	1496.04	420.322	425.759	412.126	0	-2.25225	down
AT1G52710.2	33	18	19	57	77	73	7.95054	4.04272	4.72801	15.1635	18.8845	18.8033	0.00303807	1.24266	up
AT1G52800.1	5	0	3	15	30	30	1.20463	0	0.746528	3.9904	7.35759	7.72736	0.00172457	2.5457	up
AT1G52880.1	19	30	22	79	68	79	4.57759	6.73787	5.47454	21.0161	16.6772	20.3487	0.000188545	1.37078	up
AT1G52910.1	32	28	57	144	168	154	7.70962	6.28868	14.184	38.3079	41.2025	39.6671	1.5448e-07	1.67468	up
AT1G53035.1	49	50	56	140	156	154	11.8054	11.2298	13.9352	37.2438	38.2595	39.6671	2.88936e-07	1.24698	up
AT1G53070.1	7	4	8	29	43	34	1.68648	0.898383	1.99074	7.71478	10.5459	8.75768	0.000443509	2.05343	up
AT1G53210.1	1376	1489	1389	832	851	773	331.514	334.423	345.643	221.334	208.71	199.108	5.11261e-48	-1.06543	down
AT1G53310.2	229	269	212	673	734	767	55.1719	60.4162	52.7547	179.036	180.016	197.563	4.87213e-29	1.33889	up
AT1G53380.2	6	7	6	40	45	29	1.44555	1.57217	1.49306	10.6411	11.0364	7.46979	0.000104334	2.17212	up
AT1G53560.1	423	452	385	180	195	203	101.912	101.517	95.8044	47.8848	47.8243	52.2885	7.44151e-26	-1.39233	down
AT1G53625.1	56	66	78	133	155	224	13.4918	14.8233	19.4097	35.3816	38.0142	57.6977	0.000410457	1.0639	up
AT1G53670.1	492	507	477	180	180	167	118.535	113.87	118.698	47.8848	44.1455	43.0157	3.34327e-44	-1.75446	down
AT1G53680.1	3	0	0	11	13	19	0.722777	0	0	2.9263	3.18829	4.894	0.00649482	2.75243	up
AT1G53700.1	15	12	10	53	68	47	3.61388	2.69515	2.48843	14.0994	16.6772	12.1062	4.23298e-05	1.83258	up
AT1G54000.1	87	107	109	867	992	855	20.9605	24.0317	27.1239	230.645	243.291	220.23	1.58613e-103	2.8764	up
AT1G54100.2	499	594	486	203	289	268	120.222	133.41	120.938	54.0035	70.8781	69.0311	1.21468e-20	-1.32414	down
AT1G54217.2	4	1	3	20	23	34	0.963702	0.224596	0.746528	5.32054	5.64082	8.75768	0.000387445	2.6502	up
AT1G54410.1	17630	18795	16553	10046	11045	10788	4247.52	4221.28	4119.09	2672.51	2708.82	2778.76	2.13995e-139	-1.00632	down
AT1G54500.1	924	898	749	305	300	300	222.615	201.687	186.383	81.1382	73.5759	77.2736	3.92253e-54	-1.77437	down
AT1G54520.1	224	268	210	93	112	101	53.9673	60.1916	52.257	24.7405	27.4683	26.0155	4.9744e-16	-1.46084	down
AT1G54540.1	1	5	0	20	43	39	0.240926	1.12298	0	5.32054	10.5459	10.0456	1.82197e-05	3.32481	up
AT1G54570.1	26	24	26	86	102	114	6.26406	5.3903	6.46991	22.8783	25.0158	29.364	1.88351e-07	1.67975	up
AT1G54740.1	208	213	233	44	44	43	50.1125	47.8389	57.9803	11.7052	10.7911	11.0759	1.73543e-32	-2.57084	down
AT1G54780.1	1481	1580	1274	381	385	334	356.811	354.861	317.026	101.356	94.4224	86.0313	7.84667e-116	-2.2462	down
AT1G54890.1	1	1	1	11	23	14	0.240926	0.224596	0.248843	2.9263	5.64082	3.6061	0.00130677	2.9913	up
AT1G54970.1	18	12	13	221	243	259	4.33666	2.69515	3.23496	58.7919	59.5965	66.7129	2.1622e-37	3.72663	up
AT1G54990.1	30	32	41	111	110	108	7.22777	7.18706	10.2026	29.529	26.9778	27.8185	4.13426e-06	1.37582	up
AT1G55000.1	326	381	333	207	184	210	78.5417	85.5709	82.8646	55.0676	45.1266	54.0915	9.19442e-13	-1.05678	down
AT1G55020.1	32	18	19	99	80	86	7.70962	4.04272	4.72801	26.3367	19.6202	22.1518	1.8093e-05	1.62136	up
AT1G55210.1	77	83	78	345	376	404	18.5513	18.6414	19.4097	91.7793	92.2151	104.062	2.35574e-30	1.95515	up
AT1G55210.2	3	1	0	25	17	21	0.722777	0.224596	0	6.65067	4.1693	5.40915	0.000324732	3.0995	up
AT1G55265.1	35	32	43	216	255	245	8.43239	7.18706	10.7002	57.4618	62.5395	63.1068	9.77985e-25	2.39622	up
AT1G55310.3	65	94	55	32	28	28	15.6602	21.112	13.6863	8.51286	6.86708	7.21221	2.40682e-05	-1.50891	down
AT1G55320.1	5	13	11	44	41	50	1.20463	2.91974	2.73727	11.7052	10.0554	12.8789	0.000333645	1.85752	up
AT1G55370.1	74	51	59	16	15	13	17.8285	11.4544	14.6817	4.25643	3.6788	3.34852	2.45552e-08	-2.26834	down
AT1G55370.2	6	42	14	0	2	3	1.44555	9.43302	3.4838	0	0.490506	0.772736	0.000692516	-3.14195	down
AT1G55480.1	392	436	317	98	122	106	94.4428	97.9237	78.8831	26.0706	29.9209	27.3034	2.96643e-35	-2.07272	down
AT1G55490.2	118	142	140	51	60	60	28.4292	31.8926	34.838	13.5674	14.7152	15.4547	5.22118e-10	-1.48417	down
AT1G55510.1	51	79	57	24	41	37	12.2872	17.7431	14.184	6.38464	10.0554	9.53042	0.00348612	-1.11835	down
AT1G55670.1	14091	14196	13028	1974	2136	1842	3394.88	3188.36	3241.92	525.137	523.86	474.46	0	-3.06892	down
AT1G55760.1	14	11	17	251	309	334	3.37296	2.47055	4.23033	66.7727	75.7832	86.0313	6.30112e-44	4.05785	up
AT1G55805.1	302	330	277	143	178	164	72.7595	74.1166	68.9294	38.0418	43.655	42.2429	1.55381e-14	-1.1753	down
AT1G55810.1	78	86	82	25	20	26	18.7922	19.3152	20.4051	6.65067	4.90506	6.69705	4.58371e-10	-2.02145	down
AT1G55810.2	23	24	16	9	4	2	5.54129	5.3903	3.98148	2.39424	0.981012	0.515158	0.00332803	-2.11208	down
AT1G55810.3	103	123	102	35	30	36	24.8153	27.6253	25.382	9.31094	7.35759	9.27284	2.8009e-12	-1.93871	down
AT1G55910.1	35	47	35	109	122	142	8.43239	10.556	8.70949	28.9969	29.9209	36.5762	1.3434e-06	1.38131	up
AT1G56010.2	53	56	53	172	179	176	12.7691	12.5774	13.1887	45.7566	43.9003	45.3339	2.00714e-10	1.41402	up
AT1G56080.1	18	16	14	68	78	67	4.33666	3.59353	3.4838	18.0898	19.1297	17.2578	1.66668e-06	1.82198	up
AT1G56220.2	1267	587	151	0	0	0	305.253	131.838	37.5752	0	0	0	2.05448e-15	-7.62093	down
AT1G56220.3	3235	1975	4165	1309	673	238	779.394	443.576	1036.43	348.229	165.055	61.3038	0.00371071	-2.12996	down
AT1G56220.4	137	406	466	0	0	0	33.0068	91.1858	115.961	0	0	0	2.30889e-20	-8.04836	down
AT1G56280.1	143	192	203	91	40	21	34.4524	43.1224	50.5151	24.2084	9.81012	5.40915	3.42772e-06	-2.01187	down
AT1G56320.1	1	7	4	49	59	64	0.240926	1.57217	0.995371	13.0353	14.4699	16.485	3.48258e-09	3.33473	up
AT1G56430.1	2	1	0	12	17	15	0.481851	0.224596	0	3.19232	4.1693	3.86368	0.00256432	2.87322	up
AT1G56550.1	4	13	10	36	44	34	0.963702	2.91974	2.48843	9.57697	10.7911	8.75768	0.00260221	1.70678	up
AT1G56600.1	2	2	1	21	20	29	0.481851	0.449191	0.248843	5.58656	4.90506	7.46979	0.000109251	3.062	up
AT1G56660.1	45	42	53	127	110	146	10.8416	9.43302	13.1887	33.7854	26.9778	37.6065	7.29825e-05	1.15946	up
AT1G56680.1	0	0	0	8	9	6	0	0	0	2.12821	2.20728	1.54547	0.00521826	3.34428	up
AT1G57560.1	0	0	0	22	25	20	0	0	0	5.85259	6.13133	5.15158	2.88248e-06	4.78975	up
AT1G57770.1	33	26	26	4	5	3	7.95054	5.83949	6.46991	1.06411	1.22627	0.772736	3.7563e-06	-2.86307	down
AT1G58080.1	326	348	321	143	170	140	78.5417	78.1593	79.8785	38.0418	41.693	36.061	1.009e-21	-1.40491	down
AT1G58170.1	1	1	0	18	20	24	0.240926	0.224596	0	4.78848	4.90506	6.18189	4.59934e-05	3.69963	up
AT1G58180.3	164	193	167	104	91	42	39.5118	43.347	41.5567	27.6668	22.318	10.8183	1.04807e-05	-1.39113	down
AT1G58290.1	463	480	391	205	164	170	111.549	107.806	97.2975	54.5355	40.2215	43.7884	6.20237e-24	-1.56917	down
AT1G59171.1	0	0	0	8	7	16	0	0	0	2.12821	1.71677	4.12126	0.00131825	3.7016	up
AT1G59730.1	0	1	0	6	9	20	0	0.224596	0	1.59616	2.20728	5.15158	0.00344533	3.22788	up
AT1G59740.1	33	29	22	71	65	77	7.95054	6.51327	5.47454	18.8879	15.9414	19.8336	0.00506756	1.04654	up
AT1G59840.1	30	27	23	6	9	8	7.22777	6.06408	5.72338	1.59616	2.20728	2.06063	0.000624161	-1.95255	down
AT1G59840.2	28	41	32	7	9	7	6.74592	9.20842	7.96297	1.86219	2.20728	1.80305	1.5559e-05	-2.27735	down
AT1G59940.1	6	8	4	72	52	49	1.44555	1.79677	0.995371	19.1539	12.7532	12.6214	3.80318e-08	2.83833	up
AT1G59970.1	25	22	20	58	79	56	6.02314	4.9411	4.97685	15.4296	19.375	14.4244	0.00202371	1.21344	up
AT1G60000.1	363	409	353	175	164	152	87.456	91.8596	87.8415	46.5547	40.2215	39.152	1.06871e-24	-1.4619	down
AT1G60110.1	8	8	7	47	45	58	1.9274	1.79677	1.7419	12.5033	11.0364	14.9396	2.50936e-06	2.31899	up
AT1G60140.1	198	211	155	55	70	53	47.7033	47.3897	38.5706	14.6315	17.1677	13.6517	1.42478e-17	-1.91792	down
AT1G60160.1	79	95	62	43	37	37	19.0331	21.3366	15.4282	11.4392	9.07436	9.53042	0.00010296	-1.25488	down
AT1G60390.1	7	1	3	44	38	34	1.68648	0.224596	0.746528	11.7052	9.31961	8.75768	1.17323e-05	2.8474	up
AT1G60470.1	0	0	0	9	19	18	0	0	0	2.39424	4.65981	4.63642	9.56037e-05	4.23795	up
AT1G60550.1	169	169	124	68	72	84	40.7164	37.9567	30.8565	18.0898	17.6582	21.6366	4.45862e-08	-1.30137	down
AT1G60680.1	42	43	44	248	288	303	10.1189	9.65761	10.9491	65.9747	70.6329	78.0464	1.42743e-29	2.4029	up
AT1G60800.1	91	79	70	57	34	44	21.9242	17.7431	17.419	15.1635	8.3386	11.3335	0.00206379	-1.07601	down
AT1G60950.1	1482	1640	1319	296	293	253	357.052	368.337	328.224	78.7439	71.8591	65.1674	3.00327e-155	-2.66493	down
AT1G60960.1	79	108	86	239	219	239	19.0331	24.2563	21.4005	63.5804	53.7104	61.5613	1.04864e-07	1.07556	up
AT1G60970.1	1	2	5	34	44	46	0.240926	0.449191	1.24421	9.04491	10.7911	11.8486	3.11758e-07	3.33785	up
AT1G61050.1	3	5	2	31	38	49	0.722777	1.12298	0.497685	8.24683	9.31961	12.6214	1.65922e-06	3.02198	up
AT1G61100.2	75	92	187	66	28	50	18.0694	20.6628	46.5336	17.5578	6.86708	12.8789	0.00111493	-1.5121	down
AT1G61260.1	11	19	12	44	51	65	2.65018	4.26732	2.98611	11.7052	12.5079	16.7426	0.000532737	1.59988	up
AT1G61450.1	3	3	2	21	16	20	0.722777	0.673787	0.497685	5.58656	3.92405	5.15158	0.00369172	2.26852	up
AT1G61520.1	13132	13997	11925	2371	2544	2291	3163.83	3143.67	2967.45	630.75	623.924	590.113	0	-2.71023	down
AT1G61520.2	29	38	29	11	14	16	6.98684	8.53463	7.21644	2.9263	3.43354	4.12126	0.00427257	-1.43388	down
AT1G61740.1	690	692	675	431	447	359	166.239	155.42	167.969	114.658	109.628	92.4708	1.02554e-18	-1.00719	down
AT1G61790.1	18	35	26	371	442	419	4.33666	7.86085	6.46991	98.696	108.402	107.926	2.24731e-58	3.65037	up
AT1G61800.1	14	9	12	358	439	507	3.37296	2.02136	2.98611	95.2376	107.666	130.592	2.19383e-59	4.84643	up
AT1G61930.1	2	2	3	50	64	78	0.481851	0.449191	0.746528	13.3013	15.6962	20.0911	1.05166e-11	4.12496	up
AT1G62262.1	0	0	0	10	25	20	0	0	0	2.66027	6.13133	5.15158	2.75261e-05	4.45753	up
AT1G62290.2	181	212	206	112	105	105	43.6075	47.6143	51.2616	29.795	25.7516	27.0458	7.18342e-10	-1.16029	down
AT1G62370.1	4	4	4	16	30	25	0.963702	0.898383	0.995371	4.25643	7.35759	6.43947	0.00332085	2.07375	up
AT1G62480.1	5762	6095	6452	2803	2907	2762	1388.21	1368.91	1605.53	745.673	712.95	711.433	5.53721e-101	-1.3868	down
AT1G62510.1	2107	2125	1897	78	86	84	507.63	477.266	472.055	20.7501	21.0918	21.6366	0	-4.88731	down
AT1G62560.1	11	15	17	92	107	132	2.65018	3.36893	4.23033	24.4745	26.2421	34.0004	9.70778e-13	2.59842	up
AT1G62570.1	50	67	60	133	149	152	12.0463	15.0479	14.9306	35.3816	36.5427	39.152	4.14521e-05	1.01021	up
AT1G62750.1	440	468	393	119	112	121	106.007	105.111	97.7952	31.6572	27.4683	31.167	5.49624e-49	-2.14807	down
AT1G62770.1	314	280	394	155	164	131	75.6506	62.8868	98.044	41.2342	40.2215	33.7428	2.85928e-12	-1.40618	down
AT1G62780.1	163	218	169	57	75	52	39.2709	48.9619	42.0544	15.1635	18.394	13.3941	7.67466e-16	-1.83343	down
AT1G62790.1	145	158	127	356	411	399	34.9342	35.4861	31.603	94.7056	100.799	102.774	1.08807e-14	1.16038	up
AT1G62840.1	12	23	12	44	52	64	2.89111	5.1657	2.98611	11.7052	12.7532	16.485	0.00206428	1.44647	up
AT1G62980.1	35	30	30	287	357	377	8.43239	6.73787	7.46528	76.3497	87.5553	97.1072	2.0864e-42	3.11438	up
AT1G62990.1	16	20	21	75	81	90	3.85481	4.49191	5.2257	19.952	19.8655	23.1821	5.22458e-07	1.79121	up
AT1G63000.1	136	147	141	423	453	392	32.7659	33.0156	35.0868	112.529	111.1	100.971	1.62181e-19	1.29991	up
AT1G63180.1	151	160	156	34	36	26	36.3798	35.9353	38.8195	9.04491	8.82911	6.69705	1.16762e-23	-2.52471	down
AT1G63220.1	171	136	159	630	695	670	41.1983	30.545	39.566	167.597	170.451	172.578	3.86877e-38	1.81169	up
AT1G63260.3	69	76	81	34	33	47	16.6239	17.0693	20.1563	9.04491	8.09335	12.1062	0.00018757	-1.23617	down
AT1G63450.1	1	0	1	14	15	16	0.240926	0	0.248843	3.72438	3.6788	4.12126	0.000810476	3.24361	up
AT1G63530.1	3	6	6	25	42	40	0.722777	1.34757	1.49306	6.65067	10.3006	10.3032	9.99134e-05	2.37372	up
AT1G63680.1	70	78	72	45	43	42	16.8648	17.5185	17.9167	11.9712	10.5459	10.8183	0.000911108	-1.01521	down
AT1G63840.1	82	124	119	387	433	458	19.7559	27.8499	29.6123	102.952	106.195	117.971	5.42888e-21	1.69188	up
AT1G63940.1	302	350	361	114	119	93	72.7595	78.6085	89.8322	30.3271	29.1851	23.9548	8.09025e-29	-1.89996	down
AT1G64060.1	27	45	30	109	126	128	6.50499	10.1068	7.46528	28.9969	30.9019	32.9701	2.28925e-07	1.53674	up
AT1G64150.1	31	29	38	16	8	18	7.46869	6.51327	9.45602	4.25643	1.96202	4.63642	0.00948465	-1.41902	down
AT1G64355.1	88	81	69	27	22	21	21.2014	18.1922	17.1701	7.18273	5.39557	5.40915	2.94422e-09	-1.99312	down
AT1G64360.1	4	4	7	37	48	37	0.963702	0.898383	1.7419	9.84299	11.7721	9.53042	7.05918e-06	2.56455	up
AT1G64370.1	603	679	661	288	356	352	145.278	152.5	164.485	76.6157	87.3101	90.6677	1.66211e-26	-1.23651	down
AT1G64390.1	27	30	32	101	135	88	6.50499	6.73787	7.96297	26.8687	33.1092	22.6669	1.26062e-06	1.55305	up
AT1G64400.1	49	53	45	136	177	154	11.8054	11.9036	11.1979	36.1797	43.4098	39.6671	1.79082e-08	1.3755	up
AT1G64405.1	16	23	15	134	174	165	3.85481	5.1657	3.73264	35.6476	42.674	42.5005	3.8478e-20	2.80301	up
AT1G64430.1	27	42	52	7	9	14	6.50499	9.43302	12.9398	1.86219	2.20728	3.6061	4.3388e-05	-2.16563	down
AT1G64500.1	73	63	58	19	16	20	17.5876	14.1495	14.4329	5.05451	3.92405	5.15158	4.47497e-08	-2.03595	down
AT1G64510.1	1050	1177	970	336	360	314	252.972	264.349	241.377	89.385	88.2911	80.8797	6.76012e-91	-1.93133	down
AT1G64590.1	7	5	4	51	61	65	1.68648	1.12298	0.995371	13.5674	14.9604	16.7426	2.48514e-09	3.02248	up
AT1G64660.1	85	99	100	36	31	30	20.4787	22.235	24.8843	9.57697	7.60284	7.72736	1.23634e-09	-1.79185	down
AT1G64680.1	318	393	295	63	64	53	76.6143	88.2661	73.4086	16.7597	15.6962	13.6517	2.50133e-48	-2.73235	down
AT1G64700.1	2	11	4	27	31	26	0.481851	2.47055	0.995371	7.18273	7.60284	6.69705	0.0071211	1.87373	up
AT1G64720.1	2632	3001	2501	577	514	486	634.116	674.012	622.356	153.497	126.06	125.183	4.45839e-204	-2.6328	down
AT1G64780.1	26	33	20	102	111	101	6.26406	7.41166	4.97685	27.1347	27.2231	26.0155	7.21504e-08	1.6884	up
AT1G64860.1	166	133	131	75	63	53	39.9936	29.8712	32.5984	19.952	15.4509	13.6517	3.91734e-08	-1.42797	down
AT1G64900.1	121	143	94	42	47	59	29.152	32.1172	23.3912	11.1731	11.5269	15.1971	6.5962e-08	-1.51908	down
AT1G64970.1	13	13	8	34	32	49	3.13203	2.91974	1.99074	9.04491	7.8481	12.6214	0.00884899	1.41762	up
AT1G65190.1	65	94	56	25	34	38	15.6602	21.112	13.9352	6.65067	8.3386	9.78799	0.0001395	-1.38156	down
AT1G65230.1	285	332	242	51	43	38	68.6638	74.5658	60.2199	13.5674	10.5459	9.78799	5.47408e-43	-2.94214	down
AT1G65250.1	2	6	5	23	24	19	0.481851	1.34757	1.24421	6.11862	5.88607	4.894	0.00892943	1.88449	up
AT1G65260.1	571	606	507	224	250	221	137.568	136.105	126.163	59.59	61.3133	56.9249	5.31737e-39	-1.54614	down
AT1G65270.3	38	35	43	90	96	106	9.15517	7.86085	10.7002	23.9424	23.5443	27.3034	0.000806867	1.03716	up
AT1G65310.1	133	116	248	654	696	579	32.0431	26.0531	61.713	173.982	170.696	149.138	2.31793e-10	1.64533	up
AT1G65390.1	29	50	42	17	22	16	6.98684	11.2298	10.4514	4.52246	5.39557	4.12126	0.0034162	-1.35783	down
AT1G65480.1	19	18	24	2	1	2	4.57759	4.04272	5.97222	0.532054	0.245253	0.515158	1.40406e-05	-3.36779	down
AT1G65481.1	7	12	7	83	70	75	1.68648	2.69515	1.7419	22.0802	17.1677	19.3184	1.81243e-10	2.75819	up
AT1G65484.1	9	9	8	39	50	41	2.16833	2.02136	1.99074	10.375	12.2627	10.5607	9.05544e-05	1.95012	up
AT1G65500.1	917	980	869	2138	2488	2673	220.929	220.104	216.244	568.765	610.189	688.508	6.04121e-37	1.12397	up
AT1G65610.1	17	4	14	79	95	110	4.09573	0.898383	3.4838	21.0161	23.299	28.3337	7.86022e-09	2.61811	up
AT1G65690.1	80	86	66	310	372	369	19.274	19.3152	16.4236	82.4683	91.2341	95.0466	4.65419e-26	1.8932	up
AT1G65730.1	7	13	6	83	106	105	1.68648	2.91974	1.49306	22.0802	25.9968	27.0458	3.46426e-14	3.11642	up
AT1G65790.1	3	4	6	27	34	36	0.722777	0.898383	1.49306	7.18273	8.3386	9.27284	0.000107788	2.42203	up
AT1G65800.1	27	38	32	75	82	87	6.50499	8.53463	7.96297	19.952	20.1107	22.4094	0.00190764	1.03954	up
AT1G65860.1	29	23	25	88	110	100	6.98684	5.1657	6.22107	23.4104	26.9778	25.7579	2.76555e-07	1.64049	up
AT1G65970.1	2198	2528	2787	245	210	211	529.554	567.778	693.525	65.1766	51.5031	54.3491	1.51569e-216	-3.75847	down
AT1G66130.1	48	36	54	10	11	12	11.5644	8.08544	13.4375	2.66027	2.69778	3.09095	1.41113e-06	-2.24858	down
AT1G66180.1	551	519	623	356	341	280	132.75	116.565	155.029	94.7056	83.6313	72.1221	1.95712e-12	-1.06703	down
AT1G66200.1	581	640	544	2337	2581	2568	139.978	143.741	135.37	621.705	632.998	661.462	1.95294e-138	1.80917	up
AT1G66230.1	49	45	34	16	21	16	11.8054	10.1068	8.46065	4.25643	5.15031	4.12126	0.000677153	-1.49538	down
AT1G66270.1	90	94	88	1093	1425	1036	21.6833	21.112	21.8982	290.767	349.486	266.852	5.74422e-117	3.41267	up
AT1G66280.1	105	97	124	399	479	429	25.2972	21.7858	30.8565	106.145	117.476	110.501	1.58719e-24	1.71314	up
AT1G66350.1	29	18	30	102	71	72	6.98684	4.04272	7.46528	27.1347	17.413	18.5457	0.000767338	1.35266	up
AT1G66390.1	0	0	0	35	46	49	0	0	0	9.31094	11.2816	12.6214	2.36159e-09	5.65441	up
AT1G66400.1	20	24	30	117	106	120	4.81851	5.3903	7.46528	31.1251	25.9968	30.9095	1.82694e-09	1.90116	up
AT1G66440.1	0	1	0	7	9	11	0	0.224596	0	1.86219	2.20728	2.83337	0.00930768	2.95141	up
AT1G66480.1	14	12	14	57	51	46	3.37296	2.69515	3.4838	15.1635	12.5079	11.8486	0.000310155	1.60956	up
AT1G66700.1	4	1	0	202	152	117	0.963702	0.224596	0	53.7374	37.2785	30.1367	1.22079e-21	5.72064	up
AT1G66760.2	183	215	201	6	4	3	44.0894	48.2881	50.0174	1.59616	0.981012	0.772736	4.92429e-41	-5.5702	down
AT1G66820.1	272	300	250	114	104	116	65.5317	67.3787	62.2107	30.3271	25.5063	29.8791	2.38658e-20	-1.56097	down
AT1G66890.1	127	160	110	38	52	50	30.5975	35.9353	27.3727	10.109	12.7532	12.8789	2.66564e-11	-1.75041	down
AT1G66920.2	57	58	58	131	147	146	13.7328	13.0265	14.4329	34.8495	36.0522	37.6065	3.14786e-05	1.00688	up
AT1G66980.1	90	76	85	46	57	46	21.6833	17.0693	21.1516	12.2372	13.9794	11.8486	0.000690802	-1.01715	down
AT1G67090.1	87967	93887	74616	16355	17594	16026	21193.5	21086.6	18567.6	4350.87	4314.98	4127.96	0	-2.62993	down
AT1G67140.2	0	0	0	28	26	32	0	0	0	7.44875	6.37658	8.24252	2.46048e-07	5.12127	up
AT1G67140.3	17	30	20	0	0	0	4.09573	6.73787	4.97685	0	0	0	1.56316e-07	-5.20642	down
AT1G67148.1	3	6	2	41	39	47	0.722777	1.34757	0.497685	10.9071	9.56487	12.1062	5.2243e-07	3.0213	up
AT1G67150.1	0	1	0	8	16	18	0	0.224596	0	2.12821	3.92405	4.63642	0.00076792	3.52605	up
AT1G67265.1	73	79	80	25	33	25	17.5876	17.7431	19.9074	6.65067	8.09335	6.43947	7.47084e-08	-1.7262	down
AT1G67330.1	52	47	50	260	290	269	12.5281	10.556	12.4421	69.167	71.1234	69.2887	5.06156e-27	2.16359	up
AT1G67360.1	1	3	2	20	27	20	0.240926	0.673787	0.497685	5.32054	6.62183	5.15158	0.000319216	2.80588	up
AT1G67360.2	26	25	33	512	635	625	6.26406	5.61489	8.21181	136.206	155.736	160.987	1.89156e-84	4.08212	up
AT1G67440.1	37	43	31	11	16	21	8.91424	9.65761	7.71412	2.9263	3.92405	5.40915	0.00344533	-1.42101	down
AT1G67560.1	56	57	56	153	166	151	13.4918	12.802	13.9352	40.7021	40.712	38.8944	2.5997e-07	1.18809	up
AT1G67600.1	32	43	44	19	22	22	7.70962	9.65761	10.9491	5.05451	5.39557	5.66673	0.0093992	-1.15353	down
AT1G67700.1	682	824	684	179	182	151	164.311	185.067	170.208	47.6188	44.636	38.8944	1.8389e-81	-2.36077	down
AT1G67700.2	98	42	54	0	11	12	23.6107	9.43302	13.4375	0	2.69778	3.09095	1.61273e-06	-3.09082	down
AT1G67740.1	2085	2241	1870	481	550	504	502.33	503.319	465.336	127.959	134.889	129.82	2.12154e-190	-2.28382	down
AT1G67750.1	35	30	45	110	138	135	8.43239	6.73787	11.1979	29.263	33.8449	34.7731	4.91931e-07	1.49248	up
AT1G67760.1	0	1	1	11	13	15	0	0.224596	0.248843	2.9263	3.18829	3.86368	0.0023826	3.04841	up
AT1G67800.2	5	9	8	45	44	48	1.20463	2.02136	1.99074	11.9712	10.7911	12.3638	1.00761e-05	2.25038	up
AT1G67810.1	6	5	6	78	68	74	1.44555	1.12298	1.49306	20.7501	16.6772	19.0608	4.2514e-12	3.26183	up
AT1G67820.1	2	3	0	32	26	39	0.481851	0.673787	0	8.51286	6.37658	10.0456	3.01847e-06	3.5098	up
AT1G67910.1	373	316	465	46	45	43	89.8652	70.9722	115.712	12.2372	11.0364	11.0759	5.20508e-48	-3.35109	down
AT1G67940.1	38	38	30	285	360	316	9.15517	8.53463	7.46528	75.8177	88.2911	81.3949	1.56111e-40	2.87591	up
AT1G68010.1	980	1123	852	102	93	101	236.107	252.221	212.014	27.1347	22.8085	26.0155	1.78799e-152	-3.57472	down
AT1G68110.1	46	40	56	15	20	11	11.0826	8.98383	13.9352	3.9904	4.90506	2.83337	4.17228e-05	-1.84034	down
AT1G68150.1	18	1	9	52	39	52	4.33666	0.224596	2.23958	13.8334	9.56487	13.3941	0.00700192	1.88218	up
AT1G68190.1	53	60	69	7	9	7	12.7691	13.4757	17.1701	1.86219	2.20728	1.80305	2.2843e-12	-3.12832	down
AT1G68238.1	658	614	573	58	46	40	158.529	137.902	142.587	15.4296	11.2816	10.3032	4.16381e-109	-3.92737	down
AT1G68240.2	11	8	6	0	1	0	2.65018	1.79677	1.49306	0	0.245253	0	0.00290705	-3.27511	down
AT1G68330.1	9	10	5	34	28	28	2.16833	2.24596	1.24421	9.04491	6.86708	7.21221	0.00999253	1.54201	up
AT1G68430.1	4	7	5	20	28	25	0.963702	1.57217	1.24421	5.32054	6.86708	6.43947	0.00784403	1.76926	up
AT1G68470.1	2	7	1	25	34	21	0.481851	1.57217	0.248843	6.65067	8.3386	5.40915	0.00106071	2.44479	up
AT1G68520.1	920	964	900	128	115	95	221.651	216.51	223.958	34.0514	28.2041	24.47	8.85414e-149	-3.30452	down
AT1G68560.1	959	1044	934	338	321	270	231.048	234.478	232.419	89.9171	78.7262	69.5463	1.04028e-72	-1.92896	down
AT1G68585.1	90	85	81	215	222	217	21.6833	19.0906	20.1563	57.1958	54.4462	55.8946	3.51011e-08	1.07057	up
AT1G68590.1	1528	1577	1390	525	553	515	368.134	354.187	345.891	139.664	135.625	132.653	6.44943e-113	-1.7683	down
AT1G68600.1	9	9	13	61	71	66	2.16833	2.02136	3.23496	16.2276	17.413	17.0002	6.31085e-08	2.31023	up
AT1G68660.1	353	412	369	204	241	233	85.0467	92.5334	91.823	54.2695	59.106	60.0159	3.46603e-14	-1.01252	down
AT1G68670.1	168	160	169	23	25	17	40.4755	35.9353	42.0544	6.11862	6.13133	4.37884	7.66448e-31	-3.16222	down
AT1G68725.1	4	3	4	30	22	21	0.963702	0.673787	0.995371	7.98081	5.39557	5.40915	0.00144393	2.2301	up
AT1G68730.1	11	13	10	32	42	60	2.65018	2.91974	2.48843	8.51286	10.3006	15.4547	0.00164347	1.62697	up
AT1G68760.1	59	63	66	165	167	180	14.2146	14.1495	16.4236	43.8944	40.9573	46.3642	2.8912e-07	1.15992	up
AT1G68765.1	17	27	22	154	172	188	4.09573	6.06408	5.47454	40.9681	42.1835	48.4248	1.78467e-20	2.64498	up
AT1G68850.1	1	0	2	17	22	26	0.240926	0	0.497685	4.52246	5.39557	6.69705	8.74546e-05	3.41229	up
AT1G68890.1	30	15	21	3	10	6	7.22777	3.36893	5.2257	0.798081	2.45253	1.54547	0.00632312	-1.91187	down
AT1G69200.1	82	69	65	40	40	31	19.7559	15.4971	16.1748	10.6411	9.81012	7.98494	0.000254698	-1.21331	down
AT1G69240.1	0	1	2	10	13	14	0	0.224596	0.497685	2.66027	3.18829	3.6061	0.00851195	2.62863	up
AT1G69260.1	42	44	35	3	6	5	10.1189	9.88221	8.70949	0.798081	1.47152	1.28789	5.75608e-09	-3.17747	down
AT1G69410.1	988	1093	976	2303	2648	2655	238.034	245.483	242.87	612.66	649.43	683.872	1.65141e-48	1.03973	up
AT1G69450.2	28	35	20	109	134	112	6.74592	7.86085	4.97685	28.9969	32.8639	28.8488	5.16101e-09	1.7917	up
AT1G69480.1	0	2	2	18	15	19	0	0.449191	0.497685	4.78848	3.6788	4.894	0.00132759	2.85349	up
AT1G69490.1	16	20	0	155	238	177	3.85481	4.49191	0	41.2342	58.3702	45.5914	0.00640738	2.85625	up
AT1G69740.1	540	507	460	274	300	287	130.1	113.87	114.468	72.8914	73.5759	73.9251	2.28829e-18	-1.07984	down
AT1G69830.1	257	312	268	134	147	152	61.9179	70.0738	66.6898	35.6476	36.0522	39.152	1.92918e-14	-1.21687	down
AT1G69880.1	21	30	17	238	313	267	5.05944	6.73787	4.23033	63.3144	76.7642	68.7735	1.31294e-36	3.26839	up
AT1G69890.1	103	139	104	43	63	51	24.8153	31.2188	25.8796	11.4392	15.4509	13.1365	2.32238e-07	-1.39356	down
AT1G69935.1	95	100	84	40	44	29	22.8879	22.4596	20.9028	10.6411	10.7911	7.46979	1.69366e-07	-1.55242	down
AT1G70000.1	13	5	12	63	58	63	3.13203	1.12298	2.98611	16.7597	14.2247	16.2275	2.17309e-06	2.23348	up
AT1G70000.2	15	20	11	75	86	80	3.61388	4.49191	2.73727	19.952	21.0918	20.6063	4.35274e-08	2.06096	up
AT1G70100.4	90	88	72	33	32	25	21.6833	19.7644	17.9167	8.77889	7.8481	6.43947	5.72095e-08	-1.71399	down
AT1G70140.1	18	33	20	58	79	76	4.33666	7.41166	4.97685	15.4296	19.375	19.576	0.00118489	1.28096	up
AT1G70170.1	3	4	9	34	47	54	0.722777	0.898383	2.23958	9.04491	11.5269	13.9093	8.14067e-06	2.60536	up
AT1G70260.1	0	0	0	96	75	94	0	0	0	25.5386	18.394	24.2124	9.00294e-14	6.57488	up
AT1G70270.1	1	1	1	15	17	11	0.240926	0.224596	0.248843	3.9904	4.1693	2.83337	0.00235696	2.86488	up
AT1G70290.1	198	228	231	48	47	52	47.7033	51.2078	57.4827	12.7693	11.5269	13.3941	3.62429e-30	-2.4114	down
AT1G70410.2	149	162	127	12	7	2	35.8979	36.3845	31.603	3.19232	1.71677	0.515158	7.16032e-30	-4.49303	down
AT1G70420.1	69	51	64	30	18	24	16.6239	11.4544	15.9259	7.98081	4.41455	6.18189	7.20827e-05	-1.58147	down
AT1G70460.1	6	4	1	34	43	50	1.44555	0.898383	0.248843	9.04491	10.5459	12.8789	1.45693e-06	2.9963	up
AT1G70580.1	76	85	64	49	51	32	18.3103	19.0906	15.9259	13.0353	12.5079	8.24252	0.00244555	-1.02215	down
AT1G70700.1	76	75	63	16	26	38	18.3103	16.8447	15.6771	4.25643	6.37658	9.78799	2.31852e-05	-1.64695	down
AT1G70760.1	441	433	374	26	41	29	106.248	97.2499	93.0672	6.9167	10.0554	7.46979	9.08523e-81	-3.94078	down
AT1G70780.1	1435	1725	1319	378	464	452	345.728	387.427	328.224	100.558	113.797	116.426	7.03352e-91	-2.05839	down
AT1G70820.1	285	329	257	26	31	29	68.6638	73.892	63.9526	6.9167	7.60284	7.46979	4.23503e-58	-3.57407	down
AT1G70990.1	25	19	25	117	157	133	6.02314	4.26732	6.22107	31.1251	38.5047	34.258	1.79355e-13	2.236	up
AT1G71015.1	7	5	6	61	54	48	1.68648	1.12298	1.49306	16.2276	13.2437	12.3638	4.84264e-08	2.754	up
AT1G71030.1	573	590	489	52	55	57	138.05	132.511	121.684	13.8334	13.4889	14.682	8.5408e-104	-3.58434	down
AT1G71400.1	18	17	14	63	58	66	4.33666	3.81813	3.4838	16.7597	14.2247	17.0002	5.72335e-05	1.61184	up
AT1G71500.1	832	869	742	149	217	190	200.45	195.174	184.641	39.638	53.2199	48.94	1.06346e-77	-2.40361	down
AT1G71695.1	1212	1119	1173	610	751	558	292.002	251.323	291.892	162.276	184.185	143.729	3.12716e-24	-1.14653	down
AT1G71697.1	124	108	110	337	343	364	29.8748	24.2563	27.3727	89.651	84.1218	93.7587	1.888e-15	1.32718	up
AT1G71710.2	18	15	30	3	1	3	4.33666	3.36893	7.46528	0.798081	0.245253	0.772736	8.20021e-05	-3.02256	down
AT1G71740.1	0	1	1	23	32	38	0	0.224596	0.248843	6.11862	7.8481	9.78799	5.5626e-07	4.25228	up
AT1G71970.1	142	160	159	57	65	48	34.2114	35.9353	39.566	15.1635	15.9414	12.3638	1.46187e-13	-1.69761	down
AT1G72125.1	1	1	1	12	16	11	0.240926	0.224596	0.248843	3.19232	3.92405	2.83337	0.00460801	2.73116	up
AT1G72150.1	1421	1466	1411	746	746	635	342.355	329.257	351.117	198.456	182.959	163.563	5.98621e-50	-1.28787	down
AT1G72180.1	176	172	177	91	91	81	42.4029	38.6305	44.0452	24.2084	22.318	20.8639	3.44563e-10	-1.26336	down
AT1G72200.1	16	17	29	58	75	58	3.85481	3.81813	7.21644	15.4296	18.394	14.9396	0.00250181	1.29653	up
AT1G72220.1	2	2	1	22	17	27	0.481851	0.449191	0.248843	5.85259	4.1693	6.95463	0.000220708	2.9779	up
AT1G72230.1	26	30	29	92	99	127	6.26406	6.73787	7.21644	24.4745	24.28	32.7125	5.76186e-07	1.5993	up
AT1G72410.1	86	94	77	42	62	49	20.7196	21.112	19.1609	11.1731	15.2057	12.6214	0.000657323	-1.00929	down
AT1G72610.1	6276	7291	5753	1114	1210	971	1512.05	1637.53	1431.59	296.354	296.756	250.109	1.0777e-286	-2.82007	down
AT1G72640.2	127	152	114	29	36	35	30.5975	34.1385	28.3681	7.71478	8.82911	9.01526	6.74575e-17	-2.21403	down
AT1G72645.1	333	405	310	81	74	69	80.2282	90.9612	77.1412	21.5482	18.1487	17.7729	5.08942e-45	-2.47917	down
AT1G72800.1	34	45	52	114	140	108	8.19147	10.1068	12.9398	30.3271	34.3354	27.8185	7.18641e-05	1.16955	up
AT1G72820.1	369	348	301	207	188	176	88.9015	78.1593	74.9017	55.0676	46.1076	45.3339	4.59877e-12	-1.10172	down
AT1G72990.1	0	0	0	33	25	46	0	0	0	8.77889	6.13133	11.8486	4.71867e-08	5.33483	up
AT1G72990.2	22	31	22	0	10	0	5.30036	6.96247	5.47454	0	2.45253	0	0.00371071	-2.66769	down
AT1G73010.1	4	4	4	29	31	30	0.963702	0.898383	0.995371	7.71478	7.60284	7.72736	0.000120699	2.42789	up
AT1G73040.1	0	0	2	11	25	26	0	0	0.497685	2.9263	6.13133	6.69705	0.000144633	3.59654	up
AT1G73060.1	262	279	226	149	152	134	63.1225	62.6622	56.2384	39.638	37.2785	34.5156	7.42542e-11	-1.08493	down
AT1G73120.1	589	634	569	61	65	47	141.905	142.394	141.591	16.2276	15.9414	12.1062	1.95475e-116	-3.62769	down
AT1G73330.1	1223	1387	1215	3109	3697	3341	294.652	311.514	302.344	827.077	906.7	860.571	6.7985e-72	1.13175	up
AT1G73390.1	32	41	40	17	17	15	7.70962	9.20842	9.95371	4.52246	4.1693	3.86368	0.00171661	-1.42577	down
AT1G73410.1	2	0	2	13	11	21	0.481851	0	0.497685	3.45835	2.69778	5.40915	0.00587436	2.60799	up
AT1G73470.3	64	64	60	13	19	27	15.4192	14.3741	14.9306	3.45835	4.65981	6.95463	1.42004e-06	-1.89054	down
AT1G73480.1	36	41	44	20	19	23	8.67332	9.20842	10.9491	5.32054	4.65981	5.92431	0.0060117	-1.19929	down
AT1G73600.2	42	49	27	461	534	577	10.1189	11.0052	6.71875	122.638	130.965	148.623	1.38664e-62	3.4338	up
AT1G73620.1	18	19	19	80	112	94	4.33666	4.26732	4.72801	21.2821	27.4683	24.2124	3.59705e-09	2.02576	up
AT1G73655.1	502	507	464	139	176	157	120.945	113.87	115.463	36.9777	43.1645	40.4399	8.65219e-47	-1.91123	down
AT1G73660.1	139	146	142	82	66	74	33.4886	32.791	35.3357	21.8142	16.1867	19.0608	1.51508e-07	-1.2035	down
AT1G73810.1	2	1	0	23	29	32	0.481851	0.224596	0	6.11862	7.11234	8.24252	3.82262e-06	3.79271	up
AT1G73870.1	19	21	35	11	6	4	4.57759	4.71651	8.70949	2.9263	1.47152	1.03032	0.00338822	-1.94637	down
AT1G74000.1	3	4	5	20	21	28	0.722777	0.898383	1.24421	5.32054	5.15031	7.21221	0.00372356	2.04564	up
AT1G74010.1	8	12	5	57	55	80	1.9274	2.69515	1.24421	15.1635	13.4889	20.6063	1.11584e-07	2.55484	up
AT1G74030.1	42	52	47	165	158	158	10.1189	11.679	11.6956	43.8944	38.75	40.6975	6.38655e-10	1.482	up
AT1G74070.1	74	86	72	17	12	21	17.8285	19.3152	17.9167	4.52246	2.94304	5.40915	3.08002e-11	-2.41614	down
AT1G74090.1	71	70	90	180	199	186	17.1057	15.7217	22.3958	47.8848	48.8053	47.9097	8.97827e-06	1.00206	up
AT1G74210.1	48	47	35	142	172	182	11.5644	10.556	8.70949	37.7758	42.1835	46.8793	1.70016e-10	1.63669	up
AT1G74370.1	110	139	108	41	48	37	26.5018	31.2188	26.875	10.9071	11.7721	9.53042	2.56268e-11	-1.75051	down
AT1G74410.1	43	48	54	140	143	130	10.3598	10.7806	13.4375	37.2438	35.0712	33.4852	1.99375e-06	1.21935	up
AT1G74458.1	78	84	124	52	50	46	18.7922	18.866	30.8565	13.8334	12.2627	11.8486	0.000213384	-1.20738	down
AT1G74460.1	5	8	7	131	130	175	1.20463	1.79677	1.7419	34.8495	31.8829	45.0763	5.90366e-23	4.02598	up
AT1G74470.1	2121	2349	2100	510	558	479	511.003	527.575	522.57	135.674	136.851	123.38	1.15535e-239	-2.35801	down
AT1G74500.1	3	4	8	56	54	51	0.722777	0.898383	1.99074	14.8975	13.2437	13.1365	3.18913e-08	2.96128	up
AT1G74530.3	27	46	28	11	16	12	6.50499	10.3314	6.9676	2.9263	3.92405	3.09095	0.00242666	-1.56481	down
AT1G74590.1	3	2	0	15	20	25	0.722777	0.449191	0	3.9904	4.90506	6.43947	0.000988708	2.80896	up
AT1G74670.1	527	528	575	311	292	230	126.968	118.587	143.085	82.7344	71.6139	59.2431	7.15612e-17	-1.23964	down
AT1G74730.1	761	778	628	251	313	280	183.344	174.735	156.273	66.7727	76.7642	72.1221	9.20467e-42	-1.63029	down
AT1G74850.1	60	64	46	31	25	28	14.4555	14.3741	11.4468	8.24683	6.13133	7.21221	0.000808844	-1.25391	down
AT1G74880.1	264	257	213	26	29	21	63.6043	57.7211	53.0035	6.9167	7.11234	5.40915	7.85076e-47	-3.50173	down
AT1G74910.1	276	348	289	152	183	158	66.4954	78.1593	71.9155	40.4361	44.8813	40.6975	9.90317e-14	-1.1565	down
AT1G74960.2	415	461	394	240	243	233	99.9841	103.539	98.044	63.8464	59.5965	60.0159	1.27538e-18	-1.09586	down
AT1G74970.1	1204	1348	1157	466	458	435	290.074	302.755	287.911	123.969	112.326	112.047	1.25719e-90	-1.71799	down
AT1G75180.1	41	41	19	15	8	14	9.87795	9.20842	4.72801	3.9904	1.96202	3.6061	0.00503846	-1.61083	down
AT1G75190.1	170	189	195	68	67	55	40.9573	42.4486	48.5243	18.0898	16.432	14.1668	3.74882e-17	-1.80239	down
AT1G75220.1	656	767	600	285	282	286	158.047	172.265	149.306	75.8177	69.1613	73.6675	1.19446e-39	-1.51193	down
AT1G75350.1	1033	1072	882	345	354	408	248.876	240.767	219.479	91.7793	86.8196	105.092	1.4138e-52	-1.69933	down
AT1G75380.2	700	835	698	1764	1937	1857	168.648	187.537	173.692	469.271	475.055	478.324	5.70544e-46	1.04186	up
AT1G75388.1	43	33	41	145	171	183	10.3598	7.41166	10.2026	38.5739	41.9383	47.1369	9.26216e-12	1.78861	up
AT1G75450.1	3	0	7	23	25	24	0.722777	0	1.7419	6.11862	6.13133	6.18189	0.00592846	2.23379	up
AT1G75460.1	305	391	272	23	30	31	73.4823	87.8169	67.6852	6.11862	7.35759	7.98494	2.31804e-58	-3.75173	down
AT1G75490.1	30	31	29	9	10	11	7.22777	6.96247	7.21644	2.39424	2.45253	2.83337	0.000661973	-1.76924	down
AT1G75690.1	877	943	820	117	124	103	211.292	211.794	204.051	31.1251	30.4114	26.5306	8.39503e-154	-3.20376	down
AT1G75750.1	4952	5239	4569	1366	1405	1427	1193.06	1176.66	1136.96	363.393	344.58	367.565	2.57456e-304	-2.08546	down
AT1G75780.1	38	34	55	172	172	158	9.15517	7.63625	13.6863	45.7566	42.1835	40.6975	8.58977e-10	1.67769	up
AT1G75820.1	117	145	120	58	74	56	28.1883	32.5664	29.8611	15.4296	18.1487	14.4244	1.18543e-07	-1.28265	down
AT1G75830.1	168	10	210	19	8	10	40.4755	2.24596	52.257	5.05451	1.96202	2.57579	0.00511663	-2.87001	down
AT1G75900.1	107	141	104	37	52	35	25.779	31.668	25.8796	9.84299	12.7532	9.01526	3.10674e-10	-1.7515	down
AT1G75960.1	99	94	82	6	5	10	23.8516	21.112	20.4051	1.59616	1.22627	2.57579	3.19432e-20	-3.83539	down
AT1G76010.1	195	198	228	77	123	131	46.9805	44.4699	56.7361	20.4841	30.1661	33.7428	8.75396e-07	-1.17645	down
AT1G76040.2	22	25	21	64	90	60	5.30036	5.61489	5.2257	17.0257	22.0728	15.4547	0.000400168	1.34082	up
AT1G76080.1	2595	2964	2240	582	691	596	625.202	665.702	557.408	154.828	169.47	153.517	4.44182e-150	-2.32933	down
AT1G76100.1	612	648	599	215	243	219	147.446	145.538	149.057	57.1958	59.5965	56.4098	3.59533e-55	-1.72799	down
AT1G76110.1	26	32	28	7	14	13	6.26406	7.18706	6.9676	1.86219	3.43354	3.34852	0.00501513	-1.53359	down
AT1G76350.1	4	2	10	47	71	57	0.963702	0.449191	2.48843	12.5033	17.413	14.682	1.30787e-07	2.95562	up
AT1G76410.1	215	226	224	37	51	34	51.799	50.7586	55.7408	9.84299	12.5079	8.75768	5.30279e-34	-2.69685	down
AT1G76450.1	410	463	364	126	144	152	98.7795	103.988	90.5787	33.5194	35.3164	39.152	2.32105e-34	-1.815	down
AT1G76590.1	71	60	51	21	16	17	17.1057	13.4757	12.691	5.58656	3.92405	4.37884	4.48591e-07	-1.96643	down
AT1G76680.2	0	0	0	65	24	63	0	0	0	17.2917	5.88607	16.2275	1.49542e-09	5.75056	up
AT1G76730.1	74	76	72	19	33	27	17.8285	17.0693	17.9167	5.05451	8.09335	6.95463	3.39268e-07	-1.73135	down
AT1G76760.1	24	27	15	53	67	58	5.78221	6.06408	3.73264	14.0994	16.432	14.9396	0.00659218	1.12671	up
AT1G76790.1	89	100	85	294	272	346	21.4424	22.4596	21.1516	78.2119	66.7088	89.1223	6.49777e-14	1.45416	up
AT1G76930.2	33	33	32	199	186	211	7.95054	7.41166	7.96297	52.9393	45.6171	54.3491	7.18585e-21	2.30317	up
AT1G76960.1	6	8	6	33	61	88	1.44555	1.79677	1.49306	8.77889	14.9604	22.6669	7.52508e-07	2.73407	up
AT1G76970.1	16	12	14	45	46	59	3.85481	2.69515	3.4838	11.9712	11.2816	15.1971	0.00104396	1.50261	up
AT1G76980.2	30	21	35	109	120	111	7.22777	4.71651	8.70949	28.9969	29.4304	28.5912	1.49868e-07	1.66795	up
AT1G76990.1	150	153	138	380	347	368	36.1388	34.3631	34.3403	101.09	85.1028	94.789	3.63904e-11	1.03516	up
AT1G76990.3	89	89	73	265	282	298	21.4424	19.989	18.1655	70.4971	69.1613	76.7585	1.62646e-15	1.4682	up
AT1G77060.1	152	176	168	50	50	55	36.6207	39.5288	41.8056	13.3013	12.2627	14.1668	4.06304e-18	-1.93157	down
AT1G77090.1	90	109	88	34	44	33	21.6833	24.4809	21.8982	9.04491	10.7911	8.5001	1.66332e-08	-1.6185	down
AT1G77120.1	13	8	12	290	496	729	3.13203	1.79677	2.98611	77.1478	121.645	187.775	2.81472e-42	5.07959	up
AT1G77210.2	57	69	42	23	21	14	13.7328	15.4971	10.4514	6.11862	5.15031	3.6061	2.42943e-05	-1.74461	down
AT1G77330.1	24	22	18	72	78	57	5.78221	4.9411	4.47917	19.1539	19.1297	14.682	0.000300167	1.38095	up
AT1G77420.1	54	58	50	144	146	147	13.01	13.0265	12.4421	38.3079	35.8069	37.8641	1.65102e-06	1.1466	up
AT1G77490.1	272	273	245	59	50	48	65.5317	61.3146	60.9665	15.6956	12.2627	12.3638	1.0947e-38	-2.58252	down
AT1G77520.1	9	3	4	38	52	70	2.16833	0.673787	0.995371	10.109	12.7532	18.0305	7.25179e-07	2.83751	up
AT1G77760.1	816	802	664	54	53	55	196.595	180.126	165.232	14.3655	12.9984	14.1668	1.14635e-138	-4.0663	down
AT1G77770.1	51	46	41	116	100	135	12.2872	10.3314	10.2026	30.8591	24.5253	34.7731	0.000391229	1.05903	up
AT1G77920.1	44	62	44	447	467	469	10.6007	13.9249	10.9491	118.914	114.533	120.804	1.46925e-58	2.91392	up
AT1G78020.1	67	66	78	327	351	336	16.142	14.8233	19.4097	86.9908	86.0838	86.5465	4.40304e-28	1.97474	up
AT1G78060.1	43	46	56	145	141	164	10.3598	10.3314	13.9352	38.5739	34.5807	42.2429	2.73716e-07	1.34147	up
AT1G78100.1	97	97	85	263	306	329	23.3698	21.7858	21.1516	69.9651	75.0474	84.7434	2.14946e-14	1.40248	up
AT1G78120.1	8	2	8	55	48	56	1.9274	0.449191	1.99074	14.6315	11.7721	14.4244	7.06578e-07	2.69082	up
AT1G78140.1	215	235	215	101	126	116	51.799	52.78	53.5012	26.8687	30.9019	29.8791	3.23394e-12	-1.22324	down
AT1G78170.1	164	173	179	98	105	77	39.5118	38.855	44.5428	26.0706	25.7516	19.8336	6.43138e-08	-1.14908	down
AT1G78180.1	76	80	54	27	38	30	18.3103	17.9677	13.4375	7.18273	9.31961	7.72736	6.46762e-05	-1.38746	down
AT1G78200.1	13	12	16	40	40	43	3.13203	2.69515	3.98148	10.6411	9.81012	11.0759	0.00999253	1.25671	up
AT1G78290.2	18	24	26	4	5	10	4.33666	5.3903	6.46991	1.06411	1.22627	2.57579	0.00296956	-1.9489	down
AT1G78370.1	155	143	154	534	563	546	37.3435	32.1172	38.3218	142.058	138.077	140.638	5.15301e-32	1.57974	up
AT1G78570.1	66	83	70	184	202	209	15.9011	18.6414	17.419	48.9489	49.5411	53.834	2.80994e-08	1.16013	up
AT1G78630.1	2265	2456	2097	765	816	703	545.696	551.607	521.823	203.511	200.126	181.078	3.49197e-146	-1.84928	down
AT1G78660.2	59	57	73	135	182	167	14.2146	12.802	18.1655	35.9136	44.636	43.0157	3.06697e-05	1.06249	up
AT1G78820.1	137	152	139	40	38	23	33.0068	34.1385	34.5891	10.6411	9.31961	5.92431	1.67359e-17	-2.32179	down
AT1G78830.1	759	853	638	259	274	226	182.862	191.58	158.762	68.901	67.1993	58.2128	7.47556e-48	-1.83303	down
AT1G78915.1	69	57	61	23	18	20	16.6239	12.802	15.1794	6.11862	4.41455	5.15158	7.6658e-07	-1.84157	down
AT1G78995.1	174	186	123	44	53	55	41.921	41.7748	30.6077	11.7052	12.9984	14.1668	3.58957e-14	-1.91389	down
AT1G79040.1	49225	53266	47549	11285	12778	10843	11859.6	11963.3	11832.2	3002.11	3133.84	2792.93	0	-2.37798	down
AT1G79180.1	5	5	3	71	79	83	1.20463	1.12298	0.746528	18.8879	19.375	21.379	9.38246e-14	3.68578	up
AT1G79320.1	1	1	1	137	159	168	0.240926	0.224596	0.248843	36.4457	38.9952	43.2732	7.42165e-22	6.19647	up
AT1G79510.1	63	87	66	47	37	37	15.1783	19.5398	16.4236	12.5033	9.07436	9.53042	0.00122237	-1.08108	down
AT1G79530.1	44	44	34	206	235	217	10.6007	9.88221	8.46065	54.8015	57.6345	55.8946	2.36619e-21	2.13459	up
AT1G79610.1	17	16	23	59	62	69	4.09573	3.59353	5.72338	15.6956	15.2057	17.7729	0.000341429	1.44163	up
AT1G79700.2	110	128	110	37	51	41	26.5018	28.7482	27.3727	9.84299	12.5079	10.5607	1.00126e-10	-1.68444	down
AT1G79790.1	259	325	281	62	63	48	62.3997	72.9936	69.9248	16.4937	15.4509	12.3638	3.61277e-40	-2.57368	down
AT1G79850.1	2990	3092	2685	1008	1127	1045	720.367	694.45	668.143	268.155	276.4	269.17	3.39677e-163	-1.73599	down
AT1G79860.1	0	0	0	10	12	11	0	0	0	2.66027	2.94304	2.83337	0.000693647	3.83894	up
AT1G80010.1	27	25	19	55	69	56	6.50499	5.61489	4.72801	14.6315	16.9225	14.4244	0.0092985	1.03823	up
AT1G80120.1	2	1	1	17	24	24	0.481851	0.224596	0.248843	4.52246	5.88607	6.18189	0.000126028	3.17343	up
AT1G80130.1	11	18	25	945	977	1023	2.65018	4.04272	6.22107	251.395	239.612	263.503	5.12559e-132	5.43615	up
AT1G80133.1	0	0	0	8	5	7	0	0	0	2.12821	1.22627	1.80305	0.00981357	3.15993	up
AT1G80180.1	1202	1419	1291	534	544	481	289.592	318.701	321.256	142.058	133.418	123.895	2.89923e-75	-1.59775	down
AT1G80210.1	15	16	7	52	50	63	3.61388	3.59353	1.7419	13.8334	12.2627	16.2275	0.00014482	1.77827	up
AT1G80240.1	17	16	21	51	70	61	4.09573	3.59353	5.2257	13.5674	17.1677	15.7123	0.000485798	1.42767	up
AT1G80300.1	70	61	64	188	248	232	16.8648	13.7003	15.9259	50.013	60.8227	59.7583	8.48867e-12	1.48309	up
AT1G80380.2	381	364	337	134	233	178	91.7926	81.7528	83.86	35.6476	57.144	45.849	3.25785e-11	-1.2627	down
AT1G80380.3	626	719	650	135	19	49	150.819	161.484	161.748	35.9136	4.65981	12.6214	1.84575e-05	-3.15186	down
AT1G80440.1	1332	1314	1385	106	101	65	320.913	295.119	344.647	28.1988	24.7706	16.7426	9.00018e-182	-4.14826	down
AT1G80480.1	260	272	201	138	149	136	62.6406	61.09	50.0174	36.7117	36.5427	35.0307	4.16215e-09	-1.0586	down
AT1G80650.1	85	100	96	50	44	41	20.4787	22.4596	23.8889	13.3013	10.7911	10.5607	3.28396e-06	-1.31034	down
AT1G80690.1	9	14	9	39	31	45	2.16833	3.14434	2.23958	10.375	7.60284	11.591	0.00472989	1.50576	up
AT1G80760.1	6	6	12	32	30	37	1.44555	1.34757	2.98611	8.51286	7.35759	9.53042	0.00514624	1.65797	up
AT1G80770.1	179	187	149	74	101	105	43.1257	41.9994	37.0776	19.686	24.7706	27.0458	2.43851e-07	-1.14303	down
AT1G80920.1	1046	1247	975	366	380	348	252.008	280.071	242.622	97.3658	93.1961	89.6374	6.29016e-77	-1.84571	down
AT2G01110.1	513	567	420	229	254	258	123.595	127.346	104.514	60.9201	62.2943	66.4553	5.75548e-21	-1.28367	down
AT2G01150.1	40	36	41	119	134	151	9.63702	8.08544	10.2026	31.6572	32.8639	38.8944	5.5276e-08	1.48928	up
AT2G01290.1	52	69	47	29	16	15	12.5281	15.4971	11.6956	7.71478	3.92405	3.86368	9.46412e-05	-1.68707	down
AT2G01320.1	53	50	31	17	29	10	12.7691	11.2298	7.71412	4.52246	7.11234	2.57579	0.00441639	-1.46989	down
AT2G01430.1	0	0	0	7	6	12	0	0	0	1.86219	1.47152	3.09095	0.00378812	3.43502	up
AT2G01450.1	52	40	43	111	125	137	12.5281	8.98383	10.7002	29.529	30.6566	35.2883	3.2934e-05	1.17127	up
AT2G01450.2	4	4	3	20	27	14	0.963702	0.898383	0.746528	5.32054	6.62183	3.6061	0.00900961	1.96871	up
AT2G01590.1	130	145	117	35	37	40	31.3203	32.5664	29.1146	9.31094	9.07436	10.3032	7.69203e-16	-2.05187	down
AT2G01620.1	109	108	91	43	60	60	26.2609	24.2563	22.6447	11.4392	14.7152	15.4547	1.91487e-05	-1.1776	down
AT2G01660.1	22	17	20	77	85	87	5.30036	3.81813	4.97685	20.4841	20.8465	22.4094	6.08245e-07	1.75694	up
AT2G01690.1	0	0	0	98	79	68	0	0	0	26.0706	19.375	17.5154	3.60272e-13	6.46675	up
AT2G01690.2	55	61	49	0	0	0	13.2509	13.7003	12.1933	0	0	0	6.00979e-13	-6.43286	down
AT2G01755.1	112	129	108	35	40	33	26.9837	28.9728	26.875	9.31094	9.81012	8.5001	2.02294e-13	-1.93829	down
AT2G01830.1	8	14	10	34	40	48	1.9274	3.14434	2.48843	9.04491	9.81012	12.3638	0.00211924	1.58507	up
AT2G01850.1	553	607	533	231	257	219	133.232	136.33	132.633	61.4522	63.03	56.4098	1.61046e-40	-1.52985	down
AT2G01860.1	94	104	91	36	45	39	22.647	23.3579	22.6447	9.57697	11.0364	10.0456	3.4857e-08	-1.5206	down
AT2G01870.1	145	130	128	32	34	30	34.9342	29.1974	31.8519	8.51286	8.3386	7.72736	1.37506e-18	-2.31356	down
AT2G01880.1	13	17	16	87	112	109	3.13203	3.81813	3.98148	23.1443	27.4683	28.0761	4.69924e-12	2.40756	up
AT2G01918.1	41	44	32	3	2	2	9.87795	9.88221	7.96297	0.798081	0.490506	0.515158	4.18843e-10	-3.94455	down
AT2G01930.2	26	32	45	15	9	16	6.26406	7.18706	11.1979	3.9904	2.20728	4.12126	0.00391002	-1.55521	down
AT2G02070.1	108	100	76	46	56	50	26.02	22.4596	18.912	12.2372	13.7342	12.8789	6.49946e-05	-1.15898	down
AT2G02500.1	112	103	74	44	59	48	26.9837	23.1334	18.4144	11.7052	14.4699	12.3638	7.57184e-05	-1.19263	down
AT2G02580.1	1	1	0	47	46	52	0.240926	0.224596	0	12.5033	11.2816	13.3941	4.77015e-10	4.89545	up
AT2G02710.2	249	318	243	55	60	54	59.9905	71.4214	60.4688	14.6315	14.7152	13.9093	1.66671e-37	-2.51087	down
AT2G02850.1	12	5	5	35	47	41	2.89111	1.12298	1.24421	9.31094	11.5269	10.5607	0.000247621	2.06859	up
AT2G02950.1	129	165	169	60	72	69	31.0794	37.0583	42.0544	15.9616	17.6582	17.7729	2.72945e-10	-1.46363	down
AT2G02990.1	20	10	13	62	90	119	4.81851	2.24596	3.23496	16.4937	22.0728	30.6519	1.64252e-07	2.28463	up
AT2G03090.1	12	6	13	64	59	82	2.89111	1.34757	3.23496	17.0257	14.4699	21.1215	3.23434e-07	2.34438	up
AT2G03200.1	1	4	5	29	37	28	0.240926	0.898383	1.24421	7.71478	9.07436	7.21221	6.46408e-05	2.68791	up
AT2G03310.1	139	152	138	57	69	64	33.4886	34.1385	34.3403	15.1635	16.9225	16.485	9.87442e-11	-1.4361	down
AT2G03370.1	0	0	0	8	11	14	0	0	0	2.12821	2.69778	3.6061	0.000767338	3.81922	up
AT2G03420.1	98	112	68	18	19	14	23.6107	25.1547	16.9213	4.78848	4.65981	3.6061	1.10213e-13	-2.64536	down
AT2G03440.1	765	847	712	348	474	388	184.308	190.233	177.176	92.5773	116.25	99.9406	3.27433e-26	-1.21447	down
AT2G03530.1	12	20	20	40	58	53	2.89111	4.49191	4.97685	10.6411	14.2247	13.6517	0.00826307	1.21764	up
AT2G03550.1	31	34	31	12	15	15	7.46869	7.63625	7.71412	3.19232	3.6788	3.86368	0.00403804	-1.40785	down
AT2G03590.1	1	0	0	15	15	17	0.240926	0	0	3.9904	3.6788	4.37884	0.000228484	3.72183	up
AT2G03720.1	7	2	3	51	76	81	1.68648	0.449191	0.746528	13.5674	18.6392	20.8639	6.79367e-11	3.58373	up
AT2G03750.1	91	112	83	23	25	24	21.9242	25.1547	20.6539	6.11862	6.13133	6.18189	6.04738e-13	-2.21717	down
AT2G04030.1	335	395	269	193	182	193	80.7101	88.7153	66.9387	51.3432	44.636	49.7127	2.35176e-10	-1.07593	down
AT2G04040.1	93	98	78	59	43	51	22.4061	22.0104	19.4097	15.6956	10.5459	13.1365	0.000383269	-1.06511	down
AT2G04100.1	18	17	10	48	62	59	4.33666	3.81813	2.48843	12.7693	15.2057	15.1971	0.000311464	1.57895	up
AT2G04160.1	24	21	25	96	137	87	5.78221	4.71651	6.22107	25.5386	33.5997	22.4094	4.18293e-08	1.86605	up
AT2G04270.1	22	27	17	5	11	2	5.30036	6.06408	4.23033	1.33013	2.69778	0.515158	0.00580452	-1.96136	down
AT2G04350.1	60	62	52	150	176	145	14.4555	13.9249	12.9398	39.904	43.1645	37.3489	1.04872e-06	1.14918	up
AT2G04360.1	151	140	130	82	87	83	36.3798	31.4434	32.3496	21.8142	21.337	21.379	4.95698e-06	-1.0069	down
AT2G04495.1	7	16	9	63	106	98	1.68648	3.59353	2.23958	16.7597	25.9968	25.2427	5.47405e-10	2.68412	up
AT2G04515.1	21	24	20	94	102	107	5.05944	5.3903	4.97685	25.0065	25.0158	27.5609	2.23359e-09	1.90929	up
AT2G04700.1	1733	1921	1548	626	665	680	417.524	431.448	385.208	166.533	163.093	175.154	2.20203e-92	-1.66942	down
AT2G04780.1	132	119	137	398	488	439	31.8022	26.7269	34.0914	105.879	119.683	113.077	2.20343e-21	1.48486	up
AT2G04790.2	54	36	32	6	5	9	13.01	8.08544	7.96297	1.59616	1.22627	2.31821	5.46184e-07	-2.71476	down
AT2G05070.1	1503	1613	1411	291	300	252	362.111	362.273	351.117	77.4138	73.5759	64.9099	1.0639e-191	-2.69386	down
AT2G05100.1	1955	2104	1847	426	466	412	471.009	472.549	459.612	113.327	114.288	106.122	6.65568e-236	-2.45037	down
AT2G05260.1	29	46	30	68	108	98	6.98684	10.3314	7.46528	18.0898	26.4873	25.2427	0.00231681	1.08781	up
AT2G05310.1	467	504	490	101	101	61	112.512	113.196	121.933	26.8687	24.7706	15.7123	5.02538e-52	-2.73103	down
AT2G05380.1	28911	32354	28571	3008	2945	2376	6965.4	7266.57	7109.68	800.209	722.27	612.007	0	-3.6994	down
AT2G05540.1	1200	1326	1112	60	64	43	289.111	297.814	276.713	15.9616	15.6962	11.0759	2.06575e-231	-4.69715	down
AT2G05620.1	311	349	300	127	132	139	74.9278	78.3839	74.6528	33.7854	32.3734	35.8035	2.73438e-24	-1.53544	down
AT2G05940.1	30	43	48	119	92	130	7.22777	9.65761	11.9444	31.6572	22.5633	33.4852	0.000285394	1.20222	up
AT2G05990.2	397	527	502	292	249	275	95.6474	118.362	124.919	77.6798	61.068	70.8342	3.23394e-12	-1.06986	down
AT2G06050.1	75	79	80	247	249	255	18.0694	17.7431	19.9074	65.7086	61.068	65.6826	9.58465e-14	1.39833	up
AT2G06520.1	19964	20847	17786	4023	4424	3978	4809.84	4682.15	4425.92	1070.23	1085	1024.65	0	-2.51034	down
AT2G07671.1	67	50	60	160	156	154	16.142	11.2298	14.9306	42.5643	38.2595	39.6671	7.81239e-06	1.11797	up
AT2G10940.1	1725	1619	1656	742	694	583	415.597	363.62	412.084	197.392	170.206	150.168	2.5759e-50	-1.58072	down
AT2G11810.1	1	2	1	11	27	9	0.240926	0.449191	0.248843	2.9263	6.62183	2.31821	0.00501765	2.65566	up
AT2G12462.1	6	10	11	44	45	28	1.44555	2.24596	2.73727	11.7052	11.0364	7.21221	0.00159808	1.74085	up
AT2G13360.1	913	1204	582	67	74	57	219.965	270.413	144.826	17.8238	18.1487	14.682	1.41591e-71	-3.98922	down
AT2G13360.2	198	162	359	0	0	0	47.7033	36.3845	89.3345	0	0	0	2.76554e-24	-8.22161	down
AT2G13790.1	62	65	60	187	201	185	14.9374	14.5987	14.9306	49.747	49.2959	47.6521	2.67039e-10	1.32936	up
AT2G13800.1	12	10	15	53	51	51	2.89111	2.24596	3.73264	14.0994	12.5079	13.1365	0.000137583	1.72193	up
AT2G13820.1	24	29	36	117	114	91	5.78221	6.51327	8.95834	31.1251	27.9588	23.4397	1.45147e-06	1.54825	up
AT2G14170.3	410	480	428	118	196	170	98.7795	107.806	106.505	31.3912	48.0696	43.7884	1.1601e-23	-1.71285	down
AT2G14247.1	0	3	1	21	62	83	0	0.673787	0.248843	5.58656	15.2057	21.379	1.98555e-08	4.35544	up
AT2G14560.1	26	44	51	275	390	344	6.26406	9.88221	12.691	73.1574	95.6487	88.6071	1.23721e-28	2.74602	up
AT2G14560.2	10	10	18	109	129	126	2.40926	2.24596	4.47917	28.9969	31.6376	32.4549	7.15045e-16	2.90027	up
AT2G14610.1	0	0	1	123	42	48	0	0	0.248843	32.7213	10.3006	12.3638	4.23229e-11	5.64684	up
AT2G14880.1	165	187	157	82	72	83	39.7527	41.9994	39.0683	21.8142	17.6582	21.379	7.96781e-11	-1.36117	down
AT2G14910.1	618	651	568	332	334	329	148.892	146.212	141.343	88.3209	81.9145	84.7434	1.29208e-27	-1.15496	down
AT2G15080.2	29	37	23	7	6	6	6.98684	8.31004	5.72338	1.86219	1.47152	1.54547	4.06967e-05	-2.33789	down
AT2G15090.1	1013	1064	1028	426	463	397	244.058	238.97	255.81	113.327	113.552	102.259	9.99664e-67	-1.54481	down
AT2G15220.1	15	22	15	61	68	78	3.61388	4.9411	3.73264	16.2276	16.6772	20.0911	1.84352e-05	1.67517	up
AT2G15320.1	35	35	30	88	95	97	8.43239	7.86085	7.46528	23.4104	23.299	24.9851	0.000102098	1.19126	up
AT2G15390.2	22	32	25	93	140	130	5.30036	7.18706	6.22107	24.7405	34.3354	33.4852	2.84511e-09	1.88726	up
AT2G15620.1	141	168	124	38	47	42	33.9705	37.7321	30.8565	10.109	11.5269	10.8183	3.42088e-16	-2.01612	down
AT2G15830.1	80	99	76	291	356	331	19.274	22.235	18.912	77.4138	87.3101	85.2586	9.83954e-21	1.65538	up
AT2G15890.1	3407	3851	3117	659	735	733	820.833	864.918	775.643	175.312	180.261	188.805	5.7776e-276	-2.55538	down
AT2G15890.2	19	26	14	4	2	2	4.57759	5.83949	3.4838	1.06411	0.490506	0.515158	0.000192132	-2.78591	down
AT2G15960.1	2904	3073	3025	838	888	799	699.648	690.182	752.749	222.931	217.785	205.805	4.77763e-234	-2.10764	down
AT2G15970.1	1185	1350	1085	509	556	599	285.497	303.204	269.994	135.408	136.361	154.29	1.05508e-47	-1.38999	down
AT2G16005.1	29	10	23	4	5	6	6.98684	2.24596	5.72338	1.06411	1.22627	1.54547	0.00400401	-2.11041	down
AT2G16060.1	33	28	29	182	237	250	7.95054	6.28868	7.21644	48.4169	58.125	64.3947	1.34261e-23	2.58009	up
AT2G16365.2	86	144	87	48	68	66	20.7196	32.3418	21.6493	12.7693	16.6772	17.0002	0.000860918	-1.04877	down
AT2G16385.1	3	3	3	45	55	62	0.722777	0.673787	0.746528	11.9712	13.4889	15.9699	6.82997e-10	3.6057	up
AT2G16595.1	21	27	21	51	70	62	5.05944	6.06408	5.2257	13.5674	17.1677	15.9699	0.00514343	1.10345	up
AT2G16660.1	126	163	98	429	530	566	30.3566	36.6091	24.3866	114.126	129.984	145.79	3.94613e-20	1.69783	up
AT2G16740.1	39	72	46	153	194	191	9.3961	16.1709	11.4468	40.7021	47.5791	49.1976	2.81893e-08	1.4884	up
AT2G16760.1	1	1	2	16	16	25	0.240926	0.224596	0.497685	4.25643	3.92405	6.43947	0.000544378	2.9823	up
AT2G16890.2	4	1	10	27	37	35	0.963702	0.224596	2.48843	7.18273	9.07436	9.01526	0.00176564	2.20021	up
AT2G16980.2	6	7	0	35	36	36	1.44555	1.57217	0	9.31094	8.82911	9.27284	0.00018516	2.53156	up
AT2G17040.1	5	19	10	34	43	59	1.20463	4.26732	2.48843	9.04491	10.5459	15.1971	0.00439299	1.64193	up
AT2G17070.1	3	2	3	34	32	18	0.722777	0.449191	0.746528	9.04491	7.8481	4.63642	0.000111399	2.78369	up
AT2G17080.1	11	7	7	51	70	54	2.65018	1.57217	1.7419	13.5674	17.1677	13.9093	2.96181e-07	2.41521	up
AT2G17220.1	54	69	68	166	165	188	13.01	15.4971	16.9213	44.1605	40.4667	48.4248	7.20615e-07	1.15822	up
AT2G17240.1	565	586	506	255	272	250	136.123	131.613	125.914	67.8368	66.7088	64.3947	1.38853e-32	-1.36278	down
AT2G17280.1	35	24	31	108	122	129	8.43239	5.3903	7.71412	28.7309	29.9209	33.2277	2.75564e-08	1.68578	up
AT2G17450.1	245	257	234	124	98	98	59.0268	57.7211	58.2292	32.9873	24.0348	25.2427	5.42515e-15	-1.46254	down
AT2G17500.2	25	21	20	121	149	118	6.02314	4.71651	4.97685	32.1892	36.5427	30.3943	1.62319e-13	2.23491	up
AT2G17550.1	28	31	30	13	3	10	6.74592	6.96247	7.46528	3.45835	0.735759	2.57579	0.00197349	-1.89839	down
AT2G17695.1	119	104	103	50	54	71	28.6701	23.3579	25.6308	13.3013	13.2437	18.2881	3.34688e-05	-1.15665	down
AT2G17710.1	109	101	118	1630	1770	1617	26.2609	22.6842	29.3634	433.624	434.098	416.505	1.18973e-228	3.64865	up
AT2G17720.1	241	256	206	531	613	612	58.0631	57.4965	51.2616	141.26	150.34	157.638	2.66821e-16	1.04378	up
AT2G17850.1	0	0	0	39	67	111	0	0	0	10.375	16.432	28.5912	1.33308e-11	6.20614	up
AT2G17880.1	370	364	374	40	57	54	89.1424	81.7528	93.0672	10.6411	13.9794	13.9093	6.98713e-63	-3.13024	down
AT2G17972.1	172	189	135	63	63	69	41.4392	42.4486	33.5938	16.7597	15.4509	17.7729	2.04319e-12	-1.59999	down
AT2G18050.1	119	74	66	10	9	0	28.6701	16.6201	16.4236	2.66027	2.20728	0	3.17515e-12	-3.79501	down
AT2G18150.1	0	0	0	11	13	12	0	0	0	2.9263	3.18829	3.09095	0.000396764	3.95696	up
AT2G18230.1	26	15	13	88	90	92	6.26406	3.36893	3.23496	23.4104	22.0728	23.6973	1.32936e-07	1.98869	up
AT2G18280.2	582	703	647	381	393	391	140.219	157.891	161.001	101.356	96.3844	100.713	6.72167e-21	-1.0001	down
AT2G18328.1	20	26	21	120	132	113	4.81851	5.83949	5.2257	31.9232	32.3734	29.1064	1.31355e-12	2.13328	up
AT2G18360.1	6	9	9	55	61	68	1.44555	2.02136	2.23958	14.6315	14.9604	17.5154	2.76157e-08	2.5533	up
AT2G18370.1	6	11	6	214	248	271	1.44555	2.47055	1.49306	56.9297	60.8227	69.8039	1.19753e-38	4.59366	up
AT2G18560.1	30	23	27	11	8	13	7.22777	5.1657	6.71875	2.9263	1.96202	3.34852	0.00774826	-1.51031	down
AT2G18660.1	1	3	4	91	119	165	0.240926	0.673787	0.995371	24.2084	29.1851	42.5005	4.53917e-19	4.90609	up
AT2G18710.1	419	446	401	138	152	150	100.948	100.17	99.7859	36.7117	37.2785	38.6368	1.43806e-40	-1.79209	down
AT2G18730.1	83	95	82	197	223	250	19.9968	21.3366	20.4051	52.4073	54.6914	64.3947	1.09856e-07	1.08425	up
AT2G18800.1	0	0	1	9	17	14	0	0	0.248843	2.39424	4.1693	3.6061	0.000972035	3.46393	up
AT2G18950.1	83	104	76	198	247	220	19.9968	23.3579	18.912	52.6733	60.5775	56.6673	2.03124e-07	1.05716	up
AT2G19130.1	11	16	20	50	78	67	2.65018	3.59353	4.97685	13.3013	19.1297	17.2578	6.77824e-05	1.71175	up
AT2G19150.1	1	1	0	17	15	16	0.240926	0.224596	0	4.52246	3.6788	4.12126	0.000462633	3.34619	up
AT2G19590.1	16	5	17	219	246	241	3.85481	1.12298	4.23033	58.2599	60.3322	62.0765	1.499e-32	3.84408	up
AT2G19800.1	929	1076	925	149	138	156	223.82	241.665	230.179	39.638	33.8449	40.1823	2.13273e-149	-2.98823	down
AT2G20020.1	46	58	53	29	27	24	11.0826	13.0265	13.1887	7.71478	6.62183	6.18189	0.00131286	-1.2139	down
AT2G20110.2	0	0	0	10	7	12	0	0	0	2.66027	1.71677	3.09095	0.0016028	3.65019	up
AT2G20260.1	4460	4582	4406	1086	1254	1081	1074.53	1029.1	1096.4	288.905	307.547	278.443	0	-2.24987	down
AT2G20515.1	13	16	11	85	107	68	3.13203	3.59353	2.73727	22.6123	26.2421	17.5154	1.95285e-09	2.35099	up
AT2G20520.1	8	9	3	101	113	122	1.9274	2.02136	0.746528	26.8687	27.7136	31.4246	5.21058e-18	3.65565	up
AT2G20560.1	31	23	21	74	67	67	7.46869	5.1657	5.2257	19.686	16.432	17.2578	0.00207043	1.16773	up
AT2G20630.1	213	237	241	519	587	642	51.3171	53.2292	59.9711	138.068	143.964	165.366	1.18102e-14	1.05999	up
AT2G20670.1	1780	1955	1863	15	6	10	428.847	439.084	463.594	3.9904	1.47152	2.57579	4.6492e-193	-7.65388	down
AT2G20690.1	179	188	203	112	108	91	43.1257	42.224	50.5151	29.795	26.4873	23.4397	1.44275e-08	-1.14115	down
AT2G20890.1	1510	1600	1354	583	639	545	363.798	359.353	336.933	155.094	156.717	140.38	1.34163e-83	-1.60869	down
AT2G20900.2	13	26	26	63	87	92	3.13203	5.83949	6.46991	16.7597	21.337	23.6973	7.59799e-05	1.57582	up
AT2G21045.1	48	64	37	163	189	177	11.5644	14.3741	9.20718	43.3624	46.3528	45.5914	6.26082e-10	1.53993	up
AT2G21170.1	1801	1946	1657	1028	1028	1033	433.907	437.063	412.332	273.476	252.12	266.079	6.41524e-53	-1.07792	down
AT2G21210.1	296	290	223	10	10	13	71.314	65.1327	55.4919	2.66027	2.45253	3.34852	6.43796e-55	-4.78745	down
AT2G21240.2	20	9	19	6	1	1	4.81851	2.02136	4.72801	1.59616	0.245253	0.257579	0.00599223	-2.42666	down
AT2G21280.1	113	113	89	50	66	50	27.2246	25.3793	22.147	13.3013	16.1867	12.8789	1.31298e-05	-1.18407	down
AT2G21330.1	1029	1069	716	204	169	169	247.912	240.093	178.171	54.2695	41.4478	43.5308	2.00786e-59	-2.62869	down
AT2G21340.1	39	45	68	120	185	148	9.3961	10.1068	16.9213	31.9232	45.3718	38.1217	5.25512e-05	1.26667	up
AT2G21530.1	323	347	288	67	49	48	77.8189	77.9347	71.6667	17.8238	12.0174	12.3638	6.32171e-45	-2.79286	down
AT2G21540.2	69	76	73	41	42	44	16.6239	17.0693	18.1655	10.9071	10.3006	11.3335	0.000764234	-1.03607	down
AT2G21620.2	287	276	230	556	720	753	69.1456	61.9884	57.2338	147.911	176.582	193.957	8.22697e-13	1.07476	up
AT2G21650.1	0	0	0	8	17	10	0	0	0	2.12821	4.1693	2.57579	0.000611609	3.87217	up
AT2G21820.1	79	31	80	17	12	23	19.0331	6.96247	19.9074	4.52246	2.94304	5.92431	6.90264e-05	-2.05056	down
AT2G21840.1	6	10	5	34	42	38	1.44555	2.24596	1.24421	9.04491	10.3006	9.78799	0.000194723	2.04923	up
AT2G21850.1	3	6	9	46	53	58	0.722777	1.34757	2.23958	12.2372	12.9984	14.9396	3.30965e-07	2.68991	up
AT2G21860.1	58	71	40	22	21	31	13.9737	15.9463	9.95371	5.85259	5.15031	7.98494	0.000644409	-1.41141	down
AT2G21960.1	271	308	217	47	56	42	65.2908	69.1755	53.9989	12.5033	13.7342	10.8183	3.17244e-36	-2.70201	down
AT2G22000.1	15	24	17	54	68	58	3.61388	5.3903	4.23033	14.3655	16.6772	14.9396	0.000745651	1.37197	up
AT2G22080.1	413	440	413	176	241	191	99.5022	98.8221	102.772	46.8207	59.106	49.1976	3.65496e-21	-1.33068	down
AT2G22240.2	20	25	18	120	58	92	4.81851	5.61489	4.47917	31.9232	14.2247	23.6973	2.14191e-05	1.78113	up
AT2G22250.2	20	22	26	53	77	96	4.81851	4.9411	6.46991	14.0994	18.8845	24.7276	0.000488874	1.41226	up
AT2G22250.3	5	14	9	32	40	35	1.20463	3.14434	2.23958	8.51286	9.81012	9.01526	0.00550999	1.5752	up
AT2G22450.1	199	204	231	127	115	119	47.9442	45.8175	57.4827	33.7854	28.2041	30.6519	2.10638e-08	-1.08018	down
AT2G22470.1	110	133	123	804	890	1001	26.5018	29.8712	30.6077	213.886	218.275	257.836	4.28091e-77	2.59667	up
AT2G22510.1	18	15	17	221	231	256	4.33666	3.36893	4.23033	58.7919	56.6534	65.9402	6.5388e-36	3.49026	up
AT2G22920.1	0	0	0	18	19	23	0	0	0	4.78848	4.65981	5.92431	8.04188e-06	4.64094	up
AT2G22930.1	2	2	0	49	59	43	0.481851	0.449191	0	13.0353	14.4699	11.0759	5.26325e-10	4.36886	up
AT2G22980.2	39	56	30	3	4	6	9.3961	12.5774	7.46528	0.798081	0.981012	1.54547	9.37081e-09	-3.28619	down
AT2G22990.1	1667	1040	672	0	0	0	401.623	233.579	167.222	0	0	0	1.56677e-35	-9.78842	down
AT2G23030.1	120	107	114	42	40	31	28.9111	24.0317	28.3681	11.1731	9.81012	7.98494	2.99655e-11	-1.84257	down
AT2G23050.1	1	2	2	23	18	13	0.240926	0.449191	0.497685	6.11862	4.41455	3.34852	0.00160762	2.68948	up
AT2G23130.1	342	332	311	158	163	125	82.3965	74.5658	77.3901	42.0322	39.9762	32.1974	2.54242e-18	-1.41158	down
AT2G23150.1	75	74	58	35	42	37	18.0694	16.6201	14.4329	9.31094	10.3006	9.53042	0.000669481	-1.11404	down
AT2G23300.1	0	1	2	28	27	33	0	0.224596	0.497685	7.44875	6.62183	8.5001	1.90193e-06	3.86359	up
AT2G23390.1	59	73	52	35	39	33	14.2146	16.3955	12.9398	9.31094	9.56487	8.5001	0.00304613	-1.03142	down
AT2G23440.1	0	0	0	14	16	25	0	0	0	3.72438	3.92405	6.43947	2.09701e-05	4.49633	up
AT2G23540.1	3	10	8	97	105	105	0.722777	2.24596	1.99074	25.8046	25.7516	27.0458	3.89934e-16	3.4623	up
AT2G23620.1	60	43	37	224	272	298	14.4555	9.65761	9.20718	59.59	66.7088	76.7585	2.31828e-19	2.19931	up
AT2G23630.1	0	1	1	10	18	16	0	0.224596	0.248843	2.66027	4.41455	4.12126	0.00115674	3.19719	up
AT2G23670.1	609	696	536	245	276	263	146.724	156.319	133.38	65.1766	67.6898	67.7432	6.60745e-36	-1.49885	down
AT2G23680.2	72	64	49	189	185	129	17.3466	14.3741	12.1933	50.2791	45.3718	33.2277	3.10419e-05	1.1525	up
AT2G23840.1	141	158	121	56	58	77	33.9705	35.4861	30.11	14.8975	14.2247	19.8336	2.34587e-08	-1.38984	down
AT2G23960.1	0	0	0	13	12	14	0	0	0	3.45835	2.94304	3.6061	0.000229712	4.06628	up
AT2G24020.2	805	900	786	318	326	331	193.945	202.136	195.59	84.5965	79.9525	85.2586	1.96154e-63	-1.62266	down
AT2G24040.1	86	105	106	228	247	283	20.7196	23.5825	26.3773	60.6541	60.5775	72.8948	8.31826e-08	1.07016	up
AT2G24060.1	429	459	365	164	160	157	103.357	103.089	90.8276	43.6284	39.2405	40.4399	8.27851e-31	-1.64579	down
AT2G24090.1	895	1003	890	285	328	287	215.628	225.269	221.47	75.8177	80.443	73.9251	7.38609e-89	-1.90191	down
AT2G24170.1	27	22	25	75	87	95	6.50499	4.9411	6.22107	19.952	21.337	24.47	1.3884e-05	1.48557	up
AT2G24240.1	61	76	75	37	43	41	14.6965	17.0693	18.6632	9.84299	10.5459	10.5607	0.000878026	-1.06462	down
AT2G24270.1	469	532	483	138	171	154	112.994	119.485	120.191	36.7117	41.9383	39.6671	2.17651e-50	-1.9484	down
AT2G24280.1	140	137	133	57	97	71	33.7296	30.7696	33.0961	15.1635	23.7895	18.2881	8.65643e-06	-1.13392	down
AT2G24300.1	7	5	12	45	50	34	1.68648	1.12298	2.98611	11.9712	12.2627	8.75768	0.00023297	2.02022	up
AT2G24390.3	28	38	23	116	131	102	6.74592	8.53463	5.72338	30.8591	32.1281	26.273	4.67296e-08	1.67027	up
AT2G24395.1	122	141	148	20	44	26	29.3929	31.668	36.8287	5.32054	10.7911	6.69705	2.03688e-15	-2.42795	down
AT2G24400.1	1	0	1	21	21	10	0.240926	0	0.248843	5.58656	5.15031	2.57579	0.000393928	3.40137	up
AT2G24610.1	3	4	1	23	23	20	0.722777	0.898383	0.248843	6.11862	5.64082	5.15158	0.00111795	2.46732	up
AT2G24820.1	310	306	266	158	152	161	74.6869	68.7263	66.1922	42.0322	37.2785	41.4702	1.04379e-13	-1.17215	down
AT2G25000.1	95	125	101	247	285	284	22.8879	28.0745	25.1331	65.7086	69.8971	73.1524	3.85418e-09	1.06725	up
AT2G25080.1	2167	2412	1945	287	308	269	522.086	541.725	483.999	76.3497	75.5379	69.2887	2.50456e-280	-3.18355	down
AT2G25150.1	0	1	0	7	13	10	0	0.224596	0	1.86219	3.18829	2.57579	0.005615	3.08249	up
AT2G25160.1	7	4	3	27	47	38	1.68648	0.898383	0.746528	7.18273	11.5269	9.78799	4.06411e-05	2.51608	up
AT2G25200.1	74	89	63	8	19	19	17.8285	19.989	15.6771	2.12821	4.65981	4.894	3.16854e-10	-2.49041	down
AT2G25240.1	6	2	1	68	59	77	1.44555	0.449191	0.248843	18.0898	14.4699	19.8336	1.31583e-11	3.91632	up
AT2G25260.1	13	6	9	92	83	78	3.13203	1.34757	2.23958	24.4745	20.356	20.0911	4.08199e-11	2.79169	up
AT2G25450.1	1473	1685	1150	424	462	439	354.883	378.444	286.169	112.795	113.307	113.077	6.99208e-63	-1.96465	down
AT2G25510.1	541	684	542	1425	1752	2073	130.341	153.623	134.873	379.088	429.683	533.961	3.75845e-22	1.29561	up
AT2G25625.1	35	34	32	138	187	175	8.43239	7.63625	7.96297	36.7117	45.8623	45.0763	2.35068e-14	2.0017	up
AT2G25680.1	15	23	14	58	58	54	3.61388	5.1657	3.4838	15.4296	14.2247	13.9093	0.000858894	1.39736	up
AT2G25810.1	7	3	4	42	61	63	1.68648	0.673787	0.995371	11.1731	14.9604	16.2275	1.78156e-08	3.08128	up
AT2G25830.1	88	95	91	51	48	35	21.2014	21.3366	22.6447	13.5674	11.7721	9.01526	1.15147e-05	-1.28578	down
AT2G25900.1	460	591	551	0	41	23	110.826	132.736	137.112	0	10.0554	5.92431	0.00188651	-3.44334	down
AT2G25940.1	4	0	5	21	29	22	0.963702	0	1.24421	5.58656	7.11234	5.66673	0.00258199	2.37665	up
AT2G25980.1	5	7	3	64	60	49	1.20463	1.57217	0.746528	17.0257	14.7152	12.6214	3.8842e-09	3.07561	up
AT2G26310.1	6	4	2	33	32	21	1.44555	0.898383	0.497685	8.77889	7.8481	5.40915	0.00056631	2.34067	up
AT2G26340.1	373	379	312	158	172	146	89.8652	85.1218	77.6389	42.0322	42.1835	37.6065	2.11336e-21	-1.42791	down
AT2G26400.1	1	2	1	39	62	64	0.240926	0.449191	0.248843	10.375	15.2057	16.485	1.52012e-10	4.48205	up
AT2G26480.1	0	7	2	42	45	49	0	1.57217	0.497685	11.1731	11.0364	12.6214	4.82589e-07	3.32303	up
AT2G26500.1	5538	6388	5119	1104	1204	1154	1334.25	1434.72	1273.83	293.694	295.285	297.246	0	-2.569	down
AT2G26540.1	71	83	58	30	44	32	17.1057	18.6414	14.4329	7.98081	10.7911	8.24252	0.000239035	-1.24816	down
AT2G26580.1	95	101	85	48	58	46	22.8879	22.6842	21.1516	12.7693	14.2247	11.8486	2.93592e-05	-1.14582	down
AT2G26695.1	13	12	16	0	0	0	3.13203	2.69515	3.98148	0	0	0	1.53352e-05	-4.56421	down
AT2G26930.1	117	111	114	36	50	38	28.1883	24.9301	28.3681	9.57697	12.2627	9.78799	1.36669e-10	-1.71904	down
AT2G26975.1	358	402	342	190	243	190	86.2513	90.2875	85.1042	50.5451	59.5965	48.94	2.97499e-14	-1.09387	down
AT2G26980.1	56	18	24	0	0	0	13.4918	4.04272	5.97222	0	0	0	7.81676e-09	-5.60138	down
AT2G26980.3	429	491	432	9	8	10	103.357	110.276	107.5	2.39424	1.96202	2.57579	3.04547e-85	-5.80285	down
AT2G27030.3	33	35	31	100	111	96	7.95054	7.86085	7.71412	26.6027	27.2231	24.7276	5.56796e-06	1.33614	up
AT2G27080.2	5	4	4	26	30	35	1.20463	0.898383	0.995371	6.9167	7.35759	9.01526	0.000206334	2.3385	up
AT2G27290.1	535	538	466	209	259	258	128.895	120.832	115.961	55.5996	63.5205	66.4553	2.9663e-25	-1.35453	down
AT2G27370.1	16	21	18	68	108	86	3.85481	4.71651	4.47917	18.0898	26.4873	22.1518	1.70283e-07	1.9225	up
AT2G27385.1	204	449	246	82	156	144	49.1488	100.843	61.2153	21.8142	38.2595	37.0913	1.76604e-06	-1.47225	down
AT2G27389.1	16	19	22	91	106	137	3.85481	4.26732	5.47454	24.2084	25.9968	35.2883	2.16084e-10	2.22075	up
AT2G27402.1	310	285	333	151	163	152	74.6869	64.0098	82.8646	40.1701	39.9762	39.152	1.35577e-14	-1.26593	down
AT2G27680.1	424	507	403	214	227	201	102.152	113.87	100.284	56.9297	55.6724	51.7733	8.01214e-24	-1.32199	down
AT2G27920.1	24	20	24	105	90	95	5.78221	4.49191	5.97222	27.9328	22.0728	24.47	8.60888e-08	1.77924	up
AT2G28000.1	538	539	504	259	334	285	129.618	121.057	125.417	68.901	81.9145	73.41	3.46219e-20	-1.12269	down
AT2G28120.1	100	108	92	48	55	36	24.0926	24.2563	22.8935	12.7693	13.4889	9.27284	1.28438e-06	-1.36467	down
AT2G28150.1	43	57	36	16	21	21	10.3598	12.802	8.95834	4.25643	5.15031	5.40915	0.000730838	-1.44983	down
AT2G28160.1	2	2	3	14	18	19	0.481851	0.449191	0.746528	3.72438	4.41455	4.894	0.0060376	2.25476	up
AT2G28250.1	0	0	0	13	11	9	0	0	0	3.45835	2.69778	2.31821	0.000718949	3.83253	up
AT2G28250.2	4	6	6	57	76	78	0.963702	1.34757	1.49306	15.1635	18.6392	20.0911	2.05681e-11	3.27311	up
AT2G28440.1	0	0	0	5	8	7	0	0	0	1.33013	1.96202	1.80305	0.00999248	3.15398	up
AT2G28570.1	95	84	62	379	369	374	22.8879	18.866	15.4282	100.824	90.4984	96.3345	4.66113e-25	1.93279	up
AT2G28605.1	141	128	105	27	37	26	33.9705	28.7482	26.1285	7.18273	9.07436	6.69705	1.35467e-15	-2.29374	down
AT2G28660.1	65	88	61	46	45	34	15.6602	19.7644	15.1794	12.2372	11.0364	8.75768	0.00246347	-1.02396	down
AT2G28670.1	21	24	25	67	74	90	5.05944	5.3903	6.22107	17.8238	18.1487	23.1821	9.27142e-05	1.41421	up
AT2G28671.1	47	41	38	124	143	133	11.3235	9.20842	9.45602	32.9873	35.0712	34.258	1.70283e-07	1.37183	up
AT2G28690.1	2	1	2	24	28	31	0.481851	0.224596	0.497685	6.38464	6.86708	7.98494	1.18989e-05	3.30152	up
AT2G28720.1	529	645	529	301	358	332	127.45	144.864	131.638	80.0741	87.8006	85.5162	1.00669e-19	-1.051	down
AT2G28760.2	3	5	3	56	61	60	0.722777	1.12298	0.746528	14.8975	14.9604	15.4547	1.19362e-10	3.50087	up
AT2G28780.1	3	4	1	31	23	17	0.722777	0.898383	0.248843	8.24683	5.64082	4.37884	0.000824604	2.55463	up
AT2G28790.1	53	40	46	157	169	180	12.7691	8.98383	11.4468	41.7662	41.4478	46.3642	3.18212e-10	1.56702	up
AT2G28960.1	4	2	1	23	33	19	0.963702	0.449191	0.248843	6.11862	8.09335	4.894	0.00027531	2.76762	up
AT2G28970.1	0	0	1	8	10	11	0	0	0.248843	2.12821	2.45253	2.83337	0.00640967	3.03898	up
AT2G28990.1	3	1	1	15	17	24	0.722777	0.224596	0.248843	3.9904	4.1693	6.18189	0.00137667	2.72514	up
AT2G29070.2	23	38	30	104	134	136	5.54129	8.53463	7.46528	27.6668	32.8639	35.0307	1.02655e-08	1.73593	up
AT2G29100.1	0	0	0	10	15	10	0	0	0	2.66027	3.6788	2.57579	0.000520543	3.90223	up
AT2G29120.1	31	22	13	70	58	69	7.46869	4.9411	3.23496	18.6219	14.2247	17.7729	0.00405049	1.26503	up
AT2G29180.1	154	163	147	55	56	71	37.1025	36.6091	36.5799	14.6315	13.7342	18.2881	2.10236e-12	-1.60603	down
AT2G29290.2	135	145	130	22	26	23	32.5249	32.5664	32.3496	5.85259	6.37658	5.92431	3.6917e-24	-2.76129	down
AT2G29300.1	10	10	7	0	0	0	2.40926	2.24596	1.7419	0	0	0	0.000397126	-3.97872	down
AT2G29310.1	126	92	91	21	17	22	30.3566	20.6628	22.6447	5.58656	4.1693	5.66673	2.39458e-14	-2.57927	down
AT2G29320.1	117	138	111	55	62	72	28.1883	30.9942	27.6215	14.6315	15.2057	18.5457	1.05022e-06	-1.21065	down
AT2G29340.2	401	504	397	135	130	150	96.6111	113.196	98.7905	35.9136	31.8829	38.6368	1.09533e-36	-1.90932	down
AT2G29340.3	26	30	19	2	3	4	6.26406	6.73787	4.72801	0.532054	0.735759	1.03032	8.57477e-06	-3.01236	down
AT2G29350.1	0	6	0	54	79	78	0	1.34757	0	14.3655	19.375	20.0911	1.94043e-11	4.39126	up
AT2G29360.1	179	194	181	77	101	87	43.1257	43.5716	45.0405	20.4841	24.7706	22.4094	1.33308e-11	-1.33032	down
AT2G29370.1	5	5	1	41	55	44	1.20463	1.12298	0.248843	10.9071	13.4889	11.3335	1.23874e-07	3.14588	up
AT2G29420.1	160	164	157	93	82	101	38.5481	36.8337	39.0683	24.7405	20.1107	26.0155	6.39314e-07	-1.06452	down
AT2G29440.1	6	5	6	40	59	61	1.44555	1.12298	1.49306	10.6411	14.4699	15.7123	8.70089e-08	2.79172	up
AT2G29450.1	143	161	139	65	78	58	34.4524	36.1599	34.5891	17.2917	19.1297	14.9396	4.09293e-10	-1.40137	down
AT2G29460.1	7	10	6	45	56	54	1.68648	2.24596	1.49306	11.9712	13.7342	13.9093	1.12443e-06	2.36643	up
AT2G29750.1	13	9	13	178	213	199	3.13203	2.02136	3.23496	47.3528	52.2389	51.2582	1.53221e-31	3.71466	up
AT2G29950.1	10	16	14	43	54	48	2.40926	3.59353	3.4838	11.4392	13.2437	12.3638	0.000857177	1.52574	up
AT2G29990.1	9	14	15	89	86	106	2.16833	3.14434	3.73264	23.6764	21.0918	27.3034	2.82433e-11	2.53865	up
AT2G30040.1	72	67	64	26	41	53	17.3466	15.0479	15.9259	6.9167	10.0554	13.6517	0.00783786	-1.01176	down
AT2G30170.2	46	54	48	2	22	11	11.0826	12.1282	11.9444	0.532054	5.39557	2.83337	0.00018302	-2.2172	down
AT2G30210.1	29	21	29	121	122	122	6.98684	4.71651	7.21644	32.1892	29.9209	31.4246	3.30325e-10	1.89496	up
AT2G30340.1	3	1	4	16	21	21	0.722777	0.224596	0.995371	4.25643	5.15031	5.40915	0.00457357	2.26021	up
AT2G30390.1	111	109	116	67	63	56	26.7427	24.4809	28.8658	17.8238	15.4509	14.4244	1.07728e-05	-1.11574	down
AT2G30490.1	139	164	137	411	458	506	33.4886	36.8337	34.0914	109.337	112.326	130.335	2.56124e-19	1.36534	up
AT2G30520.1	399	437	360	191	149	137	96.1293	98.1483	89.5834	50.8111	36.5427	35.2883	9.71414e-21	-1.58596	down
AT2G30550.2	40	64	54	292	261	262	9.63702	14.3741	13.4375	77.6798	64.011	67.4856	3.04606e-21	2.07784	up
AT2G30570.1	10199	10698	8783	1574	1770	1619	2457.2	2402.72	2185.59	418.726	434.098	417.02	0	-2.85146	down
AT2G30600.3	22	27	17	0	2	0	5.30036	6.06408	4.23033	0	0.490506	0	1.11768e-06	-4.24473	down
AT2G30750.1	49	81	55	149	140	207	11.8054	18.1922	13.6863	39.638	34.3354	53.3188	0.000108072	1.14221	up
AT2G30950.1	223	282	209	86	107	102	53.7264	63.336	52.0081	22.8783	26.2421	26.273	4.50779e-16	-1.53526	down
AT2G31090.1	35	48	34	74	113	104	8.43239	10.7806	8.46065	19.686	27.7136	26.7882	0.00208777	1.02145	up
AT2G31110.2	24	31	19	245	271	295	5.78221	6.96247	4.72801	65.1766	66.4636	75.9857	2.9179e-36	3.14169	up
AT2G31130.1	30	28	25	78	73	71	7.22777	6.28868	6.22107	20.7501	17.9035	18.2881	0.00131754	1.12216	up
AT2G31170.2	107	107	96	76	54	49	25.779	24.0317	23.8889	20.218	13.2437	12.6214	0.000391666	-1.04641	down
AT2G31230.1	10	14	11	53	52	49	2.40926	3.14434	2.73727	14.0994	12.7532	12.6214	5.95872e-05	1.79782	up
AT2G31390.1	189	205	184	959	1125	1151	45.5349	46.0421	45.7871	255.12	275.91	296.473	1.22366e-82	2.20389	up
AT2G31865.2	12	9	0	73	80	85	2.89111	2.02136	0	19.42	19.6202	21.8942	2.83211e-08	3.03767	up
AT2G31880.1	170	176	158	449	484	464	40.9573	39.5288	39.3171	119.446	118.702	119.517	1.44417e-19	1.19238	up
AT2G31890.1	239	267	203	132	127	149	57.5812	59.967	50.5151	35.1155	31.1471	38.3792	7.98774e-09	-1.05979	down
AT2G31945.1	56	85	56	13	18	14	13.4918	19.0906	13.9352	3.45835	4.41455	3.6061	3.59601e-09	-2.32537	down
AT2G31990.1	4	4	2	32	31	11	0.963702	0.898383	0.497685	8.51286	7.60284	2.83337	0.00276181	2.31681	up
AT2G32100.1	57	42	53	19	21	23	13.7328	9.43302	13.1887	5.05451	5.15031	5.92431	0.000219255	-1.50543	down
AT2G32150.1	325	411	349	161	194	197	78.3008	92.3088	86.8461	42.8303	47.5791	50.743	1.09995e-16	-1.24182	down
AT2G32160.3	1	0	2	8	19	14	0.240926	0	0.497685	2.12821	4.65981	3.6061	0.00612909	2.72278	up
AT2G32180.1	239	246	213	97	95	113	57.5812	55.2505	53.0035	25.8046	23.299	29.1064	2.16366e-15	-1.45675	down
AT2G32230.1	156	165	147	73	94	85	37.5844	37.0583	36.5799	19.42	23.0538	21.8942	3.52898e-08	-1.15914	down
AT2G32270.1	9	19	11	124	150	148	2.16833	4.26732	2.73727	32.9873	36.788	38.1217	2.30587e-19	3.08856	up
AT2G32480.1	151	161	130	45	77	67	36.3798	36.1599	32.3496	11.9712	18.8845	17.2578	4.25088e-09	-1.48448	down
AT2G32487.1	7	7	6	38	46	63	1.68648	1.57217	1.49306	10.109	11.2816	16.2275	2.77099e-06	2.46329	up
AT2G32500.1	87	78	59	29	15	23	20.9605	17.5185	14.6817	7.71478	3.6788	5.92431	4.35586e-07	-1.94982	down
AT2G32540.1	58	88	72	44	44	29	13.9737	19.7644	17.9167	11.7052	10.7911	7.46979	0.00112423	-1.14328	down
AT2G32560.1	46	38	27	95	112	123	11.0826	8.53463	6.71875	25.2726	27.4683	31.6822	6.59631e-05	1.27373	up
AT2G32650.1	446	505	425	210	224	183	107.453	113.421	105.758	55.8656	54.9367	47.1369	1.44487e-27	-1.42529	down
AT2G32680.1	0	1	0	12	13	16	0	0.224596	0	3.19232	3.18829	4.12126	0.000667976	3.53633	up
AT2G32690.1	129	142	113	72	73	64	31.0794	31.8926	28.1192	19.1539	17.9035	16.485	1.16035e-06	-1.13795	down
AT2G32870.1	64	61	46	3	3	1	15.4192	13.7003	11.4468	0.798081	0.735759	0.257579	4.02892e-14	-4.48723	down
AT2G32880.1	51	58	95	23	35	31	12.2872	13.0265	23.6401	6.11862	8.58386	7.98494	0.00048	-1.43871	down
AT2G32970.1	0	0	0	23	18	23	0	0	0	6.11862	4.41455	5.92431	4.56489e-06	4.72613	up
AT2G32970.2	32	45	36	0	0	0	7.70962	10.1068	8.95834	0	0	0	1.87952e-10	-5.92781	down
AT2G32990.1	5	5	6	52	51	55	1.20463	1.12298	1.49306	13.8334	12.5079	14.1668	2.38993e-08	2.86644	up
AT2G33050.1	48	45	32	102	143	117	11.5644	10.1068	7.96297	27.1347	35.0712	30.1367	3.04403e-05	1.23692	up
AT2G33180.1	198	193	176	69	78	57	47.7033	43.347	43.7963	18.3559	19.1297	14.682	1.61045e-16	-1.73574	down
AT2G33210.2	15	33	22	119	97	79	3.61388	7.41166	5.47454	31.6572	23.7895	20.3487	3.41107e-06	1.76361	up
AT2G33250.1	181	185	187	79	88	78	43.6075	41.5502	46.5336	21.0161	21.5823	20.0911	2.06373e-13	-1.43994	down
AT2G33430.1	91	98	89	51	37	33	21.9242	22.0104	22.147	13.5674	9.07436	8.5001	2.10459e-06	-1.44499	down
AT2G33450.1	1158	1197	982	421	462	416	278.992	268.841	244.364	111.997	113.307	107.153	5.88463e-65	-1.6316	down
AT2G33530.1	23	23	14	76	91	75	5.54129	5.1657	3.4838	20.218	22.318	19.3184	3.35705e-06	1.6949	up
AT2G33770.1	80	98	109	464	549	510	19.274	22.0104	27.1239	123.436	134.644	131.365	1.10141e-39	2.11965	up
AT2G33790.1	40	27	50	114	138	91	9.63702	6.06408	12.4421	30.3271	33.8449	23.4397	0.000450354	1.23543	up
AT2G33800.1	799	833	751	235	275	213	192.5	187.088	186.881	62.5163	67.4446	54.8643	2.83449e-71	-1.9914	down
AT2G33810.1	63	65	52	17	9	9	15.1783	14.5987	12.9398	4.52246	2.20728	2.31821	3.89056e-09	-2.53276	down
AT2G33830.2	11362	12951	11740	919	842	800	2737.4	2908.74	2921.41	244.479	206.503	206.063	0	-4.08367	down
AT2G33850.1	31	24	18	113	122	106	7.46869	5.3903	4.47917	30.061	29.9209	27.3034	2.05027e-09	1.90964	up
AT2G33855.1	177	213	182	39	57	33	42.6438	47.8389	45.2894	10.375	13.9794	8.5001	2.76929e-23	-2.39622	down
AT2G33860.1	74	82	76	37	37	33	17.8285	18.4168	18.912	9.84299	9.07436	8.5001	6.97492e-06	-1.3665	down
AT2G34020.1	4	8	4	40	33	33	0.963702	1.79677	0.995371	10.6411	8.09335	8.5001	0.00010551	2.2993	up
AT2G34140.1	17	22	23	56	77	69	4.09573	4.9411	5.72338	14.8975	18.8845	17.7729	0.000314555	1.3888	up
AT2G34150.1	3	11	5	37	41	39	0.722777	2.47055	1.24421	9.84299	10.0554	10.0456	0.000148058	2.20955	up
AT2G34310.1	16	24	15	5	4	3	3.85481	5.3903	3.73264	1.33013	0.981012	0.772736	0.00185547	-2.22528	down
AT2G34420.1	68844	71460	68178	13545	14644	12427	16586.3	16049.6	16965.6	3603.33	3591.49	3200.93	0	-2.63454	down
AT2G34430.1	23415	25863	23174	872	1084	928	5641.27	5808.72	5766.68	231.975	265.854	239.033	0	-4.92329	down
AT2G34460.1	287	304	255	90	103	104	69.1456	68.2771	63.4549	23.9424	25.2611	26.7882	6.1059e-26	-1.77335	down
AT2G34600.1	24	15	21	4	5	6	5.78221	3.36893	5.2257	1.06411	1.22627	1.54547	0.00216663	-2.08934	down
AT2G34620.1	88	92	75	29	25	15	21.2014	20.6628	18.6632	7.71478	6.13133	3.86368	1.17666e-09	-2.10718	down
AT2G34640.1	285	242	224	113	120	117	68.6638	54.3521	55.7408	30.061	29.4304	30.1367	1.3977e-13	-1.36855	down
AT2G34960.1	12	3	14	40	37	41	2.89111	0.673787	3.4838	10.6411	9.07436	10.5607	0.00793754	1.62294	up
AT2G35020.1	59	69	62	171	191	183	14.2146	15.4971	15.4282	45.4906	46.8433	47.1369	8.79826e-09	1.23536	up
AT2G35120.1	139	147	142	593	748	705	33.4886	33.0156	35.3357	157.754	183.449	181.593	2.32092e-48	1.97275	up
AT2G35260.1	202	214	211	73	84	78	48.667	48.0635	52.5058	19.42	20.6013	20.0911	5.53109e-19	-1.67957	down
AT2G35300.1	140	72	178	63	26	36	33.7296	16.1709	44.294	16.7597	6.37658	9.27284	3.46368e-05	-1.85119	down
AT2G35370.1	1163	1268	1008	341	373	370	280.196	284.787	250.833	90.7152	91.4794	95.3042	3.06868e-86	-1.93379	down
AT2G35380.1	5	4	2	82	74	99	1.20463	0.898383	0.497685	21.8142	18.1487	25.5003	1.05849e-14	4.01285	up
AT2G35380.2	0	0	0	7	6	7	0	0	0	1.86219	1.47152	1.80305	0.00949538	3.16889	up
AT2G35390.2	78	94	71	44	32	42	18.7922	21.112	17.6678	11.7052	7.8481	10.8183	5.51516e-05	-1.2841	down
AT2G35410.1	330	310	248	94	106	92	79.5054	69.6247	61.713	25.0065	25.9968	23.6973	1.48468e-24	-1.86648	down
AT2G35450.1	152	168	142	80	73	65	36.6207	37.7321	35.3357	21.2821	17.9035	16.7426	8.71007e-10	-1.34267	down
AT2G35470.1	124	154	142	86	106	60	29.8748	34.5877	35.3357	22.8783	25.9968	15.4547	0.00016434	-1.00138	down
AT2G35500.1	192	200	175	95	107	83	46.2577	44.9191	43.5475	25.2726	26.2421	21.379	1.19129e-10	-1.25822	down
AT2G35585.1	9	10	10	82	74	95	2.16833	2.24596	2.48843	21.8142	18.1487	24.47	2.00594e-11	2.7456	up
AT2G35660.1	19	19	30	9	6	5	4.57759	4.26732	7.46528	2.39424	1.47152	1.28789	0.0036122	-1.89041	down
AT2G35730.1	1	0	1	16	22	17	0.240926	0	0.248843	4.25643	5.39557	4.37884	0.000155209	3.51754	up
AT2G35760.1	55	61	52	133	158	134	13.2509	13.7003	12.9398	35.3816	38.75	34.5156	1.54303e-05	1.05245	up
AT2G35800.1	108	109	92	36	35	37	26.02	24.4809	22.8935	9.57697	8.58386	9.53042	1.91265e-10	-1.76238	down
AT2G35810.1	46	60	37	244	269	237	11.0826	13.4757	9.20718	64.9106	65.9731	61.0462	9.20486e-22	2.09958	up
AT2G35840.3	3	4	9	26	37	21	0.722777	0.898383	2.23958	6.9167	9.07436	5.40915	0.00501858	1.92614	up
AT2G35860.1	66	77	55	292	241	226	15.9011	17.2939	13.6863	77.6798	59.106	58.2128	1.01213e-13	1.65447	up
AT2G35940.3	16	24	21	47	61	55	3.85481	5.3903	5.2257	12.5033	14.9604	14.1668	0.00839924	1.11075	up
AT2G36000.1	83	99	74	33	36	19	19.9968	22.235	18.4144	8.77889	8.82911	4.894	1.76712e-07	-1.77333	down
AT2G36050.1	84	77	69	31	29	16	20.2377	17.2939	17.1701	8.24683	7.11234	4.12126	4.0262e-07	-1.827	down
AT2G36090.1	14	16	14	161	180	182	3.37296	3.59353	3.4838	42.8303	44.1455	46.8793	9.50568e-27	3.23405	up
AT2G36100.1	17	17	15	68	91	76	4.09573	3.81813	3.73264	18.0898	22.318	19.576	1.81768e-07	1.93174	up
AT2G36145.1	147	160	120	31	36	39	35.4161	35.9353	29.8611	8.24683	8.82911	10.0456	3.73198e-18	-2.25061	down
AT2G36290.1	37	26	26	75	83	84	8.91424	5.83949	6.46991	19.952	20.356	21.6366	0.00114223	1.14044	up
AT2G36330.1	47	41	35	101	137	115	11.3235	9.20842	8.70949	26.8687	33.5997	29.6216	2.37964e-05	1.22347	up
AT2G36430.1	44	64	69	27	36	26	10.6007	14.3741	17.1701	7.18273	8.82911	6.69705	0.0013586	-1.23685	down
AT2G36570.1	2	6	8	42	40	41	0.481851	1.34757	1.99074	11.1731	9.81012	10.5607	1.75363e-05	2.4937	up
AT2G36650.1	4	1	4	30	28	31	0.963702	0.224596	0.995371	7.98081	6.86708	7.98494	7.0291e-05	2.73397	up
AT2G36870.1	95	90	82	217	258	203	22.8879	20.2136	20.4051	57.7278	63.2753	52.2885	1.28605e-07	1.05902	up
AT2G36890.1	6	16	22	51	58	65	1.44555	3.59353	5.47454	13.5674	14.2247	16.7426	0.00120529	1.63203	up
AT2G36910.1	118	134	112	313	306	285	28.4292	30.0958	27.8704	83.2664	75.0474	73.41	5.15021e-10	1.03493	up
AT2G36990.1	193	199	170	51	65	44	46.4986	44.6945	42.3033	13.5674	15.9414	11.3335	1.56861e-20	-2.06781	down
AT2G37025.1	16	25	21	5	3	5	3.85481	5.61489	5.2257	1.33013	0.735759	1.28789	0.000732819	-2.29747	down
AT2G37040.1	496	521	479	1562	1729	1880	119.499	117.014	119.196	415.534	424.042	484.248	4.0762e-59	1.51255	up
AT2G37220.1	2595	2674	2236	805	853	730	625.202	600.569	556.412	214.152	209.201	188.033	7.61866e-128	-1.92317	down
AT2G37330.1	49	64	73	37	33	30	11.8054	14.3741	18.1655	9.84299	8.09335	7.72736	0.00191074	-1.14241	down
AT2G37360.1	6	1	0	17	22	21	1.44555	0.224596	0	4.52246	5.39557	5.40915	0.0078378	2.37662	up
AT2G37450.2	23	20	23	5	4	8	5.54129	4.49191	5.72338	1.33013	0.981012	2.06063	0.00143352	-2.06059	down
AT2G37460.1	8	10	9	34	76	43	1.9274	2.24596	2.23958	9.04491	18.6392	11.0759	7.07212e-05	2.10008	up
AT2G37580.1	7	7	7	42	39	39	1.68648	1.57217	1.7419	11.1731	9.56487	10.0456	5.63862e-05	2.12341	up
AT2G37660.1	1261	1410	1259	498	565	492	303.807	316.68	313.293	132.481	138.568	126.729	9.10563e-92	-1.60988	down
AT2G37710.1	61	84	87	182	225	219	14.6965	18.866	21.6493	48.4169	55.1819	56.4098	3.45044e-07	1.14559	up
AT2G37920.1	139	178	109	64	73	57	33.4886	39.978	27.1239	17.0257	17.9035	14.682	8.10803e-08	-1.38555	down
AT2G38040.1	501	509	512	278	287	287	120.704	114.319	127.407	73.9555	70.3876	73.9251	1.61904e-21	-1.10931	down
AT2G38090.1	8	11	14	38	36	39	1.9274	2.47055	3.4838	10.109	8.82911	10.0456	0.00627907	1.43207	up
AT2G38140.1	1852	1936	1665	572	641	540	446.194	434.817	414.323	152.167	157.207	139.093	3.20845e-126	-1.90925	down
AT2G38170.1	704	782	616	255	242	211	169.612	175.634	153.287	67.8368	59.3512	54.3491	1.40351e-48	-1.8348	down
AT2G38170.2	17	6	18	0	0	0	4.09573	1.34757	4.47917	0	0	0	3.06452e-05	-4.47232	down
AT2G38210.1	27	28	19	5	2	3	6.50499	6.28868	4.72801	1.33013	0.490506	0.772736	2.23356e-05	-2.85979	down
AT2G38230.1	205	212	190	25	28	17	49.3897	47.6143	47.2801	6.65067	6.86708	4.37884	5.31737e-39	-3.34479	down
AT2G38380.1	5	16	18	104	105	130	1.20463	3.59353	4.47917	27.6668	25.7516	33.4852	9.21974e-12	2.7556	up
AT2G38390.1	26	14	23	227	292	251	6.26406	3.14434	5.72338	60.3881	71.6139	64.6523	4.85416e-33	3.27577	up
AT2G38530.1	2107	1888	2247	7965	8063	7655	507.63	424.037	559.15	2118.9	1977.47	1971.77	1.52166e-81	1.64212	up
AT2G38540.1	2612	2835	2375	1388	1488	1406	629.298	636.729	591.001	369.245	364.936	362.156	3.32478e-76	-1.14125	down
AT2G38710.1	121	146	118	420	426	446	29.152	32.791	29.3634	111.731	104.478	114.88	3.66923e-23	1.46903	up
AT2G38710.2	11	14	12	63	52	69	2.65018	3.14434	2.98611	16.7597	12.7532	17.7729	4.43919e-06	1.97417	up
AT2G38740.1	42	61	31	238	315	281	10.1189	13.7003	7.71412	63.3144	77.2547	72.3796	3.11346e-22	2.33972	up
AT2G38820.2	43	68	58	12	8	7	10.3598	15.2725	14.4329	3.19232	1.96202	1.80305	1.07752e-09	-2.789	down
AT2G38940.1	398	371	327	187	243	213	95.8884	83.325	81.3716	49.747	59.5965	54.8643	9.2409e-12	-1.04212	down
AT2G39010.1	893	968	899	473	471	394	215.147	217.409	223.71	125.831	115.514	101.486	3.5423e-39	-1.31592	down
AT2G39040.1	2	10	6	65	83	63	0.481851	2.24596	1.49306	17.2917	20.356	16.2275	4.87156e-10	3.11238	up
AT2G39050.1	17	27	27	129	153	162	4.09573	6.06408	6.71875	34.3175	37.5237	41.7278	5.3469e-15	2.32851	up
AT2G39110.1	3	8	7	42	49	58	0.722777	1.79677	1.7419	11.1731	12.0174	14.9396	9.01125e-07	2.62168	up
AT2G39190.2	78	64	66	36	42	39	18.7922	14.3741	16.4236	9.57697	10.3006	10.0456	0.000913796	-1.08831	down
AT2G39210.1	731	762	708	1635	1920	1967	176.117	171.142	176.181	434.954	470.886	506.658	1.99894e-34	1.0501	up
AT2G39220.1	28	15	19	127	125	140	6.74592	3.36893	4.72801	33.7854	30.6566	36.061	1.13098e-12	2.3307	up
AT2G39250.1	21	26	19	7	8	7	5.05944	5.83949	4.72801	1.86219	1.96202	1.80305	0.00458093	-1.73461	down
AT2G39270.1	78	95	91	206	273	261	18.7922	21.3366	22.6447	54.8015	66.9541	67.2281	2.72208e-09	1.20126	up
AT2G39400.1	550	740	582	338	340	255	132.509	166.201	144.826	89.9171	83.386	65.6826	8.36812e-18	-1.26896	down
AT2G39410.2	3	3	2	18	27	44	0.722777	0.673787	0.497685	4.78848	6.62183	11.3335	9.42578e-05	2.85262	up
AT2G39420.1	43	31	36	243	262	287	10.3598	6.96247	8.95834	64.6445	64.2563	73.9251	6.9078e-28	2.54205	up
AT2G39430.1	24	33	26	124	127	122	5.78221	7.41166	6.46991	32.9873	31.1471	31.4246	7.43069e-11	1.86638	up
AT2G39435.1	4	2	2	16	14	29	0.963702	0.449191	0.497685	4.25643	3.43354	7.46979	0.00514667	2.28064	up
AT2G39470.1	237	296	230	30	38	29	57.0994	66.4803	57.2338	7.98081	9.31961	7.46979	4.73172e-46	-3.21269	down
AT2G39530.1	163	169	149	384	443	490	39.2709	37.9567	37.0776	102.154	108.647	126.214	3.86934e-14	1.17349	up
AT2G39570.1	1376	1472	1429	241	253	214	331.514	330.605	355.596	64.1125	62.049	55.1219	2.07422e-202	-2.86464	down
AT2G39670.1	155	168	131	84	92	78	37.3435	37.7321	32.5984	22.3463	22.5633	20.0911	3.65298e-07	-1.10096	down
AT2G39700.1	37	35	47	138	176	142	8.91424	7.86085	11.6956	36.7117	43.1645	36.5762	1.29258e-09	1.63308	up
AT2G39730.2	6112	6696	5625	1290	1482	1237	1472.54	1503.89	1399.74	343.175	363.465	318.625	0	-2.47305	down
AT2G39730.3	118	158	94	24	42	50	28.4292	35.4861	23.3912	6.38464	10.3006	12.8789	8.36036e-09	-1.90083	down
AT2G39850.1	5	10	13	1	1	0	1.20463	2.24596	3.23496	0.266027	0.245253	0	0.0041718	-3.00601	down
AT2G39890.1	51	63	60	177	208	132	12.2872	14.1495	14.9306	47.0868	51.0126	34.0004	1.09498e-06	1.27742	up
AT2G40000.1	772	780	727	167	202	213	185.995	175.185	180.909	44.4265	49.5411	54.8643	1.06908e-78	-2.23819	down
AT2G40113.1	32	23	32	104	124	106	7.70962	5.1657	7.96297	27.6668	30.4114	27.3034	1.41735e-07	1.62846	up
AT2G40330.1	80	86	65	308	350	329	19.274	19.3152	16.1748	81.9363	85.8386	84.7434	1.21213e-24	1.81015	up
AT2G40370.1	0	1	0	28	24	20	0	0.224596	0	7.44875	5.88607	5.15158	4.45985e-06	4.31753	up
AT2G40400.1	108	148	118	26	29	11	26.02	33.2402	29.3634	6.9167	7.11234	2.83337	1.5486e-15	-2.70986	down
AT2G40420.1	86	99	83	34	29	30	20.7196	22.235	20.6539	9.04491	7.11234	7.72736	3.23541e-09	-1.76616	down
AT2G40475.1	37	32	35	79	97	94	8.91424	7.18706	8.70949	21.0161	23.7895	24.2124	0.00070403	1.07843	up
AT2G40490.1	441	482	426	173	198	198	106.248	108.255	106.007	46.0226	48.5601	51.0006	1.79532e-32	-1.51424	down
AT2G40750.1	9	16	6	50	60	68	2.16833	3.59353	1.49306	13.3013	14.7152	17.5154	5.18827e-06	2.16051	up
AT2G40760.1	85	87	72	30	48	43	20.4787	19.5398	17.9167	7.98081	11.7721	11.0759	5.97723e-05	-1.26595	down
AT2G40890.1	153	183	141	462	450	508	36.8616	41.101	35.0868	122.904	110.364	130.85	3.30146e-18	1.29853	up
AT2G41000.1	11	13	15	37	50	45	2.65018	2.91974	3.73264	9.84299	12.2627	11.591	0.0029165	1.42224	up
AT2G41090.1	260	282	284	771	1064	1023	62.6406	63.336	70.6713	205.107	260.949	263.503	2.93495e-29	1.50674	up
AT2G41180.1	87	101	89	256	292	258	20.9605	22.6842	22.147	68.1029	71.6139	66.4553	1.10207e-12	1.25867	up
AT2G41220.1	69	73	59	254	296	296	16.6239	16.3955	14.6817	67.5708	72.5949	76.2433	8.4593e-21	1.78618	up
AT2G41230.1	96	92	102	215	251	283	23.1289	20.6628	25.382	57.1958	61.5585	72.8948	1.13249e-07	1.08324	up
AT2G41280.1	18	12	26	5	1	0	4.33666	2.69515	6.46991	1.33013	0.245253	0	0.000778704	-2.9348	down
AT2G41380.1	44	40	45	99	122	119	10.6007	8.98383	11.1979	26.3367	29.9209	30.6519	9.82337e-05	1.10344	up
AT2G41430.5	1527	1689	1580	863	1057	692	367.893	379.342	393.171	229.581	259.232	178.245	1.25403e-21	-1.15155	down
AT2G41560.1	235	246	198	46	47	37	56.6175	55.2505	49.2709	12.2372	11.5269	9.53042	8.73023e-34	-2.63171	down
AT2G41680.1	246	301	204	101	126	99	59.2677	67.6033	50.7639	26.8687	30.9019	25.5003	8.16479e-14	-1.46393	down
AT2G41710.3	0	0	0	12	6	4	0	0	0	3.19232	1.47152	1.03032	0.00795605	3.22799	up
AT2G41780.1	30	29	40	102	103	113	7.22777	6.51327	9.95371	27.1347	25.2611	29.1064	8.61809e-06	1.38113	up
AT2G41800.1	31	24	23	129	176	137	7.46869	5.3903	5.72338	34.3175	43.1645	35.2883	8.80054e-14	2.18352	up
AT2G41810.1	2	5	0	32	32	34	0.481851	1.12298	0	8.51286	7.8481	8.75768	1.16383e-05	3.15916	up
AT2G41970.1	5	4	7	31	61	46	1.20463	0.898383	1.7419	8.24683	14.9604	11.8486	3.99553e-06	2.63638	up
AT2G42060.1	17	26	13	100	105	132	4.09573	5.83949	3.23496	26.6027	25.7516	34.0004	1.20644e-10	2.26701	up
AT2G42220.1	1441	1515	1393	307	344	279	347.174	340.262	346.638	81.6702	84.367	71.8645	5.58339e-173	-2.49659	down
AT2G42320.1	108	135	122	77	71	68	26.02	30.3204	30.3588	20.4841	17.413	17.5154	2.43636e-05	-1.01732	down
AT2G42350.1	9	9	13	63	57	69	2.16833	2.02136	3.23496	16.7597	13.9794	17.7729	3.39627e-07	2.24508	up
AT2G42570.1	17	15	35	94	79	82	4.09573	3.36893	8.70949	25.0065	19.375	21.1215	0.000178638	1.59219	up
AT2G42620.1	79	62	77	35	35	25	19.0331	13.9249	19.1609	9.31094	8.58386	6.43947	3.02823e-05	-1.44692	down
AT2G42690.1	98	134	85	37	49	46	23.6107	30.0958	21.1516	9.84299	12.0174	11.8486	2.40179e-07	-1.50801	down
AT2G42770.1	177	175	153	74	95	93	42.6438	39.3042	38.0729	19.686	23.299	23.9548	7.66325e-09	-1.2123	down
AT2G42850.1	7	7	16	48	56	35	1.68648	1.57217	3.98148	12.7693	13.7342	9.01526	0.000817639	1.82181	up
AT2G42870.1	121	111	122	41	50	40	29.152	24.9301	30.3588	10.9071	12.2627	10.3032	1.00754e-10	-1.6909	down
AT2G42890.1	69	55	46	149	144	139	16.6239	12.3528	11.4468	39.638	35.3164	35.8035	6.46454e-05	1.05765	up
AT2G42890.3	0	0	0	13	18	18	0	0	0	3.45835	4.41455	4.63642	4.48945e-05	4.36325	up
AT2G42975.1	81	94	65	42	50	49	19.515	21.112	16.1748	11.1731	12.2627	12.6214	0.000904802	-1.02132	down
AT2G43000.1	3	4	1	62	67	74	0.722777	0.898383	0.248843	16.4937	16.432	19.0608	1.56053e-12	4.06957	up
AT2G43010.1	321	377	365	121	105	73	77.3371	84.6726	90.8276	32.1892	25.7516	18.8033	2.6693e-26	-2.08622	down
AT2G43030.1	746	751	574	216	220	184	179.73	168.671	142.836	57.4618	53.9557	47.3945	5.56436e-47	-2.00428	down
AT2G43040.1	0	1	0	16	10	15	0	0.224596	0	4.25643	2.45253	3.86368	0.000723485	3.5279	up
AT2G43050.1	14	15	28	115	121	85	3.37296	3.36893	6.9676	30.5931	29.6756	21.8942	1.64114e-08	2.14804	up
AT2G43100.1	203	191	199	959	1098	1064	48.9079	42.8978	49.5197	255.12	269.288	274.064	7.96163e-82	2.11365	up
AT2G43120.1	4	6	7	33	42	46	0.963702	1.34757	1.7419	8.77889	10.3006	11.8486	1.82485e-05	2.3997	up
AT2G43150.1	25	46	39	498	371	399	6.02314	10.3314	9.70487	132.481	90.9889	102.774	1.17825e-40	3.22205	up
AT2G43290.1	108	119	113	245	295	342	26.02	26.7269	28.1192	65.1766	72.3496	88.092	1.9773e-08	1.09275	up
AT2G43360.1	163	163	139	89	90	77	39.2709	36.6091	34.5891	23.6764	22.0728	19.8336	1.4508e-07	-1.12516	down
AT2G43390.1	1	2	1	9	11	20	0.240926	0.449191	0.248843	2.39424	2.69778	5.15158	0.00988701	2.48126	up
AT2G43400.1	168	193	141	53	53	38	40.4755	43.347	35.0868	14.0994	12.9984	9.78799	4.37735e-17	-2.0476	down
AT2G43445.1	53	54	69	3	7	2	12.7691	12.1282	17.1701	0.798081	1.71677	0.515158	3.41319e-13	-3.90009	down
AT2G43500.1	0	0	4	30	38	28	0	0	0.995371	7.98081	9.31961	7.21221	5.21107e-06	3.65119	up
AT2G43510.1	128	136	105	770	743	714	30.8385	30.545	26.1285	204.841	182.223	183.911	3.92749e-66	2.31307	up
AT2G43520.1	85	109	69	49	56	51	20.4787	24.4809	17.1701	13.0353	13.7342	13.1365	0.00086453	-1.00614	down
AT2G43530.1	141	112	94	15	27	12	33.9705	25.1547	23.3912	3.9904	6.62183	3.09095	8.45363e-16	-2.88891	down
AT2G43560.1	477	570	461	144	159	167	114.921	128.02	114.716	38.3079	38.9952	43.0157	3.43275e-47	-1.94582	down
AT2G43570.1	14	18	14	121	101	153	3.37296	4.04272	3.4838	32.1892	24.7706	39.4096	4.20734e-14	2.68931	up
AT2G43610.1	60	51	64	208	235	171	14.4555	11.4544	15.9259	55.3336	57.6345	44.046	2.28213e-10	1.5129	up
AT2G43620.1	3452	3730	3445	8604	8944	9349	831.675	837.742	857.263	2288.9	2193.54	2408.1	3.70799e-97	1.06585	up
AT2G43720.1	13	10	10	37	41	37	3.13203	2.24596	2.48843	9.84299	10.0554	9.53042	0.00411875	1.45644	up
AT2G43760.1	117	117	90	16	33	22	28.1883	26.2777	22.3958	4.25643	8.09335	5.66673	1.53909e-13	-2.41597	down
AT2G43850.1	0	0	0	28	31	30	0	0	0	7.44875	7.60284	7.72736	1.62031e-07	5.17065	up
AT2G43880.1	1	0	0	10	20	12	0.240926	0	0	2.66027	4.90506	3.09095	0.000739347	3.52235	up
AT2G43910.1	770	806	656	416	403	394	185.513	181.024	163.241	110.667	98.837	101.486	2.55879e-26	-1.14872	down
AT2G43920.3	21	15	13	4	2	3	5.05944	3.36893	3.23496	1.06411	0.490506	0.772736	0.00187647	-2.40365	down
AT2G44010.1	46	34	39	109	117	93	11.0826	7.63625	9.70487	28.9969	28.6946	23.9548	0.000238275	1.12389	up
AT2G44040.1	120	110	108	69	61	63	28.9111	24.7055	26.875	18.3559	14.9604	16.2275	2.33034e-05	-1.07015	down
AT2G44110.2	3	3	8	44	53	49	0.722777	0.673787	1.99074	11.7052	12.9984	12.6214	2.66801e-07	2.89852	up
AT2G44140.1	306	365	310	79	107	65	73.7232	81.9774	77.1412	21.0161	26.2421	16.7426	8.0467e-32	-2.22596	down
AT2G44280.1	3	0	7	28	41	42	0.722777	0	1.7419	7.44875	10.0554	10.8183	6.1891e-05	2.84676	up
AT2G44300.1	11	10	14	62	74	60	2.65018	2.24596	3.4838	16.4937	18.1487	15.4547	3.89678e-07	2.12977	up
AT2G44450.1	6	10	16	45	59	63	1.44555	2.24596	3.98148	11.9712	14.4699	16.2275	4.40263e-05	2.0085	up
AT2G44480.1	7	26	13	59	53	75	1.68648	5.83949	3.23496	15.6956	12.9984	19.3184	0.000827136	1.68961	up
AT2G44500.2	118	124	149	367	372	332	28.4292	27.8499	37.0776	97.6319	91.2341	85.5162	1.07443e-11	1.16988	up
AT2G44578.1	0	0	1	8	13	10	0	0	0.248843	2.12821	3.18829	2.57579	0.00462833	3.12096	up
AT2G44640.1	163	148	135	82	92	71	39.2709	33.2402	33.5938	21.8142	22.5633	18.2881	5.82181e-07	-1.13041	down
AT2G44650.1	532	572	559	289	304	280	128.172	128.469	139.103	76.8818	74.5569	72.1221	2.23337e-27	-1.2017	down
AT2G44920.1	27	36	39	10	11	0	6.50499	8.08544	9.70487	2.66027	2.69778	0	0.00111532	-2.31822	down
AT2G44920.2	226	256	198	43	44	43	54.4492	57.4965	49.2709	11.4392	10.7911	11.0759	6.04826e-35	-2.63279	down
AT2G44940.1	32	23	25	157	192	171	7.70962	5.1657	6.22107	41.7662	47.0886	44.046	1.51185e-18	2.38458	up
AT2G45170.1	993	1091	1030	604	663	607	239.239	245.034	256.308	160.68	162.603	156.35	3.44531e-36	-1.00613	down
AT2G45170.2	72	83	61	29	28	33	17.3466	18.6414	15.1794	7.71478	6.86708	8.5001	5.58088e-06	-1.50105	down
AT2G45180.1	25049	26281	25342	6145	6105	4924	6034.94	5902.6	6306.17	1634.74	1497.27	1268.32	7.12318e-234	-2.43075	down
AT2G45190.1	89	108	77	28	32	39	21.4424	24.2563	19.1609	7.44875	7.8481	10.0456	3.08042e-08	-1.70616	down
AT2G45200.2	0	0	0	6	8	8	0	0	0	1.59616	1.96202	2.06063	0.00633927	3.28852	up
AT2G45220.1	93	100	105	606	730	835	22.4061	22.4596	26.1285	161.212	179.035	215.078	5.87871e-55	2.57437	up
AT2G45270.1	41	59	49	33	24	26	9.87795	13.2511	12.1933	8.77889	5.88607	6.69705	0.00803387	-1.08008	down
AT2G45290.1	39	55	33	160	216	185	9.3961	12.3528	8.21181	42.5643	52.9746	47.6521	6.2707e-13	1.84688	up
AT2G45560.1	71	68	56	23	22	7	17.1057	15.2725	13.9352	6.11862	5.39557	1.80305	2.60676e-06	-2.09961	down
AT2G45570.1	0	3	0	13	13	13	0	0.673787	0	3.45835	3.18829	3.34852	0.00904053	2.67098	up
AT2G45660.1	84	81	69	30	26	16	20.2377	18.1922	17.1701	7.98081	6.37658	4.12126	5.43696e-08	-1.92621	down
AT2G45680.1	42	39	39	98	136	102	10.1189	8.75923	9.70487	26.0706	33.3544	26.273	5.57666e-05	1.18612	up
AT2G45740.1	21	22	22	2	1	5	5.05944	4.9411	5.47454	0.532054	0.245253	1.28789	6.0904e-05	-2.9287	down
AT2G45740.2	522	522	515	148	171	198	125.763	117.239	128.154	39.372	41.9383	51.0006	1.3883e-39	-1.86033	down
AT2G45750.1	4	3	7	29	24	35	0.963702	0.673787	1.7419	7.71478	5.88607	9.01526	0.000879586	2.1828	up
AT2G45770.1	148	153	128	60	83	70	35.657	34.3631	31.8519	15.9616	20.356	18.0305	2.87787e-08	-1.27352	down
AT2G45850.1	51	72	65	29	27	34	12.2872	16.1709	16.1748	7.71478	6.62183	8.75768	0.000280666	-1.30177	down
AT2G45890.1	3	12	6	24	34	49	0.722777	2.69515	1.49306	6.38464	8.3386	12.6214	0.00284046	1.93278	up
AT2G45920.1	6	9	8	27	31	40	1.44555	2.02136	1.99074	7.18273	7.60284	10.3032	0.00305956	1.7132	up
AT2G46000.1	63	55	56	153	178	167	15.1783	12.3528	13.9352	40.7021	43.655	43.0157	1.1198e-07	1.22698	up
AT2G46130.1	0	0	0	12	5	18	0	0	0	3.19232	1.22627	4.63642	0.000809398	3.82037	up
AT2G46140.1	8	8	14	147	151	136	1.9274	1.79677	3.4838	39.1059	37.0332	35.0307	1.96957e-22	3.48054	up
AT2G46150.1	12	17	13	64	86	108	2.89111	3.81813	3.23496	17.0257	21.0918	27.8185	1.57929e-08	2.27255	up
AT2G46220.1	1090	1224	1175	236	260	257	262.609	274.905	292.39	62.7823	63.7658	66.1978	5.50113e-147	-2.48175	down
AT2G46250.1	123	104	98	35	48	35	29.6338	23.3579	24.3866	9.31094	11.7721	9.01526	1.83087e-09	-1.71429	down
AT2G46400.1	4	8	2	38	27	42	0.963702	1.79677	0.497685	10.109	6.62183	10.8183	0.000111399	2.46772	up
AT2G46430.1	4	12	8	39	50	46	0.963702	2.69515	1.99074	10.375	12.2627	11.8486	6.97644e-05	2.10614	up
AT2G46440.1	19	24	12	54	49	52	4.57759	5.3903	2.98611	14.3655	12.0174	13.3941	0.00826193	1.18896	up
AT2G46450.1	17	17	15	50	60	58	4.09573	3.81813	3.73264	13.3013	14.7152	14.9396	0.000411957	1.45673	up
AT2G46535.1	5	8	11	50	62	62	1.20463	1.79677	2.73727	13.3013	15.2057	15.9699	2.66138e-07	2.46377	up
AT2G46630.1	24	29	23	76	94	78	5.78221	6.51327	5.72338	20.218	23.0538	20.0911	3.03863e-05	1.40215	up
AT2G46650.1	211	238	209	619	695	682	50.8353	53.4538	52.0081	164.671	170.451	175.669	1.11343e-30	1.32353	up
AT2G46820.1	3054	3304	2668	480	545	438	735.787	742.064	663.912	127.693	133.663	112.82	3.25881e-253	-2.89425	down
AT2G46820.2	89	132	96	39	30	44	21.4424	29.6466	23.8889	10.375	7.35759	11.3335	1.8829e-08	-1.71981	down
AT2G46860.1	0	0	0	19	26	13	0	0	0	5.05451	6.37658	3.34852	1.42883e-05	4.55838	up
AT2G46910.1	92	96	70	8	13	11	22.1651	21.5612	17.419	2.12821	3.18829	2.83337	1.11114e-16	-3.18441	down
AT2G47000.1	29	28	33	132	133	140	6.98684	6.28868	8.21181	35.1155	32.6186	36.061	1.72803e-11	1.86558	up
AT2G47140.1	30	42	23	96	99	92	7.22777	9.43302	5.72338	25.5386	24.28	23.6973	7.02369e-05	1.30248	up
AT2G47190.1	2	2	1	17	21	18	0.481851	0.449191	0.248843	4.52246	5.15031	4.63642	0.000895212	2.75322	up
AT2G47200.1	4	12	6	153	154	179	0.963702	2.69515	1.49306	40.7021	37.769	46.1066	1.16732e-25	4.06243	up
AT2G47300.2	10	11	5	0	0	0	2.40926	2.47055	1.24421	0	0	0	0.000617509	-3.88973	down
AT2G47360.1	5	6	5	34	40	49	1.20463	1.34757	1.24421	9.04491	9.81012	12.6214	7.75937e-06	2.50514	up
AT2G47400.1	2530	2802	2405	737	760	688	609.542	629.317	598.467	196.062	186.392	177.214	7.91537e-215	-2.09497	down
AT2G47450.1	504	541	491	161	124	250	121.426	121.506	122.182	42.8303	30.4114	64.3947	7.46232e-15	-1.76967	down
AT2G47460.1	1	0	0	11	19	18	0.240926	0	0	2.9263	4.65981	4.63642	0.000237744	3.72486	up
AT2G47520.1	0	1	2	8	16	24	0	0.224596	0.497685	2.12821	3.92405	6.18189	0.00251882	2.93251	up
AT2G47540.1	9	9	15	112	176	126	2.16833	2.02136	3.73264	29.795	43.1645	32.4549	3.41896e-18	3.26463	up
AT2G47550.1	10	8	7	27	37	29	2.40926	1.79677	1.7419	7.18273	9.07436	7.46979	0.00828165	1.52448	up
AT2G47560.1	12	19	15	4	3	3	2.89111	4.26732	3.73264	1.06411	0.735759	0.772736	0.00422781	-2.1968	down
AT2G47640.2	0	0	0	142	174	88	0	0	0	37.7758	42.674	22.6669	1.84598e-16	7.06102	up
AT2G47700.1	191	162	196	40	66	59	46.0168	36.3845	48.7732	10.6411	16.1867	15.1971	1.26839e-15	-1.99336	down
AT2G47710.1	285	287	319	892	1009	970	68.6638	64.459	79.3808	237.296	247.46	249.851	1.95595e-38	1.40727	up
AT2G47760.2	31	14	20	0	0	0	7.46869	3.14434	4.97685	0	0	0	2.99214e-07	-5.13905	down
AT2G47760.3	0	0	0	35	42	23	0	0	0	9.31094	10.3006	5.92431	6.86107e-08	5.28604	up
AT2G47800.1	15	17	18	102	126	121	3.61388	3.81813	4.47917	27.1347	30.9019	31.167	4.05547e-14	2.47184	up
AT2G47880.1	0	1	0	404	547	464	0	0.224596	0	107.475	134.153	119.517	2.78563e-32	8.29631	up
AT2G47910.2	126	130	118	34	29	33	30.3566	29.1974	29.3634	9.04491	7.11234	8.5001	1.23027e-16	-2.20221	down
AT2G47940.2	303	314	299	111	105	93	73.0004	70.523	74.404	29.529	25.7516	23.9548	5.19058e-29	-1.83178	down
AT2G47950.1	0	0	2	22	21	35	0	0	0.497685	5.85259	5.15031	9.01526	8.29408e-06	3.9676	up
AT2G48020.2	133	105	84	21	25	14	32.0431	23.5825	20.9028	5.58656	6.13133	3.6061	4.09123e-14	-2.63576	down
AT2G48070.1	650	680	557	261	310	272	156.602	152.725	138.605	69.433	76.0284	70.0614	1.10302e-34	-1.43284	down
AT2G48090.1	27	21	23	73	83	82	6.50499	4.71651	5.72338	19.42	20.356	21.1215	3.83136e-05	1.43441	up
AT2G48130.1	48	62	42	356	357	456	11.5644	13.9249	10.4514	94.7056	87.5553	117.456	1.86345e-35	2.64988	up
AT3G01060.1	61	71	45	18	15	18	14.6965	15.9463	11.1979	4.78848	3.6788	4.63642	4.90891e-07	-1.99869	down
AT3G01190.1	51	57	42	447	531	559	12.2872	12.802	10.4514	118.914	130.229	143.987	2.90408e-61	3.06144	up
AT3G01220.1	27	22	31	75	83	80	6.50499	4.9411	7.71412	19.952	20.356	20.6063	0.000305171	1.26471	up
AT3G01440.1	33	53	35	2	3	8	7.95054	11.9036	8.70949	0.532054	0.735759	2.06063	6.09205e-08	-3.22393	down
AT3G01480.1	101	142	81	5	0	0	24.3335	31.8926	20.1563	1.33013	0	0	5.75548e-21	-5.69676	down
AT3G01480.2	50	27	34	0	12	9	12.0463	6.06408	8.46065	0	2.94304	2.31821	0.000659749	-2.44027	down
AT3G01500.3	1862	1994	1364	54	69	57	448.603	447.844	339.421	14.3655	16.9225	14.682	2.78986e-215	-5.09997	down
AT3G01660.1	28	26	24	13	6	10	6.74592	5.83949	5.97222	3.45835	1.47152	2.57579	0.0066218	-1.59468	down
AT3G01720.1	64	85	84	227	271	227	15.4192	19.0906	20.9028	60.3881	66.4636	58.4704	2.66059e-11	1.35107	up
AT3G01730.1	0	0	0	17	21	33	0	0	0	4.52246	5.15031	8.5001	2.43504e-06	4.82564	up
AT3G01920.1	24	26	37	5	10	15	5.78221	5.83949	9.20718	1.33013	2.45253	3.86368	0.00477033	-1.7034	down
AT3G01930.2	46	32	45	95	114	99	11.0826	7.18706	11.1979	25.2726	27.9588	25.5003	0.0012192	1.02328	up
AT3G01990.1	0	0	0	18	19	19	0	0	0	4.78848	4.65981	4.894	1.38594e-05	4.55453	up
AT3G02020.1	0	13	11	152	199	155	0	2.91974	2.73727	40.4361	48.8053	39.9247	0.000171186	3.40047	up
AT3G02040.1	164	190	175	67	72	69	39.5118	42.6732	43.5475	17.8238	17.6582	17.7729	2.58772e-15	-1.60693	down
AT3G02230.1	315	381	374	945	1065	999	75.8915	85.5709	93.0672	251.395	261.194	257.321	1.01118e-32	1.21426	up
AT3G02240.1	45	49	47	189	204	242	10.8416	11.0052	11.6956	50.2791	50.0316	62.3341	6.18708e-16	1.87715	up
AT3G02300.1	20	27	21	63	81	65	4.81851	6.06408	5.2257	16.7597	19.8655	16.7426	0.000388934	1.31317	up
AT3G02450.1	154	163	152	76	73	74	37.1025	36.6091	37.8241	20.218	17.9035	19.0608	1.9785e-10	-1.33442	down
AT3G02480.1	199	174	204	118	82	94	47.9442	39.0796	50.7639	31.3912	20.1107	24.2124	1.58434e-07	-1.2337	down
AT3G02550.1	9	20	22	287	429	469	2.16833	4.49191	5.47454	76.3497	105.214	120.804	2.55827e-43	4.17826	up
AT3G02690.1	130	128	113	40	57	54	31.3203	28.7482	28.1192	10.6411	13.9794	13.9093	1.17893e-09	-1.5539	down
AT3G02730.1	620	652	472	117	136	75	149.374	146.436	117.454	31.1251	33.3544	19.3184	3.43788e-42	-2.66343	down
AT3G02770.1	171	245	167	479	546	527	41.1983	55.0259	41.5567	127.427	133.908	135.744	1.03658e-13	1.13841	up
AT3G02780.1	341	362	348	942	1059	1030	82.1556	81.3036	86.5973	250.597	259.723	265.306	3.21201e-40	1.25054	up
AT3G02885.1	8	13	14	99	126	131	1.9274	2.91974	3.4838	26.3367	30.9019	33.7428	3.49544e-16	2.98597	up
AT3G02910.1	54	63	64	326	374	364	13.01	14.1495	15.9259	86.7248	91.7246	93.7587	1.16873e-35	2.26451	up
AT3G03150.1	537	638	579	187	255	207	129.377	143.292	144.08	49.747	62.5395	53.3188	2.87003e-39	-1.70453	down
AT3G03190.1	5	1	2	33	40	31	1.20463	0.224596	0.497685	8.77889	9.81012	7.98494	5.73218e-06	3.0835	up
AT3G03270.1	0	0	0	5	6	10	0	0	0	1.33013	1.47152	2.57579	0.0085054	3.20409	up
AT3G03270.2	60	48	57	390	517	640	14.4555	10.7806	14.184	103.75	126.796	164.85	6.98487e-38	2.91772	up
AT3G03341.1	31	21	24	10	5	1	7.46869	4.71651	5.97222	2.66027	1.22627	0.257579	0.00141661	-2.28111	down
AT3G03470.1	132	140	123	317	358	375	31.8022	31.4434	30.6077	84.3305	87.8006	96.5921	1.07404e-12	1.1309	up
AT3G03530.1	1	0	2	12	10	18	0.240926	0	0.497685	3.19232	2.45253	4.63642	0.00607658	2.71546	up
AT3G03630.1	58	64	52	22	21	21	13.9737	14.3741	12.9398	5.85259	5.15031	5.40915	4.94057e-06	-1.67136	down
AT3G03650.1	3	1	1	15	11	22	0.722777	0.224596	0.248843	3.9904	2.69778	5.66673	0.00556493	2.50106	up
AT3G03670.1	0	0	0	9	6	13	0	0	0	2.39424	1.47152	3.34852	0.00212353	3.58427	up
AT3G03710.1	53	50	57	16	21	23	12.7691	11.2298	14.184	4.25643	5.15031	5.92431	2.74144e-05	-1.64594	down
AT3G03780.2	285	285	248	1203	1354	1357	68.6638	64.0098	61.713	320.03	332.073	349.534	2.35672e-88	1.97983	up
AT3G03870.2	129	121	169	337	368	366	31.0794	27.1761	42.0544	89.651	90.2531	94.2738	1.75823e-08	1.06631	up
AT3G03910.1	2	1	1	18	18	16	0.481851	0.224596	0.248843	4.78848	4.41455	4.12126	0.000960768	2.86907	up
AT3G03980.1	78	80	77	44	35	53	18.7922	17.9677	19.1609	11.7052	8.58386	13.6517	0.000807202	-1.08291	down
AT3G04000.1	91	120	82	34	61	45	21.9242	26.9515	20.4051	9.04491	14.9604	11.591	2.77241e-05	-1.31593	down
AT3G04010.1	39	31	29	71	87	105	9.3961	6.96247	7.21644	18.8879	21.337	27.0458	0.00161992	1.10888	up
AT3G04030.3	2	0	0	10	13	21	0.481851	0	0	2.66027	3.18829	5.40915	0.00199236	3.13255	up
AT3G04060.1	12	23	14	65	63	59	2.89111	5.1657	3.4838	17.2917	15.4509	15.1971	0.00010864	1.61415	up
AT3G04210.1	10	11	8	65	117	103	2.40926	2.47055	1.99074	17.2917	28.6946	26.5306	6.14139e-12	2.90714	up
AT3G04290.1	89	79	52	257	332	275	21.4424	17.7431	12.9398	68.3689	81.424	70.8342	4.79713e-14	1.6807	up
AT3G04320.1	5	8	5	46	47	35	1.20463	1.79677	1.24421	12.2372	11.5269	9.01526	9.16492e-06	2.41244	up
AT3G04330.1	1	0	0	20	34	42	0.240926	0	0	5.32054	8.3386	10.8183	3.11578e-07	4.66488	up
AT3G04420.1	10	5	5	60	65	47	2.40926	1.12298	1.24421	15.9616	15.9414	12.1062	1.05895e-07	2.68013	up
AT3G04530.1	8	14	9	43	41	36	1.9274	3.14434	2.23958	11.4392	10.0554	9.27284	0.00171773	1.60802	up
AT3G04550.1	270	292	222	92	91	91	65.0499	65.5819	55.2431	24.4745	22.318	23.4397	1.63007e-22	-1.77549	down
AT3G04650.1	66	82	49	30	37	41	15.9011	18.4168	12.1933	7.98081	9.07436	10.5607	0.0023289	-1.1096	down
AT3G04720.1	473	567	456	2766	2705	3055	113.958	127.346	113.472	735.83	663.409	786.903	1.58888e-132	2.23732	up
AT3G04760.1	154	144	115	41	54	50	37.1025	32.3418	28.6169	10.9071	13.2437	12.8789	4.24431e-12	-1.76298	down
AT3G04790.1	375	383	308	148	148	164	90.3471	86.0201	76.6436	39.372	36.2974	42.2429	2.31989e-21	-1.47695	down
AT3G05100.1	56	55	55	34	33	31	13.4918	12.3528	13.6863	9.04491	8.09335	7.98494	0.00470991	-1.01344	down
AT3G05160.1	62	76	54	35	40	34	14.9374	17.0693	13.4375	9.31094	9.81012	8.75768	0.00174751	-1.06628	down
AT3G05290.1	136	150	163	417	458	432	32.7659	33.6893	40.5614	110.933	112.326	111.274	5.49584e-18	1.25996	up
AT3G05390.1	6	1	2	31	25	25	1.44555	0.224596	0.497685	8.24683	6.13133	6.43947	0.000462633	2.57837	up
AT3G05490.1	318	331	368	783	825	945	76.6143	74.3412	91.5741	208.299	202.334	243.412	4.80508e-16	1.04874	up
AT3G05625.1	43	32	26	11	14	9	10.3598	7.18706	6.46991	2.9263	3.43354	2.31821	0.000770299	-1.75954	down
AT3G05680.1	91	98	95	38	28	22	21.9242	22.0104	23.6401	10.109	6.86708	5.66673	1.38844e-09	-1.92364	down
AT3G05690.1	4	7	6	51	56	65	0.963702	1.57217	1.49306	13.5674	13.7342	16.7426	7.95602e-09	2.90829	up
AT3G05730.1	10034	10318	10151	1267	1718	1219	2417.45	2317.38	2526	337.056	421.345	313.989	2.7506e-267	-3.13454	down
AT3G05858.1	1	0	0	31	41	40	0.240926	0	0	8.24683	10.0554	10.3032	2.13195e-08	4.92289	up
AT3G05880.1	5120	5322	5231	1896	2006	1949	1233.54	1195.3	1301.7	504.387	491.978	502.021	3.06053e-239	-1.69593	down
AT3G05890.1	193	170	139	714	939	985	46.4986	38.1813	34.5891	189.943	230.293	253.715	3.33403e-39	2.10558	up
AT3G05920.1	19	20	25	89	125	108	4.57759	4.49191	6.22107	23.6764	30.6566	27.8185	1.31678e-09	2.00611	up
AT3G06035.1	31	27	13	202	242	204	7.46869	6.06408	3.23496	53.7374	59.3512	52.5461	1.31893e-23	2.86661	up
AT3G06080.1	21	20	27	8	8	6	5.05944	4.49191	6.71875	2.12821	1.96202	1.54547	0.00381158	-1.78126	down
AT3G06390.1	30	42	38	95	101	96	7.22777	9.43302	9.45602	25.2726	24.7706	24.7276	0.000227095	1.11776	up
AT3G06435.1	4	4	6	19	31	35	0.963702	0.898383	1.49306	5.05451	7.60284	9.01526	0.00131434	2.13072	up
AT3G06460.1	5	4	5	29	36	33	1.20463	0.898383	1.24421	7.71478	8.82911	8.5001	9.96859e-05	2.35017	up
AT3G06483.1	221	210	179	110	112	114	53.2445	47.1651	44.5428	29.263	27.4683	29.364	2.81719e-09	-1.12625	down
AT3G06730.1	127	169	127	85	81	77	30.5975	37.9567	31.603	22.6123	19.8655	19.8336	4.31152e-06	-1.05779	down
AT3G06750.1	368	352	391	153	164	143	88.6606	79.0577	97.2975	40.7021	40.2215	36.8338	3.1515e-24	-1.54303	down
AT3G06850.1	243	240	234	64	83	62	58.5449	53.903	58.2292	17.0257	20.356	15.9699	4.12482e-26	-2.04097	down
AT3G06850.2	19	20	17	0	0	2	4.57759	4.49191	4.23033	0	0	0.515158	7.28178e-06	-4.01181	down
AT3G06980.1	175	214	177	53	45	52	42.162	48.0635	44.0452	14.0994	11.0364	13.3941	9.28646e-23	-2.16334	down
AT3G07000.1	1	3	3	19	23	15	0.240926	0.673787	0.746528	5.05451	5.64082	3.86368	0.0029165	2.40247	up
AT3G07070.1	1	3	4	44	53	45	0.240926	0.673787	0.995371	11.7052	12.9984	11.591	9.33807e-09	3.55092	up
AT3G07090.1	92	109	104	299	344	363	22.1651	24.4809	25.8796	79.542	84.367	93.5011	7.06288e-17	1.43894	up
AT3G07270.2	0	0	0	39	37	46	0	0	0	10.375	9.07436	11.8486	4.69241e-09	5.57911	up
AT3G07310.1	165	161	128	67	80	63	39.7527	36.1599	31.8519	17.8238	19.6202	16.2275	2.41108e-09	-1.37338	down
AT3G07340.1	25	27	17	77	79	81	6.02314	6.06408	4.23033	20.4841	19.375	20.8639	3.07289e-05	1.47544	up
AT3G07350.1	696	752	709	5	4	10	167.684	168.896	176.429	1.33013	0.981012	2.57579	1.22474e-99	-6.92746	down
AT3G07390.1	14	15	14	42	42	81	3.37296	3.36893	3.4838	11.1731	10.3006	20.8639	0.00134532	1.59758	up
AT3G07425.1	0	1	0	12	15	10	0	0.224596	0	3.19232	3.6788	2.57579	0.00142122	3.3868	up
AT3G07430.1	407	466	398	237	245	224	98.0567	104.662	99.0394	63.0484	60.087	57.6977	4.60151e-19	-1.11727	down
AT3G07520.1	0	0	0	14	17	15	0	0	0	3.72438	4.1693	3.86368	6.92545e-05	4.28676	up
AT3G07600.1	5	7	4	146	167	200	1.20463	1.57217	0.995371	38.8399	40.9573	51.5158	1.52829e-27	4.54845	up
AT3G07650.1	163	197	142	59	77	64	39.2709	44.2453	35.3357	15.6956	18.8845	16.485	1.752e-12	-1.58402	down
AT3G07670.1	59	53	54	24	20	37	14.2146	11.9036	13.4375	6.38464	4.90506	9.53042	0.00197421	-1.26977	down
AT3G07900.1	5	1	3	27	29	35	1.20463	0.224596	0.746528	7.18273	7.11234	9.01526	6.84867e-05	2.75751	up
AT3G07940.1	16	16	9	30	56	48	3.85481	3.59353	2.23958	7.98081	13.7342	12.3638	0.00855271	1.36677	up
AT3G07990.1	24	26	30	90	89	71	5.78221	5.83949	7.46528	23.9424	21.8275	18.2881	0.000100803	1.33845	up
AT3G08010.1	55	82	72	31	47	40	13.2509	18.4168	17.9167	8.24683	11.5269	10.3032	0.00196683	-1.07679	down
AT3G08040.2	8	6	6	33	34	25	1.9274	1.34757	1.49306	8.77889	8.3386	6.43947	0.00244555	1.8028	up
AT3G08720.1	17	11	13	45	50	45	4.09573	2.47055	3.23496	11.9712	12.2627	11.591	0.00206691	1.43564	up
AT3G08740.1	1413	1586	1333	525	505	494	340.428	356.209	331.707	139.664	123.853	127.244	4.99558e-100	-1.77596	down
AT3G08920.1	119	179	139	55	46	54	28.6701	40.2026	34.5891	14.6315	11.2816	13.9093	1.28507e-11	-1.73809	down
AT3G08940.2	1321	1366	1464	247	109	129	318.263	306.798	364.306	65.7086	26.7326	33.2277	8.84803e-17	-3.25466	down
AT3G09010.1	6	12	9	68	69	75	1.44555	2.69515	2.23958	18.0898	16.9225	19.3184	2.07592e-09	2.60202	up
AT3G09020.1	13	18	17	59	66	76	3.13203	4.04272	4.23033	15.6956	16.1867	19.576	1.18405e-05	1.74077	up
AT3G09050.1	143	145	125	68	66	52	34.4524	32.5664	31.1053	18.0898	16.1867	13.3941	3.07015e-09	-1.40906	down
AT3G09162.1	27	36	15	3	4	6	6.50499	8.08544	3.73264	0.798081	0.981012	1.54547	0.000104648	-2.59567	down
AT3G09210.1	337	382	328	119	112	115	81.1919	85.7955	81.6204	31.6572	27.4683	29.6216	1.87885e-34	-1.86004	down
AT3G09220.1	18	25	31	124	107	93	4.33666	5.61489	7.71412	32.9873	26.2421	23.9548	9.56025e-08	1.81555	up
AT3G09490.1	28	44	28	123	132	146	6.74592	9.88221	6.9676	32.7213	32.3734	37.6065	3.28159e-09	1.70822	up
AT3G09520.1	2	2	1	19	15	15	0.481851	0.449191	0.248843	5.05451	3.6788	3.86368	0.00295189	2.56821	up
AT3G09580.1	27	37	31	9	9	7	6.50499	8.31004	7.71412	2.39424	2.20728	1.80305	8.17706e-05	-2.08172	down
AT3G09925.1	2	0	0	16	12	19	0.481851	0	0	4.25643	2.94304	4.894	0.000956461	3.25559	up
AT3G09940.1	26	20	18	162	175	157	6.26406	4.49191	4.47917	43.0964	42.9193	40.4399	2.25403e-20	2.62776	up
AT3G09960.1	2	3	2	18	17	25	0.481851	0.673787	0.497685	4.78848	4.1693	6.43947	0.00157715	2.48723	up
AT3G10020.1	1189	1337	1225	232	186	217	286.46	300.284	304.832	61.7182	45.6171	55.8946	5.9808e-142	-2.82562	down
AT3G10040.1	2	2	7	78	127	162	0.481851	0.449191	1.7419	20.7501	31.1471	41.7278	5.09945e-17	4.47174	up
AT3G10060.1	175	194	124	31	45	45	42.162	43.5716	30.8565	8.24683	11.0364	11.591	5.42043e-17	-2.26384	down
AT3G10230.1	124	163	137	80	83	73	29.8748	36.6091	34.0914	21.2821	20.356	18.8033	8.79836e-07	-1.10606	down
AT3G10320.1	3	7	7	45	51	46	0.722777	1.57217	1.7419	11.9712	12.5079	11.8486	8.01595e-07	2.63103	up
AT3G10405.1	109	134	125	59	41	29	26.2609	30.0958	31.1053	15.6956	10.0554	7.46979	1.66375e-08	-1.74861	down
AT3G10500.1	19	20	23	53	69	66	4.57759	4.49191	5.72338	14.0994	16.9225	17.0002	0.00103185	1.2865	up
AT3G10670.1	119	119	105	63	74	58	28.6701	26.7269	26.1285	16.7597	18.1487	14.9396	1.32471e-05	-1.07864	down
AT3G10710.1	2	3	1	29	46	49	0.481851	0.673787	0.248843	7.71478	11.2816	12.6214	9.03541e-08	3.66598	up
AT3G10720.1	19	17	9	1	0	0	4.57759	3.81813	2.23958	0.266027	0	0	3.58627e-05	-4.07885	down
AT3G10740.1	240	227	236	131	111	117	57.8221	50.9832	58.7269	34.8495	27.2231	30.1367	1.99047e-11	-1.23557	down
AT3G10970.2	280	293	249	149	154	138	67.4592	65.8065	61.9618	39.638	37.769	35.5459	1.57972e-13	-1.16601	down
AT3G11090.1	142	154	110	30	24	34	34.2114	34.5877	27.3727	7.98081	5.88607	8.75768	1.40361e-17	-2.43242	down
AT3G11170.1	609	614	547	227	231	257	146.724	137.902	136.117	60.3881	56.6534	66.1978	8.30614e-39	-1.57627	down
AT3G11340.1	6	15	12	44	44	43	1.44555	3.36893	2.98611	11.7052	10.7911	11.0759	0.00123782	1.64317	up
AT3G11402.2	3	3	1	32	36	33	0.722777	0.673787	0.248843	8.51286	8.82911	8.5001	2.18943e-06	3.22428	up
AT3G11430.1	1	2	4	32	21	32	0.240926	0.449191	0.995371	8.51286	5.15031	8.24252	6.03547e-05	2.95449	up
AT3G11550.1	8	10	8	39	58	57	1.9274	2.24596	1.99074	10.375	14.2247	14.682	6.55575e-06	2.18702	up
AT3G11560.2	217	236	230	113	108	103	52.2808	53.0046	57.2338	30.061	26.4873	26.5306	2.39458e-14	-1.34146	down
AT3G11580.1	6	1	5	24	32	32	1.44555	0.224596	1.24421	6.38464	7.8481	8.24252	0.000661008	2.34803	up
AT3G11630.1	2634	2860	2426	962	1038	896	634.598	642.344	603.692	255.918	254.573	230.791	6.14061e-141	-1.72328	down
AT3G11660.1	102	102	103	294	336	362	24.5744	22.9088	25.6308	78.2119	82.405	93.2435	5.57895e-16	1.40789	up
AT3G11930.3	424	394	461	192	238	250	102.152	88.4907	114.716	51.0772	58.3702	64.3947	7.80585e-14	-1.18548	down
AT3G12240.1	0	0	0	5	11	6	0	0	0	1.33013	2.69778	1.54547	0.00733712	3.24841	up
AT3G12345.1	820	843	665	159	175	131	197.559	189.334	165.48	42.2983	42.9193	33.7428	3.60622e-78	-2.58707	down
AT3G12500.1	38	53	47	195	216	267	9.15517	11.9036	11.6956	51.8752	52.9746	68.7735	2.21324e-16	2.0013	up
AT3G12560.1	53	39	46	105	120	120	12.7691	8.75923	11.4468	27.9328	29.4304	30.9095	0.000392705	1.02698	up
AT3G12685.1	37	51	34	22	25	15	8.91424	11.4544	8.46065	5.85259	6.13133	3.86368	0.00870687	-1.20358	down
AT3G12700.2	13	31	18	91	109	108	3.13203	6.96247	4.47917	24.2084	26.7326	27.8185	3.45114e-08	1.99515	up
AT3G12780.1	3212	3487	2793	826	965	880	773.853	783.165	695.018	219.738	236.669	226.669	1.25806e-172	-2.1001	down
AT3G12930.1	170	194	186	77	80	89	40.9573	43.5716	46.2847	20.4841	19.6202	22.9245	1.15567e-12	-1.42284	down
AT3G13050.1	8	14	26	64	56	58	1.9274	3.14434	6.46991	17.0257	13.7342	14.9396	0.00202394	1.54277	up
AT3G13060.2	77	54	65	257	292	280	18.5513	12.1282	16.1748	68.3689	71.6139	72.1221	1.37917e-17	1.78463	up
AT3G13080.1	84	77	68	171	216	206	20.2377	17.2939	16.9213	45.4906	52.9746	53.0612	5.87294e-07	1.0861	up
AT3G13120.1	1261	1172	891	368	453	230	303.807	263.226	221.719	97.8979	111.1	59.2431	3.11478e-22	-1.92436	down
AT3G13120.2	1010	1225	1154	462	439	579	243.335	275.13	287.164	122.904	107.666	149.138	2.74608e-30	-1.4606	down
AT3G13160.1	27	45	27	74	86	90	6.50499	10.1068	6.71875	19.686	21.0918	23.1821	0.00310113	1.04741	up
AT3G13380.1	12	8	8	38	60	56	2.89111	1.79677	1.99074	10.109	14.7152	14.4244	2.38922e-05	2.07752	up
AT3G13404.1	25	15	12	2	4	4	6.02314	3.36893	2.98611	0.532054	0.981012	1.03032	0.00218401	-2.35963	down
AT3G13435.1	40	31	24	144	132	140	9.63702	6.96247	5.97222	38.3079	32.3734	36.061	3.67126e-10	1.82697	up
AT3G13450.1	127	113	110	32	31	35	30.5975	25.3793	27.3727	8.51286	7.60284	9.01526	4.13176e-14	-2.07978	down
AT3G13460.1	344	449	365	215	232	188	82.8784	100.843	90.8276	57.1958	56.8987	48.4248	1.91836e-14	-1.13337	down
AT3G13610.1	13	24	0	309	303	360	3.13203	5.3903	0	82.2023	74.3117	92.7284	0.00103217	3.38542	up
AT3G13620.1	18	14	6	43	64	50	4.33666	3.14434	1.49306	11.4392	15.6962	12.8789	0.000803987	1.68961	up
AT3G13650.1	15	13	28	282	334	356	3.61388	2.91974	6.9676	75.0196	81.9145	91.6981	3.22486e-41	3.77231	up
AT3G13740.1	105	105	92	27	29	26	25.2972	23.5825	22.8935	7.18273	7.11234	6.69705	3.08751e-13	-2.11892	down
AT3G13750.1	1387	1745	1218	235	275	222	334.164	391.919	303.09	62.5163	67.4446	57.1825	1.37709e-117	-2.83187	down
AT3G13782.1	0	0	1	12	14	9	0	0	0.248843	3.19232	3.43354	2.31821	0.00215676	3.29365	up
AT3G13910.1	110	129	146	349	335	368	26.5018	28.9728	36.331	92.8434	82.1598	94.789	3.63904e-11	1.16913	up
AT3G13950.1	11	8	6	32	49	52	2.65018	1.79677	1.49306	8.51286	12.0174	13.3941	0.000140771	2.02079	up
AT3G14060.1	19	10	11	57	58	82	4.57759	2.24596	2.73727	15.1635	14.2247	21.1215	1.83512e-05	1.94435	up
AT3G14067.1	174	176	169	515	568	534	41.921	39.5288	42.0544	137.004	139.304	137.547	2.89796e-27	1.35971	up
AT3G14110.1	258	286	244	149	116	73	62.1588	64.2344	60.7176	39.638	28.4493	18.8033	3.64233e-09	-1.47342	down
AT3G14210.1	360	342	336	182	174	167	86.7332	76.8117	83.6111	48.4169	42.674	43.0157	9.86227e-18	-1.25854	down
AT3G14280.1	32	37	33	270	292	295	7.70962	8.31004	8.21181	71.8273	71.6139	75.9857	1.49474e-37	2.76982	up
AT3G14360.1	7	6	7	27	30	27	1.68648	1.34757	1.7419	7.18273	7.35759	6.95463	0.0054348	1.67901	up
AT3G14370.1	14	14	27	163	185	144	3.37296	3.14434	6.71875	43.3624	45.3718	37.0913	5.60836e-18	2.81565	up
AT3G14380.1	0	0	0	18	17	9	0	0	0	4.78848	4.1693	2.31821	0.000126028	4.18692	up
AT3G14420.1	1331	1444	1074	200	265	214	320.672	324.316	267.257	53.2054	64.992	55.1219	7.733e-111	-2.76785	down
AT3G14610.1	137	155	130	353	386	340	33.0068	34.8123	32.3496	93.9075	94.6677	87.5768	8.17726e-13	1.07599	up
AT3G14650.1	159	192	162	104	92	109	38.3072	43.1224	40.3125	27.6668	22.5633	28.0761	9.97372e-07	-1.01141	down
AT3G14660.1	121	118	117	64	58	52	29.152	26.5023	29.1146	17.0257	14.2247	13.3941	2.07185e-07	-1.2922	down
AT3G14680.1	6	12	11	117	134	112	1.44555	2.69515	2.73727	31.1251	32.8639	28.8488	1.82006e-18	3.27358	up
AT3G14700.1	5	7	9	27	30	30	1.20463	1.57217	2.23958	7.18273	7.35759	7.72736	0.00587525	1.66266	up
AT3G14770.1	47	58	42	9	10	9	11.3235	13.0265	10.4514	2.39424	2.45253	2.31821	1.30702e-08	-2.5552	down
AT3G14850.2	3	12	2	47	43	45	0.722777	2.69515	0.497685	12.5033	10.5459	11.591	3.53164e-05	2.53826	up
AT3G14930.1	237	293	235	81	85	77	57.0994	65.8065	58.478	21.5482	20.8465	19.8336	4.95214e-26	-1.91264	down
AT3G14930.2	177	212	182	78	80	85	42.6438	47.6143	45.2894	20.7501	19.6202	21.8942	2.42491e-14	-1.49268	down
AT3G14940.1	11	22	20	116	116	122	2.65018	4.9411	4.97685	30.8591	28.4493	31.4246	6.83037e-13	2.41364	up
AT3G15110.1	166	169	150	75	96	98	39.9936	37.9567	37.3264	19.952	23.5443	25.2427	1.50873e-07	-1.11637	down
AT3G15190.1	695	716	592	222	216	249	167.443	160.81	147.315	59.058	52.9746	64.1371	5.03462e-47	-1.80933	down
AT3G15210.1	149	141	148	394	440	502	35.8979	31.668	36.8287	104.815	107.911	129.305	2.22965e-16	1.32594	up
AT3G15300.1	18	12	13	56	55	74	4.33666	2.69515	3.23496	14.8975	13.4889	19.0608	4.64097e-05	1.76585	up
AT3G15357.1	28	24	19	86	88	65	6.74592	5.3903	4.72801	22.8783	21.5823	16.7426	8.03978e-05	1.4402	up
AT3G15360.1	1862	1890	1616	536	623	639	448.603	424.486	402.13	142.59	152.793	164.593	5.39756e-97	-1.84923	down
AT3G15440.1	8	11	16	0	1	0	1.9274	2.47055	3.98148	0	0.245253	0	0.000286363	-3.74421	down
AT3G15450.1	1840	2112	1767	47	28	30	443.303	474.346	439.705	12.5033	6.86708	7.72736	2.13895e-301	-6.00373	down
AT3G15450.2	304	402	258	0	13	0	73.2414	90.2875	64.2014	0	3.18829	0	0.00617328	-3.35766	down
AT3G15460.1	33	34	32	70	88	87	7.95054	7.63625	7.96297	18.6219	21.5823	22.4094	0.00223541	1.01195	up
AT3G15500.1	9	14	24	3	4	3	2.16833	3.14434	5.97222	0.798081	0.981012	0.772736	0.00614291	-2.21146	down
AT3G15520.1	134	135	99	37	36	34	32.284	30.3204	24.6354	9.84299	8.82911	8.75768	1.69194e-13	-2.02249	down
AT3G15540.1	6	10	20	45	45	45	1.44555	2.24596	4.97685	11.9712	11.0364	11.591	0.00522499	1.54158	up
AT3G15570.1	74	77	56	13	16	21	17.8285	17.2939	13.9352	3.45835	3.92405	5.40915	2.93039e-09	-2.25485	down
AT3G15620.1	49	82	58	0	5	0	11.8054	18.4168	14.4329	0	1.22627	0	5.3827e-14	-4.93891	down
AT3G15630.1	1838	1926	1715	180	142	139	442.821	432.571	426.765	47.8848	34.8259	35.8035	3.45017e-266	-3.83302	down
AT3G15670.1	17	10	14	1	1	2	4.09573	2.24596	3.4838	0.266027	0.245253	0.515158	0.000684478	-3.01379	down
AT3G15770.2	134	155	148	87	82	79	32.284	34.8123	36.8287	23.1443	20.1107	20.3487	6.13739e-07	-1.08059	down
AT3G15810.1	253	279	249	619	665	720	60.9542	62.6622	61.9618	164.671	163.093	185.457	1.00266e-19	1.08336	up
AT3G15850.1	482	533	465	98	98	85	116.126	119.709	115.712	26.0706	24.0348	21.8942	1.12802e-75	-2.65825	down
AT3G15900.1	147	160	142	43	52	55	35.4161	35.9353	35.3357	11.4392	12.7532	14.1668	2.08316e-15	-1.83601	down
AT3G15940.2	43	55	34	116	125	87	10.3598	12.3528	8.46065	30.8591	30.6566	22.4094	0.0012671	1.02494	up
AT3G16000.1	350	397	311	166	163	163	84.3239	89.1645	77.3901	44.1605	39.9762	41.9853	1.73539e-20	-1.36921	down
AT3G16140.1	3270	3475	3210	779	896	787	787.827	780.47	798.785	207.235	219.747	202.715	0	-2.28926	down
AT3G16240.1	11153	10952	11816	3089	2891	2344	2687.04	2459.77	2940.33	821.757	709.026	603.765	2.41557e-128	-2.29912	down
AT3G16250.1	127	134	105	20	31	31	30.5975	30.0958	26.1285	5.32054	7.60284	7.98494	1.74956e-16	-2.39113	down
AT3G16330.1	24	16	19	69	74	77	5.78221	3.59353	4.72801	18.3559	18.1487	19.8336	2.70146e-05	1.57784	up
AT3G16410.1	5	2	6	67	66	58	1.20463	0.449191	1.49306	17.8238	16.1867	14.9396	1.24581e-10	3.38513	up
AT3G16440.1	41	33	24	184	202	156	9.87795	7.41166	5.97222	48.9489	49.5411	40.1823	3.05382e-15	2.15843	up
AT3G16520.3	337	365	298	169	152	146	81.1919	81.9774	74.1551	44.9585	37.2785	37.6065	1.69088e-18	-1.36275	down
AT3G16560.1	78	86	60	36	32	27	18.7922	19.3152	14.9306	9.57697	7.8481	6.95463	1.02797e-05	-1.47558	down
AT3G16670.1	901	934	933	157	231	133	217.074	209.772	232.17	41.7662	56.6534	34.258	1.6635e-66	-2.67768	down
AT3G17040.1	79	110	96	39	67	50	19.0331	24.7055	23.8889	10.375	16.432	12.8789	0.00025863	-1.12733	down
AT3G17120.1	19	29	21	69	76	55	4.57759	6.51327	5.2257	18.3559	18.6392	14.1668	0.00157992	1.23131	up
AT3G17170.1	271	296	255	137	138	123	65.2908	66.4803	63.4549	36.4457	33.8449	31.6822	1.75517e-16	-1.31265	down
AT3G17210.1	1731	1753	1758	823	903	830	417.042	393.716	437.465	218.94	221.463	213.79	1.22781e-74	-1.31124	down
AT3G17420.1	20	15	18	152	158	207	4.81851	3.36893	4.47917	40.4361	38.75	53.3188	6.65765e-21	2.94891	up
AT3G17470.1	87	109	83	54	60	50	20.9605	24.4809	20.6539	14.3655	14.7152	12.8789	0.000221572	-1.02394	down
AT3G17510.1	174	216	196	35	45	28	41.921	48.5127	48.7732	9.31094	11.0364	7.21221	8.04895e-29	-2.68254	down
AT3G17520.1	87	53	94	22	10	10	20.9605	11.9036	23.3912	5.85259	2.45253	2.57579	7.88292e-09	-2.64222	down
AT3G17810.1	206	231	194	521	619	597	49.6307	51.8816	48.2755	138.6	151.812	153.775	4.51854e-21	1.18298	up
AT3G17820.1	170	162	163	682	837	740	40.9573	36.3845	40.5614	181.43	205.277	190.608	3.73224e-52	1.90598	up
AT3G18000.1	72	51	46	243	272	237	17.3466	11.4544	11.4468	64.6445	66.7088	61.0462	3.16423e-16	1.85607	up
AT3G18050.1	418	412	427	89	91	98	100.707	92.5334	106.256	23.6764	22.318	25.2427	9.44796e-56	-2.44033	down
AT3G18080.1	1267	1430	1157	341	330	334	305.253	321.172	287.911	90.7152	80.9335	86.0313	1.03809e-119	-2.20577	down
AT3G18200.2	11	0	9	44	47	34	2.65018	0	2.23958	11.7052	11.5269	8.75768	0.00322828	2.11837	up
AT3G18250.1	374	418	371	1129	1381	1521	90.1062	93.881	92.3206	300.344	338.694	391.777	2.44067e-37	1.51469	up
AT3G18280.1	91	103	101	748	902	890	21.9242	23.1334	25.1331	198.988	221.218	229.245	3.33123e-92	2.81886	up
AT3G18370.1	78	82	92	197	224	222	18.7922	18.4168	22.8935	52.4073	54.9367	57.1825	1.5406e-07	1.06618	up
AT3G18390.1	200	209	182	87	101	87	48.1851	46.9405	45.2894	23.1443	24.7706	22.4094	3.55482e-13	-1.36901	down
AT3G18400.1	2	0	1	22	15	15	0.481851	0	0.248843	5.85259	3.6788	3.86368	0.000760685	3.09631	up
AT3G18450.1	2	0	0	15	24	26	0.481851	0	0	3.9904	5.88607	6.69705	5.53645e-05	3.70881	up
AT3G18520.1	0	0	0	9	15	14	0	0	0	2.39424	3.6788	3.6061	0.00031159	4.00878	up
AT3G18680.1	301	291	277	104	109	113	72.5186	65.3573	68.9294	27.6668	26.7326	29.1064	9.5413e-25	-1.68038	down
AT3G18773.1	84	135	94	14	18	12	20.2377	30.3204	23.3912	3.72438	4.41455	3.09095	1.97082e-17	-3.01806	down
AT3G18830.1	323	344	343	1265	1416	1302	77.8189	77.2609	85.353	336.524	347.278	335.368	2.43927e-82	1.70094	up
AT3G18880.1	8	9	6	29	41	26	1.9274	2.02136	1.49306	7.71478	10.0554	6.69705	0.00406874	1.67833	up
AT3G18890.1	142	171	130	45	33	37	34.2114	38.4059	32.3496	11.9712	8.09335	9.53042	3.15993e-17	-2.18269	down
AT3G18950.1	17	20	15	49	76	66	4.09573	4.49191	3.73264	13.0353	18.6392	17.0002	0.000145694	1.55208	up
AT3G19030.1	2322	2619	2394	203	228	233	559.429	588.216	595.729	54.0035	55.9177	60.0159	0	-3.73366	down
AT3G19150.1	27	20	25	60	57	87	6.50499	4.49191	6.22107	15.9616	13.9794	22.4094	0.00405657	1.19122	up
AT3G19260.1	52	62	56	145	144	137	12.5281	13.9249	13.9352	38.5739	35.3164	35.2883	1.67467e-05	1.04164	up
AT3G19370.1	25	19	16	85	93	83	6.02314	4.26732	3.98148	22.6123	22.8085	21.379	2.90478e-07	1.80114	up
AT3G19430.1	6	2	6	72	96	62	1.44555	0.449191	1.49306	19.1539	23.5443	15.9699	4.39473e-12	3.5413	up
AT3G19450.1	223	306	251	1144	1204	1235	53.7264	68.7263	62.4595	304.335	295.285	318.11	3.31037e-69	1.92419	up
AT3G19480.1	43	53	30	5	10	15	10.3598	11.9036	7.46528	1.33013	2.45253	3.86368	2.72934e-05	-2.21431	down
AT3G19515.2	47	40	45	17	20	20	11.3235	8.98383	11.1979	4.52246	4.90506	5.15158	0.000603365	-1.44415	down
AT3G19550.1	35	28	21	64	94	75	8.43239	6.28868	5.2257	17.0257	23.0538	19.3184	0.00199244	1.16351	up
AT3G19660.1	123	183	155	657	706	795	29.6338	41.101	38.5706	174.78	173.149	204.775	1.67616e-37	1.94757	up
AT3G19710.1	106	90	125	935	1061	1016	25.5381	20.2136	31.1053	248.735	260.213	261.7	2.13912e-95	2.93792	up
AT3G19790.1	32	33	26	77	101	81	7.70962	7.41166	6.46991	20.4841	24.7706	20.8639	0.000242056	1.20893	up
AT3G19800.2	146	120	87	27	37	25	35.1751	26.9515	21.6493	7.18273	9.07436	6.43947	4.95336e-12	-2.2191	down
AT3G19820.3	100	88	108	36	25	14	24.0926	19.7644	26.875	9.57697	6.13133	3.6061	2.95531e-09	-2.19679	down
AT3G19850.1	179	190	162	51	34	29	43.1257	42.6732	40.3125	13.5674	8.3386	7.46979	8.72919e-21	-2.4539	down
AT3G19860.1	281	277	278	129	183	128	67.7001	62.213	69.1783	34.3175	44.8813	32.9701	2.95998e-11	-1.19913	down
AT3G19970.1	7	4	7	26	39	33	1.68648	0.898383	1.7419	6.9167	9.56487	8.5001	0.000795407	2.01512	up
AT3G20080.2	4	15	10	51	34	33	0.963702	3.36893	2.48843	13.5674	8.3386	8.5001	0.00547776	1.65956	up
AT3G20100.1	64	77	66	258	266	234	15.4192	17.2939	16.4236	68.6349	65.2373	60.2734	2.05706e-16	1.58778	up
AT3G20110.1	0	1	0	23	22	21	0	0.224596	0	6.11862	5.39557	5.40915	9.75373e-06	4.2064	up
AT3G20210.1	15	16	14	0	3	5	3.61388	3.59353	3.4838	0	0.735759	1.28789	0.00554763	-2.37854	down
AT3G20230.1	238	268	215	103	114	99	57.3403	60.1916	53.5012	27.4008	27.9588	25.5003	9.42054e-17	-1.45385	down
AT3G20340.1	246	281	212	52	48	82	59.2677	63.1114	52.7547	13.8334	11.7721	21.1215	6.35952e-21	-2.26142	down
AT3G20380.1	2	9	9	101	98	123	0.481851	2.02136	2.23958	26.8687	24.0348	31.6822	7.0783e-16	3.58405	up
AT3G20460.1	0	1	1	18	16	17	0	0.224596	0.248843	4.78848	3.92405	4.37884	0.000276004	3.43009	up
AT3G20660.1	66	59	50	35	35	33	15.9011	13.2511	12.4421	9.31094	8.58386	8.5001	0.00453788	-1.017	down
AT3G20680.1	57	81	66	23	24	22	13.7328	18.1922	16.4236	6.11862	5.88607	5.66673	3.02849e-07	-1.7911	down
AT3G20820.1	709	718	752	255	224	213	170.816	161.26	187.13	67.8368	54.9367	54.8643	3.10908e-53	-1.9232	down
AT3G20865.1	23	16	23	9	6	3	5.54129	3.59353	5.72338	2.39424	1.47152	0.772736	0.00620641	-1.89037	down
AT3G20940.1	28	28	34	98	114	128	6.74592	6.28868	8.46065	26.0706	27.9588	32.9701	1.36094e-07	1.61109	up
AT3G20960.1	15	15	21	46	63	57	3.61388	3.36893	5.2257	12.2372	15.4509	14.682	0.00149417	1.37465	up
AT3G21055.1	8896	8937	7630	1106	1263	1142	2143.27	2007.21	1898.67	294.226	309.755	294.155	0	-3.13051	down
AT3G21080.1	28	35	29	124	142	138	6.74592	7.86085	7.21644	32.9873	34.8259	35.5459	1.75179e-11	1.83416	up
AT3G21180.1	1	3	2	19	16	14	0.240926	0.673787	0.497685	5.05451	3.92405	3.6061	0.00543503	2.37306	up
AT3G21190.1	50	46	49	138	136	140	12.0463	10.3314	12.1933	36.7117	33.3544	36.061	1.23815e-06	1.22368	up
AT3G21230.1	23	15	20	119	131	145	5.54129	3.36893	4.97685	31.6572	32.1281	37.3489	2.02398e-14	2.43784	up
AT3G21240.1	46	48	47	446	482	496	11.0826	10.7806	11.6956	118.648	118.212	127.759	7.50676e-65	3.04109	up
AT3G21250.2	72	66	58	41	37	31	17.3466	14.8233	14.4329	10.9071	9.07436	7.98494	0.00138306	-1.09789	down
AT3G21260.1	37	32	51	7	12	9	8.91424	7.18706	12.691	1.86219	2.94304	2.31821	9.31659e-06	-2.26748	down
AT3G21260.2	8	7	19	1	3	1	1.9274	1.57217	4.72801	0.266027	0.735759	0.257579	0.00966508	-2.49366	down
AT3G21260.3	44	49	31	13	19	12	10.6007	11.0052	7.71412	3.45835	4.65981	3.09095	0.000264271	-1.69913	down
AT3G21420.1	31	51	40	116	133	142	7.46869	11.4544	9.95371	30.8591	32.6186	36.5762	9.9077e-07	1.3892	up
AT3G21500.2	0	0	0	13	7	8	0	0	0	3.45835	1.71677	2.06063	0.00203603	3.59375	up
AT3G21510.1	36	31	23	114	111	150	8.67332	6.96247	5.72338	30.3271	27.2231	38.6368	3.30166e-08	1.75324	up
AT3G21560.1	17	16	9	61	85	73	4.09573	3.59353	2.23958	16.2276	20.8465	18.8033	6.03663e-07	2.03934	up
AT3G21670.1	21	39	22	3	4	4	5.05944	8.75923	5.47454	0.798081	0.981012	1.03032	9.70696e-06	-2.88687	down
AT3G21700.3	15	10	9	40	45	38	3.61388	2.24596	2.23958	10.6411	11.0364	9.78799	0.0028503	1.5071	up
AT3G21710.1	19	17	12	47	45	53	4.57759	3.81813	2.98611	12.5033	11.0364	13.6517	0.00507709	1.27779	up
AT3G21710.2	33	29	32	173	177	164	7.95054	6.51327	7.96297	46.0226	43.4098	42.2429	3.00106e-17	2.14643	up
AT3G21760.1	51	69	42	18	14	13	12.2872	15.4971	10.4514	4.78848	3.43354	3.34852	1.44228e-06	-2.03939	down
AT3G21770.1	83	123	84	463	568	560	19.9968	27.6253	20.9028	123.17	139.304	144.244	1.90883e-37	2.17223	up
AT3G21870.1	60	73	46	6	0	1	14.4555	16.3955	11.4468	1.59616	0	0.257579	5.0578e-13	-4.49186	down
AT3G22120.1	10289	10739	9574	5647	5678	4831	2478.88	2411.93	2382.42	1502.25	1392.55	1244.36	1.45827e-76	-1.19436	down
AT3G22142.1	17	49	31	13	6	7	4.09573	11.0052	7.71412	3.45835	1.47152	1.80305	0.00147579	-1.9958	down
AT3G22150.1	15	37	25	7	7	6	3.61388	8.31004	6.22107	1.86219	1.71677	1.54547	0.00124812	-2.04467	down
AT3G22210.1	262	313	279	92	103	99	63.1225	70.2984	69.4271	24.4745	25.2611	25.5003	1.56855e-27	-1.8014	down
AT3G22235.1	20	18	26	166	170	177	4.81851	4.04272	6.46991	44.1605	41.693	45.5914	4.42059e-21	2.68032	up
AT3G22240.1	86	89	76	266	366	359	20.7196	19.989	18.912	70.7631	89.7626	92.4708	2.83061e-18	1.69167	up
AT3G22260.2	54	32	57	99	127	134	13.01	7.18706	14.184	26.3367	31.1471	34.5156	0.00273625	1.02431	up
AT3G22425.2	34	30	27	95	110	98	8.19147	6.73787	6.71875	25.2726	26.9778	25.2427	2.39497e-06	1.43364	up
AT3G22550.1	29	24	23	144	141	175	6.98684	5.3903	5.72338	38.3079	34.5807	45.0763	3.23972e-15	2.28457	up
AT3G22570.1	25	33	26	134	165	209	6.02314	7.41166	6.46991	35.6476	40.4667	53.834	1.2339e-14	2.28391	up
AT3G22600.1	163	254	209	661	706	796	39.2709	57.0473	52.0081	175.844	173.149	205.033	2.12863e-22	1.51275	up
AT3G22620.1	100	108	91	382	466	477	24.0926	24.2563	22.6447	101.622	114.288	122.865	3.10897e-30	1.863	up
AT3G22640.1	15	5	16	0	0	0	3.61388	1.12298	3.98148	0	0	0	8.75198e-05	-4.2888	down
AT3G22740.1	2	2	3	25	29	29	0.481851	0.449191	0.746528	6.65067	7.11234	7.46979	3.409e-05	2.94392	up
AT3G22800.1	11	5	7	77	78	95	2.65018	1.12298	1.7419	20.4841	19.1297	24.47	7.39964e-12	3.03608	up
AT3G22840.1	1	1	0	23	25	32	0.240926	0.224596	0	6.11862	6.13133	8.24252	2.94275e-06	4.05456	up
AT3G22930.1	22	28	33	139	195	159	5.30036	6.28868	8.21181	36.9777	47.8243	40.955	2.58548e-15	2.25294	up
AT3G22960.1	532	530	489	287	305	259	128.172	119.036	121.684	76.3497	74.8022	66.7129	1.24921e-21	-1.13809	down
AT3G23000.1	537	576	581	1730	1636	1550	129.377	129.367	144.578	460.226	401.234	399.247	1.33569e-43	1.26114	up
AT3G23030.1	371	343	442	222	237	212	89.3834	77.0363	109.988	59.058	58.125	54.6067	2.14295e-10	-1.05968	down
AT3G23070.1	47	35	39	14	19	22	11.3235	7.86085	9.70487	3.72438	4.65981	5.66673	0.00294382	-1.36714	down
AT3G23080.1	109	86	117	34	35	21	26.2609	19.3152	29.1146	9.04491	8.58386	5.40915	6.41213e-10	-2.03293	down
AT3G23090.2	27	34	36	194	219	242	6.50499	7.63625	8.95834	51.6092	53.7104	62.3341	4.44218e-23	2.44978	up
AT3G23120.1	0	2	0	12	8	14	0	0.449191	0	3.19232	1.96202	3.6061	0.00855562	2.81441	up
AT3G23150.1	35	36	38	114	129	111	8.43239	8.08544	9.45602	30.3271	31.6376	28.5912	4.08089e-07	1.40198	up
AT3G23170.1	142	135	144	500	599	709	34.2114	30.3204	35.8333	133.013	146.907	182.623	4.64865e-27	1.81504	up
AT3G23175.1	11	14	18	249	272	248	2.65018	3.14434	4.47917	66.2407	66.7088	63.8795	3.20546e-41	3.8178	up
AT3G23180.1	21	30	23	111	125	126	5.05944	6.73787	5.72338	29.529	30.6566	32.4549	3.14114e-11	1.98336	up
AT3G23190.1	6	7	5	105	134	141	1.44555	1.57217	1.24421	27.9328	32.8639	36.3186	3.71231e-21	3.96786	up
AT3G23200.1	8	18	11	50	62	66	1.9274	4.04272	2.73727	13.3013	15.2057	17.0002	2.14609e-05	1.92265	up
AT3G23400.1	366	396	290	175	207	227	88.1787	88.9399	72.1644	46.5547	50.7674	58.4704	3.75306e-10	-1.05425	down
AT3G23430.1	71	72	84	219	273	226	17.1057	16.1709	20.9028	58.2599	66.9541	58.2128	2.09259e-11	1.37036	up
AT3G23470.1	6	3	3	27	30	26	1.44555	0.673787	0.746528	7.18273	7.35759	6.69705	0.000528155	2.29992	up
AT3G23570.1	136	177	118	317	375	393	32.7659	39.7534	29.3634	84.3305	91.9699	101.228	4.46693e-09	1.0559	up
AT3G23600.2	390	417	204	1165	1500	1431	93.961	93.6564	50.7639	309.921	367.88	368.595	3.20534e-08	1.71779	up
AT3G23700.1	369	380	280	60	74	54	88.9015	85.3463	69.676	15.9616	18.1487	13.9093	4.35722e-43	-2.70419	down
AT3G23760.1	138	141	151	29	34	25	33.2477	31.668	37.5752	7.71478	8.3386	6.43947	1.07912e-21	-2.53	down
AT3G23790.1	10	0	13	67	69	62	2.40926	0	3.23496	17.8238	16.9225	15.9699	3.06398e-05	2.59141	up
AT3G23800.1	11	7	14	34	48	42	2.65018	1.57217	3.4838	9.04491	11.7721	10.8183	0.00253913	1.58659	up
AT3G23810.1	201	216	210	1038	1099	1049	48.426	48.5127	52.257	276.136	269.533	270.2	6.14136e-93	2.06626	up
AT3G23830.2	23	9	21	58	80	159	5.54129	2.02136	5.2257	15.4296	19.6202	40.955	4.59526e-05	2.09019	up
AT3G23880.1	151	139	190	69	60	48	36.3798	31.2188	47.2801	18.3559	14.7152	12.3638	1.78615e-10	-1.69524	down
AT3G23920.1	178	210	162	530	587	615	42.8847	47.1651	40.3125	140.994	143.964	158.411	1.17041e-24	1.37827	up
AT3G24020.1	26	40	23	157	185	179	6.26406	8.98383	5.72338	41.7662	45.3718	46.1066	1.22391e-16	2.24615	up
AT3G24210.1	2	1	1	14	16	15	0.481851	0.224596	0.248843	3.72438	3.92405	3.86368	0.00313683	2.66635	up
AT3G24240.1	5	5	2	17	27	26	1.20463	1.12298	0.497685	4.52246	6.62183	6.69705	0.00415878	2.05709	up
AT3G24300.1	10	28	13	117	130	151	2.40926	6.28868	3.23496	31.1251	31.8829	38.8944	8.55941e-13	2.62922	up
AT3G24430.1	36	46	39	12	10	12	8.67332	10.3314	9.70487	3.19232	2.45253	3.09095	1.31011e-05	-2.01558	down
AT3G24890.1	0	0	0	32	34	32	0	0	0	8.51286	8.3386	8.24252	5.59009e-08	5.29829	up
AT3G24890.2	8	10	7	0	0	0	1.9274	2.24596	1.7419	0	0	0	0.000652539	-3.87299	down
AT3G25110.1	9	8	10	65	56	52	2.16833	1.79677	2.48843	17.2917	13.7342	13.3941	4.91731e-07	2.30628	up
AT3G25130.1	2	1	0	18	29	23	0.481851	0.224596	0	4.78848	7.11234	5.92431	3.87667e-05	3.52294	up
AT3G25210.1	63	54	62	37	32	29	15.1783	12.1282	15.4282	9.84299	7.8481	7.46979	0.00192234	-1.12062	down
AT3G25400.1	32	26	26	98	94	80	7.70962	5.83949	6.46991	26.0706	23.0538	20.6063	2.46446e-05	1.39093	up
AT3G25610.1	11	20	19	47	52	59	2.65018	4.49191	4.72801	12.5033	12.7532	15.1971	0.00282762	1.34128	up
AT3G25660.1	340	393	291	179	218	185	81.9147	88.2661	72.4132	47.6188	53.4652	47.6521	2.72026e-12	-1.08259	down
AT3G25690.1	693	744	582	85	65	74	166.961	167.099	144.826	22.6123	15.9414	19.0608	6.07868e-102	-3.42262	down
AT3G25730.1	10	16	15	91	91	88	2.40926	3.59353	3.73264	24.2084	22.318	22.6669	9.9255e-11	2.3813	up
AT3G25760.1	110	115	92	43	48	51	26.5018	25.8285	22.8935	11.4392	11.7721	13.1365	1.11181e-07	-1.41205	down
AT3G25770.1	365	411	298	26	31	31	87.9378	92.3088	74.1551	6.9167	7.60284	7.98494	8.70027e-68	-3.83981	down
AT3G25780.1	14	13	14	47	34	64	3.37296	2.91974	3.4838	12.5033	8.3386	16.485	0.00305265	1.486	up
AT3G25805.1	155	145	119	66	60	59	37.3435	32.5664	29.6123	17.5578	14.7152	15.1971	2.50816e-09	-1.43572	down
AT3G25820.1	89	149	105	48	59	54	21.4424	33.4648	26.1285	12.7693	14.4699	13.9093	2.73512e-06	-1.33827	down
AT3G25870.1	23	31	23	64	80	74	5.54129	6.96247	5.72338	17.0257	19.6202	19.0608	0.000786344	1.20156	up
AT3G25882.1	14	15	9	64	79	122	3.37296	3.36893	2.23958	17.0257	19.375	31.4246	1.96136e-08	2.4382	up
AT3G25900.1	47	41	53	122	136	124	11.3235	9.20842	13.1887	32.4553	33.3544	31.9398	2.35892e-05	1.14295	up
AT3G25920.1	2354	2535	2113	691	774	683	567.139	569.35	525.805	183.825	189.826	175.926	2.88231e-162	-1.97619	down
AT3G25930.1	22	24	31	128	220	157	5.30036	5.3903	7.71412	34.0514	53.9557	40.4399	2.90928e-14	2.37986	up
AT3G26060.1	60	24	53	0	4	3	14.4555	5.3903	13.1887	0	0.981012	0.772736	2.84936e-09	-4.09636	down
AT3G26060.2	913	1000	766	280	340	312	219.965	224.596	190.614	74.4875	83.386	80.3646	1.3484e-55	-1.79134	down
AT3G26170.1	32	38	52	160	161	182	7.70962	8.53463	12.9398	42.5643	39.4857	46.8793	1.63458e-10	1.74183	up
AT3G26200.1	21	27	19	50	81	53	5.05944	6.06408	4.72801	13.3013	19.8655	13.6517	0.00648629	1.14555	up
AT3G26240.1	45	59	46	26	26	32	10.8416	13.2511	11.4468	6.9167	6.37658	8.24252	0.00589786	-1.0773	down
AT3G26280.1	146	152	152	81	93	83	35.1751	34.1385	37.8241	21.5482	22.8085	21.379	2.95265e-07	-1.07565	down
AT3G26330.1	4	8	3	24	27	22	0.963702	1.79677	0.746528	6.38464	6.62183	5.66673	0.0068032	1.85194	up
AT3G26440.2	14	15	16	86	70	77	3.37296	3.36893	3.98148	22.8783	17.1677	19.8336	8.70122e-08	2.04163	up
AT3G26510.1	835	915	1060	306	268	253	201.173	205.505	263.773	81.4042	65.7278	65.1674	2.34975e-48	-2.03179	down
AT3G26510.5	750	827	714	288	345	225	180.694	185.741	177.674	76.6157	84.6123	57.9552	1.09446e-34	-1.68658	down
AT3G26520.1	11179	11382	11130	4797	4777	4159	2693.31	2556.35	2769.62	1276.13	1171.57	1071.27	9.97382e-139	-1.56874	down
AT3G26590.1	6	3	3	34	33	37	1.44555	0.673787	0.746528	9.04491	8.09335	9.53042	2.35138e-05	2.62209	up
AT3G26650.1	7996	8917	7098	1906	2097	1844	1926.44	2002.72	1766.29	507.047	514.296	474.975	9.8332e-290	-2.3083	down
AT3G26700.1	8	7	6	26	26	31	1.9274	1.57217	1.49306	6.9167	6.37658	7.98494	0.00857503	1.60151	up
AT3G26710.1	370	446	337	93	118	107	89.1424	100.17	83.86	24.7405	28.9399	27.5609	3.58199e-39	-2.11868	down
AT3G26740.1	4324	4359	4143	1598	1790	1577	1041.76	979.012	1030.96	425.111	439.003	406.202	3.21378e-188	-1.6444	down
AT3G26744.1	75	58	60	33	39	38	18.0694	13.0265	14.9306	8.77889	9.56487	9.78799	0.00217549	-1.06804	down
AT3G26770.1	35	23	24	94	102	104	8.43239	5.1657	5.97222	25.0065	25.0158	26.7882	1.96135e-06	1.56077	up
AT3G26790.1	0	0	0	11	19	16	0	0	0	2.9263	4.65981	4.12126	8.04608e-05	4.26395	up
AT3G26830.1	9	15	7	95	111	126	2.16833	3.36893	1.7419	25.2726	27.2231	32.4549	3.10858e-15	3.05498	up
AT3G26840.1	3	3	5	36	40	60	0.722777	0.673787	1.24421	9.57697	9.81012	15.4547	3.15828e-07	3.09643	up
AT3G26900.1	140	154	144	27	55	38	33.7296	34.5877	35.8333	7.18273	13.4889	9.78799	1.36376e-14	-2.11643	down
AT3G26900.2	42	58	41	17	16	5	10.1189	13.0265	10.2026	4.52246	3.92405	1.28789	4.43472e-05	-2.05818	down
AT3G27050.1	169	178	155	92	94	88	40.7164	39.978	38.5706	24.4745	23.0538	22.6669	1.00046e-08	-1.13827	down
AT3G27150.1	4	4	1	41	45	37	0.963702	0.898383	0.248843	10.9071	11.0364	9.53042	3.08952e-07	3.21056	up
AT3G27160.1	1678	1851	1553	492	475	462	404.273	415.727	386.453	130.885	116.495	119.001	1.73042e-144	-2.09905	down
AT3G27170.1	13	22	21	65	52	59	3.13203	4.9411	5.2257	17.2917	12.7532	15.1971	0.00165278	1.34115	up
AT3G27180.1	19	18	32	6	11	4	4.57759	4.04272	7.96297	1.59616	2.69778	1.03032	0.0061898	-1.84888	down
AT3G27190.1	74	67	64	184	159	173	17.8285	15.0479	15.9259	48.9489	38.9952	44.5611	6.86665e-06	1.04855	up
AT3G27270.1	20	20	10	65	60	62	4.81851	4.49191	2.48843	17.2917	14.7152	15.9699	0.000186723	1.58236	up
AT3G27560.1	62	65	43	164	152	118	14.9374	14.5987	10.7002	43.6284	37.2785	30.3943	0.000160727	1.06674	up
AT3G27690.1	343	354	319	33	52	42	82.6375	79.5069	79.3808	8.77889	12.7532	10.8183	4.32388e-61	-3.24998	down
AT3G27770.1	711	840	693	398	476	401	171.298	188.66	172.448	105.879	116.74	103.289	1.28832e-25	-1.08681	down
AT3G27830.1	4195	4101	3857	1526	1603	1417	1010.68	921.067	959.786	405.957	393.141	364.989	4.36995e-153	-1.69291	down
AT3G27850.1	1791	1951	1696	472	525	441	431.498	438.186	422.037	125.565	128.758	113.592	7.51416e-173	-2.19035	down
AT3G27890.1	46	64	61	168	194	196	11.0826	14.3741	15.1794	44.6925	47.5791	50.4854	8.31313e-10	1.41796	up
AT3G27950.1	1	0	0	9	13	7	0.240926	0	0	2.39424	3.18829	1.80305	0.00704237	3.02075	up
AT3G28070.1	7	0	6	53	48	64	1.68648	0	1.49306	14.0994	11.7721	16.485	2.85379e-07	3.11846	up
AT3G28080.1	6	6	5	33	35	28	1.44555	1.34757	1.24421	8.77889	8.58386	7.21221	0.000424562	2.07898	up
AT3G28100.1	32	29	39	94	82	88	7.70962	6.51327	9.70487	25.0065	20.1107	22.6669	0.00100312	1.10265	up
AT3G28220.1	37	49	13	1	0	0	8.91424	11.0052	3.23496	0.266027	0	0	1.76765e-08	-5.07937	down
AT3G28270.2	10	6	8	0	0	0	2.40926	1.34757	1.99074	0	0	0	0.000858571	-3.81299	down
AT3G28460.1	62	85	57	29	33	28	14.9374	19.0906	14.184	7.71478	8.09335	7.21221	3.72828e-05	-1.41815	down
AT3G28480.1	73	104	83	192	229	257	17.5876	23.3579	20.6539	51.0772	56.1629	66.1978	5.78924e-07	1.10202	up
AT3G28510.1	0	0	0	10	12	16	0	0	0	2.66027	2.94304	4.12126	0.000302525	4.01471	up
AT3G28540.1	13	28	16	172	182	227	3.13203	6.28868	3.98148	45.7566	44.636	58.4704	4.07561e-22	3.02192	up
AT3G28550.1	18	18	12	208	206	198	4.33666	4.04272	2.98611	55.3336	50.5221	51.0006	4.49076e-31	3.3408	up
AT3G28570.1	0	0	0	17	17	19	0	0	0	4.52246	4.1693	4.894	2.21369e-05	4.47961	up
AT3G28580.1	1	1	0	14	22	30	0.240926	0.224596	0	3.72438	5.39557	7.72736	4.05152e-05	3.74973	up
AT3G28740.1	141	191	100	8	12	12	33.9705	42.8978	24.8843	2.12821	2.94304	3.09095	1.73831e-25	-3.90006	down
AT3G28940.1	890	1086	920	2483	2701	2774	214.424	243.911	228.935	660.545	662.428	714.524	2.40193e-57	1.18518	up
AT3G29030.1	19	13	11	47	68	50	4.57759	2.91974	2.73727	12.5033	16.6772	12.8789	0.000443052	1.59683	up
AT3G29034.1	41	38	50	82	132	122	9.87795	8.53463	12.4421	21.8142	32.3734	31.4246	0.000994012	1.07672	up
AT3G29185.1	148	123	104	47	56	53	35.657	27.6253	25.8796	12.5033	13.7342	13.6517	1.07074e-08	-1.52116	down
AT3G29240.2	327	403	365	155	126	145	78.7827	90.512	90.8276	41.2342	30.9019	37.3489	1.34261e-23	-1.62263	down
AT3G29320.1	533	610	481	260	256	298	128.413	137.003	119.693	69.167	62.7848	76.7585	5.60843e-22	-1.26179	down
AT3G29370.1	95	99	150	63	52	55	22.8879	22.235	37.3264	16.7597	12.7532	14.1668	4.96342e-05	-1.27246	down
AT3G29410.1	2	4	2	105	112	130	0.481851	0.898383	0.497685	27.9328	27.4683	33.4852	5.90897e-20	4.83413	up
AT3G29430.1	0	0	0	12	21	20	0	0	0	3.19232	5.15031	5.15158	2.76842e-05	4.44858	up
AT3G29630.1	0	0	0	4	12	18	0	0	0	1.06411	2.94304	4.63642	0.00114646	3.74361	up
AT3G29970.1	0	0	4	25	34	53	0	0	0.995371	6.65067	8.3386	13.6517	1.86777e-06	3.82903	up
AT3G30775.1	640	728	540	302	343	360	154.192	163.506	134.375	80.3401	84.1218	92.7284	9.41924e-21	-1.19175	down
AT3G32040.1	0	0	0	45	42	43	0	0	0	11.9712	10.3006	11.0759	1.99464e-09	5.66788	up
AT3G42180.1	0	0	0	15	10	15	0	0	0	3.9904	2.45253	3.86368	0.000209662	4.08679	up
AT3G43110.1	3	1	1	14	14	22	0.722777	0.224596	0.248843	3.72438	3.43354	5.66673	0.00361371	2.56539	up
AT3G43190.1	0	3	0	9	26	48	0	0.673787	0	2.39424	6.37658	12.3638	0.000136328	3.57487	up
AT3G43540.1	55	67	65	38	29	27	13.2509	15.0479	16.1748	10.109	7.11234	6.95463	0.000588009	-1.23451	down
AT3G43800.1	114	162	122	395	440	368	27.4655	36.3845	30.3588	105.081	107.911	94.789	9.31753e-16	1.31758	up
AT3G43960.1	20	12	29	51	77	59	4.81851	2.69515	7.21644	13.5674	18.8845	15.1971	0.00684804	1.27391	up
AT3G44020.1	37	73	46	11	14	15	8.91424	16.3955	11.4468	2.9263	3.43354	3.86368	2.63601e-06	-2.13848	down
AT3G44300.1	56	78	47	476	462	457	13.4918	17.5185	11.6956	126.629	113.307	117.714	1.26123e-47	2.6594	up
AT3G44320.1	73	86	62	247	263	247	17.5876	19.3152	15.4282	65.7086	64.5015	63.622	1.02765e-14	1.49367	up
AT3G44400.2	17	17	18	58	53	58	4.09573	3.81813	4.47917	15.4296	12.9984	14.9396	0.000741052	1.38488	up
AT3G44450.1	24	20	11	64	102	96	5.78221	4.49191	2.73727	17.0257	25.0158	24.7276	2.03216e-06	1.91409	up
AT3G44540.1	3	1	3	18	45	38	0.722777	0.224596	0.746528	4.78848	11.0364	9.78799	1.58369e-05	3.15291	up
AT3G44550.1	4	3	4	77	89	101	0.963702	0.673787	0.995371	20.4841	21.8275	26.0155	8.32144e-16	4.07998	up
AT3G44610.1	11	14	14	48	34	39	2.65018	3.14434	3.4838	12.7693	8.3386	10.0456	0.00996359	1.30728	up
AT3G44720.1	193	187	157	597	605	716	46.4986	41.9994	39.0683	158.818	148.378	184.426	1.93974e-26	1.55758	up
AT3G44890.1	586	639	553	230	294	244	141.182	143.517	137.61	61.1862	72.1044	62.8492	4.27477e-36	-1.48239	down
AT3G44990.1	415	366	396	2502	2782	2540	99.9841	82.202	98.5417	665.599	682.294	654.25	4.97812e-181	2.4511	up
AT3G45050.3	112	102	100	58	52	61	26.9837	22.9088	24.8843	15.4296	12.7532	15.7123	1.88345e-05	-1.13604	down
AT3G45070.1	10	12	10	230	265	254	2.40926	2.69515	2.48843	61.1862	64.992	65.425	7.81868e-42	4.18624	up
AT3G45080.1	0	1	1	30	44	50	0	0.224596	0.248843	7.98081	10.7911	12.8789	1.05981e-08	4.6511	up
AT3G45140.1	56	80	36	155	160	149	13.4918	17.9677	8.95834	41.2342	39.2405	38.3792	0.000103537	1.15017	up
AT3G45160.1	42	62	71	291	313	319	10.1189	13.9249	17.6678	77.4138	76.7642	82.1676	1.04541e-22	2.10456	up
AT3G45300.1	409	460	400	87	112	104	98.5385	103.314	99.5371	23.1443	27.4683	26.7882	1.35758e-54	-2.32976	down
AT3G45650.1	6	5	5	80	112	96	1.44555	1.12298	1.24421	21.2821	27.4683	24.7276	2.94771e-16	3.71795	up
AT3G45660.1	0	0	3	56	63	60	0	0	0.746528	14.8975	15.4509	15.4547	1.7253e-11	4.8578	up
AT3G45710.1	16	22	19	100	97	75	3.85481	4.9411	4.72801	26.6027	23.7895	19.3184	4.56176e-08	1.93452	up
AT3G45780.2	481	552	550	254	234	249	115.885	123.977	136.863	67.5708	57.3892	64.1371	9.61628e-27	-1.37113	down
AT3G46100.1	97	140	122	54	67	66	23.3698	31.4434	30.3588	14.3655	16.432	17.0002	4.09213e-06	-1.19792	down
AT3G46230.1	5	1	4	22	16	22	1.20463	0.224596	0.995371	5.85259	3.92405	5.66673	0.00998097	2.04053	up
AT3G46270.1	1	1	0	19	15	8	0.240926	0.224596	0	5.05451	3.6788	2.06063	0.00196632	3.11537	up
AT3G46330.1	0	1	0	20	18	17	0	0.224596	0	5.32054	4.41455	4.37884	5.71942e-05	3.95086	up
AT3G46440.1	103	133	109	267	306	316	24.8153	29.8712	27.1239	71.0292	75.0474	81.3949	6.17787e-10	1.08709	up
AT3G46440.2	31	36	24	101	113	113	7.46869	8.08544	5.97222	26.8687	27.7136	29.1064	2.44854e-07	1.54733	up
AT3G46640.2	276	290	238	152	165	158	66.4954	65.1327	59.2246	40.4361	40.4667	40.6975	9.40388e-11	-1.0274	down
AT3G46670.1	36	35	30	4	11	12	8.67332	7.86085	7.46528	1.06411	2.69778	3.09095	0.000173155	-2.06046	down
AT3G46720.1	2	0	3	36	33	34	0.481851	0	0.746528	9.57697	8.09335	8.75768	9.07199e-07	3.58881	up
AT3G46780.1	1457	1488	1289	260	297	253	351.029	334.198	320.758	69.167	72.8401	65.1674	4.71663e-172	-2.6558	down
AT3G46900.1	64	73	63	290	373	395	15.4192	16.3955	15.6771	77.1478	91.4794	101.744	5.07806e-27	2.11162	up
AT3G47050.2	0	0	0	7	7	14	0	0	0	1.86219	1.71677	3.6061	0.00219512	3.57627	up
AT3G47070.1	2597	2695	2098	437	512	445	625.684	605.285	522.072	116.254	125.57	114.623	9.27433e-175	-2.67479	down
AT3G47090.1	2	1	1	11	19	13	0.481851	0.224596	0.248843	2.9263	4.65981	3.34852	0.00525067	2.58422	up
AT3G47200.2	2	4	4	19	17	25	0.481851	0.898383	0.995371	5.05451	4.1693	6.43947	0.00562202	2.09492	up
AT3G47210.1	8	4	6	30	37	38	1.9274	0.898383	1.49306	7.98081	9.07436	9.78799	0.000280681	2.1181	up
AT3G47220.1	0	3	2	24	12	14	0	0.673787	0.497685	6.38464	2.94304	3.6061	0.00547492	2.54701	up
AT3G47295.1	165	164	148	45	47	46	39.7527	36.8337	36.8287	11.9712	11.5269	11.8486	3.2904e-19	-2.04198	down
AT3G47340.1	1358	1687	1590	17	0	16	327.177	378.893	395.66	4.52246	0	4.12126	7.2001e-09	-5.53911	down
AT3G47340.2	28	51	24	0	7	0	6.74592	11.4544	5.97222	0	1.71677	0	6.30822e-06	-3.58401	down
AT3G47430.1	51	59	32	12	17	10	12.2872	13.2511	7.96297	3.19232	4.1693	2.57579	1.22363e-05	-2.04701	down
AT3G47470.1	16923	17961	16424	2548	2771	2403	4077.18	4033.96	4086.99	677.836	679.596	618.962	0	-3.00582	down
AT3G47540.1	26	30	15	95	112	111	6.26406	6.73787	3.73264	25.2726	27.4683	28.5912	3.19295e-08	1.85239	up
AT3G47560.1	86	119	93	57	56	50	20.7196	26.7269	23.1424	15.1635	13.7342	12.8789	4.30848e-05	-1.12417	down
AT3G47620.1	165	181	189	82	68	85	39.7527	40.6518	47.0313	21.8142	16.6772	21.8942	2.61188e-11	-1.44586	down
AT3G47650.1	895	934	801	237	281	272	215.628	209.772	199.323	63.0484	68.9161	70.0614	6.84576e-81	-2.00485	down
AT3G47780.1	7	4	7	32	28	43	1.68648	0.898383	1.7419	8.51286	6.86708	11.0759	0.000514852	2.08896	up
AT3G47800.1	352	362	306	198	221	184	84.8058	81.3036	76.1459	52.6733	54.2009	47.3945	1.20378e-12	-1.02871	down
AT3G47820.1	10	16	9	41	40	50	2.40926	3.59353	2.23958	10.9071	9.81012	12.8789	0.00157234	1.56884	up
AT3G47860.1	413	467	356	233	254	217	99.5022	104.886	88.588	61.9843	62.2943	55.8946	7.55921e-15	-1.07988	down
AT3G47950.1	2	4	5	22	21	18	0.481851	0.898383	1.24421	5.85259	5.15031	4.63642	0.00795964	1.97827	up
AT3G47980.1	16	15	15	55	54	52	3.85481	3.36893	3.73264	14.6315	13.2437	13.3941	0.000428747	1.48431	up
AT3G48020.1	18	22	17	88	86	112	4.33666	4.9411	4.23033	23.4104	21.0918	28.8488	9.21323e-09	2.00863	up
AT3G48080.1	2	10	10	69	77	69	0.481851	2.24596	2.48843	18.3559	18.8845	17.7729	2.66051e-09	2.87456	up
AT3G48180.1	18	21	19	57	85	81	4.33666	4.71651	4.72801	15.1635	20.8465	20.8639	1.92381e-05	1.62129	up
AT3G48200.1	44	62	53	10	7	14	10.6007	13.9249	13.1887	2.66027	1.71677	3.6061	2.58034e-08	-2.51801	down
AT3G48340.1	34	26	30	412	475	449	8.19147	5.83949	7.46528	109.603	116.495	115.653	7.69182e-67	3.58141	up
AT3G48360.1	534	635	502	0	0	0	128.654	142.618	124.919	0	0	0	6.49692e-36	-9.38928	down
AT3G48390.1	26	35	36	7	3	4	6.26406	7.86085	8.95834	1.86219	0.735759	1.03032	1.8146e-06	-2.84074	down
AT3G48420.1	330	372	255	44	39	43	79.5054	83.5496	63.4549	11.7052	9.56487	11.0759	1.32207e-48	-3.16167	down
AT3G48450.1	3	3	1	32	24	30	0.722777	0.673787	0.248843	8.51286	5.88607	7.72736	3.03998e-05	2.99264	up
AT3G48500.2	54	71	57	21	22	20	13.01	15.9463	14.184	5.58656	5.39557	5.15158	1.37456e-06	-1.75605	down
AT3G48560.1	1074	1110	931	532	543	473	258.754	249.301	231.673	141.526	133.172	121.835	1.39666e-39	-1.2796	down
AT3G48700.1	3	10	6	27	47	39	0.722777	2.24596	1.49306	7.18273	11.5269	10.0456	0.000363771	2.14595	up
AT3G48720.1	104	108	97	24	38	30	25.0563	24.2563	24.1377	6.38464	9.31961	7.72736	8.55442e-12	-1.99172	down
AT3G48730.1	426	463	359	235	227	192	102.634	103.988	89.3345	62.5163	55.6724	49.4551	6.05751e-16	-1.19824	down
AT3G48850.1	3	2	1	16	18	30	0.722777	0.449191	0.248843	4.25643	4.41455	7.72736	0.000806824	2.71982	up
AT3G48990.1	1416	1522	1286	473	580	481	341.151	341.835	320.012	125.831	142.247	123.895	2.4791e-85	-1.73355	down
AT3G49110.1	27	50	36	101	174	107	6.50499	11.2298	8.95834	26.8687	42.674	27.5609	2.52573e-05	1.44909	up
AT3G49120.1	234	313	270	2214	2336	2428	56.3766	70.2984	67.1875	588.983	572.911	625.401	4.32521e-194	2.81751	up
AT3G49140.1	117	169	155	65	61	36	28.1883	37.9567	38.5706	17.2917	14.9604	9.27284	4.64061e-09	-1.68892	down
AT3G49210.1	19	37	31	86	79	66	4.57759	8.31004	7.71412	22.8783	19.375	17.0002	0.003802	1.11294	up
AT3G49260.1	80	83	78	35	45	52	19.274	18.6414	19.4097	9.31094	11.0364	13.3941	0.000270125	-1.12477	down
AT3G49350.1	50	64	46	156	165	155	12.0463	14.3741	11.4468	41.5002	40.4667	39.9247	6.11497e-08	1.28829	up
AT3G49470.1	175	236	193	109	126	116	42.162	53.0046	48.0266	28.9969	30.9019	29.8791	4.20322e-08	-1.04732	down
AT3G49620.1	29	38	23	7	2	0	6.98684	8.53463	5.72338	1.86219	0.490506	0	1.28322e-05	-3.17805	down
[truncated: 2,718 more rows]

## Sheet: B vs D
#ID	B1_Count	B2_Count	B3_Count	D1_Count	D2_Count	D3_Count	B1_CPM	B2_CPM	B3_CPM	D1_CPM	D2_CPM	D3_CPM	FDR	log2FC	regulated
AT1G04140.1	121	161	201	61	56	44	30.1987	41.9026	50.1616	14.665	13.327	11.6836	3.81551e-07	-1.19227	down
AT1G07135.1	192	164	215	51	64	55	47.9186	42.6834	53.6554	12.2609	15.2309	14.6045	5.88278e-12	-1.40404	down
AT1G27730.1	536	466	608	183	197	168	133.773	121.283	151.732	43.9951	46.8826	44.6101	3.15712e-25	-1.43728	down
AT1G32190.1	33	29	38	0	0	0	8.23602	7.54767	9.48328	0	0	0	2.92086e-07	-1.29274	down
AT1G32190.2	0	0	0	35	20	27	0	0	0	8.41437	4.75965	7.16948	4.60326e-05	1.04875	up
AT1G33055.1	593	738	625	210	280	179	147.999	192.075	155.975	50.4862	66.6351	47.531	1.8001e-20	-1.40921	down
AT1G35140.1	176	152	183	59	50	35	43.9254	39.5602	45.6695	14.1842	11.8991	9.29376	1.93769e-11	-1.429	down
AT1G49670.1	0	0	0	162	113	122	0	0	0	38.9465	26.892	32.3954	1.73359e-35	2.8995	up
AT1G49670.2	122	96	118	0	0	0	30.4483	24.9854	29.4481	0	0	0	3.15854e-32	-2.77163	down
AT1G67140.2	0	0	0	27	25	23	0	0	0	6.49109	5.94956	6.10733	8.02678e-05	1.01937	up
AT1G74910.3	0	0	0	283	153	300	0	0	0	68.0362	36.4113	79.6608	3.34259e-48	3.33686	up
AT1G76650.1	345	305	384	65	76	79	86.1038	79.3807	95.831	15.6267	18.0867	20.9774	1.6372e-29	-1.91174	down
AT1G77120.1	119	251	140	57	61	49	29.6996	65.3264	34.9384	13.7034	14.5169	13.0113	2.09503e-05	-1.1153	down
AT1G77640.1	155	129	208	37	49	52	38.6843	33.5741	51.9085	8.89519	11.6611	13.8079	9.60739e-09	-1.33458	down
AT1G80840.1	155	65	101	26	13	36	38.6843	16.9172	25.2056	6.25068	3.09377	9.5593	0.000161115	-1.09832	down
AT2G16060.1	177	197	208	98	82	50	44.175	51.2721	51.9085	23.5602	19.5146	13.2768	1.47562e-06	-1.07756	down
AT2G36690.1	176	146	182	66	56	53	43.9254	37.9986	45.4199	15.8671	13.327	14.0734	5.0594e-09	-1.23006	down
AT2G39730.3	59	42	17	135	125	126	14.725	10.9311	4.24252	32.4554	29.7478	33.4576	0.000452602	1.01962	up
AT2G44370.1	145	105	152	60	53	46	36.1886	27.3278	37.9331	14.4246	12.6131	12.2147	3.22924e-05	-1.02109	down
AT2G45220.1	1026	652	971	384	338	291	256.065	169.693	242.323	92.3177	80.4381	77.271	2.81677e-17	-1.26851	down
AT3G02550.1	343	440	390	74	78	53	85.6047	114.516	97.3284	17.7904	18.5626	14.0734	1.20557e-36	-2.15145	down
AT3G04640.1	214	195	238	109	91	78	53.4093	50.7516	59.3953	26.2048	21.6564	20.7118	1.15008e-07	-1.04437	down
AT3G10040.1	95	131	107	10	13	9	23.7097	34.0947	26.7029	2.40411	3.09377	2.38983	1.61475e-17	-2.01272	down
AT3G10930.1	114	97	114	30	28	35	28.4517	25.2457	28.4498	7.21232	6.66351	9.29376	1.84018e-07	-1.26985	down
AT3G15640.1	0	0	0	200	192	174	0	0	0	48.0821	45.6926	46.2033	1.71955e-55	3.50486	up
AT3G15640.2	167	186	196	0	0	0	41.6792	48.4092	48.9138	0	0	0	1.78621e-54	-3.47988	down
AT3G20970.1	95	90	100	0	0	0	23.7097	23.4238	24.956	0	0	0	1.72848e-27	-2.57608	down
AT3G20970.2	0	0	0	79	67	79	0	0	0	18.9924	15.9448	20.9774	1.97893e-19	2.18705	up
AT3G23170.1	360	296	406	120	120	109	89.8475	77.0383	101.321	28.8493	28.5579	28.9434	5.45662e-18	-1.41982	down
AT3G25230.1	0	0	0	256	212	208	0	0	0	61.5451	50.4523	55.2315	7.9519e-64	3.72171	up
AT3G25230.2	215	195	247	0	0	0	53.6589	50.7516	61.6413	0	0	0	9.1552e-64	-3.71662	down
AT3G44260.1	284	269	313	96	78	101	70.8797	70.0112	78.1123	23.0794	18.5626	26.8191	1.27118e-15	-1.41931	down
AT3G45050.2	66	63	55	0	0	0	16.472	16.3967	13.7258	0	0	0	6.13479e-16	-1.98137	down
AT3G45050.4	0	0	0	59	78	56	0	0	0	14.1842	18.5626	14.87	6.97367e-16	1.97733	up
AT3G61190.1	147	145	187	59	46	65	36.6877	37.7384	46.6677	14.1842	10.9472	17.2598	6.66737e-07	-1.14507	down
AT3G62800.1	0	0	0	29	43	35	0	0	0	6.97191	10.2332	9.29376	2.05352e-07	1.31017	up
AT3G62800.2	35	43	40	0	0	0	8.73517	11.1914	9.9824	0	0	0	5.08364e-09	-1.46341	down
AT4G00420.2	29	36	58	0	0	0	7.23771	9.36953	14.4745	0	0	0	2.94737e-08	-1.39027	down
AT4G00520.2	25	38	33	0	0	0	6.23941	9.89006	8.23548	0	0	0	1.18892e-06	-1.22747	down
AT4G00520.3	0	0	0	38	37	37	0	0	0	9.1356	8.80535	9.82484	3.11233e-08	1.39233	up
AT4G01250.1	217	177	194	72	82	76	54.1581	46.0668	48.4146	17.3096	19.5146	20.1807	1.38147e-08	-1.13391	down
AT4G10265.1	83	109	90	10	11	7	20.7148	28.3688	22.4604	2.40411	2.61781	1.85875	5.9833e-15	-1.88741	down
AT4G10270.1	411	466	352	88	90	68	102.576	121.283	87.8451	21.1561	21.4184	18.0565	8.30103e-34	-2.0104	down
AT4G14880.3	40	58	30	0	0	0	9.98305	15.0953	7.4868	0	0	0	9.1319e-09	-1.43731	down
AT4G14880.4	0	0	0	48	54	39	0	0	0	11.5397	12.8511	10.3559	7.44106e-11	1.62402	up
AT4G17490.1	414	305	364	109	119	129	103.325	79.3807	90.8398	26.2048	28.3199	34.2542	2.67518e-16	-1.39544	down
AT4G24110.1	209	241	237	57	61	53	52.1614	62.7238	59.1457	13.7034	14.5169	14.0734	2.81443e-19	-1.66752	down
AT4G24570.1	270	212	318	52	86	71	67.3856	55.1761	79.3601	12.5014	20.4665	18.8531	7.54517e-14	-1.53062	down
AT4G27280.1	613	521	663	160	192	162	152.99	135.598	165.458	38.4657	45.6926	43.0169	4.71261e-34	-1.66386	down
AT4G32480.1	1276	1251	1393	629	650	646	318.459	325.591	347.637	151.218	154.689	171.536	5.10884e-28	-1.01256	down
AT4G33560.1	53	94	63	21	8	15	13.2275	24.4649	15.7223	5.04862	1.90386	3.98304	7.96544e-05	-1.13452	down
AT5G14740.3	462	261	804	0	0	0	115.304	67.9291	200.646	0	0	0	2.10685e-09	-1.46686	down
AT5G15120.1	70	86	90	27	26	28	17.4703	22.3828	22.4604	6.49109	6.18755	7.43501	0.00012823	-1.05739	down
AT5G17350.1	65	63	62	9	12	20	16.2225	16.3967	15.4727	2.1637	2.85579	5.31072	4.85712e-05	-1.15436	down
AT5G20230.1	1668	1423	1522	775	744	633	416.293	370.357	379.83	186.318	177.059	168.084	5.93971e-36	-1.09245	down
AT5G28020.6	30	18	45	0	0	0	7.48729	4.68476	11.2302	0	0	0	1.59586e-05	-1.10021	down
AT5G36170.2	97	84	116	0	0	0	24.2089	21.8622	28.949	0	0	0	1.72848e-27	-2.57665	down
AT5G39580.2	1627	1442	1817	880	728	695	406.061	375.302	453.45	211.561	173.251	184.548	1.45557e-25	-1.0633	down
AT5G48430.1	157	94	170	55	51	45	39.1835	24.4649	42.4252	13.2226	12.1371	11.9491	2.65101e-05	-1.07118	down
AT5G49215.2	0	0	0	22	29	31	0	0	0	5.28903	6.90149	8.23162	3.16772e-05	1.06958	up
AT5G51190.1	496	428	517	126	142	116	123.79	111.393	129.023	30.2917	33.7935	30.8022	1.48969e-34	-1.74143	down
AT5G57560.1	398	285	398	118	130	123	99.3314	74.1754	99.3249	28.3685	30.9377	32.6609	3.4379e-15	-1.34781	down
AT5G59820.1	262	252	312	85	109	117	65.389	65.5867	77.8627	20.4349	25.9401	31.0677	6.4003e-10	-1.18875	down
AT5G64100.1	2234	1757	2185	925	756	696	557.553	457.285	545.289	222.38	179.915	184.813	1.03773e-38	-1.3388	down
ONT.13193.3	117	114	151	48	63	28	29.2004	29.6702	37.6836	11.5397	14.9929	7.43501	0.000108077	-1.03366	down
ONT.14787.3	104	83	148	30	37	47	25.9559	21.602	36.9349	7.21232	8.80535	12.4802	0.000334444	-1.01431	down
ONT.16172.11	271	263	234	74	115	83	67.6352	68.4496	58.397	17.7904	27.368	22.0395	1.11754e-10	-1.25619	down
ONT.16172.7	635	581	587	215	230	205	158.481	151.214	146.492	51.6883	54.736	54.4349	5.94657e-31	-1.39691	down
ONT.17205.1	82	141	99	28	21	24	20.4653	36.6973	24.7064	6.7315	4.99763	6.37287	9.25554e-08	-1.35968	down
ONT.18324.1	175	129	181	72	60	47	43.6758	33.5741	45.1704	17.3096	14.279	12.4802	7.87474e-07	-1.125	down
ONT.19039.2	221	178	193	35	78	39	55.1564	46.3271	48.1651	8.41437	18.5626	10.3559	8.18501e-10	-1.42192	down
ONT.6197.1	270	226	265	97	98	93	67.3856	58.8198	66.1334	23.3198	23.3223	24.6949	4.29648e-12	-1.22389	down
ONT.7430.2	87	93	61	21	14	27	21.7131	24.2046	15.2232	5.04862	3.33176	7.16948	6.92579e-05	-1.126	down

## Sheet: C vs D
#ID	C1_Count	C2_Count	C3_Count	D1_Count	D2_Count	D3_Count	C1_CPM	C2_CPM	C3_CPM	D1_CPM	D2_CPM	D3_CPM	FDR	log2FC	regulated
AT1G01170.1	575	644	544	1433	1701	1490	152.965	157.943	140.123	344.508	404.808	395.649	1.28496e-83	1.7531	up
AT1G01320.2	139	106	114	209	208	211	36.9777	25.9968	29.364	50.2458	49.5004	56.0281	6.10543e-11	1.16047	up
AT1G01453.1	24	16	26	0	0	0	6.38464	3.92405	6.69705	0	0	0	1.29762e-06	-4.77247	down
AT1G01480.1	13	17	16	2	0	2	3.45835	4.1693	4.12126	0.480821	0	0.531072	0.000867941	-2.69025	down
AT1G01600.1	31	31	31	9	10	7	8.24683	7.60284	7.98494	2.1637	2.37983	1.85875	0.00367123	-1.41549	down
AT1G01620.1	773	767	705	1946	2191	1932	205.639	188.109	181.593	467.839	521.42	513.016	3.79672e-121	1.7951	up
AT1G01660.1	14	17	21	1	1	0	3.72438	4.1693	5.40915	0.240411	0.237983	0	6.08159e-05	-3.47704	down
AT1G01750.1	92	132	141	13	5	7	24.4745	32.3734	36.3186	3.12534	1.18991	1.85875	1.55855e-18	-3.3915	down
AT1G01860.1	7	8	9	22	14	20	1.86219	1.96202	2.31821	5.28903	3.33176	5.31072	0.00706266	1.49751	up
AT1G01970.1	28	19	27	55	62	44	7.44875	4.65981	6.95463	13.2226	14.7549	11.6836	2.40025e-05	1.4416	up
AT1G02150.1	133	145	142	374	338	337	35.3816	35.5617	36.5762	89.9136	80.4381	89.4857	3.06256e-38	1.67707	up
AT1G02340.1	33	28	27	85	85	78	8.77889	6.86708	6.95463	20.4349	20.2285	20.7118	9.41351e-12	1.82778	up
AT1G02360.1	193	212	241	58	39	30	51.3432	51.9936	62.0765	13.9438	9.28132	7.96608	2.02071e-17	-1.96996	down
AT1G02430.1	13	7	16	3	0	0	3.45835	1.71677	4.12126	0.721232	0	0	0.00527196	-2.59739	down
AT1G02450.1	37	62	59	1	0	0	9.84299	15.2057	15.1971	0.240411	0	0	8.87197e-11	-5.32438	down
AT1G02460.1	10	13	11	2	1	1	2.66027	3.18829	2.83337	0.480821	0.237983	0.265536	0.00681364	-2.30265	down
AT1G02470.1	97	119	124	39	35	45	25.8046	29.1851	31.9398	9.37601	8.32939	11.9491	1.42081e-05	-1.13179	down
AT1G02570.1	24	18	17	2	2	2	6.38464	4.41455	4.37884	0.480821	0.475965	0.531072	0.000262239	-2.61266	down
AT1G02610.1	49	54	48	223	245	212	13.0353	13.2437	12.3638	53.6116	58.3057	56.2937	6.40427e-44	2.51543	up
AT1G02640.1	31	44	27	91	97	72	8.24683	10.7911	6.95463	21.8774	23.0843	19.1186	8.04309e-10	1.68542	up
AT1G02660.1	50	63	55	156	170	171	13.3013	15.4509	14.1668	37.5041	40.457	45.4067	4.63751e-22	1.9158	up
AT1G02810.1	42	45	53	19	11	18	11.1731	11.0364	13.6517	4.5678	2.61781	4.77965	0.00599725	-1.14324	down
AT1G02816.1	77	66	67	107	112	126	20.4841	16.1867	17.2578	25.7239	26.654	33.4576	1.96632e-06	1.07132	up
AT1G02820.1	1	1	2	15	24	16	0.266027	0.245253	0.515158	3.60616	5.71158	4.24858	1.54718e-06	3.5815	up
AT1G02880.3	62	76	91	27	16	24	16.4937	18.6392	23.4397	6.49109	3.80772	6.37287	7.44696e-05	-1.37599	down
AT1G02900.1	291	334	324	90	113	103	77.4138	81.9145	83.4555	21.637	26.892	27.3502	1.54511e-15	-1.2613	down
AT1G02920.1	1132	1093	1129	406	292	266	301.142	268.062	290.806	97.6067	69.4909	70.6326	1.05248e-31	-1.43943	down
AT1G02930.1	1465	1581	1566	297	275	253	389.729	387.745	403.368	71.402	65.4452	67.1806	1.06351e-155	-2.11883	down
AT1G03090.2	53	75	55	464	490	457	14.0994	18.394	14.1668	111.551	116.611	121.35	2.35631e-100	3.29481	up
AT1G03130.1	1028	1132	983	3749	4005	3461	273.476	277.626	253.2	901.299	953.12	919.021	7.54119e-296	2.19591	up
AT1G03220.1	460	462	459	1089	1120	940	122.372	113.307	118.229	261.807	266.54	249.604	3.37394e-90	1.54696	up
AT1G03310.1	6	0	0	17	34	18	1.59616	0	0	4.08698	8.09141	4.77965	1.72527e-05	3.32542	up
AT1G03410.1	67	71	71	21	15	15	17.8238	17.413	18.2881	5.04862	3.56974	3.98304	1.23512e-06	-1.6373	down
AT1G03475.1	250	301	252	434	449	412	66.5067	73.8212	64.9099	104.338	106.854	109.401	4.20268e-21	1.05093	up
AT1G03520.1	23	20	22	41	52	41	6.11862	4.90506	5.66673	9.85684	12.3751	10.887	0.000119869	1.36976	up
AT1G03600.1	116	103	102	803	939	760	30.8591	25.2611	26.273	193.05	223.466	201.807	3.10328e-149	3.31079	up
AT1G03610.1	50	66	57	106	125	115	13.3013	16.1867	14.682	25.4835	29.7478	30.5367	8.19712e-10	1.35308	up
AT1G03680.1	395	454	419	1387	1357	1249	105.081	111.345	107.926	333.45	322.942	331.655	4.40536e-179	2.01518	up
AT1G03790.1	2	2	2	22	10	23	0.532054	0.490506	0.515158	5.28903	2.37983	6.10733	1.26831e-05	3.14682	up
AT1G03820.1	19	30	41	4	5	2	5.05451	7.35759	10.5607	0.961642	1.18991	0.531072	7.63243e-05	-2.45985	down
AT1G03850.2	169	135	138	423	372	279	44.9585	33.1092	35.5459	101.694	88.5295	74.0846	6.95917e-22	1.62216	up
AT1G04010.1	17	24	19	6	3	4	4.52246	5.88607	4.894	1.44246	0.713948	1.06214	0.00686548	-1.70411	down
AT1G04120.1	23	76	60	9	18	16	6.11862	18.6392	15.4547	2.1637	4.28369	4.24858	0.00840834	-1.42374	down
AT1G04220.1	88	90	68	10	6	8	23.4104	22.0728	17.5154	2.40411	1.4279	2.12429	3.5074e-13	-2.89292	down
AT1G04330.1	21	29	28	1	2	0	5.58656	7.11234	7.21221	0.240411	0.475965	0	1.74767e-06	-3.68637	down
AT1G04420.1	109	115	115	258	283	245	28.9969	28.2041	29.6216	62.0259	67.3491	65.0563	7.46186e-27	1.56797	up
AT1G04640.1	63	67	53	102	124	87	16.7597	16.432	13.6517	24.5219	29.5098	23.1016	1.39304e-06	1.12174	up
AT1G04800.1	767	908	728	1937	1927	1865	204.043	222.69	187.517	465.675	458.592	495.225	1.13127e-103	1.6171	up
AT1G04970.1	42	47	28	72	86	68	11.1731	11.5269	7.21221	17.3096	20.4665	18.0565	7.34958e-06	1.29186	up
AT1G04980.1	170	201	182	53	35	42	45.2246	49.2959	46.8793	12.7418	8.32939	11.1525	2.05221e-15	-1.70906	down
AT1G05020.1	20	15	16	29	36	35	5.32054	3.6788	4.12126	6.97191	8.56737	9.29376	0.00189544	1.29237	up
AT1G05140.1	38	56	48	99	96	81	10.109	13.7342	12.3638	23.8007	22.8463	21.5084	7.9368e-08	1.30566	up
AT1G05170.1	71	92	74	35	26	24	18.8879	22.5633	19.0608	8.41437	6.18755	6.37287	0.000314718	-1.09831	down
AT1G05190.1	612	652	597	1592	1731	1492	162.808	159.905	153.775	382.734	411.948	396.18	1.40778e-137	1.7317	up
AT1G05210.1	58	67	59	16	27	21	15.4296	16.432	15.1971	3.84657	6.42553	5.57626	0.00141866	-1.13142	down
AT1G05220.1	16	19	19	2	3	3	4.25643	4.65981	4.894	0.480821	0.713948	0.796608	0.00170753	-2.15911	down
AT1G05250.1	670	770	909	50	31	34	178.238	188.845	234.139	12.0205	7.37746	9.02823	1.89305e-91	-3.95905	down
AT1G05260.1	318	381	361	83	66	61	84.5965	93.4414	92.9859	19.9541	15.7068	16.1977	2.54598e-33	-1.96316	down
AT1G05300.1	352	397	444	88	78	70	93.6415	97.3654	114.365	21.1561	18.5626	18.5875	1.99392e-33	-1.96635	down
AT1G05385.1	74	51	73	130	153	159	19.686	12.5079	18.8033	31.2534	36.4113	42.2202	1.80512e-10	1.50448	up
AT1G05560.1	32	40	50	72	91	46	8.51286	9.81012	12.8789	17.3096	21.6564	12.2147	0.00105831	1.1045	up
AT1G05620.1	91	102	117	46	37	36	24.2084	25.0158	30.1367	11.0589	8.80535	9.5593	0.000128386	-1.00794	down
AT1G05675.1	26	33	26	6	3	2	6.9167	8.09335	6.69705	1.44246	0.713948	0.531072	5.71431e-05	-2.40094	down
AT1G05700.1	31	40	29	5	6	2	8.24683	9.81012	7.46979	1.20205	1.4279	0.531072	1.48507e-05	-2.41811	down
AT1G05710.2	56	49	58	13	13	10	14.8975	12.0174	14.9396	3.12534	3.09377	2.65536	7.22226e-06	-1.76617	down
AT1G05830.1	29	30	22	5	0	0	7.71478	7.35759	5.66673	1.20205	0	0	1.6422e-05	-3.20153	down
AT1G05970.2	35	39	42	62	53	72	9.31094	9.56487	10.8183	14.9055	12.6131	19.1186	0.000722912	1.03971	up
AT1G05990.1	6	10	18	1	1	0	1.59616	2.45253	4.63642	0.240411	0.237983	0	0.00270363	-2.8713	down
AT1G06000.1	66	68	62	14	14	6	17.5578	16.6772	15.9699	3.36575	3.33176	1.59322	5.50287e-08	-2.10662	down
AT1G06040.1	122	172	181	341	459	357	32.4553	42.1835	46.6218	81.98	109.234	94.7964	2.31376e-20	1.63825	up
AT1G06090.1	44	56	54	19	11	6	11.7052	13.7342	13.9093	4.5678	2.61781	1.59322	0.000133582	-1.68012	down
AT1G06120.1	12	14	8	1	2	0	3.19232	3.43354	2.06063	0.240411	0.475965	0	0.00433367	-2.56453	down
AT1G06160.1	125	109	119	14	24	12	33.2534	26.7326	30.6519	3.36575	5.71158	3.18643	1.30009e-14	-2.41287	down
AT1G06360.1	135	150	99	37	37	30	35.9136	36.788	25.5003	8.89519	8.80535	7.96608	1.52387e-08	-1.50077	down
AT1G06390.2	15	20	18	31	37	34	3.9904	4.90506	4.63642	7.45273	8.80535	9.02823	0.00153021	1.27184	up
AT1G06460.1	626	708	654	1142	1121	1059	166.533	173.639	168.457	274.549	266.778	281.203	1.00229e-58	1.10276	up
AT1G06475.1	19	28	38	6	10	6	5.05451	6.86708	9.78799	1.44246	2.37983	1.59322	0.00807901	-1.49607	down
AT1G06550.1	67	70	84	22	30	30	17.8238	17.1677	21.6366	5.28903	7.13948	7.96608	0.00133712	-1.04418	down
AT1G06640.1	1780	1744	1861	483	434	422	473.528	427.721	479.354	116.118	103.284	112.056	1.078e-95	-1.64539	down
AT1G06680.1	1190	1347	1198	7406	7892	6818	316.572	330.356	308.579	1780.48	1878.16	1810.43	0	2.92653	up
AT1G06690.1	10	17	22	27	38	31	2.66027	4.1693	5.66673	6.49109	9.04334	8.23162	0.00480834	1.28584	up
AT1G06830.1	79	94	87	7	15	9	21.0161	23.0538	22.4094	1.68287	3.56974	2.38983	9.6435e-13	-2.62701	down
AT1G06950.1	205	212	185	407	380	360	54.5355	51.9936	47.6521	97.8471	90.4334	95.593	1.30441e-27	1.28806	up
AT1G06980.1	10	19	6	26	34	22	2.66027	4.65981	1.54547	6.25068	8.09141	5.84179	0.00362974	1.51517	up
AT1G07000.1	222	223	227	46	46	39	59.058	54.6914	58.4704	11.0589	10.9472	10.3559	1.2431e-24	-1.98296	down
AT1G07050.1	8	9	11	39	30	40	2.12821	2.20728	2.83337	9.37601	7.13948	10.6214	4.93497e-07	2.23351	up
AT1G07090.1	266	293	284	91	101	99	70.7631	71.8591	73.1524	21.8774	24.0362	26.2881	9.90926e-14	-1.16427	down
AT1G07110.1	39	35	68	144	143	139	10.375	8.58386	17.5154	34.6191	34.0315	36.9095	3.65891e-13	1.91643	up
AT1G07175.1	8	9	9	1	1	0	2.12821	2.20728	2.31821	0.240411	0.237983	0	0.00790348	-2.58186	down
AT1G07180.1	3	5	6	18	15	12	0.798081	1.22627	1.54547	4.32739	3.56974	3.18643	0.00280956	1.88494	up
AT1G07260.1	28	44	42	16	6	6	7.44875	10.7911	10.8183	3.84657	1.4279	1.59322	0.00225559	-1.58536	down
AT1G07280.1	55	66	56	103	116	106	14.6315	16.1867	14.4244	24.7623	27.606	28.1468	1.45383e-08	1.2299	up
AT1G07280.3	2	3	4	10	13	10	0.532054	0.735759	1.03032	2.40411	3.09377	2.65536	0.00574939	2.00438	up
AT1G07400.1	19	17	15	66	59	38	5.05451	4.1693	3.86368	15.8671	14.041	10.0904	6.63333e-08	1.97242	up
AT1G07440.2	53	27	44	65	99	92	14.0994	6.62183	11.3335	15.6267	23.5603	24.4293	5.43934e-05	1.37512	up
AT1G07520.1	24	35	22	2	7	4	6.38464	8.58386	5.66673	0.480821	1.66588	1.06214	0.000527787	-2.10279	down
AT1G07620.1	85	106	102	16	13	20	22.6123	25.9968	26.273	3.84657	3.09377	5.31072	1.23118e-11	-2.16441	down
AT1G07630.1	192	230	175	68	66	58	51.0772	56.4082	45.0763	16.3479	15.7068	15.4011	5.82833e-11	-1.26368	down
AT1G07670.1	173	186	189	61	68	66	46.0226	45.6171	48.6824	14.665	16.1828	17.5254	4.40023e-09	-1.11879	down
AT1G07680.1	17	24	23	0	0	1	4.52246	5.88607	5.92431	0	0	0.265536	3.83961e-06	-4.16576	down
AT1G07890.6	43	50	19	4	10	10	11.4392	12.2627	4.894	0.961642	2.37983	2.65536	0.00296852	-1.7259	down
AT1G07985.1	1	0	1	24	30	20	0.266027	0	0.257579	5.76985	7.13948	5.31072	6.74406e-09	4.57059	up
AT1G08050.1	57	71	84	19	15	7	15.1635	17.413	21.6366	4.5678	3.56974	1.85875	7.18475e-07	-1.95563	down
AT1G08090.1	178	199	224	0	0	0	47.3528	48.8053	57.6977	0	0	0	1.22857e-20	-7.52642	down
AT1G08165.1	0	1	4	14	11	6	0	0.245253	1.03032	3.36575	2.61781	1.59322	0.00340522	2.50369	up
AT1G08230.2	18	17	21	36	26	33	4.78848	4.1693	5.40915	8.65478	6.18755	8.76269	0.0097273	1.09004	up
AT1G08250.1	153	178	169	56	51	49	40.7021	43.655	43.5308	13.463	12.1371	13.0113	8.26046e-11	-1.30696	down
AT1G08290.1	13	16	19	4	3	2	3.45835	3.92405	4.894	0.961642	0.713948	0.531072	0.00836651	-1.86008	down
AT1G08340.1	37	39	46	11	6	5	9.84299	9.56487	11.8486	2.64452	1.4279	1.32768	2.83971e-05	-2.01836	down
AT1G08380.1	2229	2522	2294	15771	16928	15176	592.974	618.528	590.886	3791.52	4028.57	4029.78	0	3.1266	up
AT1G08450.1	815	894	987	344	340	338	216.812	219.256	254.23	82.7013	80.9141	89.7512	1.22255e-22	-1.03378	down
AT1G08520.1	173	185	171	340	398	362	46.0226	45.3718	44.046	81.7396	94.717	96.1241	1.62746e-26	1.4154	up
AT1G08540.1	52	76	73	160	156	146	13.8334	18.6392	18.8033	38.4657	37.1253	38.7683	3.53054e-15	1.55237	up
AT1G08550.1	35	32	44	168	203	177	9.31094	7.8481	11.3335	40.389	48.3105	46.9999	3.7551e-33	2.6378	up
AT1G08570.1	148	171	161	300	337	279	39.372	41.9383	41.4702	72.1232	80.2001	74.0846	8.94568e-22	1.28946	up
AT1G08570.3	0	0	3	12	5	9	0	0	0.772736	2.88493	1.18991	2.38983	0.00332969	2.75034	up
AT1G08610.1	11	15	17	39	26	25	2.9263	3.6788	4.37884	9.37601	6.18755	6.6384	0.00236467	1.36992	up
AT1G08630.2	3	3	3	772	785	745	0.798081	0.735759	0.772736	185.597	186.816	197.824	1.65203e-80	7.98374	up
AT1G08660.2	0	0	0	26	20	19	0	0	0	6.25068	4.75965	5.04519	1.57537e-08	5.33732	up
AT1G08810.1	8	3	10	29	13	26	2.12821	0.735759	2.57579	6.97191	3.09377	6.90394	0.00181443	1.90511	up
AT1G08980.1	121	124	119	362	311	309	32.1892	30.4114	30.6519	87.0286	74.0126	82.0507	3.25031e-38	1.78575	up
AT1G08990.1	21	27	23	5	2	6	5.58656	6.62183	5.92431	1.20205	0.475965	1.59322	0.00155009	-1.92697	down
AT1G09010.1	73	63	76	134	106	102	19.42	15.4509	19.576	32.215	25.2261	27.0847	2.62975e-06	1.03701	up
AT1G09090.1	47	29	39	1	3	3	12.5033	7.11234	10.0456	0.240411	0.713948	0.796608	1.12085e-07	-3.34498	down
AT1G09130.2	4	6	6	30	31	24	1.06411	1.47152	1.54547	7.21232	7.37746	6.37287	3.73693e-07	2.61485	up
AT1G09210.1	674	829	730	307	292	232	179.302	203.315	188.033	73.8061	69.4909	61.6044	8.57677e-23	-1.06289	down
AT1G09240.1	420	500	501	138	135	93	111.731	122.627	129.047	33.1767	32.1276	24.6949	7.2233e-27	-1.59188	down
AT1G09340.1	123	134	144	836	842	774	32.7213	32.8639	37.0913	200.983	200.381	205.525	1.45617e-168	2.96691	up
AT1G09390.1	19	18	25	51	55	36	5.05451	4.41455	6.43947	12.2609	13.089	9.5593	3.42465e-05	1.50919	up
AT1G09415.1	57	71	67	158	177	157	15.1635	17.413	17.2578	37.9849	42.1229	41.6892	3.53297e-19	1.68652	up
AT1G09420.1	16	10	14	47	64	39	4.25643	2.45253	3.6061	11.2993	15.2309	10.3559	3.77297e-08	2.18599	up
AT1G09570.1	327	329	260	617	651	647	86.9908	80.6882	66.9705	148.333	154.927	171.802	5.93853e-33	1.42525	up
AT1G09575.1	13	26	14	37	31	39	3.45835	6.37658	3.6061	8.89519	7.37746	10.3559	0.00192456	1.34058	up
AT1G09710.1	12	15	6	34	32	21	3.19232	3.6788	1.54547	8.17396	7.61544	5.57626	0.000603695	1.67573	up
AT1G09750.1	349	316	277	537	556	457	92.8434	77.4999	71.3493	129.101	132.318	121.35	2.64126e-19	1.07373	up
AT1G09932.1	185	217	259	27	20	17	49.215	53.2199	66.7129	6.49109	4.75965	4.51411	1.24128e-29	-2.96501	down
AT1G09932.2	20	35	51	13	2	5	5.32054	8.58386	13.1365	3.12534	0.475965	1.32768	0.00346427	-1.88735	down
AT1G09970.1	269	297	297	105	96	110	71.5612	72.8401	76.5009	25.2431	22.8463	29.209	3.14109e-12	-1.10176	down
AT1G10060.2	52	55	40	76	93	100	13.8334	13.4889	10.3032	18.2712	22.1324	26.5536	5.31956e-06	1.22465	up
AT1G10070.1	48	69	64	269	238	186	12.7693	16.9225	16.485	64.6705	56.6398	49.3897	4.18515e-32	2.27646	up
AT1G10140.1	29	39	31	96	103	98	7.71478	9.56487	7.98494	23.0794	24.5122	26.0225	1.39563e-14	1.92544	up
AT1G10340.1	117	101	95	43	34	18	31.1251	24.7706	24.47	10.3377	8.09141	4.77965	1.5526e-05	-1.34682	down
AT1G10360.1	18	17	12	82	77	56	4.78848	4.1693	3.09095	19.7137	18.3247	14.87	9.02774e-14	2.48897	up
AT1G10400.1	26	13	14	3	1	2	6.9167	3.18829	3.6061	0.721232	0.237983	0.531072	0.00140718	-2.44276	down
AT1G10460.1	18	20	16	4	4	3	4.78848	4.90506	4.12126	0.961642	0.95193	0.796608	0.00659394	-1.77651	down
AT1G10522.2	44	23	20	83	84	42	11.7052	5.64082	5.15158	19.9541	19.9905	11.1525	0.000134057	1.55252	up
AT1G10560.1	21	17	16	0	3	4	5.58656	4.1693	4.12126	0	0.713948	1.06214	0.00208915	-2.28043	down
AT1G10657.1	26	32	37	0	3	9	6.9167	7.8481	9.53042	0	0.713948	2.38983	0.000561266	-2.34284	down
AT1G10657.3	12	12	17	0	1	1	3.19232	2.94304	4.37884	0	0.237983	0.265536	0.000455366	-3.15644	down
AT1G10660.2	96	97	82	175	171	149	25.5386	23.7895	21.1215	42.0719	40.695	39.5649	5.10543e-12	1.20108	up
AT1G10690.1	26	35	28	12	5	3	6.9167	8.58386	7.21221	2.88493	1.18991	0.796608	0.00286701	-1.69216	down
AT1G10770.1	7	6	3	17	26	27	1.86219	1.47152	0.772736	4.08698	6.18755	7.16948	4.48468e-05	2.33336	up
AT1G10810.1	10	21	12	0	0	0	2.66027	5.15031	3.09095	0	0	0	4.52174e-05	-4.22938	down
AT1G10910.1	29	23	19	39	60	42	7.71478	5.64082	4.894	9.37601	14.279	11.1525	0.000497896	1.3133	up
AT1G10960.1	470	494	482	872	846	753	125.033	121.155	124.153	209.638	201.333	199.949	3.96972e-49	1.13235	up
AT1G10970.1	128	149	140	18	26	16	34.0514	36.5427	36.061	4.32739	6.18755	4.24858	1.44577e-18	-2.3974	down
AT1G10990.2	65	85	64	20	26	13	17.2917	20.8465	16.485	4.80821	6.18755	3.45197	2.84706e-05	-1.46419	down
AT1G11170.1	43	61	64	11	16	14	11.4392	14.9604	16.485	2.64452	3.80772	3.71751	5.1133e-05	-1.61616	down
AT1G11180.1	21	14	17	43	37	41	5.58656	3.43354	4.37884	10.3377	8.80535	10.887	7.53597e-05	1.53298	up
AT1G11210.1	44	41	42	76	78	63	11.7052	10.0554	10.8183	18.2712	18.5626	16.7288	2.18909e-05	1.11632	up
AT1G11260.1	387	426	431	1041	1068	946	102.952	104.478	111.016	250.267	254.165	251.197	3.26256e-100	1.65569	up
AT1G11330.1	78	90	95	31	28	16	20.7501	22.0728	24.47	7.45273	6.66351	4.24858	3.94437e-06	-1.42838	down
AT1G11362.1	8	16	16	49	51	53	2.12821	3.92405	4.12126	11.7801	12.1371	14.0734	5.65163e-09	2.23445	up
AT1G11380.1	32	30	27	62	69	83	8.51286	7.35759	6.95463	14.9055	16.4208	22.0395	1.43172e-07	1.60531	up
AT1G11450.1	43	44	55	20	8	7	11.4392	10.7911	14.1668	4.80821	1.90386	1.85875	0.000693176	-1.60129	down
AT1G11530.1	280	312	300	814	928	755	74.4875	76.5189	77.2736	195.694	220.848	200.48	2.14055e-80	1.84277	up
AT1G11540.1	15	13	12	1	1	2	3.9904	3.18829	3.09095	0.240411	0.237983	0.531072	0.00222757	-2.51406	down
AT1G11580.1	630	671	650	128	86	78	167.597	164.565	167.426	30.7726	20.4665	20.7118	3.13616e-58	-2.37164	down
AT1G11655.1	14	13	15	0	1	1	3.72438	3.18829	3.86368	0	0.237983	0.265536	0.000337991	-3.19717	down
AT1G11670.1	149	158	156	54	49	55	39.638	38.75	40.1823	12.9822	11.6611	14.6045	1.44003e-08	-1.17698	down
AT1G11700.1	328	380	383	80	75	61	87.2568	93.1961	98.6527	19.2328	17.8487	16.1977	5.51501e-35	-1.96547	down
AT1G11740.1	100	89	84	127	160	152	26.6027	21.8275	21.6366	30.5321	38.0772	40.3615	4.44732e-07	1.04146	up
AT1G11820.2	52	76	59	122	144	144	13.8334	18.6392	15.1971	29.3301	34.2695	38.2372	1.69072e-11	1.48794	up
AT1G11840.1	777	876	1042	215	273	187	206.703	214.842	268.397	51.6883	64.9692	49.6553	2.4388e-28	-1.63178	down
AT1G11840.2	979	1038	900	387	203	305	260.44	254.573	231.821	93.0389	48.3105	80.9885	4.86308e-13	-1.33126	down
AT1G11860.1	355	438	390	1146	1142	1034	94.4395	107.421	100.456	275.511	271.776	274.564	1.02496e-121	1.85016	up
AT1G11860.2	0	0	0	10	12	11	0	0	0	2.40411	2.85579	2.9209	9.58493e-06	4.50018	up
AT1G12020.1	17	13	13	40	29	23	4.52246	3.18829	3.34852	9.61642	6.90149	6.10733	0.00185735	1.39451	up
AT1G12040.1	82	99	97	8	8	6	21.8142	24.28	24.9851	1.92328	1.90386	1.59322	1.63664e-16	-3.19004	down
AT1G12080.2	723	616	484	1970	2441	2258	192.337	151.076	124.668	473.609	580.915	599.581	6.06421e-26	2.21477	up
AT1G12090.1	3088	3113	2602	6770	7055	6296	821.491	763.473	670.22	1627.58	1678.97	1671.82	1.14646e-107	1.55315	up
AT1G12110.1	1357	1410	1343	371	369	346	360.998	345.807	345.928	89.1923	87.8156	91.8755	1.20614e-95	-1.55632	down
AT1G12160.1	74	65	67	19	9	5	19.686	15.9414	17.2578	4.5678	2.14184	1.32768	1.79157e-07	-2.21161	down
AT1G12230.1	23	35	5	151	203	42	6.11862	8.58386	1.28789	36.302	48.3105	11.1525	0.00246321	2.55061	up
AT1G12420.1	65	77	63	17	18	11	17.2917	18.8845	16.2275	4.08698	4.28369	2.9209	6.10211e-07	-1.75227	down
AT1G12440.1	279	331	277	805	854	745	74.2215	81.1787	71.3493	193.531	203.237	197.824	8.56063e-84	1.79816	up
AT1G12520.1	15	8	8	30	20	35	3.9904	1.96202	2.06063	7.21232	4.75965	9.29376	0.000811417	1.72875	up
AT1G12550.1	39	39	51	14	10	11	10.375	9.56487	13.1365	3.36575	2.37983	2.9209	0.000711629	-1.46876	down
AT1G12560.1	145	161	179	14	20	8	38.5739	39.4857	46.1066	3.36575	4.75965	2.12429	1.1128e-24	-3.10948	down
AT1G12780.1	168	199	189	842	861	892	44.6925	48.8053	48.6824	202.426	204.903	236.858	7.60703e-119	2.58245	up
AT1G12790.1	20	18	17	30	48	50	5.32054	4.41455	4.37884	7.21232	11.4232	13.2768	0.000162017	1.53899	up
AT1G12800.1	56	84	90	188	190	159	14.8975	20.6013	23.1821	45.1972	45.2167	42.2202	2.75727e-15	1.57221	up
AT1G12805.1	22	29	42	3	2	3	5.85259	7.11234	10.8183	0.721232	0.475965	0.796608	6.39963e-06	-2.89027	down
AT1G12860.1	18	29	22	48	49	42	4.78848	7.11234	5.66673	11.5397	11.6611	11.1525	0.000122223	1.34301	up
AT1G12900.1	529	597	535	3353	3553	3113	140.728	146.416	137.805	806.097	845.552	826.614	0	2.95263	up
AT1G12940.1	691	895	903	0	0	0	183.825	219.501	232.594	0	0	0	2.87428e-36	-9.29679	down
AT1G12950.1	43	62	57	2	6	4	11.4392	15.2057	14.682	0.480821	1.4279	1.06214	7.51806e-10	-3.18722	down
AT1G13110.1	1128	1137	1176	245	201	227	300.078	278.853	302.913	58.9006	47.8345	60.2767	9.00189e-86	-1.9875	down
AT1G13210.1	141	159	163	55	48	50	37.5098	38.9952	41.9853	13.2226	11.4232	13.2768	5.65163e-09	-1.22385	down
AT1G13245.1	271	303	317	976	1083	1081	72.0933	74.3117	81.6525	234.641	257.735	287.045	3.04492e-91	2.17851	up
AT1G13300.1	19	12	8	56	45	43	5.05451	2.94304	2.06063	13.463	10.7092	11.4181	1.08342e-07	2.16449	up
AT1G13340.1	54	49	63	8	13	9	14.3655	12.0174	16.2275	1.92328	3.09377	2.38983	1.07223e-06	-2.03491	down
AT1G13420.1	299	367	321	8	4	10	79.542	90.0079	82.6828	1.92328	0.95193	2.65536	1.09908e-52	-4.99608	down
AT1G13470.1	15	12	20	0	0	0	3.9904	2.94304	5.15158	0	0	0	1.9939e-05	-4.36386	down
AT1G13480.1	29	26	20	9	4	3	7.71478	6.37658	5.15158	2.1637	0.95193	0.796608	0.00346467	-1.74969	down
AT1G13510.1	14	23	26	2	2	1	3.72438	5.64082	6.69705	0.480821	0.475965	0.265536	9.79673e-05	-2.88644	down
AT1G13520.1	19	34	23	10	5	4	5.05451	8.3386	5.92431	2.40411	1.18991	1.06214	0.00947663	-1.53425	down
AT1G13580.3	16	24	26	7	5	4	4.25643	5.88607	6.69705	1.68287	1.18991	1.06214	0.00924755	-1.57126	down
AT1G13700.1	8	5	1	9	28	23	2.12821	1.22627	0.257579	2.1637	6.66351	6.10733	0.00189567	2.21746	up
AT1G13820.1	75	91	74	162	184	148	19.952	22.318	19.0608	38.9465	43.7888	39.2993	2.3171e-14	1.3942	up
AT1G13830.1	88	100	120	10	9	8	23.4104	24.5253	30.9095	2.40411	2.14184	2.12429	9.29835e-17	-3.05888	down
AT1G13930.1	3019	3596	3454	11174	11433	10200	803.135	881.93	889.677	2686.35	2720.85	2708.47	0	2.06586	up
AT1G13970.1	43	31	31	2	3	9	11.4392	7.60284	7.98494	0.480821	0.713948	2.38983	7.68384e-05	-2.34561	down
AT1G14010.1	294	309	312	112	109	111	78.2119	75.7832	80.3646	26.926	25.9401	29.4745	9.14041e-14	-1.09476	down
AT1G14030.1	7	14	5	21	27	23	1.86219	3.43354	1.28789	5.04862	6.42553	6.10733	0.0012793	1.72211	up
AT1G14040.1	25	32	32	8	7	4	6.65067	7.8481	8.24252	1.92328	1.66588	1.06214	0.000828225	-1.76944	down
AT1G14070.1	99	117	112	23	28	29	26.3367	28.6946	28.8488	5.52944	6.66351	7.70055	1.21218e-09	-1.64435	down
AT1G14080.1	46	64	55	1	5	4	12.2372	15.6962	14.1668	0.240411	1.18991	1.06214	1.73258e-10	-3.4352	down
AT1G14150.1	16	13	14	237	236	224	4.25643	3.18829	3.6061	56.9773	56.1639	59.4801	1.78207e-62	4.3153	up
AT1G14170.1	52	32	38	6	8	9	13.8334	7.8481	9.78799	1.44246	1.90386	2.38983	8.53165e-05	-1.9471	down
AT1G14170.3	238	234	285	82	91	85	63.3144	57.3892	73.41	19.7137	21.6564	22.5706	6.50895e-11	-1.18352	down
AT1G14220.1	13	21	16	1	1	3	3.45835	5.15031	4.12126	0.240411	0.237983	0.796608	0.000909414	-2.56031	down
AT1G14240.4	20	27	32	5	2	0	5.32054	6.62183	8.24252	1.20205	0.475965	0	4.59451e-05	-2.81904	down
AT1G14270.2	1	1	1	10	5	8	0.266027	0.245253	0.257579	2.40411	1.18991	2.12429	0.00336	2.6677	up
AT1G14280.1	58	47	51	127	156	137	15.4296	11.5269	13.1365	30.5321	37.1253	36.3784	4.1404e-16	1.77285	up
AT1G14290.1	71	63	58	117	124	107	18.8879	15.4509	14.9396	28.128	29.5098	28.4124	9.82009e-09	1.20736	up
AT1G14345.1	59	56	55	205	222	178	15.6956	13.7342	14.1668	49.2842	52.8321	47.2654	8.74477e-33	2.17506	up
AT1G14360.1	85	116	94	25	27	13	22.6123	28.4493	24.2124	6.01027	6.42553	3.45197	1.26712e-08	-1.78799	down
AT1G14370.1	274	265	251	94	71	69	72.8914	64.992	64.6523	22.5986	16.8968	18.322	1.23751e-15	-1.3879	down
AT1G14540.1	53	67	56	23	14	10	14.0994	16.432	14.4244	5.52944	3.33176	2.65536	0.000113525	-1.50396	down
AT1G14685.3	41	37	34	71	42	70	10.9071	9.07436	8.75768	17.0692	9.99527	18.5875	0.00225954	1.05232	up
AT1G14780.1	127	122	127	46	35	22	33.7854	29.9209	32.7125	11.0589	8.32939	5.84179	2.30595e-08	-1.49456	down
AT1G14890.1	415	404	372	1157	1158	1091	110.401	99.0822	95.8193	278.155	275.584	289.7	1.27736e-121	1.87556	up
AT1G14960.1	424	607	607	57	35	38	112.795	148.869	156.35	13.7034	8.32939	10.0904	1.11503e-54	-3.26114	down
AT1G15040.1	8	6	8	755	690	641	2.12821	1.47152	2.06063	181.51	164.208	170.209	3.06728e-110	6.77759	up
AT1G15040.2	0	0	0	54	58	66	0	0	0	12.9822	13.803	17.5254	1.51237e-14	6.60643	up
AT1G15180.1	23	26	18	93	94	82	6.11862	6.37658	4.63642	22.3582	22.3704	21.774	6.42744e-17	2.32856	up
AT1G15210.1	117	118	99	18	16	14	31.1251	28.9399	25.5003	4.32739	3.80772	3.71751	2.52018e-15	-2.39107	down
AT1G15240.3	11	18	13	0	0	0	2.9263	4.41455	3.34852	0	0	0	4.35375e-05	-4.22972	down
AT1G15260.1	80	80	68	181	210	183	21.2821	19.6202	17.5154	43.5143	49.9763	48.5931	5.00866e-21	1.68354	up
AT1G15330.1	1	0	0	6	7	4	0.266027	0	0	1.44246	1.66588	1.06214	0.00372339	3.03397	up
AT1G15380.1	46	38	34	435	447	372	12.2372	9.31961	8.75768	104.579	106.378	98.7794	4.22168e-101	3.74321	up
AT1G15410.1	87	73	57	22	19	35	23.1443	17.9035	14.682	5.28903	4.52167	9.29376	0.00405689	-1.1093	down
AT1G15460.1	10	5	10	0	0	0	2.66027	1.22627	2.57579	0	0	0	0.00107124	-3.60377	down
AT1G15510.1	10	12	11	25	25	25	2.66027	2.94304	2.83337	6.01027	5.94956	6.6384	0.00146284	1.48597	up
AT1G15520.1	4	8	8	0	0	0	1.06411	1.96202	2.06063	0	0	0	0.00308212	-3.34581	down
AT1G15610.2	13	11	9	0	0	0	3.45835	2.69778	2.31821	0	0	0	0.000198055	-3.95238	down
AT1G15630.1	21	13	14	0	0	0	5.58656	3.18829	3.6061	0	0	0	1.73299e-05	-4.38769	down
AT1G15640.1	14	23	29	4	1	0	3.72438	5.64082	7.46979	0.961642	0.237983	0	0.000143711	-2.9219	down
AT1G15730.1	46	60	32	100	139	108	12.2372	14.7152	8.24252	24.0411	33.0796	28.6779	6.04881e-10	1.67217	up
AT1G15790.2	133	125	154	33	34	23	35.3816	30.6566	39.6671	7.93355	8.09141	6.10733	1.7716e-12	-1.814	down
AT1G15820.1	2804	3028	2536	13447	14152	13457	745.939	742.626	653.22	3232.8	3367.93	3573.32	0	2.65755	up
AT1G15950.1	542	532	518	242	208	164	144.187	130.475	133.426	58.1794	49.5004	43.5479	2.99596e-15	-1.01517	down
AT1G15980.1	11	11	7	70	66	62	2.9263	2.69778	1.80305	16.8287	15.7068	16.4632	1.84861e-16	3.04087	up
AT1G16030.1	38	23	25	246	147	133	10.109	5.64082	6.43947	59.141	34.9834	35.3163	2.17121e-22	2.90208	up
AT1G16170.1	83	63	71	213	214	213	22.0802	15.4509	18.2881	51.2075	50.9283	56.5592	1.06949e-25	1.9082	up
AT1G16320.1	90	99	111	229	215	192	23.9424	24.28	28.5912	55.054	51.1662	50.9829	6.76345e-19	1.4363	up
AT1G16400.1	177	191	196	72	48	46	47.0868	46.8433	50.4854	17.3096	11.4232	12.2147	3.50423e-11	-1.39403	down
AT1G16410.1	80	98	80	14	12	17	21.2821	24.0348	20.6063	3.36575	2.85579	4.51411	1.14767e-10	-2.16454	down
AT1G16500.1	25	26	28	7	5	4	6.65067	6.37658	7.21221	1.68287	1.18991	1.06214	0.00100245	-1.82983	down
AT1G16670.1	62	69	63	25	34	15	16.4937	16.9225	16.2275	6.01027	8.09141	3.98304	0.00488176	-1.01259	down
AT1G16720.1	52	60	55	242	233	229	13.8334	14.7152	14.1668	58.1794	55.4499	60.8078	3.60094e-44	2.42344	up
AT1G16880.1	454	470	399	1503	1530	1429	120.776	115.269	102.774	361.337	364.113	379.451	2.279e-168	2.11433	up
AT1G17090.1	48	57	44	2	8	2	12.7693	13.9794	11.3335	0.480821	1.90386	0.531072	1.13128e-08	-3.0674	down
AT1G17100.1	83	115	96	234	248	196	22.0802	28.2041	24.7276	56.2561	59.0197	52.0451	7.29984e-21	1.55822	up
AT1G17170.1	59	53	66	25	17	18	15.6956	12.9984	17.0002	6.01027	4.0457	4.77965	0.00105253	-1.18265	down
AT1G17190.1	234	271	270	59	69	67	62.2503	66.4636	69.5463	14.1842	16.4208	17.7909	1.18044e-19	-1.61499	down
AT1G17200.1	226	257	224	364	393	380	60.1221	63.03	57.6977	87.5095	93.5271	100.904	1.04665e-17	1.04773	up
AT1G17220.1	101	97	84	278	262	254	26.8687	23.7895	21.6366	66.8342	62.3514	67.4462	2.40921e-33	1.84615	up
AT1G17250.1	30	29	23	9	2	0	7.98081	7.11234	5.92431	2.1637	0.475965	0	0.0010039	-2.3051	down
AT1G17285.1	23	16	19	1	1	1	6.11862	3.92405	4.894	0.240411	0.237983	0.265536	4.35097e-05	-3.29095	down
AT1G17590.1	40	35	49	2	8	2	10.6411	8.58386	12.6214	0.480821	1.90386	0.531072	8.90973e-07	-2.80541	down
AT1G17650.1	42	54	58	82	88	78	11.1731	13.2437	14.9396	19.7137	20.9425	20.7118	3.44899e-05	1.03801	up
AT1G17710.1	5	4	4	78	61	60	1.33013	0.981012	1.03032	18.752	14.5169	15.9322	6.11016e-19	4.08744	up
AT1G17744.1	9	7	5	0	0	0	2.39424	1.71677	1.28789	0	0	0	0.00233559	-3.41444	down
AT1G17745.1	596	688	629	37	29	32	158.552	168.734	162.017	8.89519	6.90149	8.49716	5.15951e-107	-3.89655	down
AT1G17810.1	1	0	1	47	57	64	0.266027	0	0.257579	11.2993	13.565	16.9943	3.87886e-15	5.68395	up
AT1G17970.1	34	52	36	69	58	76	9.04491	12.7532	9.27284	16.5883	13.803	20.1807	0.000379312	1.08823	up
AT1G18010.1	2	1	1	9	9	6	0.532054	0.245253	0.257579	2.1637	2.14184	1.59322	0.00475342	2.45229	up
AT1G18060.1	76	85	81	307	308	280	20.218	20.8465	20.8639	73.8061	73.2986	74.3501	4.24408e-51	2.23826	up
AT1G18100.1	51	66	69	24	19	21	13.5674	16.1867	17.7729	5.76985	4.52167	5.57626	0.000955737	-1.14903	down
AT1G18140.1	12	18	18	0	0	1	3.19232	4.41455	4.63642	0	0	0.265536	5.33355e-05	-3.78931	down
AT1G18150.2	20	28	25	8	7	4	5.32054	6.86708	6.43947	1.92328	1.66588	1.06214	0.00824666	-1.49126	down
AT1G18170.1	78	84	82	195	183	207	20.7501	20.6013	21.1215	46.8801	43.5508	54.966	1.22522e-19	1.61706	up
AT1G18210.1	1297	1409	1423	489	482	460	345.037	345.561	366.535	117.561	114.708	122.147	5.63489e-55	-1.16494	down
AT1G18330.1	36	50	38	114	117	83	9.57697	12.2627	9.78799	27.4068	27.844	22.0395	9.35937e-12	1.67842	up
AT1G18390.1	74	75	73	29	29	26	19.686	18.394	18.8033	6.97191	6.90149	6.90394	0.000584827	-1.02404	down
AT1G18460.1	48	39	39	89	108	80	12.7693	9.56487	10.0456	21.3965	25.7021	21.2429	7.42428e-09	1.47452	up
AT1G18570.1	233	219	207	58	65	54	61.9843	53.7104	53.3188	13.9438	15.4689	14.339	3.35144e-16	-1.52517	down
AT1G18590.1	253	313	327	64	56	59	67.3048	76.7642	84.2283	15.3863	13.327	15.6666	4.62851e-26	-1.94083	down
AT1G18620.1	41	52	24	94	91	90	10.9071	12.7532	6.18189	22.5986	21.6564	23.8983	5.19061e-08	1.57394	up
AT1G18660.2	18	11	19	55	38	43	4.78848	2.69778	4.894	13.2226	9.04334	11.4181	5.69443e-06	1.80017	up
AT1G18773.1	17	14	15	31	47	46	4.52246	3.43354	3.86368	7.45273	11.1852	12.2147	2.16205e-05	1.73909	up
AT1G18810.1	0	4	1	17	15	17	0	0.981012	0.257579	4.08698	3.56974	4.51411	1.88615e-05	3.19591	up
AT1G18980.1	43	40	34	13	6	12	11.4392	9.81012	8.75768	3.12534	1.4279	3.18643	0.00155086	-1.48731	down
AT1G19020.1	908	980	1013	214	231	205	241.552	240.348	260.927	51.4479	54.974	54.4349	1.57243e-73	-1.79237	down
AT1G19150.1	26	25	26	140	125	120	6.9167	6.13133	6.69705	33.6575	29.7478	31.8643	1.15706e-27	2.64849	up
AT1G19180.1	388	454	443	106	97	90	103.218	111.345	114.107	25.4835	23.0843	23.8983	4.46859e-36	-1.7632	down
AT1G19180.2	31	32	30	3	3	1	8.24683	7.8481	7.72736	0.721232	0.713948	0.265536	1.14576e-06	-3.07419	down
AT1G19190.1	25	27	21	3	3	5	6.65067	6.62183	5.40915	0.721232	0.713948	1.32768	0.000356766	-2.18189	down
AT1G19200.1	4	8	8	45	23	23	1.06411	1.96202	2.06063	10.8185	5.4736	6.10733	8.16379e-06	2.391	up
AT1G19250.1	17	14	36	2	5	3	4.52246	3.43354	9.27284	0.480821	1.18991	0.796608	0.00243025	-2.14716	down
AT1G19320.1	19	22	23	3	3	4	5.05451	5.39557	5.92431	0.721232	0.713948	1.06214	0.000842194	-2.12337	down
AT1G19330.1	84	103	80	32	34	26	22.3463	25.2611	20.6063	7.69314	8.09141	6.90394	4.15237e-05	-1.15706	down
AT1G19350.1	203	202	188	309	367	318	54.0035	49.5411	48.4248	74.2869	87.3396	84.4405	2.81662e-16	1.10385	up
AT1G19380.1	283	257	337	57	69	61	75.2856	63.03	86.8041	13.7034	16.4208	16.1977	7.85683e-21	-1.8541	down
AT1G19400.1	15	17	13	62	54	48	3.9904	4.1693	3.34852	14.9055	12.8511	12.7457	5.93792e-10	2.16922	up
AT1G19400.2	73	86	72	185	193	166	19.42	21.0918	18.5457	44.476	45.9306	44.079	4.37115e-20	1.58795	up
AT1G19510.1	25	20	14	1	0	1	6.65067	4.90506	3.6061	0.240411	0	0.265536	2.34964e-05	-3.62547	down
AT1G19530.1	121	141	182	1045	925	877	32.1892	34.5807	46.8793	251.229	220.134	232.875	1.05044e-123	3.03011	up
AT1G19610.1	191	177	196	708	600	525	50.8111	43.4098	50.4854	170.211	142.79	139.406	2.71467e-62	2.04986	up
AT1G19670.1	49	66	44	19	13	12	13.0353	16.1867	11.3335	4.5678	3.09377	3.18643	0.000303588	-1.44562	down
AT1G19740.1	165	202	193	357	387	324	43.8944	49.5411	49.7127	85.8266	92.0992	86.0337	3.17511e-24	1.28923	up
AT1G19900.1	23	35	24	11	1	5	6.11862	8.58386	6.18189	2.64452	0.237983	1.32768	0.00670595	-1.75616	down
AT1G19960.1	208	237	254	87	78	63	55.3336	58.125	65.425	20.9157	18.5626	16.7288	5.3762e-12	-1.24908	down
AT1G20020.1	312	359	358	1977	2099	1814	83.0004	88.0458	92.2132	475.292	499.525	481.683	0	2.87538	up
AT1G20140.1	145	112	116	54	52	31	38.5739	27.4683	29.8791	12.9822	12.3751	8.23162	7.16393e-05	-1.08006	down
AT1G20340.1	2254	2562	2192	11573	12226	10838	599.625	628.338	564.613	2782.27	2909.57	2877.88	0	2.66712	up
AT1G20440.1	435	469	499	1229	1199	1055	115.722	115.024	128.532	295.465	285.341	280.141	6.5391e-105	1.67002	up
AT1G20510.1	155	182	193	34	23	14	41.2342	44.636	49.7127	8.17396	5.4736	3.71751	1.90127e-20	-2.5061	down
AT1G20510.2	4	11	8	0	0	0	1.06411	2.69778	2.06063	0	0	0	0.00180629	-3.48266	down
AT1G20640.1	99	96	100	15	16	17	26.3367	23.5443	25.7579	3.60616	3.80772	4.51411	8.19901e-13	-2.21186	down
AT1G20650.1	61	51	42	131	128	134	16.2276	12.5079	10.8183	31.4938	30.4618	35.5818	3.16902e-14	1.69738	up
AT1G20823.1	50	67	62	16	6	14	13.3013	16.432	15.9699	3.84657	1.4279	3.71751	7.11542e-06	-1.87791	down
AT1G20830.1	25	35	25	53	65	50	6.65067	8.58386	6.43947	12.7418	15.4689	13.2768	3.79256e-05	1.32041	up
AT1G21010.1	83	117	135	35	41	40	22.0802	28.6946	34.7731	8.41437	9.75728	10.6214	6.94168e-05	-1.14483	down
AT1G21110.1	283	280	335	68	66	55	75.2856	68.6708	86.2889	16.3479	15.7068	14.6045	2.69637e-25	-1.87701	down
AT1G21120.1	321	365	364	35	39	22	85.3946	89.5173	93.7587	8.41437	9.28132	5.84179	3.04547e-52	-3.06499	down
AT1G21240.1	35	33	64	0	0	0	9.31094	8.09335	16.485	0	0	0	1.73051e-09	-5.58017	down
AT1G21250.1	368	410	452	40	23	21	97.8979	100.554	116.426	9.61642	5.4736	5.57626	4.27761e-57	-3.47764	down
AT1G21310.1	9108	8565	8733	3846	3239	2701	2422.97	2100.59	2249.44	924.619	770.825	717.213	1.22934e-34	-1.07682	down
AT1G21350.3	72	57	55	96	127	107	19.1539	13.9794	14.1668	23.0794	30.2238	28.4124	8.38515e-07	1.19042	up
AT1G21360.1	17	10	8	39	19	30	4.52246	2.45253	2.06063	9.37601	4.52167	7.96608	0.00200462	1.60262	up
AT1G21370.1	121	125	129	50	58	34	32.1892	30.6566	33.2277	12.0205	13.803	9.02823	2.11517e-05	-1.03362	down
AT1G21400.1	158	187	163	809	837	836	42.0322	45.8623	41.9853	194.492	199.191	221.988	6.57993e-129	2.64776	up
AT1G21410.1	22	23	29	74	66	56	5.85259	5.64082	7.46979	17.7904	15.7068	14.87	1.46608e-08	1.7295	up
AT1G21440.1	344	327	325	94	90	76	91.5132	80.1977	83.7131	22.5986	21.4184	20.1807	1.31843e-24	-1.57092	down
AT1G21500.1	382	395	373	1981	2043	1903	101.622	96.8749	96.0769	476.253	486.198	505.315	0	2.72565	up
AT1G21520.1	81	117	113	18	14	8	21.5482	28.6946	29.1064	4.32739	3.33176	2.12429	2.87278e-13	-2.53443	down
AT1G21600.1	114	121	118	273	283	231	30.3271	29.6756	30.3943	65.6321	67.3491	61.3388	1.03269e-25	1.50986	up
AT1G21680.1	122	145	137	829	885	810	32.4553	35.5617	35.2883	199.3	210.615	215.084	2.15912e-165	2.99916	up
AT1G21750.1	1415	1601	1649	630	550	544	376.428	392.65	424.747	151.459	130.89	144.452	6.38044e-39	-1.07256	down
AT1G21830.1	45	37	39	118	115	107	11.9712	9.07436	10.0456	28.3685	27.368	28.4124	1.2543e-15	1.83037	up
AT1G21890.1	6	11	7	1	0	0	1.59616	2.69778	1.80305	0.240411	0	0	0.00534497	-2.91024	down
AT1G22070.1	316	295	374	73	73	64	84.0645	72.3496	96.3345	17.55	17.3727	16.9943	8.03996e-25	-1.85851	down
AT1G22160.1	262	297	328	16	24	13	69.699	72.8401	84.4858	3.84657	5.71158	3.45197	6.89661e-47	-3.6524	down
AT1G22180.2	146	171	189	41	46	34	38.8399	41.9383	48.6824	9.85684	10.9472	9.02823	9.12749e-14	-1.686	down
AT1G22220.1	105	138	157	7	14	15	27.9328	33.8449	40.4399	1.68287	3.33176	3.98304	2.45847e-18	-3.02384	down
AT1G22370.1	6	9	4	55	47	45	1.59616	2.20728	1.03032	13.2226	11.1852	11.9491	8.86814e-13	3.17279	up
AT1G22410.1	1286	1467	1491	359	288	303	342.111	359.786	384.05	86.3074	68.539	80.4574	1.27577e-77	-1.79356	down
AT1G22430.1	41	53	49	98	101	85	10.9071	12.9984	12.6214	23.5602	24.0362	22.5706	1.05684e-08	1.33705	up
AT1G22440.1	92	107	79	38	42	24	24.4745	26.2421	20.3487	9.1356	9.99527	6.37287	0.000380416	-1.04404	down
AT1G22470.1	55	63	58	16	16	14	14.6315	15.4509	14.9396	3.84657	3.80772	3.71751	1.91203e-05	-1.53419	down
AT1G22500.1	106	100	113	289	303	262	28.1988	24.5253	29.1064	69.4787	72.1087	69.5705	1.21347e-33	1.77255	up
AT1G22590.1	9	10	5	29	37	36	2.39424	2.45253	1.28789	6.97191	8.80535	9.5593	6.1032e-07	2.34457	up
AT1G22630.1	112	123	107	431	475	360	29.795	30.1661	27.5609	103.617	113.042	95.593	5.46195e-59	2.23819	up
AT1G22690.1	143	200	180	382	339	298	38.0418	49.0506	46.3642	91.8369	80.6761	79.1298	4.02222e-20	1.31818	up
AT1G22740.1	57	59	51	159	180	129	15.1635	14.4699	13.1365	38.2253	42.8369	34.2542	2.54162e-19	1.82877	up
AT1G22850.1	130	137	149	399	410	323	34.5835	33.5997	38.3792	95.9238	97.5728	85.7682	6.17758e-41	1.7955	up
AT1G22890.1	143	151	128	244	261	258	38.0418	37.0332	32.9701	58.6602	62.1134	68.5083	4.36679e-16	1.21413	up
AT1G23040.1	691	671	694	241	236	190	183.825	164.565	178.76	57.939	56.1639	50.4519	2.30939e-31	-1.26295	down
AT1G23050.1	11	20	17	56	51	55	2.9263	4.90506	4.37884	13.463	12.1371	14.6045	7.5482e-09	2.06718	up
AT1G23110.1	0	2	0	14	8	9	0	0.490506	0	3.36575	1.90386	2.38983	0.000208945	3.37626	up
AT1G23170.2	32	32	41	10	8	13	8.51286	7.8481	10.5607	2.40411	1.90386	3.45197	0.00533578	-1.33491	down
AT1G23310.1	436	488	477	2444	2529	2238	115.988	119.683	122.865	587.564	601.858	594.27	0	2.72328	up
AT1G23390.1	310	322	338	1921	1917	1797	82.4683	78.9715	87.0616	461.829	456.213	477.168	0	2.89728	up
AT1G23400.1	60	70	66	186	143	159	15.9616	17.1677	17.0002	44.7164	34.0315	42.2202	2.7522e-17	1.6656	up
AT1G23410.1	112	102	98	31	24	17	29.795	25.0158	25.2427	7.45273	5.71158	4.51411	2.52659e-09	-1.73095	down
AT1G23720.1	148	151	112	14	25	20	39.372	37.0332	28.8488	3.36575	5.94956	5.31072	9.13818e-16	-2.3896	down
AT1G23740.1	57	69	69	222	206	150	15.1635	16.9225	17.7729	53.3712	49.0244	39.8304	1.43854e-22	1.90801	up
AT1G23800.1	95	98	102	22	26	29	25.2726	24.0348	26.273	5.28903	6.18755	7.70055	4.49814e-08	-1.54692	down
AT1G23870.1	18	19	16	140	148	134	4.78848	4.65981	4.12126	33.6575	35.2214	35.5818	3.53059e-36	3.30498	up
AT1G24020.1	807	870	770	218	182	149	214.684	213.37	198.336	52.4095	43.3128	39.5649	3.15791e-55	-1.79257	down
AT1G24140.1	16	28	44	4	3	2	4.25643	6.86708	11.3335	0.961642	0.713948	0.531072	7.11301e-05	-2.65257	down
AT1G24145.1	28	41	39	2	1	1	7.44875	10.0554	10.0456	0.480821	0.237983	0.265536	3.1318e-08	-3.86146	down
AT1G24160.2	166	209	159	284	300	262	44.1605	51.2579	40.955	68.2766	71.3948	69.5705	4.51823e-13	1.02378	up
AT1G24340.1	64	66	48	104	134	113	17.0257	16.1867	12.3638	25.0027	31.8897	30.0056	9.76395e-09	1.32956	up
AT1G24430.1	14	19	19	2	3	0	3.72438	4.65981	4.894	0.480821	0.713948	0	0.000621815	-2.6324	down
AT1G24577.1	20	21	22	41	36	37	5.32054	5.15031	5.66673	9.85684	8.56737	9.82484	0.00140011	1.18694	up
AT1G24610.1	37	32	28	81	82	73	9.84299	7.8481	7.21221	19.4733	19.5146	19.3841	1.92984e-09	1.61877	up
AT1G24625.1	57	53	46	20	17	7	15.1635	12.9984	11.8486	4.80821	4.0457	1.85875	0.000745703	-1.42823	down
AT1G25220.1	49	156	128	0	0	0	13.0353	38.2595	32.9701	0	0	0	2.0117e-14	-6.63964	down
AT1G25220.2	569	575	619	168	155	155	151.369	141.02	159.441	40.389	36.8873	41.1581	1.35173e-36	-1.51695	down
AT1G25230.1	248	249	190	548	610	507	65.9747	61.068	48.94	131.745	145.169	134.627	5.15411e-38	1.63308	up
AT1G25240.1	10	5	6	0	0	0	2.66027	1.22627	1.54547	0	0	0	0.00244503	-3.40528	down
AT1G25275.3	258	100	198	780	638	548	68.6349	24.5253	51.0006	187.52	151.833	145.514	1.52983e-06	2.08036	up
AT1G25390.1	125	132	114	27	15	22	33.2534	32.3734	29.364	6.49109	3.56974	5.84179	4.84182e-14	-2.1357	down
AT1G25440.1	78	76	69	295	247	283	20.7501	18.6392	17.7729	70.9211	58.7817	75.1467	5.57812e-39	2.23761	up
AT1G25510.1	42	47	37	4	4	7	11.1731	11.5269	9.53042	0.961642	0.95193	1.85875	5.25198e-07	-2.55293	down
AT1G25520.1	210	250	205	73	77	61	55.8656	61.3133	52.8037	17.55	18.3247	16.1977	8.29004e-13	-1.28545	down
AT1G25530.1	124	134	155	34	28	20	32.9873	32.8639	39.9247	8.17396	6.66351	5.31072	1.44076e-13	-1.94782	down
AT1G25550.1	7	16	3	151	134	124	1.86219	3.92405	0.772736	36.302	31.8897	32.9265	1.20653e-33	4.22177	up
AT1G25560.1	327	362	335	1017	1099	1046	86.9908	88.7816	86.2889	244.498	261.543	277.751	1.64049e-110	1.98813	up
AT1G26200.1	27	33	31	0	0	0	7.18273	8.09335	7.98494	0	0	0	4.68881e-08	-5.18535	down
AT1G26230.1	10	0	2	23	23	13	2.66027	0	0.515158	5.52944	5.4736	3.45197	0.00287856	2.30291	up
AT1G26380.1	85	88	111	19	17	15	22.6123	21.5823	28.5912	4.5678	4.0457	3.98304	9.71793e-11	-2.0735	down
AT1G26410.1	46	39	51	6	11	6	12.2372	9.56487	13.1365	1.44246	2.61781	1.59322	6.50371e-06	-2.11002	down
AT1G26420.1	123	135	144	20	16	18	32.7213	33.1092	37.0913	4.80821	3.80772	4.77965	5.38226e-19	-2.49165	down
AT1G26690.1	241	237	238	85	74	97	64.1125	58.125	61.3038	20.4349	17.6107	25.757	1.58446e-09	-1.11011	down
AT1G26730.1	13	8	13	2	0	0	3.45835	1.96202	3.34852	0.480821	0	0	0.00214977	-2.90021	down
AT1G26761.1	22	10	19	38	40	27	5.85259	2.45253	4.894	9.1356	9.5193	7.16948	0.00282796	1.33774	up
AT1G26770.1	77	95	104	34	35	30	20.4841	23.299	26.7882	8.17396	8.32939	7.96608	8.79444e-05	-1.10064	down
AT1G26800.1	87	78	60	163	158	159	23.1443	19.1297	15.4547	39.1869	37.6012	42.2202	3.98567e-13	1.44436	up
AT1G26900.1	14	15	21	2	2	2	3.72438	3.6788	5.40915	0.480821	0.475965	0.531072	0.00131908	-2.38404	down
AT1G26920.1	157	163	137	336	346	282	41.7662	39.9762	35.2883	80.778	82.342	74.8812	1.92048e-26	1.43128	up
AT1G27030.1	306	331	323	72	62	72	81.4042	81.1787	83.198	17.3096	14.7549	19.1186	9.50253e-30	-1.84602	down
AT1G27140.1	28	44	33	2	1	0	7.44875	10.7911	8.5001	0.480821	0.237983	0	3.87916e-08	-4.08178	down
AT1G27290.1	389	367	386	638	641	609	103.484	90.0079	99.4254	153.382	152.547	161.711	5.08536e-30	1.08483	up
AT1G27330.1	643	630	737	216	183	172	171.055	154.509	189.836	51.9287	43.5508	45.6722	3.88842e-30	-1.4524	down
AT1G27450.1	190	220	243	62	49	58	50.5451	53.9557	62.5916	14.9055	11.6611	15.4011	7.5326e-15	-1.57288	down
AT1G27460.1	32	37	21	55	69	61	8.51286	9.07436	5.40915	13.2226	16.4208	16.1977	2.11942e-05	1.37806	up
AT1G27480.1	26	31	27	103	115	85	6.9167	7.60284	6.95463	24.7623	27.368	22.5706	3.85176e-17	2.17913	up
AT1G27670.1	79	86	98	150	147	158	21.0161	21.0918	25.2427	36.0616	34.9834	41.9547	2.06058e-09	1.1474	up
AT1G27730.1	633	647	841	183	197	168	168.395	158.679	216.624	43.9951	46.8826	44.6101	1.25145e-26	-1.58588	down
AT1G27740.1	33	56	43	3	5	2	8.77889	13.7342	11.0759	0.721232	1.18991	0.531072	3.50523e-08	-3.12034	down
AT1G28090.1	11	12	17	28	36	26	2.9263	2.94304	4.37884	6.7315	8.56737	6.90394	0.000995546	1.47144	up
AT1G28100.4	12	11	0	36	42	38	3.19232	2.69778	0	8.65478	9.99527	10.0904	2.22851e-05	2.50727	up
AT1G28150.1	340	343	351	551	578	486	90.4491	84.1218	90.4102	132.466	137.554	129.051	1.43998e-24	1.00131	up
AT1G28170.1	12	12	9	0	0	0	3.19232	2.94304	2.31821	0	0	0	0.00019557	-3.95408	down
AT1G28230.1	110	136	114	16	23	12	29.263	33.3544	29.364	3.84657	5.4736	3.18643	1.03776e-15	-2.41166	down
AT1G28260.1	17	11	15	26	31	24	4.52246	2.69778	3.86368	6.25068	7.37746	6.37287	0.00773404	1.22194	up
AT1G28290.1	697	750	663	287	211	180	185.421	183.94	170.775	68.9978	50.2143	47.7965	5.84779e-21	-1.27672	down
AT1G28330.1	99	92	87	490	497	515	26.3367	22.5633	22.4094	117.801	118.277	136.751	6.11421e-86	2.7864	up
AT1G28330.2	154	157	136	671	663	617	40.9681	38.5047	35.0307	161.316	157.782	163.836	1.55994e-113	2.48161	up
AT1G28330.3	1	1	0	10	5	10	0.266027	0.245253	0	2.40411	1.18991	2.65536	0.000971652	3.1005	up
AT1G28370.1	152	160	196	13	12	8	40.4361	39.2405	50.4854	3.12534	2.85579	2.12429	4.05758e-28	-3.50625	down
AT1G28390.1	37	50	46	17	11	13	9.84299	12.2627	11.8486	4.08698	2.61781	3.45197	0.00199225	-1.29111	down
AT1G28400.1	224	247	256	87	88	80	59.59	60.5775	65.9402	20.9157	20.9425	21.2429	4.95753e-12	-1.1432	down
AT1G28480.1	37	18	38	7	1	3	9.84299	4.41455	9.78799	1.68287	0.237983	0.796608	0.000170909	-2.48518	down
AT1G28570.1	68	56	50	23	20	23	18.0898	13.7342	12.8789	5.52944	4.75965	6.10733	0.00519807	-1.01256	down
AT1G28680.1	420	489	492	94	96	90	111.731	119.929	126.729	22.5986	22.8463	23.8983	4.02503e-43	-1.95141	down
AT1G28815.1	18	28	17	3	4	4	4.78848	6.86708	4.37884	0.721232	0.95193	1.06214	0.00218119	-1.97142	down
AT1G29000.1	10	13	10	2	0	1	2.66027	3.18829	2.57579	0.480821	0	0.265536	0.00479703	-2.52873	down
AT1G29025.1	296	343	301	49	33	34	78.7439	84.1218	77.5312	11.7801	7.85342	9.02823	4.17336e-42	-2.63534	down
AT1G29050.1	181	213	207	50	54	46	48.1509	52.2389	53.3188	12.0205	12.8511	12.2147	6.81734e-17	-1.62694	down
AT1G29070.1	1083	1166	1036	3649	3829	3405	288.107	285.965	266.852	877.258	911.235	904.15	4.21739e-305	2.08927	up
AT1G29090.1	121	160	125	265	241	192	32.1892	39.2405	32.1974	63.7088	57.3538	50.9829	4.91716e-12	1.13539	up
AT1G29270.1	17	33	27	2	6	4	4.52246	8.09335	6.95463	0.480821	1.4279	1.06214	0.000700796	-2.12724	down
AT1G29290.1	67	66	84	15	10	10	17.8238	16.1867	21.6366	3.60616	2.37983	2.65536	4.3146e-09	-2.2084	down
AT1G29430.1	15	17	8	28	39	29	3.9904	4.1693	2.06063	6.7315	9.28132	7.70055	0.000598809	1.56337	up
AT1G29460.1	2	7	0	22	22	24	0.532054	1.71677	0	5.28903	5.23562	6.37287	7.87266e-06	2.97707	up
AT1G29500.1	14	16	11	32	31	27	3.72438	3.92405	2.83337	7.69314	7.37746	7.16948	0.000791058	1.44413	up
AT1G29700.1	31	30	32	66	55	52	8.24683	7.35759	8.24252	15.8671	13.089	13.8079	4.49617e-05	1.23254	up
AT1G29750.2	42	44	40	10	17	11	11.1731	10.7911	10.3032	2.40411	4.0457	2.9209	0.00206437	-1.32153	down
AT1G29860.1	34	43	53	3	0	1	9.04491	10.5459	13.6517	0.721232	0	0.265536	2.72979e-09	-4.10408	down
AT1G29910.1	505	575	497	3321	3878	3276	134.344	141.02	128.017	798.404	922.896	869.896	0	3.09099	up
AT1G29920.1	287	353	285	3218	3654	2805	76.3497	86.5743	73.41	773.641	869.588	744.829	0	3.74103	up
AT1G29930.1	6652	6559	5366	45745	52373	43604	1769.61	1608.61	1382.17	10997.6	12463.9	11578.4	8.67878e-289	3.28708	up
AT1G29980.1	54	53	58	16	12	7	14.3655	12.9984	14.9396	3.84657	2.85579	1.85875	6.76236e-06	-1.82314	down
AT1G30040.1	30	44	37	5	6	8	7.98081	10.7911	9.53042	1.20205	1.4279	2.12429	4.17228e-05	-2.06367	down
AT1G30080.1	18	14	17	1	1	0	4.78848	3.43354	4.37884	0.240411	0.237983	0	9.48763e-05	-3.40609	down
AT1G30110.1	436	473	474	133	156	148	115.988	116.005	122.092	31.9746	37.1253	39.2993	1.42807e-22	-1.29305	down
AT1G30260.1	31	34	37	93	77	73	8.24683	8.3386	9.53042	22.3582	18.3247	19.3841	1.9884e-09	1.58911	up
AT1G30360.1	164	148	146	403	463	355	43.6284	36.2974	37.6065	96.8855	110.186	94.2653	7.66272e-38	1.76569	up
AT1G30370.1	12	14	18	1	4	0	3.19232	3.43354	4.63642	0.240411	0.95193	0	0.00354838	-2.38799	down
AT1G30380.1	1860	2021	1862	8717	9939	8750	494.81	495.656	479.612	2095.66	2365.31	2323.44	0	2.61621	up
AT1G30550.2	19	30	22	6	0	2	5.05451	7.35759	5.66673	1.44246	0	0.531072	0.000429564	-2.49353	down
AT1G30700.1	163	189	240	39	26	36	43.3624	46.3528	61.8189	9.37601	6.18755	9.5593	4.30255e-17	-2.15726	down
AT1G30757.1	79	75	71	20	20	17	21.0161	18.394	18.2881	4.80821	4.75965	4.51411	7.0889e-07	-1.58811	down
AT1G30820.1	52	60	36	136	121	103	13.8334	14.7152	9.27284	32.6958	28.7959	27.3502	7.50146e-12	1.62397	up
AT1G30840.1	61	89	71	12	16	24	16.2276	21.8275	18.2881	2.88493	3.80772	6.37287	9.98673e-06	-1.66116	down
AT1G30850.1	22	13	18	0	2	1	5.85259	3.18829	4.63642	0	0.475965	0.265536	0.000147838	-3.14974	down
AT1G30870.1	238	282	339	22	28	25	63.3144	69.1613	87.3192	5.28903	6.66351	6.6384	1.94034e-37	-3.11374	down
AT1G30900.1	82	103	106	8	5	7	21.8142	25.2611	27.3034	1.92328	1.18991	1.85875	3.1392e-17	-3.37567	down
AT1G31190.1	51	55	45	102	98	85	13.5674	13.4889	11.591	24.5219	23.3223	22.5706	3.89363e-08	1.26376	up
AT1G31320.1	26	31	36	8	2	2	6.9167	7.60284	9.27284	1.92328	0.475965	0.531072	6.77854e-05	-2.40605	down
AT1G31330.1	2183	2285	2025	12675	12975	12081	580.737	560.403	521.597	3047.2	3087.82	3207.94	0	2.90044	up
AT1G31540.1	17	10	7	2	0	1	4.52246	2.45253	1.80305	0.480821	0	0.265536	0.00574939	-2.53816	down
AT1G31770.1	200	230	228	59	68	55	53.2054	56.4082	58.728	14.1842	16.1828	14.6045	7.71142e-16	-1.48171	down
AT1G31800.1	80	97	98	164	156	128	21.2821	23.7895	25.2427	39.4273	37.1253	33.9886	9.72363e-09	1.05648	up
AT1G31885.1	51	35	64	11	15	8	13.5674	8.58386	16.485	2.64452	3.56974	2.12429	0.000191977	-1.71846	down
AT1G31920.1	18	13	10	38	21	29	4.78848	3.18829	2.57579	9.1356	4.99763	7.70055	0.00377195	1.39843	up
AT1G32060.1	269	275	259	1759	1803	1570	71.5612	67.4446	66.7129	422.882	429.083	416.892	0	3.03322	up
AT1G32080.1	42	54	57	256	245	232	11.1731	13.2437	14.682	61.5451	58.3057	61.6044	8.82448e-48	2.60476	up
AT1G32170.1	47	38	37	69	73	69	12.5033	9.31961	9.53042	16.5883	17.3727	18.322	3.81144e-05	1.13495	up
AT1G32200.2	21	17	15	44	48	33	5.58656	4.1693	3.86368	10.5781	11.4232	8.76269	5.14837e-05	1.54777	up
AT1G32220.1	55	39	50	113	88	96	14.6315	9.56487	12.8789	27.1664	20.9425	25.4915	5.15103e-08	1.38437	up
AT1G32470.1	314	358	310	1494	1704	1394	83.5324	87.8006	79.8494	359.173	405.522	370.157	1.46796e-191	2.58313	up
AT1G32520.1	17	22	26	42	47	44	4.52246	5.39557	6.69705	10.0972	11.1852	11.6836	0.000156292	1.36299	up
AT1G32540.1	7	8	8	42	35	38	1.86219	1.96202	2.06063	10.0972	8.32939	10.0904	6.08588e-09	2.57452	up
AT1G32540.2	15	21	20	95	111	91	3.9904	5.15031	5.15158	22.839	26.4161	24.1638	2.37568e-21	2.72093	up
AT1G32550.1	91	93	64	187	222	176	24.2084	22.8085	16.485	44.9568	52.8321	46.7344	2.48233e-16	1.58744	up
AT1G32920.1	339	332	343	529	593	497	90.1831	81.424	88.3495	127.177	141.124	131.971	4.05164e-23	1.03325	up
AT1G32928.1	132	126	165	408	417	419	35.1155	30.9019	42.5005	98.0875	99.2387	111.26	1.79648e-38	1.91034	up
AT1G32940.1	82	85	80	34	22	11	21.8142	20.8465	20.6063	8.17396	5.23562	2.9209	3.1652e-05	-1.49656	down
AT1G32990.1	288	320	326	834	822	718	76.6157	78.481	83.9707	200.502	195.622	190.655	7.14378e-83	1.70369	up
AT1G33030.1	145	139	118	22	20	13	38.5739	34.0902	30.3943	5.28903	4.75965	3.45197	7.45343e-18	-2.46875	down
AT1G33060.1	52	75	40	0	0	0	13.8334	18.394	10.3032	0	0	0	6.78366e-11	-5.88985	down
AT1G33170.1	49	57	51	19	16	14	13.0353	13.9794	13.1365	4.5678	3.80772	3.71751	0.000543577	-1.28503	down
AT1G33260.1	44	52	43	0	7	7	11.7052	12.7532	11.0759	0	1.66588	1.85875	8.26972e-07	-2.74096	down
AT1G33560.1	83	96	95	46	36	18	22.0802	23.5443	24.47	11.0589	8.56737	4.77965	0.00090647	-1.0833	down
AT1G33750.1	27	44	48	7	4	0	7.18273	10.7911	12.3638	1.68287	0.95193	0	3.69401e-06	-2.83851	down
AT1G33800.1	270	373	330	40	31	23	71.8273	91.4794	85.001	9.61642	7.37746	6.10733	4.58808e-42	-2.97906	down
AT1G33810.1	195	193	166	306	317	270	51.8752	47.3338	42.7581	73.5657	75.4405	71.6948	4.18848e-15	1.04554	up
AT1G33811.1	173	190	156	284	279	249	46.0226	46.5981	40.1823	68.2766	66.3971	66.1185	1.03425e-13	1.00395	up
AT1G33960.1	18	19	27	4	5	3	4.78848	4.65981	6.95463	0.961642	1.18991	0.796608	0.00261356	-1.8986	down
AT1G34000.1	293	317	292	900	894	818	77.9459	77.7452	75.213	216.37	212.756	217.209	3.12265e-113	1.89321	up
AT1G34040.1	67	73	99	5	6	5	17.8238	17.9035	25.5003	1.20205	1.4279	1.32768	8.43322e-14	-3.38002	down
AT1G34047.1	14	10	16	0	0	0	3.72438	2.45253	4.12126	0	0	0	6.01466e-05	-4.17478	down
AT1G34060.1	114	121	170	4	4	3	30.3271	29.6756	43.7884	0.961642	0.95193	0.796608	1.09927e-22	-4.59426	down
AT1G34350.1	71	171	159	0	0	0	18.8879	41.9383	40.955	0	0	0	3.22136e-16	-6.92174	down
AT1G34510.1	80	75	99	9	6	3	21.2821	18.394	25.5003	2.1637	1.4279	0.796608	2.15206e-14	-3.32223	down
AT1G34540.1	9	21	9	2	0	0	2.39424	5.15031	2.31821	0.480821	0	0	0.00132299	-3.02726	down
AT1G34670.1	8	9	11	0	0	2	2.12821	2.20728	2.83337	0	0	0.531072	0.00683759	-2.63109	down
AT1G34750.1	159	221	206	52	36	38	42.2983	54.2009	53.0612	12.5014	8.56737	10.0904	8.18774e-16	-1.83416	down
AT1G34760.1	8	7	7	22	14	23	2.12821	1.71677	1.80305	5.28903	3.33176	6.10733	0.00255914	1.68485	up
AT1G34760.2	21	7	15	31	32	34	5.58656	1.71677	3.86368	7.45273	7.61544	9.02823	0.00265007	1.46212	up
AT1G35140.1	21	25	28	59	50	35	5.58656	6.13133	7.21221	14.1842	11.8991	9.29376	0.000323115	1.28275	up
AT1G35210.1	159	156	200	16	12	14	42.2983	38.2595	51.5158	3.84657	2.85579	3.71751	1.42033e-26	-3.19264	down
AT1G35230.1	41	48	75	2	3	2	10.9071	11.7721	19.3184	0.480821	0.713948	0.531072	2.32759e-10	-3.83102	down
AT1G35250.1	31	27	31	1	0	1	8.24683	6.62183	7.98494	0.240411	0	0.265536	1.57245e-07	-4.19578	down
AT1G35290.1	30	53	56	4	5	8	7.98081	12.9984	14.4244	0.961642	1.18991	2.12429	1.6277e-06	-2.5043	down
AT1G35310.1	77	103	110	2	3	4	20.4841	25.2611	28.3337	0.480821	0.713948	1.06214	7.54875e-18	-4.36203	down
AT1G35320.1	118	114	130	34	46	30	31.3912	27.9588	33.4852	8.17396	10.9472	7.96608	1.47908e-07	-1.34315	down
AT1G35340.1	30	56	40	67	112	51	7.98081	13.7342	10.3032	16.1075	26.654	13.5423	0.0011615	1.19686	up
AT1G35340.4	39	42	29	85	71	85	10.375	10.3006	7.46979	20.4349	16.8968	22.5706	1.03228e-07	1.47548	up
AT1G35420.2	108	77	66	255	273	202	28.7309	18.8845	17.0002	61.3047	64.9692	53.6383	9.7314e-20	1.87692	up
AT1G35516.1	34	29	39	84	104	76	9.04491	7.11234	10.0456	20.1945	24.7502	20.1807	3.63687e-10	1.70311	up
AT1G35680.1	290	290	248	748	795	696	77.1478	71.1234	63.8795	179.827	189.196	184.813	7.07389e-74	1.79314	up
AT1G35720.1	806	863	860	271	315	256	214.418	211.653	221.518	65.1513	74.9645	67.9772	8.14829e-36	-1.22288	down
AT1G35910.1	13	17	17	0	3	0	3.45835	4.1693	4.37884	0	0.713948	0	0.000486389	-2.98004	down
AT1G36070.1	78	86	69	34	30	23	20.7501	21.0918	17.7729	8.17396	7.13948	6.10733	0.000528006	-1.0444	down
AT1G36622.1	72	69	112	22	16	14	19.1539	16.9225	28.8488	5.28903	3.80772	3.71751	3.66701e-07	-1.87601	down
AT1G37130.1	1308	1498	1322	4836	5122	4706	347.963	367.389	340.519	1162.63	1218.95	1249.61	0	2.19169	up
AT1G41830.1	177	181	154	37	41	43	47.0868	44.3908	39.6671	8.89519	9.75728	11.4181	9.54726e-15	-1.69912	down
AT1G42550.1	60	102	69	252	220	206	15.9616	25.0158	17.7729	60.5835	52.3562	54.7004	8.62803e-23	1.90369	up
AT1G42970.1	361	427	374	1886	1966	1651	96.0357	104.723	96.3345	453.414	467.874	438.4	2.43282e-275	2.602	up
AT1G43020.1	26	19	26	0	5	0	6.9167	4.65981	6.69705	0	1.18991	0	9.67055e-05	-3.00736	down
AT1G43245.1	25	29	29	48	48	49	6.65067	7.11234	7.46979	11.5397	11.4232	13.0113	0.000466539	1.14636	up
AT1G43560.1	231	287	234	515	486	442	61.4522	70.3876	60.2734	123.811	115.66	117.367	6.09669e-32	1.29975	up
AT1G43620.1	62	46	59	11	20	25	16.4937	11.2816	15.1971	2.64452	4.75965	6.6384	0.00669144	-1.16633	down
AT1G43670.1	121	148	145	648	677	545	32.1892	36.2974	37.3489	155.786	161.114	144.717	4.60687e-100	2.52769	up
AT1G43800.1	78	185	255	8	12	11	20.7501	45.3718	65.6826	1.92328	2.85579	2.9209	2.03755e-15	-3.53113	down
AT1G43910.1	228	253	255	5	11	10	60.6541	62.049	65.6826	1.20205	2.61781	2.65536	3.51049e-43	-4.35857	down
AT1G44000.1	96	112	95	185	199	141	25.5386	27.4683	24.47	44.476	47.3585	37.4406	1.97742e-10	1.1439	up
AT1G44010.1	11	11	8	0	0	0	2.9263	2.69778	2.06063	0	0	0	0.000349059	-3.83995	down
AT1G44130.1	17	17	23	5	2	2	4.52246	4.1693	5.92431	1.20205	0.475965	0.531072	0.00223387	-2.0924	down
AT1G44160.1	67	76	76	25	23	25	17.8238	18.6392	19.576	6.01027	5.4736	6.6384	0.000105626	-1.19872	down
AT1G44170.1	12	13	6	0	0	0	3.19232	3.18829	1.54547	0	0	0	0.000349587	-3.84608	down
AT1G44350.1	21	16	23	50	68	48	5.58656	3.92405	5.92431	12.0205	16.1828	12.7457	4.07029e-07	1.77976	up
AT1G44575.1	490	566	528	1406	1406	1119	130.353	138.813	136.002	338.017	334.603	297.135	4.94951e-98	1.66819	up
AT1G44800.1	828	923	822	197	150	152	220.27	226.369	211.73	47.3609	35.6974	40.3615	2.4323e-70	-1.99935	down
AT1G44920.1	97	116	99	287	259	261	25.8046	28.4493	25.5003	68.9978	61.6375	69.3049	5.11629e-31	1.7267	up
AT1G44970.1	54	105	80	23	17	21	14.3655	25.7516	20.6063	5.52944	4.0457	5.57626	2.04291e-05	-1.55672	down
AT1G45010.1	86	93	98	16	15	14	22.8783	22.8085	25.2427	3.84657	3.56974	3.71751	3.49272e-12	-2.21278	down
AT1G45015.1	88	68	110	28	19	20	23.4104	16.6772	28.3337	6.7315	4.52167	5.31072	3.47638e-06	-1.59725	down
AT1G45163.1	38	39	36	106	95	87	10.109	9.56487	9.27284	25.4835	22.6083	23.1016	2.21702e-12	1.68955	up
AT1G45201.1	382	395	352	136	161	139	101.622	96.8749	90.6677	32.6958	38.3152	36.9095	3.51969e-13	-1.00594	down
AT1G45230.1	64	49	58	142	122	105	17.0257	12.0174	14.9396	34.1383	29.0339	27.8813	7.47044e-11	1.44977	up
AT1G45474.1	90	92	96	301	295	248	23.9424	22.5633	24.7276	72.3636	70.2048	65.853	2.57036e-39	1.95202	up
AT1G45474.2	105	130	114	254	248	212	27.9328	31.8829	29.364	61.0643	59.0197	56.2937	1.61406e-20	1.38765	up
AT1G46768.1	21	23	13	82	58	54	5.58656	5.64082	3.34852	19.7137	13.803	14.339	2.3445e-09	2.07254	up
AT1G47270.1	31	27	31	71	39	45	8.24683	6.62183	7.98494	17.0692	9.28132	11.9491	0.00201833	1.12705	up
AT1G47480.1	94	98	109	18	22	17	25.0065	24.0348	28.0761	4.32739	5.23562	4.51411	1.79339e-11	-2.00283	down
AT1G47510.1	14	12	17	1	0	1	3.72438	2.94304	4.37884	0.240411	0	0.265536	0.000303372	-3.22371	down
AT1G47580.1	18	26	11	77	107	82	4.78848	6.37658	2.83337	18.5116	25.4641	21.774	9.24408e-15	2.57905	up
AT1G47600.1	158	186	170	35	37	34	42.0322	45.6171	43.7884	8.41437	8.80535	9.02823	3.66652e-18	-1.89499	down
AT1G47740.2	25	19	32	0	6	2	6.65067	4.65981	8.24252	0	1.4279	0.531072	0.000281483	-2.58061	down
AT1G47840.1	122	113	109	25	19	15	32.4553	27.7136	28.0761	6.01027	4.52167	3.98304	1.0528e-13	-2.14895	down
AT1G48300.1	17	11	16	28	45	23	4.52246	2.69778	4.12126	6.7315	10.7092	6.10733	0.00260174	1.41521	up
AT1G48320.1	231	223	257	93	87	77	61.4522	54.6914	66.1978	22.3582	20.7045	20.4463	2.12098e-10	-1.10263	down
AT1G48350.1	778	858	786	1859	2056	1740	206.969	210.427	202.457	446.923	489.292	462.033	5.68279e-121	1.58394	up
AT1G48500.2	45	38	24	5	6	9	11.9712	9.31961	6.18189	1.20205	1.4279	2.38983	0.000326432	-1.9328	down
AT1G48510.1	9	13	12	1	0	1	2.39424	3.18829	3.09095	0.240411	0	0.265536	0.00167345	-2.91335	down
AT1G48520.2	129	87	97	255	185	228	34.3175	21.337	24.9851	61.3047	44.0268	60.5422	3.18632e-11	1.4389	up
AT1G48570.1	22	34	29	78	56	40	5.85259	8.3386	7.46979	18.752	13.327	10.6214	0.000132198	1.35456	up
AT1G48600.1	408	486	479	165	143	124	108.539	119.193	123.38	39.6678	34.0315	32.9265	4.10083e-22	-1.30292	down
AT1G48930.1	85	92	106	8	8	5	22.6123	22.5633	27.3034	1.92328	1.90386	1.32768	1.19733e-16	-3.27745	down
AT1G49000.1	54	60	64	7	9	8	14.3655	14.7152	16.485	1.68287	2.14184	2.12429	5.01115e-09	-2.43586	down
AT1G49010.1	11	18	4	34	35	32	2.9263	4.41455	1.03032	8.17396	8.32939	8.49716	0.000143986	1.88873	up
AT1G49032.1	361	411	372	691	745	656	96.0357	100.799	95.8193	166.124	177.297	174.192	5.6174e-43	1.23169	up
AT1G49050.2	119	114	112	46	32	30	31.6572	27.9588	28.8488	11.0589	7.61544	7.96608	3.83051e-07	-1.30134	down
AT1G49130.2	4	8	5	80	89	72	1.06411	1.96202	1.28789	19.2328	21.1804	19.1186	1.45411e-22	4.02759	up
AT1G49200.1	5	8	1	31	32	21	1.33013	1.96202	0.257579	7.45273	7.61544	5.57626	1.76727e-06	2.74009	up
AT1G49230.1	34	28	29	12	7	3	9.04491	6.86708	7.46979	2.88493	1.66588	0.796608	0.00345859	-1.60727	down
AT1G49380.1	23	20	9	43	58	37	6.11862	4.90506	2.31821	10.3377	13.803	9.82484	5.67757e-05	1.70408	up
AT1G49475.1	13	18	15	2	4	1	3.45835	4.41455	3.86368	0.480821	0.95193	0.265536	0.00497644	-2.0936	down
AT1G49500.1	49	28	13	2203	2382	2178	13.0353	6.86708	3.34852	529.625	566.874	578.338	1.67989e-41	6.26276	up
AT1G49510.1	71	88	72	118	128	119	18.8879	21.5823	18.5457	28.3685	30.4618	31.5988	4.18125e-07	1.01711	up
AT1G49570.1	60	57	55	16	12	9	15.9616	13.9794	14.1668	3.84657	2.85579	2.38983	3.04358e-06	-1.8056	down
AT1G49650.1	33	37	22	57	60	70	8.77889	9.07436	5.66673	13.7034	14.279	18.5875	2.73445e-05	1.36608	up
AT1G49730.1	27	32	32	54	54	45	7.18273	7.8481	8.24252	12.9822	12.8511	11.9491	0.00056525	1.0896	up
AT1G49750.1	80	86	86	152	148	147	21.2821	21.0918	22.1518	36.5424	35.2214	39.0338	5.46619e-11	1.18233	up
AT1G49760.1	92	68	135	202	138	130	24.4745	16.6772	34.7731	48.5629	32.8416	34.5197	0.000590371	1.00396	up
AT1G49860.1	81	76	79	7	10	7	21.5482	18.6392	20.3487	1.68287	2.37983	1.85875	3.89149e-13	-2.84136	down
AT1G49960.1	17	23	24	0	0	2	4.52246	5.64082	6.18189	0	0	0.531072	1.00959e-05	-3.72794	down
AT1G49975.1	99	104	94	245	303	222	26.3367	25.5063	24.2124	58.9006	72.1087	58.949	3.55939e-25	1.72405	up
AT1G50040.1	10	4	0	34	48	35	2.66027	0.981012	0	8.17396	11.4232	9.29376	8.40737e-08	3.15828	up
AT1G50060.1	91	154	128	13	19	12	24.2084	37.769	32.9701	3.12534	4.52167	3.18643	2.3257e-15	-2.65239	down
AT1G50110.1	21	24	23	7	6	4	5.58656	5.88607	5.92431	1.68287	1.4279	1.06214	0.00737198	-1.5419	down
AT1G50250.1	114	109	113	269	273	250	30.3271	26.7326	29.1064	64.6705	64.9692	66.384	4.08756e-28	1.59119	up
AT1G50280.1	2	3	1	5	13	9	0.532054	0.735759	0.257579	1.20205	3.09377	2.38983	0.00944231	2.17492	up
AT1G50290.1	31	22	35	51	55	52	8.24683	5.39557	9.01526	12.2609	13.089	13.8079	0.000478134	1.17806	up
AT1G50520.1	19	26	21	7	3	2	5.05451	6.37658	5.40915	1.68287	0.713948	0.531072	0.00233636	-1.93714	down
AT1G50560.1	44	55	46	15	17	16	11.7052	13.4889	11.8486	3.60616	4.0457	4.24858	0.00195256	-1.19564	down
AT1G50580.1	9	15	6	0	0	1	2.39424	3.6788	1.54547	0	0	0.265536	0.00192623	-3.15142	down
AT1G50732.1	17	26	32	103	135	129	4.52246	6.37658	8.24252	24.7623	32.1276	34.2542	5.32082e-20	2.61343	up
AT1G50740.1	282	323	329	125	129	103	75.0196	79.2167	84.7434	30.0513	30.6997	27.3502	6.57072e-12	-1.02253	down
AT1G50900.1	400	462	361	1102	1152	1013	106.411	113.307	92.9859	264.933	274.156	268.988	2.91637e-93	1.7779	up
AT1G51035.1	2	2	2	14	13	18	0.532054	0.490506	0.515158	3.36575	3.09377	4.77965	5.22118e-05	2.90243	up
AT1G51060.1	1146	1176	1143	408	414	314	304.867	288.418	294.413	98.0875	98.5248	83.3783	6.89661e-47	-1.24882	down
AT1G51110.1	44	54	52	133	137	128	11.7052	13.2437	13.3941	31.9746	32.6036	33.9886	2.13666e-17	1.75566	up
AT1G51170.1	73	76	75	14	13	14	19.42	18.6392	19.3184	3.36575	3.09377	3.71751	2.76476e-09	-2.03659	down
AT1G51310.1	18	25	23	48	46	40	4.78848	6.13133	5.92431	11.5397	10.9472	10.6214	0.000110952	1.35155	up
AT1G51400.1	398	442	384	2248	2464	2200	105.879	108.402	98.9103	540.443	586.389	584.179	0	2.85766	up
AT1G51580.1	50	48	43	69	77	95	13.3013	11.7721	11.0759	16.5883	18.3247	25.2259	6.29208e-05	1.12696	up
AT1G51590.1	12	19	10	78	94	15	3.19232	4.65981	2.57579	18.752	22.3704	3.98304	4.29548e-05	2.35524	up
AT1G51620.1	21	29	33	8	0	6	5.58656	7.11234	8.5001	1.92328	0	1.59322	0.00267243	-2.00598	down
AT1G51660.1	68	107	94	32	31	22	18.0898	26.2421	24.2124	7.69314	7.37746	5.84179	3.55124e-05	-1.27638	down
AT1G51680.3	949	849	1526	86	264	236	252.459	208.22	393.065	20.6753	62.8274	62.6665	0.000563681	-1.99144	down
AT1G51700.1	205	269	239	52	64	48	54.5355	65.9731	61.5613	12.5014	15.2309	12.7457	3.399e-19	-1.74271	down
AT1G51805.1	210	253	233	69	88	70	55.8656	62.049	60.0159	16.5883	20.9425	18.5875	3.75394e-12	-1.24466	down
AT1G51820.1	116	136	122	19	19	10	30.8591	33.3544	31.4246	4.5678	4.52167	2.65536	9.03528e-18	-2.5546	down
AT1G51913.1	163	137	193	12	8	6	43.3624	33.5997	49.7127	2.88493	1.90386	1.59322	2.25745e-26	-3.78181	down
AT1G51940.1	77	85	62	138	130	131	20.4841	20.8465	15.9699	33.1767	30.9377	34.7852	3.28165e-09	1.18778	up
AT1G52050.1	82	101	82	13	8	9	21.8142	24.7706	21.1215	3.12534	1.90386	2.38983	1.05109e-13	-2.70156	down
AT1G52060.1	28	40	24	1	1	1	7.44875	9.81012	6.18189	0.240411	0.237983	0.265536	2.44662e-07	-3.8979	down
AT1G52070.1	180	201	186	31	24	12	47.8848	49.2959	47.9097	7.45273	5.71158	3.18643	4.13436e-25	-2.68667	down
AT1G52190.1	153	147	109	242	254	221	40.7021	36.0522	28.0761	58.1794	60.4476	58.6835	2.69163e-12	1.1647	up
AT1G52200.1	4666	5237	5548	1651	1581	1287	1241.28	1284.39	1429.05	396.918	376.25	341.745	1.71365e-76	-1.41383	down
AT1G52220.1	352	389	354	1085	1120	1007	93.6415	95.4034	91.1829	260.846	266.54	267.395	4.88003e-134	1.91254	up
AT1G52230.1	1580	1736	1600	5418	5826	5212	420.322	425.759	412.126	1302.54	1386.49	1383.97	0	2.10506	up
AT1G52342.1	75	82	74	389	325	294	19.952	20.1107	19.0608	93.5197	77.3443	78.0676	8.13319e-56	2.47121	up
AT1G52710.2	57	77	73	22	27	21	15.1635	18.8845	18.8033	5.28903	6.42553	5.57626	0.000345621	-1.1762	down
AT1G52760.1	62	52	59	17	30	5	16.4937	12.7532	15.1971	4.08698	7.13948	1.32768	0.00888904	-1.33216	down
AT1G52780.1	129	105	103	40	47	42	34.3175	25.7516	26.5306	9.61642	11.1852	11.1525	9.05432e-05	-1.01222	down
AT1G52800.1	15	30	30	3	1	3	3.9904	7.35759	7.72736	0.721232	0.237983	0.796608	7.81822e-05	-2.73198	down
AT1G52827.1	37	25	21	57	60	40	9.84299	6.13133	5.40915	13.7034	14.279	10.6214	0.000624794	1.23985	up
AT1G52880.1	79	68	79	16	20	19	21.0161	16.6772	20.3487	3.84657	4.75965	5.04519	7.79088e-07	-1.64069	down
AT1G52910.1	144	168	154	44	41	38	38.3079	41.2025	39.6671	10.5781	9.75728	10.0904	7.57247e-13	-1.54426	down
AT1G53035.1	140	156	154	43	52	38	37.2438	38.2595	39.6671	10.3377	12.3751	10.0904	2.38483e-10	-1.38429	down
AT1G53070.1	29	43	34	8	7	4	7.71478	10.5459	8.75768	1.92328	1.66588	1.06214	8.10964e-05	-2.0097	down
AT1G53130.1	4	10	12	0	0	1	1.06411	2.45253	3.09095	0	0	0.265536	0.00462035	-2.95988	down
AT1G53210.1	832	851	773	1406	1483	1349	221.334	208.71	199.108	338.017	352.928	358.208	4.94494e-63	1.14853	up
AT1G53270.1	8	7	10	0	0	0	2.12821	1.71677	2.57579	0	0	0	0.000945055	-3.62686	down
AT1G53310.2	673	734	767	213	164	151	179.036	180.016	197.563	51.2075	39.0291	40.096	2.42374e-41	-1.67765	down
AT1G53340.1	16	29	17	4	3	3	4.25643	7.11234	4.37884	0.961642	0.713948	0.796608	0.00185202	-2.06455	down
AT1G53380.2	40	45	29	9	4	8	10.6411	11.0364	7.46979	2.1637	0.95193	2.12429	0.000102887	-1.96765	down
AT1G53450.1	9	11	4	19	17	21	2.39424	2.69778	1.03032	4.5678	4.0457	5.57626	0.00769376	1.52238	up
AT1G53450.2	5	5	5	20	14	15	1.33013	1.22627	1.28789	4.80821	3.33176	3.98304	0.00144492	1.9208	up
AT1G53540.1	5	2	6	182	93	72	1.33013	0.490506	1.54547	43.7547	22.1324	19.1186	2.555e-22	4.78833	up
AT1G53560.1	180	195	203	439	499	416	47.8848	47.8243	52.2885	105.54	118.753	110.463	3.73877e-39	1.58462	up
AT1G53625.1	133	155	224	69	31	38	35.3816	38.0142	57.6977	16.5883	7.37746	10.0904	3.17666e-06	-1.50656	down
AT1G53670.1	180	180	167	507	527	478	47.8848	44.1455	43.0157	121.888	125.417	126.926	1.48591e-62	1.8775	up
AT1G53680.1	11	13	19	0	1	1	2.9263	3.18829	4.894	0	0.237983	0.265536	0.000352225	-3.20894	down
AT1G53700.1	53	68	47	6	4	9	14.0994	16.6772	12.1062	1.44246	0.95193	2.38983	1.37939e-08	-2.64378	down
AT1G53920.1	126	120	117	43	23	21	33.5194	29.4304	30.1367	10.3377	5.4736	5.57626	6.68042e-09	-1.67873	down
AT1G54000.1	867	992	855	158	106	85	230.645	243.291	220.23	37.9849	25.2261	22.5706	1.71824e-64	-2.59001	down
AT1G54050.1	12	16	17	44	44	25	3.19232	3.92405	4.37884	10.5781	10.4712	6.6384	0.000116517	1.62321	up
AT1G54100.1	237	233	233	398	408	374	63.0484	57.144	60.0159	95.6834	97.0969	99.3105	1.53083e-22	1.10582	up
AT1G54100.2	203	289	268	598	714	545	54.0035	70.8781	69.0311	143.766	169.92	144.717	1.11041e-33	1.6454	up
AT1G54217.2	20	23	34	3	1	4	5.32054	5.64082	8.75768	0.721232	0.237983	1.06214	8.24673e-05	-2.6232	down
AT1G54410.1	10046	11045	10788	18743	18029	16423	2672.51	2708.82	2778.76	4506.02	4290.59	4360.9	3.6833e-171	1.0998	up
AT1G54500.1	305	300	300	835	855	819	81.1382	73.5759	77.2736	200.743	203.475	217.474	3.87415e-90	1.83072	up
AT1G54520.1	93	112	101	212	242	189	24.7405	27.4683	26.0155	50.9671	57.5918	50.1863	2.57804e-18	1.42468	up
AT1G54540.1	20	43	39	0	0	0	5.32054	10.5459	10.0456	0	0	0	2.84414e-08	-5.26546	down
AT1G54570.1	86	102	114	42	19	21	22.8783	25.0158	29.364	10.0972	4.52167	5.57626	7.69653e-06	-1.49288	down
AT1G54740.1	44	44	43	218	271	225	11.7052	10.7911	11.0759	52.4095	64.4933	59.7456	9.98437e-46	2.78539	up
AT1G54780.1	381	385	334	1355	1415	1172	101.356	94.4224	86.0313	325.756	336.745	311.208	5.41879e-157	2.1982	up
AT1G54890.1	11	23	14	1	3	2	2.9263	5.64082	3.6061	0.240411	0.713948	0.531072	0.00284571	-2.29963	down
AT1G54970.1	221	243	259	15	27	16	58.7919	59.5965	66.7129	3.60616	6.42553	4.24858	2.09663e-37	-3.23314	down
AT1G54990.1	111	110	108	37	48	27	29.529	26.9778	27.8185	8.89519	11.4232	7.16948	8.1106e-06	-1.18236	down
AT1G55000.1	207	184	210	357	352	313	55.0676	45.1266	54.0915	85.8266	83.7699	83.1128	3.67294e-18	1.12101	up
AT1G55000.2	17	3	9	34	22	36	4.52246	0.735759	2.31821	8.17396	5.23562	9.5593	0.001245	1.88682	up
AT1G55152.1	63	75	79	123	159	114	16.7597	18.394	20.3487	29.5705	37.8392	30.2711	1.46598e-08	1.21691	up
AT1G55210.1	345	376	404	79	38	59	91.7793	92.2151	104.062	18.9924	9.04334	15.6666	7.12646e-27	-2.29208	down
AT1G55210.2	25	17	21	1	0	1	6.65067	4.1693	5.40915	0.240411	0	0.265536	1.01874e-05	-3.72605	down
AT1G55265.1	216	255	245	52	49	34	57.4618	62.5395	63.1068	12.5014	11.6611	9.02823	7.22683e-25	-2.031	down
AT1G55320.1	44	41	50	14	6	7	11.7052	10.0554	12.8789	3.36575	1.4279	1.85875	4.51204e-05	-1.88482	down
AT1G55370.1	16	15	13	61	54	60	4.25643	3.6788	3.34852	14.665	12.8511	15.9322	3.85598e-11	2.29667	up
AT1G55370.2	0	2	3	29	20	14	0	0.490506	0.772736	6.97191	4.75965	3.71751	1.06304e-06	3.51476	up
AT1G55390.1	8	10	13	1	0	1	2.12821	2.45253	3.34852	0.240411	0	0.265536	0.00318601	-2.78971	down
AT1G55480.1	98	122	106	412	368	324	26.0706	29.9209	27.3034	99.0492	87.5776	86.0337	1.42255e-51	2.11138	up
AT1G55490.2	51	60	60	134	127	87	13.5674	14.7152	15.4547	32.215	30.2238	23.1016	3.02512e-09	1.36545	up
AT1G55510.1	24	41	37	95	93	62	6.38464	10.0554	9.53042	22.839	22.1324	16.4632	3.37579e-08	1.62242	up
AT1G55610.1	7	11	5	0	1	0	1.86219	2.69778	1.28789	0	0.237983	0	0.00704947	-2.84538	down
AT1G55670.1	1974	2136	1842	12962	13539	12986	525.137	523.86	474.46	3116.2	3222.05	3448.25	0	3.09272	up
AT1G55760.1	251	309	334	25	25	18	66.7727	75.7832	86.0313	6.01027	5.94956	4.77965	2.15697e-44	-3.3147	down
AT1G55805.1	143	178	164	276	302	243	38.0418	43.655	42.2429	66.3533	71.8707	64.5253	2.71168e-15	1.11652	up
AT1G55810.1	25	20	26	65	60	57	6.65067	4.90506	6.69705	15.6267	14.279	15.1356	7.08635e-08	1.68331	up
AT1G55810.2	9	4	2	24	17	22	2.39424	0.981012	0.515158	5.76985	4.0457	5.84179	0.000240018	2.24574	up
AT1G55810.3	35	30	36	116	115	111	9.31094	7.35759	9.27284	27.8876	27.368	29.4745	1.06859e-18	2.09572	up
AT1G55910.1	109	122	142	19	28	17	28.9969	29.9209	36.5762	4.5678	6.66351	4.51411	1.44279e-13	-2.14542	down
AT1G55940.1	11	7	16	1	0	0	2.9263	1.71677	4.12126	0.240411	0	0	0.000824707	-3.33482	down
AT1G56080.1	68	78	67	11	20	10	18.0898	19.1297	17.2578	2.64452	4.75965	2.65536	1.03824e-07	-1.96137	down
AT1G56150.1	71	80	104	18	25	19	18.8879	19.6202	26.7882	4.32739	5.94956	5.04519	7.76016e-07	-1.64222	down
AT1G56200.1	710	746	658	1174	1401	1157	188.879	182.959	169.487	282.242	333.414	307.225	2.65688e-40	1.1805	up
AT1G56220.3	1309	673	238	4730	3560	5202	348.229	165.055	61.3038	1137.14	847.218	1381.32	3.33746e-05	2.70462	up
AT1G56220.4	0	0	0	361	940	110	0	0	0	86.7882	223.704	29.209	1.46718e-14	7.29894	up
AT1G56240.1	40	54	33	1	9	4	10.6411	13.2437	8.5001	0.240411	2.14184	1.06214	4.80405e-06	-2.61825	down
AT1G56280.1	91	40	21	289	299	285	24.2084	9.81012	5.40915	69.4787	71.1568	75.6778	5.44193e-06	2.6688	up
AT1G56320.1	49	59	64	3	1	3	13.0353	14.4699	16.485	0.721232	0.237983	0.796608	1.02587e-11	-3.92126	down
AT1G56340.1	1813	2079	1900	765	653	584	482.307	509.881	489.4	183.914	155.403	155.073	5.29344e-55	-1.17093	down
AT1G56430.1	12	17	15	3	1	2	3.19232	4.1693	3.86368	0.721232	0.237983	0.531072	0.00387894	-2.2073	down
AT1G56520.2	33	10	24	44	43	40	8.77889	2.45253	6.18189	10.5781	10.2332	10.6214	0.00901399	1.22165	up
AT1G56550.1	36	44	34	9	12	9	9.57697	10.7911	8.75768	2.1637	2.85579	2.38983	0.000893652	-1.50172	down
AT1G56600.1	21	20	29	2	7	1	5.58656	4.90506	7.46979	0.480821	1.66588	0.265536	0.00102479	-2.22812	down
AT1G57560.1	22	25	20	1	7	1	5.85259	6.13133	5.15158	0.240411	1.66588	0.265536	0.00109063	-2.28511	down
AT1G57630.1	25	28	41	4	1	3	6.65067	6.86708	10.5607	0.961642	0.237983	0.796608	5.3046e-06	-2.90766	down
AT1G57765.1	0	0	0	139	157	143	0	0	0	33.4171	37.3633	37.9717	2.93393e-22	7.75325	up
AT1G57765.2	193	200	197	0	0	0	51.3432	49.0506	50.743	0	0	0	1.39989e-20	-7.51221	down
AT1G57770.1	4	5	3	19	34	17	1.06411	1.22627	0.772736	4.5678	8.09141	4.51411	9.19402e-06	2.67805	up
AT1G57790.1	23	24	20	38	44	37	6.11862	5.88607	5.15158	9.1356	10.4712	9.82484	0.00145966	1.16198	up
AT1G58030.1	193	180	183	312	333	282	51.3432	44.1455	47.1369	75.0081	79.2482	74.8812	4.95754e-17	1.09347	up
AT1G58070.1	27	29	27	37	46	48	7.18273	7.11234	6.95463	8.89519	10.9472	12.7457	0.00484117	1.00349	up
AT1G58080.1	143	170	140	341	295	276	38.0418	41.693	36.061	81.98	70.2048	73.288	4.71803e-23	1.36569	up
AT1G58170.1	18	20	24	4	1	0	4.78848	4.90506	6.18189	0.961642	0.237983	0	0.000142914	-2.86538	down
AT1G58225.1	6	6	6	0	0	0	1.59616	1.47152	1.54547	0	0	0	0.00430055	-3.25513	down
AT1G58290.1	205	164	170	393	431	349	54.5355	40.2215	43.7884	94.4814	102.57	92.6721	3.38458e-25	1.4729	up
AT1G58420.1	14	13	13	0	3	0	3.72438	3.18829	3.34852	0	0.713948	0	0.00165583	-2.7683	down
AT1G58936.1	5	6	5	0	0	0	1.33013	1.47152	1.28789	0	0	0	0.00700524	-3.1193	down
AT1G59171.1	8	7	16	0	1	0	2.12821	1.71677	4.12126	0	0.237983	0	0.00156621	-3.20642	down
AT1G59730.1	6	9	20	2	0	0	1.59616	2.20728	5.15158	0.480821	0	0	0.00336514	-2.8664	down
AT1G59740.1	71	65	77	25	18	19	18.8879	15.9414	19.8336	6.01027	4.28369	5.04519	2.64535e-05	-1.39221	down
AT1G59840.1	6	9	8	23	23	31	1.59616	2.20728	2.06063	5.52944	5.4736	8.23162	8.01892e-05	2.00803	up
AT1G59840.2	7	9	7	24	26	35	1.86219	2.20728	1.80305	5.76985	6.18755	9.29376	1.7288e-05	2.14702	up
AT1G59940.1	72	52	49	3	2	6	19.1539	12.7532	12.6214	0.721232	0.475965	1.59322	2.90451e-10	-3.37755	down
AT1G59970.1	58	79	56	16	10	22	15.4296	19.375	14.4244	3.84657	2.37983	5.84179	7.30997e-05	-1.58016	down
AT1G60000.1	175	164	152	372	297	324	46.5547	40.2215	39.152	89.4328	70.6808	86.0337	5.13091e-21	1.37163	up
AT1G60110.1	47	45	58	16	8	8	12.5033	11.0364	14.9396	3.84657	1.90386	2.12429	3.72808e-05	-1.80469	down
AT1G60140.1	55	70	53	218	189	179	14.6315	17.1677	13.6517	52.4095	44.9787	47.531	7.25375e-29	2.06613	up
AT1G60160.1	43	37	37	118	112	83	11.4392	9.07436	9.53042	28.3685	26.654	22.0395	1.01619e-12	1.75218	up
AT1G60390.1	44	38	34	5	2	4	11.7052	9.31961	8.75768	1.20205	0.475965	1.06214	3.62952e-07	-2.83421	down
AT1G60470.1	9	19	18	1	2	0	2.39424	4.65981	4.63642	0.240411	0.475965	0	0.000607897	-2.94651	down
AT1G60550.1	68	72	84	132	169	122	18.0898	17.6582	21.6366	31.7342	40.219	32.3954	1.92641e-09	1.26486	up
AT1G60680.1	248	288	303	65	38	46	65.9747	70.6329	78.0464	15.6267	9.04334	12.2147	1.42511e-24	-2.11324	down
AT1G60730.1	183	186	183	74	54	50	48.6829	45.6171	47.1369	17.7904	12.8511	13.2768	2.87359e-10	-1.26441	down
AT1G60800.1	57	34	44	74	83	65	15.1635	8.3386	11.3335	17.7904	19.7526	17.2598	0.000426675	1.05361	up
AT1G60850.1	22	19	22	0	0	0	5.85259	4.65981	5.66673	0	0	0	1.58644e-06	-4.73694	down
AT1G60850.2	0	0	0	22	23	22	0	0	0	5.28903	5.4736	5.84179	1.00365e-08	5.38542	up
AT1G60890.1	76	75	70	24	30	24	20.218	18.394	18.0305	5.76985	7.13948	6.37287	0.000262698	-1.12108	down
AT1G60950.1	296	293	253	1452	1395	1201	78.7439	71.8591	65.1674	349.076	331.986	318.909	6.0684e-209	2.62069	up
AT1G60970.1	34	44	46	2	2	7	9.04491	10.7911	11.8486	0.480821	0.475965	1.85875	3.54236e-07	-2.89764	down
AT1G61050.1	31	38	49	6	4	3	8.24683	9.31961	12.6214	1.44246	0.95193	0.796608	1.16315e-06	-2.64756	down
AT1G61255.1	38	39	45	7	11	6	10.109	9.56487	11.591	1.68287	2.61781	1.59322	4.6132e-05	-1.90215	down
AT1G61260.1	44	51	65	12	16	9	11.7052	12.5079	16.7426	2.88493	3.80772	2.38983	4.42374e-05	-1.69632	down
AT1G61370.1	55	52	46	10	17	10	14.6315	12.7532	11.8486	2.40411	4.0457	2.65536	6.75337e-05	-1.63362	down
AT1G61380.1	243	272	258	79	69	91	64.6445	66.7088	66.4553	18.9924	16.4208	24.1638	2.31646e-13	-1.31701	down
AT1G61450.1	21	16	20	2	1	0	5.58656	3.92405	5.15158	0.480821	0.237983	0	5.6266e-05	-3.26851	down
AT1G61520.1	2371	2544	2291	13073	14021	12480	630.75	623.924	590.113	3142.89	3336.75	3313.89	0	2.81868	up
AT1G61520.2	11	14	16	36	40	32	2.9263	3.43354	4.12126	8.65478	9.5193	8.49716	2.98101e-05	1.70109	up
AT1G61740.1	431	447	359	697	680	694	114.658	109.628	92.4708	167.566	161.828	184.282	2.42243e-25	1.10601	up
AT1G61790.1	371	442	419	20	35	26	98.696	108.402	107.926	4.80821	8.32939	6.90394	4.93485e-64	-3.52863	down
AT1G61795.1	47	42	46	18	17	9	12.5033	10.3006	11.8486	4.32739	4.0457	2.38983	0.0033894	-1.22596	down
AT1G61800.1	358	439	507	17	12	13	95.2376	107.666	130.592	4.08698	2.85579	3.45197	1.70627e-62	-4.51902	down
AT1G61930.1	50	64	78	1	5	5	13.3013	15.6962	20.0911	0.240411	1.18991	1.32768	2.21533e-11	-3.52218	down
AT1G62262.1	10	25	20	0	0	0	2.66027	6.13133	5.15158	0	0	0	8.55965e-06	-4.50766	down
AT1G62290.2	112	105	105	216	188	188	29.795	25.7516	27.0458	51.9287	44.7407	49.9208	3.43469e-14	1.2326	up
AT1G62420.1	1	1	9	13	18	18	0.266027	0.245253	2.31821	3.12534	4.28369	4.77965	0.00326022	2.22545	up
AT1G62430.1	90	99	114	30	42	22	23.9424	24.28	29.364	7.21232	9.99527	5.84179	9.49292e-06	-1.31034	down
AT1G62480.1	2803	2907	2762	4509	5067	4526	745.673	712.95	711.433	1084.01	1205.86	1201.82	1.6283e-67	1.09757	up
AT1G62510.1	78	86	84	2183	2041	1930	20.7501	21.0918	21.6366	524.816	485.722	512.485	0	4.98215	up
AT1G62560.1	92	107	132	19	8	6	24.4745	26.2421	34.0004	4.5678	1.90386	1.59322	4.87717e-14	-2.88142	down
AT1G62570.1	133	149	152	55	62	47	35.3816	36.5427	39.152	13.2226	14.7549	12.4802	1.21581e-06	-1.03444	down
AT1G62710.1	51	51	53	23	21	14	13.5674	12.5079	13.6517	5.52944	4.99763	3.71751	0.00544942	-1.03661	down
AT1G62750.1	119	112	121	465	444	359	31.6572	27.4683	31.167	111.791	105.664	95.3275	3.85115e-59	2.19708	up
AT1G62770.1	155	164	131	471	520	467	41.2342	40.2215	33.7428	113.233	123.751	124.005	1.13947e-58	2.05252	up
AT1G62780.1	57	75	52	134	164	157	15.1635	18.394	13.3941	32.215	39.0291	41.6892	1.80792e-14	1.65928	up
AT1G62790.1	356	411	399	123	151	131	94.7056	100.799	102.774	29.5705	35.9354	34.7852	3.21001e-16	-1.15673	down
AT1G62840.1	44	52	64	9	16	19	11.7052	12.7532	16.485	2.1637	3.80772	5.04519	0.000769112	-1.4388	down
AT1G62870.1	11	13	9	1	1	0	2.9263	3.18829	2.31821	0.240411	0.237983	0	0.00198078	-2.8834	down
AT1G62980.1	287	357	377	13	23	29	76.3497	87.5553	97.1072	3.12534	5.4736	7.70055	7.27197e-45	-3.55216	down
AT1G62990.1	75	81	90	25	13	11	19.952	19.8655	23.1821	6.01027	3.09377	2.9209	6.07732e-08	-1.92377	down
AT1G63000.1	423	453	392	152	153	114	112.529	111.1	100.971	36.5424	36.4113	30.2711	1.00471e-19	-1.23375	down
AT1G63180.1	34	36	26	135	151	121	9.04491	8.82911	6.69705	32.4554	35.9354	32.1299	4.58703e-25	2.41644	up
AT1G63220.1	630	695	670	194	162	143	167.597	170.451	172.578	46.6397	38.5532	37.9717	5.3564e-46	-1.63491	down
AT1G63260.3	34	33	47	59	76	60	9.04491	8.09335	12.1062	14.1842	18.0867	15.9322	0.000270321	1.11447	up
AT1G63420.1	36	17	28	7	3	2	9.57697	4.1693	7.21221	1.68287	0.713948	0.531072	0.000655454	-2.20969	down
AT1G63450.1	14	15	16	0	1	1	3.72438	3.6788	4.12126	0	0.237983	0.265536	0.000190679	-3.28794	down
AT1G63460.1	619	716	687	264	262	222	164.671	175.601	176.957	63.4684	62.3514	58.949	9.33022e-26	-1.07102	down
AT1G63530.1	25	42	40	8	4	4	6.65067	10.3006	10.3032	1.92328	0.95193	1.06214	3.82785e-05	-2.23685	down
AT1G63840.1	387	433	458	170	152	114	102.952	106.195	117.971	40.8698	36.1733	30.2711	5.78275e-16	-1.18946	down
AT1G63930.1	12	7	15	1	1	1	3.19232	1.71677	3.86368	0.240411	0.237983	0.265536	0.00431232	-2.56517	down
AT1G63940.1	114	119	93	270	264	234	30.3271	29.1851	23.9548	64.9109	62.8274	62.1355	1.39789e-25	1.58979	up
AT1G64060.1	109	126	128	34	28	33	28.9969	30.9019	32.9701	8.17396	6.66351	8.76269	7.97323e-10	-1.54948	down
AT1G64150.1	16	8	18	26	28	39	4.25643	1.96202	4.63642	6.25068	6.66351	10.3559	0.00337806	1.44566	up
AT1G64230.1	1613	1867	1523	3205	3374	3163	429.101	457.887	392.293	770.516	802.953	839.891	5.38362e-80	1.32582	up
AT1G64355.1	27	22	21	80	82	80	7.18273	5.39557	5.40915	19.2328	19.5146	21.2429	1.55018e-13	2.11495	up
AT1G64360.1	37	48	37	14	5	5	9.84299	11.7721	9.53042	3.36575	1.18991	1.32768	0.000164968	-1.89139	down
AT1G64370.1	288	356	352	660	622	547	76.6157	87.3101	90.6677	158.671	148.025	145.248	2.55816e-33	1.23525	up
AT1G64400.1	136	177	154	24	13	19	36.1797	43.4098	39.6671	5.76985	3.09377	5.04519	2.85003e-21	-2.64964	down
AT1G64405.1	134	174	165	26	24	16	35.6476	42.674	42.5005	6.25068	5.71158	4.24858	1.90127e-20	-2.44439	down
AT1G64430.1	7	9	14	25	27	28	1.86219	2.20728	3.6061	6.01027	6.42553	7.43501	0.000477626	1.69957	up
AT1G64500.1	19	16	20	106	100	68	5.05451	3.92405	5.15158	25.4835	23.7983	18.0565	1.73022e-17	2.61488	up
AT1G64510.1	336	360	314	974	1016	942	89.385	88.2911	80.8797	234.16	241.79	250.135	2.58969e-110	1.89798	up
AT1G64590.1	51	61	65	5	4	5	13.5674	14.9604	16.7426	1.20205	0.95193	1.32768	6.22824e-11	-3.13083	down
AT1G64660.1	36	31	30	149	134	128	9.57697	7.60284	7.72736	35.8212	31.8897	33.9886	2.89446e-26	2.41607	up
AT1G64680.1	63	64	53	334	276	276	16.7597	15.6962	13.6517	80.2971	65.6832	73.288	6.03802e-54	2.64352	up
AT1G64700.1	27	31	26	4	8	4	7.18273	7.60284	6.69705	0.961642	1.90386	1.06214	0.00059101	-1.90839	down
AT1G64720.1	577	514	486	3055	3224	2789	153.497	126.06	125.183	734.454	767.256	740.58	1.19826e-299	2.8796	up
AT1G64780.1	102	111	101	15	16	17	27.1347	27.2231	26.0155	3.60616	3.80772	4.51411	2.73502e-14	-2.30016	down
AT1G64860.1	75	63	53	181	123	140	19.952	15.4509	13.6517	43.5143	29.2719	37.1751	2.02047e-11	1.55855	up
AT1G65060.1	16	9	13	0	4	0	4.25643	2.20728	3.34852	0	0.95193	0	0.00834701	-2.38538	down
AT1G65070.2	14	15	12	29	39	19	3.72438	3.6788	3.09095	6.97191	9.28132	5.04519	0.00329824	1.3802	up
AT1G65190.1	25	34	38	63	48	46	6.65067	8.3386	9.78799	15.1459	11.4232	12.2147	0.00193214	1.03341	up
AT1G65230.1	51	43	38	288	301	241	13.5674	10.5459	9.78799	69.2383	71.6327	63.9942	3.28669e-58	2.98815	up
AT1G65250.1	23	24	19	1	2	2	6.11862	5.88607	4.894	0.240411	0.475965	0.531072	3.79256e-05	-2.96297	down
AT1G65260.1	224	250	221	556	585	457	59.59	61.3133	56.9249	133.668	139.22	121.35	8.0298e-45	1.55665	up
AT1G65270.1	120	104	105	189	197	164	31.9232	25.5063	27.0458	45.4376	46.8826	43.5479	9.35353e-11	1.09357	up
AT1G65270.3	90	96	106	26	34	38	23.9424	23.5443	27.3034	6.25068	8.09141	10.0904	3.25227e-05	-1.18852	down
AT1G65480.1	2	1	2	12	7	6	0.532054	0.245253	0.515158	2.88493	1.66588	1.59322	0.00772541	2.26495	up
AT1G65481.1	83	70	75	10	6	3	22.0802	17.1677	19.3184	2.40411	1.4279	0.796608	9.69727e-13	-3.10079	down
AT1G65484.1	39	50	41	6	3	4	10.375	12.2627	10.5607	1.44246	0.713948	1.06214	7.91306e-08	-2.78726	down
AT1G65490.1	129	129	133	36	17	29	34.3175	31.6376	34.258	8.65478	4.0457	7.70055	3.84051e-11	-1.8604	down
AT1G65500.1	2138	2488	2673	265	222	172	568.765	610.189	688.508	63.7088	52.8321	45.6722	3.92089e-163	-3.10368	down
AT1G65610.1	79	95	110	23	22	22	21.0161	23.299	28.3337	5.52944	5.23562	5.84179	2.30357e-08	-1.68892	down
AT1G65620.1	15	24	11	1	2	0	3.9904	5.88607	2.83337	0.240411	0.475965	0	0.000315193	-3.05464	down
AT1G65690.1	310	372	369	65	55	34	82.4683	91.2341	95.0466	15.6267	13.089	9.02823	2.34713e-35	-2.39513	down
AT1G65730.1	83	106	105	13	5	8	22.0802	25.9968	27.0458	3.12534	1.18991	2.12429	1.47827e-15	-3.03849	down
AT1G65790.1	27	34	36	4	0	0	7.18273	8.3386	9.27284	0.961642	0	0	3.6067e-07	-3.69734	down
AT1G65800.1	75	82	87	26	27	16	19.952	20.1107	22.4094	6.25068	6.42553	4.24858	3.86109e-06	-1.43838	down
AT1G65845.1	5967	6503	6803	2329	2242	1969	1587.38	1594.88	1752.31	559.916	533.557	522.841	5.24623e-90	-1.19832	down
AT1G65860.1	88	110	100	26	17	25	23.4104	26.9778	25.7579	6.25068	4.0457	6.6384	4.86296e-09	-1.7336	down
AT1G65970.1	245	210	211	9092	9046	7756	65.1766	51.5031	54.3491	2185.81	2152.79	2059.5	0	5.6327	up
AT1G66090.1	28	37	42	3	2	0	7.44875	9.07436	10.8183	0.721232	0.475965	0	8.82449e-08	-3.62132	down
AT1G66130.1	10	11	12	60	53	41	2.66027	2.69778	3.09095	14.4246	12.6131	10.887	9.2744e-11	2.49771	up
AT1G66150.1	179	191	108	251	274	244	47.6188	46.8433	27.8185	60.3431	65.2072	64.7908	4.73137e-07	1.04244	up
AT1G66180.1	356	341	280	761	849	657	94.7056	83.6313	72.1221	182.952	202.047	174.457	1.13146e-41	1.56861	up
AT1G66200.1	2337	2581	2568	601	598	477	621.705	632.998	661.462	144.487	142.314	126.661	5.50435e-144	-1.7978	down
AT1G66230.1	16	21	16	33	40	32	4.25643	5.15031	4.12126	7.93355	9.5193	8.49716	0.000973085	1.31057	up
AT1G66270.1	1093	1425	1036	142	93	56	290.767	349.486	266.852	34.1383	22.1324	14.87	2.7043e-21	-3.18325	down
AT1G66280.1	399	479	429	114	90	87	106.145	117.476	110.501	27.4068	21.4184	23.1016	3.34277e-35	-1.79707	down
AT1G66330.2	25	27	27	39	46	47	6.65067	6.62183	6.95463	9.37601	10.9472	12.4802	0.00198186	1.0827	up
AT1G66350.1	102	71	72	27	39	28	27.1347	17.413	18.5457	6.49109	9.28132	7.43501	0.0026832	-1.00504	down
AT1G66390.1	35	46	49	1	1	1	9.31094	11.2816	12.6214	0.240411	0.237983	0.265536	1.00537e-09	-4.38026	down
AT1G66400.1	117	106	120	15	16	9	31.1251	25.9968	30.9095	3.60616	3.80772	2.38983	5.46086e-17	-2.68456	down
AT1G66440.1	7	9	11	1	1	0	1.86219	2.20728	2.83337	0.240411	0.237983	0	0.00684848	-2.62242	down
AT1G66450.1	4	5	9	0	0	0	1.06411	1.22627	2.31821	0	0	0	0.00497088	-3.22048	down
AT1G66480.1	57	51	46	18	11	7	15.1635	12.5079	11.8486	4.32739	2.61781	1.85875	8.03722e-05	-1.68442	down
AT1G66500.1	136	172	170	49	55	37	36.1797	42.1835	43.7884	11.7801	13.089	9.82484	5.50329e-10	-1.38722	down
AT1G66700.1	202	152	117	2	0	0	53.7374	37.2785	30.1367	0.480821	0	0	2.608e-20	-6.39141	down
AT1G66760.2	6	4	3	137	189	131	1.59616	0.981012	0.772736	32.9363	44.9787	34.7852	9.59671e-36	5.26363	up
AT1G66800.1	64	71	56	14	18	2	17.0257	17.413	14.4244	3.36575	4.28369	0.531072	2.30052e-05	-2.04749	down
AT1G66820.1	114	104	116	260	283	239	30.3271	25.5063	29.8791	62.5068	67.3491	63.4631	1.43082e-25	1.57941	up
AT1G66890.1	38	52	50	118	135	124	10.109	12.7532	12.8789	28.3685	32.1276	32.9265	1.61527e-15	1.77625	up
AT1G66920.2	131	147	146	25	28	20	34.8495	36.0522	37.6065	6.01027	6.66351	5.31072	2.18497e-17	-2.14832	down
AT1G67090.1	16355	17594	16026	72091	73981	64524	4350.87	4314.98	4127.96	17331.4	17606.2	17133.5	0	2.43566	up
AT1G67148.1	41	39	47	15	7	10	10.9071	9.56487	12.1062	3.60616	1.66588	2.65536	0.000518174	-1.56739	down
AT1G67150.1	8	16	18	0	2	1	2.12821	3.92405	4.63642	0	0.475965	0.265536	0.00132263	-2.81356	down
AT1G67265.1	25	33	25	89	118	87	6.65067	8.09335	6.43947	21.3965	28.0819	23.1016	3.82004e-15	2.15317	up
AT1G67330.1	260	290	269	57	64	58	69.167	71.1234	69.2887	13.7034	15.2309	15.4011	2.42717e-26	-1.81923	down
AT1G67360.1	20	27	20	4	3	1	5.32054	6.62183	5.15158	0.961642	0.713948	0.265536	0.000232625	-2.45552	down
AT1G67360.2	512	635	625	35	59	35	136.206	155.736	160.987	8.41437	14.041	9.29376	2.00083e-72	-3.3912	down
AT1G67470.1	52	48	56	22	17	14	13.8334	11.7721	14.4244	5.28903	4.0457	3.71751	0.0019881	-1.17068	down
AT1G67510.1	8	22	25	4	0	4	2.12821	5.39557	6.43947	0.961642	0	1.06214	0.00926654	-2.0902	down
AT1G67590.2	17	39	32	96	90	83	4.52246	9.56487	8.24252	23.0794	21.4184	22.0395	5.49783e-11	1.94308	up
AT1G67600.1	19	22	22	67	42	48	5.05451	5.39557	5.66673	16.1075	9.99527	12.7457	4.03143e-06	1.63559	up
AT1G67700.1	179	182	151	680	803	710	47.6188	44.636	38.8944	163.479	191.1	188.531	2.15433e-89	2.45479	up
AT1G67740.1	481	550	504	1898	2036	1845	127.959	134.889	129.82	456.299	484.532	489.914	4.73729e-227	2.27388	up
AT1G67750.1	110	138	135	26	25	21	29.263	33.8449	34.7731	6.25068	5.94956	5.57626	2.39775e-14	-2.01917	down
AT1G67760.1	11	13	15	0	3	2	2.9263	3.18829	3.86368	0	0.713948	0.531072	0.00681006	-2.22721	down
AT1G67800.1	25	38	31	6	2	3	6.65067	9.31961	7.98494	1.44246	0.475965	0.796608	1.83448e-05	-2.53165	down
AT1G67800.2	45	44	48	11	23	10	11.9712	10.7911	12.3638	2.64452	5.4736	2.65536	0.00531065	-1.23777	down
AT1G67810.1	78	68	74	20	9	14	20.7501	16.6772	19.0608	4.80821	2.14184	3.71751	1.42287e-07	-1.94167	down
AT1G67820.1	32	26	39	4	5	5	8.51286	6.37658	10.0456	0.961642	1.18991	1.32768	3.99281e-05	-2.27952	down
AT1G67850.2	59	49	58	9	23	13	15.6956	12.0174	14.9396	2.1637	5.4736	3.45197	0.000543244	-1.47256	down
AT1G67910.1	46	45	43	483	652	602	12.2372	11.0364	11.0759	116.118	155.165	159.853	7.87672e-98	4.03059	up
AT1G67910.2	0	1	2	11	15	18	0	0.245253	0.515158	2.64452	3.56974	4.77965	1.4193e-05	3.53922	up
AT1G67940.1	285	360	316	56	47	45	75.8177	88.2911	81.3949	13.463	11.1852	11.9491	1.10764e-37	-2.31917	down
AT1G67950.3	0	0	0	10	25	18	0	0	0	2.40411	5.94956	4.77965	2.66415e-07	5.02245	up
AT1G67980.1	4	6	2	22	24	14	1.06411	1.47152	0.515158	5.28903	5.71158	3.71751	5.69674e-05	2.4697	up
AT1G68010.1	102	93	101	953	1022	885	27.1347	22.8085	26.0155	229.111	243.218	234.999	6.40297e-215	3.62252	up
AT1G68110.1	15	20	11	49	72	66	3.9904	4.90506	2.83337	11.7801	17.1347	17.5254	3.1622e-10	2.32648	up
AT1G68150.1	52	39	52	14	12	14	13.8334	9.56487	13.3941	3.36575	2.85579	3.71751	0.000566905	-1.43073	down
AT1G68190.1	7	9	7	64	71	60	1.86219	2.20728	1.80305	15.3863	16.8968	15.9322	1.95154e-17	3.3303	up
AT1G68238.1	58	46	40	423	515	475	15.4296	11.2816	10.3032	101.694	122.561	126.13	1.32866e-86	3.63163	up
AT1G68240.2	0	1	0	11	8	6	0	0.245253	0	2.64452	1.90386	1.59322	0.000335752	3.53397	up
AT1G68430.1	20	28	25	10	3	2	5.32054	6.86708	6.43947	2.40411	0.713948	0.531072	0.00513746	-1.78354	down
AT1G68470.1	25	34	21	1	4	2	6.65067	8.3386	5.40915	0.240411	0.95193	0.531072	2.14422e-05	-2.8389	down
AT1G68500.1	24	23	17	40	37	28	6.38464	5.64082	4.37884	9.61642	8.80535	7.43501	0.00912293	1.04097	up
AT1G68520.1	128	115	95	848	924	846	34.0514	28.2041	24.47	203.868	219.896	224.644	8.60682e-157	3.30514	up
AT1G68560.1	338	321	270	1004	947	951	89.9171	78.7262	69.5463	241.372	225.369	252.525	6.78362e-88	2.00199	up
AT1G68585.1	215	222	217	80	76	64	57.1958	54.4462	55.8946	19.2328	18.0867	16.9943	3.02724e-12	-1.20468	down
AT1G68590.1	525	553	515	1202	1287	1101	139.664	135.625	132.653	288.974	306.284	292.355	3.63257e-98	1.53192	up
AT1G68600.1	61	71	66	8	8	7	16.2276	17.413	17.0002	1.92328	1.90386	1.85875	8.1395e-11	-2.64655	down
AT1G68660.1	204	241	233	369	428	375	54.2695	59.106	60.0159	88.7115	101.857	99.576	6.32311e-20	1.14992	up
AT1G68670.1	23	25	17	216	205	166	6.11862	6.13133	4.37884	51.9287	48.7864	44.079	2.0299e-48	3.48926	up
AT1G68725.1	30	22	21	4	3	7	7.98081	5.39557	5.40915	0.961642	0.713948	1.85875	0.00214006	-1.86902	down
AT1G68730.1	32	42	60	17	8	7	8.51286	10.3006	15.4547	4.08698	1.90386	1.85875	0.00105419	-1.6335	down
AT1G68765.1	154	172	188	8	13	10	40.9681	42.1835	48.4248	1.92328	3.09377	2.65536	6.28565e-30	-3.60689	down
AT1G68850.1	17	22	26	1	1	1	4.52246	5.39557	6.69705	0.240411	0.237983	0.265536	1.37334e-05	-3.43926	down
AT1G68890.1	3	10	6	20	13	19	0.798081	2.45253	1.54547	4.80821	3.09377	5.04519	0.00592905	1.69727	up
AT1G69200.1	40	40	31	73	88	49	10.6411	9.81012	7.98494	17.55	20.9425	13.0113	5.75813e-05	1.24983	up
AT1G69240.1	10	13	14	1	2	0	2.66027	3.18829	3.6061	0.240411	0.475965	0	0.00218817	-2.68612	down
AT1G69260.1	3	6	5	36	35	38	0.798081	1.47152	1.28789	8.65478	8.32939	10.0904	4.52796e-10	3.14399	up
AT1G69410.1	2303	2648	2655	789	691	672	612.66	649.43	683.872	189.684	164.446	178.44	1.58521e-87	-1.45772	down
AT1G69450.2	109	134	112	37	24	35	28.9969	32.8639	28.8488	8.89519	5.71158	9.29376	1.91328e-08	-1.49801	down
AT1G69490.1	155	238	177	45	13	33	41.2342	58.3702	45.5914	10.8185	3.09377	8.76269	5.22247e-11	-2.22246	down
AT1G69730.1	47	48	36	15	13	3	12.5033	11.7721	9.27284	3.60616	3.09377	0.796608	0.000966897	-1.6521	down
AT1G69770.1	41	48	38	15	9	17	10.9071	11.7721	9.78799	3.60616	2.14184	4.51411	0.00550956	-1.21696	down
AT1G69830.1	134	147	152	232	280	243	35.6476	36.0522	39.152	55.7753	66.6351	64.5253	3.94142e-14	1.15997	up
AT1G69880.1	238	313	267	49	34	18	63.3144	76.7642	68.7735	11.7801	8.09141	4.77965	2.72192e-26	-2.6285	down
AT1G69890.1	43	63	51	102	114	100	11.4392	15.4509	13.1365	24.5219	27.13	26.5536	3.55543e-09	1.36006	up
AT1G69900.1	173	151	164	55	53	53	46.0226	37.0332	42.2429	13.2226	12.6131	14.0734	5.00451e-09	-1.22854	down
AT1G69935.1	40	44	29	85	83	82	10.6411	10.7911	7.46979	20.4349	19.7526	21.774	1.75676e-08	1.48925	up
AT1G70000.1	63	58	63	16	18	19	16.7597	14.2247	16.2275	3.84657	4.28369	5.04519	6.96025e-05	-1.39855	down
AT1G70000.2	75	86	80	19	12	11	19.952	21.0918	20.6063	4.5678	2.85579	2.9209	7.78429e-10	-2.10897	down
AT1G70100.1	0	8	1	15	16	26	0	1.96202	0.257579	3.60616	3.80772	6.90394	0.000564207	2.67295	up
AT1G70100.4	33	32	25	73	83	62	8.77889	7.8481	6.43947	17.55	19.7526	16.4632	1.93307e-08	1.60838	up
AT1G70140.1	58	79	76	9	9	13	15.4296	19.375	19.576	2.1637	2.14184	3.45197	1.88235e-09	-2.33441	down
AT1G70170.1	34	47	54	11	9	5	9.04491	11.5269	13.9093	2.64452	2.14184	1.32768	2.44468e-05	-1.98543	down
AT1G70260.1	96	75	94	0	1	0	25.5386	18.394	24.2124	0	0.237983	0	1.02125e-14	-6.02156	down
AT1G70270.1	15	17	11	0	1	2	3.9904	4.1693	2.83337	0	0.237983	0.531072	0.000799131	-2.86484	down
AT1G70290.1	48	47	52	269	242	247	12.7693	11.5269	13.3941	64.6705	57.5918	65.5874	2.48526e-51	2.70949	up
AT1G70410.2	12	7	2	144	175	133	3.19232	1.71677	0.515158	34.6191	41.6469	35.3163	5.27721e-37	4.64118	up
AT1G70420.1	30	18	24	57	56	59	7.98081	4.41455	6.18189	13.7034	13.327	15.6666	2.69567e-06	1.58028	up
AT1G70460.1	34	43	50	4	3	4	9.04491	10.5459	12.8789	0.961642	0.713948	1.06214	6.38151e-08	-2.95864	down
AT1G70520.1	243	266	256	89	96	96	64.6445	65.2373	65.9402	21.3965	22.8463	25.4915	2.43414e-11	-1.07482	down
AT1G70580.1	49	51	32	74	70	67	13.0353	12.5079	8.24252	17.7904	16.6588	17.7909	0.000340816	1.02433	up
AT1G70720.1	13	13	11	3	1	1	3.45835	3.18829	2.83337	0.721232	0.237983	0.265536	0.00759896	-2.1813	down
AT1G70750.1	49	59	52	20	23	18	13.0353	14.4699	13.3941	4.80821	5.4736	4.77965	0.00520725	-1.00511	down
AT1G70760.1	26	41	29	426	408	432	6.9167	10.0554	7.46979	102.415	97.0969	114.712	8.52924e-98	4.05467	up
AT1G70780.1	378	464	452	1203	1250	1072	100.558	113.797	116.426	289.214	297.478	284.655	7.01897e-107	1.80519	up
AT1G70790.2	16	25	18	47	39	26	4.25643	6.13133	4.63642	11.2993	9.28132	6.90394	0.00258443	1.24137	up
AT1G70810.1	242	309	341	100	96	62	64.3785	75.7832	87.8344	24.0411	22.8463	16.4632	1.48564e-12	-1.42209	down
AT1G70820.1	26	31	29	258	250	214	6.9167	7.60284	7.46979	62.0259	59.4956	56.8247	8.70994e-61	3.39768	up
AT1G70850.1	842	1057	1073	1693	1650	1397	223.995	259.232	276.382	407.015	392.671	370.954	1.38207e-32	1.0326	up
AT1G70880.1	1	1	2	12	17	18	0.266027	0.245253	0.515158	2.88493	4.0457	4.77965	1.03084e-05	3.37426	up
AT1G70940.1	59	57	47	97	98	73	15.6956	13.9794	12.1062	23.3198	23.3223	19.3841	1.3322e-05	1.06238	up
AT1G70990.1	117	157	133	20	18	19	31.1251	38.5047	34.258	4.80821	4.28369	5.04519	3.08121e-18	-2.42927	down
AT1G71015.1	61	54	48	4	3	8	16.2276	13.2437	12.3638	0.961642	0.713948	2.12429	3.78416e-09	-2.91055	down
AT1G71030.1	52	55	57	534	541	504	13.8334	13.4889	14.682	128.379	128.749	133.83	1.79783e-129	3.61197	up
AT1G71400.1	63	58	66	13	12	13	16.7597	14.2247	17.0002	3.12534	2.85579	3.45197	3.99293e-07	-1.8839	down
AT1G71500.1	149	217	190	794	864	757	39.638	53.2199	48.94	190.886	205.617	201.011	6.52395e-99	2.47648	up
AT1G71692.1	18	30	36	6	7	8	4.78848	7.35759	9.27284	1.44246	1.66588	2.12429	0.00626701	-1.53524	down
AT1G71695.1	610	751	558	1085	1086	1048	162.276	184.185	143.729	260.846	258.449	278.282	4.75442e-31	1.11069	up
AT1G71696.2	8	20	13	0	0	3	2.12821	4.90506	3.34852	0	0	0.796608	0.00280841	-2.71422	down
AT1G71697.1	337	343	364	97	98	110	89.651	84.1218	93.7587	23.3198	23.3223	29.209	1.16497e-19	-1.40355	down
AT1G71710.2	3	1	3	20	20	14	0.798081	0.245253	0.772736	4.80821	4.75965	3.71751	1.15258e-05	2.96499	up
AT1G71740.1	23	32	38	2	0	2	6.11862	7.8481	9.78799	0.480821	0	0.531072	4.82481e-07	-3.63863	down
AT1G71880.1	931	1011	933	397	357	318	247.671	247.951	240.321	95.443	84.9598	84.4405	4.57301e-36	-1.06108	down
AT1G71910.1	30	36	27	4	5	8	7.98081	8.82911	6.95463	0.961642	1.18991	2.12429	0.000285962	-1.95846	down
AT1G71970.1	57	65	48	160	175	171	15.1635	15.9414	12.3638	38.4657	41.6469	45.4067	3.38038e-22	1.92374	up
AT1G71980.1	154	157	123	268	237	210	40.9681	38.5047	31.6822	64.43	56.4019	55.7626	7.82665e-12	1.07444	up
AT1G72120.1	17	37	29	9	7	5	4.52246	9.07436	7.46979	2.1637	1.66588	1.32768	0.00771249	-1.52152	down
AT1G72125.1	12	16	11	1	2	2	3.19232	3.92405	2.83337	0.240411	0.475965	0.531072	0.00530822	-2.24213	down
AT1G72150.1	746	746	635	1734	1863	1704	198.456	182.959	163.563	416.872	443.361	452.474	2.15717e-97	1.67839	up
AT1G72180.1	91	91	81	184	187	181	24.2084	22.318	20.8639	44.2356	44.5027	48.062	4.7472e-17	1.4243	up
AT1G72220.1	22	17	27	1	2	2	5.85259	4.1693	6.95463	0.240411	0.475965	0.531072	5.15007e-05	-2.95573	down
AT1G72230.1	92	99	127	9	23	17	24.4745	24.28	32.7125	2.1637	5.4736	4.51411	1.2649e-10	-2.27282	down
AT1G72240.1	35	29	41	6	8	6	9.31094	7.11234	10.5607	1.44246	1.90386	1.59322	0.000135192	-1.93183	down
AT1G72280.1	47	54	54	7	9	5	12.5033	13.2437	13.9093	1.68287	2.14184	1.32768	5.4203e-08	-2.42017	down
AT1G72410.1	42	62	49	89	95	84	11.1731	15.2057	12.6214	21.3965	22.6083	22.305	2.02268e-06	1.1604	up
AT1G72520.1	32	43	24	9	6	7	8.51286	10.5459	6.18189	2.1637	1.4279	1.85875	0.000998006	-1.70989	down
AT1G72610.1	1114	1210	971	7768	7366	6772	296.354	296.756	250.109	1867.51	1752.98	1798.21	0	3.09237	up
AT1G72640.2	29	36	35	128	130	114	7.71478	8.82911	9.01526	30.7726	30.9377	30.2711	2.4358e-22	2.23194	up
AT1G72645.1	81	74	69	361	392	353	21.5482	18.1487	17.7729	86.7882	93.2892	93.7343	1.44043e-68	2.65256	up
AT1G72730.1	33	44	34	7	12	6	8.77889	10.7911	8.75768	1.68287	2.85579	1.59322	0.000411303	-1.70808	down
AT1G72800.1	114	140	108	49	46	43	30.3271	34.3354	27.8185	11.7801	10.9472	11.4181	1.74197e-05	-1.01628	down
AT1G72820.1	207	188	176	339	361	335	55.0676	46.1076	45.3339	81.4992	85.9117	88.9546	3.59592e-20	1.21566	up
AT1G72830.1	68	74	86	8	12	0	18.0898	18.1487	22.1518	1.92328	2.85579	0	8.58889e-10	-3.00469	down
AT1G73040.1	11	25	26	5	3	0	2.9263	6.13133	6.69705	1.20205	0.713948	0	0.00222331	-2.30123	down
AT1G73120.1	61	65	47	578	604	536	16.2276	15.9414	12.1062	138.957	143.741	142.327	2.2876e-134	3.65652	up
AT1G73260.1	508	441	430	2477	2181	1923	135.142	108.157	110.759	595.497	519.04	510.626	6.21347e-179	2.60618	up
AT1G73390.1	17	17	15	38	25	35	4.52246	4.1693	3.86368	9.1356	5.94956	9.29376	0.00195582	1.31947	up
AT1G73470.2	16	7	17	41	22	25	4.25643	1.71677	4.37884	9.85684	5.23562	6.6384	0.00668519	1.41115	up
AT1G73470.3	13	19	27	50	55	45	3.45835	4.65981	6.95463	12.0205	13.089	11.9491	7.40204e-06	1.66109	up
AT1G73480.1	20	19	23	46	45	31	5.32054	4.65981	5.92431	11.0589	10.7092	8.23162	0.00056339	1.29534	up
AT1G73580.1	4	10	9	0	0	0	1.06411	2.45253	2.31821	0	0	0	0.00175671	-3.4887	down
AT1G73600.2	461	534	577	14	13	7	122.638	130.965	148.623	3.36575	3.09377	1.85875	9.8427e-77	-5.08287	down
AT1G73620.1	80	112	94	23	18	14	21.2821	27.4683	24.2124	5.52944	4.28369	3.71751	3.73317e-10	-1.97584	down
AT1G73655.1	139	176	157	491	499	461	36.9777	43.1645	40.4399	118.042	118.753	122.412	1.57969e-62	1.97807	up
AT1G73660.1	82	66	74	204	186	140	21.8142	16.1867	19.0608	49.0438	44.2648	37.1751	1.00005e-15	1.59514	up
AT1G73750.1	5	0	4	20	7	15	1.33013	0	1.03032	4.80821	1.66588	3.98304	0.00467981	2.24055	up
AT1G73805.1	22	52	56	10	13	6	5.85259	12.7532	14.4244	2.40411	3.09377	1.59322	0.00135359	-1.70651	down
AT1G73810.1	23	29	32	1	0	3	6.11862	7.11234	8.24252	0.240411	0	0.796608	1.71994e-06	-3.49773	down
AT1G73830.2	79	74	54	121	130	101	21.0161	18.1487	13.9093	29.0897	30.9377	26.8191	7.60952e-07	1.11372	up
AT1G73870.1	11	6	4	28	31	30	2.9263	1.47152	1.03032	6.7315	7.37746	7.96608	5.00692e-06	2.31563	up
AT1G74010.1	57	55	80	18	17	14	15.1635	13.4889	20.6063	4.32739	4.0457	3.71751	2.76411e-05	-1.56959	down
AT1G74030.1	165	158	158	30	31	39	43.8944	38.75	40.6975	7.21232	7.37746	10.3559	1.51411e-15	-1.87865	down
AT1G74070.1	17	12	21	80	71	64	4.52246	2.94304	5.40915	19.2328	16.8968	16.9943	2.56852e-13	2.4045	up
AT1G74090.1	180	199	186	74	66	44	47.8848	48.8053	47.9097	17.7904	15.7068	11.6836	6.18553e-10	-1.25189	down
AT1G74100.1	441	489	556	198	172	176	117.318	119.929	143.214	47.6013	40.933	46.7344	6.72381e-15	-1.07832	down
AT1G74210.1	142	172	182	68	69	47	37.7758	42.1835	46.8793	16.3479	16.4208	12.4802	8.65751e-07	-1.06304	down
AT1G74280.1	62	107	79	38	37	20	16.4937	26.2421	20.3487	9.1356	8.80535	5.31072	0.0039406	-1.00332	down
AT1G74310.1	18	20	22	52	39	27	4.78848	4.90506	5.66673	12.5014	9.28132	7.16948	0.00140293	1.28704	up
AT1G74370.1	41	48	37	121	125	133	10.9071	11.7721	9.53042	29.0897	29.7478	35.3163	1.50195e-17	1.93516	up
AT1G74410.1	140	143	130	50	45	35	37.2438	35.0712	33.4852	12.0205	10.7092	9.29376	8.72828e-09	-1.29599	down
AT1G74458.1	52	50	46	136	115	97	13.8334	12.2627	11.8486	32.6958	27.368	25.757	2.25401e-12	1.57395	up
AT1G74460.1	131	130	175	7	6	5	34.8495	31.8829	45.0763	1.68287	1.4279	1.32768	5.67944e-25	-4.08968	down
AT1G74470.1	510	558	479	2165	2410	2082	135.674	136.851	123.38	520.489	573.538	552.846	3.10072e-235	2.46539	up
AT1G74500.1	56	54	51	4	3	5	14.8975	13.2437	13.1365	0.961642	0.713948	1.32768	2.42047e-10	-3.19222	down
AT1G74650.1	67	56	54	24	24	13	17.8238	13.7342	13.9093	5.76985	5.71158	3.45197	0.00189313	-1.1558	down
AT1G74670.1	311	292	230	632	808	689	82.7344	71.6139	59.2431	151.94	192.29	182.954	3.43015e-33	1.71024	up
AT1G74710.1	55	56	71	18	16	11	14.6315	13.7342	18.2881	4.32739	3.80772	2.9209	1.76819e-05	-1.61495	down
AT1G74730.1	251	313	280	605	624	541	66.7727	76.7642	72.1221	145.448	148.501	143.655	2.54549e-45	1.42799	up
AT1G74880.1	26	29	21	273	274	234	6.9167	7.11234	5.40915	65.6321	65.2072	62.1355	2.25891e-67	3.685	up
AT1G74910.3	0	0	0	283	153	300	0	0	0	68.0362	36.4113	79.6608	2.36251e-26	8.32613	up
AT1G74960.1	16	8	7	23	26	22	4.25643	1.96202	1.80305	5.52944	6.18755	5.84179	0.00492691	1.47312	up
AT1G74970.1	466	458	435	1166	1246	1043	123.969	112.326	112.047	280.319	296.526	276.954	9.00234e-103	1.70402	up
AT1G75100.1	8	9	10	20	22	25	2.12821	2.20728	2.57579	4.80821	5.23562	6.6384	0.00163324	1.59794	up
AT1G75160.1	12	6	12	1	1	1	3.19232	1.47152	3.09095	0.240411	0.237983	0.265536	0.00904025	-2.40373	down
AT1G75170.1	200	206	149	66	75	56	53.2054	50.5221	38.3792	15.8671	17.8487	14.87	1.80622e-07	-1.12336	down
AT1G75180.1	15	8	14	29	28	20	3.9904	1.96202	3.6061	6.97191	6.66351	5.31072	0.00591803	1.34583	up
AT1G75190.1	68	67	55	174	210	182	18.0898	16.432	14.1668	41.8314	49.9763	48.3276	9.86456e-24	1.92317	up
AT1G75220.1	285	282	286	585	642	545	75.8177	69.1613	73.6675	140.64	152.785	144.717	5.22216e-44	1.41245	up
AT1G75350.1	345	354	408	839	883	753	91.7793	86.8196	105.092	201.705	210.139	199.949	2.49623e-55	1.51765	up
AT1G75388.1	145	171	183	66	43	39	38.5739	41.9383	47.1369	15.8671	10.2332	10.3559	4.74784e-09	-1.38086	down
AT1G75450.1	23	25	24	3	0	0	6.11862	6.13133	6.18189	0.721232	0	0	5.58293e-06	-3.57297	down
AT1G75460.1	23	30	31	307	302	311	6.11862	7.35759	7.98494	73.8061	71.8707	82.5817	1.29559e-75	3.78293	up
AT1G75490.1	9	10	11	32	38	21	2.39424	2.45253	2.83337	7.69314	9.04334	5.57626	6.4175e-05	1.86983	up
AT1G75540.1	156	176	155	313	319	321	41.5002	43.1645	39.9247	75.2485	75.9164	85.2371	2.28462e-23	1.32896	up
AT1G75690.1	117	124	103	832	881	721	31.1251	30.4114	26.5306	200.022	209.663	191.452	2.49063e-165	3.17381	up
AT1G75750.1	1366	1405	1427	6149	6065	5447	363.393	344.58	367.565	1478.28	1443.36	1446.38	0	2.43239	up
AT1G75770.1	10	16	16	33	36	29	2.66027	3.92405	4.12126	7.93355	8.56737	7.70055	0.000301928	1.53083	up
AT1G75780.1	172	172	158	60	44	47	45.7566	42.1835	40.6975	14.4246	10.4712	12.4802	9.29064e-11	-1.36032	down
AT1G75820.1	58	74	56	141	127	115	15.4296	18.1487	14.4244	33.8979	30.2238	30.5367	1.98236e-11	1.37699	up
AT1G75900.1	37	52	35	70	114	68	9.84299	12.7532	9.01526	16.8287	27.13	18.0565	1.14214e-05	1.35991	up
AT1G75960.1	6	5	10	62	74	64	1.59616	1.22627	2.57579	14.9055	17.6107	16.9943	1.69901e-17	3.47964	up
AT1G76010.1	77	123	131	234	244	136	20.4841	30.1661	33.7428	56.2561	58.0677	36.1129	1.26251e-06	1.22848	up
AT1G76040.2	64	90	60	28	21	19	17.0257	22.0728	15.4547	6.7315	4.99763	5.04519	0.000219386	-1.26212	down
AT1G76080.1	582	691	596	2203	2227	1853	154.828	169.47	153.517	529.625	529.987	492.038	4.09562e-208	2.108	up
AT1G76100.1	215	243	219	702	616	652	57.1958	59.5965	56.4098	168.768	146.597	173.13	1.08582e-69	1.90055	up
AT1G76110.1	7	14	13	33	37	25	1.86219	3.43354	3.34852	7.93355	8.80535	6.6384	0.000101382	1.76849	up
AT1G76350.1	47	71	57	7	6	6	12.5033	17.413	14.682	1.68287	1.4279	1.59322	1.8695e-09	-2.71353	down
AT1G76410.1	37	51	34	274	246	248	9.84299	12.5079	8.75768	65.8725	58.5437	65.853	2.418e-54	2.99454	up
AT1G76450.1	126	144	152	359	384	369	33.5194	35.3164	39.152	86.3074	91.3853	97.9828	3.62743e-38	1.75542	up
AT1G76460.1	28	23	13	55	50	60	7.44875	5.64082	3.34852	13.2226	11.8991	15.9322	5.10134e-06	1.68633	up
AT1G76490.1	214	213	182	438	537	423	56.9297	52.2389	46.8793	105.3	127.797	112.322	3.27263e-31	1.5541	up
AT1G76590.1	21	16	17	88	93	76	5.58656	3.92405	4.37884	21.1561	22.1324	20.1807	9.31367e-18	2.55944	up
AT1G76650.1	168	229	332	65	76	79	44.6925	56.1629	85.5162	15.6267	18.0867	20.9774	9.32623e-07	-1.34062	down
AT1G76730.1	19	33	27	55	66	65	5.05451	8.09335	6.95463	13.2226	15.7068	17.2598	1.26251e-06	1.57265	up
AT1G76760.1	53	67	58	25	15	26	14.0994	16.432	14.9396	6.01027	3.56974	6.90394	0.00528214	-1.03551	down
AT1G76790.1	294	272	346	77	57	65	78.2119	66.7088	89.1223	18.5116	13.565	17.2598	4.97318e-21	-1.82257	down
AT1G76930.2	199	186	211	46	43	37	52.9393	45.6171	54.3491	11.0589	10.2332	9.82484	3.09771e-19	-1.86642	down
AT1G76960.1	33	61	88	2	1	2	8.77889	14.9604	22.6669	0.480821	0.237983	0.531072	1.25705e-10	-4.2871	down
AT1G76970.1	45	46	59	13	13	9	11.9712	11.2816	15.1971	3.12534	3.09377	2.38983	4.58779e-05	-1.68497	down
AT1G76980.2	109	120	111	19	30	29	28.9969	29.4304	28.5912	4.5678	7.13948	7.70055	4.88007e-10	-1.72913	down
AT1G76990.2	7	13	9	1	0	0	1.86219	3.18829	2.31821	0.240411	0	0	0.00189839	-3.14691	down
AT1G76990.3	265	282	298	54	70	66	70.4971	69.1613	76.7585	12.9822	16.6588	17.5254	6.10883e-23	-1.77644	down
AT1G77060.1	50	50	55	161	139	103	13.3013	12.2627	14.1668	38.7061	33.0796	27.3502	2.3886e-14	1.71402	up
AT1G77090.1	34	44	33	75	98	96	9.04491	10.7911	8.5001	18.0308	23.3223	25.4915	2.92016e-09	1.62238	up
AT1G77120.1	290	496	729	57	61	49	77.1478	121.645	187.775	13.7034	14.5169	13.0113	8.07024e-22	-2.76934	down
AT1G77210.2	23	21	14	60	81	72	6.11862	5.15031	3.6061	14.4246	19.2766	19.1186	4.05636e-11	2.19108	up
AT1G77330.1	72	78	57	27	30	20	19.1539	19.1297	14.682	6.49109	7.13948	5.31072	0.00154031	-1.04617	down
AT1G77420.1	144	146	147	48	56	55	38.3079	35.8069	37.8641	11.5397	13.327	14.6045	4.11922e-07	-1.08489	down
AT1G77490.1	59	50	48	242	235	193	15.6956	12.2627	12.3638	58.1794	55.9259	51.2485	1.3156e-39	2.43286	up
AT1G77520.1	38	52	70	8	5	4	10.109	12.7532	18.0305	1.92328	1.18991	1.06214	5.6938e-08	-2.72329	down
AT1G77600.2	0	7	0	10	14	19	0	1.71677	0	2.40411	3.33176	5.04519	0.0037389	2.53049	up
AT1G77640.1	123	136	147	37	49	52	32.7213	33.3544	37.8641	8.89519	11.6611	13.8079	1.51984e-06	-1.17541	down
AT1G77760.1	54	53	55	643	658	594	14.3655	12.9984	14.1668	154.584	156.593	157.728	7.90596e-159	3.89167	up
AT1G77770.1	116	100	135	40	52	42	30.8591	24.5253	34.7731	9.61642	12.3751	11.1525	0.000123738	-1.01684	down
AT1G77920.1	447	467	469	96	72	88	118.914	114.533	120.804	23.0794	17.1347	23.3672	1.24987e-43	-2.0609	down
AT1G78020.1	327	351	336	93	81	76	86.9908	86.0838	86.5465	22.3582	19.2766	20.1807	3.13349e-28	-1.65114	down
AT1G78060.1	145	141	164	65	46	48	38.5739	34.5807	42.2429	15.6267	10.9472	12.7457	5.72289e-07	-1.13124	down
AT1G78100.1	263	306	329	116	114	94	69.9651	75.0474	84.7434	27.8876	27.13	24.9604	5.03441e-12	-1.10478	down
AT1G78120.1	55	48	56	7	5	11	14.6315	11.7721	14.4244	1.68287	1.18991	2.9209	2.67726e-07	-2.32005	down
AT1G78140.1	101	126	116	215	189	164	26.8687	30.9019	29.8791	51.6883	44.9787	43.5479	8.1243e-11	1.08181	up
AT1G78170.1	98	105	77	146	174	148	26.0706	25.7516	19.8336	35.1	41.409	39.2993	1.5912e-08	1.09669	up
AT1G78180.1	27	38	30	68	66	49	7.18273	9.31961	7.72736	16.3479	15.7068	13.0113	2.4462e-05	1.28236	up
AT1G78290.2	4	5	10	69	72	60	1.06411	1.22627	2.57579	16.5883	17.1347	15.9322	5.90099e-18	3.61583	up
AT1G78290.3	0	1	2	32	31	24	0	0.245253	0.515158	7.69314	7.37746	6.37287	6.22986e-10	4.48403	up
AT1G78370.1	534	563	546	151	146	147	142.058	138.077	140.638	36.302	34.7455	39.0338	2.40885e-38	-1.52042	down
AT1G78410.1	38	39	42	3	3	2	10.109	9.56487	10.8183	0.721232	0.713948	0.531072	2.42007e-08	-3.26344	down
AT1G78570.1	184	202	209	76	66	81	48.9489	49.5411	53.834	18.2712	15.7068	21.5084	4.75727e-08	-1.04273	down
AT1G78630.1	765	816	703	2045	2105	1862	203.511	200.126	181.078	491.64	500.953	494.428	1.29409e-167	1.75681	up
AT1G78660.2	135	182	167	71	66	49	35.9136	44.636	43.0157	17.0692	15.7068	13.0113	2.98682e-06	-1.01035	down
AT1G78780.1	11	11	5	2	0	0	2.9263	2.69778	1.28789	0.480821	0	0	0.00980957	-2.57787	down
AT1G78820.1	40	38	23	132	126	119	10.6411	9.31961	5.92431	31.7342	29.9858	31.5988	1.22828e-19	2.23347	up
AT1G78830.1	259	274	226	707	676	615	68.901	67.1993	58.2128	169.97	160.876	163.305	1.37596e-69	1.75422	up
AT1G78860.1	11	12	7	1	1	0	2.9263	2.94304	1.80305	0.240411	0.237983	0	0.00389794	-2.75211	down
AT1G78915.1	23	18	20	75	64	68	6.11862	4.41455	5.15158	18.0308	15.2309	18.0565	2.06725e-11	2.08112	up
AT1G78995.1	44	53	55	106	127	108	11.7052	12.9984	14.1668	25.4835	30.2238	28.6779	1.59692e-11	1.51335	up
AT1G79040.1	11285	12778	10843	45076	50013	43822	3002.11	3133.84	2792.93	10836.7	11902.2	11636.3	5.11421e-278	2.35487	up
AT1G79110.2	27	45	39	6	10	4	7.18273	11.0364	10.0456	1.44246	2.37983	1.06214	0.000118659	-1.99819	down
AT1G79180.1	71	79	83	6	7	8	18.8879	19.375	21.379	1.44246	1.66588	2.12429	1.6785e-13	-2.99618	down
AT1G79250.1	4	5	6	0	0	0	1.06411	1.22627	1.54547	0	0	0	0.00911899	-3.0427	down
AT1G79310.1	9	10	17	0	1	2	2.39424	2.45253	4.37884	0	0.237983	0.531072	0.00357649	-2.61351	down
AT1G79320.1	137	159	168	10	6	6	36.4457	38.9952	43.2732	2.40411	1.4279	1.59322	5.69739e-28	-3.92208	down
AT1G79330.1	12	14	10	1	2	1	3.19232	3.43354	2.57579	0.240411	0.475965	0.265536	0.00479304	-2.37572	down
AT1G79510.1	47	37	37	88	91	67	12.5033	9.07436	9.53042	21.1561	21.6564	17.7909	3.43257e-07	1.35927	up
AT1G79530.1	206	235	217	66	55	46	54.8015	57.6345	55.8946	15.8671	13.089	12.2147	1.05877e-17	-1.60651	down
AT1G79610.1	59	62	69	27	19	20	15.6956	15.2057	17.7729	6.49109	4.52167	5.31072	0.000795725	-1.14108	down
AT1G79680.1	24	18	15	4	0	2	6.38464	4.41455	3.86368	0.961642	0	0.531072	0.000761999	-2.53777	down
AT1G79700.2	37	51	41	117	144	137	9.84299	12.5079	10.5607	28.128	34.2695	36.3784	1.81875e-17	1.97152	up
AT1G79760.1	13	16	19	1	3	3	3.45835	3.92405	4.894	0.240411	0.713948	0.796608	0.00365179	-2.1427	down
AT1G79790.1	62	63	48	209	247	167	16.4937	15.4509	12.3638	50.2458	58.7817	44.3445	4.4103e-27	2.18636	up
AT1G79850.1	1008	1127	1045	2552	2591	2359	268.155	276.4	269.17	613.528	616.613	626.4	8.31276e-196	1.59998	up
AT1G79860.1	10	12	11	1	0	2	2.66027	2.94304	2.83337	0.240411	0	0.531072	0.00481128	-2.52246	down
AT1G80010.1	55	69	56	31	26	12	14.6315	16.9225	14.4244	7.45273	6.18755	3.18643	0.00998414	-1.00455	down
AT1G80120.1	17	24	24	1	0	1	4.52246	5.88607	6.18189	0.240411	0	0.265536	6.97342e-06	-3.76646	down
AT1G80130.1	945	977	1023	35	23	30	251.395	239.612	263.503	8.41437	5.4736	7.96608	1.35656e-151	-4.67017	down
AT1G80133.1	8	5	7	0	0	0	2.12821	1.22627	1.80305	0	0	0	0.00282796	-3.36567	down
AT1G80180.1	534	544	481	1835	1901	1611	142.058	133.418	123.895	441.153	452.405	427.779	2.03053e-201	2.13631	up
AT1G80210.1	52	50	63	18	23	10	13.8334	12.2627	16.2275	4.32739	5.4736	2.65536	0.00112897	-1.30322	down
AT1G80240.1	51	70	61	22	12	18	13.5674	17.1677	15.7123	5.28903	2.85579	4.77965	0.000185379	-1.40249	down
AT1G80300.1	188	248	232	89	78	67	50.013	60.8227	59.7583	21.3965	18.5626	17.7909	7.02473e-10	-1.14372	down
AT1G80380.2	134	233	178	266	306	322	35.6476	57.144	45.849	63.9492	72.8227	85.5026	7.77727e-08	1.08108	up
AT1G80380.3	135	19	49	778	712	628	35.9136	4.65981	12.6214	187.039	169.444	166.757	4.99911e-06	3.29333	up
AT1G80420.1	11	16	14	36	31	22	2.9263	3.92405	3.6061	8.65478	7.37746	5.84179	0.00143398	1.42037	up
AT1G80440.1	106	101	65	1440	1576	1437	28.1988	24.7706	16.7426	346.191	375.06	381.575	9.09693e-258	4.38115	up
AT1G80650.1	50	44	41	86	72	62	13.3013	10.7911	10.5607	20.6753	17.1347	16.4632	0.000104663	1.0465	up
AT1G80690.1	39	31	45	14	10	10	10.375	7.60284	11.591	3.36575	2.37983	2.65536	0.00335469	-1.34862	down
AT1G80730.1	7	9	9	0	1	0	1.86219	2.20728	2.31821	0	0.237983	0	0.00389304	-2.97759	down
AT1G80760.1	32	30	37	9	9	9	8.51286	7.35759	9.53042	2.1637	2.14184	2.38983	0.00249338	-1.44913	down
AT1G80770.1	74	101	105	135	143	168	19.686	24.7706	27.0458	32.4554	34.0315	44.6101	3.20077e-06	1.03341	up
AT1G80840.1	78	123	113	26	13	36	20.7501	30.1661	29.1064	6.25068	3.09377	9.5593	1.53872e-05	-1.6365	down
AT1G80910.1	92	107	119	38	32	34	24.4745	26.2421	30.6519	9.1356	7.61544	9.02823	3.04465e-06	-1.23288	down
AT1G80920.1	366	380	348	1561	1622	1445	97.3658	93.1961	89.6374	375.281	386.008	383.7	1.3813e-245	2.43991	up
AT2G01110.1	229	254	258	517	489	450	60.9201	62.2943	66.4553	124.292	116.373	119.491	1.24698e-36	1.33268	up
AT2G01150.1	119	134	151	43	31	50	31.6572	32.8639	38.8944	10.3377	7.37746	13.2768	6.11976e-07	-1.31699	down
AT2G01290.1	29	16	15	43	46	33	7.71478	3.92405	3.86368	10.3377	10.9472	8.76269	0.00138448	1.33089	up
AT2G01320.1	17	29	10	49	41	34	4.52246	7.11234	2.57579	11.7801	9.75728	9.02823	0.000856176	1.4577	up
AT2G01430.1	7	6	12	0	0	0	1.86219	1.47152	3.09095	0	0	0	0.00107469	-3.6026	down
AT2G01530.1	298	277	336	856	699	598	79.276	67.9351	86.5465	205.791	166.35	158.791	1.93115e-34	1.58878	up
AT2G01590.1	35	37	40	99	99	84	9.31094	9.07436	10.3032	23.8007	23.5603	22.305	6.02056e-12	1.67151	up
AT2G01620.1	43	60	60	107	125	95	11.4392	14.7152	15.4547	25.7239	29.7478	25.2259	6.182e-09	1.35128	up
AT2G01660.1	77	85	87	29	13	17	20.4841	20.8465	22.4094	6.97191	3.09377	4.51411	8.64693e-07	-1.67925	down
AT2G01755.1	35	40	33	106	123	96	9.31094	9.81012	8.5001	25.4835	29.2719	25.4915	8.92008e-16	1.92726	up
AT2G01830.1	34	40	48	14	9	10	9.04491	9.81012	12.3638	3.36575	2.14184	2.65536	0.00104988	-1.46871	down
AT2G01850.1	231	257	219	568	541	525	61.4522	63.03	56.4098	136.553	128.749	139.406	6.13312e-51	1.56836	up
AT2G01860.1	36	45	39	118	98	104	9.57697	11.0364	10.0456	28.3685	23.3223	27.6158	8.84628e-14	1.75845	up
AT2G01870.1	32	34	30	86	111	73	8.51286	8.3386	7.72736	20.6753	26.4161	19.3841	2.53893e-11	1.82159	up
AT2G01880.1	87	112	109	25	22	14	23.1443	27.4683	28.0761	6.01027	5.23562	3.71751	1.31755e-10	-1.94068	down
AT2G01918.1	3	2	2	33	24	41	0.798081	0.490506	0.515158	7.93355	5.71158	10.887	8.91479e-10	3.80226	up
AT2G01930.2	15	9	16	36	30	25	3.9904	2.20728	4.12126	8.65478	7.13948	6.6384	0.00110951	1.47809	up
AT2G02010.1	23	43	30	6	4	3	6.11862	10.5459	7.72736	1.44246	0.95193	0.796608	4.81037e-05	-2.34679	down
AT2G02070.1	46	56	50	90	85	84	12.2372	13.7342	12.8789	21.637	20.2285	22.305	2.41834e-06	1.12047	up
AT2G02410.2	17	25	23	38	37	32	4.52246	6.13133	5.92431	9.1356	8.80535	8.49716	0.00652538	1.05316	up
AT2G02500.1	44	59	48	97	94	74	11.7052	14.4699	12.3638	23.3198	22.3704	19.6497	1.98686e-06	1.15845	up
AT2G02570.2	26	26	35	52	51	36	6.9167	6.37658	9.01526	12.5014	12.1371	9.5593	0.00429751	1.00736	up
AT2G02580.1	47	46	52	2	2	2	12.5033	11.2816	13.3941	0.480821	0.475965	0.531072	2.01086e-10	-3.8629	down
AT2G02710.2	55	60	54	289	275	243	14.6315	14.7152	13.9093	69.4787	65.4452	64.5253	1.37364e-54	2.60029	up
AT2G02810.1	82	123	127	34	19	22	21.8142	30.1661	32.7125	8.17396	4.52167	5.84179	3.75755e-08	-1.74784	down
AT2G02850.1	35	47	41	4	3	2	9.31094	11.5269	10.5607	0.961642	0.713948	0.531072	2.84709e-08	-3.16446	down
AT2G02930.1	6	4	12	23	18	18	1.59616	0.981012	3.09095	5.52944	4.28369	4.77965	0.00430646	1.66416	up
AT2G02950.1	60	72	69	153	162	164	15.9616	17.6582	17.7729	36.7828	38.5532	43.5479	3.97405e-17	1.60663	up
AT2G02990.1	62	90	119	16	13	24	16.4937	22.0728	30.6519	3.84657	3.09377	6.37287	9.37848e-07	-1.91846	down
AT2G03050.1	13	17	15	29	24	27	3.45835	4.1693	3.86368	6.97191	5.71158	7.16948	0.00987614	1.15337	up
AT2G03090.1	64	59	82	17	11	12	17.0257	14.4699	21.1215	4.08698	2.61781	3.18643	3.20164e-07	-1.94234	down
AT2G03200.1	29	37	28	11	3	3	7.71478	9.07436	7.21221	2.64452	0.713948	0.796608	0.000646434	-1.97448	down
AT2G03310.1	57	69	64	145	139	125	15.1635	16.9225	16.485	34.8595	33.0796	33.192	6.32727e-14	1.45659	up
AT2G03370.1	8	11	14	0	0	0	2.12821	2.69778	3.6061	0	0	0	0.000213058	-3.94057	down
AT2G03420.1	18	19	14	60	85	54	4.78848	4.65981	3.6061	14.4246	20.2285	14.339	6.06963e-11	2.26505	up
AT2G03440.1	348	474	388	692	689	608	92.5773	116.25	99.9406	166.364	163.97	161.446	6.43608e-25	1.07874	up
AT2G03505.1	13	8	8	1	0	0	3.45835	1.96202	2.06063	0.240411	0	0	0.00186177	-3.154	down
AT2G03530.1	40	58	53	7	10	12	10.6411	14.2247	13.6517	1.68287	2.37983	3.18643	9.38531e-06	-1.93197	down
AT2G03590.1	15	15	17	0	2	0	3.9904	3.6788	4.37884	0	0.475965	0	0.000156887	-3.33838	down
AT2G03720.1	51	76	81	5	0	1	13.5674	18.6392	20.8639	1.20205	0	0.265536	8.71191e-13	-4.33127	down
AT2G03750.1	23	25	24	90	100	77	6.11862	6.13133	6.18189	21.637	23.7983	20.4463	7.21945e-16	2.21465	up
AT2G03810.2	25	32	24	3	8	7	6.65067	7.8481	6.18189	0.721232	1.90386	1.85875	0.00276345	-1.68966	down
AT2G03830.1	12	14	18	0	1	3	3.19232	3.43354	4.63642	0	0.237983	0.796608	0.00168635	-2.60525	down
AT2G03890.1	282	310	260	478	522	485	75.0196	76.0284	66.9705	114.916	124.227	128.785	1.54096e-25	1.16314	up
AT2G04040.1	59	43	51	79	105	81	15.6956	10.5459	13.1365	18.9924	24.9882	21.5084	2.11924e-05	1.1348	up
AT2G04100.1	48	62	59	14	14	14	12.7693	15.2057	15.1971	3.36575	3.33176	3.71751	2.13159e-05	-1.59812	down
AT2G04270.1	5	11	2	25	20	21	1.33013	2.69778	0.515158	6.01027	4.75965	5.57626	0.000428972	2.08945	up
AT2G04400.1	252	281	274	111	91	87	67.0388	68.9161	70.5766	26.6856	21.6564	23.1016	2.07367e-12	-1.11495	down
AT2G04450.1	10	15	15	2	0	0	2.66027	3.6788	3.86368	0.480821	0	0	0.000648804	-3.115	down
AT2G04495.1	63	106	98	1	4	3	16.7597	25.9968	25.2427	0.240411	0.95193	0.796608	7.41228e-16	-4.3642	down
AT2G04515.1	94	102	107	3	2	1	25.0065	25.0158	27.5609	0.721232	0.475965	0.265536	9.53962e-19	-4.89484	down
AT2G04680.1	6	16	10	0	0	1	1.59616	3.92405	2.57579	0	0	0.265536	0.00137356	-3.22629	down
AT2G04690.2	232	233	216	445	542	406	61.7182	57.144	55.637	106.983	128.987	107.808	5.07293e-27	1.38713	up
AT2G04700.1	626	665	680	1380	1516	1349	166.533	163.093	175.154	331.767	360.782	358.208	3.34228e-86	1.46769	up
AT2G04780.1	398	488	439	132	148	122	105.879	119.683	113.077	31.7342	35.2214	32.3954	6.42792e-24	-1.3524	down
AT2G04790.2	6	5	9	29	36	34	1.59616	1.22627	2.31821	6.97191	8.56737	9.02823	1.63057e-07	2.53945	up
AT2G04790.3	2	4	1	13	18	5	0.532054	0.981012	0.257579	3.12534	4.28369	1.32768	0.00323373	2.35135	up
AT2G05070.1	291	300	252	1536	1781	1418	77.4138	73.5759	64.9099	369.271	423.847	376.53	3.13915e-191	2.84484	up
AT2G05100.1	426	466	412	2238	2389	2133	113.327	114.288	106.122	538.039	568.54	566.389	0	2.73416	up
AT2G05260.1	68	108	98	30	32	23	18.0898	26.4873	25.2427	7.21232	7.61544	6.10733	2.39548e-05	-1.3014	down
AT2G05310.1	101	101	61	464	540	448	26.8687	24.7706	15.7123	111.551	128.511	118.96	1.28921e-59	2.80943	up
AT2G05380.1	3008	2945	2376	26746	28210	24971	800.209	722.27	612.007	6430.02	6713.49	6630.7	0	3.61878	up
AT2G05540.1	60	64	43	1123	1305	1180	15.9616	15.6962	11.0759	269.981	310.567	313.333	1.41787e-230	4.7753	up
AT2G05620.1	127	132	139	357	420	329	33.7854	32.3734	35.8035	85.8266	99.9527	87.3614	7.32187e-39	1.82691	up
AT2G05940.1	119	92	130	41	40	31	31.6572	22.5633	33.4852	9.85684	9.5193	8.23162	8.30475e-06	-1.23413	down
AT2G05990.2	292	249	275	448	509	481	77.6798	61.068	70.8342	107.704	121.133	127.723	2.47907e-19	1.17557	up
AT2G06050.1	247	249	255	75	67	53	65.7086	61.068	65.6826	18.0308	15.9448	14.0734	2.92376e-19	-1.57719	down
AT2G06520.1	4023	4424	3978	17065	18136	16274	1070.23	1085	1024.65	4102.61	4316.05	4321.33	0	2.41287	up
AT2G10940.1	742	694	583	1939	2205	1991	197.392	170.206	150.168	466.156	524.751	528.682	8.91416e-88	1.96255	up
AT2G12462.1	44	45	28	13	9	8	11.7052	11.0364	7.21221	3.12534	2.14184	2.12429	0.00119873	-1.53632	down
AT2G12646.1	8	12	8	1	0	1	2.12821	2.94304	2.06063	0.240411	0	0.265536	0.00578876	-2.65656	down
AT2G13360.1	67	74	57	1259	1016	984	17.8238	18.1487	14.682	302.677	241.79	261.288	8.8511e-214	4.38173	up
AT2G13790.1	187	201	185	36	29	41	49.747	49.2959	47.6521	8.65478	6.90149	10.887	1.93323e-20	-2.047	down
AT2G13800.1	53	51	51	8	15	12	14.0994	12.5079	13.1365	1.92328	3.56974	3.18643	2.56693e-05	-1.72444	down
AT2G13820.1	117	114	91	45	36	36	31.1251	27.9588	23.4397	10.8185	8.56737	9.5593	3.36566e-05	-1.08551	down
AT2G14170.3	118	196	170	362	350	379	31.3912	48.0696	43.7884	87.0286	83.2939	100.638	7.9597e-19	1.53426	up
AT2G14247.1	21	62	83	14	6	8	5.58656	15.2057	21.379	3.36575	1.4279	2.12429	0.000390942	-2.0577	down
AT2G14260.2	4	5	9	17	15	14	1.06411	1.22627	2.31821	4.08698	3.56974	3.71751	0.00972234	1.59292	up
AT2G14285.1	35	46	45	69	79	60	9.31094	11.2816	11.591	16.5883	18.8006	15.9322	0.00010809	1.06877	up
AT2G14560.2	109	129	126	33	24	24	28.9969	31.6376	32.4549	7.93355	5.71158	6.37287	9.88531e-12	-1.78132	down
AT2G14620.1	10	15	17	3	3	0	2.66027	3.6788	4.37884	0.721232	0.713948	0	0.00770754	-2.13624	down
AT2G14750.1	403	434	459	147	154	143	107.209	106.44	118.229	35.3404	36.6493	37.9717	1.56557e-19	-1.17897	down
AT2G14880.1	82	72	83	168	175	131	21.8142	17.6582	21.379	40.389	41.6469	34.7852	1.96404e-12	1.3457	up
AT2G14910.1	332	334	329	754	729	667	88.3209	81.9145	84.7434	181.27	173.489	177.113	6.20738e-64	1.47015	up
AT2G15090.1	426	463	397	867	927	888	113.327	113.552	102.259	208.436	220.61	235.796	1.11436e-55	1.42299	up
AT2G15220.1	61	68	78	148	112	79	16.2276	16.6772	20.0911	35.5808	26.654	20.9774	5.76554e-05	1.04843	up
AT2G15390.2	93	140	130	25	15	12	24.7405	34.3354	33.4852	6.01027	3.56974	3.18643	1.72539e-13	-2.38987	down
AT2G15580.1	13	59	42	0	0	0	3.45835	14.4699	10.8183	0	0	0	4.14827e-08	-5.26788	down
AT2G15580.2	97	63	53	121	112	119	25.8046	15.4509	13.6517	29.0897	26.654	31.5988	8.20255e-05	1.06934	up
AT2G15620.1	38	47	42	129	126	113	10.109	11.5269	10.8183	31.013	29.9858	30.0056	5.65902e-18	1.87827	up
AT2G15890.1	659	735	733	3718	3999	3530	175.312	180.261	188.805	893.847	951.692	937.343	0	2.76284	up
AT2G15890.2	4	2	2	15	17	18	1.06411	0.490506	0.515158	3.60616	4.0457	4.77965	4.84203e-05	2.7179	up
AT2G15960.1	838	888	799	3878	4435	3816	222.931	217.785	205.805	932.312	1055.45	1013.29	1.71603e-293	2.62421	up
AT2G15970.1	509	556	599	1296	1270	1137	135.408	136.361	154.29	311.572	302.238	301.915	7.89592e-88	1.51301	up
AT2G16060.1	182	237	250	98	82	50	48.4169	58.125	64.3947	23.5602	19.5146	13.2768	4.35766e-07	-1.17491	down
AT2G16230.1	5	10	8	1	0	0	1.33013	2.45253	2.06063	0.240411	0	0	0.00668634	-2.85579	down
AT2G16365.2	48	68	66	97	111	79	12.7693	16.6772	17.0002	23.3198	26.4161	20.9774	3.99281e-05	1.00593	up
AT2G16385.1	45	55	62	5	3	2	11.9712	13.4889	15.9699	1.20205	0.713948	0.531072	1.73883e-10	-3.42308	down
AT2G16530.1	60	59	62	18	25	16	15.9616	14.4699	15.9699	4.32739	5.94956	4.24858	0.000476413	-1.22974	down
AT2G16595.1	51	70	62	23	19	15	13.5674	17.1677	15.9699	5.52944	4.52167	3.98304	0.000280977	-1.29062	down
AT2G16660.1	429	530	566	82	92	53	114.126	129.984	145.79	19.7137	21.8944	14.0734	1.16376e-39	-2.37475	down
AT2G16740.1	153	194	191	66	58	55	40.7021	47.5791	49.1976	15.8671	13.803	14.6045	1.60767e-09	-1.21497	down
AT2G16760.1	16	16	25	2	2	6	4.25643	3.92405	6.43947	0.480821	0.475965	1.59322	0.00596433	-1.92947	down
AT2G16890.2	27	37	35	10	3	3	7.18273	9.07436	9.01526	2.40411	0.713948	0.796608	0.000168494	-2.12853	down
AT2G16980.2	35	36	36	6	3	8	9.31094	8.82911	9.27284	1.44246	0.713948	2.12429	3.32019e-05	-2.15985	down
AT2G17040.1	34	43	59	4	3	1	9.04491	10.5459	15.1971	0.961642	0.713948	0.265536	1.10146e-08	-3.42753	down
AT2G17070.1	34	32	18	5	2	1	9.04491	7.8481	4.63642	1.20205	0.475965	0.265536	4.03194e-05	-2.74616	down
AT2G17080.1	51	70	54	5	4	1	13.5674	17.1677	13.9093	1.20205	0.95193	0.265536	3.21729e-11	-3.52929	down
AT2G17220.1	166	165	188	59	56	47	44.1605	40.4667	48.4248	14.1842	13.327	12.4802	1.44778e-10	-1.31002	down
AT2G17240.1	255	272	250	457	510	424	67.8368	66.7088	64.3947	109.868	121.371	112.587	1.23333e-27	1.19859	up
AT2G17280.1	108	122	129	30	42	26	28.7309	29.9209	33.2277	7.21232	9.99527	6.90394	1.27182e-08	-1.4929	down
AT2G17450.1	124	98	98	230	259	236	32.9873	24.0348	25.2427	55.2944	61.6375	62.6665	4.30869e-19	1.53153	up
AT2G17500.2	121	149	118	35	32	28	32.1892	36.5427	30.3943	8.41437	7.61544	7.43501	2.68152e-11	-1.64625	down
AT2G17550.1	13	3	10	28	21	24	3.45835	0.735759	2.57579	6.7315	4.99763	6.37287	0.00222025	1.72821	up
AT2G17650.1	5	6	4	16	10	16	1.33013	1.47152	1.03032	3.84657	2.37983	4.24858	0.00814419	1.70946	up
AT2G17695.1	50	54	71	89	111	89	13.3013	13.2437	18.2881	21.3965	26.4161	23.6327	1.98516e-05	1.0715	up
AT2G17700.1	69	86	72	31	28	28	18.3559	21.0918	18.5457	7.45273	6.66351	7.43501	0.000790049	-1.00246	down
AT2G17710.1	1630	1770	1617	356	301	271	433.624	434.098	416.505	85.5862	71.6327	71.9603	8.67709e-145	-2.07133	down
AT2G17720.1	531	613	612	176	157	161	141.26	150.34	157.638	42.3123	37.3633	42.7513	3.89425e-34	-1.462	down
AT2G17740.1	388	455	472	64	48	38	103.218	111.59	121.577	15.3863	11.4232	10.0904	3.62227e-52	-2.75391	down
AT2G17760.1	131	170	147	45	38	46	34.8495	41.693	37.8641	10.8185	9.04334	12.2147	5.81642e-10	-1.41383	down
AT2G17850.1	39	67	111	0	1	1	10.375	16.432	28.5912	0	0.237983	0.265536	5.06896e-12	-5.27489	down
AT2G17880.1	40	57	54	447	518	464	10.6411	13.9794	13.9093	107.464	123.275	123.209	4.22106e-100	3.58507	up
AT2G17972.1	63	63	69	100	111	114	16.7597	15.4509	17.7729	24.0411	26.4161	30.2711	8.22505e-07	1.09165	up
AT2G18050.1	10	9	0	241	258	190	2.66027	2.20728	0	57.939	61.3995	50.4519	4.84826e-10	4.75361	up
AT2G18150.1	11	13	12	0	1	0	2.9263	3.18829	3.09095	0	0.237983	0	0.00040944	-3.44119	down
AT2G18210.1	38	39	35	10	10	12	10.109	9.56487	9.01526	2.40411	2.37983	3.18643	0.00188472	-1.38824	down
AT2G18230.1	88	90	92	17	25	21	23.4104	22.0728	23.6973	4.08698	5.94956	5.57626	1.72782e-08	-1.70433	down
AT2G18280.2	381	393	391	846	883	852	101.356	96.3844	100.713	203.387	210.139	226.237	2.29241e-66	1.50883	up
AT2G18328.1	120	132	113	20	28	15	31.9232	32.3734	29.1064	4.80821	6.66351	3.98304	4.51361e-14	-2.13881	down
AT2G18360.1	55	61	68	20	18	15	14.6315	14.9604	17.5154	4.80821	4.28369	3.98304	6.67036e-05	-1.4023	down
AT2G18370.1	214	248	271	18	14	22	56.9297	60.8227	69.8039	4.32739	3.33176	5.84179	5.46947e-38	-3.34694	down
AT2G18410.2	22	31	21	0	4	0	5.85259	7.60284	5.40915	0	0.95193	0	1.7299e-05	-3.30579	down
AT2G18560.1	11	8	13	29	34	31	2.9263	1.96202	3.34852	6.97191	8.09141	8.23162	4.25177e-05	1.83908	up
AT2G18660.1	91	119	165	3	9	1	24.2084	29.1851	42.5005	0.721232	2.14184	0.265536	1.68475e-18	-4.25319	down
AT2G18690.1	200	186	222	68	53	46	53.2054	45.6171	57.1825	16.3479	12.6131	12.2147	5.71041e-13	-1.49513	down
AT2G18710.1	138	152	150	384	448	368	36.7117	37.2785	38.6368	92.3177	106.616	97.7173	1.39374e-42	1.80257	up
AT2G18730.1	197	223	250	80	81	77	52.4073	54.6914	64.3947	19.2328	19.2766	20.4463	8.18194e-10	-1.12307	down
AT2G18800.1	9	17	14	0	0	0	2.39424	4.1693	3.6061	0	0	0	6.50515e-05	-4.16133	down
AT2G18940.1	18	24	19	46	32	26	4.78848	5.88607	4.894	11.0589	7.61544	6.90394	0.00886575	1.09149	up
AT2G18950.1	198	247	220	98	64	72	52.6733	60.5775	56.6673	23.5602	15.2309	19.1186	8.1185e-09	-1.1356	down
AT2G19130.1	50	78	67	15	15	4	13.3013	19.1297	17.2578	3.60616	3.56974	1.06214	1.7357e-06	-2.08426	down
AT2G19150.1	17	15	16	0	0	2	4.52246	3.6788	4.12126	0	0	0.531072	0.000137384	-3.35222	down
AT2G19190.1	14	16	21	2	0	0	3.72438	3.92405	5.40915	0.480821	0	0	8.85653e-05	-3.43864	down
AT2G19590.1	219	246	241	29	23	18	58.2599	60.3322	62.0765	6.97191	5.4736	4.77965	3.85794e-37	-2.94005	down
AT2G19690.1	21	21	21	3	2	5	5.58656	5.15031	5.40915	0.721232	0.475965	1.32768	0.00118758	-2.09423	down
AT2G19800.1	149	138	156	954	1000	947	39.638	33.8449	40.1823	229.352	237.983	251.463	2.76664e-179	3.06608	up
AT2G20020.1	29	27	24	42	59	47	7.71478	6.62183	6.18189	10.0972	14.041	12.4802	0.000367873	1.22256	up
AT2G20110.2	10	7	12	0	0	1	2.66027	1.71677	3.09095	0	0	0.265536	0.00187735	-3.14509	down
AT2G20230.1	506	464	446	829	897	846	134.61	113.797	114.88	199.3	213.47	224.644	2.10299e-36	1.22138	up
AT2G20260.1	1086	1254	1081	4238	4627	4272	288.905	307.547	278.443	1018.86	1101.15	1134.37	4.27589e-251	2.30441	up
AT2G20515.1	85	107	68	16	6	8	22.6123	26.2421	17.5154	3.84657	1.4279	2.12429	3.85598e-11	-2.65935	down
AT2G20520.1	101	113	122	5	7	2	26.8687	27.7136	31.4246	1.20205	1.66588	0.531072	8.4476e-21	-4.04692	down
AT2G20562.1	103	145	159	53	41	21	27.4008	35.5617	40.955	12.7418	9.75728	5.57626	4.1577e-06	-1.44507	down
AT2G20610.2	136	267	167	36	36	40	36.1797	65.4826	43.0157	8.65478	8.56737	10.6214	1.1229e-11	-1.93769	down
AT2G20630.1	519	587	642	226	203	189	138.068	143.964	165.366	54.3328	48.3105	50.1863	8.4117e-20	-1.13554	down
AT2G20650.2	14	36	24	0	5	7	3.72438	8.82911	6.18189	0	1.18991	1.85875	0.0072473	-1.98626	down
AT2G20670.1	15	6	10	1860	2115	1822	3.9904	1.47152	2.57579	447.164	503.333	483.807	7.50685e-200	7.78607	up
AT2G20690.1	112	108	91	167	192	149	29.795	26.4873	23.4397	40.1486	45.6926	39.5649	4.46662e-09	1.0607	up
AT2G20725.1	84	109	100	167	176	165	22.3463	26.7326	25.7579	40.1486	41.8849	43.8135	4.24965e-11	1.15172	up
AT2G20890.1	583	639	545	1392	1352	1321	155.094	156.717	140.38	334.652	321.752	350.773	8.63575e-102	1.56418	up
AT2G20900.2	63	87	92	18	23	16	16.7597	21.337	23.6973	4.32739	5.4736	4.24858	5.14542e-07	-1.685	down
AT2G21170.1	1028	1028	1033	1776	1832	1683	273.476	252.12	266.079	426.969	435.984	446.897	2.82628e-76	1.13736	up
AT2G21210.1	10	10	13	228	244	214	2.66027	2.45253	3.34852	54.8136	58.0677	56.8247	3.51843e-60	4.6528	up
AT2G21240.2	6	1	1	10	12	21	1.59616	0.245253	0.257579	2.40411	2.85579	5.57626	0.00172884	2.44059	up
AT2G21280.1	50	66	50	104	94	97	13.3013	16.1867	12.8789	25.0027	22.3704	25.757	2.90797e-07	1.18274	up
AT2G21330.1	204	169	169	893	965	658	54.2695	41.4478	43.5308	214.687	229.653	174.723	3.38741e-75	2.55622	up
AT2G21530.1	67	49	48	285	260	263	17.8238	12.0174	12.3638	68.517	61.8755	69.836	1.97559e-46	2.64166	up
AT2G21540.2	41	42	44	83	95	113	10.9071	10.3006	11.3335	19.9541	22.6083	30.0056	5.69052e-09	1.54451	up
AT2G21640.1	18	23	16	76	42	22	4.78848	5.64082	4.12126	18.2712	9.99527	5.84179	0.00122654	1.56553	up
AT2G21650.1	8	17	10	0	1	0	2.12821	4.1693	2.57579	0	0.237983	0	0.000674314	-3.3663	down
AT2G21820.1	17	12	23	49	49	37	4.52246	2.94304	5.92431	11.7801	11.6611	9.82484	1.6422e-05	1.67766	up
AT2G21840.1	34	42	38	10	12	7	9.04491	10.3006	9.78799	2.40411	2.85579	1.85875	0.000644466	-1.55194	down
AT2G21850.1	46	53	58	14	18	8	12.2372	12.9984	14.9396	3.36575	4.28369	2.12429	0.000125178	-1.56611	down
AT2G21860.1	22	21	31	53	54	45	5.85259	5.15031	7.98494	12.7418	12.8511	11.9491	5.96885e-05	1.36535	up
AT2G21960.1	47	56	42	264	281	230	12.5033	13.7342	10.8183	63.4684	66.8731	61.0733	8.81868e-53	2.75979	up
AT2G22000.1	54	68	58	25	15	16	14.3655	16.6772	14.9396	6.01027	3.56974	4.24858	0.000380878	-1.29071	down
AT2G22080.1	176	241	191	455	527	408	46.8207	59.106	49.1976	109.387	125.417	108.339	3.51082e-30	1.55006	up
AT2G22122.1	265	314	291	467	514	433	70.4971	77.0094	74.9554	112.272	122.323	114.977	1.46013e-22	1.06059	up
AT2G22250.2	53	77	96	26	21	27	14.0994	18.8845	24.7276	6.25068	4.99763	7.16948	0.000786166	-1.21312	down
AT2G22250.3	32	40	35	13	7	2	8.51286	9.81012	9.01526	3.12534	1.66588	0.531072	0.000837253	-1.82427	down
AT2G22470.1	804	890	1001	320	283	307	213.886	218.275	257.836	76.9314	67.3491	81.5196	1.12592e-24	-1.1992	down
AT2G22500.1	247	276	261	63	63	61	65.7086	67.6898	67.2281	15.1459	14.9929	16.1977	2.43449e-23	-1.69426	down
AT2G22510.1	221	231	256	13	16	7	58.7919	56.6534	65.9402	3.12534	3.80772	1.85875	1.32428e-40	-3.86653	down
AT2G22720.3	0	0	0	21	24	26	0	0	0	5.04862	5.71158	6.90394	5.63507e-09	5.45268	up
AT2G22880.1	18	19	26	3	7	4	4.78848	4.65981	6.69705	0.721232	1.66588	1.06214	0.00778245	-1.67539	down
AT2G22920.1	18	19	23	0	0	1	4.78848	4.65981	5.92431	0	0	0.265536	6.78552e-06	-4.08794	down
AT2G22930.1	49	59	43	0	0	1	13.0353	14.4699	11.0759	0	0	0.265536	1.04365e-10	-5.2846	down
AT2G22980.2	3	4	6	29	33	31	0.798081	0.981012	1.54547	6.97191	7.85342	8.23162	1.41805e-08	3.00736	up
AT2G22990.1	0	0	0	1124	119	931	0	0	0	270.222	28.3199	247.214	3.80125e-14	7.30476	up
AT2G23030.1	42	40	31	144	130	110	11.1731	9.81012	7.98494	34.6191	30.9377	29.209	7.35628e-20	2.09931	up
AT2G23050.1	23	18	13	2	3	1	6.11862	4.41455	3.34852	0.480821	0.713948	0.265536	0.000826616	-2.48396	down
AT2G23110.1	2	2	1	10	9	10	0.532054	0.490506	0.257579	2.40411	2.14184	2.65536	0.0019328	2.49533	up
AT2G23130.1	158	163	125	301	349	311	42.0322	39.9762	32.1974	72.3636	83.0559	82.5817	2.80006e-22	1.46476	up
AT2G23170.1	47	41	45	8	10	8	12.5033	10.0554	11.591	1.92328	2.37983	2.12429	1.42446e-05	-1.91795	down
AT2G23270.1	17	21	33	2	5	5	4.52246	5.15031	8.5001	0.480821	1.18991	1.32768	0.00183282	-2.01496	down
AT2G23290.1	316	326	323	115	85	88	84.0645	79.9525	83.198	27.6472	20.2285	23.3672	1.65605e-18	-1.37735	down
AT2G23300.1	28	27	33	1	0	3	7.44875	6.62183	8.5001	0.240411	0	0.796608	8.13006e-07	-3.56803	down
AT2G23440.1	14	16	25	0	0	1	3.72438	3.92405	6.43947	0	0	0.265536	2.04459e-05	-3.94967	down
AT2G23520.1	24	40	39	7	10	9	6.38464	9.81012	10.0456	1.68287	2.37983	2.38983	0.0020879	-1.54094	down
AT2G23540.1	97	105	105	12	3	4	25.8046	25.7516	27.0458	2.88493	0.713948	1.06214	1.62328e-17	-3.51934	down
AT2G23620.1	224	272	298	43	48	32	59.59	66.7088	76.7585	10.3377	11.4232	8.49716	8.74927e-28	-2.30892	down
AT2G23630.1	10	18	16	0	1	1	2.66027	4.41455	4.12126	0	0.237983	0.265536	0.000296684	-3.23556	down
AT2G23670.1	245	276	263	477	509	401	65.1766	67.6898	67.7432	114.676	121.133	106.48	2.60942e-26	1.17986	up
AT2G23680.1	24	45	52	4	2	0	6.38464	11.0364	13.3941	0.961642	0.475965	0	1.30221e-07	-3.55729	down
AT2G23680.2	189	185	129	56	56	44	50.2791	45.3718	33.2277	13.463	13.327	11.6836	3.01569e-08	-1.31453	down
AT2G23770.1	29	22	29	3	9	3	7.71478	5.39557	7.46979	0.721232	2.14184	0.796608	0.00145889	-1.91694	down
AT2G23810.1	898	989	1043	364	362	353	238.892	242.555	268.655	87.5095	86.1497	93.7343	2.08932e-30	-1.07616	down
AT2G23840.1	56	58	77	134	118	117	14.8975	14.2247	19.8336	32.215	28.0819	31.0677	3.10356e-09	1.29789	up
AT2G23950.1	51	53	49	23	20	15	13.5674	12.9984	12.6214	5.52944	4.75965	3.98304	0.00609587	-1.01665	down
AT2G23960.1	13	12	14	0	0	0	3.45835	2.94304	3.6061	0	0	0	6.41364e-05	-4.1589	down
AT2G24020.2	318	326	331	698	879	670	84.5965	79.9525	85.2586	167.807	209.187	177.909	1.03094e-41	1.56033	up
AT2G24060.1	164	160	157	397	345	345	43.6284	39.2405	40.4399	95.443	82.104	91.61	8.92126e-33	1.53202	up
AT2G24090.1	285	328	287	852	939	784	75.8177	80.443	73.9251	204.83	223.466	208.18	5.84395e-91	1.87525	up
AT2G24170.1	75	87	95	14	27	22	19.952	21.337	24.47	3.36575	6.42553	5.84179	1.01155e-06	-1.62566	down
AT2G24240.1	37	43	41	71	75	58	9.84299	10.5459	10.5607	17.0692	17.8487	15.4011	5.44456e-05	1.09768	up
AT2G24260.1	37	38	44	90	61	73	9.84299	9.31961	11.3335	21.637	14.5169	19.3841	1.13264e-05	1.25355	up
AT2G24270.1	138	171	154	527	539	428	36.7117	41.9383	39.6671	126.696	128.273	113.649	2.72535e-62	2.04349	up
AT2G24280.1	57	97	71	146	120	107	15.1635	23.7895	18.2881	35.1	28.5579	28.4124	4.02448e-06	1.08121	up
AT2G24300.1	45	50	34	10	16	7	11.9712	12.2627	8.75768	2.40411	3.80772	1.85875	0.000752216	-1.54499	down
AT2G24390.3	116	131	102	39	22	22	30.8591	32.1281	26.273	9.37601	5.23562	5.84179	4.485e-09	-1.68478	down
AT2G24395.1	20	44	26	86	125	95	5.32054	10.7911	6.69705	20.6753	29.7478	25.2259	1.97557e-11	2.0935	up
AT2G24400.1	21	21	10	0	1	0	5.58656	5.15031	2.57579	0	0.237983	0	3.90816e-05	-3.86642	down
AT2G24570.1	271	317	257	91	59	40	72.0933	77.7452	66.1978	21.8774	14.041	10.6214	7.15552e-15	-1.78087	down
AT2G24600.2	39	47	33	8	7	0	10.375	11.5269	8.5001	1.92328	1.66588	0	2.06121e-05	-2.46032	down
AT2G24600.3	15	18	12	0	4	2	3.9904	4.41455	3.09095	0	0.95193	0.531072	0.00517487	-2.21012	down
AT2G24600.4	89	86	83	11	8	11	23.6764	21.0918	21.379	2.64452	1.90386	2.9209	1.70505e-13	-2.66527	down
AT2G24610.1	23	23	20	5	2	1	6.11862	5.64082	5.15158	1.20205	0.475965	0.265536	0.000301099	-2.43621	down
AT2G24820.1	158	152	161	263	273	226	42.0322	37.2785	41.4702	63.228	64.9692	60.0112	8.42812e-14	1.0489	up
AT2G24850.1	9	6	11	1	1	0	2.39424	1.47152	2.83337	0.240411	0.237983	0	0.0088767	-2.57067	down
AT2G25000.1	247	285	284	57	40	55	65.7086	69.8971	73.1524	13.7034	9.5193	14.6045	5.2924e-26	-2.04298	down
AT2G25080.1	287	308	269	1927	2037	1744	76.3497	75.5379	69.2887	463.271	484.77	463.095	0	3.0814	up
AT2G25090.1	5	9	8	21	20	14	1.33013	2.20728	2.06063	5.04862	4.75965	3.71751	0.00486737	1.58221	up
AT2G25150.1	7	13	10	2	0	1	1.86219	3.18829	2.57579	0.480821	0	0.265536	0.00972327	-2.38943	down
AT2G25160.1	27	47	38	7	1	4	7.18273	11.5269	9.78799	1.68287	0.237983	1.06214	6.48172e-06	-2.64708	down
AT2G25200.1	8	19	19	61	65	52	2.12821	4.65981	4.894	14.665	15.4689	13.8079	9.26436e-10	2.25093	up
AT2G25240.1	68	59	77	8	11	9	18.0898	14.4699	19.8336	1.92328	2.61781	2.38983	1.36729e-09	-2.42206	down
AT2G25260.1	92	83	78	15	18	19	24.4745	20.356	20.0911	3.60616	4.28369	5.04519	6.51018e-09	-1.87797	down
AT2G25450.1	424	462	439	1658	1546	1236	112.795	113.307	113.077	398.601	367.921	328.203	4.98864e-133	2.09844	up
AT2G25605.1	15	7	18	37	44	21	3.9904	1.71677	4.63642	8.89519	10.4712	5.57626	0.00129431	1.61076	up
AT2G25625.1	138	187	175	58	37	55	36.7117	45.8623	45.0763	13.9438	8.80535	14.6045	2.2843e-08	-1.3526	down
AT2G25680.1	58	58	54	21	16	13	15.4296	14.2247	13.9093	5.04862	3.80772	3.45197	0.000172394	-1.37269	down
AT2G25770.1	1	2	3	9	13	15	0.266027	0.490506	0.772736	2.1637	3.09377	3.98304	0.000562221	2.62261	up
AT2G25810.1	42	61	63	6	7	7	11.1731	14.9604	16.2275	1.44246	1.66588	1.85875	1.77163e-08	-2.56874	down
AT2G25830.1	51	48	35	94	100	72	13.5674	11.7721	9.01526	22.5986	23.7983	19.1186	3.88122e-07	1.32812	up
AT2G25900.1	0	41	23	504	548	433	0	10.0554	5.92431	121.167	130.414	114.977	0.00162702	3.39011	up
AT2G25980.1	64	60	49	9	5	3	17.0257	14.7152	12.6214	2.1637	1.18991	0.796608	1.71282e-09	-2.84943	down
AT2G26170.1	65	80	61	24	25	25	17.2917	19.6202	15.7123	5.76985	5.94956	6.6384	0.000711629	-1.08947	down
AT2G26310.1	33	32	21	9	5	9	8.77889	7.8481	5.40915	2.1637	1.18991	2.38983	0.00742088	-1.45325	down
AT2G26340.1	158	172	146	349	335	310	42.0322	42.1835	37.6065	83.9033	79.7241	82.3162	5.63081e-29	1.41961	up
AT2G26360.1	17	21	17	6	3	2	4.52246	5.15031	4.37884	1.44246	0.713948	0.531072	0.0069728	-1.79908	down
AT2G26400.1	39	62	64	4	0	2	10.375	15.2057	16.485	0.961642	0	0.531072	1.19156e-10	-4.00659	down
AT2G26430.3	15	34	33	0	0	0	3.9904	8.3386	8.5001	0	0	0	2.78315e-07	-4.98969	down
AT2G26440.1	362	365	394	142	140	135	96.3017	89.5173	101.486	34.1383	33.3176	35.8474	6.98454e-15	-1.06109	down
AT2G26480.1	42	45	49	6	8	3	11.1731	11.0364	12.6214	1.44246	1.90386	0.796608	2.60621e-07	-2.51271	down
AT2G26500.1	1104	1204	1154	4738	5743	4367	293.694	295.285	297.246	1139.07	1366.73	1159.6	7.11369e-195	2.45719	up
AT2G26540.1	30	44	32	68	63	55	7.98081	10.7911	8.24252	16.3479	14.9929	14.6045	9.20755e-05	1.15511	up
AT2G26580.1	48	58	46	83	102	86	12.7693	14.2247	11.8486	19.9541	24.2742	22.8361	1.13001e-06	1.18496	up
AT2G26590.3	118	151	131	54	43	55	31.3912	37.0332	33.7428	12.9822	10.2332	14.6045	1.41358e-05	-1.01744	down
AT2G26695.1	0	0	0	6	11	15	0	0	0	1.44246	2.61781	3.98304	1.87724e-05	4.41052	up
AT2G26930.1	36	50	38	68	96	83	9.57697	12.2627	9.78799	16.3479	22.8463	22.0395	1.60559e-06	1.34206	up
AT2G26975.1	190	243	190	324	374	287	50.5451	59.5965	48.94	77.893	89.0055	76.2089	9.10167e-13	1.01918	up
AT2G26980.1	0	0	0	45	22	21	0	0	0	10.8185	5.23562	5.57626	1.12251e-09	5.64677	up
AT2G26980.3	9	8	10	336	421	367	2.39424	1.96202	2.57579	80.778	100.191	97.4518	1.74572e-77	5.6234	up
AT2G27290.1	209	259	258	531	535	437	55.5996	63.5205	66.4553	127.658	127.321	116.039	5.9679e-34	1.40614	up
AT2G27370.1	68	108	86	30	39	30	18.0898	26.4873	22.1518	7.21232	9.28132	7.96608	0.00088484	-1.01924	down
AT2G27385.1	82	156	144	308	332	205	21.8142	38.2595	37.0913	74.0465	79.0102	54.4349	2.51077e-10	1.48683	up
AT2G27389.1	91	106	137	25	16	18	24.2084	25.9968	35.2883	6.01027	3.80772	4.77965	4.54232e-11	-2.09648	down
AT2G27402.1	151	163	152	256	336	280	40.1701	39.9762	39.152	61.5451	79.9621	74.3501	6.55954e-16	1.26172	up
AT2G27500.3	7	4	5	14	18	15	1.86219	0.981012	1.28789	3.36575	4.28369	3.98304	0.00364444	1.77723	up
AT2G27660.1	150	186	224	50	37	31	39.904	45.6171	57.6977	12.0205	8.80535	8.23162	8.05815e-14	-1.86493	down
AT2G27680.1	214	227	201	408	403	370	56.9297	55.6724	51.7733	98.0875	95.907	98.2484	1.04845e-27	1.23811	up
AT2G27830.1	110	153	156	293	323	272	29.263	37.5237	40.1823	70.4403	76.8684	72.2258	5.56132e-20	1.43949	up
AT2G27840.1	226	237	202	96	72	74	60.1221	58.125	52.0309	23.0794	17.1347	19.6497	2.02805e-09	-1.09019	down
AT2G27920.1	105	90	95	29	32	23	27.9328	22.0728	24.47	6.97191	7.61544	6.10733	5.692e-07	-1.40858	down
AT2G28120.1	48	55	36	102	92	86	12.7693	13.4889	9.27284	24.5219	21.8944	22.8361	4.03184e-08	1.35635	up
AT2G28150.1	16	21	21	38	35	46	4.25643	5.15031	5.40915	9.1356	8.32939	12.2147	0.000440906	1.36769	up
AT2G28160.1	14	18	19	1	3	1	3.72438	4.41455	4.894	0.240411	0.713948	0.265536	0.000631647	-2.60842	down
AT2G28200.1	70	87	81	164	164	129	18.6219	21.337	20.8639	39.4273	39.0291	34.2542	3.98188e-12	1.29183	up
AT2G28250.1	13	11	9	1	0	0	3.45835	2.69778	2.31821	0.240411	0	0	0.000772369	-3.32664	down
AT2G28250.2	57	76	78	8	9	5	15.1635	18.6392	20.0911	1.92328	2.14184	1.32768	3.06415e-11	-2.7919	down
AT2G28440.1	5	8	7	0	0	0	1.33013	1.96202	1.80305	0	0	0	0.00284864	-3.36293	down
AT2G28510.1	139	151	166	49	38	44	36.9777	37.0332	42.7581	11.7801	9.04334	11.6836	2.64626e-10	-1.42226	down
AT2G28570.1	379	369	374	49	57	48	100.824	90.4984	96.3345	11.7801	13.565	12.7457	8.41054e-49	-2.48881	down
AT2G28605.1	27	37	26	97	94	79	7.18273	9.07436	6.69705	23.3198	22.3704	20.9774	3.58612e-13	1.91885	up
AT2G28660.1	46	45	34	75	75	61	12.2372	11.0364	8.75768	18.0308	17.8487	16.1977	6.43823e-05	1.09873	up
AT2G28670.1	67	74	90	40	28	21	17.8238	18.1487	23.1821	9.61642	6.66351	5.57626	0.00261628	-1.00246	down
AT2G28690.1	24	28	31	4	1	4	6.38464	6.86708	7.98494	0.961642	0.237983	1.06214	3.15934e-05	-2.60263	down
AT2G28760.2	56	61	60	3	4	9	14.8975	14.9604	15.4547	0.721232	0.95193	2.38983	6.49591e-10	-2.94272	down
AT2G28780.1	31	23	17	3	4	1	8.24683	5.64082	4.37884	0.721232	0.95193	0.265536	0.000198157	-2.5263	down
AT2G28790.1	157	169	180	62	42	32	41.7662	41.4478	46.3642	14.9055	9.99527	8.49716	1.36533e-10	-1.52386	down
AT2G28860.1	28	41	32	1	0	0	7.44875	10.0554	8.24252	0.240411	0	0	2.57396e-08	-4.76098	down
AT2G28960.1	23	33	19	6	5	5	6.11862	8.09335	4.894	1.44246	1.18991	1.32768	0.00270036	-1.74167	down
AT2G28990.1	15	17	24	1	0	1	3.9904	4.1693	6.18189	0.240411	0	0.265536	3.47534e-05	-3.56252	down
AT2G29070.2	104	134	136	27	34	29	27.6668	32.8639	35.0307	6.49109	8.09141	7.70055	1.83608e-10	-1.66685	down
AT2G29100.1	10	15	10	0	1	0	2.66027	3.6788	2.57579	0	0.237983	0	0.000551694	-3.3917	down
AT2G29120.1	70	58	69	10	10	19	18.6219	14.2247	17.7729	2.40411	2.37983	5.04519	2.1903e-06	-1.90255	down
AT2G29180.1	55	56	71	147	171	128	14.6315	13.7342	18.2881	35.3404	40.695	33.9886	5.85317e-15	1.63616	up
AT2G29290.2	22	26	23	178	173	175	5.85259	6.37658	5.92431	42.7931	41.171	46.4688	2.95584e-43	3.21504	up
AT2G29300.1	0	0	0	11	5	10	0	0	0	2.64452	1.18991	2.65536	7.40216e-05	4.16792	up
AT2G29310.1	21	17	22	105	130	89	5.58656	4.1693	5.66673	25.2431	30.9377	23.6327	1.48023e-21	2.7395	up
AT2G29320.1	55	62	72	133	121	107	14.6315	15.2057	18.5457	31.9746	28.7959	28.4124	1.30814e-09	1.28146	up
AT2G29340.1	6	7	6	22	19	17	1.59616	1.71677	1.54547	5.28903	4.52167	4.51411	0.000732416	1.85476	up
AT2G29340.2	135	130	150	331	362	292	35.9136	31.8829	38.6368	79.5759	86.1497	77.5365	5.32748e-30	1.59915	up
AT2G29340.3	2	3	4	21	17	8	0.532054	0.735759	1.03032	5.04862	4.0457	2.12429	0.000538646	2.42366	up
AT2G29350.1	54	79	78	9	4	0	14.3655	19.375	20.0911	2.1637	0.95193	0	4.37899e-11	-3.4478	down
AT2G29360.1	77	101	87	158	176	167	20.4841	24.7706	22.4094	37.9849	41.8849	44.3445	2.70835e-12	1.27655	up
AT2G29370.1	41	55	44	7	5	3	10.9071	13.4889	11.3335	1.68287	1.18991	0.796608	5.32508e-08	-2.71108	down
AT2G29440.1	40	59	61	9	8	7	10.6411	14.4699	15.7123	2.1637	1.90386	1.85875	2.70435e-07	-2.27768	down
[truncated: 4,389 more rows]
