# Supplementary material for: Full-length transcriptome sequencing of Arabidopsis plants provided new insights into the autophagic regulation of photosynthesis
Source: Sci Rep. 2024 Jun 25;14:14588. doi: 10.1038/s41598-024-65555-7 (PMC11199623; doi:10.1038/s41598-024-65555-7)
Supplement: Supplementary file 5 — Supplementary Table S4. [file 41598_2024_65555_MOESM5_ESM.xlsx]

## Sheet: Sheet1
Table S4. DETs specifically expressed between C v.s D
#ID	C1_Count	C2_Count	C3_Count	D1_Count	D2_Count	D3_Count	C1_CPM	C2_CPM	C3_CPM	D1_CPM	D2_CPM	D3_CPM	FDR	log2FC	regulated
AT1G12940.1	691	895	903	0	0	0	183.825	219.501	232.594	0	0	0	2.87e-36	-9.29679	down
AT4G23570.2	242	261	285	0	0	0	64.3785	64.011	73.41	0	0	0	3.14e-23	-7.86785	down
AT2G47880.1	404	547	464	0	2	1	107.475	134.153	119.517	0	0.475965	0.265536	4.82e-38	-7.61714	down
AT4G25340.2	200	212	208	0	0	0	53.2054	51.9936	53.5764	0	0	0	4.98e-21	-7.57389	down
AT1G08090.1	178	199	224	0	0	0	47.3528	48.8053	57.6977	0	0	0	1.23e-20	-7.52642	down
AT1G57765.2	193	200	197	0	0	0	51.3432	49.0506	50.743	0	0	0	1.4e-20	-7.51221	down
AT5G16570.1	548	662	618	4	2	0	145.783	162.357	159.184	0.961642	0.475965	0	2.31e-51	-7.38392	down
AT5G25980.3	125	146	127	0	0	0	33.2534	35.8069	32.7125	0	0	0	3.3e-17	-7.01801	down
AT4G28770.1	67	129	240	0	0	0	17.8238	31.6376	61.8189	0	0	0	4.42e-16	-6.94901	down
AT1G34350.1	71	171	159	0	0	0	18.8879	41.9383	40.955	0	0	0	3.22e-16	-6.92174	down
AT5G62290.1	106	127	96	0	0	0	28.1988	31.1471	24.7276	0	0	0	1.17e-15	-6.7727	down
AT5G48000.2	106	105	110	0	0	0	28.1988	25.7516	28.3337	0	0	0	1.5e-15	-6.75143	down
AT3G62960.1	262	373	365	1	2	2	69.699	91.4794	94.0163	0.240411	0.475965	0.531072	8.79e-36	-6.71102	down
AT1G25220.1	49	156	128	0	0	0	13.0353	38.2595	32.9701	0	0	0	2.01e-14	-6.63964	down
ONT.11190.1	85	91	114	0	0	0	22.6123	22.318	29.364	0	0	0	1.13e-14	-6.61024	down
AT1G66700.1	202	152	117	2	0	0	53.7374	37.2785	30.1367	0.480821	0	0	2.61e-20	-6.39141	down
AT5G11930.1	191	204	256	3	1	1	50.8111	50.0316	65.9402	0.721232	0.237983	0.265536	9.85e-29	-6.12898	down
ONT.17198.1	51	69	74	0	0	0	13.5674	16.9225	19.0608	0	0	0	5.66e-12	-6.10473	down
AT1G70260.1	96	75	94	0	1	0	25.5386	18.394	24.2124	0	0.237983	0	1.02e-14	-6.02156	down
AT5G37690.1	218	277	258	4	1	2	57.9939	67.9351	66.4553	0.961642	0.237983	0.531072	2.88e-34	-5.9957	down
AT5G44785.1	55	63	53	0	0	0	14.6315	15.4509	13.6517	0	0	0	2.49e-11	-5.96384	down
AT1G33060.1	52	75	40	0	0	0	13.8334	18.394	10.3032	0	0	0	6.78e-11	-5.88985	down
AT5G04120.1	69	83	77	1	0	0	18.3559	20.356	19.8336	0.240411	0	0	1.02e-13	-5.83954	down
AT4G32950.1	59	68	85	0	0	1	15.6956	16.6772	21.8942	0	0	0.265536	6.06e-13	-5.72068	down
AT5G02780.2	37	44	60	0	0	0	9.84299	10.7911	15.4547	0	0	0	4.6e-10	-5.69856	down
AT4G31430.1	57	63	23	0	0	0	15.1635	15.4509	5.92431	0	0	0	1.27e-09	-5.62997	down
AT3G32040.1	45	42	43	0	0	0	11.9712	10.3006	11.0759	0	0	0	8.21e-10	-5.62712	down
AT5G54920.2	38	44	47	0	0	0	10.109	10.7911	12.1062	0	0	0	9.48e-10	-5.61342	down
ONT.3849.2	60	81	53	0	0	1	15.9616	19.8655	13.6517	0	0	0.265536	2.8e-12	-5.59961	down
AT1G21240.1	35	33	64	0	0	0	9.31094	8.09335	16.485	0	0	0	1.73e-09	-5.58017	down
AT5G14340.1	102	105	102	1	1	1	27.1347	25.7516	26.273	0.240411	0.237983	0.265536	9.57e-18	-5.57391	down
AT3G18200.2	44	47	34	0	0	0	11.7052	11.5269	8.75768	0	0	0	1.53e-09	-5.56717	down
AT3G07270.2	39	37	46	0	0	0	10.375	9.07436	11.8486	0	0	0	1.91e-09	-5.54289	down
ONT.18428.2	82	111	128	3	1	0	21.8142	27.2231	32.9701	0.721232	0.237983	0	7.47e-18	-5.35268	down
AT1G02450.1	37	62	59	1	0	0	9.84299	15.2057	15.1971	0.240411	0	0	8.87e-11	-5.32438	down
AT4G15393.2	143	148	175	0	2	5	38.0418	36.2974	45.0763	0	0.475965	1.32768	4.09e-25	-5.31801	down
AT5G10760.1	54	76	76	2	0	0	14.3655	18.6392	19.576	0.480821	0	0	4.8e-13	-5.3065	down
AT2G22930.1	49	59	43	0	0	1	13.0353	14.4699	11.0759	0	0	0.265536	1.04e-10	-5.2846	down
AT3G24890.1	32	34	32	0	0	0	8.51286	8.3386	8.24252	0	0	0	2.06e-08	-5.27983	down
AT2G17850.1	39	67	111	0	1	1	10.375	16.432	28.5912	0	0.237983	0.265536	5.07e-12	-5.27489	down
AT2G15580.1	13	59	42	0	0	0	3.45835	14.4699	10.8183	0	0	0	4.15e-08	-5.26788	down
AT2G47760.3	35	42	23	0	0	0	9.31094	10.3006	5.92431	0	0	0	2.58e-08	-5.26745	down
AT1G54540.1	20	43	39	0	0	0	5.32054	10.5459	10.0456	0	0	0	2.84e-08	-5.26546	down
AT5G58780.1	24	28	47	0	0	0	6.38464	6.86708	12.1062	0	0	0	3.63e-08	-5.23697	down
AT4G36980.4	34	24	38	0	0	0	9.04491	5.88607	9.78799	0	0	0	3.51e-08	-5.23019	down
AT1G26200.1	27	33	31	0	0	0	7.18273	8.09335	7.98494	0	0	0	4.69e-08	-5.18535	down
AT3G45660.1	56	63	60	1	1	0	14.8975	15.4509	15.4547	0.240411	0.237983	0	3.27e-12	-5.1366	down
AT4G12350.1	58	52	70	2	0	0	15.4296	12.7532	18.0305	0.480821	0	0	5.35e-12	-5.1305	down
AT4G35180.1	35	55	44	0	1	0	9.31094	13.4889	11.3335	0	0.237983	0	7.15e-10	-5.12147	down
AT4G25010.1	22	35	29	0	0	0	5.85259	8.58386	7.46979	0	0	0	1.01e-07	-5.09918	down
AT5G66815.1	24	23	40	0	0	0	6.38464	5.64082	10.3032	0	0	0	1.17e-07	-5.0922	down
AT5G64530.1	49	53	74	0	1	1	13.0353	12.9984	19.0608	0	0.237983	0.265536	1.02e-11	-5.08751	down
AT1G73600.2	461	534	577	14	13	7	122.638	130.965	148.623	3.36575	3.09377	1.85875	9.84e-77	-5.08287	down
AT5G07475.1	97	112	94	1	1	3	25.8046	27.4683	24.2124	0.240411	0.237983	0.796608	2.24e-18	-5.07575	down
AT4G26860.2	25	31	27	0	0	0	6.65067	7.60284	6.95463	0	0	0	1.21e-07	-5.07207	down
AT4G04510.1	19	33	32	0	0	0	5.05451	8.09335	8.24252	0	0	0	1.48e-07	-5.05657	down
ONT.18984.2	19	30	35	0	0	0	5.05451	7.35759	9.01526	0	0	0	1.54e-07	-5.05376	down
AT3G45080.1	30	44	50	0	1	0	7.98081	10.7911	12.8789	0	0.237983	0	2.46e-09	-5.01321	down
AT4G11890.4	26	8	68	0	0	0	6.9167	1.96202	17.5154	0	0	0	5.11e-07	-4.99882	down
AT1G13420.1	299	367	321	8	4	10	79.542	90.0079	82.6828	1.92328	0.95193	2.65536	1.1e-52	-4.99608	down
AT2G26430.3	15	34	33	0	0	0	3.9904	8.3386	8.5001	0	0	0	2.78e-07	-4.98969	down
ONT.594.1	118	99	91	3	2	1	31.3912	24.28	23.4397	0.721232	0.475965	0.265536	1.58e-18	-4.91077	down
AT2G04515.1	94	102	107	3	2	1	25.0065	25.0158	27.5609	0.721232	0.475965	0.265536	9.54e-19	-4.89484	down
ONT.6942.5	30	20	22	0	0	0	7.98081	4.90506	5.66673	0	0	0	5.62e-07	-4.88384	down
ONT.12359.1	47	47	53	2	0	0	12.5033	11.5269	13.6517	0.480821	0	0	1.18e-10	-4.86813	down
AT4G03540.1	46	44	53	1	1	0	12.2372	10.7911	13.6517	0.240411	0.237983	0	1.77e-10	-4.83242	down
ONT.8611.1	76	103	74	5	0	0	20.218	25.2611	19.0608	1.20205	0	0	2.66e-15	-4.80591	down
AT2G38470.1	27	24	16	0	0	0	7.18273	5.88607	4.12126	0	0	0	1.15e-06	-4.78861	down
ONT.18177.2	43	45	49	0	1	1	11.4392	11.0364	12.6214	0	0.237983	0.265536	3.17e-10	-4.77364	down
AT1G01453.1	24	16	26	0	0	0	6.38464	3.92405	6.69705	0	0	0	1.3e-06	-4.77247	down
AT5G39150.1	21	25	19	0	0	0	5.58656	6.13133	4.894	0	0	0	1.24e-06	-4.77098	down
AT4G08780.1	47	65	61	1	1	1	12.5033	15.9414	15.7123	0.240411	0.237983	0.265536	6.02e-12	-4.76958	down
AT3G28580.1	14	22	30	0	0	0	3.72438	5.39557	7.72736	0	0	0	1.65e-06	-4.74572	down
AT4G15396.1	23	20	20	0	0	0	6.11862	4.90506	5.15158	0	0	0	1.58e-06	-4.73714	down
AT1G60850.1	22	19	22	0	0	0	5.85259	4.65981	5.66673	0	0	0	1.59e-06	-4.73694	down
ONT.1259.2	20	26	16	0	0	0	5.32054	6.37658	4.12126	0	0	0	2.13e-06	-4.69948	down
ONT.1786.1	50	52	60	2	1	0	13.3013	12.7532	15.4547	0.480821	0.237983	0	1.91e-11	-4.6881	down
AT5G58860.1	85	89	87	3	2	1	22.6123	21.8275	22.4094	0.721232	0.475965	0.265536	7.39e-17	-4.68753	down
AT4G17670.1	330	415	402	13	9	11	87.7889	101.78	103.547	3.12534	2.14184	2.9209	1.21e-61	-4.67018	down
AT1G80130.1	945	977	1023	35	23	30	251.395	239.612	263.503	8.41437	5.4736	7.96608	1.36e-151	-4.67017	down
AT3G45070.1	230	265	254	4	8	9	61.1862	64.992	65.425	0.961642	1.90386	2.38983	4.05e-43	-4.66598	down
AT4G12360.1	13	18	31	0	0	0	3.45835	4.41455	7.98494	0	0	0	3.35e-06	-4.65117	down
AT3G57570.1	54	9	12	0	0	0	14.3655	2.20728	3.09095	0	0	0	5.51e-06	-4.64781	down
ONT.1635.1	22	16	20	0	0	0	5.85259	3.92405	5.15158	0	0	0	3.44e-06	-4.62983	down
ONT.2011.2	34	41	46	1	1	0	9.04491	10.0554	11.8486	0.240411	0.237983	0	2.56e-09	-4.6041	down
ONT.9128.1	25	30	34	0	0	1	6.65067	7.35759	8.75768	0	0	0.265536	1.1e-07	-4.59679	down
AT1G34060.1	114	121	170	4	4	3	30.3271	29.6756	43.7884	0.961642	0.95193	0.796608	1.1e-22	-4.59426	down
ONT.6832.2	26	28	33	0	1	0	6.9167	6.86708	8.5001	0	0.237983	0	1.36e-07	-4.57509	down
ONT.10005.1	32	28	26	0	1	0	8.51286	6.86708	6.69705	0	0.237983	0	1.53e-07	-4.5615	down
ONT.18346.1	34	28	24	0	0	1	9.04491	6.86708	6.18189	0	0	0.265536	1.75e-07	-4.54901	down
ONT.13605.2	53	90	69	0	4	1	14.0994	22.0728	17.7729	0	0.95193	0.265536	3.39e-13	-4.54558	down
AT5G47980.1	51	61	65	3	0	1	13.5674	14.9604	16.7426	0.721232	0	0.265536	3.9e-12	-4.54412	down
ONT.18316.1	12	21	22	0	0	0	3.19232	5.15031	5.66673	0	0	0	6.55e-06	-4.54027	down
AT3G02885.1	99	126	131	5	1	4	26.3367	30.9019	33.7428	1.20205	0.237983	1.06214	2.37e-21	-4.53229	down
AT3G28570.1	17	17	19	0	0	0	4.52246	4.1693	4.894	0	0	0	6.69e-06	-4.52856	down
AT4G01650.1	18	19	16	0	0	0	4.78848	4.65981	4.12126	0	0	0	6.73e-06	-4.52752	down
AT5G09480.1	161	171	232	8	4	5	42.8303	41.9383	59.7583	1.92328	0.95193	1.32768	4.23e-30	-4.52398	down
ONT.5795.2	15	18	20	0	0	0	3.9904	4.41455	5.15158	0	0	0	6.98e-06	-4.52306	down
AT1G61800.1	358	439	507	17	12	13	95.2376	107.666	130.592	4.08698	2.85579	3.45197	1.71e-62	-4.51902	down
AT1G62262.1	10	25	20	0	0	0	2.66027	6.13133	5.15158	0	0	0	8.56e-06	-4.50766	down
AT5G26300.1	11	19	24	0	0	0	2.9263	4.65981	6.18189	0	0	0	8.59e-06	-4.50358	down
AT3G29430.1	12	21	20	0	0	0	3.19232	5.15031	5.15158	0	0	0	8.39e-06	-4.50094	down
AT3G45650.1	80	112	96	2	3	3	21.2821	27.4683	24.7276	0.480821	0.713948	0.796608	4.89e-18	-4.49381	down
AT4G33720.1	640	730	967	38	19	21	170.257	179.035	249.079	9.1356	4.52167	5.57626	1.2e-77	-4.48967	down
AT5G19880.1	29	29	23	1	0	0	7.71478	7.11234	5.92431	0.240411	0	0	3.05e-07	-4.48281	down
AT5G33370.1	22	28	31	1	0	0	5.85259	6.86708	7.98494	0.240411	0	0	3.27e-07	-4.47808	down
AT5G51170.2	8	19	28	0	0	0	2.12821	4.65981	7.21221	0	0	0	1.28e-05	-4.45984	down
AT3G57260.1	31	50	60	0	2	1	8.24683	12.2627	15.4547	0	0.475965	0.265536	9.45e-10	-4.45319	down
ONT.5819.1	17	25	41	1	0	0	4.52246	6.13133	10.5607	0.240411	0	0	6.32e-07	-4.44988	down
AT5G59050.1	55	54	54	2	2	0	14.6315	13.2437	13.9093	0.480821	0.475965	0	1.36e-11	-4.44194	down
AT3G54340.1	23	28	26	1	0	0	6.11862	6.86708	6.69705	0.240411	0	0	5.03e-07	-4.42013	down
ONT.13290.3	14	14	20	0	0	0	3.72438	3.43354	5.15158	0	0	0	1.62e-05	-4.39586	down
AT5G50790.1	57	81	76	2	3	1	15.1635	19.8655	19.576	0.480821	0.713948	0.265536	5.11e-14	-4.39539	down
AT3G44550.1	77	89	101	3	2	3	20.4841	21.8275	26.0155	0.721232	0.475965	0.796608	5.2e-17	-4.39117	down
AT1G15630.1	21	13	14	0	0	0	5.58656	3.18829	3.6061	0	0	0	1.73e-05	-4.38769	down
ONT.12433.7	10	17	22	0	0	0	2.66027	4.1693	5.66673	0	0	0	1.79e-05	-4.3873	down
AT4G26950.2	34	40	60	3	0	0	9.04491	9.81012	15.4547	0.721232	0	0	2.67e-09	-4.38693	down
AT4G23150.1	12	21	15	0	0	0	3.19232	5.15031	3.86368	0	0	0	1.74e-05	-4.38437	down
ONT.14015.2	36	53	42	2	0	1	9.57697	12.9984	10.8183	0.480821	0	0.265536	1.08e-09	-4.38388	down
AT1G66390.1	35	46	49	1	1	1	9.31094	11.2816	12.6214	0.240411	0.237983	0.265536	1.01e-09	-4.38026	down
AT3G11402.2	32	36	33	1	1	0	8.51286	8.82911	8.5001	0.240411	0.237983	0	2.72e-08	-4.37032	down
ONT.2000.4	25	22	27	1	0	0	6.65067	5.39557	6.95463	0.240411	0	0	8.02e-07	-4.36806	down
AT2G04495.1	63	106	98	1	4	3	16.7597	25.9968	25.2427	0.240411	0.95193	0.796608	7.41e-16	-4.3642	down
AT1G13470.1	15	12	20	0	0	0	3.9904	2.94304	5.15158	0	0	0	1.99e-05	-4.36386	down
AT1G35310.1	77	103	110	2	3	4	20.4841	25.2611	28.3337	0.480821	0.713948	1.06214	7.55e-18	-4.36203	down
AT1G43910.1	228	253	255	5	11	10	60.6541	62.049	65.6826	1.20205	2.61781	2.65536	3.51e-43	-4.35857	down
ONT.18359.1	31	33	36	0	1	1	8.24683	8.09335	9.27284	0	0.237983	0.265536	3.29e-08	-4.35115	down
ONT.15597.1	16	12	18	0	0	0	4.25643	2.94304	4.63642	0	0	0	2.2e-05	-4.34578	down
ONT.9735.1	13	14	19	0	0	0	3.45835	3.43354	4.894	0	0	0	2.19e-05	-4.34559	down
AT5G40780.1	5079	5752	6167	260	189	203	1351.15	1410.7	1588.49	62.5068	44.9787	53.9038	0	-4.33316	down
ONT.12737.1	29	30	40	1	1	0	7.71478	7.35759	10.3032	0.240411	0.237983	0	4.83e-08	-4.33267	down
AT2G03720.1	51	76	81	5	0	1	13.5674	18.6392	20.8639	1.20205	0	0.265536	8.71e-13	-4.33127	down
AT2G40370.1	28	24	20	0	0	1	7.44875	5.88607	5.15158	0	0	0.265536	1.18e-06	-4.31987	down
AT5G50800.1	10	13	24	0	0	0	2.66027	3.18829	6.18189	0	0	0	2.8e-05	-4.31908	down
AT5G42610.1	9	23	15	0	0	0	2.39424	5.64082	3.86368	0	0	0	2.76e-05	-4.31861	down
AT3G04210.1	65	117	103	3	1	5	17.2917	28.6946	26.5306	0.721232	0.237983	1.32768	3.4e-16	-4.30741	down
ONT.2014.1	24	17	31	1	0	0	6.38464	4.1693	7.98494	0.240411	0	0	1.62e-06	-4.30546	down
AT1G76960.1	33	61	88	2	1	2	8.77889	14.9604	22.6669	0.480821	0.237983	0.531072	1.26e-10	-4.2871	down
AT4G28850.1	260	326	337	10	18	7	69.167	79.9525	86.8041	2.40411	4.28369	1.85875	1.27e-48	-4.27718	down
ONT.12671.1	16	13	14	0	0	0	4.25643	3.18829	3.6061	0	0	0	3.31e-05	-4.27433	down
ONT.16746.1	7	19	20	0	0	0	1.86219	4.65981	5.15158	0	0	0	3.79e-05	-4.27103	down
AT3G14380.1	18	17	9	0	0	0	4.78848	4.1693	2.31821	0	0	0	3.68e-05	-4.26528	down
AT2G18660.1	91	119	165	3	9	1	24.2084	29.1851	42.5005	0.721232	2.14184	0.265536	1.68e-18	-4.25319	down
AT4G22110.2	43	24	56	2	0	1	11.4392	5.88607	14.4244	0.480821	0	0.265536	1.96e-08	-4.24807	down
AT1G15240.3	11	18	13	0	0	0	2.9263	4.41455	3.34852	0	0	0	4.35e-05	-4.22972	down
AT1G10810.1	10	21	12	0	0	0	2.66027	5.15031	3.09095	0	0	0	4.52e-05	-4.22938	down
AT5G52760.1	95	121	119	6	2	4	25.2726	29.6756	30.6519	1.44246	0.475965	1.06214	1.15e-20	-4.2289	down
ONT.18734.2	20	11	11	0	0	0	5.32054	2.69778	2.83337	0	0	0	5.05e-05	-4.21153	down
ONT.11756.2	17	25	24	0	1	0	4.52246	6.13133	6.18189	0	0.237983	0	2.92e-06	-4.20825	down
AT2G43040.1	16	10	15	0	0	0	4.25643	2.45253	3.86368	0	0	0	5.14e-05	-4.20287	down
AT5G37600.1	3523	4783	5147	245	173	130	937.213	1173.05	1325.76	58.9006	41.171	34.5197	7.64e-57	-4.19999	down
AT1G35250.1	31	27	31	1	0	1	8.24683	6.62183	7.98494	0.240411	0	0.265536	1.57e-07	-4.19578	down
AT5G19930.1	14	7	22	0	0	0	3.72438	1.71677	5.66673	0	0	0	6.16e-05	-4.18947	down
ONT.4503.1	140	148	155	2	9	6	37.2438	36.2974	39.9247	0.480821	2.14184	1.59322	1.12e-26	-4.18925	down
ONT.16116.1	57	49	53	1	2	2	15.1635	12.0174	13.6517	0.240411	0.475965	0.531072	2.7e-11	-4.18126	down
AT4G26010.1	1063	1299	1512	56	69	39	282.787	318.584	389.459	13.463	16.4208	10.3559	1.46e-122	-4.17505	down
AT1G34047.1	14	10	16	0	0	0	3.72438	2.45253	4.12126	0	0	0	6.01e-05	-4.17478	down
AT1G07680.1	17	24	23	0	0	1	4.52246	5.88607	5.92431	0	0	0.265536	3.84e-06	-4.16576	down
AT2G18800.1	9	17	14	0	0	0	2.39424	4.1693	3.6061	0	0	0	6.51e-05	-4.16133	down
AT2G23960.1	13	12	14	0	0	0	3.45835	2.94304	3.6061	0	0	0	6.41e-05	-4.1589	down
AT4G33040.1	448	578	561	20	25	22	119.18	141.756	144.502	4.80821	5.94956	5.84179	7.09e-81	-4.15686	down
ONT.17102.1	12	15	12	0	0	0	3.19232	3.6788	3.09095	0	0	0	6.53e-05	-4.15538	down
ONT.3840.1	11	15	13	0	0	0	2.9263	3.6788	3.34852	0	0	0	6.62e-05	-4.15338	down
ONT.2000.3	29	30	26	0	1	1	7.71478	7.35759	6.69705	0	0.237983	0.265536	2.69e-07	-4.13375	down
AT2G47200.1	153	154	179	9	7	4	40.7021	37.769	46.1066	2.1637	1.66588	1.06214	4.78e-29	-4.11597	down
ONT.5394.2	223	255	259	6	9	16	59.324	62.5395	66.7129	1.44246	2.14184	4.24858	1.82e-41	-4.11571	down
AT3G18520.1	9	15	14	0	0	0	2.39424	3.6788	3.6061	0	0	0	8.61e-05	-4.10879	down
AT4G11190.1	295	264	303	14	9	14	78.4779	64.7468	78.0464	3.36575	2.14184	3.71751	4.2e-48	-4.10761	down
AT1G29860.1	34	43	53	3	0	1	9.04491	10.5459	13.6517	0.721232	0	0.265536	2.73e-09	-4.10408	down
AT5G38000.1	32	38	60	2	2	0	8.51286	9.31961	15.4547	0.480821	0.475965	0	5.82e-09	-4.09	down
AT1G74460.1	131	130	175	7	6	5	34.8495	31.8829	45.0763	1.68287	1.4279	1.32768	5.68e-25	-4.08968	down
AT5G57530.1	156	196	192	2	13	1	41.5002	48.0696	49.4551	0.480821	3.09377	0.265536	9.12e-08	-4.08832	down
AT2G22920.1	18	19	23	0	0	1	4.78848	4.65981	5.92431	0	0	0.265536	6.79e-06	-4.08794	down
AT1G27140.1	28	44	33	2	1	0	7.44875	10.7911	8.5001	0.480821	0.237983	0	3.88e-08	-4.08178	down
AT3G25010.1	14	9	14	0	0	0	3.72438	2.20728	3.6061	0	0	0	0.000101028	-4.08106	down
AT5G22300.1	426	599	594	31	22	19	113.327	146.907	153.002	7.45273	5.23562	5.04519	5.67e-71	-4.0807	down
AT4G20460.1	60	64	67	1	5	1	15.9616	15.6962	17.2578	0.240411	1.18991	0.265536	9.26e-13	-4.07131	down
ONT.597.3	35	27	43	1	0	2	9.31094	6.62183	11.0759	0.240411	0	0.531072	5.04e-08	-4.07119	down
AT4G21840.1	50	67	75	2	2	3	13.3013	16.432	19.3184	0.480821	0.475965	0.796608	1.25e-12	-4.06787	down
AT2G44110.2	44	53	49	2	3	0	11.7052	12.9984	12.6214	0.480821	0.713948	0	1.8e-10	-4.063	down
AT5G42500.1	127	139	159	6	7	5	33.7854	34.0902	40.955	1.44246	1.66588	1.32768	8.91e-26	-4.05907	down
AT3G51680.1	4	21	16	0	0	0	1.06411	5.15031	4.12126	0	0	0	0.000135707	-4.05569	down
AT4G08770.1	1115	1277	1286	76	54	41	296.62	313.188	331.246	18.2712	12.8511	10.887	7.05e-168	-4.04874	down
AT2G20520.1	101	113	122	5	7	2	26.8687	27.7136	31.4246	1.20205	1.66588	0.531072	8.45e-21	-4.04692	down
ONT.410.2	41	54	49	1	1	3	10.9071	13.2437	12.6214	0.240411	0.237983	0.796608	2.56e-10	-4.0324	down
ONT.6806.1	8	12	16	0	0	0	2.12821	2.94304	4.12126	0	0	0	0.000133162	-4.03233	down
ONT.10681.1	14	21	22	1	0	0	3.72438	5.15031	5.66673	0.240411	0	0	1.24e-05	-4.01598	down
AT4G12890.1	21	22	14	0	0	1	5.58656	5.39557	3.6061	0	0	0.265536	1.27e-05	-4.00819	down
AT3G29410.1	105	112	130	7	6	2	27.9328	27.4683	33.4852	1.68287	1.4279	0.531072	4.26e-21	-4.005	down
AT4G38560.1	18	48	39	3	0	0	4.78848	11.7721	10.0456	0.721232	0	0	3.46e-07	-4.00107	down
AT4G19030.1	431	536	430	26	21	19	114.658	131.456	110.759	6.25068	4.99763	5.04519	4.59e-75	-3.99746	down
AT5G44550.1	204	274	281	17	9	9	54.2695	67.1993	72.3796	4.08698	2.14184	2.38983	9.59e-40	-3.99402	down
ONT.11385.1	24	42	33	1	2	0	6.38464	10.3006	8.5001	0.240411	0.475965	0	1.13e-07	-3.99286	down
AT5G02570.1	13	10	11	0	0	0	3.45835	2.45253	2.83337	0	0	0	0.000160226	-3.99217	down
ONT.5303.1	12	13	9	0	0	0	3.19232	3.18829	2.31821	0	0	0	0.000164932	-3.98681	down
AT1G05250.1	670	770	909	50	31	34	178.238	188.845	234.139	12.0205	7.37746	9.02823	1.89e-91	-3.95905	down
AT1G28170.1	12	12	9	0	0	0	3.19232	2.94304	2.31821	0	0	0	0.00019557	-3.95408	down
AT1G15610.2	13	11	9	0	0	0	3.45835	2.69778	2.31821	0	0	0	0.000198055	-3.95238	down
AT2G23440.1	14	16	25	0	0	1	3.72438	3.92405	6.43947	0	0	0.265536	2.04e-05	-3.94967	down
AT5G45210.1	9	14	10	0	0	0	2.39424	3.43354	2.57579	0	0	0	0.000205329	-3.94566	down
AT5G01870.1	255	288	245	14	12	12	67.8368	70.6329	63.1068	3.36575	2.85579	3.18643	4.38e-47	-3.94427	down
ONT.19428.1	14	19	21	0	0	1	3.72438	4.65981	5.40915	0	0	0.265536	1.93e-05	-3.94349	down
AT2G35380.1	82	74	99	6	1	4	21.8142	18.1487	25.5003	1.44246	0.237983	1.06214	1.85e-15	-3.94107	down
AT2G03370.1	8	11	14	0	0	0	2.12821	2.69778	3.6061	0	0	0	0.000213058	-3.94057	down
AT2G46130.1	12	5	18	0	0	0	3.19232	1.22627	4.63642	0	0	0	0.00024077	-3.93541	down
ONT.12219.1	21	40	34	2	1	0	5.58656	9.81012	8.75768	0.480821	0.237983	0	2.54e-07	-3.92904	down
AT1G79320.1	137	159	168	10	6	6	36.4457	38.9952	43.2732	2.40411	1.4279	1.59322	5.7e-28	-3.92208	down
AT1G56320.1	49	59	64	3	1	3	13.0353	14.4699	16.485	0.721232	0.237983	0.796608	1.03e-11	-3.92126	down
ONT.4267.1	48	51	75	5	2	0	12.7693	12.5079	19.3184	1.20205	0.475965	0	8.47e-11	-3.91904	down
AT5G52320.1	12	26	16	1	0	0	3.19232	6.37658	4.12126	0.240411	0	0	2.77e-05	-3.91565	down
AT3G05858.1	31	41	40	3	1	0	8.24683	10.0554	10.3032	0.721232	0.237983	0	2e-08	-3.91316	down
ONT.7673.1	31	23	19	0	1	1	8.24683	5.64082	4.894	0	0.237983	0.265536	2.45e-06	-3.91168	down
AT4G15530.1	48	38	45	2	3	0	12.7693	9.31961	11.591	0.480821	0.713948	0	2.07e-09	-3.9103	down
ONT.3672.1	46	54	50	2	3	1	12.2372	13.2437	12.8789	0.480821	0.713948	0.265536	1.02e-10	-3.91003	down
AT3G19430.1	72	96	62	3	5	2	19.1539	23.5443	15.9699	0.721232	1.18991	0.531072	2.75e-14	-3.90722	down
AT3G03910.1	18	18	16	0	0	1	4.78848	4.41455	4.12126	0	0	0.265536	2.35e-05	-3.90711	down
ONT.6942.2	41	52	38	1	3	1	10.9071	12.7532	9.78799	0.240411	0.713948	0.265536	1.69e-09	-3.90483	down
ONT.2267.1	71	91	107	7	5	0	18.8879	22.318	27.5609	1.68287	1.18991	0	2.86e-15	-3.90478	down
AT5G64550.1	185	204	203	13	7	9	49.215	50.0316	52.2885	3.12534	1.66588	2.38983	7.38e-36	-3.90327	down
AT1G52060.1	28	40	24	1	1	1	7.44875	9.81012	6.18189	0.240411	0.237983	0.265536	2.45e-07	-3.8979	down
AT1G17745.1	596	688	629	37	29	32	158.552	168.734	162.017	8.89519	6.90149	8.49716	5.16e-107	-3.89655	down
AT5G41570.1	12	21	19	0	1	0	3.19232	5.15031	4.894	0	0.237983	0	2.99e-05	-3.88926	down
AT5G06510.1	19	26	26	2	0	0	5.05451	6.37658	6.69705	0.480821	0	0	3.07e-06	-3.88257	down
AT5G41300.1	9	10	12	0	0	0	2.39424	2.45253	3.09095	0	0	0	0.000284395	-3.88146	down
ONT.2000.5	11	18	23	0	1	0	2.9263	4.41455	5.92431	0	0.237983	0	3.56e-05	-3.87469	down
AT2G22510.1	221	231	256	13	16	7	58.7919	56.6534	65.9402	3.12534	3.80772	1.85875	1.32e-40	-3.86653	down
AT2G24400.1	21	21	10	0	1	0	5.58656	5.15031	2.57579	0	0.237983	0	3.91e-05	-3.86642	down
AT3G60280.1	62	84	96	6	3	2	16.4937	20.6013	24.7276	1.44246	0.713948	0.531072	1.33e-14	-3.86495	down
AT2G02580.1	47	46	52	2	2	2	12.5033	11.2816	13.3941	0.480821	0.475965	0.531072	2.01e-10	-3.8629	down
AT1G24145.1	28	41	39	2	1	1	7.44875	10.0554	10.0456	0.480821	0.237983	0.265536	3.13e-08	-3.86146	down
ONT.12620.1	31	29	28	2	1	0	8.24683	7.11234	7.21221	0.480821	0.237983	0	3.06e-07	-3.86014	down
AT5G06630.1	350	435	484	24	22	20	93.1094	106.685	124.668	5.76985	5.23562	5.31072	1.97e-61	-3.85599	down
AT4G19430.1	26	28	17	0	0	2	6.9167	6.86708	4.37884	0	0	0.531072	4.09e-06	-3.85481	down
AT4G23230.1	53	74	76	1	5	3	14.0994	18.1487	19.576	0.240411	1.18991	0.796608	8.21e-13	-3.85294	down
AT5G14650.1	26	33	50	2	1	1	6.9167	8.09335	12.8789	0.480821	0.237983	0.265536	6.99e-08	-3.85116	down
AT3G26830.1	95	111	126	10	2	4	25.2726	27.2231	32.4549	2.40411	0.475965	1.06214	5.6e-19	-3.84773	down
AT1G44170.1	12	13	6	0	0	0	3.19232	3.18829	1.54547	0	0	0	0.000349587	-3.84608	down
AT1G44010.1	11	11	8	0	0	0	2.9263	2.69778	2.06063	0	0	0	0.000349059	-3.83995	down
AT4G02270.1	269	296	352	16	18	14	71.5612	72.5949	90.6677	3.84657	4.28369	3.71751	2.07e-48	-3.83608	down
AT3G13650.1	282	334	356	12	24	15	75.0196	81.9145	91.6981	2.88493	5.71158	3.98304	1.59e-50	-3.83325	down
ONT.9057.1	23	18	27	1	1	0	6.11862	4.41455	6.95463	0.240411	0.237983	0	4.58e-06	-3.83182	down
AT1G35230.1	41	48	75	2	3	2	10.9071	11.7721	19.3184	0.480821	0.713948	0.531072	2.33e-10	-3.83102	down
AT3G27150.1	41	45	37	1	2	2	10.9071	11.0364	9.53042	0.240411	0.475965	0.531072	3.67e-09	-3.82367	down
ONT.1551.1	50	46	63	2	3	2	13.3013	11.2816	16.2275	0.480821	0.713948	0.531072	7.95e-11	-3.81299	down
ONT.10957.2	16	16	16	0	0	1	4.25643	3.92405	4.12126	0	0	0.265536	4.57e-05	-3.80523	down
AT5G38790.1	15	17	16	0	0	1	3.9904	4.1693	4.12126	0	0	0.265536	4.6e-05	-3.80391	down
ONT.9030.1	49	59	68	4	2	2	13.0353	14.4699	17.5154	0.961642	0.475965	0.531072	9.97e-12	-3.80279	down
AT1G18140.1	12	18	18	0	0	1	3.19232	4.41455	4.63642	0	0	0.265536	5.33e-05	-3.78931	down
AT5G26310.1	35	45	40	2	1	2	9.31094	11.0364	10.3032	0.480821	0.237983	0.531072	6.02e-09	-3.78797	down
AT3G49960.1	259	296	295	13	25	8	68.901	72.5949	75.9857	3.12534	5.94956	2.12429	1.49e-44	-3.7872	down
AT1G51913.1	163	137	193	12	8	6	43.3624	33.5997	49.7127	2.88493	1.90386	1.59322	2.26e-26	-3.78181	down
ONT.4075.3	8	7	14	0	0	0	2.12821	1.71677	3.6061	0	0	0	0.000498508	-3.77311	down
AT1G80120.1	17	24	24	1	0	1	4.52246	5.88607	6.18189	0.240411	0	0.265536	6.97e-06	-3.76646	down
ONT.5115.1	9	10	9	0	0	0	2.39424	2.45253	2.31821	0	0	0	0.000497513	-3.76572	down
AT4G23810.1	409	419	453	13	30	28	108.805	102.761	116.683	3.12534	7.13948	7.43501	1e-61	-3.76492	down
ONT.6542.2	110	94	124	4	8	5	29.263	23.0538	31.9398	0.961642	1.90386	1.32768	2.81e-19	-3.7585	down
AT5G23190.1	19	27	19	0	2	0	5.05451	6.62183	4.894	0	0.475965	0	8.48e-06	-3.75798	down
ONT.6764.2	9	17	22	0	1	0	2.39424	4.1693	5.66673	0	0.237983	0	7.96e-05	-3.75631	down
AT3G50160.1	8	12	8	0	0	0	2.12821	2.94304	2.06063	0	0	0	0.000536748	-3.75162	down
AT3G07520.1	14	17	15	0	0	1	3.72438	4.1693	3.86368	0	0	0.265536	6.61e-05	-3.74716	down
ONT.17695.1	30	28	23	1	1	1	7.98081	6.86708	5.92431	0.240411	0.237983	0.265536	8.82e-07	-3.74358	down
AT5G39130.1	11	11	6	0	0	0	2.9263	2.69778	1.54547	0	0	0	0.000573708	-3.73985	down
ONT.10113.2	10	12	6	0	0	0	2.66027	2.94304	1.54547	0	0	0	0.000581246	-3.73719	down
AT4G30640.1	6	16	7	0	0	0	1.59616	3.92405	1.80305	0	0	0	0.000618497	-3.73145	down
AT1G49960.1	17	23	24	0	0	2	4.52246	5.64082	6.18189	0	0	0.531072	1.01e-05	-3.72794	down
AT3G26790.1	11	19	16	0	0	1	2.9263	4.65981	4.12126	0	0	0.265536	7.97e-05	-3.7276	down
ONT.17483.2	21	11	14	0	1	0	5.58656	2.69778	3.6061	0	0.237983	0	8.96e-05	-3.72707	down
AT1G55210.2	25	17	21	1	0	1	6.65067	4.1693	5.40915	0.240411	0	0.265536	1.02e-05	-3.72605	down
ONT.5655.5	38	38	38	3	1	1	10.109	9.31961	9.78799	0.721232	0.237983	0.265536	1.44e-08	-3.72356	down
AT5G37980.1	16	14	15	0	0	1	4.25643	3.43354	3.86368	0	0	0.265536	7.84e-05	-3.72086	down
AT3G48850.1	16	18	30	0	1	1	4.25643	4.41455	7.72736	0	0.237983	0.265536	1.29e-05	-3.72021	down
AT4G19680.1	95	107	115	8	7	2	25.2726	26.2421	29.6216	1.92328	1.66588	0.531072	3.62e-19	-3.71595	down
ONT.1439.1	45	15	64	2	2	1	11.9712	3.6788	16.485	0.480821	0.475965	0.265536	6.13e-07	-3.71517	down
AT1G65790.1	27	34	36	4	0	0	7.18273	8.3386	9.27284	0.961642	0	0	3.61e-07	-3.69734	down
ONT.18343.2	4523	4218	4146	252	289	232	1203.24	1034.48	1067.92	60.5835	68.777	61.6044	0	-3.69386	down
AT3G07600.1	146	167	200	7	14	8	38.8399	40.9573	51.5158	1.68287	3.33176	2.12429	9.08e-28	-3.68845	down
AT1G04330.1	21	29	28	1	2	0	5.58656	7.11234	7.21221	0.240411	0.475965	0	1.75e-06	-3.68637	down
AT3G56710.1	239	252	321	14	16	17	63.5804	61.8038	82.6828	3.36575	3.80772	4.51411	5.59e-41	-3.68595	down
ONT.18750.1	206	223	243	14	14	11	54.8015	54.6914	62.5916	3.36575	3.33176	2.9209	2.36e-39	-3.68132	down
ONT.5970.2	12	10	5	0	0	0	3.19232	2.45253	1.28789	0	0	0	0.00077027	-3.67973	down
AT3G55150.1	110	99	100	5	9	3	29.263	24.28	25.7579	1.20205	2.14184	0.796608	9.36e-19	-3.67971	down
AT4G25790.1	53	92	105	4	7	2	14.0994	22.5633	27.0458	0.961642	1.66588	0.531072	3.93e-13	-3.67945	down
ONT.17049.2	10	8	8	0	0	0	2.66027	1.96202	2.06063	0	0	0	0.000757362	-3.6762	down
ONT.11253.1	17	8	20	0	1	0	4.52246	1.96202	5.15158	0	0.237983	0	0.000137962	-3.67336	down
AT5G39090.1	29	15	37	0	1	2	7.71478	3.6788	9.53042	0	0.237983	0.531072	4.52e-06	-3.67294	down
AT5G16900.1	6	7	14	0	0	0	1.59616	1.71677	3.6061	0	0	0	0.000801311	-3.67248	down
AT2G47950.1	22	21	35	2	1	0	5.85259	5.15031	9.01526	0.480821	0.237983	0	2.84e-06	-3.67139	down
ONT.6769.2	40	38	32	1	2	2	10.6411	9.31961	8.24252	0.240411	0.475965	0.531072	2.88e-08	-3.66774	down
ONT.15671.2	66	98	116	4	4	7	17.5578	24.0348	29.8791	0.961642	0.95193	1.85875	2.77e-15	-3.66636	down
ONT.3488.1	4	18	7	0	0	0	1.06411	4.41455	1.80305	0	0	0	0.000874093	-3.66559	down
ONT.9450.2	20	17	23	1	0	1	5.32054	4.1693	5.92431	0.240411	0	0.265536	1.53e-05	-3.66546	down
ONT.17156.1	16	27	37	1	0	2	4.25643	6.62183	9.53042	0.240411	0	0.531072	3.85e-06	-3.66435	down
AT5G09520.1	81	77	99	5	6	3	21.5482	18.8845	25.5003	1.20205	1.4279	0.796608	8.87e-16	-3.66302	down
AT3G16410.1	67	66	58	4	4	2	17.8238	16.1867	14.9396	0.961642	0.95193	0.531072	1.1e-12	-3.66247	down
ONT.4398.1	16	11	16	1	0	0	4.25643	2.69778	4.12126	0.240411	0	0	0.000123759	-3.66078	down
AT3G07070.1	44	53	45	2	4	1	11.7052	12.9984	11.591	0.480821	0.95193	0.265536	6.09e-10	-3.65878	down
AT1G22160.1	262	297	328	16	24	13	69.699	72.8401	84.4858	3.84657	5.71158	3.45197	6.9e-47	-3.6524	down
ONT.18705.2	12	13	18	0	0	1	3.19232	3.18829	4.63642	0	0	0.265536	0.000126902	-3.64968	down
AT4G22214.1	47	42	36	3	1	2	12.5033	10.3006	9.27284	0.721232	0.237983	0.531072	5.75e-09	-3.64955	down
ONT.2351.1	6	12	8	0	0	0	1.59616	2.94304	2.06063	0	0	0	0.000866329	-3.64928	down
ONT.5516.7	26	31	37	0	4	0	6.9167	7.60284	9.53042	0	0.95193	0	6.84e-07	-3.64516	down
ONT.5694.2	344	407	453	29	26	18	91.5132	99.818	116.683	6.97191	6.18755	4.77965	5.52e-59	-3.64352	down
AT5G58784.1	15	13	14	1	0	0	3.9904	3.18829	3.6061	0.240411	0	0	0.000132019	-3.64076	down
AT1G71740.1	23	32	38	2	0	2	6.11862	7.8481	9.78799	0.480821	0	0.531072	4.82e-07	-3.63863	down
AT4G39030.1	137	179	161	10	10	8	36.4457	43.9003	41.4702	2.40411	2.37983	2.12429	2.55e-28	-3.63724	down
ONT.1709.1	156	149	188	10	8	11	41.5002	36.5427	48.4248	2.40411	1.90386	2.9209	7.75e-28	-3.63515	down
AT5G05840.1	7	9	9	0	0	0	1.86219	2.20728	2.31821	0	0	0	0.000933196	-3.62885	down
AT1G53270.1	8	7	10	0	0	0	2.12821	1.71677	2.57579	0	0	0	0.000945055	-3.62686	down
AT1G19510.1	25	20	14	1	0	1	6.65067	4.90506	3.6061	0.240411	0	0.265536	2.35e-05	-3.62547	down
ONT.12307.1	18	11	13	0	1	0	4.78848	2.69778	3.34852	0	0.237983	0	0.000156968	-3.62373	down
ONT.4079.1	18	13	11	0	1	0	4.78848	3.18829	2.83337	0	0.237983	0	0.000156292	-3.62325	down
ONT.6306.2	36	49	55	1	4	2	9.57697	12.0174	14.1668	0.240411	0.95193	0.531072	2.04e-09	-3.62252	down
AT1G66090.1	28	37	42	3	2	0	7.44875	9.07436	10.8183	0.721232	0.475965	0	8.82e-08	-3.62132	down
AT5G57540.1	23	22	29	1	1	1	6.11862	5.39557	7.46979	0.240411	0.237983	0.265536	2.83e-06	-3.62049	down
ONT.14618.1	25	23	26	2	0	1	6.65067	5.64082	6.69705	0.480821	0	0.265536	2.95e-06	-3.61955	down
ONT.10077.1	34	27	16	3	0	0	9.04491	6.62183	4.12126	0.721232	0	0	7.44e-06	-3.61749	down
ONT.6591.2	6	14	6	0	0	0	1.59616	3.43354	1.54547	0	0	0	0.00102753	-3.616	down
ONT.16727.2	13	32	16	0	2	0	3.45835	7.8481	4.12126	0	0.475965	0	3.91e-05	-3.61141	down
AT3G59010.1	16	18	25	0	0	2	4.25643	4.41455	6.43947	0	0	0.531072	2.62e-05	-3.61134	down
AT1G68765.1	154	172	188	8	13	10	40.9681	42.1835	48.4248	1.92328	3.09377	2.65536	6.29e-30	-3.60689	down
ONT.2011.4	8	13	22	1	0	0	2.12821	3.18829	5.66673	0.240411	0	0	0.000209082	-3.60456	down
AT1G15460.1	10	5	10	0	0	0	2.66027	1.22627	2.57579	0	0	0	0.00107124	-3.60377	down
AT2G01430.1	7	6	12	0	0	0	1.86219	1.47152	3.09095	0	0	0	0.0010747	-3.6026	down
AT4G25760.1	62	71	52	7	2	1	16.4937	17.413	13.3941	1.68287	0.475965	0.265536	2.19e-11	-3.60107	down
ONT.8513.1	79	71	80	6	3	4	21.0161	17.413	20.6063	1.44246	0.713948	1.06214	1.33e-14	-3.60085	down
AT5G38550.1	68	61	70	6	1	4	18.0898	14.9604	18.0305	1.44246	0.237983	1.06214	1.62e-12	-3.59458	down
AT4G15620.1	122	130	132	8	7	8	32.4553	31.8829	34.0004	1.92328	1.66588	2.12429	8.51e-24	-3.5943	down
ONT.9682.1	498	528	602	43	30	30	132.481	129.494	155.062	10.3377	7.13948	7.96608	6.65e-78	-3.59358	down
ONT.6951.2	9	13	20	0	0	1	2.39424	3.18829	5.15158	0	0	0.265536	0.000203006	-3.58841	down
AT2G46860.1	19	26	13	2	0	0	5.05451	6.37658	3.34852	0.480821	0	0	3.71e-05	-3.58585	down
AT5G55930.1	846	950	954	59	65	53	225.059	232.99	245.73	14.1842	15.4689	14.0734	3.59e-143	-3.58029	down
AT4G26220.1	524	595	535	42	34	30	139.398	145.926	137.805	10.0972	8.09141	7.96608	7.25e-92	-3.57763	down
AT5G64890.1	111	146	156	11	5	9	29.529	35.8069	40.1823	2.64452	1.18991	2.38983	8.96e-23	-3.57396	down
AT1G75450.1	23	25	24	3	0	0	6.11862	6.13133	6.18189	0.721232	0	0	5.58e-06	-3.57297	down
AT4G35200.1	28	25	34	2	1	1	7.44875	6.13133	8.75768	0.480821	0.237983	0.265536	6.99e-07	-3.57175	down
AT5G19890.1	328	361	376	22	27	19	87.2568	88.5363	96.8496	5.28903	6.42553	5.04519	1.42e-59	-3.57011	down
AT2G23300.1	28	27	33	1	0	3	7.44875	6.62183	8.5001	0.240411	0	0.796608	8.13e-07	-3.56803	down
AT3G42180.1	15	10	15	0	1	0	3.9904	2.45253	3.86368	0	0.237983	0	0.000217265	-3.56534	down
ONT.16710.2	6	7	11	0	0	0	1.59616	1.71677	2.83337	0	0	0	0.00126658	-3.56307	down
AT2G28990.1	15	17	24	1	0	1	3.9904	4.1693	6.18189	0.240411	0	0.265536	3.48e-05	-3.56252	down
AT4G31320.1	5	16	5	0	0	0	1.33013	3.92405	1.28789	0	0	0	0.00134755	-3.56213	down
ONT.13382.1	46	28	30	3	0	2	12.2372	6.86708	7.72736	0.721232	0	0.531072	2.86e-07	-3.56166	down
AT2G23680.1	24	45	52	4	2	0	6.38464	11.0364	13.3941	0.961642	0.475965	0	1.3e-07	-3.55729	down
AT5G01550.1	83	82	88	9	3	3	22.0802	20.1107	22.6669	2.1637	0.713948	0.796608	2.44e-15	-3.5534	down
AT2G38390.1	227	292	251	11	21	17	60.3881	71.6139	64.6523	2.64452	4.99763	4.51411	1.6e-41	-3.55243	down
AT1G62980.1	287	357	377	13	23	29	76.3497	87.5553	97.1072	3.12534	5.4736	7.70055	7.27e-45	-3.55216	down
ONT.13536.1	5	11	8	0	0	0	1.33013	2.69778	2.06063	0	0	0	0.00133944	-3.55101	down
ONT.17283.1	22	22	12	1	0	1	5.85259	5.39557	3.09095	0.240411	0	0.265536	4.19e-05	-3.54847	down
ONT.12979.2	7	7	9	0	0	0	1.86219	1.71677	2.31821	0	0	0	0.00142516	-3.53225	down
AT2G43390.1	9	11	20	1	0	0	2.39424	2.69778	5.15158	0.240411	0	0	0.000296491	-3.53202	down
ONT.16313.2	7	9	7	0	0	0	1.86219	2.20728	1.80305	0	0	0	0.00142852	-3.53122	down
AT4G30320.1	16	13	28	0	0	2	4.25643	3.18829	7.21221	0	0	0.531072	6.11e-05	-3.52997	down
AT2G17080.1	51	70	54	5	4	1	13.5674	17.1677	13.9093	1.20205	0.95193	0.265536	3.22e-11	-3.52929	down
AT1G61790.1	371	442	419	20	35	26	98.696	108.402	107.926	4.80821	8.32939	6.90394	4.93e-64	-3.52863	down
AT3G59370.1	186	267	259	19	15	12	49.481	65.4826	66.7129	4.5678	3.56974	3.18643	7.24e-36	-3.52669	down
ONT.8706.1	12	8	20	1	0	0	3.19232	1.96202	5.15158	0.240411	0	0	0.000317138	-3.52642	down
AT3G11430.1	32	21	32	1	1	2	8.51286	5.15031	8.24252	0.240411	0.237983	0.531072	1.38e-06	-3.52552	down
AT3G62680.1	1052	1287	1441	79	118	55	279.86	315.641	371.171	18.9924	28.0819	14.6045	2.15e-80	-3.52515	down
ONT.18367.1	29	29	27	1	0	3	7.71478	7.11234	6.95463	0.240411	0	0.796608	1.14e-06	-3.52367	down
AT1G61930.1	50	64	78	1	5	5	13.3013	15.6962	20.0911	0.240411	1.18991	1.32768	2.22e-11	-3.52218	down
AT2G23540.1	97	105	105	12	3	4	25.8046	25.7516	27.0458	2.88493	0.713948	1.06214	1.62e-17	-3.51934	down
AT5G05500.1	282	380	372	21	25	22	75.0196	93.1961	95.8193	5.04862	5.94956	5.84179	2.62e-51	-3.51879	down
AT3G01730.1	17	21	33	0	1	2	4.52246	5.15031	8.5001	0	0.237983	0.531072	1.08e-05	-3.51874	down
ONT.1010.1	7	14	19	1	0	0	1.86219	3.43354	4.894	0.240411	0	0	0.000329793	-3.51816	down
ONT.9195.1	23	28	33	1	1	2	6.11862	6.86708	8.5001	0.240411	0.237983	0.531072	1.18e-06	-3.51511	down
AT3G63300.1	28	25	18	0	0	3	7.44875	6.13133	4.63642	0	0	0.796608	1.11e-05	-3.51198	down
ONT.10135.2	17	29	43	4	0	0	4.52246	7.11234	11.0759	0.961642	0	0	7.6e-06	-3.51007	down
ONT.10005.4	5	10	8	0	0	0	1.33013	2.45253	2.06063	0	0	0	0.00158703	-3.50963	down
AT3G05690.1	51	56	65	5	2	3	13.5674	13.7342	16.7426	1.20205	0.475965	0.796608	3.22e-11	-3.50808	down
AT1G28370.1	152	160	196	13	12	8	40.4361	39.2405	50.4854	3.12534	2.85579	2.12429	4.06e-28	-3.50625	down
ONT.4426.1	27	36	35	1	3	1	7.18273	8.82911	9.01526	0.240411	0.713948	0.265536	2.26e-07	-3.50446	down
ONT.9897.1	36	27	52	2	1	3	9.57697	6.62183	13.3941	0.480821	0.237983	0.796608	1.22e-07	-3.50093	down
AT3G62780.1	13	16	25	0	1	1	3.45835	3.92405	6.43947	0	0.237983	0.265536	6.05e-05	-3.49797	down
AT1G73810.1	23	29	32	1	0	3	6.11862	7.11234	8.24252	0.240411	0	0.796608	1.72e-06	-3.49773	down
AT4G22666.1	293	304	373	28	18	19	77.9459	74.5569	96.0769	6.7315	4.28369	5.04519	6e-47	-3.49498	down
ONT.7105.2	9	10	4	0	0	0	2.39424	2.45253	1.03032	0	0	0	0.00175297	-3.48959	down
AT1G73580.1	4	10	9	0	0	0	1.06411	2.45253	2.31821	0	0	0	0.00175671	-3.4887	down
AT4G13510.1	1779	2041	2090	153	130	125	473.262	500.561	538.34	36.7828	30.9377	33.192	5.47e-246	-3.48658	down
AT4G09060.2	7	8	7	0	0	0	1.86219	1.96202	1.80305	0	0	0	0.00174384	-3.48357	down
AT1G20510.2	4	11	8	0	0	0	1.06411	2.69778	2.06063	0	0	0	0.00180629	-3.48266	down
ONT.12280.2	55	42	43	2	4	2	14.6315	10.3006	11.0759	0.480821	0.95193	0.531072	1.98e-09	-3.48258	down
AT2G45200.2	6	8	8	0	0	0	1.59616	1.96202	2.06063	0	0	0	0.00178126	-3.47907	down
ONT.1024.4	32	29	21	3	1	0	8.51286	7.11234	5.40915	0.721232	0.237983	0	2.56e-06	-3.47761	down
AT4G11470.1	16	16	20	1	0	1	4.25643	3.92405	5.15158	0.240411	0	0.265536	5.7e-05	-3.4773	down
AT1G01660.1	14	17	21	1	1	0	3.72438	4.1693	5.40915	0.240411	0.237983	0	6.08e-05	-3.47704	down
ONT.4537.1	9	7	6	0	0	0	2.39424	1.71677	1.54547	0	0	0	0.0018074	-3.47665	down
AT5G48657.1	31	21	30	0	2	2	8.24683	5.15031	7.72736	0	0.475965	0.531072	2.48e-06	-3.47099	down
ONT.6775.2	6	6	10	0	0	0	1.59616	1.47152	2.57579	0	0	0	0.00190215	-3.46592	down
ONT.2120.4	5	8	9	0	0	0	1.33013	1.96202	2.31821	0	0	0	0.00189945	-3.46556	down
AT3G05390.1	31	25	25	2	0	2	8.24683	6.13133	6.43947	0.480821	0	0.531072	2.12e-06	-3.46492	down
ONT.16616.2	13	10	14	0	0	1	3.45835	2.45253	3.6061	0	0	0.265536	0.000366225	-3.46329	down
AT4G36610.1	25	29	42	2	1	2	6.65067	7.11234	10.8183	0.480821	0.237983	0.531072	5.15e-07	-3.4624	down
ONT.7000.3	10	5	7	0	0	0	2.66027	1.22627	1.80305	0	0	0	0.001945	-3.46183	down
AT2G29750.1	178	213	199	14	15	11	47.3528	52.2389	51.2582	3.36575	3.56974	2.9209	8.35e-35	-3.4593	down
ONT.11711.2	40	68	66	0	8	2	10.6411	16.6772	17.0002	0	1.90386	0.531072	6.31e-09	-3.45582	down
AT3G20460.1	18	16	17	1	0	1	4.78848	3.92405	4.37884	0.240411	0	0.265536	6.42e-05	-3.45547	down
AT2G29350.1	54	79	78	9	4	0	14.3655	19.375	20.0911	2.1637	0.95193	0	4.38e-11	-3.4478	down
AT4G38080.1	460	477	515	44	37	21	122.372	116.986	132.653	10.5781	8.80535	5.57626	8.53e-70	-3.44657	down
AT3G12240.1	5	11	6	0	0	0	1.33013	2.69778	1.54547	0	0	0	0.00209573	-3.44393	down
AT5G49770.1	18	12	21	1	1	0	4.78848	2.94304	5.40915	0.240411	0.237983	0	8.49e-05	-3.44338	down
ONT.1890.1	6	14	18	1	0	0	1.59616	3.43354	4.63642	0.240411	0	0	0.000511155	-3.44213	down
AT2G18150.1	11	13	12	0	1	0	2.9263	3.18829	3.09095	0	0.237983	0	0.00040944	-3.44119	down
AT5G09978.1	242	295	329	23	17	20	64.3785	72.3496	84.7434	5.52944	4.0457	5.31072	3.78e-43	-3.44059	down
AT3G01830.1	39	46	67	2	4	3	10.375	11.2816	17.2578	0.480821	0.95193	0.796608	1.92e-09	-3.43989	down
ONT.16785.1	16	7	14	1	0	0	4.25643	1.71677	3.6061	0.240411	0	0	0.000490725	-3.43942	down
AT1G68850.1	17	22	26	1	1	1	4.52246	5.39557	6.69705	0.240411	0.237983	0.265536	1.37e-05	-3.43926	down
AT2G19190.1	14	16	21	2	0	0	3.72438	3.92405	5.40915	0.480821	0	0	8.86e-05	-3.43864	down
AT1G14080.1	46	64	55	1	5	4	12.2372	15.6962	14.1668	0.240411	1.18991	1.06214	1.73e-10	-3.4352	down
AT3G53650.1	16	23	12	1	1	0	4.25643	5.64082	3.09095	0.240411	0.237983	0	8.98e-05	-3.43284	down
AT5G22410.1	85	99	104	9	5	5	22.6123	24.28	26.7882	2.1637	1.18991	1.32768	2.36e-17	-3.4328	down
AT3G18450.1	15	24	26	1	1	1	3.9904	5.88607	6.69705	0.240411	0.237983	0.265536	1.66e-05	-3.42889	down
AT2G46495.1	8	6	7	0	0	0	2.12821	1.47152	1.80305	0	0	0	0.00219348	-3.4281	down
AT2G17040.1	34	43	59	4	3	1	9.04491	10.5459	15.1971	0.961642	0.713948	0.265536	1.1e-08	-3.42753	down
AT2G16385.1	45	55	62	5	3	2	11.9712	13.4889	15.9699	1.20205	0.713948	0.531072	1.74e-10	-3.42308	down
ONT.11534.2	21	26	32	2	0	2	5.58656	6.37658	8.24252	0.480821	0	0.531072	3.58e-06	-3.42129	down
AT2G41710.3	12	6	4	0	0	0	3.19232	1.47152	1.03032	0	0	0	0.00235304	-3.42076	down
AT2G40750.1	50	60	68	1	4	6	13.3013	14.7152	17.5154	0.240411	0.95193	1.59322	7.66e-11	-3.41919	down
AT4G21200.1	6	9	6	0	0	0	1.59616	2.20728	1.54547	0	0	0	0.0022878	-3.418	down
ONT.585.4	19	8	10	0	0	1	5.05451	1.96202	2.57579	0	0	0.265536	0.000551694	-3.41713	down
ONT.15879.1	8	8	5	0	0	0	2.12821	1.96202	1.28789	0	0	0	0.00230257	-3.41711	down
AT4G27400.1	5	8	8	0	0	0	1.33013	1.96202	2.06063	0	0	0	0.0023061	-3.41652	down
ONT.4547.3	7	5	9	0	0	0	1.86219	1.22627	2.31821	0	0	0	0.00233031	-3.41534	down
AT1G17744.1	9	7	5	0	0	0	2.39424	1.71677	1.28789	0	0	0	0.00233559	-3.41444	down
AT1G30080.1	18	14	17	1	1	0	4.78848	3.43354	4.37884	0.240411	0.237983	0	9.49e-05	-3.40609	down
AT1G25240.1	10	5	6	0	0	0	2.66027	1.22627	1.54547	0	0	0	0.00244503	-3.40528	down
AT4G08400.1	6	5	10	0	0	0	1.59616	1.22627	2.57579	0	0	0	0.00245065	-3.40445	down
AT5G19410.1	14	10	11	1	0	0	3.72438	2.45253	2.83337	0.240411	0	0	0.00052478	-3.40237	down
AT3G20380.1	101	98	123	9	7	6	26.8687	24.0348	31.6822	2.1637	1.66588	1.59322	9.94e-19	-3.39923	down
AT4G28420.2	53	57	77	6	3	3	14.0994	13.9794	19.8336	1.44246	0.713948	0.796608	2.59e-11	-3.39647	down
AT5G57625.1	94	96	90	6	7	6	25.0065	23.5443	23.1821	1.44246	1.66588	1.59322	2.01e-17	-3.39548	down
ONT.6543.2	9	48	19	0	0	3	2.39424	11.7721	4.894	0	0	0.796608	0.000130257	-3.39269	down
AT2G29100.1	10	15	10	0	1	0	2.66027	3.6788	2.57579	0	0.237983	0	0.000551694	-3.3917	down
AT3G21180.1	19	16	14	2	0	0	5.05451	3.92405	3.6061	0.480821	0	0	0.000116777	-3.39165	down
AT1G01750.1	92	132	141	13	5	7	24.4745	32.3734	36.3186	3.12534	1.18991	1.85875	1.56e-18	-3.3915	down
AT1G67360.2	512	635	625	35	59	35	136.206	155.736	160.987	8.41437	14.041	9.29376	2e-72	-3.3912	down
AT4G17660.1	5	16	16	1	0	0	1.33013	3.92405	4.12126	0.240411	0	0	0.000693958	-3.39054	down
ONT.17741.1	789	902	1130	83	67	57	209.895	221.218	291.064	19.9541	15.9448	15.1356	2.75e-83	-3.38799	down
ONT.2248.1	13	14	22	1	0	1	3.45835	3.43354	5.66673	0.240411	0	0.265536	0.000124202	-3.38054	down
AT1G34040.1	67	73	99	5	6	5	17.8238	17.9035	25.5003	1.20205	1.4279	1.32768	8.43e-14	-3.38002	down
AT2G47800.1	102	126	121	7	4	13	27.1347	30.9019	31.167	1.68287	0.95193	3.45197	5.88e-19	-3.37922	down
AT1G59940.1	72	52	49	3	2	6	19.1539	12.7532	12.6214	0.721232	0.475965	1.59322	2.9e-10	-3.37755	down
AT1G30900.1	82	103	106	8	5	7	21.8142	25.2611	27.3034	1.92328	1.18991	1.85875	3.14e-17	-3.37567	down
ONT.492.2	28	31	18	2	0	2	7.44875	7.60284	4.63642	0.480821	0	0.531072	6.28e-06	-3.37558	down
ONT.472.1	11	17	21	1	0	1	2.9263	4.1693	5.40915	0.240411	0	0.265536	0.000129195	-3.37542	down
AT5G54050.1	7	7	6	0	0	0	1.86219	1.71677	1.54547	0	0	0	0.00271641	-3.37374	down
AT2G39040.1	65	83	63	5	8	1	17.2917	20.356	16.2275	1.20205	1.90386	0.265536	2.69e-12	-3.37354	down
ONT.16951.3	6	6	8	0	0	0	1.59616	1.47152	2.06063	0	0	0	0.00276751	-3.36993	down
AT5G26080.1	6	8	6	0	0	0	1.59616	1.96202	1.54547	0	0	0	0.00277782	-3.36856	down
AT2G21650.1	8	17	10	0	1	0	2.12821	4.1693	2.57579	0	0.237983	0	0.000674314	-3.3663	down
AT1G80133.1	8	5	7	0	0	0	2.12821	1.22627	1.80305	0	0	0	0.00282796	-3.36567	down
AT4G15417.1	25	23	27	1	3	0	6.65067	5.64082	6.95463	0.240411	0.713948	0	5.8e-06	-3.36557	down
AT2G28440.1	5	8	7	0	0	0	1.33013	1.96202	1.80305	0	0	0	0.00284864	-3.36293	down
AT5G09300.1	44	41	32	0	3	4	11.7052	10.0554	8.24252	0	0.713948	1.06214	8.41e-08	-3.35963	down
AT5G04960.1	197	255	261	17	16	19	52.4073	62.5395	67.2281	4.08698	3.80772	5.04519	3.66e-37	-3.35963	down
AT4G01700.1	2021	2304	2302	210	148	143	537.64	565.063	592.946	50.4862	35.2214	37.9717	1.8e-216	-3.35738	down
AT3G15518.1	243	288	283	28	16	16	64.6445	70.6329	72.8948	6.7315	3.80772	4.24858	3.02e-43	-3.35737	down
AT2G39530.1	384	443	490	41	24	33	102.154	108.647	126.214	9.85684	5.71158	8.76269	2e-58	-3.35385	down
AT2G19150.1	17	15	16	0	0	2	4.52246	3.6788	4.12126	0	0	0.531072	0.000137384	-3.35222	down
AT4G15290.1	14	12	8	0	1	0	3.72438	2.94304	2.06063	0	0.237983	0	0.000699206	-3.35167	down
AT5G52260.1	24	26	38	2	2	1	6.38464	6.37658	9.78799	0.480821	0.475965	0.265536	1.51e-06	-3.35139	down
AT2G18370.1	214	248	271	18	14	22	56.9297	60.8227	69.8039	4.32739	3.33176	5.84179	5.47e-38	-3.34694	down
AT4G00680.1	138	178	179	11	17	8	36.7117	43.655	46.1066	2.64452	4.0457	2.12429	1.56e-26	-3.34679	down
AT1G15520.1	4	8	8	0	0	0	1.06411	1.96202	2.06063	0	0	0	0.00308212	-3.34581	down
AT1G09090.1	47	29	39	1	3	3	12.5033	7.11234	10.0456	0.240411	0.713948	0.796608	1.12e-07	-3.34498	down
AT3G23120.1	12	8	14	0	0	1	3.19232	1.96202	3.6061	0	0	0.265536	0.000717879	-3.344	down
ONT.10126.3	8	10	16	1	0	0	2.12821	2.45253	4.12126	0.240411	0	0	0.000770397	-3.34116	down
AT4G33330.1	22	28	24	3	0	1	5.85259	6.86708	6.18189	0.721232	0	0.265536	7.03e-06	-3.34048	down
ONT.4576.2	80	28	56	6	0	4	21.2821	6.86708	14.4244	1.44246	0	1.06214	2.67e-07	-3.33866	down
AT2G03590.1	15	15	17	0	2	0	3.9904	3.6788	4.37884	0	0.475965	0	0.000156887	-3.33838	down
AT5G57123.1	37	47	42	2	3	3	9.84299	11.5269	10.8183	0.480821	0.713948	0.796608	9.24e-09	-3.33549	down
AT1G55940.1	11	7	16	1	0	0	2.9263	1.71677	4.12126	0.240411	0	0	0.000824707	-3.33482	down
ONT.13652.1	22	23	16	3	0	0	5.85259	5.64082	4.12126	0.721232	0	0	4.43e-05	-3.33474	down
AT5G51060.1	28	36	36	2	4	0	7.44875	8.82911	9.27284	0.480821	0.95193	0	4.29e-07	-3.33339	down
ONT.13445.2	11	20	16	1	1	0	2.9263	4.90506	4.12126	0.240411	0.237983	0	0.000167048	-3.33109	down
AT2G28250.1	13	11	9	1	0	0	3.45835	2.69778	2.31821	0.240411	0	0	0.000772369	-3.32664	down
ONT.574.4	37	10	18	1	0	2	9.84299	2.45253	4.63642	0.240411	0	0.531072	0.000109209	-3.32513	down
ONT.11613.1	28	23	23	4	0	0	7.44875	5.64082	5.92431	0.961642	0	0	1.38e-05	-3.32428	down
AT1G34510.1	80	75	99	9	6	3	21.2821	18.394	25.5003	2.1637	1.4279	0.796608	2.15e-14	-3.32223	down
AT5G22520.1	22	23	28	2	0	2	5.85259	5.64082	7.21221	0.480821	0	0.531072	7.79e-06	-3.32163	down
AT3G14510.1	6	6	7	0	0	0	1.59616	1.47152	1.80305	0	0	0	0.00341926	-3.3153	down
AT1G55760.1	251	309	334	25	25	18	66.7727	75.7832	86.0313	6.01027	5.94956	4.77965	2.16e-44	-3.3147	down
AT5G47330.1	33	40	51	3	3	2	8.77889	9.81012	13.1365	0.721232	0.713948	0.531072	2.57e-08	-3.30816	down
AT2G18410.2	22	31	21	0	4	0	5.85259	7.60284	5.40915	0	0.95193	0	1.73e-05	-3.30579	down
AT4G25190.2	5	8	6	0	0	0	1.33013	1.96202	1.54547	0	0	0	0.0035845	-3.30391	down
ONT.5793.1	5	8	6	0	0	0	1.33013	1.96202	1.54547	0	0	0	0.0035845	-3.30391	down
ONT.1282.1	32	41	37	3	2	2	8.51286	10.0554	9.53042	0.721232	0.475965	0.531072	7.03e-08	-3.30274	down
AT4G39210.1	113	130	148	9	8	12	30.061	31.8829	38.1217	2.1637	1.90386	3.18643	1.05e-21	-3.2995	down
AT5G64905.1	129	161	191	20	9	7	34.3175	39.4857	49.1976	4.80821	2.14184	1.85875	8.92e-22	-3.298	down
ONT.12358.2	81	81	88	7	3	8	21.5482	19.8655	22.6669	1.68287	0.713948	2.12429	8.28e-15	-3.29543	down
ONT.5313.1	16	16	14	0	0	2	4.25643	3.92405	3.6061	0	0	0.531072	0.000198055	-3.29441	down
ONT.9322.3	9	5	5	0	0	0	2.39424	1.22627	1.28789	0	0	0	0.00376429	-3.29411	down
AT1G17285.1	23	16	19	1	1	1	6.11862	3.92405	4.894	0.240411	0.237983	0.265536	4.35e-05	-3.29095	down
AT1G63450.1	14	15	16	0	1	1	3.72438	3.6788	4.12126	0	0.237983	0.265536	0.000190679	-3.28794	down
AT5G05340.1	29	40	41	5	1	1	7.71478	9.81012	10.5607	1.20205	0.237983	0.265536	2.21e-07	-3.28677	down
AT5G60770.1	4	6	9	0	0	0	1.06411	1.47152	2.31821	0	0	0	0.00390396	-3.28498	down
ONT.15279.4	146	152	151	8	11	15	38.8399	37.2785	38.8944	1.92328	2.61781	3.98304	1.29e-25	-3.28453	down
AT4G25560.1	11	17	17	1	1	0	2.9263	4.1693	4.37884	0.240411	0.237983	0	0.000219238	-3.28208	down
AT2G35840.3	26	37	21	2	2	1	6.9167	9.07436	5.40915	0.480821	0.475965	0.265536	3.01e-06	-3.28024	down
AT4G29690.1	25	35	36	2	3	1	6.65067	8.58386	9.27284	0.480821	0.713948	0.265536	5.95e-07	-3.27956	down
AT1G48930.1	85	92	106	8	8	5	22.6123	22.5633	27.3034	1.92328	1.90386	1.32768	1.2e-16	-3.27745	down
AT5G53820.1	109	112	100	10	5	9	28.9969	27.4683	25.7579	2.40411	1.18991	2.38983	7.77e-19	-3.27706	down
ONT.11997.1	8	10	14	0	1	0	2.12821	2.45253	3.6061	0	0.237983	0	0.00102753	-3.27458	down
ONT.18735.1	4	5	10	0	0	0	1.06411	1.22627	2.57579	0	0	0	0.00417473	-3.26986	down
AT2G30580.1	13	12	20	0	1	1	3.45835	2.94304	5.15158	0	0.237983	0.265536	0.00024754	-3.26945	down
AT1G61450.1	21	16	20	2	1	0	5.58656	3.92405	5.15158	0.480821	0.237983	0	5.63e-05	-3.26851	down
ONT.3420.1	8	9	15	1	0	0	2.12821	2.20728	3.86368	0.240411	0	0	0.00109721	-3.26815	down
AT2G32990.1	52	51	55	4	7	0	13.8334	12.5079	14.1668	0.961642	1.66588	0	1.88e-09	-3.2662	down
AT1G78410.1	38	39	42	3	3	2	10.109	9.56487	10.8183	0.721232	0.713948	0.531072	2.42e-08	-3.26344	down
AT1G14960.1	424	607	607	57	35	38	112.795	148.869	156.35	13.7034	8.32939	10.0904	1.12e-54	-3.26114	down
AT4G11290.1	312	268	277	24	30	14	83.0004	65.7278	71.3493	5.76985	7.13948	3.71751	4.58e-41	-3.25893	down
AT5G26320.1	10	24	12	0	1	1	2.66027	5.88607	3.09095	0	0.237983	0.265536	0.000315018	-3.25657	down
AT1G58225.1	6	6	6	0	0	0	1.59616	1.47152	1.54547	0	0	0	0.00430055	-3.25513	down
AT5G61560.2	21	21	15	0	2	1	5.58656	5.15031	3.86368	0	0.475965	0.265536	6.11e-05	-3.2542	down
AT2G46400.1	38	27	42	2	4	1	10.109	6.62183	10.8183	0.480821	0.95193	0.265536	3.38e-07	-3.25328	down
AT4G39795.1	101	108	119	5	13	7	26.8687	26.4873	30.6519	1.20205	3.09377	1.85875	3.38e-18	-3.25032	down
ONT.12686.1	4	11	19	0	1	0	1.06411	2.69778	4.894	0	0.237983	0	0.00151804	-3.24886	down
ONT.12437.1	57	79	73	4	2	9	15.1635	19.375	18.8033	0.961642	0.475965	2.38983	1.63e-11	-3.24835	down
AT4G23610.1	24	23	22	0	2	2	6.38464	5.64082	5.66673	0	0.475965	0.531072	1.38e-05	-3.24654	down
ONT.12482.2	10	10	11	0	0	1	2.66027	2.45253	2.83337	0	0	0.265536	0.00110931	-3.24411	down
AT2G32270.1	124	150	148	11	15	7	32.9873	36.788	38.1217	2.64452	3.56974	1.85875	1.26e-23	-3.24113	down
AT3G14395.1	5	5	8	0	0	0	1.33013	1.22627	2.06063	0	0	0	0.00457439	-3.2408	down
AT3G56230.1	53	45	70	3	4	5	14.0994	11.0364	18.0305	0.721232	0.95193	1.32768	5.65e-10	-3.23794	down
AT3G11370.1	13	7	11	1	0	0	3.45835	1.71677	2.83337	0.240411	0	0	0.00128	-3.23558	down
AT2G23630.1	10	18	16	0	1	1	2.66027	4.41455	4.12126	0	0.237983	0.265536	0.000296684	-3.23556	down
AT3G01990.1	18	19	19	0	1	2	4.78848	4.65981	4.894	0	0.237983	0.531072	6.3e-05	-3.23383	down
AT1G54970.1	221	243	259	15	27	16	58.7919	59.5965	66.7129	3.60616	6.42553	4.24858	2.1e-37	-3.23314	down
AT2G04680.1	6	16	10	0	0	1	1.59616	3.92405	2.57579	0	0	0.265536	0.00137356	-3.22629	down
AT5G45380.1	422	487	409	41	40	27	112.263	119.438	105.35	9.85684	9.5193	7.16948	1.57e-67	-3.2239	down
AT1G47510.1	14	12	17	1	0	1	3.72438	2.94304	4.37884	0.240411	0	0.265536	0.000303372	-3.22371	down
AT3G09010.1	68	69	75	7	4	5	18.0898	16.9225	19.3184	1.68287	0.95193	1.32768	5.08e-13	-3.22086	down
AT1G66450.1	4	5	9	0	0	0	1.06411	1.22627	2.31821	0	0	0	0.00497088	-3.22048	down
ONT.4461.3	16	21	31	1	2	1	4.25643	5.15031	7.98494	0.240411	0.475965	0.265536	2.62e-05	-3.21214	down
AT3G25882.1	64	79	122	5	7	8	17.0257	19.375	31.4246	1.20205	1.66588	2.12429	1.27e-12	-3.21205	down
AT1G53680.1	11	13	19	0	1	1	2.9263	3.18829	4.894	0	0.237983	0.265536	0.000352225	-3.20894	down
AT5G09530.1	247	269	309	33	11	23	65.7086	65.9731	79.5919	7.93355	2.61781	6.10733	2.41e-32	-3.20885	down
ONT.15451.2	15	10	6	0	1	0	3.9904	2.45253	1.54547	0	0.237983	0	0.00153471	-3.20877	down
AT3G47090.1	11	19	13	0	1	1	2.9263	4.65981	3.34852	0	0.237983	0.265536	0.000345362	-3.20692	down
AT3G28550.1	208	206	198	21	20	9	55.3336	50.5221	51.0006	5.04862	4.75965	2.38983	5.62e-33	-3.20666	down
ONT.4606.2	26	23	18	1	1	2	6.9167	5.64082	4.63642	0.240411	0.237983	0.531072	1.97e-05	-3.20646	down
AT1G59171.1	8	7	16	0	1	0	2.12821	1.71677	4.12126	0	0.237983	0	0.00156621	-3.20642	down
ONT.18177.5	6	6	21	0	1	0	1.59616	1.47152	5.40915	0	0.237983	0	0.00191817	-3.20515	down
AT5G43250.1	10	17	16	2	0	0	2.66027	4.1693	4.12126	0.480821	0	0	0.000405163	-3.20301	down
AT1G05830.1	29	30	22	5	0	0	7.71478	7.35759	5.66673	1.20205	0	0	1.64e-05	-3.20153	down
AT2G47540.1	112	176	126	12	12	9	29.795	43.1645	32.4549	2.88493	2.85579	2.38983	4.94e-21	-3.19999	down
AT1G11655.1	14	13	15	0	1	1	3.72438	3.18829	3.86368	0	0.237983	0.265536	0.000337991	-3.19717	down
ONT.9399.1	243	274	328	31	23	16	64.6445	67.1993	84.4858	7.45273	5.4736	4.24858	9.43e-38	-3.19361	down
ONT.13394.2	47	22	48	2	3	3	12.5033	5.39557	12.3638	0.480821	0.713948	0.796608	6.09e-07	-3.19357	down
ONT.14216.2	13	7	10	0	1	0	3.45835	1.71677	2.57579	0	0.237983	0	0.00155822	-3.19294	down
AT1G35210.1	159	156	200	16	12	14	42.2983	38.2595	51.5158	3.84657	2.85579	3.71751	1.42e-26	-3.19264	down
AT1G74500.1	56	54	51	4	3	5	14.8975	13.2437	13.1365	0.961642	0.713948	1.32768	2.42e-10	-3.19222	down
ONT.2000.2	12	34	28	0	0	4	3.19232	8.3386	7.21221	0	0	1.06214	0.000100233	-3.19068	down
AT1G12040.1	82	99	97	8	8	6	21.8142	24.28	24.9851	1.92328	1.90386	1.59322	1.64e-16	-3.19004	down
ONT.15090.1	6	5	6	0	0	0	1.59616	1.22627	1.54547	0	0	0	0.00547545	-3.1891	down
AT3G61280.2	6	24	32	0	3	0	1.59616	5.88607	8.24252	0	0.713948	0	0.000438135	-3.18808	down
AT1G12950.1	43	62	57	2	6	4	11.4392	15.2057	14.682	0.480821	1.4279	1.06214	7.52e-10	-3.18722	down
ONT.17255.2	8	13	9	0	0	1	2.12821	3.18829	2.31821	0	0	0.265536	0.00151908	-3.18559	down
AT4G22217.1	18	13	11	1	0	1	4.78848	3.18829	2.83337	0.240411	0	0.265536	0.000402952	-3.18464	down
AT4G21380.1	49	63	73	6	3	5	13.0353	15.4509	18.8033	1.44246	0.713948	1.32768	6.74e-11	-3.18461	down
ONT.15308.2	8	14	8	0	1	0	2.12821	3.43354	2.06063	0	0.237983	0	0.00160266	-3.1841	down
AT5G60142.1	5	5	7	0	0	0	1.33013	1.22627	1.80305	0	0	0	0.00559676	-3.18351	down
AT1G66270.1	1093	1425	1036	142	93	56	290.767	349.486	266.852	34.1383	22.1324	14.87	2.7e-21	-3.18325	down
AT5G50200.1	507	569	600	62	46	34	134.876	139.549	154.547	14.9055	10.9472	9.02823	1.1e-72	-3.18182	down
AT4G14450.1	21	24	20	1	2	1	5.58656	5.88607	5.15158	0.240411	0.475965	0.265536	2.23e-05	-3.17647	down
ONT.18599.1	28	21	28	2	1	2	7.44875	5.15031	7.21221	0.480821	0.237983	0.531072	6.8e-06	-3.17412	down
AT4G16350.1	14	20	19	1	1	1	3.72438	4.90506	4.894	0.240411	0.237983	0.265536	9.94e-05	-3.16761	down
AT4G18630.1	51	54	42	3	3	5	13.5674	13.2437	10.8183	0.721232	0.713948	1.32768	2.07e-09	-3.16466	down
AT2G02850.1	35	47	41	4	3	2	9.31094	11.5269	10.5607	0.961642	0.713948	0.531072	2.85e-08	-3.16446	down
ONT.15003.1	20	26	19	1	3	0	5.32054	6.37658	4.894	0.240411	0.713948	0	3.45e-05	-3.16178	down
ONT.14223.3	12	9	8	1	0	0	3.19232	2.20728	2.06063	0.240411	0	0	0.00174689	-3.16173	down
AT3G62280.1	68	61	62	7	5	3	18.0898	14.9604	15.9699	1.68287	1.18991	0.796608	1.21e-11	-3.15785	down
AT3G11390.1	11	9	9	0	0	1	2.9263	2.20728	2.31821	0	0	0.265536	0.00170404	-3.15743	down
AT1G10657.3	12	12	17	0	1	1	3.19232	2.94304	4.37884	0	0.237983	0.265536	0.000455366	-3.15644	down
AT3G10710.1	29	46	49	3	5	1	7.71478	11.2816	12.6214	0.721232	1.18991	0.265536	1.14e-07	-3.1564	down
AT2G03505.1	13	8	8	1	0	0	3.45835	1.96202	2.06063	0.240411	0	0	0.00186177	-3.154	down
AT2G32680.1	12	13	16	0	2	0	3.19232	3.18829	4.12126	0	0.475965	0	0.000507041	-3.15248	down
ONT.1814.1	6	15	23	2	0	0	1.59616	3.6788	5.92431	0.480821	0	0	0.000842946	-3.15153	down
AT5G47635.1	18	17	17	1	1	1	4.78848	4.1693	4.37884	0.240411	0.237983	0.265536	0.000105019	-3.15147	down
AT1G50580.1	9	15	6	0	0	1	2.39424	3.6788	1.54547	0	0	0.265536	0.00192623	-3.15142	down
ONT.843.1	9	7	13	1	0	0	2.39424	1.71677	3.34852	0.240411	0	0	0.00190253	-3.15073	down
AT1G30850.1	22	13	18	0	2	1	5.85259	3.18829	4.63642	0	0.475965	0.265536	0.000147838	-3.14974	down
ONT.11612.2	14	20	8	1	0	1	3.72438	4.90506	2.06063	0.240411	0	0.265536	0.000567446	-3.14947	down
ONT.1974.2	38	41	31	3	3	2	10.109	10.0554	7.98494	0.721232	0.713948	0.531072	1.32e-07	-3.14824	down
AT1G76990.2	7	13	9	1	0	0	1.86219	3.18829	2.31821	0.240411	0	0	0.00189839	-3.14691	down
ONT.17450.2	45	40	50	3	1	6	11.9712	9.81012	12.8789	0.721232	0.237983	1.59322	2.58e-08	-3.14624	down
AT2G20110.2	10	7	12	0	0	1	2.66027	1.71677	3.09095	0	0	0.265536	0.00187735	-3.14509	down
AT5G19240.1	502	556	572	53	49	40	133.545	136.361	147.335	12.7418	11.6611	10.6214	5.51e-82	-3.14194	down
ONT.11488.1	11	19	11	1	0	1	2.9263	4.65981	2.83337	0.240411	0	0.265536	0.000530435	-3.13978	down
AT3G51450.1	22	25	17	1	3	0	5.85259	6.13133	4.37884	0.240411	0.713948	0	4.37e-05	-3.13866	down
AT2G41810.1	32	32	34	1	3	3	8.51286	7.8481	8.75768	0.240411	0.713948	0.796608	5.66e-07	-3.13761	down
ONT.9282.1	6	13	10	1	0	0	1.59616	3.18829	2.57579	0.240411	0	0	0.00203557	-3.13702	down
AT5G67400.1	506	577	646	51	51	49	134.61	141.511	166.396	12.2609	12.1371	13.0113	3.04e-74	-3.13459	down
ONT.6866.1	16	22	27	1	0	3	4.25643	5.39557	6.95463	0.240411	0	0.796608	5.12e-05	-3.13168	down
AT1G64590.1	51	61	65	5	4	5	13.5674	14.9604	16.7426	1.20205	0.95193	1.32768	6.23e-11	-3.13083	down
AT5G63580.1	27	26	34	3	0	3	7.18273	6.37658	8.75768	0.721232	0	0.796608	3.81e-06	-3.12986	down
AT5G23030.1	16	12	12	2	0	0	4.25643	2.94304	3.09095	0.480821	0	0	0.000618993	-3.12237	down
AT1G27740.1	33	56	43	3	5	2	8.77889	13.7342	11.0759	0.721232	1.18991	0.531072	3.51e-08	-3.12034	down
AT1G58936.1	5	6	5	0	0	0	1.33013	1.47152	1.28789	0	0	0	0.00700524	-3.1193	down
AT4G09990.1	17	39	32	3	3	0	4.52246	9.56487	8.24252	0.721232	0.713948	0	1.04e-05	-3.11776	down
AT2G04450.1	10	15	15	2	0	0	2.66027	3.6788	3.86368	0.480821	0	0	0.000648804	-3.115	down
ONT.10882.2	18	11	11	0	1	1	4.78848	2.69778	2.83337	0	0.237983	0.265536	0.000620557	-3.11485	down
AT4G11350.1	7	10	11	1	0	0	1.86219	2.45253	2.83337	0.240411	0	0	0.00216266	-3.11435	down
AT1G30870.1	238	282	339	22	28	25	63.3144	69.1613	87.3192	5.28903	6.66351	6.6384	1.94e-37	-3.11374	down
AT4G21902.1	4	6	6	0	0	0	1.06411	1.47152	1.54547	0	0	0	0.00720624	-3.11204	down
AT5G26700.1	4	6	6	0	0	0	1.06411	1.47152	1.54547	0	0	0	0.00720624	-3.11204	down
ONT.18494.2	4	6	6	0	0	0	1.06411	1.47152	1.54547	0	0	0	0.00720624	-3.11204	down
AT4G22212.1	479	468	548	48	47	38	127.427	114.778	141.153	11.5397	11.1852	10.0904	4.91e-68	-3.1105	down
AT1G12560.1	145	161	179	14	20	8	38.5739	39.4857	46.1066	3.36575	4.75965	2.12429	1.11e-24	-3.10948	down
ONT.6283.1	8	11	9	0	0	1	2.12821	2.69778	2.31821	0	0	0.265536	0.00213014	-3.1086	down
AT2G38600.1	5	7	4	0	0	0	1.33013	1.71677	1.03032	0	0	0	0.00737088	-3.10604	down
AT2G35700.1	4	7	5	0	0	0	1.06411	1.71677	1.28789	0	0	0	0.00737382	-3.10572	down
ONT.18793.1	4	7	5	0	0	0	1.06411	1.71677	1.28789	0	0	0	0.00737382	-3.10572	down
ONT.16670.1	13	18	9	0	1	1	3.45835	4.41455	2.31821	0	0.237983	0.265536	0.000657729	-3.10403	down
AT3G62210.1	22	19	33	3	2	0	5.85259	4.65981	8.5001	0.721232	0.475965	0	2.4e-05	-3.10354	down
AT2G31865.2	73	80	85	0	9	10	19.42	19.6202	21.8942	0	2.14184	2.65536	1.62e-10	-3.10258	down
AT1G65481.1	83	70	75	10	6	3	22.0802	17.1677	19.3184	2.40411	1.4279	0.796608	9.7e-13	-3.10079	down
AT5G45000.1	31	37	39	1	4	3	8.24683	9.07436	10.0456	0.240411	0.95193	0.796608	2.97e-07	-3.10046	down
AT5G18661.1	31	40	48	2	6	1	8.24683	9.81012	12.3638	0.480821	1.4279	0.265536	2.62e-07	-3.09885	down
ONT.570.1	33	44	53	2	4	4	8.77889	10.7911	13.6517	0.480821	0.95193	1.06214	4.32e-08	-3.09816	down
AT5G43690.1	24	18	20	2	0	2	6.38464	4.41455	5.15158	0.480821	0	0.531072	5.32e-05	-3.09745	down
AT4G18422.1	14	25	24	2	0	2	3.72438	6.13133	6.18189	0.480821	0	0.531072	6.42e-05	-3.09707	down
AT4G26320.1	226	300	219	26	25	15	60.1221	73.5759	56.4098	6.25068	5.94956	3.98304	6e-35	-3.09198	down
AT4G11840.1	14	11	14	2	0	0	3.72438	2.69778	3.6061	0.480821	0	0	0.000726287	-3.09166	down
ONT.4076.1	19	22	20	1	2	1	5.05451	5.39557	5.15158	0.240411	0.475965	0.265536	4.4e-05	-3.09097	down
AT5G40590.1	270	273	411	26	0	13	71.8273	66.9541	105.865	6.25068	0	3.45197	0.00323124	-3.08984	down
AT3G23470.1	27	30	26	3	2	1	7.18273	7.35759	6.69705	0.721232	0.475965	0.265536	3.52e-06	-3.08839	down
ONT.10078.4	21	12	31	0	2	2	5.58656	2.94304	7.98494	0	0.475965	0.531072	0.000116489	-3.08799	down
AT5G43420.1	43	49	46	4	5	2	11.4392	12.0174	11.8486	0.961642	1.18991	0.531072	5.95e-09	-3.08703	down
AT5G59680.1	13	20	17	1	1	1	3.45835	4.90506	4.37884	0.240411	0.237983	0.265536	0.000176539	-3.08685	down
AT4G12290.1	411	484	421	18	58	40	109.337	118.702	108.441	4.32739	13.803	10.6214	3.08e-31	-3.08631	down
AT4G18195.1	42	40	34	3	3	3	11.1731	9.81012	8.75768	0.721232	0.713948	0.796608	7.69e-08	-3.08388	down
AT3G04330.1	20	34	42	3	2	2	5.32054	8.3386	10.8183	0.721232	0.475965	0.531072	2.81e-06	-3.08313	down
AT4G05590.2	6	14	8	1	0	0	1.59616	3.43354	2.06063	0.240411	0	0	0.00266542	-3.08199	down
AT3G50300.1	58	60	63	7	5	3	15.4296	14.7152	16.2275	1.68287	1.18991	0.796608	4.69e-11	-3.0816	down
AT4G20450.1	6	13	9	0	0	1	1.59616	3.18829	2.31821	0	0	0.265536	0.00256085	-3.08035	down
ONT.1201.1	26	31	26	1	2	3	6.9167	7.60284	6.69705	0.240411	0.475965	0.796608	4.01e-06	-3.07603	down
ONT.1186.1	11	8	8	1	0	0	2.9263	1.96202	2.06063	0.240411	0	0	0.00258728	-3.07445	down
AT1G19180.2	31	32	30	3	3	1	8.24683	7.8481	7.72736	0.721232	0.713948	0.265536	1.15e-06	-3.07419	down
ONT.168.1	10	8	9	0	0	1	2.66027	1.96202	2.31821	0	0	0.265536	0.00256872	-3.06772	down
AT1G17090.1	48	57	44	2	8	2	12.7693	13.9794	11.3335	0.480821	1.90386	0.531072	1.13e-08	-3.0674	down
AT5G52710.1	8	9	10	0	0	1	2.12821	2.20728	2.57579	0	0	0.265536	0.0025675	-3.06679	down
AT1G21120.1	321	365	364	35	39	22	85.3946	89.5173	93.7587	8.41437	9.28132	5.84179	3.05e-52	-3.06499	down
AT4G23220.1	67	90	67	9	4	6	17.8238	22.0728	17.2578	2.1637	0.95193	1.59322	1.44e-12	-3.06443	down
ONT.16029.1	14	16	19	2	1	0	3.72438	3.92405	4.894	0.480821	0.237983	0	0.000230163	-3.06376	down
AT4G16600.1	18	13	18	2	1	0	4.78848	3.18829	4.63642	0.480821	0.237983	0	0.000245015	-3.06293	down
AT4G28250.1	315	344	281	34	35	17	83.7985	84.367	72.3796	8.17396	8.32939	4.51411	1.38e-43	-3.06	down
AT1G13830.1	88	100	120	10	9	8	23.4104	24.5253	30.9095	2.40411	2.14184	2.12429	9.3e-17	-3.05888	down
ONT.18410.1	38	35	30	4	3	1	10.109	8.58386	7.72736	0.961642	0.713948	0.265536	5.28e-07	-3.05797	down
AT3G13610.1	309	303	360	30	28	31	82.2023	74.3117	92.7284	7.21232	6.66351	8.23162	1.68e-46	-3.05706	down
ONT.12657.1	14	12	12	0	2	0	3.72438	2.94304	3.09095	0	0.475965	0	0.00085709	-3.05616	down
ONT.17694.1	41	67	35	9	2	0	10.9071	16.432	9.01526	2.1637	0.475965	0	1.6e-06	-3.05504	down
AT1G65620.1	15	24	11	1	2	0	3.9904	5.88607	2.83337	0.240411	0.475965	0	0.000315193	-3.05464	down
ONT.16002.1	14	8	16	1	1	0	3.72438	1.96202	4.12126	0.240411	0.237983	0	0.000943372	-3.05146	down
AT5G19790.1	52	65	72	6	5	5	13.8334	15.9414	18.5457	1.44246	1.18991	1.32768	3.84e-11	-3.05142	down
ONT.5420.5	112	136	101	11	13	7	29.795	33.3544	26.0155	2.64452	3.09377	1.85875	8.1e-19	-3.05097	down
AT3G50610.1	5	5	5	0	0	0	1.33013	1.22627	1.28789	0	0	0	0.00887826	-3.04992	down
ONT.3445.1	22	18	31	1	3	1	5.85259	4.41455	7.98494	0.240411	0.713948	0.265536	3.05e-05	-3.04915	down
AT2G37670.1	16	10	12	2	0	0	4.25643	2.45253	3.09095	0.480821	0	0	0.000976032	-3.04861	down
AT4G20240.1	42	52	64	8	2	3	11.1731	12.7532	16.485	1.92328	0.475965	0.796608	8.45e-09	-3.04861	down
AT3G50640.1	64	83	64	10	7	1	17.0257	20.356	16.485	2.40411	1.66588	0.265536	6.04e-11	-3.0484	down
AT3G09520.1	19	15	15	3	0	0	5.05451	3.6788	3.86368	0.721232	0	0	0.000335902	-3.04357	down
AT3G23175.1	249	272	248	28	24	19	66.2407	66.7088	63.8795	6.7315	5.71158	5.04519	4.19e-42	-3.04303	down
AT1G79250.1	4	5	6	0	0	0	1.06411	1.22627	1.54547	0	0	0	0.00911899	-3.0427	down
AT4G25090.1	5	6	4	0	0	0	1.33013	1.47152	1.03032	0	0	0	0.00913546	-3.04192	down
ONT.5448.2	4	6	5	0	0	0	1.06411	1.47152	1.28789	0	0	0	0.00914426	-3.04158	down
AT5G49630.1	49	98	77	5	8	6	13.0353	24.0348	19.8336	1.20205	1.90386	1.59322	4.76e-11	-3.04072	down
AT1G65730.1	83	106	105	13	5	8	22.0802	25.9968	27.0458	3.12534	1.18991	2.12429	1.48e-15	-3.03849	down
ONT.9094.3	20	16	25	0	4	0	5.32054	3.92405	6.43947	0	0.95193	0	0.000161421	-3.03846	down
AT4G14860.1	4	15	9	0	1	0	1.06411	3.6788	2.31821	0	0.237983	0	0.00353901	-3.037	down
ONT.13392.1	6	7	14	1	0	0	1.59616	1.71677	3.6061	0.240411	0	0	0.00336283	-3.0361	down
ONT.13436.2	8	17	14	0	0	2	2.12821	4.1693	3.6061	0	0	0.531072	0.00105831	-3.03586	down
ONT.4554.6	23	10	7	0	2	0	6.11862	2.45253	1.80305	0	0.475965	0	0.00155618	-3.03333	down
ONT.11553.2	31	56	38	6	2	2	8.24683	13.7342	9.78799	1.44246	0.475965	0.531072	2.28e-07	-3.03306	down
ONT.16645.3	179	200	175	16	20	15	47.6188	49.0506	45.0763	3.84657	4.75965	3.98304	9.12e-31	-3.03264	down
AT4G01400.1	18	5	16	1	1	0	4.78848	1.22627	4.12126	0.240411	0.237983	0	0.00141271	-3.03196	down
ONT.4843.2	19	11	19	0	1	2	5.05451	2.69778	4.894	0	0.237983	0.531072	0.000334243	-3.03189	down
AT5G60950.1	372	412	355	46	35	26	98.962	101.044	91.4405	11.0589	8.32939	6.90394	1.3e-55	-3.0281	down
AT1G34540.1	9	21	9	2	0	0	2.39424	5.15031	2.31821	0.480821	0	0	0.00132299	-3.02726	down
AT3G54770.1	44	49	50	4	3	5	11.7052	12.0174	12.8789	0.961642	0.713948	1.32768	4.38e-09	-3.02343	down
AT5G65040.1	63	103	85	5	11	6	16.7597	25.2611	21.8942	1.20205	2.61781	1.59322	1.02e-12	-3.02286	down
AT2G48130.1	356	357	456	38	37	35	94.7056	87.5553	117.456	9.1356	8.80535	9.29376	2.93e-48	-3.02143	down
ONT.2977.6	9	13	5	0	0	1	2.39424	3.18829	1.28789	0	0	0.265536	0.00345542	-3.02043	down
AT2G30130.1	7	11	8	1	0	0	1.86219	2.69778	2.06063	0.240411	0	0	0.00329028	-3.02011	down
AT5G67620.1	58	60	77	6	6	5	15.4296	14.7152	19.8336	1.44246	1.4279	1.32768	2.87e-11	-3.01935	down
AT5G11950.2	88	103	119	14	8	6	23.4104	25.2611	30.6519	3.36575	1.90386	1.59322	5.45e-16	-3.01885	down
ONT.1969.1	9	6	11	1	0	0	2.39424	1.47152	2.83337	0.240411	0	0	0.00344298	-3.01711	down
AT4G14980.1	17	23	18	1	2	1	4.52246	5.64082	4.63642	0.240411	0.475965	0.265536	8.2e-05	-3.01673	down
AT2G47140.1	96	99	92	8	12	6	25.5386	24.28	23.6973	1.92328	2.85579	1.59322	3.03e-16	-3.01397	down
AT2G29460.1	45	56	54	10	2	1	11.9712	13.7342	13.9093	2.40411	0.475965	0.265536	6.17e-08	-3.0107	down
AT4G12510.1	44	48	39	4	3	4	11.7052	11.7721	10.0456	0.961642	0.713948	1.06214	1.81e-08	-3.00901	down
AT4G25820.1	361	425	497	45	44	33	96.0357	104.233	128.017	10.8185	10.4712	8.76269	1.06e-50	-3.0087	down
AT5G55460.1	24	23	32	1	3	2	6.38464	5.64082	8.24252	0.240411	0.713948	0.531072	1.03e-05	-3.0075	down
AT1G43020.1	26	19	26	0	5	0	6.9167	4.65981	6.69705	0	1.18991	0	9.67e-05	-3.00736	down
ONT.16212.3	32	27	43	1	2	5	8.51286	6.62183	11.0759	0.240411	0.475965	1.32768	2.3e-06	-3.0059	down
AT1G72830.1	68	74	86	8	12	0	18.0898	18.1487	22.1518	1.92328	2.85579	0	8.59e-10	-3.00469	down
AT5G54370.1	129	148	113	16	16	4	34.3175	36.2974	29.1064	3.84657	3.80772	1.06214	3.31e-18	-3.00446	down
ONT.14300.1	17	11	20	0	1	2	4.52246	2.69778	5.15158	0	0.237983	0.531072	0.000393566	-3.00441	down
ONT.14219.3	12	11	13	1	1	0	3.19232	2.69778	3.34852	0.240411	0.237983	0	0.00104072	-3.00375	down
AT5G55720.1	11	10	5	1	0	0	2.9263	2.45253	1.28789	0.240411	0	0	0.00379155	-3.00042	down
AT3G24300.1	117	130	151	17	16	4	31.1251	31.8829	38.8944	4.08698	3.80772	1.06214	7.34e-18	-2.99688	down
AT1G79180.1	71	79	83	6	7	8	18.8879	19.375	21.379	1.44246	1.66588	2.12429	1.68e-13	-2.99618	down
AT5G66690.1	202	215	257	23	22	19	53.7374	52.7294	66.1978	5.52944	5.23562	5.04519	3.79e-33	-2.99562	down
ONT.8157.1	6	13	7	1	0	0	1.59616	3.18829	1.80305	0.240411	0	0	0.00389794	-2.99326	down
ONT.5516.3	63	91	79	7	10	4	16.7597	22.318	20.3487	1.68287	2.37983	1.06214	1.35e-12	-2.99115	down
ONT.9908.1	67	64	70	10	4	4	17.8238	15.6962	18.0305	2.40411	0.95193	1.06214	2.58e-11	-2.99022	down
ONT.13199.3	12	9	44	3	0	1	3.19232	2.20728	11.3335	0.721232	0	0.265536	0.000768956	-2.98949	down
ONT.12484.1	9	15	12	1	1	0	2.39424	3.6788	3.09095	0.240411	0.237983	0	0.00117588	-2.9891	down
AT5G24760.2	7	23	19	1	2	0	1.86219	5.64082	4.894	0.240411	0.475965	0	0.000652065	-2.98724	down
AT4G21745.1	10	11	5	0	0	1	2.66027	2.69778	1.28789	0	0	0.265536	0.00391436	-2.98652	down
AT5G25770.3	9	13	14	1	0	1	2.39424	3.18829	3.6061	0.240411	0	0.265536	0.00117847	-2.9845	down
ONT.5051.2	30	26	17	0	0	5	7.98081	6.37658	4.37884	0	0	1.32768	0.000146122	-2.98115	down
AT1G35910.1	13	17	17	0	3	0	3.45835	4.1693	4.37884	0	0.713948	0	0.000486389	-2.98004	down
AT5G25880.1	9	7	9	0	1	0	2.39424	1.71677	2.31821	0	0.237983	0	0.00389063	-2.97945	down
AT3G51350.1	51	48	49	5	5	3	13.5674	11.7721	12.6214	1.20205	1.18991	0.796608	2.85e-09	-2.97939	down
AT1G33800.1	270	373	330	40	31	23	71.8273	91.4794	85.001	9.61642	7.37746	6.10733	4.59e-42	-2.97906	down
AT3G53510.1	14	23	12	0	0	3	3.72438	5.64082	3.09095	0	0	0.796608	0.0005681	-2.9789	down
AT1G80730.1	7	9	9	0	1	0	1.86219	2.20728	2.31821	0	0.237983	0	0.00389304	-2.97759	down
AT3G44540.1	18	45	38	3	2	3	4.78848	11.0364	9.78799	0.721232	0.475965	0.796608	4.91e-06	-2.97675	down
AT4G05440.1	34	35	28	3	2	3	9.04491	8.58386	7.21221	0.721232	0.475965	0.796608	1.09e-06	-2.97078	down
ONT.2487.4	21	20	15	2	1	1	5.58656	4.90506	3.86368	0.480821	0.237983	0.265536	0.000122489	-2.97051	down
ONT.12320.1	76	74	78	8	10	3	20.218	18.1487	20.0911	1.92328	2.37983	0.796608	1.21e-12	-2.97042	down
AT5G11210.1	6	10	9	1	0	0	1.59616	2.45253	2.31821	0.240411	0	0	0.00413067	-2.96917	down
ONT.15842.1	14	20	48	3	3	0	3.72438	4.90506	12.3638	0.721232	0.713948	0	0.000127934	-2.96714	down
ONT.18226.1	6	8	11	1	0	0	1.59616	1.96202	2.83337	0.240411	0	0	0.00426396	-2.96586	down
AT1G09932.1	185	217	259	27	20	17	49.215	53.2199	66.7129	6.49109	4.75965	4.51411	1.24e-29	-2.96501	down
AT5G02350.1	8	11	6	1	0	0	2.12821	2.69778	1.54547	0.240411	0	0	0.00426716	-2.96408	down
AT3G28070.1	53	48	64	0	5	9	14.0994	11.7721	16.485	0	1.18991	2.38983	1.21e-07	-2.96302	down
AT1G65250.1	23	24	19	1	2	2	6.11862	5.88607	4.894	0.240411	0.475965	0.531072	3.79e-05	-2.96297	down
AT5G65300.1	121	163	175	15	18	11	32.1892	39.9762	45.0763	3.60616	4.28369	2.9209	5.59e-22	-2.96033	down
AT1G53130.1	4	10	12	0	0	1	1.06411	2.45253	3.09095	0	0	0.265536	0.00462035	-2.95988	down
AT1G70460.1	34	43	50	4	3	4	9.04491	10.5459	12.8789	0.961642	0.713948	1.06214	6.38e-08	-2.95864	down
AT5G24313.1	54	64	69	5	9	3	14.3655	15.6962	17.7729	1.20205	2.14184	0.796608	1.65e-10	-2.95833	down
AT3G20110.1	23	22	21	4	1	0	6.11862	5.39557	5.40915	0.961642	0.237983	0	6.31e-05	-2.95686	down
AT1G72220.1	22	17	27	1	2	2	5.85259	4.1693	6.95463	0.240411	0.475965	0.531072	5.15e-05	-2.95573	down
AT4G37160.1	19	18	18	2	1	1	5.05451	4.41455	4.63642	0.480821	0.237983	0.265536	0.000126847	-2.95336	down
ONT.13446.3	9	16	21	1	1	1	2.39424	3.92405	5.40915	0.240411	0.237983	0.265536	0.000552417	-2.94965	down
AT4G22710.1	34	36	36	6	3	0	9.04491	8.82911	9.27284	1.44246	0.713948	0	1.34e-06	-2.94931	down
AT2G46440.1	54	49	52	7	4	3	14.3655	12.0174	13.3941	1.68287	0.95193	0.796608	2.35e-09	-2.9492	down
AT4G23590.1	10	29	10	1	0	2	2.66027	7.11234	2.57579	0.240411	0	0.531072	0.00088146	-2.94689	down
AT1G60470.1	9	19	18	1	2	0	2.39424	4.65981	4.63642	0.240411	0.475965	0	0.000607897	-2.94651	down
ONT.6549.2	41	51	53	6	4	3	10.9071	12.5079	13.6517	1.44246	0.95193	0.796608	7.4e-09	-2.94462	down
ONT.13437.2	76	91	88	5	11	8	20.218	22.318	22.6669	1.20205	2.61781	2.12429	5.52e-14	-2.94381	down
ONT.4554.1	41	60	45	4	7	2	10.9071	14.7152	11.591	0.961642	1.66588	0.531072	1.74e-08	-2.94351	down
AT2G28760.2	56	61	60	3	4	9	14.8975	14.9604	15.4547	0.721232	0.95193	2.38983	6.5e-10	-2.94272	down
ONT.13245.2	21	18	27	0	3	2	5.58656	4.41455	6.95463	0	0.713948	0.531072	7.04e-05	-2.94194	down
AT2G41970.1	31	61	46	6	2	4	8.24683	14.9604	11.8486	1.44246	0.475965	1.06214	1.29e-07	-2.94147	down
ONT.7090.1	7	12	6	0	0	1	1.86219	2.94304	1.54547	0	0	0.265536	0.00469123	-2.94043	down
AT2G19590.1	219	246	241	29	23	18	58.2599	60.3322	62.0765	6.97191	5.4736	4.77965	3.86e-37	-2.94005	down
AT5G07450.1	9	26	22	2	1	1	2.39424	6.37658	5.66673	0.480821	0.237983	0.265536	0.000283876	-2.93795	down
AT4G13390.1	194	247	299	23	26	24	51.6092	60.5775	77.0161	5.52944	6.18755	6.37287	6.34e-30	-2.93495	down
AT2G37430.1	61	62	81	5	10	4	16.2276	15.2057	20.8639	1.20205	2.37983	1.06214	7.93e-11	-2.93379	down
AT4G03330.1	14	19	12	2	0	1	3.72438	4.65981	3.09095	0.480821	0	0.265536	0.000543453	-2.93355	down
AT5G46260.1	8	7	9	0	1	0	2.12821	1.71677	2.31821	0	0.237983	0	0.00480638	-2.92906	down
AT3G03190.1	33	40	31	5	2	2	8.77889	9.81012	7.98494	1.20205	0.475965	0.531072	7.93e-07	-2.92703	down
AT3G48340.1	412	475	449	48	41	46	109.603	116.495	115.653	11.5397	9.75728	12.2147	1.35e-66	-2.92469	down
AT1G15640.1	14	23	29	4	1	0	3.72438	5.64082	7.46979	0.961642	0.237983	0	0.000143711	-2.9219	down
AT3G13782.1	12	14	9	0	0	2	3.19232	3.43354	2.31821	0	0	0.531072	0.00178126	-2.91828	down
ONT.10402.2	28	19	27	1	3	2	7.44875	4.65981	6.95463	0.240411	0.713948	0.531072	2.65e-05	-2.9162	down
ONT.12159.1	19	28	27	3	1	2	5.05451	6.86708	6.95463	0.721232	0.237983	0.531072	2.3e-05	-2.91533	down
AT1G48510.1	9	13	12	1	0	1	2.39424	3.18829	3.09095	0.240411	0	0.265536	0.00167345	-2.91335	down
AT5G63660.1	216	255	215	18	26	25	57.4618	62.5395	55.3794	4.32739	6.18755	6.6384	1.38e-34	-2.91124	down
ONT.10112.1	7	10	7	0	0	1	1.86219	2.45253	1.80305	0	0	0.265536	0.00510858	-2.9107	down
AT1G71015.1	61	54	48	4	3	8	16.2276	13.2437	12.3638	0.961642	0.713948	2.12429	3.78e-09	-2.91055	down
AT1G21890.1	6	11	7	1	0	0	1.59616	2.69778	1.80305	0.240411	0	0	0.00534498	-2.91024	down
ONT.620.2	6	9	9	0	0	1	1.59616	2.20728	2.31821	0	0	0.265536	0.00514674	-2.90996	down
AT3G55700.1	9	11	14	0	1	1	2.39424	2.69778	3.6061	0	0.237983	0.265536	0.00174068	-2.90982	down
AT1G57630.1	25	28	41	4	1	3	6.65067	6.86708	10.5607	0.961642	0.237983	0.796608	5.3e-06	-2.90766	down
AT4G27654.1	29	38	47	2	3	5	7.71478	9.31961	12.1062	0.480821	0.713948	1.32768	6.25e-07	-2.90746	down
ONT.1450.2	87	83	77	7	9	8	23.1443	20.356	19.8336	1.68287	2.14184	2.12429	6.06e-14	-2.90471	down
AT5G15890.1	17	22	15	3	0	1	4.52246	5.39557	3.86368	0.721232	0	0.265536	0.00025011	-2.90247	down
AT2G47550.1	27	37	29	4	1	3	7.18273	9.07436	7.46979	0.961642	0.237983	0.796608	3.24e-06	-2.90212	down
AT3G62650.2	48	43	61	2	7	5	12.7693	10.5459	15.7123	0.480821	1.66588	1.32768	2.03e-08	-2.90118	down
AT5G40230.1	6	20	10	2	0	0	1.59616	4.90506	2.57579	0.480821	0	0	0.00269479	-2.90094	down
AT1G26730.1	13	8	13	2	0	0	3.45835	1.96202	3.34852	0.480821	0	0	0.00214977	-2.90021	down
AT3G22570.1	134	165	209	20	16	15	35.6476	40.4667	53.834	4.80821	3.80772	3.98304	4.8e-22	-2.89847	down
AT1G60970.1	34	44	46	2	2	7	9.04491	10.7911	11.8486	0.480821	0.475965	1.85875	3.54e-07	-2.89764	down
AT5G38010.1	18	27	28	2	2	2	4.78848	6.62183	7.21221	0.480821	0.475965	0.531072	2.61e-05	-2.89728	down
AT2G43120.1	33	42	46	5	4	2	8.77889	10.3006	11.8486	1.20205	0.95193	0.531072	1.6e-07	-2.89654	down
AT1G04220.1	88	90	68	10	6	8	23.4104	22.0728	17.5154	2.40411	1.4279	2.12429	3.51e-13	-2.89292	down
AT5G36180.1	40	50	50	7	3	3	10.6411	12.2627	12.8789	1.68287	0.713948	0.796608	2.27e-08	-2.89242	down
ONT.12199.1	12	16	15	1	1	1	3.19232	3.92405	3.86368	0.240411	0.237983	0.265536	0.000594303	-2.89174	down
ONT.9566.1	16	21	26	2	1	2	4.25643	5.15031	6.69705	0.480821	0.237983	0.531072	8.23e-05	-2.89035	down
AT1G12805.1	22	29	42	3	2	3	5.85259	7.11234	10.8183	0.721232	0.475965	0.796608	6.4e-06	-2.89027	down
ONT.13526.2	16	16	32	3	1	1	4.25643	3.92405	8.24252	0.721232	0.237983	0.265536	0.00015375	-2.8888	down
ONT.14160.1	29	28	45	2	4	3	7.71478	6.86708	11.591	0.480821	0.95193	0.796608	2.36e-06	-2.88645	down
AT1G13510.1	14	23	26	2	2	1	3.72438	5.64082	6.69705	0.480821	0.475965	0.265536	9.8e-05	-2.88644	down
AT3G50760.1	93	101	97	14	8	7	24.7405	24.7706	24.9851	3.36575	1.90386	1.85875	8.48e-16	-2.88635	down
AT5G10830.1	21	33	28	3	3	1	5.58656	8.09335	7.21221	0.721232	0.713948	0.265536	1.15e-05	-2.88609	down
AT5G67310.1	17	7	11	0	0	2	4.52246	1.71677	2.83337	0	0	0.531072	0.00252698	-2.88593	down
AT5G49270.1	40	40	50	3	4	5	10.6411	9.81012	12.8789	0.721232	0.95193	1.32768	5.64e-08	-2.88534	down
ONT.2436.2	4	10	10	0	1	0	1.06411	2.45253	2.57579	0	0.237983	0	0.00622335	-2.88392	down
AT1G62870.1	11	13	9	1	1	0	2.9263	3.18829	2.31821	0.240411	0.237983	0	0.00198078	-2.8834	down
AT1G62560.1	92	107	132	19	8	6	24.4745	26.2421	34.0004	4.5678	1.90386	1.59322	4.88e-14	-2.88142	down
ONT.9564.1	10	17	16	2	1	0	2.66027	4.1693	4.12126	0.480821	0.237983	0	0.000809065	-2.87592	down
ONT.4079.2	695	806	827	99	68	78	184.889	197.674	213.018	23.8007	16.1828	20.7118	1.57e-86	-2.87282	down
ONT.14068.1	68	55	42	7	0	0	18.0898	13.4889	10.8183	1.68287	0	0	0.00982915	-2.87184	down
AT1G05990.1	6	10	18	1	1	0	1.59616	2.45253	4.63642	0.240411	0.237983	0	0.00270363	-2.8713	down
ONT.9403.1	10	6	7	1	0	0	2.66027	1.47152	1.80305	0.240411	0	0	0.00631027	-2.86899	down
AT4G36120.1	28	50	33	6	2	2	7.44875	12.2627	8.5001	1.44246	0.475965	0.531072	1.72e-06	-2.8673	down
AT1G59730.1	6	9	20	2	0	0	1.59616	2.20728	5.15158	0.480821	0	0	0.00336514	-2.8664	down
AT1G58170.1	18	20	24	4	1	0	4.78848	4.90506	6.18189	0.961642	0.237983	0	0.000142914	-2.86538	down
AT1G70270.1	15	17	11	0	1	2	3.9904	4.1693	2.83337	0	0.237983	0.531072	0.000799131	-2.86484	down
ONT.6863.1	13	20	19	2	1	1	3.45835	4.90506	4.894	0.480821	0.237983	0.265536	0.000268441	-2.86475	down
AT3G23250.1	119	109	179	18	0	5	31.6572	26.7326	46.1066	4.32739	0	1.32768	0.00516727	-2.86442	down
AT5G42580.1	10	23	21	0	2	2	2.66027	5.64082	5.40915	0	0.475965	0.531072	0.000421291	-2.86348	down
AT5G45920.1	19	45	22	6	1	0	5.05451	11.0364	5.66673	1.44246	0.237983	0	0.00012613	-2.86258	down
AT5G22560.1	9	6	8	0	0	1	2.39424	1.47152	2.06063	0	0	0.265536	0.0062801	-2.86163	down
AT2G16230.1	5	10	8	1	0	0	1.33013	2.45253	2.06063	0.240411	0	0	0.00668634	-2.85579	down
AT3G23190.1	105	134	141	10	20	9	27.9328	32.8639	36.3186	2.40411	4.75965	2.38983	1.77e-17	-2.85354	down
AT2G36650.1	30	28	31	5	2	1	7.98081	6.86708	7.98494	1.20205	0.475965	0.265536	6.23e-06	-2.85289	down
AT4G26770.1	5	14	5	0	1	0	1.33013	3.43354	1.28789	0	0.237983	0	0.00747261	-2.85041	down
ONT.2215.1	13	28	32	1	2	3	3.45835	6.86708	8.24252	0.240411	0.475965	0.796608	8.66e-05	-2.84987	down
AT2G25980.1	64	60	49	9	5	3	17.0257	14.7152	12.6214	2.1637	1.18991	0.796608	1.71e-09	-2.84943	down
AT5G07130.1	14	12	7	2	0	0	3.72438	2.94304	1.80305	0.480821	0	0	0.0028512	-2.84852	down
AT5G20550.1	62	83	65	9	8	4	16.4937	20.356	16.7426	2.1637	1.90386	1.06214	2.04e-11	-2.84728	down
AT5G13930.1	48	54	52	7	3	5	12.7693	13.2437	13.3941	1.68287	0.713948	1.32768	4.16e-09	-2.84644	down
AT3G56620.1	40	34	20	7	0	1	10.6411	8.3386	5.15158	1.68287	0	0.265536	7.59e-05	-2.84626	down
AT1G55610.1	7	11	5	0	1	0	1.86219	2.69778	1.28789	0	0.237983	0	0.00704948	-2.84538	down
AT2G37600.2	20	11	12	3	0	0	5.32054	2.69778	3.09095	0.721232	0	0	0.00137404	-2.84479	down
AT1G49860.1	81	76	79	7	10	7	21.5482	18.6392	20.3487	1.68287	2.37983	1.85875	3.89e-13	-2.84136	down
AT5G38020.1	68	62	90	10	4	8	18.0898	15.2057	23.1821	2.40411	0.95193	2.12429	8.06e-11	-2.84126	down
ONT.3757.2	12	6	5	1	0	0	3.19232	1.47152	1.28789	0.240411	0	0	0.00752576	-2.84031	down
AT3G25130.1	18	29	23	3	2	1	4.78848	7.11234	5.92431	0.721232	0.475965	0.265536	4.63e-05	-2.84029	down
AT1G68470.1	25	34	21	1	4	2	6.65067	8.3386	5.40915	0.240411	0.95193	0.531072	2.14e-05	-2.8389	down
AT5G38900.1	291	317	325	43	36	21	77.4138	77.7452	83.7131	10.3377	8.56737	5.57626	4.59e-42	-2.83862	down
AT1G33750.1	27	44	48	7	4	0	7.18273	10.7911	12.3638	1.68287	0.95193	0	3.69e-06	-2.83851	down
AT4G37680.1	20	30	31	0	5	2	5.32054	7.35759	7.98494	0	1.18991	0.531072	3.96e-05	-2.83493	down
AT5G08640.1	18	26	26	4	2	0	4.78848	6.37658	6.69705	0.961642	0.475965	0	6.93e-05	-2.83441	down
AT3G29630.1	4	12	18	1	1	0	1.06411	2.94304	4.63642	0.240411	0.237983	0	0.0036881	-2.83421	down
AT1G60390.1	44	38	34	5	2	4	11.7052	9.31961	8.75768	1.20205	0.475965	1.06214	3.63e-07	-2.83421	down
AT4G08620.1	14	12	15	1	1	1	3.72438	2.94304	3.86368	0.240411	0.237983	0.265536	0.000856453	-2.83225	down
ONT.13663.1	29	24	35	2	3	3	7.71478	5.88607	9.01526	0.480821	0.713948	0.796608	7.11e-06	-2.83081	down
ONT.15327.1	12	15	14	1	1	1	3.19232	3.6788	3.6061	0.240411	0.237983	0.265536	0.000844773	-2.83048	down
ONT.1396.2	9	9	14	1	0	1	2.39424	2.20728	3.6061	0.240411	0	0.265536	0.00266567	-2.82969	down
ONT.2120.1	19	19	32	3	1	2	5.05451	4.65981	8.24252	0.721232	0.237983	0.531072	7.01e-05	-2.82896	down
ONT.16025.2	7	18	18	0	2	1	1.86219	4.41455	4.63642	0	0.475965	0.265536	0.00138077	-2.82607	down
AT4G40090.1	278	342	429	43	43	27	73.9555	83.8765	110.501	10.3377	10.2332	7.16948	1.02e-33	-2.82467	down
AT3G46270.1	19	15	8	1	2	0	5.05451	3.6788	2.06063	0.240411	0.475965	0	0.0013288	-2.82376	down
AT3G54420.1	30	33	44	7	2	1	7.98081	8.09335	11.3335	1.68287	0.475965	0.265536	3.91e-06	-2.82372	down
ONT.4554.5	4	7	12	0	1	0	1.06411	1.71677	3.09095	0	0.237983	0	0.00810137	-2.82371	down
ONT.14036.1	19	21	29	2	3	1	5.05451	5.15031	7.46979	0.480821	0.713948	0.265536	5.74e-05	-2.82317	down
AT4G33790.1	13	13	15	0	2	1	3.45835	3.18829	3.86368	0	0.475965	0.265536	0.000998414	-2.81939	down
AT1G14240.4	20	27	32	5	2	0	5.32054	6.62183	8.24252	1.20205	0.475965	0	4.59e-05	-2.81904	down
AT4G22235.1	45	47	59	6	7	2	11.9712	11.5269	15.1971	1.44246	1.66588	0.531072	1.89e-08	-2.81858	down
ONT.5095.2	22	18	29	3	1	2	5.85259	4.41455	7.46979	0.721232	0.237983	0.531072	6.44e-05	-2.81848	down
AT4G32940.1	4818	5312	5143	632	570	483	1281.72	1302.78	1324.73	151.94	135.65	128.254	0	-2.81793	down
AT5G55170.1	68	78	78	5	10	8	18.0898	19.1297	20.0911	1.20205	2.37983	2.12429	3.37e-12	-2.81659	down
AT1G67150.1	8	16	18	0	2	1	2.12821	3.92405	4.63642	0	0.475965	0.265536	0.00132263	-2.81356	down
ONT.10619.1	13	13	15	1	0	2	3.45835	3.18829	3.86368	0.240411	0	0.531072	0.001022	-2.81343	down
AT5G52810.1	278	325	352	34	46	24	73.9555	79.7072	90.6677	8.17396	10.9472	6.37287	2.07e-38	-2.812	down
AT2G35270.1	14	18	19	0	1	3	3.72438	4.41455	4.894	0	0.237983	0.796608	0.000446867	-2.81031	down
ONT.10949.2	8	6	8	0	0	1	2.12821	1.47152	2.06063	0	0	0.265536	0.00770014	-2.80903	down
ONT.16125.3	46	39	56	7	4	3	12.2372	9.56487	14.4244	1.68287	0.95193	0.796608	5.79e-08	-2.80877	down
AT4G27850.1	5	8	9	1	0	0	1.33013	1.96202	2.31821	0.240411	0	0	0.00802888	-2.80774	down
ONT.18718.1	8	8	6	0	0	1	2.12821	1.96202	1.54547	0	0	0.265536	0.00771249	-2.80733	down
AT1G17590.1	40	35	49	2	8	2	10.6411	8.58386	12.6214	0.480821	1.90386	0.531072	8.91e-07	-2.80541	down
AT3G52370.1	130	126	118	12	15	13	34.5835	30.9019	30.3943	2.88493	3.56974	3.45197	6.34e-20	-2.80523	down
AT2G43000.1	62	67	74	8	8	5	16.4937	16.432	19.0608	1.92328	1.90386	1.32768	2.46e-11	-2.80465	down
AT5G44900.1	32	22	23	3	3	1	8.51286	5.39557	5.92431	0.721232	0.713948	0.265536	2.84e-05	-2.80437	down
ONT.722.1	25	25	19	0	4	2	6.65067	6.13133	4.894	0	0.95193	0.531072	8.35e-05	-2.80335	down
AT4G15530.3	10	7	5	0	1	0	2.66027	1.71677	1.28789	0	0.237983	0	0.00830252	-2.80226	down
AT3G48450.1	32	24	30	5	2	1	8.51286	5.88607	7.72736	1.20205	0.475965	0.265536	1.36e-05	-2.80139	down
AT4G39670.1	166	164	204	27	15	16	44.1605	40.2215	52.5461	6.49109	3.56974	4.24858	1.39e-23	-2.79823	down
ONT.8347.2	8	5	9	0	0	1	2.12821	1.22627	2.31821	0	0	0.265536	0.00823518	-2.79797	down
ONT.14251.2	8	16	17	2	1	0	2.12821	3.92405	4.37884	0.480821	0.237983	0	0.00143743	-2.79689	down
AT3G46720.1	36	33	34	4	3	3	9.57697	8.09335	8.75768	0.961642	0.713948	0.796608	1.02e-06	-2.7937	down
AT5G66280.1	72	76	80	11	8	5	19.1539	18.6392	20.6063	2.64452	1.90386	1.32768	2.22e-12	-2.7936	down
AT2G28250.2	57	76	78	8	9	5	15.1635	18.6392	20.0911	1.92328	2.14184	1.32768	3.06e-11	-2.7919	down
AT1G55390.1	8	10	13	1	0	1	2.12821	2.45253	3.34852	0.240411	0	0.265536	0.00318601	-2.78971	down
ONT.3946.2	5	7	10	0	0	1	1.33013	1.71677	2.57579	0	0	0.265536	0.00853994	-2.78958	down
AT4G18430.1	95	105	118	19	11	4	25.2726	25.7516	30.3943	4.5678	2.61781	1.06214	1.53e-13	-2.7894	down
AT5G40860.1	10	11	10	0	2	0	2.66027	2.69778	2.57579	0	0.475965	0	0.00335354	-2.78868	down
AT1G65484.1	39	50	41	6	3	4	10.375	12.2627	10.5607	1.44246	0.713948	1.06214	7.91e-08	-2.78726	down
AT2G44578.1	8	13	10	0	1	1	2.12821	3.18829	2.57579	0	0.237983	0.265536	0.00318995	-2.78597	down
ONT.6743.1	14	14	12	0	2	1	3.72438	3.43354	3.09095	0	0.475965	0.265536	0.00120616	-2.78579	down
AT2G30340.1	16	21	21	2	1	2	4.25643	5.15031	5.40915	0.480821	0.237983	0.531072	0.000159788	-2.78496	down
ONT.12714.1	59	76	75	10	5	7	15.6956	18.6392	19.3184	2.40411	1.18991	1.85875	3.22e-11	-2.78303	down
AT5G53250.1	348	407	399	43	50	36	92.5773	99.818	102.774	10.3377	11.8991	9.5593	4.21e-54	-2.78026	down
AT4G02830.2	39	37	35	4	3	4	10.375	9.07436	9.01526	0.961642	0.713948	1.06214	4.64e-07	-2.77849	down
AT5G07780.1	10	8	13	0	2	0	2.66027	1.96202	3.34852	0	0.475965	0	0.00377504	-2.77811	down
AT3G15340.2	13	12	15	0	1	2	3.45835	2.94304	3.86368	0	0.237983	0.531072	0.00127262	-2.77776	down
ONT.952.2	27	37	38	5	3	2	7.18273	9.07436	9.78799	1.20205	0.713948	0.531072	2.16e-06	-2.77161	down
AT5G42785.1	56	45	64	3	7	7	14.8975	11.0364	16.485	0.721232	1.66588	1.85875	1.15e-08	-2.76935	down
AT1G58420.1	14	13	13	0	3	0	3.72438	3.18829	3.34852	0	0.713948	0	0.00165583	-2.7683	down
AT4G26200.1	132	160	144	17	13	18	35.1155	39.2405	37.0913	4.08698	3.09377	4.77965	2.34e-22	-2.7682	down
AT2G37820.1	10	16	14	0	1	2	2.66027	3.92405	3.6061	0	0.237983	0.531072	0.00141648	-2.76574	down
ONT.18303.2	18	20	19	3	2	0	4.78848	4.90506	4.894	0.721232	0.475965	0	0.000223282	-2.76548	down
AT4G20210.1	8	16	7	1	1	0	2.12821	3.92405	1.80305	0.240411	0.237983	0	0.00403616	-2.76509	down
ONT.11288.9	6	8	7	0	1	0	1.59616	1.96202	1.80305	0	0.237983	0	0.00935207	-2.7605	down
AT3G04320.1	46	47	35	3	5	5	12.2372	11.5269	9.01526	0.721232	1.18991	1.32768	1.44e-07	-2.76044	down
AT3G21340.1	8	10	12	1	1	0	2.12821	2.45253	3.09095	0.240411	0.237983	0	0.00366676	-2.75959	down
AT5G48657.2	326	301	342	49	37	24	86.7248	73.8212	88.092	11.7801	8.80535	6.37287	2.13e-38	-2.75872	down
AT5G19110.1	42	41	63	5	4	6	11.1731	10.0554	16.2275	1.20205	0.95193	1.59322	7.07e-08	-2.7573	down
ONT.16615.3	60	83	63	11	6	5	15.9616	20.356	16.2275	2.64452	1.4279	1.32768	1.18e-10	-2.75421	down
AT2G17740.1	388	455	472	64	48	38	103.218	111.59	121.577	15.3863	11.4232	10.0904	3.62e-52	-2.75391	down
ONT.619.5	10	15	14	1	2	0	2.66027	3.6788	3.6061	0.240411	0.475965	0	0.00155127	-2.75219	down
AT1G78860.1	11	12	7	1	1	0	2.9263	2.94304	1.80305	0.240411	0.237983	0	0.00389794	-2.75211	down
AT3G21240.1	446	482	496	66	53	44	118.648	118.212	127.759	15.8671	12.6131	11.6836	8.86e-64	-2.75193	down
AT5G51310.1	6	11	14	0	2	0	1.59616	2.69778	3.6061	0	0.475965	0	0.00464622	-2.75111	down
ONT.1749.1	11	11	8	0	1	1	2.9263	2.69778	2.06063	0	0.237983	0.265536	0.00372399	-2.75066	down
AT3G21230.1	119	131	145	13	20	11	31.6572	32.1281	37.3489	3.12534	4.75965	2.9209	2.71e-19	-2.75061	down
ONT.17971.1	11	23	7	2	1	0	2.9263	5.64082	1.80305	0.480821	0.237983	0	0.00238471	-2.75045	down
ONT.2026.3	6	8	7	0	0	1	1.59616	1.96202	1.80305	0	0	0.265536	0.00958433	-2.74986	down
ONT.12387.1	10	19	11	1	0	2	2.66027	4.65981	2.83337	0.240411	0	0.531072	0.00171462	-2.74936	down
AT4G14640.1	31	34	37	1	3	6	8.24683	8.3386	9.53042	0.240411	0.713948	1.59322	3.97e-06	-2.74842	down
AT2G17070.1	34	32	18	5	2	1	9.04491	7.8481	4.63642	1.20205	0.475965	0.265536	4.03e-05	-2.74616	down
AT3G22930.1	139	195	159	22	12	21	36.9777	47.8243	40.955	5.28903	2.85579	5.57626	1.23e-21	-2.74565	down
AT5G65090.1	14	13	12	0	1	2	3.72438	3.18829	3.09095	0	0.237983	0.531072	0.00150369	-2.74506	down
AT3G07900.1	27	29	35	3	3	3	7.18273	7.11234	9.01526	0.721232	0.713948	0.796608	5.39e-06	-2.74323	down
AT4G27560.1	54	69	72	10	7	4	14.3655	16.9225	18.5457	2.40411	1.66588	1.06214	3.03e-10	-2.74247	down
ONT.16402.2	22	5	17	0	0	3	5.85259	1.22627	4.37884	0	0	0.796608	0.00384381	-2.74206	down
AT1G33260.1	44	52	43	0	7	7	11.7052	12.7532	11.0759	0	1.66588	1.85875	8.27e-07	-2.74096	down
ONT.17122.1	34	28	47	6	3	2	9.04491	6.86708	12.1062	1.44246	0.713948	0.531072	3.23e-06	-2.74043	down
ONT.5481.1	8	12	10	2	0	0	2.12821	2.94304	2.57579	0.480821	0	0	0.0043599	-2.74037	down
AT3G12410.1	6	11	13	1	1	0	1.59616	2.69778	3.34852	0.240411	0.237983	0	0.0043886	-2.73866	down
AT5G10130.1	92	127	99	20	12	3	24.4745	31.1471	25.5003	4.80821	2.85579	0.796608	8.66e-12	-2.7378	down
ONT.19267.2	16	22	27	2	3	1	4.25643	5.39557	6.95463	0.480821	0.713948	0.265536	0.00012068	-2.73703	down
AT4G11170.1	39	47	48	8	5	1	10.375	11.5269	12.3638	1.92328	1.18991	0.265536	2.52e-07	-2.73427	down
AT2G46150.1	64	86	108	10	6	12	17.0257	21.0918	27.8185	2.40411	1.4279	3.18643	2.4e-11	-2.7341	down
ONT.2036.1	9	16	6	0	2	0	2.39424	3.92405	1.54547	0	0.475965	0	0.00525754	-2.73279	down
AT2G47460.1	11	19	18	2	0	2	2.9263	4.65981	4.63642	0.480821	0	0.531072	0.000768562	-2.73241	down
AT1G52800.1	15	30	30	3	1	3	3.9904	7.35759	7.72736	0.721232	0.237983	0.796608	7.82e-05	-2.73198	down
AT2G32140.1	9	6	15	1	1	0	2.39424	1.47152	3.86368	0.240411	0.237983	0	0.00485593	-2.7319	down
AT4G12520.1	88	77	79	12	11	4	23.4104	18.8845	20.3487	2.88493	2.61781	1.06214	3.79e-12	-2.73171	down
AT4G28650.1	17	25	24	1	5	0	4.52246	6.13133	6.18189	0.240411	1.18991	0	0.000227596	-2.73129	down
ONT.4075.4	18	16	6	2	0	1	4.78848	3.92405	1.54547	0.480821	0	0.265536	0.00252653	-2.72773	down
AT2G42060.1	100	105	132	15	15	8	26.6027	25.7516	34.0004	3.60616	3.56974	2.12429	7.28e-16	-2.72549	down
AT2G42330.1	19	13	7	1	1	1	5.05451	3.18829	1.80305	0.240411	0.237983	0.265536	0.00213874	-2.7247	down
AT1G77520.1	38	52	70	8	5	4	10.109	12.7532	18.0305	1.92328	1.18991	1.06214	5.69e-08	-2.72329	down
AT2G39110.1	42	49	58	8	4	4	11.1731	12.0174	14.9396	1.92328	0.95193	1.06214	3.34e-08	-2.71435	down
AT1G71696.2	8	20	13	0	0	3	2.12821	4.90506	3.34852	0	0	0.796608	0.00280841	-2.71422	down
AT1G76350.1	47	71	57	7	6	6	12.5033	17.413	14.682	1.68287	1.4279	1.59322	1.87e-09	-2.71353	down
AT3G09940.1	162	175	157	29	16	12	43.0964	42.9193	40.4399	6.97191	3.80772	3.18643	3.37e-22	-2.71315	down
ONT.5861.1	27	38	59	4	0	8	7.18273	9.31961	15.1971	0.961642	0	2.12429	3.44e-05	-2.71164	down
AT2G29370.1	41	55	44	7	5	3	10.9071	13.4889	11.3335	1.68287	1.18991	0.796608	5.33e-08	-2.71108	down
ONT.11386.1	28	26	35	3	5	1	7.44875	6.37658	9.01526	0.721232	1.18991	0.265536	1.36e-05	-2.70908	down
AT2G39220.1	127	125	140	16	12	17	33.7854	30.6566	36.061	3.84657	2.85579	4.51411	1.46e-19	-2.70708	down
AT1G52050.1	82	101	82	13	8	9	21.8142	24.7706	21.1215	3.12534	1.90386	2.38983	1.05e-13	-2.70156	down
AT3G50400.1	12	15	19	2	1	1	3.19232	3.6788	4.894	0.480821	0.237983	0.265536	0.000801198	-2.70115	down
AT5G10410.1	37	50	53	6	3	6	9.84299	12.2627	13.6517	1.44246	0.713948	1.59322	8.95e-08	-2.70053	down
ONT.4081.2	204	203	225	21	35	18	54.2695	49.7864	57.9552	5.04862	8.32939	4.77965	2.38e-27	-2.70028	down
AT3G14070.1	13	10	6	1	1	0	3.45835	2.45253	1.54547	0.240411	0.237983	0	0.00529189	-2.69847	down
AT4G30170.1	1319	1359	1271	189	170	114	350.889	333.299	327.383	45.4376	40.457	30.2711	3.7e-122	-2.69799	down
AT3G13950.1	32	49	52	2	9	3	8.51286	12.0174	13.3941	0.480821	2.14184	0.796608	1.3e-06	-2.6958	down
ONT.4512.2	18	18	18	2	1	2	4.78848	4.41455	4.63642	0.480821	0.237983	0.531072	0.000298457	-2.69343	down
AT3G61280.1	34	15	19	6	0	0	9.04491	3.6788	4.894	1.44246	0	0	0.00124617	-2.6911	down
AT1G01480.1	13	17	16	2	0	2	3.45835	4.1693	4.12126	0.480821	0	0.531072	0.000867941	-2.69025	down
AT5G46890.1	303	375	275	44	37	32	80.6061	91.9699	70.8342	10.5781	8.80535	8.49716	2.76e-39	-2.68837	down
ONT.1633.1	27	23	29	2	4	2	7.18273	5.64082	7.46979	0.480821	0.95193	0.531072	2.7e-05	-2.68721	down
ONT.16309.1	12	20	14	1	1	2	3.19232	4.90506	3.6061	0.240411	0.237983	0.531072	0.000866501	-2.6869	down
AT1G52070.1	180	201	186	31	24	12	47.8848	49.2959	47.9097	7.45273	5.71158	3.18643	4.13e-25	-2.68667	down
AT3G01190.1	447	531	559	75	59	50	118.914	130.229	143.987	18.0308	14.041	13.2768	1.97e-57	-2.68631	down
AT1G69240.1	10	13	14	1	2	0	2.66027	3.18829	3.6061	0.240411	0.475965	0	0.00218817	-2.68612	down
AT1G66400.1	117	106	120	15	16	9	31.1251	25.9968	30.9095	3.60616	3.80772	2.38983	5.46e-17	-2.68456	down
AT5G06730.1	21	26	16	1	2	3	5.58656	6.37658	4.12126	0.240411	0.475965	0.796608	0.00016959	-2.68297	down
ONT.12794.2	9	10	10	0	0	2	2.39424	2.45253	2.57579	0	0	0.531072	0.00534873	-2.68205	down
ONT.7638.2	15	22	26	2	1	3	3.9904	5.39557	6.69705	0.480821	0.237983	0.796608	0.000190269	-2.68097	down
ONT.16645.4	122	109	108	18	5	16	32.4553	26.7326	27.8185	4.32739	1.18991	4.24858	8.49e-14	-2.68037	down
AT3G02840.1	17	28	26	2	2	3	4.52246	6.86708	6.69705	0.480821	0.475965	0.796608	7.5e-05	-2.67736	down
ONT.1579.3	6	15	8	1	1	0	1.59616	3.6788	2.06063	0.240411	0.237983	0	0.00601044	-2.67707	down
AT3G44450.1	64	102	96	14	10	6	17.0257	25.0158	24.7276	3.36575	2.37983	1.59322	1.01e-11	-2.67635	down
ONT.2011.5	33	19	27	3	2	3	8.77889	4.65981	6.95463	0.721232	0.475965	0.796608	4.48e-05	-2.6754	down
AT5G17390.1	17	25	20	3	1	2	4.52246	6.13133	5.15158	0.721232	0.237983	0.531072	0.000167601	-2.67302	down
AT4G21910.2	28	16	20	0	2	4	7.44875	3.92405	5.15158	0	0.475965	1.06214	0.00034205	-2.67238	down
ONT.8822.1	123	127	135	28	11	6	32.7213	31.1471	34.7731	6.7315	2.61781	1.59322	9.95e-13	-2.67056	down
AT5G08180.2	20	24	19	2	0	4	5.32054	5.88607	4.894	0.480821	0	1.06214	0.000230656	-2.66896	down
ONT.8068.2	12	7	9	1	1	0	3.19232	1.71677	2.31821	0.240411	0.237983	0	0.00578318	-2.6682	down
AT5G05960.1	681	738	717	106	80	74	181.164	180.997	184.684	25.4835	19.0386	19.6497	1.85e-89	-2.66815	down
AT2G24600.4	89	86	83	11	8	11	23.6764	21.0918	21.379	2.64452	1.90386	2.9209	1.71e-13	-2.66527	down
AT2G39210.1	1635	1920	1967	234	238	203	434.954	470.886	506.658	56.2561	56.6398	53.9038	8.02e-172	-2.66522	down
ONT.9748.3	18	11	17	1	0	3	4.78848	2.69778	4.37884	0.240411	0	0.796608	0.00132365	-2.66319	down
AT4G00955.1	110	124	146	20	12	13	29.263	30.4114	37.6065	4.80821	2.85579	3.45197	1.93e-17	-2.66176	down
ONT.2011.1	5	15	10	0	0	2	1.33013	3.6788	2.57579	0	0	0.531072	0.00713923	-2.65973	down
ONT.14197.1	8	8	12	1	0	1	2.12821	1.96202	3.09095	0.240411	0	0.265536	0.00580073	-2.65966	down
AT2G20515.1	85	107	68	16	6	8	22.6123	26.2421	17.5154	3.84657	1.4279	2.12429	3.86e-11	-2.65935	down
AT3G27950.1	9	13	7	0	0	2	2.39424	3.18829	1.80305	0	0	0.531072	0.00632477	-2.65847	down
ONT.14709.1	11	11	6	1	1	0	2.9263	2.69778	1.54547	0.240411	0.237983	0	0.00609	-2.65837	down
ONT.8743.1	22	20	19	4	1	1	5.85259	4.90506	4.894	0.961642	0.237983	0.265536	0.000216532	-2.65702	down
AT2G46140.1	147	151	136	19	18	15	39.1059	37.0332	35.0307	4.5678	4.28369	3.98304	3.36e-22	-2.65693	down
AT2G12646.1	8	12	8	1	0	1	2.12821	2.94304	2.06063	0.240411	0	0.265536	0.00578876	-2.65656	down
ONT.7962.1	10	12	6	1	1	0	2.66027	2.94304	1.54547	0.240411	0.237983	0	0.00617215	-2.65568	down
ONT.7630.1	33	40	45	6	4	3	8.77889	9.81012	11.591	1.44246	0.95193	0.796608	6.6e-07	-2.65346	down
ONT.615.2	7	5	17	1	1	0	1.86219	1.22627	4.37884	0.240411	0.237983	0	0.00778587	-2.65306	down
AT1G24140.1	16	28	44	4	3	2	4.25643	6.86708	11.3335	0.961642	0.713948	0.531072	7.11e-05	-2.65257	down
AT1G50060.1	91	154	128	13	19	12	24.2084	37.769	32.9701	3.12534	4.52167	3.18643	2.33e-15	-2.65239	down
AT4G34880.1	9	12	7	0	1	1	2.39424	2.94304	1.80305	0	0.237983	0.265536	0.00595587	-2.6522	down
ONT.14185.2	13	15	9	3	0	0	3.45835	3.6788	2.31821	0.721232	0	0	0.00336714	-2.65217	down
AT5G23830.1	451	537	553	73	61	55	119.978	131.701	142.441	17.55	14.5169	14.6045	3.43e-61	-2.65143	down
AT3G03780.1	9	13	14	1	1	1	2.39424	3.18829	3.6061	0.240411	0.237983	0.265536	0.00243412	-2.65061	down
AT5G37550.1	15	12	9	1	1	1	3.9904	2.94304	2.31821	0.240411	0.237983	0.265536	0.00251482	-2.65038	down
ONT.10021.2	23	24	15	4	0	2	6.11862	5.88607	3.86368	0.961642	0	0.531072	0.000334021	-2.65011	down
AT1G64400.1	136	177	154	24	13	19	36.1797	43.4098	39.6671	5.76985	3.09377	5.04519	2.85e-21	-2.64964	down
AT1G61050.1	31	38	49	6	4	3	8.24683	9.31961	12.6214	1.44246	0.95193	0.796608	1.16e-06	-2.64756	down
AT2G25160.1	27	47	38	7	1	4	7.18273	11.5269	9.78799	1.68287	0.237983	1.06214	6.48e-06	-2.64708	down
AT1G68600.1	61	71	66	8	8	7	16.2276	17.413	17.0002	1.92328	1.90386	1.85875	8.14e-11	-2.64655	down
AT2G43500.1	30	38	28	0	7	3	7.98081	9.31961	7.21221	0	1.66588	0.796608	3.44e-05	-2.64394	down
ONT.5625.3	80	82	69	6	11	10	21.2821	20.1107	17.7729	1.44246	2.61781	2.65536	9.8e-12	-2.6439	down
AT1G53700.1	53	68	47	6	4	9	14.0994	16.6772	12.1062	1.44246	0.95193	2.38983	1.38e-08	-2.64378	down
AT5G22530.1	12	14	18	1	2	1	3.19232	3.43354	4.63642	0.240411	0.475965	0.265536	0.00112247	-2.64243	down
ONT.984.1	11	15	18	2	2	0	2.9263	3.6788	4.63642	0.480821	0.475965	0	0.00135792	-2.63633	down
ONT.11971.3	12	9	25	3	0	1	3.19232	2.20728	6.43947	0.721232	0	0.265536	0.00241368	-2.63474	down
AT4G25070.1	50	57	44	2	7	8	13.3013	13.9794	11.3335	0.480821	1.66588	2.12429	9.61e-08	-2.6345	down
AT4G29700.1	38	35	43	5	5	3	10.109	8.58386	11.0759	1.20205	1.18991	0.796608	7.18e-07	-2.63416	down
AT1G24430.1	14	19	19	2	3	0	3.72438	4.65981	4.894	0.480821	0.713948	0	0.000621815	-2.6324	down
AT1G34670.1	8	9	11	0	0	2	2.12821	2.20728	2.83337	0	0	0.531072	0.00683759	-2.63109	down
AT4G40020.1	33	34	41	4	4	4	8.77889	8.3386	10.5607	0.961642	0.95193	1.06214	1.5e-06	-2.63059	down
AT1G69880.1	238	313	267	49	34	18	63.3144	76.7642	68.7735	11.7801	8.09141	4.77965	2.72e-26	-2.6285	down
AT1G06830.1	79	94	87	7	15	9	21.0161	23.0538	22.4094	1.68287	3.56974	2.38983	9.64e-13	-2.62701	down
ONT.4461.2	457	494	529	64	66	55	121.574	121.155	136.259	15.3863	15.7068	14.6045	2.72e-63	-2.62541	down
AT4G39720.1	7	14	15	1	2	0	1.86219	3.43354	3.86368	0.240411	0.475965	0	0.00352188	-2.62443	down
AT1G54217.2	20	23	34	3	1	4	5.32054	5.64082	8.75768	0.721232	0.237983	1.06214	8.25e-05	-2.6232	down
AT1G66440.1	7	9	11	1	1	0	1.86219	2.20728	2.83337	0.240411	0.237983	0	0.00684848	-2.62242	down
ONT.6085.1	27	31	18	3	3	2	7.18273	7.60284	4.63642	0.721232	0.713948	0.531072	5.91e-05	-2.62238	down
ONT.17136.3	18	35	38	2	0	7	4.78848	8.58386	9.78799	0.480821	0	1.85875	0.000248928	-2.61933	down
ONT.12688.3	10	14	12	0	3	0	2.66027	3.43354	3.09095	0	0.713948	0	0.00374895	-2.61853	down
AT1G56240.1	40	54	33	1	9	4	10.6411	13.2437	8.5001	0.240411	2.14184	1.06214	4.8e-06	-2.61825	down
AT5G02420.1	209	167	170	20	18	29	55.5996	40.9573	43.7884	4.80821	4.28369	7.70055	2.25e-21	-2.61804	down
ONT.13635.1	30	38	24	3	3	4	7.98081	9.31961	6.18189	0.721232	0.713948	1.06214	1.15e-05	-2.61788	down
AT3G02240.1	189	204	242	31	25	23	50.2791	50.0316	62.3341	7.45273	5.94956	6.10733	1.37e-27	-2.61469	down
AT1G79310.1	9	10	17	0	1	2	2.39424	2.45253	4.37884	0	0.237983	0.531072	0.00357649	-2.61351	down
AT1G02570.1	24	18	17	2	2	2	6.38464	4.41455	4.37884	0.480821	0.475965	0.531072	0.000262239	-2.61266	down
ONT.6308.2	42	55	58	5	6	7	11.1731	13.4889	14.9396	1.20205	1.4279	1.85875	2.44e-08	-2.61201	down
AT2G28160.1	14	18	19	1	3	1	3.72438	4.41455	4.894	0.240411	0.713948	0.265536	0.000631647	-2.60842	down
AT4G09100.1	12	15	17	0	1	3	3.19232	3.6788	4.37884	0	0.237983	0.796608	0.00160567	-2.60789	down
AT5G24655.1	87	84	116	13	12	10	23.1443	20.6013	29.8791	3.12534	2.85579	2.65536	3.03e-13	-2.60571	down
ONT.10085.3	13	20	20	1	0	4	3.45835	4.90506	5.15158	0.240411	0	1.06214	0.000965574	-2.60528	down
AT2G03830.1	12	14	18	0	1	3	3.19232	3.43354	4.63642	0	0.237983	0.796608	0.00168635	-2.60525	down
ONT.10883.1	35	67	34	2	1	11	9.31094	16.432	8.75768	0.480821	0.237983	2.9209	7.8e-05	-2.60509	down
AT5G05790.1	79	90	86	9	12	10	21.0161	22.0728	22.1518	2.1637	2.85579	2.65536	3.19e-13	-2.60413	down
AT2G28690.1	24	28	31	4	1	4	6.38464	6.86708	7.98494	0.961642	0.237983	1.06214	3.16e-05	-2.60263	down
AT5G52750.1	417	520	497	62	67	53	110.933	127.532	128.017	14.9055	15.9448	14.0734	2.34e-58	-2.60073	down
AT1G02430.1	13	7	16	3	0	0	3.45835	1.71677	4.12126	0.721232	0	0	0.00527196	-2.59739	down
AT1G54000.1	867	992	855	158	106	85	230.645	243.291	220.23	37.9849	25.2261	22.5706	1.72e-64	-2.59001	down
ONT.7206.2	92	103	112	18	9	11	24.4745	25.2611	28.8488	4.32739	2.14184	2.9209	2.21e-14	-2.58989	down
ONT.9250.1	25	18	31	4	3	1	6.65067	4.41455	7.98494	0.961642	0.713948	0.265536	0.000112746	-2.58881	down
AT4G17615.2	15	11	9	0	1	2	3.9904	2.69778	2.31821	0	0.237983	0.531072	0.00378352	-2.58853	down
AT4G15390.1	2325	2400	2655	347	319	288	618.512	588.607	683.872	83.4225	75.9164	76.4744	1.53e-195	-2.58786	down
ONT.10031.1	19	17	14	3	1	1	5.05451	4.1693	3.6061	0.721232	0.237983	0.265536	0.000749065	-2.5855	down
AT3G57630.1	51	71	77	13	7	4	13.5674	17.413	19.8336	3.12534	1.66588	1.06214	6.11e-09	-2.58521	down
ONT.7916.2	20	13	10	1	3	0	5.32054	3.18829	2.57579	0.240411	0.713948	0	0.00234893	-2.58395	down
AT5G46230.1	118	143	121	18	17	13	31.3912	35.0712	31.167	4.32739	4.0457	3.45197	7.05e-19	-2.58298	down
ONT.4107.2	23	30	29	6	3	0	6.11862	7.35759	7.46979	1.44246	0.713948	0	7.85e-05	-2.58288	down
ONT.8696.2	42	44	58	10	4	3	11.1731	10.7911	14.9396	2.40411	0.95193	0.796608	3.95e-07	-2.58274	down
AT4G10390.1	28	33	37	3	2	6	7.44875	8.09335	9.53042	0.721232	0.475965	1.59322	9.75e-06	-2.58252	down
AT5G04970.1	10	14	19	2	0	2	2.66027	3.43354	4.894	0.480821	0	0.531072	0.00198582	-2.58207	down
ONT.12319.3	306	404	378	78	30	11	81.4042	99.0822	97.3648	18.752	7.13948	2.9209	0.000195883	-2.58198	down
AT1G07175.1	8	9	9	1	1	0	2.12821	2.20728	2.31821	0.240411	0.237983	0	0.00790348	-2.58186	down
AT3G53670.2	8	8	10	1	1	0	2.12821	1.96202	2.57579	0.240411	0.237983	0	0.00805146	-2.58064	down
AT1G47740.2	25	19	32	0	6	2	6.65067	4.65981	8.24252	0	1.4279	0.531072	0.000281483	-2.58061	down
ONT.15423.5	19	22	18	2	0	4	5.05451	5.39557	4.63642	0.480821	0	1.06214	0.000448724	-2.57914	down
AT1G78780.1	11	11	5	2	0	0	2.9263	2.69778	1.28789	0.480821	0	0	0.00980957	-2.57787	down
AT5G37990.1	69	98	84	13	10	8	18.3559	24.0348	21.6366	3.12534	2.37983	2.12429	3.5e-12	-2.57767	down
ONT.13670.2	9	18	16	3	0	1	2.39424	4.41455	4.12126	0.721232	0	0.265536	0.00231152	-2.57482	down
AT3G26840.1	36	40	60	6	8	2	9.57697	9.81012	15.4547	1.44246	1.90386	0.531072	1.39e-06	-2.5744	down
AT4G35390.1	11	11	12	2	0	1	2.9263	2.69778	3.09095	0.480821	0	0.265536	0.00377504	-2.57404	down
AT5G42510.1	9	9	8	0	1	1	2.39424	2.20728	2.06063	0	0.237983	0.265536	0.00814419	-2.57118	down
AT2G24850.1	9	6	11	1	1	0	2.39424	1.47152	2.83337	0.240411	0.237983	0	0.0088767	-2.57067	down
AT5G16770.1	9	7	10	1	0	1	2.39424	1.71677	2.57579	0.240411	0	0.265536	0.00842582	-2.56992	down
AT2G25810.1	42	61	63	6	7	7	11.1731	14.9604	16.2275	1.44246	1.66588	1.85875	1.77e-08	-2.56874	down
AT3G19710.1	935	1061	1016	142	125	127	248.735	260.213	261.7	34.1383	29.7478	33.7231	2.91e-125	-2.5652	down
AT1G63930.1	12	7	15	1	1	1	3.19232	1.71677	3.86368	0.240411	0.237983	0.265536	0.00431232	-2.56517	down
ONT.3434.1	106	93	73	14	9	11	28.1988	22.8085	18.8033	3.36575	2.14184	2.9209	2.73e-12	-2.56463	down
AT1G06120.1	12	14	8	1	2	0	3.19232	3.43354	2.06063	0.240411	0.475965	0	0.00433367	-2.56453	down
ONT.7115.2	100	101	115	12	16	12	26.6027	24.7706	29.6216	2.88493	3.80772	3.18643	2.1e-15	-2.56344	down
AT1G14220.1	13	21	16	1	1	3	3.45835	5.15031	4.12126	0.240411	0.237983	0.796608	0.000909414	-2.56031	down
AT5G53110.1	169	172	177	30	19	18	44.9585	42.1835	45.5914	7.21232	4.52167	4.77965	6.49e-24	-2.55693	down
AT5G47910.1	263	318	325	43	38	37	69.9651	77.9905	83.7131	10.3377	9.04334	9.82484	5.48e-39	-2.55673	down
AT5G25250.1	136	134	141	21	19	13	36.1797	32.8639	36.3186	5.04862	4.52167	3.45197	7.08e-20	-2.55436	down
AT1G25510.1	42	47	37	4	4	7	11.1731	11.5269	9.53042	0.961642	0.95193	1.85875	5.25e-07	-2.55293	down
AT3G17420.1	152	158	207	24	25	18	40.4361	38.75	53.3188	5.76985	5.94956	4.77965	5.66e-21	-2.54983	down
AT5G01280.1	6	12	8	1	0	1	1.59616	2.94304	2.06063	0.240411	0	0.265536	0.00953677	-2.54891	down
AT3G47220.1	24	12	14	1	1	3	6.38464	2.94304	3.6061	0.240411	0.237983	0.796608	0.0013333	-2.54884	down
AT4G14060.1	9	34	34	2	2	4	2.39424	8.3386	8.75768	0.480821	0.475965	1.06214	0.000569698	-2.54663	down
ONT.1973.2	5	24	16	0	2	2	1.33013	5.88607	4.12126	0	0.475965	0.531072	0.00433853	-2.54627	down
ONT.14037.1	64	59	69	7	10	7	17.0257	14.4699	17.7729	1.68287	2.37983	1.85875	7.32e-10	-2.54592	down
AT3G49845.1	35	35	39	7	4	2	9.31094	8.58386	10.0456	1.68287	0.95193	0.531072	3.25e-06	-2.54505	down
AT4G25090.2	41	40	61	3	6	8	10.9071	9.81012	15.7123	0.721232	1.4279	2.12429	7.39e-07	-2.54478	down
AT5G53990.1	42	43	32	4	7	3	11.1731	10.5459	8.24252	0.961642	1.66588	0.796608	1.65e-06	-2.54408	down
AT3G07000.1	19	23	15	4	0	2	5.05451	5.64082	3.86368	0.961642	0	0.531072	0.000677859	-2.53822	down
AT1G31540.1	17	10	7	2	0	1	4.52246	2.45253	1.80305	0.480821	0	0.265536	0.0057494	-2.53816	down
AT1G79680.1	24	18	15	4	0	2	6.38464	4.41455	3.86368	0.961642	0	0.531072	0.000761999	-2.53777	down
ONT.14102.2	5	18	12	2	0	1	1.33013	4.41455	3.09095	0.480821	0	0.265536	0.006465	-2.53699	down
AT4G22080.1	29	35	30	2	6	3	7.71478	8.58386	7.72736	0.480821	1.4279	0.796608	1.33e-05	-2.53688	down
AT3G60420.1	20	15	29	2	3	2	5.32054	3.6788	7.46979	0.480821	0.713948	0.531072	0.000323811	-2.53664	down
AT3G50930.1	43	35	48	2	5	8	11.4392	8.58386	12.3638	0.480821	1.18991	2.12429	2.38e-06	-2.53662	down
AT2G32487.1	38	46	63	6	7	5	10.109	11.2816	16.2275	1.44246	1.66588	1.32768	2.22e-07	-2.53599	down
AT1G21520.1	81	117	113	18	14	8	21.5482	28.6946	29.1064	4.32739	3.33176	2.12429	2.87e-13	-2.53443	down
AT5G09290.1	21	18	18	2	0	4	5.58656	4.41455	4.63642	0.480821	0	1.06214	0.000645826	-2.53319	down
AT5G45070.1	38	25	38	4	5	3	10.109	6.13133	9.78799	0.961642	1.18991	0.796608	1.03e-05	-2.53289	down
AT1G67800.1	25	38	31	6	2	3	6.65067	9.31961	7.98494	1.44246	0.475965	0.796608	1.83e-05	-2.53165	down
AT2G38380.1	104	105	130	17	13	14	27.6668	25.7516	33.4852	4.08698	3.09377	3.71751	1.34e-15	-2.5308	down
ONT.11919.8	15	10	8	1	1	1	3.9904	2.45253	2.06063	0.240411	0.237983	0.265536	0.00484578	-2.53059	down
AT3G14280.1	270	292	295	45	35	34	71.8273	71.6139	75.9857	10.8185	8.32939	9.02823	3.87e-39	-2.5291	down
AT3G23635.1	9	12	12	2	0	1	2.39424	2.94304	3.09095	0.480821	0	0.265536	0.00482465	-2.52877	down
AT1G29000.1	10	13	10	2	0	1	2.66027	3.18829	2.57579	0.480821	0	0.265536	0.00479702	-2.52873	down
ONT.8786.1	24	35	20	4	2	3	6.38464	8.58386	5.15158	0.961642	0.475965	0.796608	7.28e-05	-2.52835	down
AT2G28780.1	31	23	17	3	4	1	8.24683	5.64082	4.37884	0.721232	0.95193	0.265536	0.000198157	-2.5263	down
AT2G43670.1	7	12	14	1	1	1	1.86219	2.94304	3.6061	0.240411	0.237983	0.265536	0.00494926	-2.5247	down
AT5G44990.3	15	14	5	1	2	0	3.9904	3.43354	1.28789	0.240411	0.475965	0	0.00669144	-2.52438	down
ONT.1551.2	223	341	340	48	46	26	59.324	83.6313	87.5768	11.5397	10.9472	6.90394	3.33e-25	-2.52315	down
AT1G79860.1	10	12	11	1	0	2	2.66027	2.94304	2.83337	0.240411	0	0.531072	0.00481128	-2.52246	down
AT3G49190.1	27	22	21	4	2	2	7.18273	5.39557	5.40915	0.961642	0.475965	0.531072	0.000124205	-2.52044	down
ONT.16449.2	29	57	53	8	6	3	7.71478	13.9794	13.6517	1.92328	1.4279	0.796608	1.71e-06	-2.51736	down
AT4G01110.1	26	22	29	4	3	2	6.9167	5.39557	7.46979	0.961642	0.713948	0.531072	6.33e-05	-2.51446	down
AT1G11540.1	15	13	12	1	1	2	3.9904	3.18829	3.09095	0.240411	0.237983	0.531072	0.00222757	-2.51406	down
AT2G26480.1	42	45	49	6	8	3	11.1731	11.0364	12.6214	1.44246	1.90386	0.796608	2.61e-07	-2.51271	down
ONT.13613.1	22	15	26	1	4	2	5.85259	3.6788	6.69705	0.240411	0.95193	0.531072	0.000413849	-2.51151	down
AT2G35730.1	16	22	17	1	3	2	4.25643	5.39557	4.37884	0.240411	0.713948	0.531072	0.000557931	-2.50862	down
AT4G26790.1	22	17	16	4	2	0	5.85259	4.1693	4.12126	0.961642	0.475965	0	0.000838486	-2.50847	down
AT5G01100.1	33	43	33	10	2	1	8.77889	10.5459	8.5001	2.40411	0.475965	0.265536	4.46e-05	-2.50686	down
AT1G20510.1	155	182	193	34	23	14	41.2342	44.636	49.7127	8.17396	5.4736	3.71751	1.9e-20	-2.5061	down
AT2G37040.1	1562	1729	1880	289	220	198	415.534	424.042	484.248	69.4787	52.3562	52.5762	1.21e-108	-2.50609	down
AT1G35290.1	30	53	56	4	5	8	7.98081	12.9984	14.4244	0.961642	1.18991	2.12429	1.63e-06	-2.5043	down
ONT.715.1	53	50	40	9	7	2	14.0994	12.2627	10.3032	2.1637	1.66588	0.531072	4.59e-07	-2.50406	down
AT2G29990.1	89	86	106	11	18	8	23.6764	21.0918	27.3034	2.64452	4.28369	2.12429	2.57e-12	-2.50072	down
AT5G44820.1	92	97	100	9	14	15	24.4745	23.7895	25.7579	2.1637	3.33176	3.98304	1.07e-13	-2.4997	down
AT3G09925.1	16	12	19	3	1	1	4.25643	2.94304	4.894	0.721232	0.237983	0.265536	0.0014479	-2.49818	down
AT5G11100.1	44	56	57	10	5	5	11.7052	13.7342	14.682	2.40411	1.18991	1.32768	5.86e-08	-2.49745	down
AT2G45890.1	24	34	49	6	5	2	6.38464	8.3386	12.6214	1.44246	1.18991	0.531072	2.04e-05	-2.49595	down
ONT.3440.6	21	27	21	2	3	3	5.58656	6.62183	5.40915	0.480821	0.713948	0.796608	0.0001328	-2.49392	down
AT1G30550.2	19	30	22	6	0	2	5.05451	7.35759	5.66673	1.44246	0	0.531072	0.000429564	-2.49353	down
ONT.2528.3	46	41	47	8	5	4	12.2372	10.0554	12.1062	1.92328	1.18991	1.06214	3.15e-07	-2.49334	down
AT1G26420.1	123	135	144	20	16	18	32.7213	33.1092	37.0913	4.80821	3.80772	4.77965	5.38e-19	-2.49165	down
AT3G06460.1	29	36	33	7	3	2	7.71478	8.82911	8.5001	1.68287	0.713948	0.531072	1.36e-05	-2.49108	down
AT4G25310.1	19	11	17	2	3	0	5.05451	2.69778	4.37884	0.480821	0.713948	0	0.00188208	-2.48995	down
ONT.10100.1	37	48	64	2	14	2	9.84299	11.7721	16.485	0.480821	3.33176	0.531072	4.76e-05	-2.4898	down
ONT.18398.1	12	13	14	2	1	1	3.19232	3.18829	3.6061	0.480821	0.237983	0.265536	0.00254238	-2.4889	down
AT2G28570.1	379	369	374	49	57	48	100.824	90.4984	96.3345	11.7801	13.565	12.7457	8.41e-49	-2.48881	down
AT3G63050.1	15	20	12	1	3	1	3.9904	4.90506	3.09095	0.240411	0.713948	0.265536	0.00148291	-2.48847	down
AT5G67210.1	53	61	49	8	10	3	14.0994	14.9604	12.6214	1.92328	2.37983	0.796608	4.58e-08	-2.48828	down
AT4G23600.1	14	21	26	0	0	6	3.72438	5.15031	6.69705	0	0	1.59322	0.00307269	-2.48668	down
AT4G22305.1	124	111	130	13	19	17	32.9873	27.2231	33.4852	3.12534	4.52167	4.51411	1.88e-16	-2.48655	down
AT2G36090.1	161	180	182	30	19	22	42.8303	44.1455	46.8793	7.21232	4.52167	5.84179	1.28e-23	-2.4865	down
AT5G12420.1	130	143	141	21	18	17	34.5835	35.0712	36.3186	5.04862	4.28369	4.51411	4.42e-20	-2.48527	down
AT1G28480.1	37	18	38	7	1	3	9.84299	4.41455	9.78799	1.68287	0.237983	0.796608	0.000170909	-2.48518	down
AT4G22840.1	78	91	87	10	15	9	20.7501	22.318	22.4094	2.40411	3.56974	2.38983	2.09e-12	-2.48411	down
AT2G23050.1	23	18	13	2	3	1	6.11862	4.41455	3.34852	0.480821	0.713948	0.265536	0.000826616	-2.48396	down
ONT.2271.2	17	19	25	3	3	1	4.52246	4.65981	6.43947	0.721232	0.713948	0.265536	0.000377436	-2.48348	down
AT4G28940.1	54	46	47	9	6	4	14.3655	11.2816	12.1062	2.1637	1.4279	1.06214	1.27e-07	-2.47874	down
AT3G58990.1	575	661	610	97	81	78	152.965	162.112	157.123	23.3198	19.2766	20.7118	1e-76	-2.47846	down
ONT.13594.2	42	33	36	7	4	3	11.1731	8.09335	9.27284	1.68287	0.95193	0.796608	3.99e-06	-2.47626	down
AT4G21830.1	61	54	69	12	4	8	16.2276	13.2437	17.7729	2.88493	0.95193	2.12429	2.12e-08	-2.47534	down
ONT.15349.1	16	12	11	3	1	0	4.25643	2.94304	2.83337	0.721232	0.237983	0	0.00364038	-2.47347	down
AT2G45570.1	13	13	13	2	0	2	3.45835	3.18829	3.34852	0.480821	0	0.531072	0.00304185	-2.47233	down
ONT.15162.2	15	13	18	2	1	2	3.9904	3.18829	4.63642	0.480821	0.237983	0.531072	0.00144416	-2.47157	down
AT4G04700.1	45	48	46	7	8	3	11.9712	11.7721	11.8486	1.68287	1.90386	0.796608	2.25e-07	-2.47043	down
AT5G65230.1	14	9	16	1	1	2	3.72438	2.20728	4.12126	0.240411	0.237983	0.531072	0.00328026	-2.46967	down
AT1G33030.1	145	139	118	22	20	13	38.5739	34.0902	30.3943	5.28903	4.75965	3.45197	7.45e-18	-2.46875	down
ONT.18308.1	24	31	35	6	1	4	6.38464	7.60284	9.01526	1.44246	0.237983	1.06214	5.03e-05	-2.46329	down
AT3G06035.1	202	242	204	36	29	25	53.7374	59.3512	52.5461	8.65478	6.90149	6.6384	7.06e-29	-2.46035	down
AT1G03820.1	19	30	41	4	5	2	5.05451	7.35759	10.5607	0.961642	1.18991	0.531072	7.63e-05	-2.45985	down
AT3G50800.1	31	37	58	4	7	5	8.24683	9.07436	14.9396	0.961642	1.66588	1.32768	4.69e-06	-2.45928	down
ONT.16827.1	9	19	11	1	2	1	2.39424	4.65981	2.83337	0.240411	0.475965	0.265536	0.00369843	-2.45673	down
AT1G67360.1	20	27	20	4	3	1	5.32054	6.62183	5.15158	0.961642	0.713948	0.265536	0.000232625	-2.45552	down
AT4G24310.1	71	95	71	13	11	8	18.8879	23.299	18.2881	3.12534	2.61781	2.12429	4.05e-11	-2.45314	down
ONT.6056.2	15	15	15	2	2	1	3.9904	3.6788	3.86368	0.480821	0.475965	0.265536	0.00151486	-2.45153	down
ONT.15469.1	27	27	22	0	4	5	7.18273	6.62183	5.66673	0	0.95193	1.32768	0.000226009	-2.4512	down
AT5G53090.1	26	21	52	3	3	6	6.9167	5.15031	13.3941	0.721232	0.713948	1.59322	0.000126212	-2.45017	down
AT5G22570.1	37	32	40	8	4	2	9.84299	7.8481	10.3032	1.92328	0.95193	0.531072	8.84e-06	-2.44785	down
AT5G67450.1	69	73	79	11	11	8	18.3559	17.9035	20.3487	2.64452	2.61781	2.12429	6.2e-11	-2.44772	down
AT5G13900.1	26	33	36	4	4	4	6.9167	8.09335	9.27284	0.961642	0.95193	1.06214	1.45e-05	-2.44719	down
AT1G64405.1	134	174	165	26	24	16	35.6476	42.674	42.5005	6.25068	5.71158	4.24858	1.9e-20	-2.44439	down
ONT.4522.1	62	81	65	9	8	11	16.4937	19.8655	16.7426	2.1637	1.90386	2.9209	4.71e-10	-2.44278	down
AT1G10400.1	26	13	14	3	1	2	6.9167	3.18829	3.6061	0.721232	0.237983	0.531072	0.00140718	-2.44276	down
ONT.12426.1	24	32	32	2	5	4	6.38464	7.8481	8.24252	0.480821	1.18991	1.06214	3.62e-05	-2.44099	down
ONT.1972.2	34	28	32	6	3	3	9.04491	6.86708	8.24252	1.44246	0.713948	0.796608	1.94e-05	-2.43798	down
AT5G16170.1	43	52	55	8	7	5	11.4392	12.7532	14.1668	1.92328	1.66588	1.32768	8.81e-08	-2.43713	down
ONT.4995.1	24	32	25	7	2	1	6.38464	7.8481	6.43947	1.68287	0.475965	0.265536	0.000146649	-2.43693	down
AT3G46110.1	26	29	25	4	5	1	6.9167	7.11234	6.43947	0.961642	1.18991	0.265536	7.59e-05	-2.4369	down
AT4G39640.2	79	88	126	11	13	16	21.0161	21.5823	32.4549	2.64452	3.09377	4.24858	2.89e-11	-2.43624	down
AT2G24610.1	23	23	20	5	2	1	6.11862	5.64082	5.15158	1.20205	0.475965	0.265536	0.000301099	-2.43621	down
AT2G42890.3	13	18	18	0	0	5	3.45835	4.41455	4.63642	0	0	1.32768	0.00415216	-2.43616	down
AT1G49000.1	54	60	64	7	9	8	14.3655	14.7152	16.485	1.68287	2.14184	2.12429	5.01e-09	-2.43586	down
AT4G21120.1	203	237	225	46	26	22	54.0035	58.125	57.9552	11.0589	6.18755	5.84179	2.2e-24	-2.43585	down
AT3G50010.1	80	73	80	11	11	10	21.2821	17.9035	20.6063	2.64452	2.61781	2.65536	2.19e-11	-2.43492	down
AT5G49850.1	141	124	170	27	18	16	37.5098	30.4114	43.7884	6.49109	4.28369	4.24858	1.18e-16	-2.43484	down
ONT.2403.2	31	48	37	4	5	6	8.24683	11.7721	9.53042	0.961642	1.18991	1.59322	3.32e-06	-2.43268	down
ONT.15795.2	20	11	14	2	1	2	5.32054	2.69778	3.6061	0.480821	0.237983	0.531072	0.00216195	-2.43246	down
AT2G39410.2	18	27	44	6	3	2	4.78848	6.62183	11.3335	1.44246	0.713948	0.531072	0.000170101	-2.43225	down
AT1G70990.1	117	157	133	20	18	19	31.1251	38.5047	34.258	4.80821	4.28369	5.04519	3.08e-18	-2.42927	down
AT4G20000.1	351	420	439	56	62	55	93.3754	103.006	113.077	13.463	14.7549	14.6045	1.49e-45	-2.42756	down
AT5G26920.2	12	20	21	3	0	3	3.19232	4.90506	5.40915	0.721232	0	0.796608	0.00149276	-2.42652	down
AT4G01480.1	745	859	790	128	104	113	198.19	210.672	203.487	30.7726	24.7502	30.0056	3.72e-91	-2.4238	down
AT5G19520.1	66	73	66	16	5	7	17.5578	17.9035	17.0002	3.84657	1.18991	1.85875	8.02e-09	-2.42277	down
AT5G10380.1	221	236	244	34	30	36	58.7919	57.8797	62.8492	8.17396	7.13948	9.5593	7.26e-31	-2.4227	down
ONT.7443.15	37	33	33	7	0	6	9.84299	8.09335	8.5001	1.68287	0	1.59322	6.02e-05	-2.42238	down
AT2G25240.1	68	59	77	8	11	9	18.0898	14.4699	19.8336	1.92328	2.61781	2.38983	1.37e-09	-2.42206	down
ONT.3981.1	36	32	40	2	6	6	9.57697	7.8481	10.3032	0.480821	1.4279	1.59322	9.47e-06	-2.42155	down
AT4G25240.1	24	39	38	6	3	4	6.38464	9.56487	9.78799	1.44246	0.713948	1.06214	1.83e-05	-2.42136	down
ONT.1733.2	34	39	28	2	7	4	9.04491	9.56487	7.21221	0.480821	1.66588	1.06214	1.85e-05	-2.42034	down
AT2G47360.1	34	40	49	6	2	8	9.04491	9.81012	12.6214	1.44246	0.475965	2.12429	5.62e-06	-2.42025	down
AT1G72280.1	47	54	54	7	9	5	12.5033	13.2437	13.9093	1.68287	2.14184	1.32768	5.42e-08	-2.42017	down
AT2G34150.1	37	41	39	4	11	0	9.84299	10.0554	10.0456	0.961642	2.61781	0	8.68e-05	-2.41595	down
ONT.13594.1	29	29	17	7	0	2	7.71478	7.11234	4.37884	1.68287	0	0.531072	0.000787903	-2.41388	down
AT1G06160.1	125	109	119	14	24	12	33.2534	26.7326	30.6519	3.36575	5.71158	3.18643	1.3e-14	-2.41287	down
ONT.4843.1	108	120	131	22	18	11	28.7309	29.4304	33.7428	5.28903	4.28369	2.9209	1.35e-15	-2.412	down
AT2G30550.1	17	13	14	3	2	0	4.52246	3.18829	3.6061	0.721232	0.475965	0	0.00252691	-2.41168	down
AT1G28230.1	110	136	114	16	23	12	29.263	33.3544	29.364	3.84657	5.4736	3.18643	1.04e-15	-2.41166	down
AT3G50280.1	8	10	12	2	1	0	2.12821	2.45253	3.09095	0.480821	0.237983	0	0.00866453	-2.4101	down
AT5G67520.1	128	185	151	20	27	19	34.0514	45.3718	38.8944	4.80821	6.42553	5.04519	9.06e-19	-2.40968	down
ONT.14720.2	97	86	101	12	14	14	25.8046	21.0918	26.0155	2.88493	3.33176	3.71751	4.87e-13	-2.40906	down
AT2G31180.1	11	14	12	1	1	2	2.9263	3.43354	3.09095	0.240411	0.237983	0.531072	0.00393889	-2.40741	down
AT3G07195.1	122	141	136	18	23	16	32.4553	34.5807	35.0307	4.32739	5.4736	4.24858	2.27e-18	-2.4065	down
AT1G31320.1	26	31	36	8	2	2	6.9167	7.60284	9.27284	1.92328	0.475965	0.531072	6.78e-05	-2.40605	down
AT5G41040.1	213	212	267	34	34	32	56.6637	51.9936	68.7735	8.17396	8.09141	8.49716	1.53e-26	-2.40424	down
AT1G75160.1	12	6	12	1	1	1	3.19232	1.47152	3.09095	0.240411	0.237983	0.265536	0.00904025	-2.40373	down
AT5G60520.1	7	9	14	1	1	1	1.86219	2.20728	3.6061	0.240411	0.237983	0.265536	0.00884777	-2.40159	down
ONT.5711.1	66	74	76	11	6	13	17.5578	18.1487	19.576	2.64452	1.4279	3.45197	7.51e-10	-2.40132	down
ONT.13473.3	7	10	13	2	1	0	1.86219	2.45253	3.34852	0.480821	0.237983	0	0.00946992	-2.40107	down
AT1G05675.1	26	33	26	6	3	2	6.9167	8.09335	6.69705	1.44246	0.713948	0.531072	5.71e-05	-2.40094	down
ONT.7011.1	18	24	16	3	4	0	4.78848	5.88607	4.12126	0.721232	0.95193	0	0.000933961	-2.40043	down
ONT.7731.1	367	372	402	63	65	39	97.6319	91.2341	103.547	15.1459	15.4689	10.3559	2.06e-41	-2.4002	down
AT3G28540.1	172	182	227	40	23	21	45.7566	44.636	58.4704	9.61642	5.4736	5.57626	1.6e-19	-2.39905	down
AT1G10970.1	128	149	140	18	26	16	34.0514	36.5427	36.061	4.32739	6.18755	4.24858	1.45e-18	-2.3974	down
ONT.12793.2	11	12	14	0	2	2	2.9263	2.94304	3.6061	0	0.475965	0.531072	0.0047001	-2.3954	down
AT1G65690.1	310	372	369	65	55	34	82.4683	91.2341	95.0466	15.6267	13.089	9.02823	2.35e-35	-2.39513	down
ONT.15963.1	16	21	21	2	1	4	4.25643	5.15031	5.40915	0.480821	0.237983	1.06214	0.000710562	-2.39481	down
AT4G01540.1	11	16	24	3	2	1	2.9263	3.92405	6.18189	0.721232	0.475965	0.265536	0.00175051	-2.39441	down
AT5G24140.1	59	43	64	10	9	4	15.6956	10.5459	16.485	2.40411	2.14184	1.06214	2.16e-07	-2.39353	down
AT5G33290.1	237	269	302	38	50	30	63.0484	65.9731	77.7888	9.1356	11.8991	7.96608	6.11e-29	-2.39332	down
ONT.11229.2	10	8	12	1	0	2	2.66027	1.96202	3.09095	0.240411	0	0.531072	0.00926583	-2.3927	down
AT3G15340.1	15	27	30	2	4	3	3.9904	6.62183	7.72736	0.480821	0.95193	0.796608	0.000305117	-2.3918	down
AT1G15210.1	117	118	99	18	16	14	31.1251	28.9399	25.5003	4.32739	3.80772	3.71751	2.52e-15	-2.39107	down
AT2G15390.2	93	140	130	25	15	12	24.7405	34.3354	33.4852	6.01027	3.56974	3.18643	1.73e-13	-2.38987	down
AT1G23720.1	148	151	112	14	25	20	39.372	37.0332	28.8488	3.36575	5.94956	5.31072	9.14e-16	-2.3896	down
AT2G25150.1	7	13	10	2	0	1	1.86219	3.18829	2.57579	0.480821	0	0.265536	0.00972327	-2.38943	down
AT3G56640.1	18	27	26	4	2	3	4.78848	6.62183	6.69705	0.961642	0.475965	0.796608	0.000204238	-2.38932	down
ONT.6553.2	19	24	9	2	1	3	5.05451	5.88607	2.31821	0.480821	0.237983	0.796608	0.00209194	-2.38874	down
AT1G30370.1	12	14	18	1	4	0	3.19232	3.43354	4.63642	0.240411	0.95193	0	0.00354838	-2.38799	down
AT4G17030.1	56	76	74	13	9	7	14.8975	18.6392	19.0608	3.12534	2.14184	1.85875	1.82e-09	-2.3874	down
ONT.1587.1	9	15	21	4	0	1	2.39424	3.6788	5.40915	0.961642	0	0.265536	0.00460079	-2.38727	down
AT3G04420.1	60	65	47	10	9	5	15.9616	15.9414	12.1062	2.40411	2.14184	1.32768	3.53e-08	-2.38672	down
ONT.1060.8	48	49	29	6	5	6	12.7693	12.0174	7.46979	1.44246	1.18991	1.59322	3.38e-06	-2.38664	down
AT1G65060.1	16	9	13	0	4	0	4.25643	2.20728	3.34852	0	0.95193	0	0.00834701	-2.38538	down
AT2G44940.1	157	192	171	31	28	17	41.7662	47.0886	44.046	7.45273	6.66351	4.51411	5.6e-22	-2.38417	down
AT1G26900.1	14	15	21	2	2	2	3.72438	3.6788	5.40915	0.480821	0.475965	0.531072	0.00131908	-2.38404	down
AT5G48410.1	21	27	23	1	4	4	5.58656	6.62183	5.92431	0.240411	0.95193	1.06214	0.000230492	-2.38116	down
AT3G47820.1	41	40	50	5	7	6	10.9071	9.81012	12.8789	1.20205	1.66588	1.59322	8.36e-07	-2.38112	down
AT5G65090.2	22	16	19	5	1	1	5.85259	3.92405	4.894	1.20205	0.237983	0.265536	0.00110102	-2.38052	down
ONT.15994.2	11	11	14	2	1	1	2.9263	2.69778	3.6061	0.480821	0.237983	0.265536	0.00470603	-2.38039	down
ONT.13952.1	42	52	64	11	8	3	11.1731	12.7532	16.485	2.64452	1.90386	0.796608	6.07e-07	-2.37675	down
AT1G79330.1	12	14	10	1	2	1	3.19232	3.43354	2.57579	0.240411	0.475965	0.265536	0.00479304	-2.37572	down
AT2G16660.1	429	530	566	82	92	53	114.126	129.984	145.79	19.7137	21.8944	14.0734	1.16e-39	-2.37475	down
ONT.6481.2	64	77	76	11	11	9	17.0257	18.8845	19.576	2.64452	2.61781	2.38983	1.84e-10	-2.37443	down
ONT.16211.1	74	68	75	10	10	11	19.686	16.6772	19.3184	2.40411	2.37983	2.9209	2.16e-10	-2.37409	down
AT2G42360.1	174	225	204	38	30	21	46.2887	55.1819	52.5461	9.1356	7.13948	5.57626	8.49e-24	-2.37243	down
ONT.18187.1	15	20	21	3	3	1	3.9904	4.90506	5.40915	0.721232	0.713948	0.265536	0.000822378	-2.36684	down
AT3G22740.1	25	29	29	5	2	4	6.65067	7.11234	7.46979	1.20205	0.475965	1.06214	6.6e-05	-2.36614	down
AT2G41800.1	129	176	137	27	22	16	34.3175	43.1645	35.2883	6.49109	5.23562	4.24858	5.31e-18	-2.36576	down
AT4G36640.1	193	202	223	38	31	23	51.3432	49.5411	57.4401	9.1356	7.37746	6.10733	2.41e-25	-2.36446	down
ONT.19281.1	16	18	15	2	3	1	4.25643	4.41455	3.86368	0.480821	0.713948	0.265536	0.00143521	-2.36278	down
AT5G24880.1	13	14	9	3	1	0	3.45835	3.43354	2.31821	0.721232	0.237983	0	0.00640114	-2.36202	down
AT3G18400.1	22	15	15	0	1	5	5.85259	3.6788	3.86368	0	0.237983	1.32768	0.00314821	-2.3601	down
AT3G25780.1	47	34	64	9	3	8	12.5033	8.3386	16.485	2.1637	0.713948	2.12429	6.32e-06	-2.35908	down
ONT.2270.1	9	13	14	1	3	0	2.39424	3.18829	3.6061	0.240411	0.713948	0	0.00648632	-2.35851	down
AT5G53420.1	170	214	183	42	18	24	45.2246	52.4841	47.1369	10.0972	4.28369	6.37287	1.36e-18	-2.3577	down
ONT.12609.3	13	9	14	3	0	1	3.45835	2.20728	3.6061	0.721232	0	0.265536	0.006729	-2.3571	down
ONT.6986.2	16	25	23	2	1	5	4.25643	6.13133	5.92431	0.480821	0.237983	1.32768	0.000678045	-2.3568	down
AT5G45650.1	73	61	62	11	5	12	19.42	14.9604	15.9699	2.64452	1.18991	3.18643	1.59e-08	-2.35481	down
ONT.18576.2	227	255	247	34	33	42	60.3881	62.5395	63.622	8.17396	7.85342	11.1525	3.16e-30	-2.35382	down
ONT.8567.1	13	25	13	0	4	2	3.45835	6.13133	3.34852	0	0.95193	0.531072	0.00290236	-2.35342	down
AT5G59470.1	36	38	41	5	5	6	9.57697	9.31961	10.5607	1.20205	1.18991	1.59322	3.06e-06	-2.35127	down
AT4G15530.5	36	49	36	2	3	11	9.57697	12.0174	9.27284	0.480821	0.713948	2.9209	5.14e-05	-2.35118	down
AT5G56320.1	25	24	33	3	5	3	6.65067	5.88607	8.5001	0.721232	1.18991	0.796608	9.02e-05	-2.35086	down
AT3G18280.1	748	902	890	150	133	103	198.988	221.218	229.245	36.0616	31.6517	27.3502	7.79e-76	-2.35047	down
ONT.16025.5	42	29	44	8	5	3	11.1731	7.11234	11.3335	1.92328	1.18991	0.796608	1.21e-05	-2.34998	down
ONT.11169.1	21	17	18	1	2	4	5.58656	4.1693	4.63642	0.240411	0.475965	1.06214	0.000984809	-2.3497	down
AT3G03780.2	1203	1354	1357	231	195	171	320.03	332.073	349.534	55.5349	46.4066	45.4067	3.58e-124	-2.3479	down
AT2G02010.1	23	43	30	6	4	3	6.11862	10.5459	7.72736	1.44246	0.95193	0.796608	4.81e-05	-2.34679	down
AT3G46330.1	20	18	17	2	3	2	5.32054	4.41455	4.37884	0.480821	0.713948	0.531072	0.000821951	-2.34601	down
AT1G13970.1	43	31	31	2	3	9	11.4392	7.60284	7.98494	0.480821	0.713948	2.38983	7.68e-05	-2.34561	down
ONT.15348.1	133	159	138	18	22	24	35.3816	38.9952	35.5459	4.32739	5.23562	6.37287	9.38e-19	-2.34558	down
AT3G44990.1	2502	2782	2540	412	392	392	665.599	682.294	654.25	99.0492	93.2892	104.09	1.69e-265	-2.34399	down
AT1G10657.1	26	32	37	0	3	9	6.9167	7.8481	9.53042	0	0.713948	2.38983	0.000561266	-2.34284	down
AT3G29000.1	28	32	39	3	1	9	7.44875	7.8481	10.0456	0.721232	0.237983	2.38983	0.00016786	-2.34117	down
ONT.766.1	11	25	20	3	3	1	2.9263	6.13133	5.15158	0.721232	0.713948	0.265536	0.00143337	-2.3411	down
AT4G08470.1	227	284	216	43	38	29	60.3881	69.6519	55.637	10.3377	9.04334	7.70055	7.12e-28	-2.33957	down
AT5G58940.1	72	83	90	18	14	4	19.1539	20.356	23.1821	4.32739	3.33176	1.06214	4.1e-09	-2.33957	down
AT1G70140.1	58	79	76	9	9	13	15.4296	19.375	19.576	2.1637	2.14184	3.45197	1.88e-09	-2.33441	down
ONT.11566.1	69	76	48	9	10	9	18.3559	18.6392	12.3638	2.1637	2.37983	2.38983	1.66e-08	-2.33422	down
AT4G26120.1	24	22	22	1	5	3	6.38464	5.39557	5.66673	0.240411	1.18991	0.796608	0.000383785	-2.32775	down
AT2G34020.1	40	33	33	6	5	4	10.6411	8.09335	8.5001	1.44246	1.18991	1.06214	9.88e-06	-2.32439	down
ONT.10127.3	19	49	56	9	4	4	5.05451	12.0174	14.4244	2.1637	0.95193	1.06214	9.66e-05	-2.32376	down
ONT.14999.1	8	7	21	1	2	1	2.12821	1.71677	5.40915	0.240411	0.475965	0.265536	0.00975094	-2.32353	down
AT2G43880.1	10	20	12	1	3	1	2.66027	4.90506	3.09095	0.240411	0.713948	0.265536	0.00432373	-2.32298	down
AT1G78120.1	55	48	56	7	5	11	14.6315	11.7721	14.4244	1.68287	1.18991	2.9209	2.68e-07	-2.32005	down
AT4G29800.2	20	26	23	0	5	4	5.32054	6.37658	5.92431	0	1.18991	1.06214	0.000641092	-2.31978	down
AT4G33730.1	28	35	30	4	6	3	7.44875	8.58386	7.72736	0.961642	1.4279	0.796608	3.15e-05	-2.31955	down
AT1G67940.1	285	360	316	56	47	45	75.8177	88.2911	81.3949	13.463	11.1852	11.9491	1.11e-37	-2.31917	down
ONT.9465.3	73	57	64	20	4	4	19.42	13.9794	16.485	4.80821	0.95193	1.06214	9.89e-06	-2.31739	down
AT4G04610.1	375	441	503	84	60	60	99.7601	108.157	129.562	20.1945	14.279	15.9322	4.88e-37	-2.31651	down
ONT.12274.1	28	28	37	3	6	4	7.44875	6.86708	9.53042	0.721232	1.4279	1.06214	4.42e-05	-2.31469	down
AT5G65160.1	17	29	22	4	5	0	4.52246	7.11234	5.66673	0.961642	1.18991	0	0.000806417	-2.31376	down
AT5G09800.1	71	97	92	12	14	13	18.8879	23.7895	23.6973	2.88493	3.33176	3.45197	2.02e-11	-2.31213	down
AT5G54020.1	17	25	19	2	2	4	4.52246	6.13133	4.894	0.480821	0.475965	1.06214	0.000677638	-2.31119	down
ONT.4291.1	22	22	23	2	6	1	5.85259	5.39557	5.92431	0.480821	1.4279	0.265536	0.000550852	-2.30931	down
AT2G23620.1	224	272	298	43	48	32	59.59	66.7088	76.7585	10.3377	11.4232	8.49716	8.75e-28	-2.30892	down
ONT.5218.1	38	44	49	7	5	7	10.109	10.7911	12.6214	1.68287	1.18991	1.85875	1.28e-06	-2.30795	down
AT5G58750.1	35	39	37	6	6	4	9.31094	9.56487	9.53042	1.44246	1.4279	1.06214	5.33e-06	-2.30635	down
AT1G17250.1	30	29	23	9	2	0	7.98081	7.11234	5.92431	2.1637	0.475965	0	0.0010039	-2.3051	down
AT1G02460.1	10	13	11	2	1	1	2.66027	3.18829	2.83337	0.480821	0.237983	0.265536	0.00681364	-2.30265	down
AT3G55370.2	31	36	44	6	6	4	8.24683	8.82911	11.3335	1.44246	1.4279	1.06214	8.99e-06	-2.30174	down
AT5G47960.1	59	56	72	13	10	5	15.6956	13.7342	18.5457	3.12534	2.37983	1.32768	4.28e-08	-2.30157	down
ONT.10078.2	33	31	36	4	2	8	8.77889	7.60284	9.27284	0.961642	0.475965	2.12429	4.86e-05	-2.30125	down
AT1G73040.1	11	25	26	5	3	0	2.9263	6.13133	6.69705	1.20205	0.713948	0	0.00222331	-2.30123	down
ONT.18178.2	71	74	61	12	10	9	18.8879	18.1487	15.7123	2.88493	2.37983	2.38983	1.25e-09	-2.3006	down
AT1G64780.1	102	111	101	15	16	17	27.1347	27.2231	26.0155	3.60616	3.80772	4.51411	2.74e-14	-2.30016	down
ONT.4078.3	24	23	26	6	4	0	6.38464	5.64082	6.69705	1.44246	0.95193	0	0.000499279	-2.30002	down
AT1G54890.1	11	23	14	1	3	2	2.9263	5.64082	3.6061	0.240411	0.713948	0.531072	0.00284571	-2.29963	down
AT5G01540.1	80	88	89	17	9	13	21.2821	21.5823	22.9245	4.08698	2.14184	3.45197	2.8e-11	-2.29939	down
ONT.1540.1	55	79	79	13	13	6	14.6315	19.375	20.3487	3.12534	3.09377	1.59322	7.77e-09	-2.29925	down
AT2G46535.1	50	62	62	10	12	4	13.3013	15.2057	15.9699	2.40411	2.85579	1.06214	1.02e-07	-2.29612	down
AT5G48290.2	69	75	87	18	13	4	18.3559	18.394	22.4094	4.32739	3.09377	1.06214	1.96e-08	-2.29417	down
AT5G61010.1	80	99	104	14	11	18	21.2821	24.28	26.7882	3.36575	2.61781	4.77965	1.12e-11	-2.29368	down
AT5G39020.1	43	52	47	6	9	6	11.4392	12.7532	12.1062	1.44246	2.14184	1.59322	4.36e-07	-2.29289	down
AT1G55210.1	345	376	404	79	38	59	91.7793	92.2151	104.062	18.9924	9.04334	15.6666	7.13e-27	-2.29208	down
ONT.2268.4	119	128	172	23	22	20	31.6572	31.3924	44.3036	5.52944	5.23562	5.31072	2.32e-15	-2.28786	down
AT5G20640.1	31	28	38	5	5	4	8.24683	6.86708	9.78799	1.20205	1.18991	1.06214	2.96e-05	-2.28584	down
AT3G55310.1	12	14	14	3	1	1	3.19232	3.43354	3.6061	0.721232	0.237983	0.265536	0.00434991	-2.28584	down
AT1G57560.1	22	25	20	1	7	1	5.85259	6.13133	5.15158	0.240411	1.66588	0.265536	0.00109063	-2.28511	down
ONT.14767.3	12	19	16	2	1	3	3.19232	4.65981	4.12126	0.480821	0.237983	0.796608	0.00254488	-2.285	down
AT4G38950.1	15	39	27	2	5	4	3.9904	9.56487	6.95463	0.480821	1.18991	1.06214	0.000456773	-2.2849	down
ONT.14559.2	41	41	40	8	8	2	10.9071	10.0554	10.3032	1.92328	1.90386	0.531072	6.17e-06	-2.28453	down
ONT.15672.3	19	19	21	2	3	3	5.05451	4.65981	5.40915	0.480821	0.713948	0.796608	0.000703964	-2.28301	down
ONT.8610.1	27	40	43	7	6	3	7.18273	9.81012	11.0759	1.68287	1.4279	0.796608	1.87e-05	-2.28295	down
AT2G32160.3	8	19	14	2	3	0	2.12821	4.65981	3.6061	0.480821	0.713948	0	0.0065335	-2.28097	down
AT1G10560.1	21	17	16	0	3	4	5.58656	4.1693	4.12126	0	0.713948	1.06214	0.00208915	-2.28043	down
AT1G67820.1	32	26	39	4	5	5	8.51286	6.37658	10.0456	0.961642	1.18991	1.32768	3.99e-05	-2.27952	down
AT4G33130.3	25	31	17	6	4	0	6.65067	7.60284	4.37884	1.44246	0.95193	0	0.000884456	-2.27903	down
AT2G29440.1	40	59	61	9	8	7	10.6411	14.4699	15.7123	2.1637	1.90386	1.85875	2.7e-07	-2.27768	down
ONT.2120.3	172	197	195	29	30	30	45.7566	48.3148	50.2279	6.97191	7.13948	7.96608	3.74e-24	-2.27547	down
AT3G18950.1	49	76	66	11	10	8	13.0353	18.6392	17.0002	2.64452	2.37983	2.12429	2.12e-08	-2.2749	down
AT3G51440.1	133	141	165	20	30	19	35.3816	34.5807	42.5005	4.80821	7.13948	5.04519	5.83e-17	-2.27423	down
AT3G23240.1	21	15	30	2	3	4	5.58656	3.6788	7.72736	0.480821	0.713948	1.06214	0.000827085	-2.27353	down
AT1G72230.1	92	99	127	9	23	17	24.4745	24.28	32.7125	2.1637	5.4736	4.51411	1.26e-10	-2.27282	down
ONT.8521.3	158	140	202	34	30	15	42.0322	34.3354	52.0309	8.17396	7.13948	3.98304	1.04e-14	-2.27252	down
AT5G61650.1	48	66	70	11	9	8	12.7693	16.1867	18.0305	2.64452	2.14184	2.12429	3.39e-08	-2.27173	down
AT3G14850.2	47	43	45	6	4	10	12.5033	10.5459	11.591	1.44246	0.95193	2.65536	2.42e-06	-2.27171	down
ONT.19022.1	19	17	16	3	2	2	5.05451	4.1693	4.12126	0.721232	0.475965	0.531072	0.00139543	-2.27016	down
ONT.14226.1	43	59	39	5	10	6	11.4392	14.4699	10.0456	1.20205	2.37983	1.59322	1.84e-06	-2.27015	down
ONT.14971.1	37	54	44	6	5	9	9.84299	13.2437	11.3335	1.44246	1.18991	2.38983	2.18e-06	-2.26937	down
AT4G15120.1	15	18	19	3	3	1	3.9904	4.41455	4.894	0.721232	0.713948	0.265536	0.00153795	-2.26879	down
AT4G12870.1	160	173	165	37	30	12	42.5643	42.4288	42.5005	8.89519	7.13948	3.18643	8.1e-16	-2.26806	down
AT2G35930.1	303	290	330	57	51	40	80.6061	71.1234	85.001	13.7034	12.1371	10.6214	4.45e-34	-2.26677	down
AT5G42630.1	20	20	18	4	2	2	5.32054	4.90506	4.63642	0.961642	0.475965	0.531072	0.000867941	-2.26274	down
AT3G21420.1	116	133	142	23	24	15	30.8591	32.6186	36.5762	5.52944	5.71158	3.98304	3.67e-16	-2.26126	down
AT4G35880.1	13	11	15	2	2	1	3.45835	2.69778	3.86368	0.480821	0.475965	0.265536	0.00498947	-2.25633	down
ONT.4360.1	25	32	20	5	5	1	6.65067	7.8481	5.15158	1.20205	1.18991	0.265536	0.000327943	-2.25571	down
AT2G46430.1	39	50	46	8	2	10	10.375	12.2627	11.8486	1.92328	0.475965	2.65536	8.77e-06	-2.25559	down
ONT.8931.2	10	25	12	3	1	2	2.66027	6.13133	3.09095	0.721232	0.237983	0.531072	0.00451343	-2.25461	down
AT5G47990.1	286	320	378	65	55	39	76.0837	78.481	97.3648	15.6267	13.089	10.3559	4.12e-29	-2.25428	down
AT3G46280.1	1415	1491	1656	307	235	202	376.428	365.672	426.551	73.8061	55.9259	53.6383	3.21e-82	-2.2538	down
AT5G14130.1	11	26	23	1	3	4	2.9263	6.37658	5.92431	0.240411	0.713948	1.06214	0.00187709	-2.25261	down
ONT.16191.1	67	90	98	18	14	8	17.8238	22.0728	25.2427	4.32739	3.33176	2.12429	7.63e-10	-2.25212	down
AT3G02910.1	326	374	364	57	57	58	86.7248	91.7246	93.7587	13.7034	13.565	15.4011	3.85e-42	-2.25184	down
ONT.15431.1	29	21	20	4	4	2	7.71478	5.15031	5.15158	0.961642	0.95193	0.531072	0.000413673	-2.25136	down
AT3G16280.1	14	17	21	1	3	3	3.72438	4.1693	5.40915	0.240411	0.713948	0.796608	0.00189223	-2.25117	down
ONT.5516.5	145	163	178	29	26	23	38.5739	39.9762	45.849	6.97191	6.18755	6.10733	5.26e-20	-2.24971	down
AT2G35585.1	82	74	95	7	15	17	21.8142	18.1487	24.47	1.68287	3.56974	4.51411	3.24e-09	-2.24879	down
ONT.15893.3	21	21	29	7	1	2	5.58656	5.15031	7.46979	1.68287	0.237983	0.531072	0.000842946	-2.24867	down
ONT.4293.6	39	64	42	11	7	4	10.375	15.6962	10.8183	2.64452	1.66588	1.06214	3.44e-06	-2.24745	down
ONT.5999.2	8	11	14	1	1	2	2.12821	2.69778	3.6061	0.240411	0.237983	0.531072	0.00958182	-2.24593	down
AT2G44840.1	12	19	28	5	1	2	3.19232	4.65981	7.21221	1.20205	0.237983	0.531072	0.00227222	-2.24529	down
ONT.17734.1	25	30	27	4	4	4	6.65067	7.35759	6.95463	0.961642	0.95193	1.06214	9.8e-05	-2.24483	down
ONT.11492.2	304	294	311	53	53	42	80.8722	72.1044	80.107	12.7418	12.6131	11.1525	5.72e-36	-2.24442	down
AT3G24210.1	14	16	15	3	1	2	3.72438	3.92405	3.86368	0.721232	0.237983	0.531072	0.00299557	-2.24319	down
AT3G45160.1	291	313	319	73	38	39	77.4138	76.7642	82.1676	17.55	9.04334	10.3559	3.92e-25	-2.24307	down
ONT.37.7	41	75	79	9	14	7	10.9071	18.394	20.3487	2.1637	3.33176	1.85875	4.96e-07	-2.24284	down
AT4G20780.1	346	399	384	63	65	56	92.0453	97.8559	98.9103	15.1459	15.4689	14.87	7.35e-45	-2.2427	down
AT1G72125.1	12	16	11	1	2	2	3.19232	3.92405	2.83337	0.240411	0.475965	0.531072	0.00530822	-2.24213	down
AT2G39420.1	243	262	287	47	41	41	64.6445	64.2563	73.9251	11.2993	9.75728	10.887	9.52e-31	-2.23863	down
AT1G63530.1	25	42	40	8	4	4	6.65067	10.3006	10.3032	1.92328	0.95193	1.06214	3.83e-05	-2.23685	down
AT2G35770.1	18	19	26	4	3	2	4.78848	4.65981	6.69705	0.961642	0.713948	0.531072	0.000741732	-2.23268	down
ONT.4286.1	15	19	21	0	7	0	3.9904	4.65981	5.40915	0	1.66588	0	0.00901803	-2.23043	down
AT1G56600.1	21	20	29	2	7	1	5.58656	4.90506	7.46979	0.480821	1.66588	0.265536	0.0010248	-2.22812	down
ONT.13000.1	16	22	8	4	1	1	4.25643	5.39557	2.06063	0.961642	0.237983	0.265536	0.00603332	-2.22737	down
AT1G67760.1	11	13	15	0	3	2	2.9263	3.18829	3.86368	0	0.713948	0.531072	0.00681006	-2.22721	down
AT5G48430.1	288	323	306	55	51	45	76.6157	79.2167	78.8191	13.2226	12.1371	11.9491	1.14e-37	-2.22638	down
ONT.15569.1	46	46	55	11	7	5	12.2372	11.2816	14.1668	2.64452	1.66588	1.32768	9.05e-07	-2.22446	down
AT5G56540.1	454	568	539	84	104	70	120.776	139.304	138.835	20.1945	24.7502	18.5875	1.23e-46	-2.22422	down
AT1G69490.1	155	238	177	45	13	33	41.2342	58.3702	45.5914	10.8185	3.09377	8.76269	5.22e-11	-2.22246	down
AT3G01513.1	19	24	20	5	1	3	5.05451	5.88607	5.15158	1.20205	0.237983	0.796608	0.000880299	-2.22147	down
AT4G18360.1	108	116	126	25	19	13	28.7309	28.4493	32.4549	6.01027	4.52167	3.45197	4.35e-14	-2.2213	down
AT4G21850.1	1096	1118	1049	198	172	174	291.565	274.193	270.2	47.6013	40.933	46.2033	6.31e-114	-2.21839	down
ONT.1962.1	8	20	12	2	0	3	2.12821	4.90506	3.09095	0.480821	0	0.796608	0.009303	-2.21577	down
AT2G36690.1	324	335	394	66	56	53	86.1927	82.1598	101.486	15.8671	13.327	14.0734	3.67e-35	-2.21437	down
ONT.17130.1	20	13	17	3	2	2	5.32054	3.18829	4.37884	0.721232	0.475965	0.531072	0.00234293	-2.21299	down
AT1G45010.1	86	93	98	16	15	14	22.8783	22.8085	25.2427	3.84657	3.56974	3.71751	3.49e-12	-2.21278	down
AT2G42350.1	63	57	69	15	5	10	16.7597	13.9794	17.7729	3.60616	1.18991	2.65536	1.68e-07	-2.2127	down
AT1G20640.1	99	96	100	15	16	17	26.3367	23.5443	25.7579	3.60616	3.80772	4.51411	8.2e-13	-2.21186	down
AT1G12160.1	74	65	67	19	9	5	19.686	15.9414	17.2578	4.5678	2.14184	1.32768	1.79e-07	-2.21161	down
ONT.5655.1	18	14	31	3	3	3	4.78848	3.43354	7.98494	0.721232	0.713948	0.796608	0.00141542	-2.21136	down
ONT.13533.3	15	20	15	3	2	2	3.9904	4.90506	3.86368	0.721232	0.475965	0.531072	0.00210488	-2.21063	down
AT2G24600.3	15	18	12	0	4	2	3.9904	4.41455	3.09095	0	0.95193	0.531072	0.00517487	-2.21012	down
AT1G63420.1	36	17	28	7	3	2	9.57697	4.1693	7.21221	1.68287	0.713948	0.531072	0.000655454	-2.20969	down
AT1G29290.1	67	66	84	15	10	10	17.8238	16.1867	21.6366	3.60616	2.37983	2.65536	4.31e-09	-2.2084	down
AT2G39050.1	129	153	162	31	18	24	34.3175	37.5237	41.7278	7.45273	4.28369	6.37287	1.57e-16	-2.20831	down
AT1G56430.1	12	17	15	3	1	2	3.19232	4.1693	3.86368	0.721232	0.237983	0.531072	0.00387894	-2.2073	down
AT5G24105.1	20	24	18	4	2	3	5.32054	5.88607	4.63642	0.961642	0.475965	0.796608	0.000784137	-2.20703	down
AT4G40010.1	14	9	22	2	4	0	3.72438	2.20728	5.66673	0.480821	0.95193	0	0.00774613	-2.20546	down
ONT.4080.1	173	199	231	35	33	32	46.0226	48.8053	59.5007	8.41437	7.85342	8.49716	7.01e-22	-2.20532	down
AT3G22540.1	15	11	19	1	5	0	3.9904	2.69778	4.894	0.240411	1.18991	0	0.00772746	-2.20306	down
AT3G18830.1	1265	1416	1302	243	220	209	336.524	347.278	335.368	58.4198	52.3562	55.497	1.93e-144	-2.20158	down
AT5G42380.1	31	32	47	7	4	6	8.24683	7.8481	12.1062	1.68287	0.95193	1.59322	3.09e-05	-2.20102	down
AT5G61290.1	59	58	58	6	12	10	15.6956	14.2247	14.9396	1.44246	2.85579	2.65536	9.55e-08	-2.19989	down
ONT.18831.1	14	12	13	1	0	4	3.72438	2.94304	3.34852	0.240411	0	1.06214	0.00891809	-2.19976	down
AT5G60660.1	427	471	468	87	74	69	113.593	115.514	120.547	20.9157	17.6107	18.322	2.19e-51	-2.19918	down
AT4G26910.1	162	154	289	55	13	23	43.0964	37.769	74.4403	13.2226	3.09377	6.10733	0.000564699	-2.19781	down
AT5G49520.1	80	96	98	20	13	12	21.2821	23.5443	25.2427	4.80821	3.09377	3.18643	2.79e-11	-2.19591	down
AT4G23210.3	90	85	104	18	17	11	23.9424	20.8465	26.7882	4.32739	4.0457	2.9209	2.36e-11	-2.19504	down
AT5G54720.1	16	11	18	0	2	4	4.25643	2.69778	4.63642	0	0.475965	1.06214	0.0062761	-2.19411	down
AT2G37580.1	42	39	39	9	7	3	11.1731	9.56487	10.0456	2.1637	1.66588	0.796608	9.58e-06	-2.19258	down
AT5G24810.1	81	90	97	15	13	16	21.5482	22.0728	24.9851	3.60616	3.09377	4.24858	2.13e-11	-2.19243	down
ONT.19351.1	18	17	20	3	3	2	4.78848	4.1693	5.15158	0.721232	0.713948	0.531072	0.00138297	-2.19212	down
AT3G49860.1	68	85	87	23	8	8	18.0898	20.8465	22.4094	5.52944	1.90386	2.12429	7.15e-08	-2.19185	down
AT3G14370.1	163	185	144	30	23	29	43.3624	45.3718	37.0913	7.21232	5.4736	7.70055	5.89e-19	-2.191	down
AT5G56300.1	20	22	19	4	4	1	5.32054	5.39557	4.894	0.961642	0.95193	0.265536	0.000991048	-2.191	down
AT5G26660.1	36	32	23	7	4	3	9.57697	7.8481	5.92431	1.68287	0.95193	0.796608	0.000128184	-2.19046	down
AT3G45290.1	61	67	70	11	7	14	16.2276	16.432	18.0305	2.64452	1.66588	3.71751	2.43e-08	-2.18937	down
AT4G21960.1	11721	13267	12136	2296	2155	1886	3118.1	3253.77	3125.98	551.983	512.852	500.801	0	-2.18842	down
AT5G46900.1	197	302	247	41	48	36	52.4073	74.0664	63.622	9.85684	11.4232	9.5593	7.55e-23	-2.18841	down
AT3G51240.1	34	49	32	9	7	2	9.04491	12.0174	8.24252	2.1637	1.66588	0.531072	4.1e-05	-2.18744	down
ONT.15400.4	27	34	19	2	6	4	7.18273	8.3386	4.894	0.480821	1.4279	1.06214	0.000389233	-2.1858	down
AT5G10990.1	7	16	15	1	2	2	1.86219	3.92405	3.86368	0.240411	0.475965	0.531072	0.00872584	-2.18426	down
AT3G22620.1	382	466	477	77	79	69	101.622	114.288	122.865	18.5116	18.8006	18.322	1.53e-43	-2.18365	down
AT1G19190.1	25	27	21	3	3	5	6.65067	6.62183	5.40915	0.721232	0.713948	1.32768	0.000356766	-2.18189	down
AT4G23130.1	90	101	89	11	14	21	23.9424	24.7706	22.9245	2.64452	3.33176	5.57626	7.96e-11	-2.18153	down
AT1G70720.1	13	13	11	3	1	1	3.45835	3.18829	2.83337	0.721232	0.237983	0.265536	0.00759896	-2.1813	down
AT4G14465.1	235	279	275	45	51	38	62.5163	68.4256	70.8342	10.8185	12.1371	10.0904	6.03e-30	-2.17917	down
AT3G19010.2	455	489	451	107	82	50	121.042	119.929	116.168	25.7239	19.5146	13.2768	6.92e-32	-2.17708	down
ONT.14094.1	24	22	15	2	5	2	6.38464	5.39557	3.86368	0.480821	1.18991	0.531072	0.00136561	-2.17707	down
AT5G46870.1	13	29	26	6	2	2	3.45835	7.11234	6.69705	1.44246	0.475965	0.531072	0.00149064	-2.17655	down
ONT.7239.2	56	82	53	12	8	11	14.8975	20.1107	13.6517	2.88493	1.90386	2.9209	1.01e-07	-2.17639	down
ONT.2471.1	37	31	39	8	6	3	9.84299	7.60284	10.0456	1.92328	1.4279	0.796608	3.19e-05	-2.17607	down
ONT.2977.2	11	23	29	1	4	4	2.9263	5.64082	7.46979	0.240411	0.95193	1.06214	0.00252615	-2.17538	down
AT5G56050.1	19	13	17	1	3	3	5.05451	3.18829	4.37884	0.240411	0.713948	0.796608	0.00317549	-2.17353	down
ONT.14227.4	20	34	19	4	5	2	5.32054	8.3386	4.894	0.961642	1.18991	0.531072	0.000632137	-2.17346	down
AT3G07425.1	12	15	10	2	1	2	3.19232	3.6788	2.57579	0.480821	0.237983	0.531072	0.00764109	-2.17295	down
ONT.13622.1	30	19	23	5	4	2	7.98081	4.65981	5.92431	1.20205	0.95193	0.531072	0.00057242	-2.17251	down
AT4G33880.1	13	23	19	3	2	3	3.45835	5.64082	4.894	0.721232	0.475965	0.796608	0.00189829	-2.17158	down
ONT.7018.1	30	31	34	6	5	4	7.98081	7.60284	8.75768	1.44246	1.18991	1.06214	4.85e-05	-2.17115	down
AT5G16080.1	92	104	108	15	22	14	24.4745	25.5063	27.8185	3.60616	5.23562	3.71751	2.22e-12	-2.17071	down
AT5G67340.1	43	77	64	11	12	7	11.4392	18.8845	16.485	2.64452	2.85579	1.85875	3.58e-07	-2.16956	down
AT5G47100.1	221	198	241	46	39	28	58.7919	48.5601	62.0765	11.0589	9.28132	7.43501	3.38e-22	-2.16882	down
AT3G21770.1	463	568	560	95	87	91	123.17	139.304	144.244	22.839	20.7045	24.1638	1.49e-50	-2.16863	down
AT3G18710.1	35	43	35	6	10	2	9.31094	10.5459	9.01526	1.44246	2.37983	0.531072	4.09e-05	-2.16719	down
AT5G41750.2	24	22	32	4	3	5	6.38464	5.39557	8.24252	0.961642	0.713948	1.32768	0.000314185	-2.16638	down
AT4G04220.1	31	36	40	4	7	6	8.24683	8.82911	10.3032	0.961642	1.66588	1.59322	2.54e-05	-2.16637	down
AT4G37430.1	18	19	17	4	3	1	4.78848	4.65981	4.37884	0.961642	0.713948	0.265536	0.00187503	-2.16546	down
AT1G16410.1	80	98	80	14	12	17	21.2821	24.0348	20.6063	3.36575	2.85579	4.51411	1.15e-10	-2.16454	down
AT1G07620.1	85	106	102	16	13	20	22.6123	25.9968	26.273	3.84657	3.09377	5.31072	1.23e-11	-2.16441	down
AT3G09960.1	18	17	25	4	4	1	4.78848	4.1693	6.43947	0.961642	0.95193	0.265536	0.00150789	-2.16379	down
ONT.9049.2	647	555	536	130	60	107	172.119	136.115	138.062	31.2534	14.279	28.4124	1.1e-21	-2.16307	down
AT4G29150.1	13	16	8	3	1	1	3.45835	3.92405	2.06063	0.721232	0.237983	0.265536	0.00963171	-2.16265	down
ONT.16952.2	333	348	355	66	64	49	88.5869	85.348	91.4405	15.8671	15.2309	13.0113	3.02e-39	-2.16128	down
AT4G14580.1	137	146	144	33	25	15	36.4457	35.8069	37.0913	7.93355	5.94956	3.98304	7.5e-16	-2.16058	down
AT2G16980.2	35	36	36	6	3	8	9.31094	8.82911	9.27284	1.44246	0.713948	2.12429	3.32e-05	-2.15985	down
AT3G48700.1	27	47	39	7	5	6	7.18273	11.5269	10.0456	1.68287	1.18991	1.59322	2.78e-05	-2.15931	down
AT1G05220.1	16	19	19	2	3	3	4.25643	4.65981	4.894	0.480821	0.713948	0.796608	0.00170753	-2.15911	down
AT1G30700.1	163	189	240	39	26	36	43.3624	46.3528	61.8189	9.37601	6.18755	9.5593	4.3e-17	-2.15726	down
AT3G24020.1	157	185	179	25	30	34	41.7662	45.3718	46.1066	6.01027	7.13948	9.02823	7.31e-20	-2.15651	down
AT4G12500.1	3087	3002	3218	702	544	371	821.225	736.25	828.889	168.768	129.462	98.5139	2.38e-22	-2.15617	down
AT5G23240.1	132	168	182	24	26	32	35.1155	41.2025	46.8793	5.76985	6.18755	8.49716	1.79e-16	-2.1555	down
AT5G01820.1	345	377	393	69	66	59	91.7793	92.4604	101.228	16.5883	15.7068	15.6666	2.77e-41	-2.15001	down
AT5G39450.1	40	55	46	5	9	9	10.6411	13.4889	11.8486	1.20205	2.14184	2.38983	2.69e-06	-2.14959	down
AT1G47840.1	122	113	109	25	19	15	32.4553	27.7136	28.0761	6.01027	4.52167	3.98304	1.05e-13	-2.14895	down
AT1G66920.2	131	147	146	25	28	20	34.8495	36.0522	37.6065	6.01027	6.66351	5.31072	2.18e-17	-2.14832	down
AT1G19250.1	17	14	36	2	5	3	4.52246	3.43354	9.27284	0.480821	1.18991	0.796608	0.00243025	-2.14716	down
AT1G55910.1	109	122	142	19	28	17	28.9969	29.9209	36.5762	4.5678	6.66351	4.51411	1.44e-13	-2.14542	down
AT2G46650.1	619	695	682	152	91	106	164.671	170.451	175.669	36.5424	21.6564	28.1468	4.53e-43	-2.14442	down
AT4G18250.1	26	21	30	8	2	2	6.9167	5.15031	7.72736	1.92328	0.475965	0.531072	0.000799208	-2.14431	down
AT3G52550.1	15	10	18	0	4	2	3.9904	2.45253	4.63642	0	0.95193	0.531072	0.0085505	-2.14412	down
ONT.13221.2	44	56	57	6	13	7	11.7052	13.7342	14.682	1.44246	3.09377	1.85875	1.28e-06	-2.14292	down
AT1G79760.1	13	16	19	1	3	3	3.45835	3.92405	4.894	0.240411	0.713948	0.796608	0.00365179	-2.1427	down
ONT.8958.1	39	56	51	5	13	6	10.375	13.7342	13.1365	1.20205	3.09377	1.59322	5.79e-06	-2.14034	down
AT2G18328.1	120	132	113	20	28	15	31.9232	32.3734	29.1064	4.80821	6.66351	3.98304	4.51e-14	-2.13881	down
AT3G22550.1	144	141	175	35	28	17	38.3079	34.5807	45.0763	8.41437	6.66351	4.51411	3.47e-15	-2.13787	down
AT3G63380.1	73	131	97	18	15	18	19.42	32.1281	24.9851	4.32739	3.56974	4.77965	4.38e-10	-2.13628	down
AT2G14620.1	10	15	17	3	3	0	2.66027	3.6788	4.37884	0.721232	0.713948	0	0.00770754	-2.13624	down
AT1G25390.1	125	132	114	27	15	22	33.2534	32.3734	29.364	6.49109	3.56974	5.84179	4.84e-14	-2.1357	down
ONT.7338.1	17	24	18	4	2	3	4.52246	5.88607	4.63642	0.961642	0.475965	0.796608	0.00138249	-2.13549	down
AT5G24660.1	41	39	47	5	10	6	10.9071	9.56487	12.1062	1.20205	2.37983	1.59322	8.26e-06	-2.13338	down
ONT.10754.2	46	40	41	5	11	5	12.2372	9.81012	10.5607	1.20205	2.61781	1.32768	1.1e-05	-2.13327	down
ONT.18840.1	18	12	18	1	2	4	4.78848	2.94304	4.63642	0.240411	0.475965	1.06214	0.00453136	-2.13255	down
AT4G00900.1	11	13	18	1	2	3	2.9263	3.18829	4.63642	0.240411	0.475965	0.796608	0.00646264	-2.13191	down
AT5G24760.1	130	183	159	25	31	26	34.5835	44.8813	40.955	6.01027	7.37746	6.90394	4.15e-17	-2.12985	down
AT2G16890.2	27	37	35	10	3	3	7.18273	9.07436	9.01526	2.40411	0.713948	0.796608	0.000168494	-2.12853	down
AT1G29270.1	17	33	27	2	6	4	4.52246	8.09335	6.95463	0.480821	1.4279	1.06214	0.000700796	-2.12724	down
ONT.9966.2	43	47	38	8	3	10	11.4392	11.5269	9.78799	1.92328	0.713948	2.65536	1.68e-05	-2.12598	down
AT5G14200.1	899	1054	1007	206	159	161	239.158	258.497	259.382	49.5246	37.8392	42.7513	6.86e-82	-2.12497	down
ONT.11896.2	101	77	95	12	18	17	26.8687	18.8845	24.47	2.88493	4.28369	4.51411	4.68e-10	-2.12495	down
AT3G24240.1	17	27	26	6	3	2	4.52246	6.62183	6.69705	1.44246	0.713948	0.531072	0.000861103	-2.12372	down
AT2G37440.1	27	19	18	3	5	2	7.18273	4.65981	4.63642	0.721232	1.18991	0.531072	0.00123629	-2.12356	down
AT1G19320.1	19	22	23	3	3	4	5.05451	5.39557	5.92431	0.721232	0.713948	1.06214	0.000842194	-2.12337	down
ONT.7719.4	32	45	42	6	13	0	8.51286	11.0364	10.8183	1.44246	3.09377	0	0.000804067	-2.12219	down
ONT.14648.1	54	57	54	12	7	9	14.3655	13.9794	13.9093	2.88493	1.66588	2.38983	2.54e-07	-2.12152	down
ONT.1929.2	13	34	19	6	2	2	3.45835	8.3386	4.894	1.44246	0.475965	0.531072	0.00264382	-2.1212	down
AT2G41090.1	771	1064	1023	176	180	153	205.107	260.949	263.503	42.3123	42.8369	40.627	2.71e-57	-2.11729	down
AT3G23090.2	194	219	242	38	41	37	51.6092	53.7104	62.3341	9.1356	9.75728	9.82484	1.03e-23	-2.11507	down
ONT.13579.1	27	25	28	5	5	3	7.18273	6.13133	7.21221	1.20205	1.18991	0.796608	0.000235244	-2.11507	down
AT3G16330.1	69	74	77	15	10	13	18.3559	18.1487	19.8336	3.60616	2.37983	3.45197	2.93e-09	-2.11419	down
AT3G18250.1	1129	1381	1521	291	238	194	300.344	338.694	391.777	69.9595	56.6398	51.514	3.51e-57	-2.11399	down
AT1G60680.1	248	288	303	65	38	46	65.9747	70.6329	78.0464	15.6267	9.04334	12.2147	1.43e-24	-2.11324	down
ONT.6174.1	32	29	32	7	1	7	8.51286	7.11234	8.24252	1.68287	0.237983	1.85875	0.000293906	-2.11126	down
AT1G26410.1	46	39	51	6	11	6	12.2372	9.56487	13.1365	1.44246	2.61781	1.59322	6.5e-06	-2.11002	down
ONT.14165.3	38	34	47	7	9	4	10.109	8.3386	12.1062	1.68287	2.14184	1.06214	2.25e-05	-2.10964	down
AT1G70000.2	75	86	80	19	12	11	19.952	21.0918	20.6063	4.5678	2.85579	2.9209	7.78e-10	-2.10897	down
AT5G17350.1	58	83	101	9	12	20	15.4296	20.356	26.0155	2.1637	2.85579	5.31072	2.82e-07	-2.10834	down
ONT.5420.4	21	19	18	6	1	2	5.58656	4.65981	4.63642	1.44246	0.237983	0.531072	0.00245761	-2.1081	down
AT4G22590.1	64	76	69	10	11	15	17.0257	18.6392	17.7729	2.40411	2.61781	3.98304	1.17e-08	-2.10735	down
AT5G64810.1	17	23	29	5	4	2	4.52246	5.64082	7.46979	1.20205	0.95193	0.531072	0.000935973	-2.10735	down
AT5G02400.1	10	21	16	4	2	1	2.66027	5.15031	4.12126	0.961642	0.475965	0.265536	0.00574433	-2.10675	down
AT1G06000.1	66	68	62	14	14	6	17.5578	16.6772	15.9699	3.36575	3.33176	1.59322	5.5e-08	-2.10662	down
ONT.11168.2	654	730	791	168	120	104	173.982	179.035	203.745	40.389	28.5579	27.6158	8.14e-45	-2.10566	down
AT5G23810.1	20	39	33	5	7	3	5.32054	9.56487	8.5001	1.20205	1.66588	0.796608	0.000265517	-2.10373	down
ONT.222.2	89	124	119	24	12	22	23.6764	30.4114	30.6519	5.76985	2.85579	5.84179	6.07e-11	-2.10288	down
AT1G07520.1	24	35	22	2	7	4	6.38464	8.58386	5.66673	0.480821	1.66588	1.06214	0.000527787	-2.10279	down
ONT.8686.2	15	12	20	2	5	0	3.9904	2.94304	5.15158	0.480821	1.18991	0	0.00781423	-2.10279	down
AT5G12330.4	18	30	21	5	3	3	4.78848	7.35759	5.40915	1.20205	0.713948	0.796608	0.000842194	-2.10218	down
ONT.7165.1	31	41	30	8	5	4	8.24683	10.0554	7.72736	1.92328	1.18991	1.06214	6.05e-05	-2.10153	down
AT4G09750.1	68	110	89	9	19	18	18.0898	26.9778	22.9245	2.1637	4.52167	4.77965	1.4e-08	-2.10135	down
AT5G40510.1	55	71	70	11	12	11	14.6315	17.413	18.0305	2.64452	2.85579	2.9209	2.79e-08	-2.09946	down
ONT.17164.4	53	40	43	5	8	10	14.0994	9.81012	11.0759	1.20205	1.90386	2.65536	8.87e-06	-2.09934	down
ONT.8600.4	25	18	17	0	3	6	6.65067	4.41455	4.37884	0	0.713948	1.59322	0.00442412	-2.09821	down
AT3G25400.1	98	94	80	17	19	12	26.0706	23.0538	20.6063	4.08698	4.52167	3.18643	9.29e-11	-2.09809	down
ONT.6322.2	167	182	193	45	24	28	44.4265	44.636	49.7127	10.8185	5.71158	7.43501	1.39e-17	-2.09669	down
AT2G19690.1	21	21	21	3	2	5	5.58656	5.15031	5.40915	0.721232	0.475965	1.32768	0.00118758	-2.09423	down
AT1G49475.1	13	18	15	2	4	1	3.45835	4.41455	3.86368	0.480821	0.95193	0.265536	0.00497644	-2.0936	down
AT3G05890.1	714	939	985	163	171	144	189.943	230.293	253.715	39.1869	40.695	38.2372	1.36e-51	-2.09282	down
AT1G44130.1	17	17	23	5	2	2	4.52246	4.1693	5.92431	1.20205	0.475965	0.531072	0.00223387	-2.0924	down
ONT.12748.2	103	113	110	27	15	16	27.4008	27.7136	28.3337	6.49109	3.56974	4.24858	2.64e-12	-2.0923	down
AT1G67510.1	8	22	25	4	0	4	2.12821	5.39557	6.43947	0.961642	0	1.06214	0.00926654	-2.0902	down
AT3G05660.1	38	52	44	8	9	6	10.109	12.7532	11.3335	1.92328	2.14184	1.59322	4.35e-06	-2.08879	down
AT4G17215.1	124	156	150	32	21	24	32.9873	38.2595	38.6368	7.69314	4.99763	6.37287	8.92e-16	-2.08867	down
AT5G38100.1	31	25	35	6	2	7	8.24683	6.13133	9.01526	1.44246	0.475965	1.85875	0.000284967	-2.08792	down
ONT.5910.2	86	111	103	19	12	22	22.8783	27.2231	26.5306	4.5678	2.85579	5.84179	8.65e-11	-2.08545	down
ONT.11640.2	107	116	126	19	16	27	28.4649	28.4493	32.4549	4.5678	3.80772	7.16948	2.49e-12	-2.08481	down
AT2G19130.1	50	78	67	15	15	4	13.3013	19.1297	17.2578	3.60616	3.56974	1.06214	1.74e-06	-2.08426	down
AT5G65320.1	16	12	26	0	3	5	4.25643	2.94304	6.69705	0	0.713948	1.32768	0.007819	-2.08392	down
ONT.9615.1	28	29	27	4	5	5	7.44875	7.11234	6.95463	0.961642	1.18991	1.32768	0.000181753	-2.08283	down
AT4G36570.1	28	13	17	1	4	4	7.44875	3.18829	4.37884	0.240411	0.95193	1.06214	0.00406796	-2.08221	down
AT3G47540.1	95	112	111	19	22	16	25.2726	27.4683	28.5912	4.5678	5.23562	4.24858	1.01e-12	-2.08118	down
AT5G54840.1	93	106	97	23	16	14	24.7405	25.9968	24.9851	5.52944	3.80772	3.71751	9.15e-12	-2.08108	down
ONT.5698.1	7	42	38	3	9	1	1.86219	10.3006	9.78799	0.721232	2.14184	0.265536	0.00933859	-2.08073	down
ONT.18834.1	14	11	15	4	1	1	3.72438	2.69778	3.86368	0.961642	0.237983	0.265536	0.00920157	-2.08037	down
ONT.12789.2	41	58	46	13	5	7	10.9071	14.2247	11.8486	3.12534	1.18991	1.85875	7.02e-06	-2.0799	down
ONT.14238.1	20	12	15	1	1	5	5.32054	2.94304	3.86368	0.240411	0.237983	1.32768	0.00799711	-2.07695	down
AT1G26380.1	85	88	111	19	17	15	22.6123	21.5823	28.5912	4.5678	4.0457	3.98304	9.72e-11	-2.0735	down
AT3G09490.1	123	132	146	27	25	21	32.7213	32.3734	37.6065	6.49109	5.94956	5.57626	1.79e-15	-2.06827	down
AT1G53340.1	16	29	17	4	3	3	4.25643	7.11234	4.37884	0.961642	0.713948	0.796608	0.00185202	-2.06455	down
AT4G29030.1	292	410	347	85	58	50	77.6798	100.554	89.3798	20.4349	13.803	13.2768	2.84e-25	-2.06455	down
AT4G23190.1	202	231	209	47	36	35	53.7374	56.6534	53.834	11.2993	8.56737	9.29376	4.26e-24	-2.06396	down
AT1G30040.1	30	44	37	5	6	8	7.98081	10.7911	9.53042	1.20205	1.4279	2.12429	4.17e-05	-2.06367	down
AT4G05590.1	298	374	334	66	54	65	79.276	91.7246	86.0313	15.8671	12.8511	17.2598	1.63e-32	-2.06345	down
AT1G77920.1	447	467	469	96	72	88	118.914	114.533	120.804	23.0794	17.1347	23.3672	1.25e-43	-2.0609	down
ONT.10798.3	28	32	29	2	8	5	7.44875	7.8481	7.46979	0.480821	1.90386	1.32768	0.000289278	-2.0607	down
AT2G37710.1	182	225	219	39	36	40	48.4169	55.1819	56.4098	9.37601	8.56737	10.6214	1.94e-22	-2.05963	down
ONT.10807.2	84	92	78	22	12	12	22.3463	22.5633	20.0911	5.28903	2.85579	3.18643	1.43e-09	-2.05661	down
AT2G44280.1	28	41	42	4	6	9	7.44875	10.0554	10.8183	0.961642	1.4279	2.38983	7.87e-05	-2.05384	down
AT3G29034.1	82	132	122	22	20	19	21.8142	32.3734	31.4246	5.28903	4.75965	5.04519	3.47e-11	-2.0537	down
AT4G10500.1	16	30	27	2	5	5	4.25643	7.35759	6.95463	0.480821	1.18991	1.32768	0.00116998	-2.05233	down
AT4G35380.1	24	29	24	3	6	4	6.38464	7.11234	6.18189	0.721232	1.4279	1.06214	0.000449173	-2.05163	down
ONT.2009.1	19	13	14	1	1	5	5.05451	3.18829	3.6061	0.240411	0.237983	1.32768	0.00857109	-2.05156	down
AT5G48070.1	12	13	20	1	3	3	3.19232	3.18829	5.15158	0.240411	0.713948	0.796608	0.00703638	-2.04914	down
AT1G66800.1	64	71	56	14	18	2	17.0257	17.413	14.4244	3.36575	4.28369	0.531072	2.3e-05	-2.04749	down
AT2G13790.1	187	201	185	36	29	41	49.747	49.2959	47.6521	8.65478	6.90149	10.887	1.93e-20	-2.047	down
AT5G44350.1	11	30	33	3	7	2	2.9263	7.35759	8.5001	0.721232	1.66588	0.531072	0.00332893	-2.04591	down
AT5G25260.1	61	78	76	17	11	11	16.2276	19.1297	19.576	4.08698	2.61781	2.9209	1.81e-08	-2.04495	down
AT3G57640.1	59	66	63	14	10	10	15.6956	16.1867	16.2275	3.36575	2.37983	2.65536	6.28e-08	-2.0449	down
ONT.12849.2	20	23	23	2	5	4	5.32054	5.64082	5.92431	0.480821	1.18991	1.06214	0.00112787	-2.04456	down
ONT.2330.1	35	33	31	12	3	2	9.31094	8.09335	7.98494	2.88493	0.713948	0.531072	0.000608042	-2.04405	down
AT5G54490.1	94	93	102	14	23	16	25.0065	22.8085	26.273	3.36575	5.4736	4.24858	7.07e-11	-2.04393	down
AT2G25000.1	247	285	284	57	40	55	65.7086	69.8971	73.1524	13.7034	9.5193	14.6045	5.29e-26	-2.04298	down
ONT.1535.1	60	67	67	21	8	6	15.9616	16.432	17.2578	5.04862	1.90386	1.59322	2.67e-06	-2.0409	down
AT4G01070.1	534	596	541	105	97	112	142.058	146.171	139.35	25.2431	23.0843	29.74	4.56e-53	-2.03877	down
AT1G51170.1	73	76	75	14	13	14	19.42	18.6392	19.3184	3.36575	3.09377	3.71751	2.76e-09	-2.03659	down
ONT.13709.2	128	137	127	25	29	19	34.0514	33.5997	32.7125	6.01027	6.90149	5.04519	3.69e-15	-2.03649	down
ONT.14755.2	21	20	19	3	3	4	5.58656	4.90506	4.894	0.721232	0.713948	1.06214	0.0016084	-2.03599	down
ONT.5192.1	37	25	35	8	6	3	9.84299	6.13133	9.01526	1.92328	1.4279	0.796608	0.000210475	-2.03572	down
ONT.16302.1	95	130	127	29	16	20	25.2726	31.8829	32.7125	6.97191	3.80772	5.31072	1.36e-11	-2.03525	down
AT1G13340.1	54	49	63	8	13	9	14.3655	12.0174	16.2275	1.92328	3.09377	2.38983	1.07e-06	-2.03491	down
AT4G36220.1	1151	1186	1266	252	221	211	306.197	290.87	326.095	60.5835	52.5941	56.0281	3.61e-99	-2.03286	down
AT4G27070.1	75	65	72	15	14	10	19.952	15.9414	18.5457	3.60616	3.33176	2.65536	1.76e-08	-2.03136	down
AT1G55265.1	216	255	245	52	49	34	57.4618	62.5395	63.1068	12.5014	11.6611	9.02823	7.23e-25	-2.031	down
AT2G34960.1	40	37	41	7	6	8	10.6411	9.07436	10.5607	1.68287	1.4279	2.12429	1.94e-05	-2.03073	down
AT4G30980.1	58	49	53	16	8	5	15.4296	12.0174	13.6517	3.84657	1.90386	1.32768	6.18e-06	-2.03066	down
AT5G38030.1	62	41	75	11	8	13	16.4937	10.0554	19.3184	2.64452	1.90386	3.45197	5.83e-06	-2.03025	down
AT4G23550.1	71	71	77	10	13	17	18.8879	17.413	19.8336	2.40411	3.09377	4.51411	2.12e-08	-2.02918	down
ONT.8105.1	15	21	24	6	3	1	3.9904	5.15031	6.18189	1.44246	0.713948	0.265536	0.00308727	-2.02719	down
AT3G13760.1	9	20	21	2	4	2	2.39424	4.90506	5.40915	0.480821	0.95193	0.531072	0.00658777	-2.02623	down
AT5G39670.1	64	58	63	14	14	6	17.0257	14.2247	16.2275	3.36575	3.33176	1.59322	3.58e-07	-2.02554	down
AT4G05020.1	100	115	111	24	20	17	26.6027	28.2041	28.5912	5.76985	4.75965	4.51411	9.56e-13	-2.02322	down
AT1G67750.1	110	138	135	26	25	21	29.263	33.8449	34.7731	6.25068	5.94956	5.57626	2.4e-14	-2.01917	down
AT1G08340.1	37	39	46	11	6	5	9.84299	9.56487	11.8486	2.64452	1.4279	1.32768	2.84e-05	-2.01836	down
AT3G25610.1	47	52	59	13	10	6	12.5033	12.7532	15.1971	3.12534	2.37983	1.59322	2.05e-06	-2.01526	down
ONT.1302.1	20	15	24	4	4	2	5.32054	3.6788	6.18189	0.961642	0.95193	0.531072	0.0025292	-2.01522	down
AT2G23270.1	17	21	33	2	5	5	4.52246	5.15031	8.5001	0.480821	1.18991	1.32768	0.00183282	-2.01496	down
ONT.5573.1	43	31	43	5	9	7	11.4392	7.60284	11.0759	1.20205	2.14184	1.85875	5.19e-05	-2.01473	down
AT4G23885.1	429	496	524	107	93	78	114.126	121.645	134.971	25.7239	22.1324	20.7118	3.44e-41	-2.01267	down
AT3G47950.1	22	21	18	8	0	2	5.85259	5.15031	4.63642	1.92328	0	0.531072	0.00738909	-2.00988	down
AT5G10520.1	72	89	90	20	14	13	19.1539	21.8275	23.1821	4.80821	3.33176	3.45197	1.59e-09	-2.0098	down
AT1G53070.1	29	43	34	8	7	4	7.71478	10.5459	8.75768	1.92328	1.66588	1.06214	8.11e-05	-2.0097	down
ONT.13912.1	20	36	25	5	3	6	5.32054	8.82911	6.43947	1.20205	0.713948	1.59322	0.000704878	-2.00733	down
ONT.10684.2	18	16	25	3	3	4	4.78848	3.92405	6.43947	0.721232	0.713948	1.06214	0.00251014	-2.00634	down
AT1G51620.1	21	29	33	8	0	6	5.58656	7.11234	8.5001	1.92328	0	1.59322	0.00267243	-2.00598	down
ONT.13628.2	71	54	69	11	11	14	18.8879	13.2437	17.7729	2.64452	2.61781	3.71751	2.62e-07	-2.00465	down
ONT.18157.4	21	25	9	2	4	3	5.58656	6.13133	2.31821	0.480821	0.95193	0.796608	0.00611169	-2.00447	down
AT5G64660.1	114	148	164	27	34	20	30.3271	36.2974	42.2429	6.49109	8.09141	5.31072	3.6e-13	-2.0037	down
AT5G54140.1	63	48	52	13	6	11	16.7597	11.7721	13.3941	3.12534	1.4279	2.9209	3.7e-06	-2.00368	down
AT2G46940.1	11	21	28	6	3	1	2.9263	5.15031	7.21221	1.44246	0.713948	0.265536	0.00578467	-2.00355	down
AT1G47480.1	94	98	109	18	22	17	25.0065	24.0348	28.0761	4.32739	5.23562	4.51411	1.79e-11	-2.00283	down
AT3G07390.1	42	42	81	8	11	11	11.1731	10.3006	20.8639	1.92328	2.61781	2.9209	2.86e-05	-2.00154	down
AT3G58550.1	163	201	228	31	43	39	43.3624	49.2959	58.728	7.45273	10.2332	10.3559	4.19e-17	-1.99969	down
AT1G44800.1	828	923	822	197	150	152	220.27	226.369	211.73	47.3609	35.6974	40.3615	2.43e-70	-1.99935	down
AT4G27900.2	36	44	26	11	5	3	9.57697	10.7911	6.69705	2.64452	1.18991	0.796608	0.000288754	-1.99861	down
AT1G79110.2	27	45	39	6	10	4	7.18273	11.0364	10.0456	1.44246	2.37983	1.06214	0.000118659	-1.99819	down
ONT.16867.2	53	48	45	9	8	10	14.0994	11.7721	11.591	2.1637	1.90386	2.65536	3.25e-06	-1.99511	down
AT5G18470.1	149	154	175	21	32	38	39.638	37.769	45.0763	5.04862	7.61544	10.0904	6.04e-14	-1.99415	down
AT5G24100.1	16	20	12	4	3	1	4.25643	4.90506	3.09095	0.961642	0.713948	0.265536	0.006386	-1.99364	down
AT2G39435.1	16	14	29	6	3	1	4.25643	3.43354	7.46979	1.44246	0.713948	0.265536	0.00578102	-1.99241	down
AT4G34050.1	6568	7365	7563	1561	1387	1256	1747.26	1806.29	1948.07	375.281	330.082	333.513	7e-196	-1.99237	down
AT1G51680.3	949	849	1526	86	264	236	252.459	208.22	393.065	20.6753	62.8274	62.6665	0.000563681	-1.99144	down
ONT.6462.3	44	45	41	1	11	11	11.7052	11.0364	10.5607	0.240411	2.61781	2.9209	0.000351856	-1.99059	down
AT5G58010.1	29	33	33	10	2	5	7.71478	8.09335	8.5001	2.40411	0.475965	1.32768	0.000413849	-1.99054	down
ONT.12781.2	14	14	15	1	2	4	3.72438	3.43354	3.86368	0.240411	0.475965	1.06214	0.0087346	-1.98862	down
AT5G27450.2	100	127	107	22	25	17	26.6027	31.1471	27.5609	5.28903	5.94956	4.51411	2.35e-12	-1.98811	down
AT1G13110.1	1128	1137	1176	245	201	227	300.078	278.853	302.913	58.9006	47.8345	60.2767	9e-86	-1.9875	down
AT2G20650.2	14	36	24	0	5	7	3.72438	8.82911	6.18189	0	1.18991	1.85875	0.0072473	-1.98626	down
AT1G70170.1	34	47	54	11	9	5	9.04491	11.5269	13.9093	2.64452	2.14184	1.32768	2.44e-05	-1.98543	down
AT5G06480.1	33	42	40	4	9	8	8.77889	10.3006	10.3032	0.961642	2.14184	2.12429	5.73e-05	-1.98334	down
AT1G07000.1	222	223	227	46	46	39	59.058	54.6914	58.4704	11.0589	10.9472	10.3559	1.24e-24	-1.98296	down
AT2G31390.1	959	1125	1151	213	214	207	255.12	275.91	296.473	51.2075	50.9283	54.966	6.65e-80	-1.98283	down
ONT.13906.1	21	24	23	3	5	4	5.58656	5.88607	5.92431	0.721232	1.18991	1.06214	0.00108674	-1.98257	down
AT2G34350.1	9	17	23	3	1	4	2.39424	4.1693	5.92431	0.721232	0.237983	1.06214	0.00964975	-1.98098	down
AT5G46050.1	662	726	687	162	129	117	176.11	178.054	176.957	38.9465	30.6997	31.0677	2.43e-61	-1.98044	down
ONT.11051.2	110	94	85	11	23	21	29.263	23.0538	21.8942	2.64452	5.4736	5.57626	6.61e-09	-1.97933	down
AT4G22770.1	33	45	46	8	9	6	8.77889	11.0364	11.8486	1.92328	2.14184	1.59322	2.4e-05	-1.97878	down
AT5G28610.1	54	57	53	11	11	9	14.3655	13.9794	13.6517	2.64452	2.61781	2.38983	6.28e-07	-1.97759	down
AT2G33850.1	113	122	106	31	18	17	30.061	29.9209	27.3034	7.45273	4.28369	4.51411	1.06e-11	-1.97623	down
AT3G26460.1	14	11	17	3	2	2	3.72438	2.69778	4.37884	0.721232	0.475965	0.531072	0.00915153	-1.97608	down
AT1G73620.1	80	112	94	23	18	14	21.2821	27.4683	24.2124	5.52944	4.28369	3.71751	3.73e-10	-1.97584	down
AT2G44300.1	62	74	60	8	20	9	16.4937	18.1487	15.4547	1.92328	4.75965	2.38983	1.24e-06	-1.97565	down
AT2G31230.1	53	52	49	8	11	10	14.0994	12.7532	12.6214	1.92328	2.61781	2.65536	1.85e-06	-1.9748	down
AT2G03200.1	29	37	28	11	3	3	7.71478	9.07436	7.21221	2.64452	0.713948	0.796608	0.000646434	-1.97448	down
AT4G36988.1	1614	1653	1715	380	354	255	429.367	405.403	441.748	91.356	84.2458	67.7117	4.69e-89	-1.9733	down
ONT.4075.1	527	569	595	128	108	98	140.196	139.549	153.259	30.7726	25.7021	26.0225	2.44e-50	-1.97273	down
AT1G28815.1	18	28	17	3	4	4	4.78848	6.86708	4.37884	0.721232	0.95193	1.06214	0.00218119	-1.97142	down
AT5G51640.1	80	93	94	10	21	20	21.2821	22.8085	24.2124	2.40411	4.99763	5.31072	7.98e-09	-1.97081	down
AT1G02360.1	193	212	241	58	39	30	51.3432	51.9936	62.0765	13.9438	9.28132	7.96608	2.02e-17	-1.96996	down
AT1G53380.2	40	45	29	9	4	8	10.6411	11.0364	7.46979	2.1637	0.95193	2.12429	0.000102887	-1.96765	down
AT3G22600.1	661	706	796	167	130	132	175.844	173.149	205.033	40.1486	30.9377	35.0508	1.15e-48	-1.9665	down
AT1G05300.1	352	397	444	88	78	70	93.6415	97.3654	114.365	21.1561	18.5626	18.5875	1.99e-33	-1.96635	down
AT1G11700.1	328	380	383	80	75	61	87.2568	93.1961	98.6527	19.2328	17.8487	16.1977	5.52e-35	-1.96547	down
AT1G05260.1	318	381	361	83	66	61	84.5965	93.4414	92.9859	19.9541	15.7068	16.1977	2.55e-33	-1.96316	down
ONT.8067.2	62	75	57	12	10	15	16.4937	18.394	14.682	2.88493	2.37983	3.98304	2.36e-07	-1.96175	down
AT1G56080.1	68	78	67	11	20	10	18.0898	19.1297	17.2578	2.64452	4.75965	2.65536	1.04e-07	-1.96137	down
ONT.8217.1	12	19	21	3	4	2	3.19232	4.65981	5.40915	0.721232	0.95193	0.531072	0.00514045	-1.96066	down
AT3G19450.1	1144	1204	1235	286	244	187	304.335	295.285	318.11	68.7574	58.0677	49.6553	3.3e-74	-1.96012	down
AT4G22530.1	211	230	240	46	51	38	56.1317	56.4082	61.8189	11.0589	12.1371	10.0904	1.52e-23	-1.9587	down
AT1G71910.1	30	36	27	4	5	8	7.98081	8.82911	6.95463	0.961642	1.18991	2.12429	0.000285962	-1.95846	down
AT3G49370.1	16	21	26	3	2	6	4.25643	5.15031	6.69705	0.721232	0.475965	1.59322	0.00308247	-1.95823	down
AT5G63560.1	52	71	85	18	12	10	13.8334	17.413	21.8942	4.32739	2.85579	2.65536	5.95e-07	-1.95806	down
AT2G31880.1	449	484	464	101	98	80	119.446	118.702	119.517	24.2815	23.3223	21.2429	4.45e-47	-1.95594	down
AT1G08050.1	57	71	84	19	15	7	15.1635	17.413	21.6366	4.5678	3.56974	1.85875	7.18e-07	-1.95563	down
ONT.15278.3	15	17	15	1	3	4	3.9904	4.1693	3.86368	0.240411	0.713948	1.06214	0.00710097	-1.95481	down
AT1G28680.1	420	489	492	94	96	90	111.731	119.929	126.729	22.5986	22.8463	23.8983	4.03e-43	-1.95141	down
AT3G52790.1	68	71	67	17	10	13	18.0898	17.413	17.2578	4.08698	2.37983	3.45197	6.44e-08	-1.9501	down
AT1G25530.1	124	134	155	34	28	20	32.9873	32.8639	39.9247	8.17396	6.66351	5.31072	1.44e-13	-1.94782	down
AT1G14170.1	52	32	38	6	8	9	13.8334	7.8481	9.78799	1.44246	1.90386	2.38983	8.53e-05	-1.9471	down
AT4G15380.1	29	37	35	7	7	5	7.71478	9.07436	9.01526	1.68287	1.66588	1.32768	0.00011258	-1.94606	down
ONT.6395.1	69	57	22	9	5	13	18.3559	13.9794	5.66673	2.1637	1.18991	3.45197	0.000716424	-1.94411	down
ONT.1579.1	800	889	894	166	177	177	212.821	218.03	230.275	39.9082	42.1229	46.9999	3.37e-71	-1.94333	down
AT2G03090.1	64	59	82	17	11	12	17.0257	14.4699	21.1215	4.08698	2.61781	3.18643	3.2e-07	-1.94234	down
AT5G02270.1	266	320	319	72	64	46	70.7631	78.481	82.1676	17.3096	15.2309	12.2147	1.14e-26	-1.9418	down
AT1G67810.1	78	68	74	20	9	14	20.7501	16.6772	19.0608	4.80821	2.14184	3.71751	1.42e-07	-1.94167	down
ONT.7596.1	41	55	40	14	8	4	10.9071	13.4889	10.3032	3.36575	1.90386	1.06214	4.96e-05	-1.94095	down
AT1G18590.1	253	313	327	64	56	59	67.3048	76.7642	84.2283	15.3863	13.327	15.6666	4.63e-26	-1.94083	down
AT2G01880.1	87	112	109	25	22	14	23.1443	27.4683	28.0761	6.01027	5.23562	3.71751	1.32e-10	-1.94068	down
AT3G11340.1	44	44	43	5	14	6	11.7052	10.7911	11.0759	1.20205	3.33176	1.59322	5.16e-05	-1.93875	down
AT2G30750.1	149	140	207	36	32	31	39.638	34.3354	53.3188	8.65478	7.61544	8.23162	2.47e-13	-1.93826	down
AT3G15357.1	86	88	65	18	15	14	22.8783	21.5823	16.7426	4.32739	3.56974	3.71751	1.28e-08	-1.93798	down
AT2G20610.2	136	267	167	36	36	40	36.1797	65.4826	43.0157	8.65478	8.56737	10.6214	1.12e-11	-1.93769	down
AT2G47000.1	132	133	140	27	32	22	35.1155	32.6186	36.061	6.49109	7.61544	5.84179	1.43e-14	-1.93724	down
AT1G50520.1	19	26	21	7	3	2	5.05451	6.37658	5.40915	1.68287	0.713948	0.531072	0.00233636	-1.93714	down
AT2G43850.1	28	31	30	9	0	7	7.44875	7.60284	7.72736	2.1637	0	1.85875	0.00267759	-1.93666	down
AT5G43170.1	302	349	360	72	71	61	80.3401	85.5933	92.7284	17.3096	16.8968	16.1977	3.7e-32	-1.9366	down
AT5G25930.1	39	33	43	7	10	5	10.375	8.09335	11.0759	1.68287	2.37983	1.32768	7.3e-05	-1.93627	down
AT2G43100.1	959	1098	1064	251	189	193	255.12	269.288	274.064	60.3431	44.9787	51.2485	1.26e-71	-1.93562	down
AT2G38710.2	63	52	69	19	9	8	16.7597	12.7532	17.7729	4.5678	2.14184	2.12429	4.1e-06	-1.93375	down
AT1G48500.2	45	38	24	5	6	9	11.9712	9.31961	6.18189	1.20205	1.4279	2.38983	0.000326432	-1.9328	down
AT2G03530.1	40	58	53	7	10	12	10.6411	14.2247	13.6517	1.68287	2.37983	3.18643	9.39e-06	-1.93197	down
AT1G72240.1	35	29	41	6	8	6	9.31094	7.11234	10.5607	1.44246	1.90386	1.59322	0.000135192	-1.93183	down
AT5G37540.1	94	93	75	17	22	13	25.0065	22.8085	19.3184	4.08698	5.23562	3.45197	3.31e-09	-1.93152	down
AT3G26500.1	104	132	139	24	32	19	27.6668	32.3734	35.8035	5.76985	7.61544	5.04519	5.57e-12	-1.93026	down
AT5G02890.1	39	40	40	16	1	5	10.375	9.81012	10.3032	3.84657	0.237983	1.32768	0.00199044	-1.92971	down
AT5G59490.1	35	34	46	8	6	8	9.31094	8.3386	11.8486	1.92328	1.4279	2.12429	7.04e-05	-1.92971	down
AT2G16760.1	16	16	25	2	2	6	4.25643	3.92405	6.43947	0.480821	0.475965	1.59322	0.00596433	-1.92947	down
AT3G61990.1	180	145	191	32	39	33	47.8848	35.5617	49.1976	7.69314	9.28132	8.76269	4.31e-15	-1.92817	down
AT1G08990.1	21	27	23	5	2	6	5.58656	6.62183	5.92431	1.20205	0.475965	1.59322	0.00155009	-1.92697	down
AT3G10930.1	153	137	173	30	28	35	40.7021	33.5997	44.5611	7.21232	6.66351	9.29376	2.72e-14	-1.92682	down
ONT.16307.1	13	14	24	2	4	3	3.45835	3.43354	6.18189	0.480821	0.95193	0.796608	0.007324	-1.92559	down
AT2G40330.1	308	350	329	74	75	52	81.9363	85.8386	84.7434	17.7904	17.8487	13.8079	1.74e-31	-1.92542	down
ONT.10005.2	32	33	37	5	3	11	8.51286	8.09335	9.53042	1.20205	0.713948	2.9209	0.000473501	-1.92475	down
ONT.11168.3	23	30	37	6	8	3	6.11862	7.35759	9.53042	1.44246	1.90386	0.796608	0.00057831	-1.92398	down
AT1G62990.1	75	81	90	25	13	11	19.952	19.8655	23.1821	6.01027	3.09377	2.9209	6.08e-08	-1.92377	down
AT4G00670.1	37	46	46	10	7	8	9.84299	11.2816	11.8486	2.40411	1.66588	2.12429	1.94e-05	-1.9235	down
AT4G31920.1	145	139	146	34	27	26	38.5739	34.0902	37.6065	8.17396	6.42553	6.90394	2.69e-15	-1.92217	down
AT3G18880.1	29	41	26	4	6	8	7.71478	10.0554	6.69705	0.961642	1.4279	2.12429	0.000377018	-1.92214	down
AT3G44400.2	58	53	58	7	12	14	15.4296	12.9984	14.9396	1.68287	2.85579	3.71751	3.03e-06	-1.92148	down
AT2G02990.1	62	90	119	16	13	24	16.4937	22.0728	30.6519	3.84657	3.09377	6.37287	9.38e-07	-1.91846	down
AT2G23170.1	47	41	45	8	10	8	12.5033	10.0554	11.591	1.92328	2.37983	2.12429	1.42e-05	-1.91795	down
AT2G23770.1	29	22	29	3	9	3	7.71478	5.39557	7.46979	0.721232	2.14184	0.796608	0.00145889	-1.91694	down
AT4G17280.1	26	30	33	8	4	5	6.9167	7.35759	8.5001	1.92328	0.95193	1.32768	0.000411201	-1.91189	down
AT5G48175.1	45	54	44	16	9	3	11.9712	13.2437	11.3335	3.84657	2.14184	0.796608	8.87e-05	-1.91142	down
AT3G48080.1	69	77	69	17	12	14	18.3559	18.8845	17.7729	4.08698	2.85579	3.71751	3.37e-08	-1.91141	down
AT5G08170.1	139	145	144	35	21	31	36.9777	35.5617	37.0913	8.41437	4.99763	8.23162	5.14e-14	-1.90936	down
AT1G64700.1	27	31	26	4	8	4	7.18273	7.60284	6.69705	0.961642	1.90386	1.06214	0.00059101	-1.90839	down
AT3G26200.1	50	81	53	18	6	12	13.3013	19.8655	13.6517	4.32739	1.4279	3.18643	1.66e-05	-1.90779	down
AT5G63990.1	118	149	145	36	26	22	31.3912	36.5427	37.3489	8.65478	6.18755	5.84179	2.07e-13	-1.90751	down
AT5G01840.1	44	65	63	19	9	6	11.7052	15.9414	16.2275	4.5678	2.14184	1.59322	2.19e-05	-1.9065	down
AT5G06230.1	23	30	27	6	2	7	6.11862	7.35759	6.95463	1.44246	0.475965	1.85875	0.00111814	-1.90636	down
ONT.17218.3	47	44	56	11	7	11	12.5033	10.7911	14.4244	2.64452	1.66588	2.9209	1.11e-05	-1.90512	down
AT5G42860.1	75	86	86	24	16	10	19.952	21.0918	22.1518	5.76985	3.80772	2.65536	3.04e-08	-1.90376	down
ONT.12367.3	16	16	28	6	2	3	4.25643	3.92405	7.21221	1.44246	0.475965	0.796608	0.00535761	-1.90367	down
AT2G29120.1	70	58	69	10	10	19	18.6219	14.2247	17.7729	2.40411	2.37983	5.04519	2.19e-06	-1.90255	down
AT1G61255.1	38	39	45	7	11	6	10.109	9.56487	11.591	1.68287	2.61781	1.59322	4.61e-05	-1.90215	down
AT1G33960.1	18	19	27	4	5	3	4.78848	4.65981	6.95463	0.961642	1.18991	0.796608	0.00261356	-1.8986	down
AT1G47600.1	158	186	170	35	37	34	42.0322	45.6171	43.7884	8.41437	8.80535	9.02823	3.67e-18	-1.89499	down
AT4G34230.2	683	776	799	211	162	100	181.696	190.316	205.805	50.7266	38.5532	26.5536	1.33e-25	-1.89276	down
AT4G37530.1	616	577	648	150	122	113	163.873	141.511	166.911	36.0616	29.0339	30.0056	2.65e-44	-1.89266	down
ONT.9464.1	21	17	12	4	1	4	5.58656	4.1693	3.09095	0.961642	0.237983	1.06214	0.0091211	-1.89256	down
ONT.7138.2	18	15	16	4	4	1	4.78848	3.6788	4.12126	0.961642	0.95193	0.265536	0.00758275	-1.89197	down
AT1G64360.1	37	48	37	14	5	5	9.84299	11.7721	9.53042	3.36575	1.18991	1.32768	0.000164968	-1.89139	down
ONT.4582.1	43	47	51	14	5	9	11.4392	11.5269	13.1365	3.36575	1.18991	2.38983	3.18e-05	-1.8913	down
AT5G67430.1	51	59	64	17	8	10	13.5674	14.4699	16.485	4.08698	1.90386	2.65536	3.29e-06	-1.89032	down
ONT.15689.2	18	25	17	1	5	5	4.78848	6.13133	4.37884	0.240411	1.18991	1.32768	0.00502057	-1.88851	down
ONT.16068.1	15	20	29	6	3	3	3.9904	4.90506	7.46979	1.44246	0.713948	0.796608	0.00390703	-1.8877	down
AT1G09932.2	20	35	51	13	2	5	5.32054	8.58386	13.1365	3.12534	0.475965	1.32768	0.00346427	-1.88735	down
AT5G16910.1	21	14	15	1	3	5	5.58656	3.43354	3.86368	0.240411	0.713948	1.32768	0.00961936	-1.88594	down
AT1G55320.1	44	41	50	14	6	7	11.7052	10.0554	12.8789	3.36575	1.4279	1.85875	4.51e-05	-1.88482	down
AT5G61010.2	19	21	34	8	2	4	5.05451	5.15031	8.75768	1.92328	0.475965	1.06214	0.00329124	-1.88421	down
AT1G71400.1	63	58	66	13	12	13	16.7597	14.2247	17.0002	3.12534	2.85579	3.45197	3.99e-07	-1.8839	down
AT5G02550.1	72	87	66	17	17	12	19.1539	21.337	17.0002	4.08698	4.0457	3.18643	3.85e-08	-1.88303	down
ONT.7443.6	39	35	41	9	10	4	10.375	8.58386	10.5607	2.1637	2.37983	1.06214	0.000105835	-1.87965	down
AT5G22250.1	139	175	178	29	35	38	36.9777	42.9193	45.849	6.97191	8.32939	10.0904	6.01e-15	-1.87941	down
AT3G43190.1	9	26	48	4	4	7	2.39424	6.37658	12.3638	0.961642	0.95193	1.85875	0.00944231	-1.87936	down
AT1G74030.1	165	158	158	30	31	39	43.8944	38.75	40.6975	7.21232	7.37746	10.3559	1.51e-15	-1.87865	down
AT2G25260.1	92	83	78	15	18	19	24.4745	20.356	20.0911	3.60616	4.28369	5.04519	6.51e-09	-1.87797	down
AT1G20823.1	50	67	62	16	6	14	13.3013	16.432	15.9699	3.84657	1.4279	3.71751	7.12e-06	-1.87791	down
ONT.18415.1	13	17	24	6	2	2	3.45835	4.1693	6.18189	1.44246	0.475965	0.531072	0.00818446	-1.87752	down
AT1G21110.1	283	280	335	68	66	55	75.2856	68.6708	86.2889	16.3479	15.7068	14.6045	2.7e-25	-1.87701	down
AT1G36622.1	72	69	112	22	16	14	19.1539	16.9225	28.8488	5.28903	3.80772	3.71751	3.67e-07	-1.87601	down
AT5G27100.1	16	21	22	8	2	1	4.25643	5.15031	5.66673	1.92328	0.475965	0.265536	0.00821031	-1.87584	down
AT4G10960.1	192	254	192	40	45	48	51.0772	62.2943	49.4551	9.61642	10.7092	12.7457	3.19e-18	-1.87444	down
AT4G13195.1	70	43	69	13	11	13	18.6219	10.5459	17.7729	3.12534	2.61781	3.45197	7.58e-06	-1.87442	down
AT2G33580.1	40	33	34	11	2	8	10.6411	8.09335	8.75768	2.64452	0.475965	2.12429	0.000610559	-1.87273	down
AT5G26260.1	357	412	383	106	72	66	94.9716	101.044	98.6527	25.4835	17.1347	17.5254	1.01e-28	-1.86927	down
AT1G68725.1	30	22	21	4	3	7	7.98081	5.39557	5.40915	0.961642	0.713948	1.85875	0.00214006	-1.86902	down
AT3G04290.1	257	332	275	85	45	52	68.3689	81.424	70.8342	20.4349	10.7092	13.8079	1.48e-17	-1.86729	down
AT2G27660.1	150	186	224	50	37	31	39.904	45.6171	57.6977	12.0205	8.80535	8.23162	8.06e-14	-1.86493	down
AT2G33620.1	15	22	31	3	6	4	3.9904	5.39557	7.98494	0.721232	1.4279	1.06214	0.00364364	-1.86292	down
AT3G19660.1	657	706	795	147	167	146	174.78	173.149	204.775	35.3404	39.7431	38.7683	8.72e-48	-1.86165	down
ONT.13881.1	58	75	80	12	18	14	15.4296	18.394	20.6063	2.88493	4.28369	3.71751	2.65e-07	-1.86056	down
AT1G08290.1	13	16	19	4	3	2	3.45835	3.92405	4.894	0.961642	0.713948	0.531072	0.0083665	-1.86008	down
AT3G23810.1	1038	1099	1049	255	233	195	276.136	269.533	270.2	61.3047	55.4499	51.7795	4.22e-91	-1.85873	down
AT1G22070.1	316	295	374	73	73	64	84.0645	72.3496	96.3345	17.55	17.3727	16.9943	8.04e-25	-1.85851	down
ONT.7800.1	15	21	22	4	2	5	3.9904	5.15031	5.66673	0.961642	0.475965	1.32768	0.00491829	-1.85681	down
AT5G15600.1	100	94	80	18	15	24	26.6027	23.0538	20.6063	4.32739	3.56974	6.37287	1.02e-08	-1.85662	down
AT2G41342.1	18	22	22	6	3	3	4.78848	5.39557	5.66673	1.44246	0.713948	0.796608	0.00322068	-1.85627	down
ONT.842.4	19	18	16	6	1	3	5.05451	4.41455	4.12126	1.44246	0.237983	0.796608	0.00800544	-1.85511	down
AT1G19380.1	283	257	337	57	69	61	75.2856	63.03	86.8041	13.7034	16.4208	16.1977	7.86e-21	-1.8541	down
ONT.18630.1	24	26	35	7	6	4	6.38464	6.37658	9.01526	1.68287	1.4279	1.06214	0.000825597	-1.84944	down
ONT.14233.3	35	29	35	8	5	7	9.31094	7.11234	9.01526	1.92328	1.18991	1.85875	0.000284967	-1.8489	down
ONT.574.3	252	341	305	80	56	56	67.0388	83.6313	78.5615	19.2328	13.327	14.87	3.72e-22	-1.84884	down
AT3G25730.1	91	91	88	17	22	18	24.2084	22.318	22.6669	4.08698	5.23562	4.77965	1.21e-09	-1.84666	down
AT3G62830.1	421	522	520	114	114	87	111.997	128.022	133.941	27.4068	27.13	23.1016	3.82e-36	-1.84648	down
AT1G27030.1	306	331	323	72	62	72	81.4042	81.1787	83.198	17.3096	14.7549	19.1186	9.5e-30	-1.84602	down
ONT.7870.4	27	31	14	4	6	4	7.18273	7.60284	3.6061	0.961642	1.4279	1.06214	0.00323344	-1.84593	down
AT3G22840.1	23	25	32	7	7	2	6.11862	6.13133	8.24252	1.68287	1.66588	0.531072	0.00158703	-1.84294	down
AT3G21700.3	40	45	38	7	6	12	10.6411	11.0364	9.78799	1.68287	1.4279	3.18643	9.28e-05	-1.84133	down
AT5G07770.1	38	37	30	4	6	11	10.109	9.07436	7.72736	0.961642	1.4279	2.9209	0.000455717	-1.84127	down
AT4G32810.1	95	127	135	30	24	22	25.2726	31.1471	34.7731	7.21232	5.71158	5.84179	6.68e-11	-1.83979	down
AT3G06435.1	19	31	35	6	7	4	5.05451	7.60284	9.01526	1.44246	1.66588	1.06214	0.00121181	-1.83878	down
AT2G36970.1	13	19	20	4	4	2	3.45835	4.65981	5.15158	0.961642	0.95193	0.531072	0.00721493	-1.83818	down
ONT.11493.1	27	20	25	4	2	8	7.18273	4.90506	6.43947	0.961642	0.475965	2.12429	0.00346414	-1.83816	down
ONT.9616.3	105	99	123	18	20	31	27.9328	24.28	31.6822	4.32739	4.75965	8.23162	4.86e-09	-1.83719	down
ONT.17675.2	16	21	20	4	2	5	4.25643	5.15031	5.15158	0.961642	0.475965	1.32768	0.00522678	-1.83596	down
AT1G34750.1	159	221	206	52	36	38	42.2983	54.2009	53.0612	12.5014	8.56737	10.0904	8.19e-16	-1.83416	down
AT4G00820.1	71	74	81	15	20	13	18.8879	18.1487	20.8639	3.60616	4.75965	3.45197	5.91e-08	-1.83284	down
AT5G42830.1	37	39	42	17	4	3	9.84299	9.56487	10.8183	4.08698	0.95193	0.796608	0.0016142	-1.83029	down
AT1G16500.1	25	26	28	7	5	4	6.65067	6.37658	7.21221	1.68287	1.18991	1.06214	0.00100245	-1.82983	down
ONT.5734.4	31	30	50	8	14	0	8.24683	7.35759	12.8789	1.92328	3.33176	0	0.00770754	-1.82755	down
AT5G59310.1	18	18	20	6	3	2	4.78848	4.41455	5.15158	1.44246	0.713948	0.531072	0.00579069	-1.8275	down
AT5G15180.1	75	78	78	11	21	17	19.952	19.1297	20.0911	2.64452	4.99763	4.51411	1.14e-07	-1.82738	down
ONT.13915.1	12	18	22	5	2	3	3.19232	4.41455	5.66673	1.20205	0.475965	0.796608	0.00907252	-1.82732	down
ONT.12098.1	40	33	34	13	4	5	10.6411	8.09335	8.75768	3.12534	0.95193	1.32768	0.00058199	-1.82628	down
AT2G45290.1	160	216	185	48	31	42	42.5643	52.9746	47.6521	11.5397	7.37746	11.1525	2.78e-15	-1.82572	down
AT2G22250.3	32	40	35	13	7	2	8.51286	9.81012	9.01526	3.12534	1.66588	0.531072	0.000837253	-1.82427	down
AT1G29980.1	54	53	58	16	12	7	14.3655	12.9984	14.9396	3.84657	2.85579	1.85875	6.76e-06	-1.82314	down
ONT.16022.1	13	24	29	5	6	2	3.45835	5.88607	7.46979	1.20205	1.4279	0.531072	0.00566839	-1.82299	down
AT1G76790.1	294	272	346	77	57	65	78.2119	66.7088	89.1223	18.5116	13.565	17.2598	4.97e-21	-1.82257	down
ONT.2834.2	130	168	131	17	34	40	34.5835	41.2025	33.7428	4.08698	8.09141	10.6214	3.55e-09	-1.82239	down
AT3G13437.1	125	165	180	42	37	23	33.2534	40.4667	46.3642	10.0972	8.80535	6.10733	4.53e-12	-1.82149	down
AT2G45750.1	29	24	35	5	7	6	7.71478	5.88607	9.01526	1.20205	1.66588	1.59322	0.000786397	-1.82013	down
AT1G67330.1	260	290	269	57	64	58	69.167	71.1234	69.2887	13.7034	15.2309	15.4011	2.43e-26	-1.81923	down
AT5G66910.1	59	65	64	17	10	13	15.6956	15.9414	16.485	4.08698	2.37983	3.45197	9.55e-07	-1.81918	down
AT5G47060.1	297	319	350	74	85	53	79.01	78.2357	90.1526	17.7904	20.2285	14.0734	2.28e-24	-1.81889	down
ONT.4061.1	24	23	23	6	2	6	6.38464	5.64082	5.92431	1.44246	0.475965	1.59322	0.00264291	-1.81821	down
AT5G12880.1	76	80	81	21	15	15	20.218	19.6202	20.8639	5.04862	3.56974	3.98304	2.24e-08	-1.81688	down
AT4G14650.1	15	17	19	3	4	3	3.9904	4.1693	4.894	0.721232	0.95193	0.796608	0.00723565	-1.81467	down
AT1G15790.2	133	125	154	33	34	23	35.3816	30.6566	39.6671	7.93355	8.09141	6.10733	1.77e-12	-1.814	down
AT3G10320.1	45	51	46	14	7	9	11.9712	12.5079	11.8486	3.36575	1.66588	2.38983	2.54e-05	-1.81327	down
AT3G55720.1	16	24	30	3	6	5	4.25643	5.88607	7.72736	0.721232	1.4279	1.32768	0.00351754	-1.81008	down
AT5G46350.1	19	23	18	6	3	3	5.05451	5.64082	4.63642	1.44246	0.713948	0.796608	0.00446858	-1.80977	down
AT1G49570.1	60	57	55	16	12	9	15.9616	13.9794	14.1668	3.84657	2.85579	2.38983	3.04e-06	-1.8056	down
ONT.19449.1	30	32	34	6	7	7	7.98081	7.8481	8.75768	1.44246	1.66588	1.85875	0.000339763	-1.80545	down
AT1G60110.1	47	45	58	16	8	8	12.5033	11.0364	14.9396	3.84657	1.90386	2.12429	3.73e-05	-1.80469	down
ONT.1632.2	89	99	75	22	16	19	23.6764	24.28	19.3184	5.28903	3.80772	5.04519	1.09e-08	-1.8046	down
AT3G01720.1	227	271	227	58	53	49	60.3881	66.4636	58.4704	13.9438	12.6131	13.0113	1.2e-22	-1.8038	down
AT2G35120.1	593	748	705	172	147	135	157.754	183.449	181.593	41.3506	34.9834	35.8474	2.97e-46	-1.80366	down
ONT.17477.1	164	225	277	43	57	46	43.6284	55.1819	71.3493	10.3377	13.565	12.2147	5.75e-13	-1.80188	down
ONT.16125.1	27	23	28	3	9	4	7.18273	5.64082	7.21221	0.721232	2.14184	1.06214	0.00220137	-1.80042	down
AT5G22460.1	83	94	84	26	18	13	22.0802	23.0538	21.6366	6.25068	4.28369	3.45197	1.76e-08	-1.8004	down
AT2G26360.1	17	21	17	6	3	2	4.52246	5.15031	4.37884	1.44246	0.713948	0.531072	0.0069728	-1.79908	down
AT5G44400.1	38	62	51	9	11	12	10.109	15.2057	13.1365	2.1637	2.61781	3.18643	2.85e-05	-1.79877	down
ONT.5573.2	13	20	27	6	4	2	3.45835	4.90506	6.95463	1.44246	0.95193	0.531072	0.00763233	-1.79827	down
AT5G11950.1	458	522	491	100	119	108	121.84	128.022	126.471	24.0411	28.3199	28.6779	1.46e-40	-1.79822	down
AT1G66200.1	2337	2581	2568	601	598	477	621.705	632.998	661.462	144.487	142.314	126.661	5.5e-144	-1.7978	down
AT1G66280.1	399	479	429	114	90	87	106.145	117.476	110.501	27.4068	21.4184	23.1016	3.34e-35	-1.79707	down
AT3G26330.1	24	27	22	4	8	3	6.38464	6.62183	5.66673	0.961642	1.90386	0.796608	0.00234795	-1.79588	down
AT1G22410.1	1286	1467	1491	359	288	303	342.111	359.786	384.05	86.3074	68.539	80.4574	1.28e-77	-1.79356	down
AT4G24570.1	273	278	395	52	86	71	72.6253	68.1803	101.744	12.5014	20.4665	18.8531	6.18e-14	-1.79336	down
AT1G24020.1	807	870	770	218	182	149	214.684	213.37	198.336	52.4095	43.3128	39.5649	3.16e-55	-1.79257	down
AT1G19020.1	908	980	1013	214	231	205	241.552	240.348	260.927	51.4479	54.974	54.4349	1.57e-73	-1.79237	down
AT4G21230.1	40	62	53	10	9	14	10.6411	15.2057	13.6517	2.40411	2.14184	3.71751	2.76e-05	-1.79117	down
AT5G63590.1	115	123	131	34	30	18	30.5931	30.1661	33.7428	8.17396	7.13948	4.77965	3.19e-11	-1.78803	down
AT1G14360.1	85	116	94	25	27	13	22.6123	28.4493	24.2124	6.01027	6.42553	3.45197	1.27e-08	-1.78799	down
ONT.5240.1	38	42	65	12	8	11	10.109	10.3006	16.7426	2.88493	1.90386	2.9209	9.88e-05	-1.78708	down
AT4G23010.1	955	1007	1046	258	222	198	254.056	246.97	269.427	62.0259	52.8321	52.5762	8.26e-72	-1.78635	down
ONT.4203.1	38	47	59	13	9	9	10.109	11.5269	15.1971	3.12534	2.14184	2.38983	4.62e-05	-1.78606	down
ONT.9094.2	21	27	21	5	2	7	5.58656	6.62183	5.40915	1.20205	0.475965	1.85875	0.00377119	-1.78588	down
AT3G57010.1	78	87	80	20	19	15	20.7501	21.337	20.6063	4.80821	4.52167	3.98304	1.29e-08	-1.78498	down
AT1G68430.1	20	28	25	10	3	2	5.32054	6.86708	6.43947	2.40411	0.713948	0.531072	0.00513746	-1.78354	down
ONT.7386.1	34	40	52	12	7	8	9.04491	9.81012	13.3941	2.88493	1.66588	2.12429	0.000140716	-1.78351	down
AT2G14560.2	109	129	126	33	24	24	28.9969	31.6376	32.4549	7.93355	5.71158	6.37287	9.89e-12	-1.78132	down
AT2G24570.1	271	317	257	91	59	40	72.0933	77.7452	66.1978	21.8774	14.041	10.6214	7.16e-15	-1.78087	down
AT1G10460.1	18	20	16	4	4	3	4.78848	4.90506	4.12126	0.961642	0.95193	0.796608	0.00659394	-1.77651	down
AT1G76990.3	265	282	298	54	70	66	70.4971	69.1613	76.7585	12.9822	16.6588	17.5254	6.11e-23	-1.77644	down
AT3G09830.1	212	225	243	50	52	51	56.3977	55.1819	62.5916	12.0205	12.3751	13.5423	1.23e-20	-1.77579	down
ONT.14239.1	26	18	15	7	2	3	6.9167	4.41455	3.86368	1.68287	0.475965	0.796608	0.00917986	-1.77517	down
AT3G02300.1	63	81	65	14	17	15	16.7597	19.8655	16.7426	3.36575	4.0457	3.98304	3.37e-07	-1.77377	down
AT4G02330.1	232	219	208	53	59	37	61.7182	53.7104	53.5764	12.7418	14.041	9.82484	1.68e-18	-1.77338	down
AT2G33770.1	464	549	510	115	121	109	123.436	134.644	131.365	27.6472	28.7959	28.9434	1.19e-42	-1.77248	down
AT5G58700.1	104	92	71	19	17	23	27.6668	22.5633	18.2881	4.5678	4.0457	6.10733	9.7e-08	-1.77183	down
AT1G14040.1	25	32	32	8	7	4	6.65067	7.8481	8.24252	1.92328	1.66588	1.06214	0.000828225	-1.76944	down
AT4G16140.1	95	108	96	25	23	19	25.2726	26.4873	24.7276	6.01027	5.4736	5.04519	3.73e-10	-1.76768	down
ONT.5607.2	46	45	26	9	6	10	12.2372	11.0364	6.69705	2.1637	1.4279	2.65536	0.000440906	-1.76721	down
AT3G44260.1	363	401	451	96	78	101	96.5677	98.3465	116.168	23.0794	18.5626	26.8191	3.07e-25	-1.76695	down
AT1G05710.2	56	49	58	13	13	10	14.8975	12.0174	14.9396	3.12534	3.09377	2.65536	7.22e-06	-1.76617	down
AT4G23420.1	37	31	38	10	8	5	9.84299	7.60284	9.78799	2.40411	1.90386	1.32768	0.000329534	-1.76551	down
AT2G39380.1	90	101	94	26	21	17	23.9424	24.7706	24.2124	6.25068	4.99763	4.51411	1.55e-09	-1.76434	down
AT3G15210.1	394	440	502	110	112	83	104.815	107.911	129.305	26.4452	26.654	22.0395	7.03e-29	-1.76363	down
AT1G19180.1	388	454	443	106	97	90	103.218	111.345	114.107	25.4835	23.0843	23.8983	4.47e-36	-1.7632	down
ONT.8063.1	67	66	74	12	17	17	17.8238	16.1867	19.0608	2.88493	4.0457	4.51411	6.35e-07	-1.76029	down
AT5G44070.1	556	594	604	148	139	115	147.911	145.68	155.578	35.5808	33.0796	30.5367	1.22e-47	-1.76027	down
ONT.18483.2	1160	1087	890	210	272	236	308.591	266.59	229.245	50.4862	64.7312	62.6665	4.39e-37	-1.75648	down
AT5G58390.1	21	26	20	8	2	4	5.58656	6.37658	5.15158	1.92328	0.475965	1.06214	0.00508418	-1.75634	down
AT1G19900.1	23	35	24	11	1	5	6.11862	8.58386	6.18189	2.64452	0.237983	1.32768	0.00670595	-1.75616	down
AT2G35750.1	27	22	32	7	10	0	7.18273	5.39557	8.24252	1.68287	2.37983	0	0.00991963	-1.75385	down
AT2G44370.1	202	233	260	60	53	46	53.7374	57.144	66.9705	14.4246	12.6131	12.2147	8.84e-19	-1.75354	down
AT1G12420.1	65	77	63	17	18	11	17.2917	18.8845	16.2275	4.08698	4.28369	2.9209	6.1e-07	-1.75227	down
AT4G24140.1	61	72	72	18	15	13	16.2276	17.6582	18.5457	4.32739	3.56974	3.45197	4.36e-07	-1.75218	down
ONT.9531.3	33	28	27	5	9	5	8.77889	6.86708	6.95463	1.20205	2.14184	1.32768	0.00106879	-1.75171	down
AT4G11850.1	198	215	200	43	48	49	52.6733	52.7294	51.5158	10.3377	11.4232	13.0113	5.51e-19	-1.75154	down
AT2G43840.1	29	18	28	8	4	4	7.71478	4.41455	7.21221	1.92328	0.95193	1.06214	0.00346841	-1.75127	down
ONT.18178.3	30	30	33	9	3	8	7.98081	7.35759	8.5001	2.1637	0.713948	2.12429	0.00108405	-1.75061	down
AT5G42180.1	134	159	173	43	27	36	35.6476	38.9952	44.5611	10.3377	6.42553	9.5593	1.89e-12	-1.7504	down
AT5G66870.1	22	25	28	4	8	4	5.85259	6.13133	7.21221	0.961642	1.90386	1.06214	0.00241718	-1.75037	down
AT2G44450.1	45	59	63	11	12	14	11.9712	14.4699	16.2275	2.64452	2.85579	3.71751	1.11e-05	-1.74997	down
AT1G13480.1	29	26	20	9	4	3	7.71478	6.37658	5.15158	2.1637	0.95193	0.796608	0.00346467	-1.74969	down
AT5G11260.1	186	230	246	57	52	43	49.481	56.4082	63.3644	13.7034	12.3751	11.4181	1.25e-17	-1.74694	down
ONT.12949.1	55	51	42	12	13	8	14.6315	12.5079	10.8183	2.88493	3.09377	2.12429	2.95e-05	-1.74633	down
AT5G19875.1	96	97	94	23	17	25	25.5386	23.7895	24.2124	5.52944	4.0457	6.6384	4.14e-09	-1.74547	down
ONT.525.1	244	285	295	79	60	51	64.9106	69.8971	75.9857	18.9924	14.279	13.5423	7.54e-21	-1.74538	down
AT5G36220.1	38	63	71	11	13	14	10.109	15.4509	18.2881	2.64452	3.09377	3.71751	4.21e-05	-1.74426	down
AT5G48010.2	73	86	97	31	19	8	19.42	21.0918	24.9851	7.45273	4.52167	2.12429	9.55e-06	-1.74276	down
AT1G51700.1	205	269	239	52	64	48	54.5355	65.9731	61.5613	12.5014	15.2309	12.7457	3.4e-19	-1.74271	down
AT4G11910.1	89	79	87	31	16	11	23.6764	19.375	22.4094	7.45273	3.80772	2.9209	1.71e-06	-1.74221	down
AT2G28960.1	23	33	19	6	5	5	6.11862	8.09335	4.894	1.44246	1.18991	1.32768	0.00270036	-1.74167	down
AT5G02490.1	61	78	61	25	10	10	16.2276	19.1297	15.7123	6.01027	2.37983	2.65536	2.04e-05	-1.73784	down
AT3G57540.1	26	36	28	9	1	9	6.9167	8.82911	7.21221	2.1637	0.237983	2.38983	0.0042871	-1.73714	down
AT5G23850.1	62	69	56	17	9	16	16.4937	16.9225	14.4244	4.08698	2.14184	4.24858	5.21e-06	-1.73658	down
ONT.2011.7	48	67	58	14	15	10	12.7693	16.432	14.9396	3.36575	3.56974	2.65536	6.71e-06	-1.735	down
AT1G65860.1	88	110	100	26	17	25	23.4104	26.9778	25.7579	6.25068	4.0457	6.6384	4.86e-09	-1.7336	down
AT5G53760.1	49	61	46	10	13	12	13.0353	14.9604	11.8486	2.40411	3.09377	3.18643	1.73e-05	-1.73189	down
AT3G59700.1	69	63	54	18	9	15	18.3559	15.4509	13.9093	4.32739	2.14184	3.98304	8.39e-06	-1.73133	down
AT1G23410.1	112	102	98	31	24	17	29.795	25.0158	25.2427	7.45273	5.71158	4.51411	2.53e-09	-1.73095	down
AT1G76980.2	109	120	111	19	30	29	28.9969	29.4304	28.5912	4.5678	7.13948	7.70055	4.88e-10	-1.72913	down
ONT.4810.1	88	103	106	17	27	24	23.4104	25.2611	27.3034	4.08698	6.42553	6.37287	7.25e-09	-1.72891	down
AT3G57380.1	40	38	60	12	12	7	10.6411	9.31961	15.4547	2.88493	2.85579	1.85875	0.000162139	-1.7288	down
AT3G47200.2	19	17	25	3	6	4	5.05451	4.1693	6.43947	0.721232	1.4279	1.06214	0.00659723	-1.72777	down
AT5G64900.1	39	39	34	8	12	5	10.375	9.56487	8.75768	1.92328	2.85579	1.32768	0.000324035	-1.72741	down
AT1G07890.6	43	50	19	4	10	10	11.4392	12.2627	4.894	0.961642	2.37983	2.65536	0.00296852	-1.7259	down
AT2G13800.1	53	51	51	8	15	12	14.0994	12.5079	13.1365	1.92328	3.56974	3.18643	2.57e-05	-1.72444	down
ONT.17945.2	24	19	26	7	6	2	6.38464	4.65981	6.69705	1.68287	1.4279	0.531072	0.0048467	-1.7242	down
AT3G59140.1	18	30	26	7	4	5	4.78848	7.35759	6.69705	1.68287	0.95193	1.32768	0.00316741	-1.72399	down
AT5G67140.1	51	52	53	6	14	15	13.5674	12.7532	13.6517	1.44246	3.33176	3.98304	6.53e-05	-1.72054	down
ONT.3115.2	27	40	32	8	8	6	7.18273	9.81012	8.24252	1.92328	1.90386	1.59322	0.000583235	-1.71924	down
AT1G31885.1	51	35	64	11	15	8	13.5674	8.58386	16.485	2.64452	3.56974	2.12429	0.000191977	-1.71846	down
AT3G50910.1	137	140	138	36	32	29	36.4457	34.3354	35.5459	8.65478	7.61544	7.70055	2.6e-13	-1.71706	down
AT5G36710.1	65	88	77	21	17	15	17.2917	21.5823	19.8336	5.04862	4.0457	3.98304	2.16e-07	-1.71652	down
ONT.15385.3	160	209	140	34	38	46	42.5643	51.2579	36.061	8.17396	9.04334	12.2147	9.15e-12	-1.7135	down
AT4G37850.1	55	45	57	16	11	9	14.6315	11.0364	14.682	3.84657	2.61781	2.38983	3.17e-05	-1.71304	down
AT3G47780.1	32	28	43	7	7	9	8.51286	6.86708	11.0759	1.68287	1.66588	2.38983	0.000737914	-1.71124	down
ONT.4129.2	42	72	50	11	11	15	11.1731	17.6582	12.8789	2.64452	2.61781	3.98304	5.03e-05	-1.71071	down
AT5G25440.1	163	195	218	42	45	48	43.3624	47.8243	56.1522	10.0972	10.7092	12.7457	8.1e-15	-1.71022	down
AT1G72520.1	32	43	24	9	6	7	8.51286	10.5459	6.18189	2.1637	1.4279	1.85875	0.000998006	-1.70989	down
AT5G25820.1	114	118	126	42	23	19	30.3271	28.9399	32.4549	10.0972	5.4736	5.04519	7.14e-09	-1.70835	down
AT3G23200.1	50	62	66	20	15	6	13.3013	15.2057	17.0002	4.80821	3.56974	1.59322	4.72e-05	-1.7082	down
AT1G72730.1	33	44	34	7	12	6	8.77889	10.7911	8.75768	1.68287	2.85579	1.59322	0.000411303	-1.70808	down
ONT.14238.2	20	32	34	5	8	6	5.32054	7.8481	8.75768	1.20205	1.90386	1.59322	0.00198472	-1.7069	down
AT1G73805.1	22	52	56	10	13	6	5.85259	12.7532	14.4244	2.40411	3.09377	1.59322	0.00135359	-1.70651	down
AT2G18230.1	88	90	92	17	25	21	23.4104	22.0728	23.6973	4.08698	5.94956	5.57626	1.73e-08	-1.70433	down
AT1G04010.1	17	24	19	6	3	4	4.52246	5.88607	4.894	1.44246	0.713948	1.06214	0.00686548	-1.70411	down
AT5G48370.2	59	51	71	19	14	9	15.6956	12.5079	18.2881	4.5678	3.33176	2.38983	1.93e-05	-1.70282	down
ONT.6126.4	70	77	80	17	20	16	18.6219	18.8845	20.6063	4.08698	4.75965	4.24858	1.66e-07	-1.70043	down
AT3G20100.1	258	266	234	56	66	58	68.6349	65.2373	60.2734	13.463	15.7068	15.4011	2.02e-21	-1.69992	down
AT1G41830.1	177	181	154	37	41	43	47.0868	44.3908	39.6671	8.89519	9.75728	11.4181	9.55e-15	-1.69912	down
AT3G02230.1	945	1065	999	274	261	187	251.395	261.194	257.321	65.8725	62.1134	49.6553	7.63e-58	-1.69742	down
AT1G61260.1	44	51	65	12	16	9	11.7052	12.5079	16.7426	2.88493	3.80772	2.38983	4.42e-05	-1.69632	down
AT2G22500.1	247	276	261	63	63	61	65.7086	67.6898	67.2281	15.1459	14.9929	16.1977	2.43e-23	-1.69426	down
AT3G09020.1	59	66	76	15	18	14	15.6956	16.1867	19.576	3.60616	4.28369	3.71751	1.67e-06	-1.69258	down
AT1G10690.1	26	35	28	12	5	3	6.9167	8.58386	7.21221	2.88493	1.18991	0.796608	0.00286701	-1.69216	down
AT2G03810.2	25	32	24	3	8	7	6.65067	7.8481	6.18189	0.721232	1.90386	1.85875	0.00276345	-1.68966	down
ONT.10790.2	35	62	70	19	17	2	9.31094	15.2057	18.0305	4.5678	4.0457	0.531072	0.00326927	-1.68692	down
ONT.9055.1	128	185	181	16	40	57	34.0514	45.3718	46.6218	3.84657	9.5193	15.1356	1.17e-05	-1.68688	down
AT1G22180.2	146	171	189	41	46	34	38.8399	41.9383	48.6824	9.85684	10.9472	9.02823	9.13e-14	-1.686	down
AT2G20900.2	63	87	92	18	23	16	16.7597	21.337	23.6973	4.32739	5.4736	4.24858	5.15e-07	-1.685	down
AT1G76970.1	45	46	59	13	13	9	11.9712	11.2816	15.1971	3.12534	3.09377	2.38983	4.59e-05	-1.68497	down
AT2G24390.3	116	131	102	39	22	22	30.8591	32.1281	26.273	9.37601	5.23562	5.84179	4.49e-09	-1.68478	down
AT1G66480.1	57	51	46	18	11	7	15.1635	12.5079	11.8486	4.32739	2.61781	1.85875	8.04e-05	-1.68442	down
AT2G44480.1	59	53	75	18	15	11	15.6956	12.9984	19.3184	4.32739	3.56974	2.9209	1.12e-05	-1.68398	down
AT5G51190.1	491	476	623	126	142	116	130.619	116.74	160.472	30.2917	33.7935	30.8022	1.88e-25	-1.68221	down
AT4G01450.2	107	112	114	21	27	31	28.4649	27.4683	29.364	5.04862	6.42553	8.23162	1.11e-09	-1.68199	down
AT3G26590.1	34	33	37	10	9	5	9.04491	8.09335	9.53042	2.40411	2.14184	1.32768	0.000539	-1.68197	down
ONT.4146.2	22	14	27	6	5	3	5.85259	3.43354	6.95463	1.44246	1.18991	0.796608	0.00901144	-1.68111	down
AT5G16600.1	60	72	51	20	14	9	15.9616	17.6582	13.1365	4.80821	3.33176	2.38983	1.71e-05	-1.68103	down
ONT.16463.1	76	101	85	31	15	16	20.218	24.7706	21.8942	7.45273	3.56974	4.24858	7.48e-07	-1.68064	down
AT4G33120.1	162	158	159	33	51	31	43.0964	38.75	40.955	7.93355	12.1371	8.23162	1.45e-12	-1.68017	down
AT1G06090.1	44	56	54	19	11	6	11.7052	13.7342	13.9093	4.5678	2.61781	1.59322	0.000133582	-1.68012	down
AT3G55130.1	42	71	74	9	15	19	11.1731	17.413	19.0608	2.1637	3.56974	5.04519	0.000101642	-1.67926	down
AT2G01660.1	77	85	87	29	13	17	20.4841	20.8465	22.4094	6.97191	3.09377	4.51411	8.65e-07	-1.67925	down
AT1G53920.1	126	120	117	43	23	21	33.5194	29.4304	30.1367	10.3377	5.4736	5.57626	6.68e-09	-1.67873	down
AT1G53310.2	673	734	767	213	164	151	179.036	180.016	197.563	51.2075	39.0291	40.096	2.42e-41	-1.67765	down
AT2G22880.1	18	19	26	3	7	4	4.78848	4.65981	6.69705	0.721232	1.66588	1.06214	0.00778245	-1.67539	down
AT3G45710.1	100	97	75	25	22	18	26.6027	23.7895	19.3184	6.01027	5.23562	4.77965	5.57e-08	-1.67352	down
AT5G41400.1	212	238	216	55	54	52	56.3977	58.3702	55.637	13.2226	12.8511	13.8079	7.19e-20	-1.67342	down
ONT.15568.1	49	42	45	15	10	7	13.0353	10.3006	11.591	3.60616	2.37983	1.85875	0.000130146	-1.67137	down
AT5G53486.1	32	54	45	7	9	14	8.51286	13.2437	11.591	1.68287	2.14184	3.71751	0.000435924	-1.67136	down
AT4G22810.1	32	29	31	13	3	5	8.51286	7.11234	7.98494	3.12534	0.713948	1.32768	0.00337676	-1.67126	down
AT2G29070.2	104	134	136	27	34	29	27.6668	32.8639	35.0307	6.49109	8.09141	7.70055	1.84e-10	-1.66685	down
AT4G12050.1	27	27	21	5	10	2	7.18273	6.62183	5.40915	1.20205	2.37983	0.531072	0.00617056	-1.66658	down
AT4G09030.1	1254	1321	1341	368	307	285	333.598	323.979	345.413	88.4711	73.0606	75.6778	1.93e-80	-1.66595	down
AT5G42590.1	82	86	94	22	23	18	21.8142	21.0918	24.2124	5.28903	5.4736	4.77965	3.02e-08	-1.66579	down
ONT.18411.3	349	434	402	104	98	87	92.8434	106.44	103.547	25.0027	23.3223	23.1016	7.76e-30	-1.66542	down
AT5G46520.1	36	44	42	7	6	15	9.57697	10.7911	10.8183	1.68287	1.4279	3.98304	0.000702091	-1.66345	down
ONT.6501.4	120	150	144	44	23	33	31.9232	36.788	37.0913	10.5781	5.4736	8.76269	4.94e-10	-1.66164	down
AT4G04745.1	74	82	103	18	21	23	19.686	20.1107	26.5306	4.32739	4.99763	6.10733	3.07e-07	-1.66158	down
ONT.9691.1	50	43	43	8	12	12	13.3013	10.5459	11.0759	1.92328	2.85579	3.18643	0.000116492	-1.66125	down
AT1G30840.1	61	89	71	12	16	24	16.2276	21.8275	18.2881	2.88493	3.80772	6.37287	9.99e-06	-1.66116	down
AT3G05270.2	28	25	34	5	7	8	7.44875	6.13133	8.75768	1.20205	1.66588	2.12429	0.00190585	-1.66104	down
ONT.7009.1	65	56	79	19	18	11	17.2917	13.7342	20.3487	4.5678	4.28369	2.9209	8.65e-06	-1.6605	down
AT3G55230.1	151	187	167	42	47	34	40.1701	45.8623	43.0157	10.0972	11.1852	9.02823	2.12e-14	-1.65963	down
AT5G63850.1	270	398	378	92	84	79	71.8273	97.6107	97.3648	22.1178	19.9905	20.9774	1.74e-19	-1.65939	down
AT5G07770.2	29	32	38	7	7	9	7.71478	7.8481	9.78799	1.68287	1.66588	2.38983	0.000843856	-1.65784	down
AT3G13060.2	257	292	280	63	38	97	68.3689	71.6139	72.1221	15.1459	9.04334	25.757	1.56e-08	-1.65395	down
AT4G39800.1	260	320	283	75	59	77	69.167	78.481	72.8948	18.0308	14.041	20.4463	2.87e-20	-1.65357	down
ONT.1520.1	183	144	273	59	26	59	48.6829	35.3164	70.319	14.1842	6.18755	15.6666	2.92e-06	-1.65297	down
AT1G69730.1	47	48	36	15	13	3	12.5033	11.7721	9.27284	3.60616	3.09377	0.796608	0.000966897	-1.6521	down
AT4G10380.1	31	33	34	7	10	6	8.24683	8.09335	8.75768	1.68287	2.37983	1.59322	0.000805332	-1.65164	down
AT1G78020.1	327	351	336	93	81	76	86.9908	86.0838	86.5465	22.3582	19.2766	20.1807	3.13e-28	-1.65114	down
ONT.3742.1	91	95	85	27	27	12	24.2084	23.299	21.8942	6.49109	6.42553	3.18643	2.58e-07	-1.65087	down
AT4G26270.1	38	54	52	13	7	14	10.109	13.2437	13.3941	3.12534	1.66588	3.71751	0.000177488	-1.64783	down
ONT.12037.2	73	118	89	16	23	28	19.42	28.9399	22.9245	3.84657	5.4736	7.43501	1.33e-06	-1.64679	down
AT2G17500.2	121	149	118	35	32	28	32.1892	36.5427	30.3943	8.41437	7.61544	7.43501	2.68e-11	-1.64625	down
AT2G42850.1	48	56	35	13	16	4	12.7693	13.7342	9.01526	3.12534	3.80772	1.06214	0.000743814	-1.64622	down
AT2G41230.1	215	251	283	80	57	48	57.1958	61.5585	72.8948	19.2328	13.565	12.7457	3.54e-15	-1.646	down
ONT.6997.3	47	40	62	2	23	9	12.5033	9.81012	15.9699	0.480821	5.4736	2.38983	0.00849726	-1.64571	down
AT1G06640.1	1780	1744	1861	483	434	422	473.528	427.721	479.354	116.118	103.284	112.056	1.08e-95	-1.64539	down
AT2G37460.1	34	76	43	15	11	10	9.04491	18.6392	11.0759	3.60616	2.61781	2.65536	0.000436689	-1.64538	down
AT4G35630.1	773	746	774	207	193	170	205.639	182.959	199.366	49.765	45.9306	45.1411	6.59e-53	-1.6451	down
AT1G14070.1	99	117	112	23	28	29	26.3367	28.6946	28.8488	5.52944	6.66351	7.70055	1.21e-09	-1.64435	down
AT3G54600.1	161	185	178	44	40	45	42.8303	45.3718	45.849	10.5781	9.5193	11.9491	4.55e-15	-1.64246	down
AT1G56150.1	71	80	104	18	25	19	18.8879	19.6202	26.7882	4.32739	5.94956	5.04519	7.76e-07	-1.64222	down
ONT.4339.2	14	24	24	4	4	6	3.72438	5.88607	6.18189	0.961642	0.95193	1.59322	0.00957316	-1.64105	down
AT1G52880.1	79	68	79	16	20	19	21.0161	16.6772	20.3487	3.84657	4.75965	5.04519	7.79e-07	-1.64069	down
AT5G41860.1	34	34	37	10	9	6	9.04491	8.3386	9.53042	2.40411	2.14184	1.59322	0.000564199	-1.64013	down
AT1G03410.1	67	71	71	21	15	15	17.8238	17.413	18.2881	5.04862	3.56974	3.98304	1.24e-06	-1.6373	down
AT1G80840.1	78	123	113	26	13	36	20.7501	30.1661	29.1064	6.25068	3.09377	9.5593	1.54e-05	-1.6365	down
[truncated: 3,547 more rows]
