# Supplementary material for: Full-length transcriptome sequencing of Arabidopsis plants provided new insights into the autophagic regulation of photosynthesis
Source: Sci Rep. 2024 Jun 25;14:14588. doi: 10.1038/s41598-024-65555-7 (PMC11199623; doi:10.1038/s41598-024-65555-7)
Supplement: Supplementary file 6 — Supplementary Table S5. [file 41598_2024_65555_MOESM6_ESM.xlsx]

## Sheet: A v.s B
Table S5.Alternative Splicing events between groups.
Event_Region	GeneID	Target_Exon	Event_Type	N	T	Exon_Type	Reference_Transcript	ﾎ捻SI(%)	T-test_p-value	FDR(BH)	N_Values	T_Values	DatabaseID
Chr3:4626859-4626941	AT3G13990	Chr3:4626859-4626861	A3SS	3	3	-	AT3G13990.1	28.65	0.000839658	0.00196314	37.5|46.1538461538462|46.1538461538462	72|74.1935483870968|69.5652173913043	Chr3_4626859_4626941_S_AT3G13990.1_1
Chr3:22573529-22573636	AT3G61010	Chr3:22573610-22573636	A5SS	3	3	-	ONT.11874.1	19.55	0.00802345	0.0170798	43.5897435897436|45.4545454545455|38.6363636363636	55.2631578947368|65.8536585365854|65.2173913043478	Chr3_22573529_22573636_S_ONT.11874.1_1
Chr4:13852342-13852515	AT4G27800	Chr4:13852342-13852415	A3SS	3	3	-	Ex.ONT.14414.4	17.2	0.00193921	0.00584538	74.0740740740741|71.4285714285714|72.3404255319149	93.9393939393939|86.2068965517241|89.2857142857143	Chr4_13852342_13852515_S_Ex.ONT.14414.4_1
Chr5:1157266-1157377	AT5G04220	Chr5:1157352-1157377	A5SS	3	3	-	AT5G04220.1	15.35	0.00955717	0.0434148	45.1612903225806|48.2758620689655|48.1481481481481	67.3469387755102|56.6666666666667|63.6363636363636	Chr5_1157266_1157377_S_AT5G04220.1_1
Chr1:12437941-12438333	AT1G34150	Chr1:12437941-12437950	A5SS	3	3	-	ONT.1272.3	12.47	0.00970448	0.0100913	8.33333333333333|8.33333333333333|5.71428571428571	17.6470588235294|17.1428571428571|25	Chr1_12437941_12438333_S_ONT.1272.3_1
Chr3:20946248-20946577	AT3G56510	Chr3:20946248-20946250	TSS|A3SS	3	3	-	TSS.AT3G56510.2	11.73	0.00207804	0.00423948	23.5294117647059|18.75|22	34.5454545454545|33.3333333333333|31.5789473684211	Chr3_20946248_20946577_S_TSS.AT3G56510.2_1
Chr4:7637530-7637662	AT4G13100	Chr4:7637658-7637662	A5SS	3	3	-	AT4G13100.4	11.41	0.0017876	0.00719865	9.52380952380952|12.5|8.69565217391304	20|23.5294117647059|21.4285714285714	Chr4_7637530_7637662_S_AT4G13100.4_1
Chr5:24091334-24092116	ONT.19132	Chr5:24091492-24091570	IR (overlapping region)	3	3	-	ONT.19132.1	-10.04	0.0017963	0.0145548	11.3636363636364|7.31707317073171|11.4285714285714	0|0|0	Chr5_24091492_24091570_R_ONT.19132.1_1
Chr3:19207281-19208448	ONT.9572	Chr3:19207462-19207538	IR (overlapping region)	3	3	-	ONT.9572.1	-10.04	0.000151851	0.00028845	8.7719298245614|11.2582781456954|10.0917431192661	0|0|0	Chr3_19207462_19207538_R_ONT.9572.1_1
Chr4:12551054-12551151	AT4G24180	Chr4:12551054-12551068	A3SS	3	3	-	AT4G24180.1	-10.05	0.00895131	0.0255388	31.5789473684211|31.25|37.5	22.2222222222222|23.8095238095238|24.1379310344828	Chr4_12551054_12551151_S_AT4G24180.1_1
Chr3:23262950-23264238	AT3G62940	Chr3:23263998-23264138	IR	3	3	-	Ex.AT3G62940.1	-10.24	0.000353341	0.000766556	11.7647058823529|8.62068965517241|10.3448275862069	0|0|0	Chr3_23263998_23264138_R_Ex.AT3G62940.1_1
Chr2:10066163-10067734	AT2G23680	Chr2:10066361-10066452	IR	3	3	-	ONT.5655.5	-10.26	0.00150296	0.00206901	10.958904109589|7.69230769230769|12.1212121212121	0|0|0	Chr2_10066361_10066452_R_ONT.5655.5_1
Chr2:10066163-10067734	AT2G23680	Chr2:10066359-10066452	IR	3	3	-	ONT.5655.5	-10.26	0.00150296	0.00206901	10.958904109589|7.69230769230769|12.1212121212121	0|0|0	Chr2_10066359_10066452_R_ONT.5655.5_1
Chr1:9482560-9482912	AT1G27290	Chr1:9482621-9482636	IR	3	3	-	AT1G27290.1	-10.42	4.48572e-05	6.13003e-05	9.60698689956332|11.4630467571644|10.1973684210526	0|0|0	Chr1_9482621_9482636_R_AT1G27290.1_1
Chr2:424428-425710	AT2G01918	Chr2:424635-425417	IR	3	3	-	ONT.6672.2	-10.45	1.31954e-06	2.17868e-06	10|10.7142857142857|10.6382978723404	0|0|0	Chr2_424635_425417_R_ONT.6672.2_1
Chr5:10293044-10295261	ONT.15976	Chr5:10294254-10294706	IR (overlapping region)	3	3	-	ONT.15976.2	-10.47	0.00179954	0.00805357	9.2896174863388|13.2947976878613|8.82352941176471	0|0|0	Chr5_10294254_10294706_R_ONT.15976.2_1
Chr5:24251319-24251613	AT5G60230	Chr5:24251437-24251521	IR (overlapping region)	3	3	-	AT5G60230.1	-10.49	0.0088362	0.0740044	6.66666666666667|10.5263157894737|14.2857142857143	0|0|0	Chr5_24251437_24251521_R_AT5G60230.1_1
Chr1:1477462-1478870	ONT.2770	Chr1:1477744-1478757	IR	3	3	-	Ex.ONT.2770.11	-10.54	0.00334661	0.00350404	8.25688073394496|9.52380952380952|13.8297872340426	0|0|0	Chr1_1477744_1478757_R_Ex.ONT.2770.11_1
Chr1:1477461-1478879	ONT.2770	Chr1:1477744-1478755	IR	3	3	-	Ex.ONT.2770.7	-10.54	0.00334661	0.00350404	8.25688073394496|9.52380952380952|13.8297872340426	0|0|0	Chr1_1477744_1478755_R_Ex.ONT.2770.7_1
Chr5:8794252-8796688	AT5G25350	Chr5:8794404-8794494	IR (overlapping region)	3	3	-	AT5G25350.1	-10.63	0.002217	0.190926	8.23529411764706|13.4570765661253|10.1941747572816	0|0|0	Chr5_8794404_8794494_R_AT5G25350.1_1
Chr5:8794252-8796688	AT5G25350	Chr5:8794403-8794496	IR (overlapping region)	3	3	-	AT5G25350.1	-10.63	0.002217	0.190926	8.23529411764706|13.4570765661253|10.1941747572816	0|0|0	Chr5_8794403_8794496_R_AT5G25350.1_1
Chr3:22603018-22604554	AT3G61060	Chr3:22603493-22603580	IR	3	3	-	ONT.9933.4	-10.77	0.000431235	0.000918674	8.97435897435897|12.4542124542125|10.8949416342412	0|0|0	Chr3_22603493_22603580_R_ONT.9933.4_1
Chr3:22602919-22603702	AT3G61060	Chr3:22603493-22603583	IR	3	3	-	Ex.AT3G61060.1	-10.77	0.000431235	0.000918674	8.97435897435897|12.4542124542125|10.8949416342412	0|0|0	Chr3_22603493_22603583_R_Ex.AT3G61060.1_1
Chr5:26421864-26423489	AT5G66070	Chr5:26422050-26422168	IR	3	3	-	ONT.17164.4	-10.8	0.00213994	0.0232467	11.1111111111111|8|13.28125	0|0|0	Chr5_26422050_26422168_R_ONT.17164.4_1
Chr2:9737612-9738298	AT2G22860	Chr2:9737789-9737936	IR	3	3	-	ONT.5621.2	-10.89	0.000468733	0.000817769	9.22330097087379|10.6382978723404|12.7962085308057	0|0|0	Chr2_9737789_9737936_R_ONT.5621.2_1
Chr2:9737612-9738298	AT2G22860	Chr2:9737781-9737936	IR	3	3	-	ONT.5621.2	-10.89	0.000468733	0.000817769	9.22330097087379|10.6382978723404|12.7962085308057	0|0|0	Chr2_9737781_9737936_R_ONT.5621.2_1
Chr3:19822745-19823406	AT3G53470	Chr3:19822943-19823017	IR	3	3	-	Ex.AT3G53470.2	-10.92	4.88058e-06	9.44272e-06	10.5820105820106|11.5819209039548|10.6109324758842	0|0|0	Chr3_19822943_19823017_R_Ex.AT3G53470.2_1
Chr3:19822726-19823493	AT3G53470	Chr3:19822943-19823020	IR	3	3	-	Ex.AT3G53470.1	-10.92	4.88058e-06	9.44272e-06	10.5820105820106|11.5819209039548|10.6109324758842	0|0|0	Chr3_19822943_19823020_R_Ex.AT3G53470.1_1
Chr3:11383267-11383992	AT3G29575	Chr3:11383662-11383923	IR	3	3	-	Ex.AT3G29575.4	-10.95	0.00835783	0.0148721	6.89655172413793|14.7058823529412|11.25	0|0|0	Chr3_11383662_11383923_R_Ex.AT3G29575.4_1
Chr3:3931580-3933350	AT3G12350	Chr3:3932457-3932666	IR	3	3	-	ONT.8562.3	-11.05	0.00552074	0.0126438	7.14285714285714|13.953488372093|12.0481927710843	0|0|0	Chr3_3932457_3932666_R_ONT.8562.3_1
Chr2:15605889-15607840	AT2G37150	Chr2:15605994-15607694	IR	3	3	-	Ex.AT2G37150.2	-11.11	0.00330812	0.0049392	12|13.6363636363636|7.69230769230769	0|0|0	Chr2_15605994_15607694_R_Ex.AT2G37150.2_1
Chr5:15879573-15881023	AT5G39660	Chr5:15880780-15880987	IR	3	3	-	AT5G39660.1	-11.18	0.00313861	0.0154248	13.3333333333333|12.5|7.69230769230769	0|0|0	Chr5_15880780_15880987_R_AT5G39660.1_1
Chr2:13672250-13673256	AT2G32180	Chr2:13672809-13673187	IR	3	3	-	Ex.AT2G32180.1	-11.32	3.48725e-05	5.08633e-05	10.4417670682731|12.3552123552124|11.1607142857143	0|0|0	Chr2_13672809_13673187_R_Ex.AT2G32180.1_1
Chr1:7554976-7555182	AT1G21560	Chr1:7554976-7555007	A5SS	3	3	-	Ex.ONT.852.4	-11.33	0.00539886	0.00718218	36.8421052631579|42.8571428571429|42.2222222222222	29.7297297297297|30.4347826086957|27.7777777777778	Chr1_7554976_7555182_S_Ex.ONT.852.4_1
Chr2:13678255-13678719	AT2G32210	Chr2:13678394-13678508	IR	3	3	-	ONT.5958.2	-11.38	0.00462338	0.00674236	8.64197530864197|10.2564102564103|15.2542372881356	0|0|0	Chr2_13678394_13678508_R_ONT.5958.2_1
Chr2:13677991-13678723	AT2G32210	Chr2:13678112-13678254	IR	3	3	-	ONT.5958.3	-11.38	0.00462338	0.00674236	8.64197530864197|10.2564102564103|15.2542372881356	0|0|0	Chr2_13678112_13678254_R_ONT.5958.3_1
Chr2:13677991-13678723	AT2G32210	Chr2:13678108-13678254	IR	3	3	-	ONT.5958.3	-11.38	0.00462338	0.00674236	8.64197530864197|10.2564102564103|15.2542372881356	0|0|0	Chr2_13678108_13678254_R_ONT.5958.3_1
Chr1:7088015-7089210	AT1G20450	Chr1:7088688-7088777	IR (overlapping region)	3	3	-	ONT.3399.1	-11.39	0.00337739	0.0044672	8.98692810457516|10.2040816326531|14.975845410628	0|0|0	Chr1_7088688_7088777_R_ONT.3399.1_1
Chr5:2204248-2205715	AT5G07100	Chr5:2204466-2204607	IR	3	3	-	ONT.15208.4	-11.44	0.00678961	0.0471652	15.1785714285714|11.6788321167883|7.47663551401869	0|0|0	Chr5_2204466_2204607_R_ONT.15208.4_1
Chr1:27118485-27119147	AT1G72060	Chr1:27118537-27118640	IR	3	3	-	ONT.2226.3	-11.44	9.12844e-05	0.000107662	12.0192307692308|12.2831367106176|10.0065402223676	0|0|0	Chr1_27118537_27118640_R_ONT.2226.3_1
Chr5:17152763-17153562	AT5G42770	Chr5:17153217-17153297	SES	3	3	-	AT5G42770.2	-11.49	0.00328737	0.0169919	80.5555555555556|84.2105263157895|85.9154929577465	71.2121212121212|73.9130434782609|71.0843373493976	Chr5_17152763_17153562_W_AT5G42770.2_1
Chr1:27118485-27119147	AT1G72060	Chr1:27118537-27118652	IR	3	3	-	ONT.2226.3	-11.56	8.98513e-05	0.000105975	12.1295658166782|12.4305555555556|10.1241018941868	0|0|0	Chr1_27118537_27118652_R_ONT.2226.3_1
Chr4:11859004-11860208	AT4G22530	Chr4:11859883-11859979	IR	3	3	-	Ex.AT4G22530.1	-11.6	0.000139201	0.000390353	10.3092783505155|11.3821138211382|13.0952380952381	0|0|0	Chr4_11859883_11859979_R_Ex.AT4G22530.1_1
Chr2:1547538-1548999	ONT.6742	Chr2:1548253-1548938	IR	3	3	-	ONT.6742.2	-11.66	0.000462511	0.00069308	13.8461538461538|10.2564102564103|10.8695652173913	0|0|0	Chr2_1548253_1548938_R_ONT.6742.2_1
Chr5:310086-312097	AT5G01810	Chr5:311309-311443	IR	3	3	-	AT5G01810.1	-11.7	0.000917953	0.0119179	11.6279069767442|9.43396226415094|14.0350877192982	0|0|0	Chr5_311309_311443_R_AT5G01810.1_1
Chr3:6170292-6171608	ONT.8814	Chr3:6171263-6171348	IR (overlapping region)	3	3	-	ONT.8814.1	-11.71	0.000425424	0.0010397	11.2244897959184|10.1123595505618|13.7931034482759	0|0|0	Chr3_6171263_6171348_R_ONT.8814.1_1
Chr2:19614698-19615769	AT2G47910	Chr2:19614937-19615014	IR (overlapping region)	3	3	-	AT2G47910.2	-11.74	0.000286979	0.00046705	13.4920634920635|10.0719424460432|11.6666666666667	0|0|0	Chr2_19614937_19615014_R_AT2G47910.2_1
Chr4:13839101-13839781	AT4G27740	Chr4:13839238-13839391	IR	3	3	-	ONT.12926.3	-11.76	0.000837512	0.00252122	10.6060606060606|10.3139013452915|14.3646408839779	0|0|0	Chr4_13839238_13839391_R_ONT.12926.3_1
Chr4:13839075-13839763	AT4G27740	Chr4:13839241-13839391	IR	3	3	-	Ex.AT4G27740.1	-11.76	0.000837512	0.00252122	10.6060606060606|10.3139013452915|14.3646408839779	0|0|0	Chr4_13839241_13839391_R_Ex.AT4G27740.1_1
Chr5:25736689-25737608	AT5G64360	Chr5:25736891-25737203	IR	3	3	-	Ex.AT5G64360.1	-11.78	0.00209117	0.0202094	9.09090909090909|11.4285714285714|14.8148148148148	0|0|0	Chr5_25736891_25737203_R_Ex.AT5G64360.1_1
Chr1:9067522-9068207	AT1G26210	Chr1:9067842-9068056	IR	3	3	-	AT1G26210.1	-11.88	0.00173874	0.00236706	9.75609756097561|15|10.8695652173913	0|0|0	Chr1_9067842_9068056_R_AT1G26210.1_1
Chr1:9067522-9068207	AT1G26210	Chr1:9067838-9068056	IR	3	3	-	AT1G26210.1	-11.88	0.00173874	0.00236706	9.75609756097561|15|10.8695652173913	0|0|0	Chr1_9067838_9068056_R_AT1G26210.1_1
Chr5:2330399-2332281	AT5G07370	Chr5:2330498-2330784	IR	3	3	-	AT5G07370.4	-11.91	0.000818251	0.00616515	9.32642487046632|12.8205128205128|13.5964912280702	0|0|0	Chr5_2330498_2330784_R_AT5G07370.4_1
Chr4:13839101-13839781	AT4G27740	Chr4:13839212-13839391	IR	3	3	-	ONT.12926.3	-11.91	0.000667262	0.0020092	11.0552763819095|10.3139013452915|14.3646408839779	0|0|0	Chr4_13839212_13839391_R_ONT.12926.3_1
Chr1:24951241-24953921	AT1G66880	Chr1:24952059-24953891	IR	3	3	-	Ex.ONT.2011.5	-11.93	0.00270401	0.0031016	15.3846153846154|9.30232558139535|11.1111111111111	0|0|0	Chr1_24952059_24953891_R_Ex.ONT.2011.5_1
Chr1:2877678-2879182	AT1G08940	Chr1:2878151-2878715	IR (overlapping region)	3	3	-	ONT.319.2	-11.94	0.00400443	0.0048379	12|8.43373493975904|15.3846153846154	0|0|0	Chr1_2878151_2878715_R_ONT.319.2_1
Chr1:25453929-25455748	AT1G67880	Chr1:25455182-25455381	IR	3	3	-	ONT.4598.2	-12.03	0.00682342	0.00786615	9.09090909090909|10.3448275862069|16.6666666666667	0|0|0	Chr1_25455182_25455381_R_ONT.4598.2_1
Chr1:7768043-7770135	AT1G22040	Chr1:7768052-7768345	IR	3	3	-	ONT.874.3	-12.05	0.0034789	0.00464445	10.6382978723404|9.61538461538462|15.9090909090909	0|0|0	Chr1_7768052_7768345_R_ONT.874.3_1
Chr1:8977599-8978222	ONT.3565	Chr1:8977600-8977692	IR (overlapping region)	3	3	-	ONT.3565.1	-12.2	3.46487e-05	4.71191e-05	12.4161073825503|13.1147540983607|11.0687022900763	0|0|0	Chr1_8977600_8977692_R_ONT.3565.1_1
Chr1:8977599-8978222	ONT.3565	Chr1:8977600-8977684	IR (overlapping region)	3	3	-	ONT.3565.1	-12.2	3.46487e-05	4.71191e-05	12.4161073825503|13.1147540983607|11.0687022900763	0|0|0	Chr1_8977600_8977684_R_ONT.3565.1_1
Chr5:22303134-22303488	AT5G54920	Chr5:22303134-22303148	A5SS	3	3	-	AT5G54920.2	-12.23	0.00565521	0.0399091	16.6666666666667|14.2857142857143|19.2307692307692	2.63157894736842|8|2.85714285714286	Chr5_22303134_22303488_S_AT5G54920.2_1
Chr3:17576991-17579580	AT3G47675	Chr3:17577063-17578687	IR	3	3	-	Ex.ONT.11344.2	-12.25	0.000195185	0.000360997	11.5384615384615|11.1111111111111|14.1025641025641	0|0|0	Chr3_17577063_17578687_R_Ex.ONT.11344.2_1
Chr1:24952750-24953921	AT1G66880	Chr1:24953678-24953891	IR	3	3	-	Ex.ONT.2011.7	-12.38	0.000957185	0.00109824	10.8108108108108|15.2173913043478|11.1111111111111	0|0|0	Chr1_24953678_24953891_R_Ex.ONT.2011.7_1
Chr1:29524586-29526241	AT1G78480	Chr1:29525702-29526046	IR (overlapping region)	3	3	-	Ex.ONT.5014.1	-12.55	0.00614146	0.00748373	8|13.6363636363636|16	0|0|0	Chr1_29525702_29526046_R_Ex.ONT.5014.1_1
Chr2:19240338-19241767	AT2G46810	Chr2:19240816-19241167	IR	3	3	-	Ex.ONT.6562.2	-12.58	0.000497998	0.000804581	15|11.6279069767442|11.1111111111111	0|0|0	Chr2_19240816_19241167_R_Ex.ONT.6562.2_1
Chr2:19240318-19241767	AT2G46810	Chr2:19240811-19241167	IR	3	3	-	Ex.ONT.6562.1	-12.58	0.000497998	0.000804581	15|11.6279069767442|11.1111111111111	0|0|0	Chr2_19240811_19241167_R_Ex.ONT.6562.1_1
Chr3:17577348-17579577	AT3G47680	Chr3:17578462-17578687	IR (overlapping region)	3	3	-	Ex.ONT.11344.7	-12.61	8.09094e-05	0.000149651	11.5384615384615|12.1951219512195|14.1025641025641	0|0|0	Chr3_17578462_17578687_R_Ex.ONT.11344.7_1
Chr3:17577154-17578778	AT3G47675	Chr3:17577184-17578687	IR	3	3	-	Ex.ONT.11344.1	-12.61	8.09094e-05	0.000149651	11.5384615384615|12.1951219512195|14.1025641025641	0|0|0	Chr3_17577184_17578687_R_Ex.ONT.11344.1_1
Chr3:7838884-7839467	AT3G22210	Chr3:7839249-7839335	IR	3	3	-	ONT.10921.1	-12.65	0.000338625	0.00086544	14.3805309734513|12.9896907216495|10.5793450881612	0|0|0	Chr3_7839249_7839335_R_ONT.10921.1_1
Chr2:2861784-2863509	ONT.6777	Chr2:2862154-2862284	IR	3	3	-	ONT.6777.2	-12.67	0.00153686	0.00250962	12.4293785310734|9.95024875621891|15.6424581005587	0|0|0	Chr2_2862154_2862284_R_ONT.6777.2_1
Chr4:9291153-9293290	ONT.13960	Chr4:9291789-9291877	IR (overlapping region)	3	3	-	ONT.13960.1	-12.72	0.00351191	0.0151452	8.69565217391304|15.5172413793103|13.953488372093	0|0|0	Chr4_9291789_9291877_R_ONT.13960.1_1
Chr1:29525501-29525860	AT1G78480	Chr1:29525702-29525784	IR (overlapping region)	3	3	-	Ex.AT1G78480.1	-12.77	0.00734341	0.00894809	8|13.6363636363636|16.6666666666667	0|0|0	Chr1_29525702_29525784_R_Ex.AT1G78480.1_1
Chr4:8526427-8528010	AT4G14905	Chr4:8526616-8526851	IR	3	3	-	AT4G14905.2	-12.9	0.00894289	0.0373429	8.51063829787234|17.8571428571429|12.3287671232877	0|0|0	Chr4_8526616_8526851_R_AT4G14905.2_1
Chr4:18289060-18289856	AT4G39320	Chr4:18289234-18289333	IR	3	3	-	ONT.13418.3	-12.9	0.00556222	0.0201968	10.5263157894737|10.5263157894737|17.6470588235294	0|0|0	Chr4_18289234_18289333_R_ONT.13418.3_1
Chr3:19324169-19324469	AT3G52105	Chr3:19324361-19324458	IR (overlapping region)	3	3	-	ONT.9587.3	-12.95	0.00232287	0.00443919	16|9.52380952380952|13.3333333333333	0|0|0	Chr3_19324361_19324458_R_ONT.9587.3_1
Chr1:20803704-20804573	AT1G55675	Chr1:20803961-20804302	IR	3	3	-	AT1G55675.1	-13.17	0.000785301	0.000861727	15.5737704918033|10.6060606060606|13.3333333333333	0|0|0	Chr1_20803961_20804302_R_AT1G55675.1_1
Chr3:1754687-1755631	AT3G05870	Chr3:1755053-1755591	IR	3	3	-	Ex.AT3G05870.1	-13.37	0.00992686	0.0183498	9.52380952380952|19.047619047619|11.5384615384615	0|0|0	Chr3_1755053_1755591_R_Ex.AT3G05870.1_1
Chr3:1754687-1755631	AT3G05870	Chr3:1755026-1755591	IR	3	3	-	Ex.AT3G05870.2	-13.37	0.00992686	0.0183498	9.52380952380952|19.047619047619|11.5384615384615	0|0|0	Chr3_1755026_1755591_R_Ex.AT3G05870.2_1
Chr5:4041120-4042074	AT5G12440	Chr5:4041346-4042037	IR	3	3	-	ONT.17674.2	-13.38	0.000419246	0.0064495	11.1111111111111|13.6363636363636|15.3846153846154	0|0|0	Chr5_4041346_4042037_R_ONT.17674.2_1
Chr5:4041111-4041709	AT5G12440	Chr5:4041346-4041473	IR	3	3	-	Ex.ONT.17674.1	-13.38	0.000419246	0.0064495	11.1111111111111|13.6363636363636|15.3846153846154	0|0|0	Chr5_4041346_4041473_R_Ex.ONT.17674.1_1
Chr1:18402506-18403126	AT1G49730	Chr1:18402893-18403012	IR	3	3	-	AT1G49730.1	-13.38	0.00201717	0.00215272	16.4556962025316|13.6986301369863|10	0|0|0	Chr1_18402893_18403012_R_AT1G49730.1_1
Chr5:3332382-3334971	AT5G10540	Chr5:3333090-3334906	IR (overlapping region)	3	3	-	Ex.AT5G10540.1	-13.39	0.000302973	0.0040623	12.3762376237624|12.1212121212121|15.668202764977	0|0|0	Chr5_3333090_3334906_R_Ex.AT5G10540.1_1
Chr3:18881181-18881350	AT3G50790	Chr3:18881181-18881202	A3SS	3	3	-	AT3G50790.1	-13.39	0.00565397	0.0106669	93.1818181818182|89.3617021276596|91.1111111111111	78|81.5789473684211|73.9130434782609	Chr3_18881181_18881350_S_AT3G50790.1_1
Chr1:3395571-3396879	AT1G10360	Chr1:3396101-3396485	IR	3	3	-	ONT.2995.2	-13.61	3.35754e-06	4.18617e-06	13.5416666666667|13|14.2857142857143	0|0|0	Chr1_3396101_3396485_R_ONT.2995.2_1
Chr3:22398737-22399903	AT3G60590	Chr3:22398767-22398885	IR	3	3	-	Ex.AT3G60590.1	-13.63	0.00517218	0.010964	8.82352941176471|15.1515151515152|16.9230769230769	0|0|0	Chr3_22398767_22398885_R_Ex.AT3G60590.1_1
Chr3:22398732-22399887	AT3G60590	Chr3:22398782-22398885	IR	3	3	-	Ex.TSS.ONT.9910.3	-13.63	0.00517218	0.010964	8.82352941176471|15.1515151515152|16.9230769230769	0|0|0	Chr3_22398782_22398885_R_Ex.TSS.ONT.9910.3_1
Chr4:18273973-18275017	AT4G39260	Chr4:18274570-18274855	IR	3	3	-	ONT.14900.3	-13.64	1.37112e-07	4.97421e-07	13.6669874879692|13.9190952588082|13.339552238806	0|0|0	Chr4_18274570_18274855_R_ONT.14900.3_1
Chr4:18273973-18275017	AT4G39260	Chr4:18274570-18274848	IR	3	3	-	ONT.14900.3	-13.64	1.37112e-07	4.97421e-07	13.6669874879692|13.9190952588082|13.339552238806	0|0|0	Chr4_18274570_18274848_R_ONT.14900.3_1
Chr4:18273973-18275017	AT4G39260	Chr4:18274568-18274850	IR	3	3	-	ONT.14900.3	-13.64	1.37112e-07	4.97421e-07	13.6669874879692|13.9190952588082|13.339552238806	0|0|0	Chr4_18274568_18274850_R_ONT.14900.3_1
Chr3:11193576-11194887	AT3G29250	Chr3:11194536-11194826	IR	3	3	-	ONT.11168.3	-13.66	0.00106083	0.00188285	15.5172413793103|15|10.4477611940298	0|0|0	Chr3_11194536_11194826_R_ONT.11168.3_1
Chr3:11193576-11194887	AT3G29250	Chr3:11194536-11194822	IR	3	3	-	ONT.11168.3	-13.66	0.00106083	0.00188285	15.5172413793103|15|10.4477611940298	0|0|0	Chr3_11194536_11194822_R_ONT.11168.3_1
Chr3:11193576-11194887	AT3G29250	Chr3:11194536-11194820	IR	3	3	-	ONT.11168.3	-13.66	0.00106083	0.00188285	15.5172413793103|15|10.4477611940298	0|0|0	Chr3_11194536_11194820_R_ONT.11168.3_1
Chr4:18273973-18275017	AT4G39260	Chr4:18274568-18274692	IR	3	3	-	ONT.14900.3	-13.68	9.86466e-08	3.58017e-07	13.6669874879692|13.9565217391304|13.4203168685927	0|0|0	Chr4_18274568_18274692_R_ONT.14900.3_1
Chr2:9265253-9266371	AT2G21660	Chr2:9265894-9266036	IR	3	3	-	Ex.ONT.7034.2	-13.69	1.79099e-07	3.1061e-07	13.6775994417306|13.3836858006042|14.0068493150685	0|0|0	Chr2_9265894_9266036_R_Ex.ONT.7034.2_1
Chr1:1477545-1478884	ONT.2770	Chr1:1477819-1478699	IR	3	3	-	Ex.ONT.2770.47	-13.69	0.00430974	0.00451235	9.52380952380952|13.8888888888889|17.6470588235294	0|0|0	Chr1_1477819_1478699_R_Ex.ONT.2770.47_1
Chr2:9265280-9266371	AT2G21660	Chr2:9265896-9266200	IR	3	3	-	ONT.7034.8	-13.72	1.38774e-07	2.40721e-07	13.6474694589878|13.4621189254452|14.0362889421431	0|0|0	Chr2_9265896_9266200_R_ONT.7034.8_1
Chr2:9265280-9266371	AT2G21660	Chr2:9265894-9266202	IR	3	3	-	ONT.7034.8	-13.72	1.38774e-07	2.40721e-07	13.6474694589878|13.4621189254452|14.0362889421431	0|0|0	Chr2_9265894_9266202_R_ONT.7034.8_1
Chr3:11193576-11194887	AT3G29250	Chr3:11194541-11194831	IR	3	3	-	ONT.11168.3	-13.74	0.00113047	0.00200636	15.5172413793103|15.2542372881356|10.4477611940298	0|0|0	Chr3_11194541_11194831_R_ONT.11168.3_1
Chr2:12617936-12618467	AT2G29420	Chr2:12618080-12618300	IR	3	3	-	AT2G29420.1	-13.74	0.000391122	0.000559576	13.4078212290503|16.0621761658031|11.7647058823529	0|0|0	Chr2_12618080_12618300_R_AT2G29420.1_1
Chr1:12550957-12552629	AT1G34370	Chr1:12551268-12551361	IR	3	3	-	AT1G34370.1	-13.77	2.38085e-05	2.47765e-05	14.4404332129964|12.5391849529781|14.3333333333333	0|0|0	Chr1_12551268_12551361_R_AT1G34370.1_1
Chr1:22767674-22768502	AT1G61667	Chr1:22768089-22768213	IR (overlapping region)	3	3	-	ONT.1820.2	-13.83	0.0068089	0.00759385	12.8205128205128|9.75609756097561|18.9189189189189	0|0|0	Chr1_22768089_22768213_R_ONT.1820.2_1
Chr2:9265280-9266371	AT2G21660	Chr2:9265885-9266200	IR	3	3	-	ONT.7034.8	-13.93	3.65893e-07	6.34537e-07	13.8396025550035|13.597298956415|14.3408134642356	0|0|0	Chr2_9265885_9266200_R_ONT.7034.8_1
Chr5:2330399-2332281	AT5G07370	Chr5:2330498-2331232	IR	3	3	-	AT5G07370.4	-14.14	0.000361492	0.00272479	11.6161616161616|15.3526970954357|15.450643776824	0|0|0	Chr5_2330498_2331232_R_AT5G07370.4_1
Chr5:2330399-2332281	AT5G07370	Chr5:2330498-2331226	IR	3	3	-	AT5G07370.4	-14.14	0.000361492	0.00272479	11.6161616161616|15.3526970954357|15.450643776824	0|0|0	Chr5_2330498_2331226_R_AT5G07370.4_1
Chr3:18935815-18936619	AT3G50950	Chr3:18935888-18936115	IR	3	3	-	ONT.9531.3	-14.15	0.00315408	0.00593872	9.6969696969697|16.5|16.2650602409639	0|0|0	Chr3_18935888_18936115_R_ONT.9531.3_1
Chr3:18935815-18936619	AT3G50950	Chr3:18935888-18936109	IR	3	3	-	ONT.9531.3	-14.15	0.00315408	0.00593872	9.6969696969697|16.5|16.2650602409639	0|0|0	Chr3_18935888_18936109_R_ONT.9531.3_1
Chr1:12550957-12552629	AT1G34370	Chr1:12551420-12551535	IR	3	3	-	AT1G34370.1	-14.15	3.00512e-05	3.1272e-05	14.7482014388489|12.8125|14.9006622516556	0|0|0	Chr1_12551420_12551535_R_AT1G34370.1_1
Chr2:19349425-19350562	AT2G47130	Chr2:19350387-19350467	IR	3	3	-	ONT.8067.2	-14.17	0.00862068	0.0139523	9.61538461538462|19.6969696969697|13.2075471698113	0|0|0	Chr2_19350387_19350467_R_ONT.8067.2_1
Chr2:19349425-19350562	AT2G47130	Chr2:19350387-19350463	IR	3	3	-	ONT.8067.2	-14.17	0.00862068	0.0139523	9.61538461538462|19.6969696969697|13.2075471698113	0|0|0	Chr2_19350387_19350463_R_ONT.8067.2_1
Chr1:28372121-28373191	AT1G75560	Chr1:28372563-28372748	SES	3	3	-	AT1G75560.1	-14.25	0.00156633	0.00187811	86.1417322834646|89.0432098765432|86.4297253634895	73.5353535353535|69.9052132701422|75.4166666666667	Chr1_28372121_28373191_W_AT1G75560.1_1
Chr1:29993208-29993914	ONT.2544	Chr1:29993405-29993485	IR (overlapping region)	3	3	-	ONT.2544.1	-14.29	0.00138245	0.00168109	10.6918238993711|15.7894736842105|16.3841807909604	0|0|0	Chr1_29993405_29993485_R_ONT.2544.1_1
Chr1:6529777-6532614	AT1G18900	Chr1:6532337-6532439	IR	3	3	-	AT1G18900.1	-14.31	0.000760606	0.000999364	17.3913043478261|13.0434782608696|12.5	0|0|0	Chr1_6532337_6532439_R_AT1G18900.1_1
Chr3:4182995-4183975	AT3G13060	Chr3:4183208-4183293	IR (overlapping region)	3	3	-	AT3G13060.1	-14.43	0.00660917	0.0152617	11.4864864864865|20|11.8055555555556	0|0|0	Chr3_4183208_4183293_R_AT3G13060.1_1
Chr1:1477507-1478874	ONT.2770	Chr1:1477816-1478699	IR	3	3	-	Ex.ONT.2770.27	-14.46	0.00445968	0.0046692	9.52380952380952|16.2162162162162|17.6470588235294	0|0|0	Chr1_1477816_1478699_R_Ex.ONT.2770.27_1
Chr2:18461957-18463271	AT2G44790	Chr2:18462619-18463060	IR (overlapping region)	3	3	-	ONT.7975.2	-14.6	0.000859991	0.00136843	15.9090909090909|11.3636363636364|16.5413533834586	0|0|0	Chr2_18462619_18463060_R_ONT.7975.2_1
Chr5:2330399-2332281	AT5G07370	Chr5:2331044-2331226	IR	3	3	-	AT5G07370.4	-14.68	0.000222067	0.00167455	12.3655913978495|15.8798283261803|15.7894736842105	0|0|0	Chr5_2331044_2331226_R_AT5G07370.4_1
Chr5:2330399-2332281	AT5G07370	Chr5:2330845-2331226	IR	3	3	-	AT5G07370.4	-14.68	0.000222067	0.00167455	12.3655913978495|15.8798283261803|15.7894736842105	0|0|0	Chr5_2330845_2331226_R_AT5G07370.4_1
Chr1:4575408-4576632	AT1G13350	Chr1:4575836-4576238	IR	3	3	-	Ex.AT1G13350.1	-14.7	0.00019239	0.000243998	12.5|15.4761904761905|16.1290322580645	0|0|0	Chr1_4575836_4576238_R_Ex.AT1G13350.1_1
Chr2:12905556-12906167	ONT.5897	Chr2:12905827-12905953	IR (overlapping region)	3	3	-	ONT.5897.1	-14.72	0.00132509	0.00190266	18.4|13.013698630137|12.751677852349	0|0|0	Chr2_12905827_12905953_R_ONT.5897.1_1
Chr1:13838548-13839083	ONT.3886	Chr1:13838776-13839001	IR	3	3	-	ONT.3886.2	-14.72	0.000413849	0.000432715	13.4615384615385|17.4418604651163|13.265306122449	0|0|0	Chr1_13838776_13839001_R_ONT.3886.2_1
Chr3:4377097-4378414	AT3G13440	Chr3:4378075-4378333	IR (overlapping region)	3	3	-	Ex.AT3G13440.1	-14.74	0.00572728	0.0132835	9.85915492957746|19.3181818181818|15.0537634408602	0|0|0	Chr3_4378075_4378333_R_Ex.AT3G13440.1_1
Chr2:12905556-12906167	ONT.5897	Chr2:12906043-12906155	IR (overlapping region)	3	3	-	ONT.5897.1	-14.76	0.00159228	0.00228623	18.5483870967742|13.5714285714286|12.1621621621622	0|0|0	Chr2_12906043_12906155_R_ONT.5897.1_1
Chr3:2393691-2394675	AT3G07510	Chr3:2394487-2394573	IR	3	3	-	Ex.AT3G07510.1	-14.79	0.000209662	0.000457327	17.0731707317073|13.8888888888889|13.4146341463415	0|0|0	Chr3_2394487_2394573_R_Ex.AT3G07510.1_1
Chr3:2393691-2394616	AT3G07510	Chr3:2394487-2394567	IR	3	3	-	Ex.ONT.10324.1	-14.79	0.000209662	0.000457327	17.0731707317073|13.8888888888889|13.4146341463415	0|0|0	Chr3_2394487_2394567_R_Ex.ONT.10324.1_1
Chr4:18273957-18274567	AT4G39260	Chr4:18274279-18274470	IR	3	3	-	ONT.14900.2	-14.88	1.58616e-07	5.75381e-07	14.7743467933492|15.2462526766595|14.6139705882353	0|0|0	Chr4_18274279_18274470_R_ONT.14900.2_1
Chr5:20106653-20107191	AT5G49550	Chr5:20107002-20107072	IR	3	3	-	Ex.AT5G49550.1	-14.89	0.00207865	0.0125191	14.2011834319527|18.8235294117647|11.6564417177914	0|0|0	Chr5_20107002_20107072_R_Ex.AT5G49550.1_1
Chr2:9265280-9266371	AT2G21660	Chr2:9265491-9266202	IR	3	3	-	ONT.7034.8	-14.92	1.40336e-07	2.43418e-07	14.9264190609671|14.5934466019417|15.2324774462179	0|0|0	Chr2_9265491_9266202_R_ONT.7034.8_1
Chr2:9265280-9266371	AT2G21660	Chr2:9265485-9266202	IR	3	3	-	ONT.7034.8	-14.93	1.67349e-07	2.9026e-07	14.9264190609671|14.5934466019417|15.2618799861256	0|0|0	Chr2_9265485_9266202_R_ONT.7034.8_1
Chr5:20106631-20107210	AT5G49550	Chr5:20106983-20107072	IR	3	3	-	Ex.ONT.18763.3	-15.07	0.00154532	0.00930851	14.2011834319527|18.8235294117647|12.1951219512195	0|0|0	Chr5_20106983_20107072_R_Ex.ONT.18763.3_1
Chr5:23493211-23494172	AT5G58040	Chr5:23493706-23493943	IR	3	3	-	ONT.16836.5	-15.19	0.00431196	0.0330563	18.1818181818182|10|17.3913043478261	0|0|0	Chr5_23493706_23493943_R_ONT.16836.5_1
Chr3:18733068-18734388	AT3G50480	Chr3:18733598-18733888	IR	3	3	-	Ex.AT3G50480.1	-15.3	0.000104022	0.00019588	14.6258503401361|14.0115163147793|17.2527472527473	0|0|0	Chr3_18733598_18733888_R_Ex.AT3G50480.1_1
Chr1:21214139-21215404	ONT.4258	Chr1:21214608-21214719	IR	3	3	-	ONT.4258.1	-15.36	0.00432361	0.00476753	11.4285714285714|20.3703703703704|14.2857142857143	0|0|0	Chr1_21214608_21214719_R_ONT.4258.1_1
Chr5:6470171-6471062	AT5G19240	Chr5:6470291-6470463	IR	3	3	-	ONT.15671.2	-15.4	0.0045835	0.114693	18.9473684210526|10.1321585903084|17.1171171171171	0|0|0	Chr5_6470291_6470463_R_ONT.15671.2_1
Chr2:19319783-19320992	ONT.6572	Chr2:19320459-19320541	IR (overlapping region)	3	3	-	ONT.6572.1	-15.44	3.82504e-06	6.18474e-06	16.2162162162162|14.7058823529412|15.3846153846154	0|0|0	Chr2_19320459_19320541_R_ONT.6572.1_1
Chr2:19319783-19320992	ONT.6572	Chr2:19320454-19320541	IR (overlapping region)	3	3	-	ONT.6572.1	-15.44	3.82504e-06	6.18474e-06	16.2162162162162|14.7058823529412|15.3846153846154	0|0|0	Chr2_19320454_19320541_R_ONT.6572.1_1
Chr2:8850238-8850886	AT2G20562	Chr2:8850491-8850737	IR	3	3	-	ONT.6986.2	-15.46	0.00600661	0.0102956	17.1428571428571|9.80392156862745|19.4444444444444	0|0|0	Chr2_8850491_8850737_R_ONT.6986.2_1
Chr5:3333459-3335232	AT5G10550	Chr5:3334920-3335013	IR (overlapping region)	3	3	-	Ex.AT5G10550.1	-15.54	1.65526e-05	0.00022202	14.7465437788018|15.0735294117647|16.793893129771	0|0|0	Chr5_3334920_3335013_R_Ex.AT5G10550.1_1
Chr3:19273494-19275269	AT3G51940	Chr3:19274982-19275069	IR	3	3	-	Ex.AT3G51940.1	-15.6	0.000738777	0.00140778	18.75|15|13.0434782608696	0|0|0	Chr3_19274982_19275069_R_Ex.AT3G51940.1_1
Chr1:1477528-1478874	ONT.2770	Chr1:1477777-1478810	IR	3	3	-	Ex.ONT.2770.41	-15.94	0.00169035	0.00177017	12.8205128205128|20|15	0|0|0	Chr1_1477777_1478810_R_Ex.ONT.2770.41_1
Chr1:1477462-1478884	ONT.2770	Chr1:1477919-1478739	IR	3	3	-	Ex.ONT.2770.12	-16.06	0.000359981	0.00037715	18.1818181818182|13.3333333333333|16.6666666666667	0|0|0	Chr1_1477919_1478739_R_Ex.ONT.2770.12_1
Chr4:9490995-9495816	AT4G16860	Chr4:9492073-9495230	IR	3	3	-	Ex.AT4G16860.1	-16.14	0.0093925	0.0407676	21.9101123595506|16.5137614678899|10	0|0|0	Chr4_9492073_9495230_R_Ex.AT4G16860.1_1
Chr1:12051739-12052559	ONT.1241	Chr1:12052117-12052198	IR (overlapping region)	3	3	-	ONT.1241.1	-16.33	0.00179175	0.00185835	14.5833333333333|20.7207207207207|13.6842105263158	0|0|0	Chr1_12052117_12052198_R_ONT.1241.1_1
Chr1:12051739-12052559	ONT.1241	Chr1:12052113-12052198	IR (overlapping region)	3	3	-	ONT.1241.1	-16.33	0.00179175	0.00185835	14.5833333333333|20.7207207207207|13.6842105263158	0|0|0	Chr1_12052113_12052198_R_ONT.1241.1_1
Chr3:7518924-7519477	AT3G21351	Chr3:7519090-7519187	IR	3	3	-	Ex.AT3G21351.1	-16.48	0.00450156	0.0114477	21.1764705882353|16.9491525423729|11.304347826087	0|0|0	Chr3_7519090_7519187_R_Ex.AT3G21351.1_1
Chr4:522627-524206	AT4G01250	Chr4:523588-523797	IR	3	3	-	ONT.13513.1	-16.5	0.00157978	0.0059925	13.6904761904762|20.7446808510638|15.0537634408602	0|0|0	Chr4_523588_523797_R_ONT.13513.1_1
Chr5:22203909-22205177	AT5G54660	Chr5:22204266-22204723	IR	3	3	-	ONT.16697.2	-16.58	0.00542753	0.0377103	20.8333333333333|10.7142857142857|18.1818181818182	0|0|0	Chr5_22204266_22204723_R_ONT.16697.2_1
Chr4:10151124-10152109	AT4G18372	Chr4:10151709-10152069	IR	3	3	-	ONT.14041.2	-16.61	0.003461	0.00928178	18|20.4081632653061|11.4285714285714	0|0|0	Chr4_10151709_10152069_R_ONT.14041.2_1
Chr4:10151050-10152115	AT4G18372	Chr4:10151712-10152074	IR	3	3	-	Ex.ONT.14041.1	-16.61	0.003461	0.00928178	18|20.4081632653061|11.4285714285714	0|0|0	Chr4_10151712_10152074_R_Ex.ONT.14041.1_1
Chr2:19310893-19311544	ONT.6570	Chr2:19311098-19311182	IR (overlapping region)	3	3	-	ONT.6570.1	-16.62	0.00398526	0.00640977	16.6666666666667|21.4285714285714|11.7647058823529	0|0|0	Chr2_19311098_19311182_R_ONT.6570.1_1
Chr2:15165437-15166465	AT2G36120	Chr2:15165784-15166158	IR	3	3	-	AT2G36120.1	-16.65	5.33047e-08	7.94259e-08	16.3636363636364|16.6666666666667|16.9230769230769	0|0|0	Chr2_15165784_15166158_R_AT2G36120.1_1
Chr4:7594776-7595988	AT4G12990	Chr4:7594840-7595823	IR	3	3	-	Ex.ONT.13804.3	-16.78	0.000197733	0.000792977	15.0943396226415|19.2982456140351|15.9420289855072	0|0|0	Chr4_7594840_7595823_R_Ex.ONT.13804.3_1
Chr1:2819068-2820020	AT1G08810	Chr1:2819859-2819969	IR (overlapping region)	3	3	-	AT1G08810.2	-16.84	0.000148355	0.000177419	17.1428571428571|18.75|14.6341463414634	0|0|0	Chr1_2819859_2819969_R_AT1G08810.2_1
Chr3:17577350-17579604	AT3G47680	Chr3:17578779-17579312	IR (overlapping region)	3	3	-	ONT.11344.10	-16.88	0.00082845	0.00153208	13.2352941176471|18|19.4029850746269	0|0|0	Chr3_17578779_17579312_R_ONT.11344.10_1
Chr1:1477507-1478882	ONT.2770	Chr1:1477757-1478768	IR	3	3	-	Ex.ONT.2770.38	-16.88	6.97198e-05	7.30555e-05	15.0943396226415|17.0212765957447|18.5185185185185	0|0|0	Chr1_1477757_1478768_R_Ex.ONT.2770.38_1
Chr1:1477507-1478879	ONT.2770	Chr1:1477756-1478766	IR	3	3	-	Ex.ONT.2770.34	-16.88	6.97198e-05	7.30555e-05	15.0943396226415|17.0212765957447|18.5185185185185	0|0|0	Chr1_1477756_1478766_R_Ex.ONT.2770.34_1
Chr1:1477461-1478879	ONT.2770	Chr1:1477756-1478768	IR	3	3	-	Ex.ONT.2770.6	-16.88	6.97198e-05	7.30555e-05	15.0943396226415|17.0212765957447|18.5185185185185	0|0|0	Chr1_1477756_1478768_R_Ex.ONT.2770.6_1
Chr1:13078138-13080265	AT1G35515	Chr1:13078268-13079889	IR	3	3	-	Ex.AT1G35515.1	-16.9	0.00305764	0.0031915	12|17.6470588235294|21.0526315789474	0|0|0	Chr1_13078268_13079889_R_Ex.AT1G35515.1_1
Chr5:26615355-26616990	AT5G66675	Chr5:26616575-26616707	IR	3	3	-	AT5G66675.1	-16.95	0.00133024	0.0150173	18.3098591549296|12.7906976744186|19.7530864197531	0|0|0	Chr5_26616575_26616707_R_AT5G66675.1_1
Chr5:1639454-1640606	AT5G05550	Chr5:1639552-1639823	IR	3	3	-	Ex.AT5G05550.2	-17.13	0.0013471	0.00674447	18|20.3389830508475|13.0434782608696	0|0|0	Chr5_1639552_1639823_R_Ex.AT5G05550.2_1
Chr4:18276672-18279708	ONT.14901	Chr4:18278769-18278856	IR (overlapping region)	3	3	-	ONT.14901.1	-17.22	9.74209e-07	3.53359e-06	16.6666666666667|17.1428571428571|17.8571428571429	0|0|0	Chr4_18278769_18278856_R_ONT.14901.1_1
Chr1:1477507-1478874	ONT.2770	Chr1:1477792-1478703	IR	3	3	-	Ex.ONT.2770.28	-17.27	0.000979169	0.0010257	13.6363636363636|20.5128205128205|17.6470588235294	0|0|0	Chr1_1477792_1478703_R_Ex.ONT.2770.28_1
Chr1:1477507-1478873	ONT.2770	Chr1:1477796-1478703	IR	3	3	-	Ex.ONT.2770.24	-17.27	0.000979169	0.0010257	13.6363636363636|20.5128205128205|17.6470588235294	0|0|0	Chr1_1477796_1478703_R_Ex.ONT.2770.24_1
Chr5:26615355-26616990	AT5G66675	Chr5:26616687-26616812	IR	3	3	-	AT5G66675.1	-17.29	0.000650475	0.00734555	18.3098591549296|13.7931034482759|19.7530864197531	0|0|0	Chr5_26616687_26616812_R_AT5G66675.1_1
Chr2:1687340-1687817	AT2G04800	Chr2:1687617-1687788	IR	3	3	-	Ex.AT2G04800.1	-17.29	0.00164166	0.00252936	14.6341463414634|15.3846153846154|21.8390804597701	0|0|0	Chr2_1687617_1687788_R_Ex.AT2G04800.1_1
Chr5:23405370-23406352	AT5G57780	Chr5:23406012-23406238	IR	3	3	-	ONT.19049.2	-17.61	0.000615504	0.0046585	21.2121212121212|16|15.625	0|0|0	Chr5_23406012_23406238_R_ONT.19049.2_1
Chr1:1477529-1478878	ONT.2770	Chr1:1477816-1478720	IR	3	3	-	Ex.ONT.2770.42	-17.65	0.00476277	0.00498611	11.4285714285714|20.8333333333333|20.6896551724138	0|0|0	Chr1_1477816_1478720_R_Ex.ONT.2770.42_1
Chr4:18278857-18279843	AT4G39270	Chr4:18278996-18279162	IR (overlapping region)	3	3	-	Ex.ONT.13416.5	-17.76	0.000149042	0.000535747	17.6470588235294|15.625|20	0|0|0	Chr4_18278996_18279162_R_Ex.ONT.13416.5_1
Chr5:4041474-4042074	AT5G12440	Chr5:4041710-4042037	IR	3	3	-	Ex.ONT.17674.1	-17.87	8.73073e-06	0.000134478	16.6666666666667|18.75|18.1818181818182	0|0|0	Chr5_4041710_4042037_R_Ex.ONT.17674.1_1
Chr1:13468700-13469913	AT1G36070	Chr1:13469098-13469913	A5SS	3	3	-	ONT.3882.3	-17.9	0.006722	0.00702166	41.1764705882353|52.3809523809524|46.1538461538462	30.3571428571429|29.4117647058824|26.2295081967213	Chr1_13468700_13469913_S_ONT.3882.3_1
Chr1:3621421-3622272	ONT.392	Chr1:3621817-3622002	IR (overlapping region)	3	3	-	ONT.392.1	-17.92	0.00988387	0.0123675	11.6279069767442|17.1428571428571|25	0|0|0	Chr1_3621817_3622002_R_ONT.392.1_1
Chr2:9265253-9265893	AT2G21660	Chr2:9265503-9265697	IR	3	3	-	ONT.7034.2	-17.96	4.91212e-10	8.52991e-10	17.8891470295387|18.0623035152901|17.9143510951291	0|0|0	Chr2_9265503_9265697_R_ONT.7034.2_1
Chr2:9265253-9265893	AT2G21660	Chr2:9265485-9265721	IR	3	3	-	ONT.7034.2	-17.96	4.91212e-10	8.52991e-10	17.8891470295387|18.0623035152901|17.9143510951291	0|0|0	Chr2_9265485_9265721_R_ONT.7034.2_1
Chr3:22810065-22810725	AT3G61640	Chr3:22810393-22810514	IR	3	3	-	ONT.11896.2	-18.04	0.0014498	0.00310722	13.5294117647059|21.1538461538462|19.4444444444444	0|0|0	Chr3_22810393_22810514_R_ONT.11896.2_1
Chr1:1477551-1478875	ONT.2770	Chr1:1477792-1478699	IR	3	3	-	Ex.ONT.2770.48	-18.05	0.00122705	0.00128503	13.6363636363636|20.5128205128205|20	0|0|0	Chr1_1477792_1478699_R_Ex.ONT.2770.48_1
Chr1:1477479-1478879	ONT.2770	Chr1:1477790-1478699	IR	3	3	-	Ex.ONT.2770.18	-18.05	0.00122705	0.00128503	13.6363636363636|20.5128205128205|20	0|0|0	Chr1_1477790_1478699_R_Ex.ONT.2770.18_1
Chr2:9265253-9265893	AT2G21660	Chr2:9265491-9265685	IR	3	3	-	ONT.7034.2	-18.15	1.00711e-09	1.7481e-09	18.1336863004633|18.27251995439|18.0483028720627	0|0|0	Chr2_9265491_9265685_R_ONT.7034.2_1
Chr2:9265253-9265893	AT2G21660	Chr2:9265491-9265682	IR	3	3	-	ONT.7034.2	-18.15	1.00711e-09	1.7481e-09	18.1336863004633|18.27251995439|18.0483028720627	0|0|0	Chr2_9265491_9265682_R_ONT.7034.2_1
Chr2:9265253-9265893	AT2G21660	Chr2:9265485-9265664	IR	3	3	-	ONT.7034.2	-18.16	1.62853e-09	2.82649e-09	18.1878306878307|18.27251995439|18.0215475024486	0|0|0	Chr2_9265485_9265664_R_ONT.7034.2_1
Chr2:9265253-9265893	AT2G21660	Chr2:9265486-9265680	IR	3	3	-	ONT.7034.2	-18.2	3.01781e-09	5.23674e-09	18.1607674495534|18.3656036446469|18.0750407830343	0|0|0	Chr2_9265486_9265680_R_ONT.7034.2_1
Chr1:6265303-6266816	AT1G18200	Chr1:6265885-6266438	IR	3	3	-	ONT.3317.2	-18.24	0.00164088	0.00213911	13.8888888888889|18.6046511627907|22.2222222222222	0|0|0	Chr1_6265885_6266438_R_ONT.3317.2_1
Chr2:9265253-9265893	AT2G21660	Chr2:9265485-9265679	IR	3	3	-	ONT.7034.2	-18.25	8.32339e-10	1.44502e-09	18.2148760330579|18.3656036446469|18.155149934811	0|0|0	Chr2_9265485_9265679_R_ONT.7034.2_1
Chr1:1477476-1478874	ONT.2770	Chr1:1477790-1478739	IR	3	3	-	Ex.ONT.2770.16	-18.3	0.00189273	0.00198205	15.7894736842105|23.3333333333333|15.7894736842105	0|0|0	Chr1_1477790_1478739_R_Ex.ONT.2770.16_1
Chr1:20058699-20059411	ONT.4154	Chr1:20058914-20059002	IR (overlapping region)	3	3	-	ONT.4154.1	-18.32	0.00330961	0.00358791	16.6666666666667|14.2857142857143|24	0|0|0	Chr1_20058914_20059002_R_ONT.4154.1_1
Chr4:18276672-18279708	ONT.14901	Chr4:18279089-18279162	IR (overlapping region)	3	3	-	ONT.14901.1	-18.33	0.000177293	0.000642749	19.3548387096774|15.625|20	0|0|0	Chr4_18279089_18279162_R_ONT.14901.1_1
Chr3:21406496-21407525	AT3G57790	Chr3:21407217-21407458	IR	3	3	-	ONT.11763.1	-18.43	1.88239e-06	3.88114e-06	19.2982456140351|18.0327868852459|17.9487179487179	0|0|0	Chr3_21407217_21407458_R_ONT.11763.1_1
Chr4:7536989-7538279	AT4G12850	Chr4:7537204-7538081	IR	3	3	-	Ex.ONT.12340.2	-18.49	7.54546e-05	0.000302631	20.6896551724138|17.6470588235294|17.1428571428571	0|0|0	Chr4_7537204_7538081_R_Ex.ONT.12340.2_1
Chr1:22409647-22410498	AT1G60870	Chr1:22409915-22409986	IR (overlapping region)	3	3	-	ONT.1797.3	-18.96	0.000184621	0.000205967	17.1111111111111|17.9959100204499|21.7592592592593	0|0|0	Chr1_22409915_22409986_R_ONT.1797.3_1
Chr2:8695980-8697089	AT2G20142	Chr2:8696529-8696934	IR	3	3	-	ONT.5516.2	-19.07	9.08183e-05	0.000155126	21.2121212121212|17.0731707317073|18.9189189189189	0|0|0	Chr2_8696529_8696934_R_ONT.5516.2_1
Chr1:6712053-6714244	AT1G19400	Chr1:6712438-6712535	IR	3	3	-	ONT.3362.3	-19.11	0.000464786	0.000612563	15.8620689655172|22.1556886227545|19.3103448275862	0|0|0	Chr1_6712438_6712535_R_ONT.3362.3_1
Chr1:1477507-1478878	ONT.2770	Chr1:1477786-1478734	IR	3	3	-	Ex.ONT.2770.30	-19.13	0.00459672	0.00481241	15.7894736842105|25.8064516129032|15.7894736842105	0|0|0	Chr1_1477786_1478734_R_Ex.ONT.2770.30_1
Chr4:7595002-7595992	AT4G12990	Chr4:7595430-7595823	IR	3	3	-	ONT.13804.7	-19.44	1.14375e-05	4.58832e-05	18.1818181818182|20.6896551724138|19.4444444444444	0|0|0	Chr4_7595430_7595823_R_ONT.13804.7_1
Chr1:1477507-1478873	ONT.2770	Chr1:1477777-1478720	IR	3	3	-	Ex.ONT.2770.23	-19.45	0.000204075	0.000213821	17.0731707317073|22.2222222222222|19.047619047619	0|0|0	Chr1_1477777_1478720_R_Ex.ONT.2770.23_1
Chr3:20296232-20297184	AT3G54810	Chr3:20296400-20296928	IR	3	3	-	Ex.AT3G54810.2	-19.6	0.0010963	0.00214951	18.0645161290323|24.1830065359477|16.5562913907285	0|0|0	Chr3_20296400_20296928_R_Ex.AT3G54810.2_1
Chr5:8468338-8469262	ONT.18152	Chr5:8468673-8469107	IR	3	3	-	Ex.ONT.18152.4	-19.61	9.30266e-05	0.00661944	21.9367588932806|19.1756272401434|17.7121771217712	0|0|0	Chr5_8468673_8469107_R_Ex.ONT.18152.4_1
Chr5:8468336-8469242	ONT.18152	Chr5:8468673-8469014	IR	3	3	-	Ex.ONT.18152.3	-19.61	9.30266e-05	0.00661944	21.9367588932806|19.1756272401434|17.7121771217712	0|0|0	Chr5_8468673_8469014_R_Ex.ONT.18152.3_1
Chr3:5052731-5054942	AT3G15010	Chr3:5054063-5054605	IR	3	3	-	AT3G15010.2	-19.66	0.00707858	0.0166269	23.3644859813084|11.9205298013245|23.6842105263158	0|0|0	Chr3_5054063_5054605_R_AT3G15010.2_1
Chr2:9265253-9265893	AT2G21660	Chr2:9265491-9265559	IR	3	3	-	ONT.7034.2	-19.66	3.93897e-08	6.8336e-08	20.0129324280634|19.534100477126|19.44177093359	0|0|0	Chr2_9265491_9265559_R_ONT.7034.2_1
Chr2:12585792-12586289	ONT.7325	Chr2:12585794-12585879	IR (overlapping region)	3	3	-	ONT.7325.1	-19.67	1.19222e-05	1.70419e-05	21.0526315789474|18.5185185185185|19.4444444444444	0|0|0	Chr2_12585794_12585879_R_ONT.7325.1_1
Chr1:26161607-26162758	ONT.2123	Chr1:26161710-26161795	IR (overlapping region)	3	3	-	ONT.2123.4	-19.76	0.00270431	0.00313582	15.5555555555556|18.1818181818182|25.531914893617	0|0|0	Chr1_26161710_26161795_R_ONT.2123.4_1
Chr1:26161603-26162757	ONT.2123	Chr1:26161710-26161820	IR (overlapping region)	3	3	-	Ex.ONT.2123.2	-19.76	0.00270431	0.00313582	15.5555555555556|18.1818181818182|25.531914893617	0|0|0	Chr1_26161710_26161820_R_Ex.ONT.2123.2_1
Chr3:17197631-17199244	AT3G46690	Chr3:17198638-17198716	IR	3	3	-	ONT.11304.2	-19.93	0.00074182	0.00135649	20.253164556962|23.469387755102|16.0714285714286	0|0|0	Chr3_17198638_17198716_R_ONT.11304.2_1
Chr2:15165437-15166465	AT2G36120	Chr2:15165799-15166152	IR	3	3	-	AT2G36120.1	-20	0.000759362	0.00112883	16.0714285714286|20.4081632653061|23.5294117647059	0|0|0	Chr2_15165799_15166152_R_AT2G36120.1_1
Chr3:21715192-21715549	AT3G58710	Chr3:21715317-21715405	IR (overlapping region)	3	3	-	Ex.AT3G58710.2	-20.01	0.000798513	0.00166454	19.2307692307692|24.1379310344828|16.6666666666667	0|0|0	Chr3_21715317_21715405_R_Ex.AT3G58710.2_1
Chr3:21715052-21715549	AT3G58710	Chr3:21715321-21715405	IR (overlapping region)	3	3	-	Ex.ONT.9843.2	-20.01	0.000798513	0.00166454	19.2307692307692|24.1379310344828|16.6666666666667	0|0|0	Chr3_21715321_21715405_R_Ex.ONT.9843.2_1
Chr3:21715007-21715549	AT3G58710	Chr3:21715317-21715402	IR (overlapping region)	3	3	-	Ex.AT3G58710.1	-20.01	0.000798513	0.00166454	19.2307692307692|24.1379310344828|16.6666666666667	0|0|0	Chr3_21715317_21715402_R_Ex.AT3G58710.1_1
Chr4:7594986-7595992	AT4G12990	Chr4:7595536-7595823	IR	3	3	-	Ex.ONT.13804.6	-20.29	4.0814e-07	1.63767e-06	19.6428571428571|20.6896551724138|20.5479452054795	0|0|0	Chr4_7595536_7595823_R_Ex.ONT.13804.6_1
Chr5:22327240-22329187	AT5G55040	Chr5:22327459-22327537	IR	3	3	-	AT5G55040.1	-20.46	0.000579484	0.00410044	17.1428571428571|24.2424242424242|20	0|0|0	Chr5_22327459_22327537_R_AT5G55040.1_1
Chr4:18276672-18279708	ONT.14901	Chr4:18278990-18279150	IR (overlapping region)	3	3	-	ONT.14901.1	-20.48	1.74869e-06	6.34088e-06	21.4285714285714|20|20	0|0|0	Chr4_18278990_18279150_R_ONT.14901.1_1
Chr4:18276672-18279708	ONT.14901	Chr4:18278990-18279146	IR (overlapping region)	3	3	-	ONT.14901.1	-20.48	1.74869e-06	6.34088e-06	21.4285714285714|20|20	0|0|0	Chr4_18278990_18279146_R_ONT.14901.1_1
Chr4:18276672-18279708	ONT.14901	Chr4:18278986-18279065	IR (overlapping region)	3	3	-	ONT.14901.1	-20.48	1.74869e-06	6.34088e-06	21.4285714285714|20|20	0|0|0	Chr4_18278986_18279065_R_ONT.14901.1_1
Chr3:17200319-17201889	AT3G46700	Chr3:17201308-17201382	IR	3	3	-	ONT.11305.2	-20.48	0.00319871	0.00584886	17.8571428571429|26.9230769230769|16.6666666666667	0|0|0	Chr3_17201308_17201382_R_ONT.11305.2_1
Chr2:15165437-15166465	AT2G36120	Chr2:15165757-15166152	IR	3	3	-	AT2G36120.1	-20.98	0.000641665	0.00095402	17.5438596491228|20.4081632653061|25	0|0|0	Chr2_15165757_15166152_R_AT2G36120.1_1
Chr5:17961201-17962202	AT5G44568	Chr5:17961501-17962040	IR	3	3	-	Ex.AT5G44568.1	-21.19	9.18947e-05	0.000491461	18.673647469459|23.2198142414861|21.6666666666667	0|0|0	Chr5_17961501_17962040_R_Ex.AT5G44568.1_1
Chr1:1477508-1478879	ONT.2770	Chr1:1477774-1478720	IR	3	3	-	Ex.ONT.2770.39	-21.33	4.99889e-05	5.23851e-05	19.047619047619|22.2222222222222|22.7272727272727	0|0|0	Chr1_1477774_1478720_R_Ex.ONT.2770.39_1
Chr1:1477507-1478879	ONT.2770	Chr1:1477777-1478687	IR	3	3	-	Ex.ONT.2770.33	-21.33	4.99889e-05	5.23851e-05	19.047619047619|22.2222222222222|22.7272727272727	0|0|0	Chr1_1477777_1478687_R_Ex.ONT.2770.33_1
Chr4:7653692-7654967	AT4G13160	Chr4:7653701-7653876	IR	3	3	-	ONT.12350.2	-21.35	4.02784e-05	0.000162449	22.6415094339623|19.1780821917808|22.2222222222222	0|0|0	Chr4_7653701_7653876_R_ONT.12350.2_1
Chr3:5718086-5718921	ONT.10719	Chr3:5718318-5718446	IR (overlapping region)	3	3	-	ONT.10719.1	-21.52	0.000414315	0.00099936	24.5614035087719|17.7777777777778|22.2222222222222	0|0|0	Chr3_5718318_5718446_R_ONT.10719.1_1
Chr1:6266439-6266816	AT1G18200	Chr1:6266663-6266778	IR (overlapping region)	3	3	-	ONT.3317.1	-21.61	0.00707746	0.00922611	16.2162162162162|18.6046511627907|30	0|0|0	Chr1_6266663_6266778_R_ONT.3317.1_1
Chr1:11453634-11455313	AT1G31885	Chr1:11453643-11453713	IR (overlapping region)	3	3	-	ONT.1197.5	-21.74	0.00174646	0.00180199	15.9090909090909|25|24.3243243243243	0|0|0	Chr1_11453643_11453713_R_ONT.1197.5_1
Chr3:5052731-5054062	AT3G15010	Chr3:5053194-5053279	IR	3	3	-	AT3G15010.1	-21.85	0.00977291	0.0229527	25.4545454545455|12.5|27.5862068965517	0|0|0	Chr3_5053194_5053279_R_AT3G15010.1_1
Chr4:13307461-13308953	AT4G26288	Chr4:13307841-13307967	IR	3	3	-	Ex.AT4G26288.1	-22.05	0.00138637	0.00408768	17.741935483871|21.1267605633803|27.2727272727273	0|0|0	Chr4_13307841_13307967_R_Ex.AT4G26288.1_1
Chr3:5718086-5718921	ONT.10719	Chr3:5718177-5718255	IR (overlapping region)	3	3	-	ONT.10719.1	-22.24	0.000396955	0.000957549	24.5283018867925|18.1818181818182|24	0|0|0	Chr3_5718177_5718255_R_ONT.10719.1_1
Chr5:8947373-8948382	AT5G25630	Chr5:8947498-8947696	IR	3	3	-	ONT.15890.4	-22.27	4.1174e-05	0.00447679	21.3903743315508|24.5454545454545|20.8860759493671	0|0|0	Chr5_8947498_8947696_R_ONT.15890.4_1
Chr2:15165437-15166465	AT2G36120	Chr2:15165793-15166194	IR	3	3	-	AT2G36120.1	-22.6	6.47677e-05	9.63737e-05	20|23.8095238095238|24	0|0|0	Chr2_15165793_15166194_R_AT2G36120.1_1
Chr1:1477475-1478871	ONT.2770	Chr1:1477774-1478645	IR	3	3	-	Ex.ONT.2770.15	-22.98	0.000796012	0.000833884	19.047619047619|22.2222222222222|27.6595744680851	0|0|0	Chr1_1477774_1478645_R_Ex.ONT.2770.15_1
Chr1:2421218-2421943	AT1G07820	Chr1:2421784-2421902	IR	3	3	-	AT1G07820.1	-23	2.06187e-06	2.34549e-06	22.2543352601156|24.0932642487047|22.6628895184136	0|0|0	Chr1_2421784_2421902_R_AT1G07820.1_1
Chr1:20112701-20113121	AT1G53870	Chr1:20112983-20113064	IR	3	3	-	AT1G53870.1	-23.07	0.00929169	0.0100846	14.2857142857143|23.6842105263158|31.25	0|0|0	Chr1_20112983_20113064_R_AT1G53870.1_1
Chr1:20803704-20804573	AT1G55675	Chr1:20803961-20804551	IR	3	3	-	AT1G55675.1	-23.21	0.000194198	0.0002132	26.6666666666667|20.8333333333333|22.1374045801527	0|0|0	Chr1_20803961_20804551_R_AT1G55675.1_1
Chr1:1477507-1478874	ONT.2770	Chr1:1477786-1478645	IR	3	3	-	Ex.ONT.2770.25	-23.21	0.000168039	0.000176068	20|25.8064516129032|23.8095238095238	0|0|0	Chr1_1477786_1478645_R_Ex.ONT.2770.25_1
Chr5:4828642-4829049	AT5G14930	Chr5:4828774-4828925	IR	3	3	-	ONT.15498.1	-23.71	0.000507528	0.00915662	22.8915662650602|20.1754385964912|28.0487804878049	0|0|0	Chr5_4828774_4828925_R_ONT.15498.1_1
Chr1:1477479-1478882	ONT.2770	Chr1:1477795-1478655	IR	3	3	-	Ex.ONT.2770.19	-23.85	0.00110214	0.00115448	18.75|24.2424242424242|28.5714285714286	0|0|0	Chr1_1477795_1478655_R_Ex.ONT.2770.19_1
Chr3:9570326-9572003	ONT.11048	Chr3:9571061-9571145	IR	3	3	-	ONT.11048.2	-23.93	0.00779388	0.0205696	21.2121212121212|33.3333333333333|17.2413793103448	0|0|0	Chr3_9571061_9571145_R_ONT.11048.2_1
Chr3:5831253-5832419	AT3G17100	Chr3:5831384-5831465	IR	3	3	-	AT3G17100.1	-24	1.86175e-05	4.5081e-05	24.4897959183673|25.4464285714286|22.0532319391635	0|0|0	Chr3_5831384_5831465_R_AT3G17100.1_1
Chr5:8043843-8044819	AT5G23860	Chr5:8044576-8044735	IR (overlapping region)	3	3	-	AT5G23860.1	-24.24	0.000631964	0.0324875	22.5|29.1666666666667|21.0526315789474	0|0|0	Chr5_8044576_8044735_R_AT5G23860.1_1
Chr2:15165437-15166465	AT2G36120	Chr2:15165742-15166197	IR	3	3	-	AT2G36120.1	-24.27	4.36034e-05	6.48945e-05	21.7391304347826|25.5813953488372|25.4901960784314	0|0|0	Chr2_15165742_15166197_R_AT2G36120.1_1
Chr1:29331355-29333092	ONT.4996	Chr1:29332276-29332365	IR (overlapping region)	3	3	-	ONT.4996.1	-24.52	0.000926189	0.00112649	19|28|26.5625	0|0|0	Chr1_29332276_29332365_R_ONT.4996.1_1
Chr4:9545459-9546241	ONT.13983	Chr4:9545547-9546018	IR (overlapping region)	3	3	-	Ex.ONT.13983.2	-24.54	5.88636e-05	0.000255674	25|21.9512195121951|26.6666666666667	0|0|0	Chr4_9545547_9546018_R_Ex.ONT.13983.2_1
Chr5:2060504-2061954	AT5G06690	Chr5:2060750-2060871	IR	3	3	-	ONT.17451.3	-24.62	0.0018344	0.0114155	22.7272727272727|20|31.1475409836066	0|0|0	Chr5_2060750_2060871_R_ONT.17451.3_1
Chr1:27439452-27440464	AT1G72930	Chr1:27439974-27440071	IR	3	3	-	Ex.AT1G72930.2	-24.64	0.00123745	0.00146523	20.9375|22.3404255319149|30.6338028169014	0|0|0	Chr1_27439974_27440071_R_Ex.AT1G72930.2_1
Chr1:1477476-1478884	ONT.2770	Chr1:1477795-1478652	IR	3	3	-	Ex.ONT.2770.17	-24.68	0.000320388	0.000335679	21.2121212121212|24.2424242424242|28.5714285714286	0|0|0	Chr1_1477795_1478652_R_Ex.ONT.2770.17_1
Chr3:16945364-16945750	AT3G46130	Chr3:16945583-16945620	IR	3	3	-	AT3G46130.2	-24.75	3.59153e-07	6.57071e-07	24.5989304812834|25.4901960784314|24.1758241758242	0|0|0	Chr3_16945583_16945620_R_AT3G46130.2_1
Chr1:27439452-27440464	AT1G72930	Chr1:27439931-27440071	IR	3	3	-	Ex.AT1G72930.1	-24.79	0.00129474	0.00153301	20.9375|22.5464190981432|30.8771929824561	0|0|0	Chr1_27439931_27440071_R_Ex.AT1G72930.1_1
Chr1:29331355-29333092	ONT.4996	Chr1:29331987-29332084	IR (overlapping region)	3	3	-	ONT.4996.1	-24.8	0.00093108	0.00113241	19.1919191919192|28.2258064516129|26.984126984127	0|0|0	Chr1_29331987_29332084_R_ONT.4996.1_1
Chr2:16537459-16538279	ONT.7752	Chr2:16537638-16538106	IR	3	3	-	ONT.7752.2	-25	0.000183524	0.000281234	28.5714285714286|24.1935483870968|22.2222222222222	0|0|0	Chr2_16537638_16538106_R_ONT.7752.2_1
Chr3:17065489-17066067	ONT.11291	Chr3:17065893-17065995	IR	3	3	-	Ex.ONT.11291.3	-25.01	0.000578981	0.00106151	28|20|27.027027027027	0|0|0	Chr3_17065893_17065995_R_Ex.ONT.11291.3_1
Chr3:17065484-17066067	ONT.11291	Chr3:17065796-17065995	IR	3	3	-	Ex.ONT.11291.2	-25.01	0.000578981	0.00106151	28|20|27.027027027027	0|0|0	Chr3_17065796_17065995_R_Ex.ONT.11291.2_1
Chr3:16945364-16945750	AT3G46130	Chr3:16945551-16945620	IR	3	3	-	AT3G46130.2	-25.01	8.42067e-07	1.54041e-06	25|25.8536585365854|24.1758241758242	0|0|0	Chr3_16945551_16945620_R_AT3G46130.2_1
Chr2:17073908-17074164	AT2G40920	Chr2:17073953-17073968	IR	3	3	-	AT2G40920.1	-25.05	0.000109971	0.000170155	25|27.9411764705882|22.2222222222222	0|0|0	Chr2_17073953_17073968_R_AT2G40920.1_1
Chr1:4575778-4576621	AT1G13350	Chr1:4575996-4576238	IR	3	3	-	ONT.3106.3	-25.62	0.000660793	0.000837932	21.0526315789474|25.4901960784314|30.3030303030303	0|0|0	Chr1_4575996_4576238_R_ONT.3106.3_1
Chr1:1907142-1909652	AT1G06230	Chr1:1907170-1907275	IR	3	3	-	ONT.209.5	-25.68	0.00278183	0.00296851	33.3333333333333|23.2558139534884|20.4545454545455	0|0|0	Chr1_1907170_1907275_R_ONT.209.5_1
Chr1:1907079-1909722	AT1G06230	Chr1:1907170-1907280	IR	3	3	-	Ex.ONT.209.2	-25.68	0.00278183	0.00296851	33.3333333333333|23.2558139534884|20.4545454545455	0|0|0	Chr1_1907170_1907280_R_Ex.ONT.209.2_1
Chr1:1477507-1478878	ONT.2770	Chr1:1477744-1478699	IR	3	3	-	Ex.ONT.2770.29	-25.82	0.000580744	0.000608392	24|22.5|30.952380952381	0|0|0	Chr1_1477744_1478699_R_Ex.ONT.2770.29_1
Chr1:1477507-1478874	ONT.2770	Chr1:1477744-1478703	IR	3	3	-	Ex.ONT.2770.26	-25.82	0.000580744	0.000608392	24|22.5|30.952380952381	0|0|0	Chr1_1477744_1478703_R_Ex.ONT.2770.26_1
Chr4:16186887-16189007	AT4G33740	Chr4:16186955-16187361	IR	3	3	-	Ex.AT4G33740.1	-25.86	0.000229596	0.000762817	22.1153846153846|29.2|26.271186440678	0|0|0	Chr4_16186955_16187361_R_Ex.AT4G33740.1_1
Chr4:16186830-16189007	AT4G33740	Chr4:16186955-16187358	IR	3	3	-	Ex.AT4G33740.2	-25.86	0.000229596	0.000762817	22.1153846153846|29.2|26.271186440678	0|0|0	Chr4_16186955_16187358_R_Ex.AT4G33740.2_1
Chr1:29331355-29333092	ONT.4996	Chr1:29331486-29331572	IR (overlapping region)	3	3	-	ONT.4996.1	-25.97	0.00129672	0.00157696	19.5876288659794|30|28.3333333333333	0|0|0	Chr1_29331486_29331572_R_ONT.4996.1_1
Chr1:24244376-24244991	AT1G65270	Chr1:24244537-24244794	IR	3	3	-	Ex.AT1G65270.1	-26	0.000319591	0.000363856	26.6211604095563|29.5454545454545|21.830985915493	0|0|0	Chr1_24244537_24244794_R_Ex.AT1G65270.1_1
Chr1:24244376-24244964	AT1G65270	Chr1:24244537-24244800	IR	3	3	-	Ex.ONT.1959.3	-26	0.000319591	0.000363856	26.6211604095563|29.5454545454545|21.830985915493	0|0|0	Chr1_24244537_24244800_R_Ex.ONT.1959.3_1
Chr5:2060504-2061954	AT5G06690	Chr5:2060750-2060957	IR	3	3	-	ONT.17451.3	-26.06	0.00141104	0.00878244	25|20.9302325581395|32.258064516129	0|0|0	Chr5_2060750_2060957_R_ONT.17451.3_1
Chr1:24244376-24244743	AT1G65270	Chr1:24244537-24244645	IR	3	3	-	AT1G65270.2	-26.09	0.000271441	0.000309055	26.6211604095563|29.5454545454545|22.1052631578947	0|0|0	Chr1_24244537_24244645_R_AT1G65270.2_1
Chr3:19323346-19324469	AT3G52105	Chr3:19323614-19324168	IR	3	3	-	Ex.ONT.9587.3	-26.31	1.59224e-05	3.04305e-05	24.2424242424242|27.7777777777778|26.9230769230769	0|0|0	Chr3_19323614_19324168_R_Ex.ONT.9587.3_1
Chr3:9578286-9580053	AT3G26180	Chr3:9579019-9579096	IR	3	3	-	ONT.11050.2	-26.39	0.00147773	0.0039017	29.0909090909091|19.6428571428571|30.4347826086957	0|0|0	Chr3_9579019_9579096_R_ONT.11050.2_1
Chr1:7421238-7423192	AT1G21200	Chr1:7421273-7421463	IR	3	3	-	ONT.839.2	-26.57	0.000630317	0.00083737	30.7692307692308|27.5|21.4285714285714	0|0|0	Chr1_7421273_7421463_R_ONT.839.2_1
Chr1:5430386-5431003	ONT.603	Chr1:5430654-5430822	IR (overlapping region)	3	3	-	ONT.603.1	-26.67	0.00635226	0.00816836	36.6666666666667|20|23.3333333333333	0|0|0	Chr1_5430654_5430822_R_ONT.603.1_1
Chr1:4575778-4576621	AT1G13350	Chr1:4576048-4576238	IR	3	3	-	ONT.3106.3	-26.77	0.000213188	0.000270356	23.0769230769231|26.9230769230769|30.3030303030303	0|0|0	Chr1_4576048_4576238_R_ONT.3106.3_1
Chr1:21742944-21743947	ONT.4293	Chr1:21743299-21743482	IR	3	3	-	ONT.4293.2	-26.92	0.00653338	0.00723143	30.7692307692308|33.3333333333333|16.6666666666667	0|0|0	Chr1_21743299_21743482_R_ONT.4293.2_1
Chr1:21742944-21743947	ONT.4293	Chr1:21743287-21743482	IR	3	3	-	ONT.4293.2	-26.92	0.00653338	0.00723143	30.7692307692308|33.3333333333333|16.6666666666667	0|0|0	Chr1_21743287_21743482_R_ONT.4293.2_1
Chr5:26399526-26400974	AT5G66010	Chr5:26399629-26400079	IR	3	3	-	ONT.17160.1	-27.08	0.000598516	0.00646752	25.8064516129032|32.3529411764706|23.0769230769231	0|0|0	Chr5_26399629_26400079_R_ONT.17160.1_1
Chr5:26399526-26400974	AT5G66010	Chr5:26399629-26400002	IR	3	3	-	ONT.17160.1	-27.08	0.000598516	0.00646752	25.8064516129032|32.3529411764706|23.0769230769231	0|0|0	Chr5_26399629_26400002_R_ONT.17160.1_1
Chr5:26564490-26566771	ONT.19426	Chr5:26566011-26566092	IR (overlapping region)	3	3	-	ONT.19426.1	-27.17	0.00952012	0.107309	25.6410256410256|17.9487179487179|37.9310344827586	0|0|0	Chr5_26566011_26566092_R_ONT.19426.1_1
Chr4:12566601-12568845	AT4G24230	Chr4:12567145-12567237	IR	3	3	-	ONT.14264.1	-27.25	0.000761182	0.00217694	31.8181818181818|28.2051282051282|21.7391304347826	0|0|0	Chr4_12567145_12567237_R_ONT.14264.1_1
Chr4:13539617-13540274	AT4G26965	Chr4:13539833-13540217	IR	3	3	-	Ex.AT4G26965.2	-27.39	8.54507e-05	0.000254187	25.8064516129032|25.5813953488372|30.7692307692308	0|0|0	Chr4_13539833_13540217_R_Ex.AT4G26965.2_1
Chr2:19319783-19320992	ONT.6572	Chr2:19320285-19320541	IR (overlapping region)	3	3	-	ONT.6572.1	-27.43	0.00855061	0.0137519	24.390243902439|19.4444444444444|38.4615384615385	0|0|0	Chr2_19320285_19320541_R_ONT.6572.1_1
Chr3:16945364-16945750	AT3G46130	Chr3:16945493-16945620	IR	3	3	-	AT3G46130.2	-27.46	1.04151e-06	1.90516e-06	27.319587628866|26.5700483091787|28.4974093264249	0|0|0	Chr3_16945493_16945620_R_AT3G46130.2_1
Chr1:24306667-24307501	AT1G65440	Chr1:24307236-24307287	IR	3	3	-	AT1G65440.1	-27.55	1.34794e-05	1.53525e-05	26.0869565217391|26.9230769230769|29.6296296296296	0|0|0	Chr1_24307236_24307287_R_AT1G65440.1_1
Chr3:5337548-5338556	AT3G15760	Chr3:5337897-5337974	IR	3	3	-	ONT.8715.2	-27.65	4.05201e-06	9.65561e-06	28.1818181818182|26.0869565217391|28.6764705882353	0|0|0	Chr3_5337897_5337974_R_ONT.8715.2_1
Chr2:1877685-1878219	AT2G05185	Chr2:1877798-1877970	IR	3	3	-	AT2G05185.1	-27.69	0.00423245	0.00678071	28|19.3548387096774|35.7142857142857	0|0|0	Chr2_1877798_1877970_R_AT2G05185.1_1
Chr2:1877685-1878219	AT2G05185	Chr2:1877798-1877937	IR	3	3	-	AT2G05185.1	-27.69	0.00423245	0.00678071	28|19.3548387096774|35.7142857142857	0|0|0	Chr2_1877798_1877937_R_AT2G05185.1_1
Chr1:29805551-29809514	ONT.5051	Chr1:29806726-29806802	IR	3	3	-	ONT.5051.3	-27.77	0.00882296	0.0108096	39.0625|19.672131147541|24.5901639344262	0|0|0	Chr1_29806726_29806802_R_ONT.5051.3_1
Chr1:29805551-29806725	ONT.5051	Chr1:29806575-29806660	IR	3	3	-	ONT.5051.1	-27.77	0.00882296	0.0108096	39.0625|19.672131147541|24.5901639344262	0|0|0	Chr1_29806575_29806660_R_ONT.5051.1_1
Chr1:28041723-28042989	AT1G74650	Chr1:28041853-28042043	IR	3	3	-	ONT.2341.3	-27.8	0.00135883	0.00162135	34.2465753424658|22.2222222222222|26.9230769230769	0|0|0	Chr1_28041853_28042043_R_ONT.2341.3_1
Chr5:26564490-26566771	ONT.19426	Chr5:26564581-26564681	IR (overlapping region)	3	3	-	ONT.19426.1	-28.17	0.00590198	0.0665467	25|21.0526315789474|38.4615384615385	0|0|0	Chr5_26564581_26564681_R_ONT.19426.1_1
Chr1:28484844-28485955	AT1G75860	Chr1:28485163-28485662	IR	3	3	-	ONT.4902.2	-28.34	0.00287576	0.00345246	29.0909090909091|20.4545454545455|35.4838709677419	0|0|0	Chr1_28485163_28485662_R_ONT.4902.2_1
Chr3:21219008-21220485	AT3G57340	Chr3:21219037-21219142	IR	3	3	-	AT3G57340.2	-28.36	0.000769429	0.00158005	25|25.5813953488372|34.5070422535211	0|0|0	Chr3_21219037_21219142_R_AT3G57340.2_1
Chr1:1477507-1478879	ONT.2770	Chr1:1477805-1478739	IR	3	3	-	Ex.ONT.2770.35	-28.38	0.000117326	0.000122936	25|31.5789473684211|28.5714285714286	0|0|0	Chr1_1477805_1478739_R_Ex.ONT.2770.35_1
Chr2:8695374-8696052	AT2G20142	Chr2:8695839-8695979	IR	3	3	-	Ex.AT2G20142.1	-28.47	5.25875e-05	8.98371e-05	31.3725490196078|28|26.0416666666667	0|0|0	Chr2_8695839_8695979_R_Ex.AT2G20142.1_1
Chr2:8695370-8697094	AT2G20142	Chr2:8695839-8696149	IR	3	3	-	ONT.5516.3	-28.47	5.25875e-05	8.98371e-05	31.3725490196078|28|26.0416666666667	0|0|0	Chr2_8695839_8696149_R_ONT.5516.3_1
Chr1:27432199-27433774	AT1G72900	Chr1:27432680-27432904	IR	3	3	-	ONT.2266.1	-28.52	0.00035663	0.00042229	27.4809160305344|24.7311827956989|33.3333333333333	0|0|0	Chr1_27432680_27432904_R_ONT.2266.1_1
Chr1:5042588-5044294	AT1G14685	Chr1:5042856-5043076	IR	3	3	-	Ex.AT1G14685.2	-28.67	9.04459e-05	0.000115655	32.2222222222222|27.3684210526316|26.4150943396226	0|0|0	Chr1_5042856_5043076_R_Ex.AT1G14685.2_1
Chr1:1477461-1478874	ONT.2770	Chr1:1477732-1478699	IR	3	3	-	Ex.ONT.2770.4	-28.68	0.000377584	0.000395582	28.3018867924528|24.390243902439|33.3333333333333	0|0|0	Chr1_1477732_1478699_R_Ex.ONT.2770.4_1
Chr2:8695980-8696643	AT2G20142	Chr2:8696053-8696149	IR	3	3	-	Ex.AT2G20142.1	-28.71	4.85778e-05	8.29948e-05	31.3725490196078|28.7234042553192|26.0416666666667	0|0|0	Chr2_8696053_8696149_R_Ex.AT2G20142.1_1
Chr4:13539642-13540274	AT4G26965	Chr4:13539829-13540217	IR	3	3	-	Ex.AT4G26965.1	-28.74	0.000141927	0.00042215	28.125|25.5813953488372|32.5	0|0|0	Chr4_13539829_13540217_R_Ex.AT4G26965.1_1
Chr3:17065848-17066571	ONT.11291	Chr3:17066068-17066317	IR	3	3	-	Ex.ONT.11291.4	-28.79	1.20241e-05	2.20485e-05	30.7692307692308|28.5714285714286|27.027027027027	0|0|0	Chr3_17066068_17066317_R_Ex.ONT.11291.4_1
Chr3:9579097-9580086	AT3G26180	Chr3:9579256-9579657	IR	3	3	-	AT3G26180.1	-28.83	0.000385483	0.00101788	30.3571428571429|23.728813559322|32.3943661971831	0|0|0	Chr3_9579256_9579657_R_AT3G26180.1_1
Chr1:27119208-27119676	AT1G72070	Chr1:27119271-27119413	IR	3	3	-	ONT.4752.2	-29.19	0.00025942	0.000305954	33.8983050847458|26.0869565217391|27.5862068965517	0|0|0	Chr1_27119271_27119413_R_ONT.4752.2_1
Chr1:21742944-21743947	ONT.4293	Chr1:21743610-21743756	IR	3	3	-	ONT.4293.2	-29.21	0.00348757	0.00386042	34.5238095238095|33.3333333333333|19.7802197802198	0|0|0	Chr1_21743610_21743756_R_ONT.4293.2_1
Chr4:12566601-12568845	AT4G24230	Chr4:12567133-12567237	IR	3	3	-	ONT.14264.1	-29.22	0.00189254	0.00541172	30.4347826086957|35.4838709677419|21.7391304347826	0|0|0	Chr4_12567133_12567237_R_ONT.14264.1_1
Chr4:12566601-12568845	AT4G24230	Chr4:12567133-12567208	IR	3	3	-	ONT.14264.1	-29.22	0.00189254	0.00541172	30.4347826086957|35.4838709677419|21.7391304347826	0|0|0	Chr4_12567133_12567208_R_ONT.14264.1_1
Chr2:8695370-8697094	AT2G20142	Chr2:8695839-8695950	IR	3	3	-	ONT.5516.3	-29.39	8.54207e-05	0.000145914	32.9896907216495|28|27.1739130434783	0|0|0	Chr2_8695839_8695950_R_ONT.5516.3_1
Chr2:17948798-17949073	AT2G43160	Chr2:17948919-17949021	IR	3	3	-	Ex.AT2G43160.1	-29.47	7.47503e-05	0.000117504	25.990099009901|30.7228915662651|31.6901408450704	0|0|0	Chr2_17948919_17949021_R_Ex.AT2G43160.1_1
Chr1:29805551-29806725	ONT.5051	Chr1:29806065-29806165	IR	3	3	-	ONT.5051.1	-29.92	0.00164118	0.00201091	37.0967741935484|23.4375|29.2307692307692	0|0|0	Chr1_29806065_29806165_R_ONT.5051.1_1
Chr2:17948084-17948918	AT2G43160	Chr2:17948271-17948815	IR	3	3	-	Ex.AT2G43160.2	-30.34	7.12863e-05	0.000112063	26.7813267813268|31.7554240631164|32.4825986078886	0|0|0	Chr2_17948271_17948815_R_Ex.AT2G43160.2_1
Chr2:17948067-17948918	AT2G43160	Chr2:17948271-17948826	IR	3	3	-	Ex.AT2G43160.3	-30.34	7.12863e-05	0.000112063	26.7813267813268|31.7554240631164|32.4825986078886	0|0|0	Chr2_17948271_17948826_R_Ex.AT2G43160.3_1
Chr1:30022260-30022981	AT1G79820	Chr1:30022603-30022834	IR	3	3	-	Ex.AT1G79820.4	-30.45	0.000755766	0.000930575	36.3636363636364|30|25	0|0|0	Chr1_30022603_30022834_R_Ex.AT1G79820.4_1
Chr1:21742944-21743947	ONT.4293	Chr1:21743610-21743760	IR	3	3	-	ONT.4293.2	-30.67	0.00263964	0.00292193	36.046511627907|34.453781512605|21.505376344086	0|0|0	Chr1_21743610_21743760_R_ONT.4293.2_1
Chr1:23181426-23183208	AT1G62610	Chr1:23182362-23182684	IR	3	3	-	ONT.4402.1	-30.82	0.00638253	0.00717872	38.4615384615385|34.7826086956522|19.2307692307692	0|0|0	Chr1_23182362_23182684_R_ONT.4402.1_1
Chr1:23181426-23183208	AT1G62610	Chr1:23182359-23182684	IR	3	3	-	ONT.4402.1	-30.82	0.00638253	0.00717872	38.4615384615385|34.7826086956522|19.2307692307692	0|0|0	Chr1_23182359_23182684_R_ONT.4402.1_1
Chr1:23181426-23183208	AT1G62610	Chr1:23182356-23182684	IR	3	3	-	ONT.4402.1	-30.82	0.00638253	0.00717872	38.4615384615385|34.7826086956522|19.2307692307692	0|0|0	Chr1_23182356_23182684_R_ONT.4402.1_1
ChrM:146328-288108	ATMG01120	ChrM:147049-287916	IR	3	3	-	Ex.ONT.19567.1	-30.99	0.00508576	1	20.8333333333333|32.1428571428571|40	0|0|0	ChrM_147049_287916_R_Ex.ONT.19567.1_1
Chr3:21757499-21758714	AT3G58840	Chr3:21758464-21758681	IR	3	3	-	Ex.AT3G58840.2	-31.05	0.000248927	0.000519047	35.4838709677419|26.7605633802817|30.9090909090909	0|0|0	Chr3_21758464_21758681_R_Ex.AT3G58840.2_1
Chr5:4691378-4691896	AT5G14550	Chr5:4691593-4691746	IR (overlapping region)	3	3	-	AT5G14550.2	-31.18	0.000342437	0.00601328	25.974025974026|35.2941176470588|32.258064516129	0|0|0	Chr5_4691593_4691746_R_AT5G14550.2_1
Chr2:15165437-15166465	AT2G36120	Chr2:15165709-15166158	IR	3	3	-	AT2G36120.1	-31.27	0.000732749	0.00108936	24.5901639344262|35.0649350649351|34.1463414634146	0|0|0	Chr2_15165709_15166158_R_AT2G36120.1_1
Chr4:9545033-9545813	ONT.12509	Chr4:9545225-9545458	IR (overlapping region)	3	3	-	ONT.12509.1	-31.57	0.0039414	0.0171175	27.027027027027|25.5813953488372|42.1052631578947	0|0|0	Chr4_9545225_9545458_R_ONT.12509.1_1
Chr1:845952-847683	AT1G03410	Chr1:846478-846729	IR	3	3	-	AT1G03410.1	-31.84	0.000543529	0.000732797	38.0952380952381|28|29.4117647058824	0|0|0	Chr1_846478_846729_R_AT1G03410.1_1
Chr1:25137172-25137932	ONT.4565	Chr1:25137663-25137893	IR	3	3	-	ONT.4565.2	-31.91	0.000155683	0.000178869	34.6938775510204|27.3504273504274|33.6734693877551	0|0|0	Chr1_25137663_25137893_R_ONT.4565.2_1
Chr1:11453714-11455181	ONT.1197	Chr1:11453750-11454507	IR (overlapping region)	3	3	-	ONT.1197.4	-32.3	0.00141028	0.00145525	24.4444444444444|38.2978723404255|34.1463414634146	0|0|0	Chr1_11453750_11454507_R_ONT.1197.4_1
Chr1:25137172-25137932	ONT.4565	Chr1:25137663-25137843	IR	3	3	-	ONT.4565.2	-32.33	0.000132927	0.000152729	35.3535353535354|27.9661016949153|33.6734693877551	0|0|0	Chr1_25137663_25137843_R_ONT.4565.2_1
Chr1:11453714-11455181	ONT.1197	Chr1:11453750-11454511	IR (overlapping region)	3	3	-	ONT.1197.4	-32.82	0.00151831	0.00156663	24.4444444444444|38.2978723404255|35.7142857142857	0|0|0	Chr1_11453750_11454511_R_ONT.1197.4_1
Chr1:18175032-18176022	AT1G49130	Chr1:18175799-18175902	IR	3	3	-	AT1G49130.2	-32.93	8.46737e-05	9.00848e-05	29.0909090909091|33.695652173913|36	0|0|0	Chr1_18175799_18175902_R_AT1G49130.2_1
Chr2:6518888-6519921	AT2G15050	Chr2:6519247-6519878	IR	3	3	-	Ex.AT2G15050.3	-33.12	1.74318e-06	2.90588e-06	33.0677290836653|34.4827586206897|31.8181818181818	0|0|0	Chr2_6519247_6519878_R_Ex.AT2G15050.3_1
Chr2:6518840-6520160	AT2G15050	Chr2:6519226-6519878	IR	3	3	-	Ex.AT2G15050.2	-33.19	2.34321e-06	3.90595e-06	33.0677290836653|34.6875|31.8181818181818	0|0|0	Chr2_6519226_6519878_R_Ex.AT2G15050.2_1
Chr2:5864894-5865603	ONT.6809	Chr2:5865237-5865318	IR	3	3	-	ONT.6809.2	-33.41	0.00155671	0.00257974	28.5714285714286|42.1052631578947|29.5454545454545	0|0|0	Chr2_5865237_5865318_R_ONT.6809.2_1
Chr5:22751493-22752732	AT5G56210	Chr5:22751752-22752569	IR	3	3	-	AT5G56210.1	-33.79	0.00295703	0.0216428	32.0754716981132|43.5897435897436|25.7142857142857	0|0|0	Chr5_22751752_22752569_R_AT5G56210.1_1
Chr2:15165437-15166465	AT2G36120	Chr2:15165699-15166158	IR	3	3	-	AT2G36120.1	-34.24	0.00011873	0.000176584	30.3030303030303|38.2716049382716|34.1463414634146	0|0|0	Chr2_15165699_15166158_R_AT2G36120.1_1
Chr1:29331355-29333092	ONT.4996	Chr1:29332452-29332544	IR (overlapping region)	3	3	-	ONT.4996.1	-35.25	0.00101597	0.00123561	27.027027027027|39.4736842105263|39.2405063291139	0|0|0	Chr1_29332452_29332544_R_ONT.4996.1_1
Chr2:15165437-15166465	AT2G36120	Chr2:15165709-15166149	IR	3	3	-	AT2G36120.1	-35.34	0.00316561	0.00470508	24.1935483870968|40.9090909090909|40.9090909090909	0|0|0	Chr2_15165709_15166149_R_AT2G36120.1_1
Chr4:13361964-13364393	AT4G26450	Chr4:13362432-13362547	IR	3	3	-	Ex.ONT.12875.3	-35.97	0.000174776	0.000516192	34.0659340659341|32.6086956521739|41.2371134020619	0|0|0	Chr4_13362432_13362547_R_Ex.ONT.12875.3_1
Chr3:18862058-18863228	ONT.9521	Chr3:18862738-18862822	IR (overlapping region)	3	3	-	ONT.9521.1	-36.1	1.37305e-06	2.58991e-06	36.3636363636364|34.6153846153846|37.3134328358209	0|0|0	Chr3_18862738_18862822_R_ONT.9521.1_1
Chr5:25737204-25738602	AT5G64360	Chr5:25737609-25737734	IR	3	3	-	AT5G64360.2	-36.2	0.00118232	0.0114291	42.8571428571429|27.906976744186|37.8378378378378	0|0|0	Chr5_25737609_25737734_R_AT5G64360.2_1
Chr4:13361967-13364393	AT4G26450	Chr4:13362276-13362547	IR	3	3	-	Ex.ONT.12875.4	-36.21	0.000136578	0.000403407	34.0659340659341|33.3333333333333|41.2371134020619	0|0|0	Chr4_13362276_13362547_R_Ex.ONT.12875.4_1
Chr1:2444066-2444549	AT1G07920	Chr1:2444156-2444433	IR (overlapping region)	3	3	-	Ex.ONT.272.4	-36.68	0.000116962	0.000133462	40.7407407407407|37.037037037037|32.258064516129	0|0|0	Chr1_2444156_2444433_R_Ex.ONT.272.4_1
Chr5:13857921-13858623	AT5G35680	Chr5:13858151-13858202	IR	3	3	-	AT5G35680.2	-36.84	0.00957852	0.0447641	29.5081967213115|52.6315789473684|28.3783783783784	0|0|0	Chr5_13858151_13858202_R_AT5G35680.2_1
Chr1:2395445-2397379	ONT.265	Chr1:2396435-2396528	IR (overlapping region)	3	3	-	ONT.265.2	-37.1	0.00341948	0.00387835	29.5454545454545|32.8571428571429|48.8888888888889	0|0|0	Chr1_2396435_2396528_R_ONT.265.2_1
Chr2:10125368-10127521	AT2G23790	Chr2:10126151-10126903	IR	3	3	-	Ex.AT2G23790.1	-37.32	0.00992164	0.01369	29.6875|53.4883720930233|28.7878787878788	0|0|0	Chr2_10126151_10126903_R_Ex.AT2G23790.1_1
Chr1:16784148-16786739	ONT.3910	Chr1:16786319-16786388	IR (overlapping region)	3	3	-	ONT.3910.1	-37.48	0.00564627	0.0059528	50|36.3636363636364|26.0869565217391	0|0|0	Chr1_16786319_16786388_R_ONT.3910.1_1
Chr1:16784148-16786739	ONT.3910	Chr1:16786292-16786374	IR (overlapping region)	3	3	-	ONT.3910.1	-37.48	0.00564627	0.0059528	50|36.3636363636364|26.0869565217391	0|0|0	Chr1_16786292_16786374_R_ONT.3910.1_1
Chr2:15165437-15166465	AT2G36120	Chr2:15165619-15166116	IR	3	3	-	AT2G36120.1	-37.82	0.0003949	0.000587157	32.8125|36.2068965517241|44.4444444444444	0|0|0	Chr2_15165619_15166116_R_AT2G36120.1_1
Chr1:29220380-29221734	AT1G77740	Chr1:29220575-29220594	IR	3	3	-	ONT.2461.2	-37.92	4.93229e-05	5.98733e-05	40.9090909090909|38.8349514563107|34.020618556701	0|0|0	Chr1_29220575_29220594_R_ONT.2461.2_1
Chr4:12566601-12568845	AT4G24230	Chr4:12567126-12567237	IR	3	3	-	ONT.14264.1	-37.96	0.00629929	0.0180073	38.8888888888889|50|25	0|0|0	Chr4_12567126_12567237_R_ONT.14264.1_1
Chr3:10576513-10577248	AT3G28310	Chr3:10576581-10576949	IR (overlapping region)	3	3	-	Ex.ONT.9232.2	-38.03	0.00022046	0.000389136	35.2941176470588|34.7826086956522|44	0|0|0	Chr3_10576581_10576949_R_Ex.ONT.9232.2_1
Chr2:15165437-15166465	AT2G36120	Chr2:15165646-15166154	IR	3	3	-	AT2G36120.1	-38.08	9.38972e-05	0.000139673	39.7435897435897|41.1764705882353|33.3333333333333	0|0|0	Chr2_15165646_15166154_R_AT2G36120.1_1
Chr5:2204248-2205715	AT5G07100	Chr5:2204540-2204629	IR	3	3	-	ONT.15208.4	-38.12	0.000745221	0.0051856	44.4444444444444|39.4736842105263|30.4347826086957	0|0|0	Chr5_2204540_2204629_R_ONT.15208.4_1
Chr2:6518843-6520619	AT2G15050	Chr2:6519226-6520241	IR	3	3	-	Ex.ONT.5344.4	-38.25	6.33465e-10	1.05603e-09	38.4615384615385|38.2488479262673|38.0368098159509	0|0|0	Chr2_6519226_6520241_R_Ex.ONT.5344.4_1
Chr1:6969909-6970953	AT1G20100	Chr1:6970180-6970618	IR	3	3	-	ONT.3386.2	-38.36	0.000275855	0.000364631	43.0555555555556|32.258064516129|39.7590361445783	0|0|0	Chr1_6970180_6970618_R_ONT.3386.2_1
Chr2:11721532-11722467	ONT.7257	Chr2:11721729-11722300	IR	3	3	-	ONT.7257.2	-38.49	0.00134598	0.00190221	42.3076923076923|44.2622950819672|28.8888888888889	0|0|0	Chr2_11721729_11722300_R_ONT.7257.2_1
Chr2:15165437-15166465	AT2G36120	Chr2:15165619-15166119	IR	3	3	-	AT2G36120.1	-38.53	0.000247621	0.00036819	33.8461538461538|37.2881355932203|44.4444444444444	0|0|0	Chr2_15165619_15166119_R_AT2G36120.1_1
Chr1:27118621-27119270	AT1G72070	Chr1:27118974-27119207	IR (overlapping region)	3	3	-	Ex.AT1G72070.1	-38.63	0.000475017	0.000560206	45.0704225352113|38.5542168674699|32.258064516129	0|0|0	Chr1_27118974_27119207_R_Ex.AT1G72070.1_1
Chr2:15165437-15166465	AT2G36120	Chr2:15165696-15166149	IR	3	3	-	AT2G36120.1	-38.69	0.000654553	0.000973143	30.8823529411765|44.2857142857143|40.9090909090909	0|0|0	Chr2_15165696_15166149_R_AT2G36120.1_1
Chr3:21397684-21398820	AT3G57770	Chr3:21398301-21398370	IR	3	3	-	ONT.9816.2	-38.74	0.00489779	0.0100972	32.1428571428571|52.5|31.5789473684211	0|0|0	Chr3_21398301_21398370_R_ONT.9816.2_1
Chr1:18132683-18133923	AT1G49010	Chr1:18133139-18133258	IR	3	3	-	ONT.1449.2	-38.94	0.00396571	0.00421719	25.9259259259259|44.5544554455446|46.3414634146341	0|0|0	Chr1_18133139_18133258_R_ONT.1449.2_1
Chr2:15165437-15166465	AT2G36120	Chr2:15165595-15166158	IR	3	3	-	AT2G36120.1	-39.26	0.000104945	0.000156093	41.7721518987342|41.8604651162791|34.1463414634146	0|0|0	Chr2_15165595_15166158_R_AT2G36120.1_1
Chr1:13078138-13079766	AT1G35515	Chr1:13078268-13079304	IR	3	3	-	ONT.1310.1	-39.91	1.05988e-05	1.10632e-05	37.9310344827586|42.7536231884058|39.041095890411	0|0|0	Chr1_13078268_13079304_R_ONT.1310.1_1
Chr5:7513529-7514453	AT5G22608	Chr5:7513642-7513918	IR	3	3	-	ONT.15782.2	-40.4	0.00187428	0.0738079	29.4117647058824|44.7368421052632|47.0588235294118	0|0|0	Chr5_7513642_7513918_R_ONT.15782.2_1
Chr2:10125368-10127526	AT2G23790	Chr2:10126661-10126903	IR	3	3	-	Ex.ONT.7114.3	-40.4	0.00744831	0.0102777	31.8181818181818|56.5217391304348|32.8571428571429	0|0|0	Chr2_10126661_10126903_R_Ex.ONT.7114.3_1
Chr5:7513919-7514453	AT5G22608	Chr5:7514032-7514204	IR	3	3	-	AT5G22608.1	-40.67	0.00378933	0.148903	27.2727272727273|46.1538461538462|48.5714285714286	0|0|0	Chr5_7514032_7514204_R_AT5G22608.1_1
Chr5:7513919-7514453	AT5G22608	Chr5:7514032-7514171	IR	3	3	-	AT5G22608.1	-40.67	0.00378933	0.148903	27.2727272727273|46.1538461538462|48.5714285714286	0|0|0	Chr5_7514032_7514171_R_AT5G22608.1_1
Chr2:15165437-15166465	AT2G36120	Chr2:15165685-15166149	IR	3	3	-	AT2G36120.1	-41.12	2.04435e-05	3.04419e-05	38.1578947368421|44.2857142857143|40.9090909090909	0|0|0	Chr2_15165685_15166149_R_AT2G36120.1_1
Chr2:15165437-15166465	AT2G36120	Chr2:15165676-15166149	IR	3	3	-	AT2G36120.1	-41.12	2.04435e-05	3.04419e-05	38.1578947368421|44.2857142857143|40.9090909090909	0|0|0	Chr2_15165676_15166149_R_AT2G36120.1_1
Chr2:15165437-15166465	AT2G36120	Chr2:15165658-15166149	IR	3	3	-	AT2G36120.1	-41.12	2.04435e-05	3.04419e-05	38.1578947368421|44.2857142857143|40.9090909090909	0|0|0	Chr2_15165658_15166149_R_AT2G36120.1_1
Chr2:15165437-15166465	AT2G36120	Chr2:15165637-15166149	IR	3	3	-	AT2G36120.1	-41.12	2.04435e-05	3.04419e-05	38.1578947368421|44.2857142857143|40.9090909090909	0|0|0	Chr2_15165637_15166149_R_AT2G36120.1_1
Chr2:15165437-15166465	AT2G36120	Chr2:15165628-15166149	IR	3	3	-	AT2G36120.1	-41.12	2.04435e-05	3.04419e-05	38.1578947368421|44.2857142857143|40.9090909090909	0|0|0	Chr2_15165628_15166149_R_AT2G36120.1_1
ChrC:84337-85843	ATCG00830	ChrC:84772-85453	IR	3	3	-	Ex.ATCG00830.1	-41.23	6.45851e-05	0.216413	45.1612903225806|41.5584415584416|36.9565217391304	0|0|0	ChrC_84772_85453_R_Ex.ATCG00830.1_1
ChrC:83946-85900	ATCG00830	ChrC:84771-85452	IR	3	3	-	Ex.ONT.19541.6	-41.23	6.45851e-05	0.216413	45.1612903225806|41.5584415584416|36.9565217391304	0|0|0	ChrC_84771_85452_R_Ex.ONT.19541.6_1
Chr2:15165437-15166465	AT2G36120	Chr2:15165601-15166163	IR	3	3	-	AT2G36120.1	-41.44	4.64435e-05	6.91159e-05	44.578313253012|42.5287356321839|37.2093023255814	0|0|0	Chr2_15165601_15166163_R_AT2G36120.1_1
Chr2:15165437-15166465	AT2G36120	Chr2:15165625-15166119	IR	3	3	-	AT2G36120.1	-41.59	0.000135655	0.000201731	45.8333333333333|36.0655737704918|42.8571428571429	0|0|0	Chr2_15165625_15166119_R_AT2G36120.1_1
Chr2:15165437-15166465	AT2G36120	Chr2:15165685-15166152	IR	3	3	-	AT2G36120.1	-41.63	4.97694e-05	7.40623e-05	38.1578947368421|45.8333333333333|40.9090909090909	0|0|0	Chr2_15165685_15166152_R_AT2G36120.1_1
Chr2:15165437-15166465	AT2G36120	Chr2:15165658-15166152	IR	3	3	-	AT2G36120.1	-41.9	3.35042e-05	4.98659e-05	38.961038961039|45.8333333333333|40.9090909090909	0|0|0	Chr2_15165658_15166152_R_AT2G36120.1_1
Chr2:15165437-15166465	AT2G36120	Chr2:15165646-15166151	IR	3	3	-	AT2G36120.1	-41.9	3.35042e-05	4.98659e-05	38.961038961039|45.8333333333333|40.9090909090909	0|0|0	Chr2_15165646_15166151_R_AT2G36120.1_1
Chr2:15165437-15166465	AT2G36120	Chr2:15165625-15166152	IR	3	3	-	AT2G36120.1	-41.9	3.35042e-05	4.98659e-05	38.961038961039|45.8333333333333|40.9090909090909	0|0|0	Chr2_15165625_15166152_R_AT2G36120.1_1
Chr2:15165437-15166465	AT2G36120	Chr2:15165592-15166152	IR	3	3	-	AT2G36120.1	-41.9	3.35042e-05	4.98659e-05	38.961038961039|45.8333333333333|40.9090909090909	0|0|0	Chr2_15165592_15166152_R_AT2G36120.1_1
Chr1:13078138-13079766	AT1G35515	Chr1:13078916-13079304	IR (overlapping region)	3	3	-	ONT.1310.1	-42.19	1.62005e-06	1.69117e-06	41.9354838709677|43.9716312056738|40.6666666666667	0|0|0	Chr1_13078916_13079304_R_ONT.1310.1_1
Chr3:9710756-9711460	AT3G26510	Chr3:9711339-9711399	IR	3	3	-	ONT.11068.3	-42.3	5.53036e-06	1.46566e-05	43.75|39.6825396825397|43.4782608695652	0|0|0	Chr3_9711339_9711399_R_ONT.11068.3_1
Chr1:13078138-13079766	AT1G35515	Chr1:13078930-13079304	IR (overlapping region)	3	3	-	ONT.1310.1	-42.32	2.5839e-06	2.69717e-06	41.9354838709677|44.3661971830986|40.6666666666667	0|0|0	Chr1_13078930_13079304_R_ONT.1310.1_1
Chr4:16187056-16187676	AT4G33740	Chr4:16187197-16187361	IR	3	3	-	Ex.ONT.13184.5	-43.24	7.31345e-05	0.000243028	38.121546961326|46.1928934010152|45.4106280193237	0|0|0	Chr4_16187197_16187361_R_Ex.ONT.13184.5_1
Chr2:15165437-15166465	AT2G36120	Chr2:15165628-15166137	IR	3	3	-	AT2G36120.1	-43.32	0.000112618	0.0001675	48|38.0952380952381|43.859649122807	0|0|0	Chr2_15165628_15166137_R_AT2G36120.1_1
Chr2:15165437-15166465	AT2G36120	Chr2:15165518-15166158	IR	3	3	-	AT2G36120.1	-43.9	3.01832e-05	4.49323e-05	41.7721518987342|41.8604651162791|48.0769230769231	0|0|0	Chr2_15165518_15166158_R_AT2G36120.1_1
Chr1:29992397-29993724	AT1G79700	Chr1:29993089-29993321	IR	3	3	-	ONT.5077.10	-43.94	0.00144664	0.00175909	34.7826086956522|42.8571428571429|54.1666666666667	0|0|0	Chr1_29993089_29993321_R_ONT.5077.10_1
Chr2:17946468-17947012	AT2G43150	Chr2:17946568-17946650	IR	3	3	-	Ex.ONT.6395.1	-44.15	4.89154e-08	7.69022e-08	43.5643564356436|44.9648711943794|43.9276485788114	0|0|0	Chr2_17946568_17946650_R_Ex.ONT.6395.1_1
Chr2:17945893-17946567	AT2G43150	Chr2:17946015-17946468	IR	3	3	-	AT2G43150.1	-44.57	1.75594e-08	2.76071e-08	44.299674267101|45.2214452214452|44.1860465116279	0|0|0	Chr2_17946015_17946468_R_AT2G43150.1_1
Chr3:2296092-2296625	ONT.10312	Chr3:2296386-2296528	IR	3	3	-	Ex.ONT.10312.3	-44.69	7.50381e-05	0.000161329	41.5094339622642|42.5531914893617|50	0|0|0	Chr3_2296386_2296528_R_Ex.ONT.10312.3_1
Chr5:19005601-19006277	AT5G46840	Chr5:19005680-19005737	IR	3	3	-	AT5G46840.1	-44.97	0.00938002	0.0533629	53.125|25.8620689655172|55.9322033898305	0|0|0	Chr5_19005680_19005737_R_AT5G46840.1_1
Chr2:7995739-7997192	ONT.6921	Chr2:7995975-7996356	IR	3	3	-	ONT.6921.3	-45.13	0.00131742	0.00223217	34.7826086956522|54.1666666666667|46.4285714285714	0|0|0	Chr2_7995975_7996356_R_ONT.6921.3_1
Chr2:15165437-15166465	AT2G36120	Chr2:15165628-15166143	IR	3	3	-	AT2G36120.1	-45.26	0.000139193	0.000206983	50.9433962264151|40|44.8275862068966	0|0|0	Chr2_15165628_15166143_R_AT2G36120.1_1
ChrM:134309-136072	ATMG00510	ChrM:134776-135828	IR	3	3	-	Ex.ATMG00510.1	-45.29	0.00840611	1	26.6666666666667|56.25|52.9411764705882	0|0|0	ChrM_134776_135828_R_Ex.ATMG00510.1_1
Chr2:1382574-1383499	ONT.6732	Chr2:1382858-1383047	IR	3	3	-	ONT.6732.2	-45.36	7.53396e-05	0.000110152	50.7936507936508|42.6229508196721|42.6666666666667	0|0|0	Chr2_1382858_1383047_R_ONT.6732.2_1
Chr1:21214139-21215404	ONT.4258	Chr1:21214790-21215106	IR	3	3	-	ONT.4258.1	-45.45	0.000142026	0.000156612	50|39.2857142857143|47.0588235294118	0|0|0	Chr1_21214790_21215106_R_ONT.4258.1_1
Chr3:2296529-2297735	ONT.10312	Chr3:2296626-2296708	IR	3	3	-	Ex.ONT.10312.1	-45.61	0.000135688	0.000291691	41.5094339622642|43.4782608695652|51.8518518518518	0|0|0	Chr3_2296626_2296708_R_Ex.ONT.10312.1_1
Chr3:2296529-2296814	ONT.10312	Chr3:2296568-2296708	IR	3	3	-	Ex.ONT.10312.4	-45.61	0.000135688	0.000291691	41.5094339622642|43.4782608695652|51.8518518518518	0|0|0	Chr3_2296568_2296708_R_Ex.ONT.10312.4_1
Chr2:15165437-15166465	AT2G36120	Chr2:15165682-15166197	IR	3	3	-	AT2G36120.1	-46.57	0.000757049	0.00112544	36.8421052631579|49.2063492063492|53.6585365853659	0|0|0	Chr2_15165682_15166197_R_AT2G36120.1_1
Chr2:18866061-18867160	AT2G45830	Chr2:18866504-18866606	IR (overlapping region)	3	3	-	AT2G45830.2	-46.63	0.000126901	0.000203731	45|42.1052631578947|52.7777777777778	0|0|0	Chr2_18866504_18866606_R_AT2G45830.2_1
Chr2:15165437-15166465	AT2G36120	Chr2:15165628-15166146	IR	3	3	-	AT2G36120.1	-46.73	2.94923e-05	4.39055e-05	50.9433962264151|43.4782608695652|45.7627118644068	0|0|0	Chr2_15165628_15166146_R_AT2G36120.1_1
Chr2:15165437-15166465	AT2G36120	Chr2:15165625-15166146	IR	3	3	-	AT2G36120.1	-46.73	2.94923e-05	4.39055e-05	50.9433962264151|43.4782608695652|45.7627118644068	0|0|0	Chr2_15165625_15166146_R_AT2G36120.1_1
Chr1:4758851-4759901	ONT.3130	Chr1:4759203-4759622	IR (overlapping region)	3	3	-	ONT.3130.1	-46.78	9.8633e-06	1.25389e-05	49.1803278688525|43.5483870967742|47.6190476190476	0|0|0	Chr1_4759203_4759622_R_ONT.3130.1_1
Chr2:15165437-15166465	AT2G36120	Chr2:15165511-15166152	IR	3	3	-	AT2G36120.1	-47.4	0.000761353	0.00113174	38.961038961039|46.5753424657534|56.6666666666667	0|0|0	Chr2_15165511_15166152_R_AT2G36120.1_1
Chr2:2023545-2023993	ONT.5270	Chr2:2023677-2023779	IR	3	3	-	ONT.5270.1	-48.47	0.00496175	0.00810086	32.1428571428571|51.7241379310345|61.5384615384615	0|0|0	Chr2_2023677_2023779_R_ONT.5270.1_1
Chr2:18866061-18867160	AT2G45830	Chr2:18866229-18866313	IR (overlapping region)	3	3	-	AT2G45830.2	-48.82	0.00014037	0.000225344	47.6190476190476|43.5897435897436|55.2631578947368	0|0|0	Chr2_18866229_18866313_R_AT2G45830.2_1
Chr2:15165437-15166465	AT2G36120	Chr2:15165676-15166191	IR	3	3	-	AT2G36120.1	-48.89	2.18248e-05	3.24973e-05	44.6153846153846|50.7692307692308|51.2820512820513	0|0|0	Chr2_15165676_15166191_R_AT2G36120.1_1
ChrM:133177-134775	ATMG00510	ChrM:133246-134308	IR	3	3	-	Ex.ATMG00510.1	-49.05	0.000177114	0.466304	42.3076923076923|50|54.8387096774194	0|0|0	ChrM_133246_134308_R_Ex.ATMG00510.1_1
Chr2:2023260-2023998	ONT.5270	Chr2:2023458-2023544	IR	3	3	-	ONT.5270.2	-49.25	0.00338541	0.00552748	34.4827586206897|51.7241379310345|61.5384615384615	0|0|0	Chr2_2023458_2023544_R_ONT.5270.2_1
Chr1:109032-111609	AT1G01260	Chr1:109331-109412	IR	3	3	-	AT1G01260.1	-49.43	0.00140056	0.00143958	50|38.2978723404255|60	0|0|0	Chr1_109331_109412_R_AT1G01260.1_1
Chr1:109032-111609	AT1G01260	Chr1:109331-109405	IR	3	3	-	AT1G01260.1	-49.43	0.00140056	0.00143958	50|38.2978723404255|60	0|0|0	Chr1_109331_109405_R_AT1G01260.1_1
Chr2:8969417-8970630	AT2G20830	Chr2:8969812-8970017	IR	3	3	-	AT2G20830.1	-49.75	4.70977e-08	8.09237e-08	49.3670886075949|49.2063492063492|50.6849315068493	0|0|0	Chr2_8969812_8970017_R_AT2G20830.1_1
ChrC:11529-12798	ATCG00130	ChrC:11939-12653	IR	3	3	-	Ex.ATCG00130.1	-50.75	3.38979e-05	0.173386	45.7865168539326|53.3434650455927|53.1305903398927	0|0|0	ChrC_11939_12653_R_Ex.ATCG00130.1_1
Chr3:2296709-2297735	ONT.10312	Chr3:2296815-2297716	IR	3	3	-	ONT.10312.1	-51.27	6.29836e-05	0.000135428	46.9387755102041|50|56.8627450980392	0|0|0	Chr3_2296815_2297716_R_ONT.10312.1_1
Chr2:15165437-15166465	AT2G36120	Chr2:15165619-15166192	IR	3	3	-	AT2G36120.1	-51.29	2.4159e-06	3.59862e-06	48.8095238095238|53.1645569620253|51.8987341772152	0|0|0	Chr2_15165619_15166192_R_AT2G36120.1_1
Chr2:15165437-15166465	AT2G36120	Chr2:15165619-15166194	IR	3	3	-	AT2G36120.1	-51.89	1.93773e-06	2.88646e-06	49.4117647058824|53.1645569620253|53.0864197530864	0|0|0	Chr2_15165619_15166194_R_AT2G36120.1_1
Chr2:13863730-13864600	AT2G32690	Chr2:13864029-13864322	IR	3	3	-	Ex.ONT.7457.40	-52.41	0.000225793	0.000330429	44.1176470588235|56.6666666666667|56.4516129032258	0|0|0	Chr2_13864029_13864322_R_Ex.ONT.7457.40_1
Chr2:13863725-13864600	AT2G32690	Chr2:13864026-13864322	IR	3	3	-	Ex.ONT.7457.21	-52.41	0.000225793	0.000330429	44.1176470588235|56.6666666666667|56.4516129032258	0|0|0	Chr2_13864026_13864322_R_Ex.ONT.7457.21_1
Chr3:20827979-20829140	ONT.11692	Chr3:20828557-20828690	IR (overlapping region)	3	3	-	ONT.11692.1	-52.46	2.67062e-09	5.422e-09	52.9411764705882|52.2727272727273|52.1739130434783	0|0|0	Chr3_20828557_20828690_R_ONT.11692.1_1
ChrC:43496-45978	ATCG00360	ChrC:43754-44467	IR	3	3	-	Ex.ONT.19529.1	-52.51	5.8822e-06	0.108406	54.5454545454545|49.2307692307692|53.75	0|0|0	ChrC_43754_44467_R_Ex.ONT.19529.1_1
Chr2:15165437-15166465	AT2G36120	Chr2:15165617-15166187	IR	3	3	-	AT2G36120.1	-52.63	2.64277e-05	3.93463e-05	48.1927710843374|53.1645569620253|56.5217391304348	0|0|0	Chr2_15165617_15166187_R_AT2G36120.1_1
Chr2:15165437-15166465	AT2G36120	Chr2:15165615-15166187	IR	3	3	-	AT2G36120.1	-52.63	2.64277e-05	3.93463e-05	48.1927710843374|53.1645569620253|56.5217391304348	0|0|0	Chr2_15165615_15166187_R_AT2G36120.1_1
Chr2:15165437-15166465	AT2G36120	Chr2:15165619-15166196	IR	3	3	-	AT2G36120.1	-52.8	9.11291e-06	1.35725e-05	49.4117647058824|53.1645569620253|55.8139534883721	0|0|0	Chr2_15165619_15166196_R_AT2G36120.1_1
Chr2:13863730-13864597	AT2G32690	Chr2:13864119-13864250	IR	3	3	-	Ex.ONT.7457.37	-52.85	1.7224e-07	2.52449e-07	52.7272727272727|54.0983606557377|51.7241379310345	0|0|0	Chr2_13864119_13864250_R_Ex.ONT.7457.37_1
Chr2:13863726-13864588	AT2G32690	Chr2:13864023-13864317	IR	3	3	-	Ex.ONT.7457.22	-52.92	0.000189459	0.000277312	44.9275362318841|57.3770491803279|56.4516129032258	0|0|0	Chr2_13864023_13864317_R_Ex.ONT.7457.22_1
Chr2:13863730-13864599	AT2G32690	Chr2:13864020-13864322	IR	3	3	-	Ex.ONT.7457.39	-53.24	0.00022108	0.000323557	44.9275362318841|58.3333333333333|56.4516129032258	0|0|0	Chr2_13864020_13864322_R_Ex.ONT.7457.39_1
Chr4:10477295-10477887	AT4G19160	Chr4:10477531-10477820	IR	3	3	-	ONT.12597.3	-53.36	6.38457e-06	1.7324e-05	55.6561085972851|54.4186046511628|50	0|0|0	Chr4_10477531_10477820_R_ONT.12597.3_1
Chr2:13863732-13864600	AT2G32690	Chr2:13864026-13864361	IR	3	3	-	Ex.ONT.7457.46	-53.37	0.000339759	0.000497031	44.1176470588235|56.6666666666667|59.3220338983051	0|0|0	Chr2_13864026_13864361_R_Ex.ONT.7457.46_1
Chr2:13863729-13864600	AT2G32690	Chr2:13864029-13864361	IR	3	3	-	Ex.ONT.7457.31	-53.37	0.000339759	0.000497031	44.1176470588235|56.6666666666667|59.3220338983051	0|0|0	Chr2_13864029_13864361_R_Ex.ONT.7457.31_1
Chr2:13863724-13864600	AT2G32690	Chr2:13864026-13864367	IR	3	3	-	Ex.ONT.7457.16	-53.37	0.000339759	0.000497031	44.1176470588235|56.6666666666667|59.3220338983051	0|0|0	Chr2_13864026_13864367_R_Ex.ONT.7457.16_1
Chr2:13863724-13864591	AT2G32690	Chr2:13864026-13864346	IR	3	3	-	Ex.ONT.7457.7	-53.37	0.000339759	0.000497031	44.1176470588235|56.6666666666667|59.3220338983051	0|0|0	Chr2_13864026_13864346_R_Ex.ONT.7457.7_1
Chr2:13863720-13864595	AT2G32690	Chr2:13864110-13864253	IR	3	3	-	Ex.ONT.7457.1	-53.37	2.17407e-07	3.18638e-07	52.7272727272727|54.8387096774194|52.5423728813559	0|0|0	Chr2_13864110_13864253_R_Ex.ONT.7457.1_1
Chr2:15165437-15166465	AT2G36120	Chr2:15165625-15166197	IR	3	3	-	AT2G36120.1	-54.13	6.55739e-06	9.7668e-06	53.8461538461538|51.25|57.3033707865169	0|0|0	Chr2_15165625_15166197_R_AT2G36120.1_1
Chr2:13863724-13864595	AT2G32690	Chr2:13864029-13864289	IR	3	3	-	Ex.ONT.7457.10	-54.14	0.000218612	0.000319957	45.7142857142857|57.3770491803279|59.3220338983051	0|0|0	Chr2_13864029_13864289_R_Ex.ONT.7457.10_1
Chr2:13863722-13864600	AT2G32690	Chr2:13864024-13864299	IR	3	3	-	Ex.ONT.7457.5	-54.14	0.000218612	0.000319957	45.7142857142857|57.3770491803279|59.3220338983051	0|0|0	Chr2_13864024_13864299_R_Ex.ONT.7457.5_1
Chr2:13863730-13864597	AT2G32690	Chr2:13864026-13864289	IR	3	3	-	Ex.ONT.7457.36	-54.33	0.000329193	0.000481669	44.9275362318841|58.0645161290323|60	0|0|0	Chr2_13864026_13864289_R_Ex.ONT.7457.36_1
Chr1:30358185-30359373	AT1G80780	Chr1:30358296-30358394	IR	3	3	-	Ex.ONT.2589.2	-54.51	1.3548e-09	1.67798e-09	54.8514851485149|54.1247484909457|54.5643153526971	0|0|0	Chr1_30358296_30358394_R_Ex.ONT.2589.2_1
Chr1:30358184-30359373	AT1G80780	Chr1:30358296-30358378	IR	3	3	-	Ex.AT1G80780.1	-54.51	1.3548e-09	1.67798e-09	54.8514851485149|54.1247484909457|54.5643153526971	0|0|0	Chr1_30358296_30358378_R_Ex.AT1G80780.1_1
Chr2:15165437-15166465	AT2G36120	Chr2:15165601-15166194	IR	3	3	-	AT2G36120.1	-54.56	1.05667e-06	1.57415e-06	53.8461538461538|56.7567567567568|53.0864197530864	0|0|0	Chr2_15165601_15166194_R_AT2G36120.1_1
Chr2:13863724-13864600	AT2G32690	Chr2:13864011-13864253	IR	3	3	-	Ex.ONT.7457.20	-54.9	3.80959e-06	5.5821e-06	55.9322033898305|51.8518518518518|56.9230769230769	0|0|0	Chr2_13864011_13864253_R_Ex.ONT.7457.20_1
Chr2:13863724-13864600	AT2G32690	Chr2:13863975-13864322	IR	3	3	-	Ex.ONT.7457.19	-55.28	0.000258584	0.0003784	46.4788732394366|61.5384615384615|57.8125	0|0|0	Chr2_13863975_13864322_R_Ex.ONT.7457.19_1
Chr2:13863724-13864600	AT2G32690	Chr2:13864026-13864265	IR	3	3	-	Ex.ONT.7457.17	-55.7	0.000290892	0.000425644	46.4788732394366|58.7301587301587|61.9047619047619	0|0|0	Chr2_13864026_13864265_R_Ex.ONT.7457.17_1
Chr2:13863724-13864597	AT2G32690	Chr2:13864026-13864217	IR	3	3	-	Ex.ONT.7457.11	-56.3	0.000333037	0.000487274	46.4788732394366|61.7647058823529|60.655737704918	0|0|0	Chr2_13864026_13864217_R_Ex.ONT.7457.11_1
Chr1:5295773-5296824	AT1G15400	Chr1:5296047-5296405	IR	3	3	-	Ex.AT1G15400.3	-56.35	6.29577e-05	8.08726e-05	50.4065040650407|61.4906832298137|57.1428571428571	0|0|0	Chr1_5296047_5296405_R_Ex.AT1G15400.3_1
Chr2:13863724-13864597	AT2G32690	Chr2:13864011-13864289	IR	3	3	-	Ex.ONT.7457.12	-56.39	0.000151403	0.000221635	58.1818181818182|48.6842105263158|62.2950819672131	0|0|0	Chr2_13864011_13864289_R_Ex.ONT.7457.12_1
Chr5:4932850-4933577	AT5G15190	Chr5:4933035-4933117	IR	3	3	-	AT5G15190.1	-56.54	0.000387112	0.00698754	52.9411764705882|66.6666666666667|50	0|0|0	Chr5_4933035_4933117_R_AT5G15190.1_1
Chr2:15165437-15166465	AT2G36120	Chr2:15165604-15166086	IR	3	3	-	AT2G36120.1	-56.57	7.62331e-05	0.00011343	50|61.3636363636364|58.3333333333333	0|0|0	Chr2_15165604_15166086_R_AT2G36120.1_1
Chr2:13863727-13864597	AT2G32690	Chr2:13864011-13864271	IR	3	3	-	Ex.ONT.7457.25	-56.83	9.55122e-05	0.000139835	58.1818181818182|50|62.2950819672131	0|0|0	Chr2_13864011_13864271_R_Ex.ONT.7457.25_1
Chr1:29331355-29333092	ONT.4996	Chr1:29332622-29332733	IR (overlapping region)	3	3	-	ONT.4996.1	-56.99	4.75516e-05	5.78375e-05	51.7857142857143|56.8720379146919|62.3076923076923	0|0|0	Chr1_29332622_29332733_R_ONT.4996.1_1
Chr2:13863733-13864588	AT2G32690	Chr2:13864005-13864250	IR	3	3	-	Ex.ONT.7457.49	-57.62	1.22085e-06	1.78909e-06	55.9322033898305|60|56.9230769230769	0|0|0	Chr2_13864005_13864250_R_Ex.ONT.7457.49_1
Chr2:13863729-13864597	AT2G32690	Chr2:13864003-13864250	IR	3	3	-	Ex.ONT.7457.28	-57.62	1.22085e-06	1.78909e-06	55.9322033898305|60|56.9230769230769	0|0|0	Chr2_13864003_13864250_R_Ex.ONT.7457.28_1
Chr3:19053440-19053995	ONT.9549	Chr3:19053862-19053969	IR (overlapping region)	3	3	-	ONT.9549.1	-57.65	2.40614e-05	4.55348e-05	62.2516556291391|57.4193548387097|53.2934131736527	0|0|0	Chr3_19053862_19053969_R_ONT.9549.1_1
Chr1:29450750-29452476	ONT.2491	Chr1:29451644-29451706	IR (overlapping region)	3	3	-	ONT.2491.1	-57.88	2.45611e-06	2.99143e-06	58.8235294117647|55|59.8039215686275	0|0|0	Chr1_29451644_29451706_R_ONT.2491.1_1
Chr3:19053440-19053995	ONT.9549	Chr3:19053713-19053789	IR (overlapping region)	3	3	-	ONT.9549.1	-58.09	2.25184e-05	4.26168e-05	62.5|58.1699346405229|53.6144578313253	0|0|0	Chr3_19053713_19053789_R_ONT.9549.1_1
Chr2:15165437-15166465	AT2G36120	Chr2:15165601-15166083	IR	3	3	-	AT2G36120.1	-58.5	7.8911e-05	0.000117409	51.5151515151515|63.0434782608696|60.9375	0|0|0	Chr2_15165601_15166083_R_AT2G36120.1_1
Chr5:25383906-25387224	AT5G63370	Chr5:25385078-25385155	IR	3	3	-	AT5G63370.1	-58.86	2.40679e-06	2.25616e-05	61.1764705882353|59.3023255813954|56.0975609756098	0|0|0	Chr5_25385078_25385155_R_AT5G63370.1_1
Chr5:25383906-25387224	AT5G63370	Chr5:25385078-25385150	IR	3	3	-	AT5G63370.1	-58.86	2.40679e-06	2.25616e-05	61.1764705882353|59.3023255813954|56.0975609756098	0|0|0	Chr5_25385078_25385150_R_AT5G63370.1_1
Chr2:13863730-13864600	AT2G32690	Chr2:13864026-13864181	IR	3	3	-	Ex.ONT.7457.44	-60.81	0.000289681	0.000423889	50.6493506493506|67.0886075949367|64.7058823529412	0|0|0	Chr2_13864026_13864181_R_Ex.ONT.7457.44_1
Chr1:5295827-5296882	AT1G15400	Chr1:5296052-5296405	IR	3	3	-	Ex.AT1G15400.1	-60.83	7.28123e-06	9.35346e-06	57.0422535211268|63.953488372093|61.4973262032086	0|0|0	Chr1_5296052_5296405_R_Ex.AT1G15400.1_1
Chr5:13414751-13415073	AT5G35160	Chr5:13414784-13414942	IR	3	3	-	Ex.AT5G35160.1	-61.03	0.000358127	0.00164796	60.1769911504425|52.0661157024793|70.8333333333333	0|0|0	Chr5_13414784_13414942_R_Ex.AT5G35160.1_1
Chr2:8969417-8970630	AT2G20830	Chr2:8969812-8970090	IR	3	3	-	AT2G20830.1	-61.19	2.03777e-07	3.50116e-07	60.7843137254902|62.7906976744186|60	0|0|0	Chr2_8969812_8970090_R_AT2G20830.1_1
Chr2:15165437-15166465	AT2G36120	Chr2:15165707-15166181	IR	3	3	-	AT2G36120.1	-61.66	0.00182526	0.00271302	45.4545454545455|73.5294117647059|66	0|0|0	Chr2_15165707_15166181_R_AT2G36120.1_1
Chr2:15165437-15166465	AT2G36120	Chr2:15165658-15166173	IR	3	3	-	AT2G36120.1	-62.59	6.00271e-05	8.93233e-05	63.8297872340426|68|55.9322033898305	0|0|0	Chr2_15165658_15166173_R_AT2G36120.1_1
Chr2:13863730-13864600	AT2G32690	Chr2:13863975-13864250	IR	3	3	-	Ex.ONT.7457.41	-62.77	6.20622e-06	9.09346e-06	60|66.6666666666667|61.6438356164384	0|0|0	Chr2_13863975_13864250_R_Ex.ONT.7457.41_1
ChrM:25482-28733	ATMG00090	ChrM:27078-28658	IR	3	3	-	Ex.ATMG00090.1	-62.79	1.78795e-05	0.164755	57.5757575757576|65|65.7894736842105	0|0|0	ChrM_27078_28658_R_Ex.ATMG00090.1_1
ChrM:25223-28730	ATMG00090	ChrM:27079-28659	IR	3	3	-	Ex.ONT.19562.2	-62.79	1.78795e-05	0.164755	57.5757575757576|65|65.7894736842105	0|0|0	ChrM_27079_28659_R_Ex.ONT.19562.2_1
Chr5:25383906-25387224	AT5G63370	Chr5:25385078-25387099	IR	3	3	-	AT5G63370.1	-63.29	8.3023e-07	7.78663e-06	61.6822429906542|65.6862745098039|62.5	0|0|0	Chr5_25385078_25387099_R_AT5G63370.1_1
Chr2:13863722-13864585	AT2G32690	Chr2:13864137-13864361	IR	3	3	-	Ex.ONT.7457.3	-63.52	2.67108e-05	3.91231e-05	57.7777777777778|65.3846153846154|67.3913043478261	0|0|0	Chr2_13864137_13864361_R_Ex.ONT.7457.3_1
Chr2:13863722-13864591	AT2G32690	Chr2:13864146-13864361	IR	3	3	-	Ex.ONT.7457.4	-63.74	3.76437e-05	5.51343e-05	57.7777777777778|64.7058823529412|68.75	0|0|0	Chr2_13864146_13864361_R_Ex.ONT.7457.4_1
Chr2:13863730-13864593	AT2G32690	Chr2:13864035-13864361	IR	3	3	-	Ex.ONT.7457.33	-64.22	1.81513e-06	2.65988e-06	61.2244897959184|65.3846153846154|66.0377358490566	0|0|0	Chr2_13864035_13864361_R_Ex.ONT.7457.33_1
Chr1:11453714-11455181	ONT.1197	Chr1:11454487-11454571	IR (overlapping region)	3	3	-	ONT.1197.4	-65.23	2.12608e-06	2.194e-06	62.6373626373626|68.1318681318681|64.9350649350649	0|0|0	Chr1_11454487_11454571_R_ONT.1197.4_1
Chr2:13863730-13864588	AT2G32690	Chr2:13864005-13864361	IR	3	3	-	Ex.ONT.7457.32	-65.27	1.91551e-05	2.80607e-05	60.4166666666667|65.3846153846154|70	0|0|0	Chr2_13864005_13864361_R_Ex.ONT.7457.32_1
Chr2:15165437-15166465	AT2G36120	Chr2:15165671-15166181	IR	3	3	-	AT2G36120.1	-65.5	1.7109e-06	2.54868e-06	62.5|67.3469387755102|66.6666666666667	0|0|0	Chr2_15165671_15166181_R_AT2G36120.1_1
Chr2:13863733-13864588	AT2G32690	Chr2:13864002-13864361	IR	3	3	-	Ex.ONT.7457.48	-65.54	1.32865e-05	1.94653e-05	61.2244897959184|65.3846153846154|70	0|0|0	Chr2_13864002_13864361_R_Ex.ONT.7457.48_1
Chr2:15165437-15166465	AT2G36120	Chr2:15165658-15166209	IR	3	3	-	AT2G36120.1	-65.66	3.45585e-07	5.14913e-07	63.8297872340426|67.3469387755102|65.7894736842105	0|0|0	Chr2_15165658_15166209_R_AT2G36120.1_1
Chr2:15165437-15166465	AT2G36120	Chr2:15165604-15166176	IR	3	3	-	AT2G36120.1	-65.68	0.000121517	0.000180714	68.9655172413793|71.1864406779661|56.8965517241379	0|0|0	Chr2_15165604_15166176_R_AT2G36120.1_1
Chr2:15165437-15166465	AT2G36120	Chr2:15165601-15166176	IR	3	3	-	AT2G36120.1	-65.68	0.000121517	0.000180714	68.9655172413793|71.1864406779661|56.8965517241379	0|0|0	Chr2_15165601_15166176_R_AT2G36120.1_1
Chr2:8969417-8970630	AT2G20830	Chr2:8969812-8970600	IR	3	3	-	AT2G20830.1	-65.83	3.70129e-06	6.359e-06	63.963963963964|69.5238095238095|64	0|0|0	Chr2_8969812_8970600_R_AT2G20830.1_1
Chr2:13863724-13864597	AT2G32690	Chr2:13863995-13864361	IR	3	3	-	Ex.ONT.7457.13	-66.01	8.91523e-06	1.30622e-05	62|66.0377358490566|70	0|0|0	Chr2_13863995_13864361_R_Ex.ONT.7457.13_1
Chr2:8969417-8970630	AT2G20830	Chr2:8970431-8970600	IR	3	3	-	AT2G20830.1	-66.56	2.94942e-05	5.06701e-05	63.963963963964|72.8155339805825|62.8865979381443	0|0|0	Chr2_8970431_8970600_R_AT2G20830.1_1
Chr5:2330399-2332281	AT5G07370	Chr5:2330845-2330956	IR	3	3	-	AT5G07370.4	-67.01	4.63175e-07	3.49553e-06	65.7142857142857|66.0714285714286|69.2307692307692	0|0|0	Chr5_2330845_2330956_R_AT5G07370.4_1
Chr5:19240431-19241221	AT5G47430	Chr5:19240610-19240801	IR	3	3	-	Ex.AT5G47430.1	-67.13	2.18391e-07	1.25796e-06	66|66.412213740458|68.9655172413793	0|0|0	Chr5_19240610_19240801_R_Ex.AT5G47430.1_1
Chr3:7916489-7919484	AT3G22380	Chr3:7918872-7918944	IR	3	3	-	AT3G22380.1	-68.02	0.000131157	0.000336019	60.655737704918|76.7241379310345|66.6666666666667	0|0|0	Chr3_7918872_7918944_R_AT3G22380.1_1
Chr2:15165437-15166465	AT2G36120	Chr2:15165667-15166182	IR	3	3	-	AT2G36120.1	-68.64	8.42707e-05	0.000125358	62.5|76.7441860465116|66.6666666666667	0|0|0	Chr2_15165667_15166182_R_AT2G36120.1_1
Chr2:15165437-15166465	AT2G36120	Chr2:15165666-15166181	IR	3	3	-	AT2G36120.1	-68.64	8.42707e-05	0.000125358	62.5|76.7441860465116|66.6666666666667	0|0|0	Chr2_15165666_15166181_R_AT2G36120.1_1
Chr2:15165437-15166465	AT2G36120	Chr2:15165682-15166181	IR	3	3	-	AT2G36120.1	-68.7	0.000191118	0.000284187	60.8695652173913|78.5714285714286|66.6666666666667	0|0|0	Chr2_15165682_15166181_R_AT2G36120.1_1
Chr2:15165437-15166465	AT2G36120	Chr2:15165646-15166181	IR	3	3	-	AT2G36120.1	-69.07	8.14313e-05	0.000121144	63.265306122449|77.2727272727273|66.6666666666667	0|0|0	Chr2_15165646_15166181_R_AT2G36120.1_1
Chr5:25383906-25387224	AT5G63370	Chr5:25386786-25387099	IR	3	3	-	AT5G63370.1	-69.4	1.87997e-05	0.000176141	66.9354838709677|75.2380952380952|66.0377358490566	0|0|0	Chr5_25386786_25387099_R_AT5G63370.1_1
Chr5:25383906-25387224	AT5G63370	Chr5:25386783-25387099	IR	3	3	-	AT5G63370.1	-69.4	1.87997e-05	0.000176141	66.9354838709677|75.2380952380952|66.0377358490566	0|0|0	Chr5_25386783_25387099_R_AT5G63370.1_1
Chr2:15165437-15166465	AT2G36120	Chr2:15165676-15166143	IR	3	3	-	AT2G36120.1	-69.81	8.04634e-05	0.000119714	71.0526315789474|61.9047619047619|76.4705882352941	0|0|0	Chr2_15165676_15166143_R_AT2G36120.1_1
Chr2:13863724-13864600	AT2G32690	Chr2:13864035-13864274	IR	3	3	-	Ex.ONT.7457.18	-69.85	1.72723e-05	2.53036e-05	75.609756097561|66.6666666666667|67.2727272727273	0|0|0	Chr2_13864035_13864274_R_Ex.ONT.7457.18_1
Chr4:12332641-12333711	AT4G23670	Chr4:12333126-12333480	IR	3	3	-	ONT.14246.2	-69.87	2.33748e-06	6.63106e-06	71.7948717948718|71.4285714285714|66.3793103448276	0|0|0	Chr4_12333126_12333480_R_ONT.14246.2_1
Chr2:13863729-13864600	AT2G32690	Chr2:13864035-13864346	IR	3	3	-	Ex.ONT.7457.30	-69.94	3.73209e-06	5.46875e-06	71.4285714285714|72.3404255319149|66.0377358490566	0|0|0	Chr2_13864035_13864346_R_Ex.ONT.7457.30_1
ChrM:40502-42628	ATMG00160	ChrM:40586-41929	IR	3	3	-	Ex.ATMG00160.1	-70.02	3.64207e-05	0.173386	73.6842105263158|63.0434782608696|73.3333333333333	0|0|0	ChrM_40586_41929_R_Ex.ATMG00160.1_1
ChrM:40313-42782	ATMG00160	ChrM:40585-41928	IR	3	3	-	Ex.ONT.19566.2	-70.02	3.64207e-05	0.173386	73.6842105263158|63.0434782608696|73.3333333333333	0|0|0	ChrM_40585_41928_R_Ex.ONT.19566.2_1
Chr3:680944-681999	AT3G03020	Chr3:681292-681568	IR	3	3	-	Ex.AT3G03020.1	-70.69	3.42014e-06	8.46743e-06	74.5762711864407|68.6567164179104|68.8311688311688	0|0|0	Chr3_681292_681568_R_Ex.AT3G03020.1_1
Chr3:680944-681974	AT3G03020	Chr3:681292-681648	IR	3	3	-	Ex.AT3G03020.2	-70.69	3.42014e-06	8.46743e-06	74.5762711864407|68.6567164179104|68.8311688311688	0|0|0	Chr3_681292_681648_R_Ex.AT3G03020.2_1
Chr2:13863727-13864588	AT2G32690	Chr2:13864002-13864271	IR	3	3	-	Ex.ONT.7457.24	-71.03	2.56377e-05	3.75528e-05	66|70|77.0833333333333	0|0|0	Chr2_13864002_13864271_R_Ex.ONT.7457.24_1
Chr2:13863726-13864600	AT2G32690	Chr2:13864005-13864271	IR	3	3	-	Ex.ONT.7457.23	-71.08	2.17165e-05	3.18105e-05	66.6666666666667|69.4915254237288|77.0833333333333	0|0|0	Chr2_13864005_13864271_R_Ex.ONT.7457.23_1
Chr2:13863730-13864600	AT2G32690	Chr2:13864039-13864335	IR	3	3	-	Ex.ONT.7457.43	-71.13	1.15847e-05	1.69727e-05	75|72.3404255319149|66.0377358490566	0|0|0	Chr2_13864039_13864335_R_Ex.ONT.7457.43_1
Chr2:15165437-15166465	AT2G36120	Chr2:15165676-15166146	IR	3	3	-	AT2G36120.1	-71.14	3.24096e-05	4.82446e-05	71.0526315789474|65.2173913043478|77.1428571428572	0|0|0	Chr2_15165676_15166146_R_AT2G36120.1_1
ChrM:163625-167642	ATMG00580	ChrM:164140-167220	IR (overlapping region)	3	3	-	Ex.ATMG00580.1	-71.48	0.000130166	0.36906	67.5675675675676|81.25|65.625	0|0|0	ChrM_164140_167220_R_Ex.ATMG00580.1_1
Chr3:19310533-19312286	AT3G52060	Chr3:19310582-19311533	IR	3	3	-	AT3G52060.2	-71.97	8.59857e-07	1.64172e-06	74.4186046511628|71.9298245614035|69.5652173913043	0|0|0	Chr3_19310582_19311533_R_AT3G52060.2_1
Chr3:19310533-19312286	AT3G52060	Chr3:19310580-19311533	IR	3	3	-	AT3G52060.2	-71.97	8.59857e-07	1.64172e-06	74.4186046511628|71.9298245614035|69.5652173913043	0|0|0	Chr3_19310580_19311533_R_AT3G52060.2_1
Chr5:16665330-16667171	AT5G41670	Chr5:16665544-16665619	IR	3	3	-	AT5G41670.2	-72.11	1.27078e-07	6.43048e-07	71.5846994535519|73.8095238095238|70.935960591133	0|0|0	Chr5_16665544_16665619_R_AT5G41670.2_1
Chr2:13863730-13864599	AT2G32690	Chr2:13864001-13864367	IR	3	3	-	Ex.ONT.7457.38	-72.26	0.000167328	0.000244929	63.0434782608696|72.3404255319149|81.3953488372093	0|0|0	Chr2_13864001_13864367_R_Ex.ONT.7457.38_1
Chr2:13863724-13864599	AT2G32690	Chr2:13864002-13864367	IR	3	3	-	Ex.ONT.7457.14	-72.26	0.000167328	0.000244929	63.0434782608696|72.3404255319149|81.3953488372093	0|0|0	Chr2_13864002_13864367_R_Ex.ONT.7457.14_1
Chr2:13863724-13864595	AT2G32690	Chr2:13864119-13864271	IR	3	3	-	Ex.ONT.7457.9	-72.84	8.09458e-05	0.000118537	80|64.7058823529412|73.8095238095238	0|0|0	Chr2_13864119_13864271_R_Ex.ONT.7457.9_1
Chr2:17194751-17195098	AT2G41230	Chr2:17194897-17194987	IR	3	3	-	Ex.ONT.7823.3	-72.88	2.7246e-05	4.22083e-05	70.6521739130435|79.5180722891566|68.4782608695652	0|0|0	Chr2_17194897_17194987_R_Ex.ONT.7823.3_1
Chr2:13863727-13864600	AT2G32690	Chr2:13864001-13864355	IR	3	3	-	Ex.ONT.7457.26	-72.97	0.000114058	0.000166974	64.5833333333333|72.9166666666667|81.3953488372093	0|0|0	Chr2_13864001_13864355_R_Ex.ONT.7457.26_1
Chr2:13863724-13864599	AT2G32690	Chr2:13864005-13864335	IR	3	3	-	Ex.ONT.7457.15	-72.97	0.000114058	0.000166974	64.5833333333333|72.9166666666667|81.3953488372093	0|0|0	Chr2_13864005_13864335_R_Ex.ONT.7457.15_1
Chr2:13863729-13864597	AT2G32690	Chr2:13864035-13864225	IR	3	3	-	Ex.ONT.7457.29	-73.49	1.95826e-05	2.86859e-05	77.2727272727273|75.9259259259259|67.2727272727273	0|0|0	Chr2_13864035_13864225_R_Ex.ONT.7457.29_1
Chr2:15165437-15166465	AT2G36120	Chr2:15165667-15166146	IR	3	3	-	AT2G36120.1	-73.68	6.08803e-07	9.06991e-07	71.0526315789474|75|75	0|0|0	Chr2_15165667_15166146_R_AT2G36120.1_1
Chr2:13863724-13864591	AT2G32690	Chr2:13863972-13864211	IR	3	3	-	Ex.ONT.7457.8	-74.38	6.33725e-07	9.28766e-07	73.2394366197183|72.8395061728395|77.0491803278689	0|0|0	Chr2_13863972_13864211_R_Ex.ONT.7457.8_1
ChrC:81189-82652	ATCG00790	ChrC:81588-82643	IR	3	3	-	Ex.ATCG00790.1	-75.53	7.88201e-09	0.000290523	75.6035578144854|76.2765957446808|74.7066492829205	0|0|0	ChrC_81588_82643_R_Ex.ATCG00790.1_1
Chr2:15165437-15166465	AT2G36120	Chr2:15165694-15166146	IR	3	3	-	AT2G36120.1	-75.71	9.55482e-05	0.000142123	67.741935483871|75|84.375	0|0|0	Chr2_15165694_15166146_R_AT2G36120.1_1
Chr2:15165437-15166465	AT2G36120	Chr2:15165646-15166173	IR	3	3	-	AT2G36120.1	-76.04	5.99589e-07	8.933e-07	77.5|77.2727272727273|73.3333333333333	0|0|0	Chr2_15165646_15166173_R_AT2G36120.1_1
Chr2:15165437-15166465	AT2G36120	Chr2:15165646-15166172	IR	3	3	-	AT2G36120.1	-76.04	5.99589e-07	8.933e-07	77.5|77.2727272727273|73.3333333333333	0|0|0	Chr2_15165646_15166172_R_AT2G36120.1_1
ChrC:70073-70802	ATCG00670	ChrC:70136-70649	IR	3	3	-	Ex.ONT.19539.2	-76.47	4.23364e-05	0.173386	80|80.8510638297872|68.5714285714286	0|0|0	ChrC_70136_70649_R_Ex.ONT.19539.2_1
ChrC:70072-70798	ATCG00670	ChrC:70136-70650	IR	3	3	-	Ex.ONT.19539.1	-76.47	4.23364e-05	0.173386	80|80.8510638297872|68.5714285714286	0|0|0	ChrC_70136_70650_R_Ex.ONT.19539.1_1
ChrM:167221-169674	ATMG00580	ChrM:167643-169584	IR (overlapping region)	3	3	-	Ex.ATMG00580.1	-76.51	7.85033e-05	0.24113	68.2926829268293|84.3137254901961|76.9230769230769	0|0|0	ChrM_167643_169584_R_Ex.ATMG00580.1_1
Chr1:20803704-20804573	AT1G55675	Chr1:20804463-20804551	IR	3	3	-	AT1G55675.1	-76.51	9.32491e-05	0.000102376	85|76.271186440678|68.2539682539683	0|0|0	Chr1_20804463_20804551_R_AT1G55675.1_1
Chr2:9079008-9079622	ONT.7018	Chr2:9079226-9079352	IR	3	3	-	ONT.7018.2	-76.55	6.73479e-06	1.16107e-05	80|77.9411764705882|71.6981132075472	0|0|0	Chr2_9079226_9079352_R_ONT.7018.2_1
Chr2:15165437-15166465	AT2G36120	Chr2:15165685-15166146	IR	3	3	-	AT2G36120.1	-77.45	2.50227e-05	3.72576e-05	72.972972972973|75|84.375	0|0|0	Chr2_15165685_15166146_R_AT2G36120.1_1
Chr5:3377678-3378407	AT5G10700	Chr5:3378102-3378228	IR (overlapping region)	3	3	-	ONT.17597.1	-77.61	1.25959e-06	1.69752e-05	74.4855967078189|78.1954887218045|80.1556420233463	0|0|0	Chr5_3378102_3378228_R_ONT.17597.1_1
Chr2:15165437-15166465	AT2G36120	Chr2:15165636-15166143	IR	3	3	-	AT2G36120.1	-78.03	8.06636e-05	0.000120007	77.1428571428572|70.2702702702703|86.6666666666667	0|0|0	Chr2_15165636_15166143_R_AT2G36120.1_1
Chr1:20803704-20804573	AT1G55675	Chr1:20804411-20804551	IR	3	3	-	AT1G55675.1	-79.88	3.19553e-05	3.5084e-05	87.1428571428571|78.4615384615385|74.025974025974	0|0|0	Chr1_20804411_20804551_R_AT1G55675.1_1
Chr1:28896371-28896883	AT1G76930	Chr1:28896437-28896605	IR	3	3	-	AT1G76930.1	-79.98	2.34748e-07	2.83961e-07	81.4814814814815|77.7777777777778|80.6818181818182	0|0|0	Chr1_28896437_28896605_R_AT1G76930.1_1
Chr1:28896371-28896883	AT1G76930	Chr1:28896389-28896605	IR	3	3	-	AT1G76930.1	-80.05	1.79288e-07	2.16881e-07	81.4814814814815|78|80.6818181818182	0|0|0	Chr1_28896389_28896605_R_AT1G76930.1_1
Chr1:8860677-8861381	AT1G25275	Chr1:8860868-8861090	IR	3	3	-	ONT.974.2	-80.52	2.76352e-06	3.7508e-06	83.9195979899498|80.9523809523809|76.6839378238342	0|0|0	Chr1_8860868_8861090_R_ONT.974.2_1
Chr5:13414945-13417265	AT5G35160	Chr5:13415074-13415157	IR	3	3	-	AT5G35160.2	-80.86	1.24125e-07	5.71247e-07	79.5698924731183|80.2469135802469|82.7586206896552	0|0|0	Chr5_13415074_13415157_R_AT5G35160.2_1
Chr4:7004335-7006081	AT4G11570	Chr4:7004413-7004685	IR	3	3	-	AT4G11570.2	-81.12	7.04443e-07	2.77494e-06	84.0909090909091|79.2592592592593|80	0|0|0	Chr4_7004413_7004685_R_AT4G11570.2_1
Chr4:7004335-7006081	AT4G11570	Chr4:7004413-7004656	IR	3	3	-	AT4G11570.2	-81.12	7.04443e-07	2.77494e-06	84.0909090909091|79.2592592592593|80	0|0|0	Chr4_7004413_7004656_R_AT4G11570.2_1
Chr2:15165437-15166465	AT2G36120	Chr2:15165526-15166169	IR	3	3	-	AT2G36120.1	-82.3	4.16173e-06	6.19888e-06	77.5510204081633|84.4444444444444|84.9056603773585	0|0|0	Chr2_15165526_15166169_R_AT2G36120.1_1
Chr1:5602873-5604663	AT1G16390	Chr1:5603930-5604062	IR	3	3	-	AT1G16390.1	-83.23	9.56778e-05	0.000123463	85.7142857142857|90.9090909090909|73.0769230769231	0|0|0	Chr1_5603930_5604062_R_AT1G16390.1_1
Chr2:17194758-17195680	AT2G41230	Chr2:17194897-17195230	IR	3	3	-	Ex.ONT.7823.4	-84.05	4.88004e-06	7.56025e-06	81.6326530612245|89.1025641025641|81.4102564102564	0|0|0	Chr2_17194897_17195230_R_Ex.ONT.7823.4_1
Chr1:28895831-28895988	AT1G76930	Chr1:28895893-28895938	IR	3	3	-	AT1G76930.1	-85.66	1.10847e-06	1.34072e-06	82.7586206896552|88.8888888888889|85.3333333333333	0|0|0	Chr1_28895893_28895938_R_AT1G76930.1_1
Chr2:11070639-11071287	AT2G25964	Chr2:11071052-11071134	IR	3	3	-	AT2G25964.1	-85.67	1.61617e-06	2.26529e-06	87.037037037037|81.8181818181818|88.1578947368421	0|0|0	Chr2_11071052_11071134_R_AT2G25964.1_1
Chr3:7140440-7141228	AT3G20470	Chr3:7140738-7140869	IR	3	3	-	AT3G20470.1	-85.81	1.28495e-07	3.23932e-07	87.7551020408163|84.2105263157895|85.4545454545455	0|0|0	Chr3_7140738_7140869_R_AT3G20470.1_1
Chr3:7140440-7141228	AT3G20470	Chr3:7140708-7140869	IR	3	3	-	AT3G20470.1	-86.14	1.61898e-07	4.08112e-07	88.2352941176471|84.4827586206897|85.7142857142857	0|0|0	Chr3_7140708_7140869_R_AT3G20470.1_1
Chr3:2889489-2890228	AT3G09390	Chr3:2889767-2890150	IR	3	3	-	ONT.10378.2	-86.25	8.82864e-08	1.95468e-07	86.0544217687075|87.987012987013|84.7133757961784	0|0|0	Chr3_2889767_2890150_R_ONT.10378.2_1
Chr3:7140440-7141228	AT3G20470	Chr3:7140692-7140869	IR	3	3	-	AT3G20470.1	-86.48	1.21283e-07	3.0577e-07	88.4615384615385|85|85.9649122807018	0|0|0	Chr3_7140692_7140869_R_AT3G20470.1_1
Chr3:2889489-2890228	AT3G09390	Chr3:2889761-2890144	IR	3	3	-	ONT.10378.2	-86.66	1.11872e-08	2.47717e-08	85.8974358974359|86.3095238095238|87.7742946708464	0|0|0	Chr3_2889761_2890144_R_ONT.10378.2_1
Chr4:2375511-2376360	ONT.13610	Chr4:2375979-2376114	IR	3	3	-	ONT.13610.2	-86.91	4.75559e-08	1.75867e-07	87.5757575757576|87.8706199460916|85.2760736196319	0|0|0	Chr4_2375979_2376114_R_ONT.13610.2_1
Chr3:1848880-1849336	ONT.8320	Chr3:1849037-1849140	IR	3	3	-	Ex.ONT.8320.2	-87.19	2.5906e-06	4.86358e-06	88.3561643835616|90.3508771929825|82.8671328671329	0|0|0	Chr3_1849037_1849140_R_Ex.ONT.8320.2_1
Chr4:2375511-2376360	ONT.13610	Chr4:2376019-2376114	IR	3	3	-	ONT.13610.2	-87.26	5.0643e-09	1.87302e-08	87.5757575757576|87.8706199460916|86.3354037267081	0|0|0	Chr4_2376019_2376114_R_ONT.13610.2_1
Chr2:17194761-17195683	AT2G41230	Chr2:17194897-17195334	IR	3	3	-	Ex.ONT.7823.5	-88.3	1.7604e-06	2.72737e-06	86.2244897959184|92.4107142857143|86.2559241706161	0|0|0	Chr2_17194897_17195334_R_Ex.ONT.7823.5_1
Chr3:7140440-7141228	AT3G20470	Chr3:7140673-7140869	IR	3	3	-	AT3G20470.1	-91.33	1.00763e-07	2.54054e-07	93.4065934065934|90.2173913043478|90.3614457831325	0|0|0	Chr3_7140673_7140869_R_AT3G20470.1_1
Chr3:7140440-7141228	AT3G20470	Chr3:7140672-7140869	IR	3	3	-	AT3G20470.1	-91.33	1.00763e-07	2.54054e-07	93.4065934065934|90.2173913043478|90.3614457831325	0|0|0	Chr3_7140672_7140869_R_AT3G20470.1_1
Chr3:7140440-7141228	AT3G20470	Chr3:7140671-7140868	IR	3	3	-	AT3G20470.1	-91.33	1.00763e-07	2.54054e-07	93.4065934065934|90.2173913043478|90.3614457831325	0|0|0	Chr3_7140671_7140868_R_AT3G20470.1_1
Chr1:28896371-28896883	AT1G76930	Chr1:28896410-28896506	IR	3	3	-	AT1G76930.1	-92.65	4.3713e-07	5.28736e-07	92.9577464788732|95.1219512195122|89.873417721519	0|0|0	Chr1_28896410_28896506_R_AT1G76930.1_1
Chr1:28896371-28896883	AT1G76930	Chr1:28896410-28896458	IR	3	3	-	AT1G76930.1	-92.65	4.3713e-07	5.28736e-07	92.9577464788732|95.1219512195122|89.873417721519	0|0|0	Chr1_28896410_28896458_R_AT1G76930.1_1
Chr3:17157944-17158381	AT3G46600	Chr3:17158210-17158301	IR	3	3	-	AT3G46600.2	-92.95	3.63969e-09	6.69036e-09	93.8628158844765|92.6174496644295|92.3728813559322	0|0|0	Chr3_17158210_17158301_R_AT3G46600.2_1
Chr3:17157944-17158381	AT3G46600	Chr3:17158210-17158297	IR	3	3	-	AT3G46600.2	-92.95	3.63969e-09	6.69036e-09	93.8628158844765|92.6174496644295|92.3728813559322	0|0|0	Chr3_17158210_17158297_R_AT3G46600.2_1
Chr1:26036665-26037648	ONT.2108	Chr1:26037277-26037405	IR	3	3	-	ONT.2108.2	-93.49	4.15019e-11	4.80665e-11	93.75|93.4984520123839|93.2249322493225	0|0|0	Chr1_26037277_26037405_R_ONT.2108.2_1
Chr1:26036665-26037648	ONT.2108	Chr1:26037277-26037399	IR	3	3	-	ONT.2108.2	-93.49	4.15019e-11	4.80665e-11	93.75|93.4984520123839|93.2249322493225	0|0|0	Chr1_26037277_26037399_R_ONT.2108.2_1
Chr3:2889489-2890228	AT3G09390	Chr3:2889905-2890117	IR	3	3	-	ONT.10378.2	-94.41	1.64466e-08	3.64153e-08	93.048128342246|95.0276243093923|95.1612903225807	0|0|0	Chr3_2889905_2890117_R_ONT.10378.2_1
Chr2:9265280-9266371	AT2G21660	Chr2:9265499-9265739	IR	3	3	-	ONT.7034.8	-94.68	3.35084e-11	5.81957e-11	94.4344703770197|94.9386503067485|94.6808510638298	0|0|0	Chr2_9265499_9265739_R_ONT.7034.8_1
Chr5:894708-895381	AT5G03545	Chr5:894994-895057	IR	3	3	-	Ex.ONT.15058.3	-94.91	2.66993e-12	2.9202e-10	94.7826086956522|94.8905109489051|95.049504950495	0|0|0	Chr5_894994_895057_R_Ex.ONT.15058.3_1
Chr5:894707-895388	AT5G03545	Chr5:894994-895049	IR	3	3	-	Ex.ONT.15058.1	-94.91	2.66993e-12	2.9202e-10	94.7826086956522|94.8905109489051|95.049504950495	0|0|0	Chr5_894994_895049_R_Ex.ONT.15058.1_1
Chr2:9265280-9266371	AT2G21660	Chr2:9265503-9265649	IR	3	3	-	ONT.7034.8	-95.09	6.91837e-10	1.20132e-09	94.6735395189003|95.6973293768546|94.8892674616695	0|0|0	Chr2_9265503_9265649_R_ONT.7034.8_1
Chr2:9265280-9266371	AT2G21660	Chr2:9265512-9265640	IR	3	3	-	ONT.7034.8	-96.05	4.41549e-11	7.66822e-11	95.8115183246073|95.9821428571429|96.3478260869565	0|0|0	Chr2_9265512_9265640_R_ONT.7034.8_1
Chr3:17158302-17159965	AT3G46600	Chr3:17158382-17158440	IR	3	3	-	AT3G46600.3	-96.1	5.76584e-10	1.05997e-09	96.309963099631|95.5017301038062|96.4757709251101	0|0|0	Chr3_17158382_17158440_R_AT3G46600.3_1
Chr2:17194988-17195681	AT2G41230	Chr2:17195099-17195230	IR	3	3	-	Ex.ONT.7823.3	-96.17	6.7962e-09	1.05297e-08	96.0264900662252|97.196261682243|95.2789699570815	0|0|0	Chr2_17195099_17195230_R_Ex.ONT.7823.3_1
Chr5:19623481-19624199	ONT.18721	Chr5:19623990-19624089	IR	3	3	-	Ex.ONT.18721.2	-96.8	1.02066e-09	6.10127e-09	97.4522292993631|96.697247706422|96.2546816479401	0|0|0	Chr5_19623990_19624089_R_Ex.ONT.18721.2_1
Chr5:19623481-19624199	ONT.18721	Chr5:19623976-19624089	IR	3	3	-	Ex.ONT.18721.3	-96.8	1.02066e-09	6.10127e-09	97.4522292993631|96.697247706422|96.2546816479401	0|0|0	Chr5_19623976_19624089_R_Ex.ONT.18721.3_1

## Sheet: A v.sC
Event_Region	GeneID	Target_Exon	Event_Type	N	T	Exon_Type	Reference_Transcript	螖PSI(%)	T-test_p-value	FDR(BH)	N_Values	T_Values	DatabaseID
Chr1:23934530-23934712	AT1G64430	Chr1:23934691-23934712	A3SS	3	3	-	ONT.1924.2	28.7	0.000774589	0.000878701	23.1884057971014|26.6666666666667|21.875	57.6923076923077|48.1481481481481|52	Chr1_23934530_23934712_S_ONT.1924.2_1
Chr1:5497102-5497247	AT1G16010	Chr1:5497102-5497117	A3SS	3	3	-	AT1G16010.1	25.24	0.000378613	0.000486966	15.1162790697674|13.6842105263158|8.82352941176471	37.6923076923077|35.6589147286822|40	Chr1_5497102_5497247_S_AT1G16010.1_1
Chr4:16353360-16353610	AT4G34140	Chr4:16353608-16353610	A3SS	3	3	-	AT4G34140.1	25.2	0.000956122	0.00322785	51.5151515151515|43.75|48.1481481481481	73.6842105263158|69.5652173913043|75.7575757575758	Chr4_16353360_16353610_S_AT4G34140.1_1
Chr5:8047776-8047937	AT5G23870	Chr5:8047776-8047795	A3SS	3	3	-	AT5G23870.1	23.86	0.00975091	0.515958	68|57.1428571428571|71.4285714285714	94.7368421052632|85.1851851851852|88.2352941176471	Chr5_8047776_8047937_S_AT5G23870.1_1
Chr4:14974358-14974447	AT4G30720	Chr4:14974358-14974367	A3SS	3	3	-	AT4G30720.1	22.42	0.00298286	0.00934163	47.887323943662|47.7272727272727|48.4848484848485	70.4545454545455|64.4444444444444|76.4705882352941	Chr4_14974358_14974447_S_AT4G30720.1_1
Chr1:24244537-24244800	AT1G65270	Chr1:24244646-24244800	TSS|A3SS	3	3	-	TSS.AT1G65270.3	20.94	0.000539827	0.000614765	10.2325581395349|10.5990783410138|13.963963963964	29.9107142857143|31.981981981982|35.7142857142857	Chr1_24244537_24244800_S_TSS.AT1G65270.3_1
Chr1:24244537-24244794	AT1G65270	Chr1:24244646-24244794	TSS|A3SS	3	3	-	TSS.AT1G65270.3	20.94	0.000539827	0.000614765	10.2325581395349|10.5990783410138|13.963963963964	29.9107142857143|31.981981981982|35.7142857142857	Chr1_24244537_24244794_S_TSS.AT1G65270.3_1
Chr1:6550670-6550762	AT1G18950	Chr1:6550670-6550681	TSS|A5SS	3	3	-	TSS.ONT.754.2	19.95	0.000526342	0.000691707	18.4210526315789|23.8095238095238|19.3548387096774	39.3939393939394|39.4736842105263|42.5531914893617	Chr1_6550670_6550762_S_TSS.ONT.754.2_1
Chr2:6798142-6798526	AT2G15580	Chr2:6798522-6798526	A3SS	3	3	-	AT2G15580.2	19.48	0.00107098	0.00178323	31.6666666666667|30.5084745762712|30.6122448979592	52.1739130434783|53.1645569620253|45.9016393442623	Chr2_6798142_6798526_S_AT2G15580.2_1
Chr2:10205694-10206112	AT2G23985	Chr2:10206104-10206112	TSS|A3SS	3	3	-	TSS.AT2G23985.2	18.79	0.00341818	0.00469299	45.4545454545455|37.7777777777778|46.6666666666667	60|64.1025641025641|62.1621621621622	Chr2_10205694_10206112_S_TSS.AT2G23985.2_1
Chr1:18574759-18576669	AT1G50140	Chr1:18575748-18575813	SES	3	3	-	AT1G50140.1	18.44	0.00433947	0.0046246	41.1764705882353|43.3734939759036|47.945205479452	67.5324675324675|60|60.2941176470588	Chr1_18574759_18576669_W_AT1G50140.1_1
Chr4:17701007-17701223	AT4G37680	Chr4:17701007-17701044	A5SS	3	3	-	ONT.13356.3	18.07	0.00856375	0.0305231	36.8421052631579|47.6190476190476|46.1538461538462	58.6206896551724|61.9047619047619|64.2857142857143	Chr4_17701007_17701223_S_ONT.13356.3_1
Chr1:24366066-24366333	AT1G65540	Chr1:24366066-24366089	TSS|A3SS	3	3	-	TSS.ONT.4505.1	17.37	0.00150997	0.00172375	35.1063829787234|40.7766990291262|34.1666666666667	53.8888888888889|52.6011560693642|55.6650246305419	Chr1_24366066_24366333_S_TSS.ONT.4505.1_1
Chr4:13852342-13852515	AT4G27800	Chr4:13852342-13852415	A3SS	3	3	-	Ex.ONT.14414.4	16.16	0.00989799	0.0298806	74.0740740740741|71.4285714285714|72.3404255319149	86.6666666666667|95.4545454545455|84.2105263157895	Chr4_13852342_13852515_S_Ex.ONT.14414.4_1
Chr4:13662896-13663220	AT4G27270	Chr4:13662896-13662931	TSS|A3SS	3	3	-	TSS.ONT.14389.1	15.7	0.00199213	0.00596903	11.6279069767442|11.6666666666667|15.625	27.6315789473684|26.3157894736842|32.0610687022901	Chr4_13662896_13663220_S_TSS.ONT.14389.1_1
Chr4:16799168-16799455	AT4G35300	Chr4:16799290-16799455	TSS|A5SS	3	3	-	TSS.ONT.14721.2	15.4	0.00682565	0.0234358	3.7037037037037|8.33333333333333|13.3333333333333	25.6756756756757|24.0963855421687|21.7948717948718	Chr4_16799168_16799455_S_TSS.ONT.14721.2_1
Chr4:16799168-16799424	AT4G35300	Chr4:16799290-16799424	TSS|A5SS	3	3	-	TSS.ONT.14721.2	15.4	0.00682565	0.0234358	3.7037037037037|8.33333333333333|13.3333333333333	25.6756756756757|24.0963855421687|21.7948717948718	Chr4_16799168_16799424_S_TSS.ONT.14721.2_1
Chr2:15052454-15052681	AT2G35830	Chr2:15052667-15052681	TSS|A3SS	3	3	-	TSS.AT2G35830.2	15.32	0.00134739	0.00199964	47.3684210526316|43.5643564356436|44.9704142011834	59.0163934426229|63.768115942029|59.0909090909091	Chr2_15052454_15052681_S_TSS.AT2G35830.2_1
Chr4:1228012-1228662	AT4G02760	Chr4:1228012-1228236	TSS|A3SS	3	3	-	TSS.AT4G02760.2	14.07	0.00165489	0.00469037	0|5.26315789473684|0	16.6666666666667|16.2162162162162|14.5833333333333	Chr4_1228012_1228662_S_TSS.AT4G02760.2_1
Chr5:6213068-6213279	AT5G18640	Chr5:6213068-6213160	A5SS	3	3	-	Ex.TSS.AT5G18640.1	13.85	0.000957291	0.02301	77.6470588235294|78.021978021978|75.609756097561	93.7062937062937|90|89.1304347826087	Chr5_6213068_6213279_S_Ex.TSS.AT5G18640.1_1
Chr3:14917378-14918477	ONT.9295	Chr3:14918163-14918250	MXS	3	3	-	ONT.9295.1	13.69	0.00684738	0.01238	18.6915887850467|14.8648648648649|19.2893401015228	35.2380952380952|27.3356401384083|31.3380281690141	Chr3_14917378_14918477_W_ONT.9295.1_1
Chr5:25985003-25985121	AT5G65050	Chr5:25985089-25985121	A3SS	3	3	-	Ex.AT5G65050.1	13.62	0.000940252	0.00961399	72.972972972973|70|68.4210526315789	82.5396825396825|85.2272727272727|84.4827586206897	Chr5_25985003_25985121_S_Ex.AT5G65050.1_1
Chr2:201489-201683	AT2G01450	Chr2:201605-201683	A5SS	3	3	-	AT2G01450.1	13.37	0.00875508	0.0142671	80.794701986755|76.6497461928934|72.020725388601	91.6666666666667|90.2542372881356|87.6447876447876	Chr2_201489_201683_S_AT2G01450.1_1
Chr4:18030303-18030468	AT4G38560	Chr4:18030303-18030308	TSS|A5SS	3	3	-	TSS.AT4G38560.2	13.32	0.00553108	0.0199851	0|4|0	12.6984126984127|12.5|18.75	Chr4_18030303_18030468_S_TSS.AT4G38560.2_1
Chr5:17678606-17678677	AT5G43930	Chr5:17678672-17678677	A3SS	3	3	-	AT5G43930.4	13.24	0.000414846	0.00225719	0|0|3.33333333333333	13.8888888888889|13.7931034482759|15.3846153846154	Chr5_17678606_17678677_S_AT5G43930.4_1
Chr3:6035541-6035687	AT3G17650	Chr3:6035668-6035687	A3SS	3	3	-	AT3G17650.1	13.23	0.00804568	0.0195512	68.6131386861314|62.2754491017964|66.6666666666667	82.7956989247312|76.2376237623762|78.2051282051282	Chr3_6035541_6035687_S_AT3G17650.1_1
Chr2:17377566-17377929	AT2G41680	Chr2:17377566-17377588	A3SS	3	3	-	ONT.7842.1	12.98	0.00145795	0.00225765	5.08474576271187|10.3225806451613|9.70873786407767	21.6981132075472|21.0526315789474|21.2962962962963	Chr2_17377566_17377929_S_ONT.7842.1_1
Chr2:11696800-11697647	AT2G27340	Chr2:11697449-11697554	SES	3	3	-	AT2G27340.3	12.63	0.00140963	0.00199873	1.88679245283019|4.65116279069767|3.17460317460317	13.1578947368421|16.6666666666667|17.7777777777778	Chr2_11696800_11697647_W_AT2G27340.3_1
Chr4:10588973-10589071	AT4G19420	Chr4:10588973-10588992	A3SS	3	3	-	AT4G19420.1	12.58	0.00180828	0.00490857	70.5882352941177|75.7575757575758|75	86.5853658536585|85.2941176470588|87.2093023255814	Chr4_10588973_10589071_S_AT4G19420.1_1
Chr2:18701146-18701536	AT2G45380	Chr2:18701241-18701377	SES	3	3	-	ONT.7995.2	12.34	0.00252625	0.00401054	6.10932475884244|7.73809523809524|8.40336134453782	19.2982456140351|17.0731707317073|22.9074889867841	Chr2_18701146_18701536_W_ONT.7995.2_1
Chr5:20789688-20789837	AT5G51150	Chr5:20789827-20789837	A3SS	3	3	-	AT5G51150.1	12.3	0.00232976	0.0151054	84.9315068493151|86.5853658536585|80.9523809523809	95.5555555555556|96.1538461538462|97.6744186046512	Chr5_20789688_20789837_S_AT5G51150.1_1
Chr4:14265758-14266535	AT4G28910	Chr4:14266023-14266105	SES	3	3	-	AT4G28910.2	12.02	0.0021414	0.00657344	45.4545454545455|40.7725321888412|42.7293064876958	56.7510548523207|53.1746031746032|55.0827423167849	Chr4_14265758_14266535_W_AT4G28910.2_1
Chr2:12752840-12753056	AT2G29910	Chr2:12752974-12753056	TSS|A5SS	3	3	-	TSS.AT2G29910.1	11.95	0.00133126	0.00191051	82.051282051282|85.1851851851852|83.3333333333333	95.6521739130435|97.4358974358974|93.3333333333333	Chr2_12752840_12753056_S_TSS.AT2G29910.1_1
Chr3:2645309-2645526	AT3G08710	Chr3:2645309-2645409	A5SS	3	3	-	Ex.TSS.AT3G08710.1	11.56	0.00181016	0.0039575	31.1475409836066|27.2058823529412|26.0162601626016	40.0990099009901|39.6694214876033|39.2712550607287	Chr3_2645309_2645526_S_Ex.TSS.AT3G08710.1_1
Chr5:24653753-24654844	AT5G61310	Chr5:24654770-24654844	A5SS	3	3	-	AT5G61310.3	11.43	0.00734923	0.0643954	17.0731707317073|9.67741935483871|13.8888888888889	24.4444444444444|24|26.4705882352941	Chr5_24653753_24654844_S_AT5G61310.3_1
Chr5:24653753-24654795	AT5G61310	Chr5:24654770-24654795	A5SS	3	3	-	Ex.AT5G61310.3	11.43	0.00734923	0.0643954	17.0731707317073|9.67741935483871|13.8888888888889	24.4444444444444|24|26.4705882352941	Chr5_24653753_24654795_S_Ex.AT5G61310.3_1
Chr2:18701146-18701536	AT2G45380	Chr2:18701241-18701536	A5SS	3	3	-	ONT.7995.10	11.31	0.00231559	0.00367626	4.08163265306122|6.28930817610063|7.87878787878788	19.4174757281553|17.5438596491228|15.2173913043478	Chr2_18701146_18701536_S_ONT.7995.10_1
Chr3:23264239-23264638	AT3G62940	Chr3:23264239-23264254	TSS|A3SS	3	3	-	TSS.AT3G62940.2	11.28	0.000700944	0.00151266	25.7142857142857|27.2727272727273|26.6666666666667	40|36.3636363636364|37.1428571428571	Chr3_23264239_23264638_S_TSS.AT3G62940.2_1
Chr1:18574759-18576669	AT1G50140	Chr1:18575740-18575813	SES	3	3	-	ONT.4031.2	11.17	0.00436609	0.00465285	35.2941176470588|31.3253012048193|30.1369863013699	42.8571428571429|41.8181818181818|45.5882352941176	Chr1_18574759_18576669_W_ONT.4031.2_1
Chr3:18935888-18936115	AT3G50950	Chr3:18936110-18936115	A3SS	3	3	-	Ex.AT3G50950.2	10.49	0.00185229	0.00350426	29.5302013422819|25.748502994012|26.6187050359712	39.5104895104895|37.0860927152318|36.7781155015198	Chr3_18935888_18936115_S_Ex.AT3G50950.2_1
Chr4:15355724-15356190	AT4G31720	Chr4:15355724-15355740	TSS|A3SS	3	3	-	TSS.AT4G31720.1	10.28	0.000552042	0.0017613	60.1818181818182|60.9507640067912|60.1973684210526	72.0321931589537|71.3646532438479|68.780487804878	Chr4_15355724_15356190_S_TSS.AT4G31720.1_1
Chr5:23554941-23555155	AT5G58220	Chr5:23554941-23554979	TSS|A3SS	3	3	-	TSS.AT5G58220.1	10.05	0.000924257	0.00730698	40.0778210116732|40.1898734177215|38.7096774193548	51.2755102040816|50.1187648456057|47.741935483871	Chr5_23554941_23555155_S_TSS.AT5G58220.1_1
Chr5:24091334-24092116	ONT.19132	Chr5:24091492-24091570	IR (overlapping region)	3	3	-	ONT.19132.1	-10.04	0.0017963	0.0150375	11.3636363636364|7.31707317073171|11.4285714285714	0|0|0	Chr5_24091492_24091570_R_ONT.19132.1_1
Chr3:19207281-19208448	ONT.9572	Chr3:19207462-19207538	IR (overlapping region)	3	3	-	ONT.9572.1	-10.04	0.000151851	0.000289045	8.7719298245614|11.2582781456954|10.0917431192661	0|0|0	Chr3_19207462_19207538_R_ONT.9572.1_1
Chr3:14309550-14311212	AT3G42150	Chr3:14310554-14311212	A3SS	3	3	-	ONT.9290.4	-10.17	0.00182635	0.00329233	89.5652173913044|92.5373134328358|91.0344827586207	78.7096774193548|82.0987654320988|81.8181818181818	Chr3_14309550_14311212_S_ONT.9290.4_1
Chr3:23262950-23264238	AT3G62940	Chr3:23263998-23264138	IR	3	3	-	Ex.AT3G62940.1	-10.24	0.000353341	0.000762566	11.7647058823529|8.62068965517241|10.3448275862069	0|0|0	Chr3_23263998_23264138_R_Ex.AT3G62940.1_1
Chr2:10066163-10067734	AT2G23680	Chr2:10066361-10066452	IR	3	3	-	ONT.5655.5	-10.26	0.00150296	0.00206357	10.958904109589|7.69230769230769|12.1212121212121	0|0|0	Chr2_10066361_10066452_R_ONT.5655.5_1
Chr2:10066163-10067734	AT2G23680	Chr2:10066359-10066452	IR	3	3	-	ONT.5655.5	-10.26	0.00150296	0.00206357	10.958904109589|7.69230769230769|12.1212121212121	0|0|0	Chr2_10066359_10066452_R_ONT.5655.5_1
Chr1:9482560-9482912	AT1G27290	Chr1:9482621-9482636	IR	3	3	-	AT1G27290.1	-10.42	4.48572e-05	6.16e-05	9.60698689956332|11.4630467571644|10.1973684210526	0|0|0	Chr1_9482621_9482636_R_AT1G27290.1_1
Chr5:10293044-10295261	ONT.15976	Chr5:10294254-10294706	IR (overlapping region)	3	3	-	ONT.15976.2	-10.47	0.00179954	0.00816857	9.2896174863388|13.2947976878613|8.82352941176471	0|0|0	Chr5_10294254_10294706_R_ONT.15976.2_1
Chr5:24251319-24251613	AT5G60230	Chr5:24251437-24251521	IR (overlapping region)	3	3	-	AT5G60230.1	-10.49	0.0088362	0.0750594	6.66666666666667|10.5263157894737|14.2857142857143	0|0|0	Chr5_24251437_24251521_R_AT5G60230.1_1
Chr4:241156-241458	AT4G00560	Chr4:241156-241370	A3SS	3	3	-	AT4G00560.3	-10.52	0.000434269	0.00162554	84.037558685446|84.7826086956522|84.0182648401826	73.6842105263158|75.4385964912281|72.1428571428571	Chr4_241156_241458_S_AT4G00560.3_1
Chr1:1477462-1478870	ONT.2770	Chr1:1477744-1478757	IR	3	3	-	Ex.ONT.2770.11	-10.54	0.00334661	0.00339229	8.25688073394496|9.52380952380952|13.8297872340426	0|0|0	Chr1_1477744_1478757_R_Ex.ONT.2770.11_1
Chr1:1477461-1478879	ONT.2770	Chr1:1477744-1478755	IR	3	3	-	Ex.ONT.2770.7	-10.54	0.00334661	0.00339229	8.25688073394496|9.52380952380952|13.8297872340426	0|0|0	Chr1_1477744_1478755_R_Ex.ONT.2770.7_1
Chr5:8794252-8796688	AT5G25350	Chr5:8794404-8794494	IR (overlapping region)	3	3	-	AT5G25350.1	-10.63	0.002217	0.198271	8.23529411764706|13.4570765661253|10.1941747572816	0|0|0	Chr5_8794404_8794494_R_AT5G25350.1_1
Chr5:8794252-8796688	AT5G25350	Chr5:8794403-8794496	IR (overlapping region)	3	3	-	AT5G25350.1	-10.63	0.002217	0.198271	8.23529411764706|13.4570765661253|10.1941747572816	0|0|0	Chr5_8794403_8794496_R_AT5G25350.1_1
Chr3:14309550-14311212	AT3G42150	Chr3:14310554-14310649	SES	3	3	-	ONT.9290.1	-10.65	0.00229969	0.00414542	69.8198198198198|69.1449814126394|67.7083333333333	57.3333333333333|61.0062893081761|56.3829787234042	Chr3_14309550_14311212_W_ONT.9290.1_1
Chr5:9490216-9490404	AT5G26980	Chr5:9490216-9490220	TSS|A3SS	3	3	-	TSS.AT5G26980.1	-10.73	0.00568856	1	95|89.7435897435898|88.5714285714286	80|80.4878048780488|80.6451612903226	Chr5_9490216_9490404_S_TSS.AT5G26980.1_1
Chr3:22603018-22604554	AT3G61060	Chr3:22603493-22603580	IR	3	3	-	ONT.9933.4	-10.77	0.000431235	0.00091497	8.97435897435897|12.4542124542125|10.8949416342412	0|0|0	Chr3_22603493_22603580_R_ONT.9933.4_1
Chr3:22602919-22603702	AT3G61060	Chr3:22603493-22603583	IR	3	3	-	Ex.AT3G61060.1	-10.77	0.000431235	0.00091497	8.97435897435897|12.4542124542125|10.8949416342412	0|0|0	Chr3_22603493_22603583_R_Ex.AT3G61060.1_1
Chr1:11134126-11134341	AT1G31170	Chr1:11134213-11134341	TSS|A3SS	3	3	-	TSS.AT1G31170.1	-10.77	0.000556016	0.000570589	96.4912280701754|95.4983922829582|98.1566820276498	87.2146118721461|85.981308411215|84.641638225256	Chr1_11134126_11134341_S_TSS.AT1G31170.1_1
Chr5:26421864-26423489	AT5G66070	Chr5:26422050-26422168	IR	3	3	-	ONT.17164.4	-10.8	0.00213994	0.0231414	11.1111111111111|8|13.28125	0|0|0	Chr5_26422050_26422168_R_ONT.17164.4_1
Chr4:18014797-18015065	AT4G38510	Chr4:18014903-18014975	SES	3	3	-	AT4G38510.3	-10.86	0.00797239	0.0288034	60.6118546845124|64.2201834862385|68.2186234817814	53.8759689922481|53.0379746835443|53.5612535612536	Chr4_18014797_18015065_W_AT4G38510.3_1
Chr2:9737612-9738298	AT2G22860	Chr2:9737789-9737936	IR	3	3	-	ONT.5621.2	-10.89	0.000468733	0.000819389	9.22330097087379|10.6382978723404|12.7962085308057	0|0|0	Chr2_9737789_9737936_R_ONT.5621.2_1
Chr3:19822745-19823406	AT3G53470	Chr3:19822943-19823017	IR	3	3	-	Ex.AT3G53470.2	-10.92	4.88058e-06	9.47756e-06	10.5820105820106|11.5819209039548|10.6109324758842	0|0|0	Chr3_19822943_19823017_R_Ex.AT3G53470.2_1
Chr3:19822726-19823493	AT3G53470	Chr3:19822943-19823020	IR	3	3	-	Ex.AT3G53470.1	-10.92	4.88058e-06	9.47756e-06	10.5820105820106|11.5819209039548|10.6109324758842	0|0|0	Chr3_19822943_19823020_R_Ex.AT3G53470.1_1
Chr3:11383267-11383992	AT3G29575	Chr3:11383662-11383923	IR	3	3	-	Ex.AT3G29575.4	-10.95	0.00835783	0.0148869	6.89655172413793|14.7058823529412|11.25	0|0|0	Chr3_11383662_11383923_R_Ex.AT3G29575.4_1
Chr3:3931580-3933350	AT3G12350	Chr3:3932457-3932666	IR	3	3	-	ONT.8562.3	-11.05	0.00552074	0.0125848	7.14285714285714|13.953488372093|12.0481927710843	0|0|0	Chr3_3932457_3932666_R_ONT.8562.3_1
Chr2:15605889-15607840	AT2G37150	Chr2:15605994-15607694	IR	3	3	-	Ex.AT2G37150.2	-11.11	0.00330812	0.00496192	12|13.6363636363636|7.69230769230769	0|0|0	Chr2_15605994_15607694_R_Ex.AT2G37150.2_1
Chr5:15879573-15881023	AT5G39660	Chr5:15880780-15880987	IR	3	3	-	AT5G39660.1	-11.18	0.00313861	0.0144449	13.3333333333333|12.5|7.69230769230769	0|0|0	Chr5_15880780_15880987_R_AT5G39660.1_1
Chr1:27232546-27232878	AT1G72320	Chr1:27232546-27232610	TSS|A3SS	3	3	-	TSS.AT1G72320.1	-11.22	0.00375781	0.00442783	88|87.7551020408163|93.2203389830508	77.5|79.2452830188679|78.5714285714286	Chr1_27232546_27232878_S_TSS.AT1G72320.1_1
Chr1:27232537-27232878	AT1G72320	Chr1:27232537-27232610	TSS|A3SS	3	3	-	TSS.AT1G72320.1	-11.22	0.00375781	0.00442783	88|87.7551020408163|93.2203389830508	77.5|79.2452830188679|78.5714285714286	Chr1_27232537_27232878_S_TSS.AT1G72320.1_1
Chr4:241156-241458	AT4G00560	Chr4:241247-241370	SES	3	3	-	AT4G00560.1	-11.32	0.000261834	0.000980283	82.3943661971831|81.9565217391304|82.3798627002288	70.7602339181287|72.5947521865889|69.4244604316547	Chr4_241156_241458_W_AT4G00560.1_1
Chr2:13672250-13673256	AT2G32180	Chr2:13672809-13673187	IR	3	3	-	Ex.AT2G32180.1	-11.32	3.48725e-05	5.08292e-05	10.4417670682731|12.3552123552124|11.1607142857143	0|0|0	Chr2_13672809_13673187_R_Ex.AT2G32180.1_1
Chr2:18700898-18701536	AT2G45380	Chr2:18701098-18701145	SES	3	3	-	AT2G45380.1	-11.38	0.00531459	0.00843225	74.8490945674044|74.4227353463588|70.5372616984402	61.4255765199161|64.7749510763209|59.4810379241517	Chr2_18700898_18701536_W_AT2G45380.1_1
Chr2:13678255-13678719	AT2G32210	Chr2:13678394-13678508	IR	3	3	-	ONT.5958.2	-11.38	0.00462338	0.00673788	8.64197530864197|10.2564102564103|15.2542372881356	0|0|0	Chr2_13678394_13678508_R_ONT.5958.2_1
Chr2:13677991-13678723	AT2G32210	Chr2:13678112-13678254	IR	3	3	-	ONT.5958.3	-11.38	0.00462338	0.00673788	8.64197530864197|10.2564102564103|15.2542372881356	0|0|0	Chr2_13678112_13678254_R_ONT.5958.3_1
Chr2:13677991-13678723	AT2G32210	Chr2:13678108-13678254	IR	3	3	-	ONT.5958.3	-11.38	0.00462338	0.00673788	8.64197530864197|10.2564102564103|15.2542372881356	0|0|0	Chr2_13678108_13678254_R_ONT.5958.3_1
Chr1:7088015-7089210	AT1G20450	Chr1:7088688-7088777	IR (overlapping region)	3	3	-	ONT.3399.1	-11.39	0.00337739	0.00446607	8.98692810457516|10.2040816326531|14.975845410628	0|0|0	Chr1_7088688_7088777_R_ONT.3399.1_1
Chr5:1883513-1883709	AT5G06220	Chr5:1883513-1883516	A5SS	3	3	-	Ex.AT5G06220.1	-11.42	0.00307123	0.0176802	32.8571428571429|27.4725274725275|32.3529411764706	18.9189189189189|19.047619047619|20.4545454545455	Chr5_1883513_1883709_S_Ex.AT5G06220.1_1
Chr5:2204248-2205715	AT5G07100	Chr5:2204466-2204607	IR	3	3	-	ONT.15208.4	-11.44	0.00678961	0.048089	15.1785714285714|11.6788321167883|7.47663551401869	0|0|0	Chr5_2204466_2204607_R_ONT.15208.4_1
Chr1:27118485-27119147	AT1G72060	Chr1:27118537-27118640	IR	3	3	-	ONT.2226.3	-11.44	9.12844e-05	0.000107477	12.0192307692308|12.2831367106176|10.0065402223676	0|0|0	Chr1_27118537_27118640_R_ONT.2226.3_1
Chr3:2423376-2423602	AT3G07590	Chr3:2423454-2423526	SES	3	3	-	ONT.8382.1	-11.47	0.00468544	0.0101881	31.0606060606061|28.8|25.4901960784314	19.2139737991266|16.6037735849057|15.1111111111111	Chr3_2423376_2423602_W_ONT.8382.1_1
Chr1:27118485-27119147	AT1G72060	Chr1:27118537-27118652	IR	3	3	-	ONT.2226.3	-11.56	8.98513e-05	0.000105793	12.1295658166782|12.4305555555556|10.1241018941868	0|0|0	Chr1_27118537_27118652_R_ONT.2226.3_1
Chr4:11859004-11860208	AT4G22530	Chr4:11859883-11859979	IR	3	3	-	Ex.AT4G22530.1	-11.6	0.000139201	0.000389689	10.3092783505155|11.3821138211382|13.0952380952381	0|0|0	Chr4_11859883_11859979_R_Ex.AT4G22530.1_1
Chr4:13025274-13026055	AT4G25500	Chr4:13025600-13025856	SES	3	3	-	AT4G25500.3	-11.62	0.00319168	0.00932133	34.5971563981043|29.1946308724832|29.3478260869565	19.6787148594378|20.0787401574803|18.5185185185185	Chr4_13025274_13026055_W_AT4G25500.3_1
Chr4:10393674-10393767	AT4G18975	Chr4:10393674-10393695	TSS|A3SS	3	3	-	TSS.AT4G18975.4	-11.65	0.00970974	0.0262003	61.9047619047619|58.5585585585586|54.7945205479452	46.7532467532467|44.2857142857143|49.2753623188406	Chr4_10393674_10393767_S_TSS.AT4G18975.4_1
Chr2:1547538-1548999	ONT.6742	Chr2:1548253-1548938	IR	3	3	-	ONT.6742.2	-11.66	0.000462511	0.000692313	13.8461538461538|10.2564102564103|10.8695652173913	0|0|0	Chr2_1548253_1548938_R_ONT.6742.2_1
Chr5:310086-312097	AT5G01810	Chr5:311309-311443	IR	3	3	-	AT5G01810.1	-11.7	0.000917953	0.0116886	11.6279069767442|9.43396226415094|14.0350877192982	0|0|0	Chr5_311309_311443_R_AT5G01810.1_1
Chr3:6170292-6171608	ONT.8814	Chr3:6171263-6171348	IR (overlapping region)	3	3	-	ONT.8814.1	-11.71	0.000425424	0.0010369	11.2244897959184|10.1123595505618|13.7931034482759	0|0|0	Chr3_6171263_6171348_R_ONT.8814.1_1
Chr2:19614698-19615769	AT2G47910	Chr2:19614937-19615014	IR (overlapping region)	3	3	-	AT2G47910.2	-11.74	0.000286979	0.000465822	13.4920634920635|10.0719424460432|11.6666666666667	0|0|0	Chr2_19614937_19615014_R_AT2G47910.2_1
Chr4:13839101-13839781	AT4G27740	Chr4:13839238-13839391	IR	3	3	-	ONT.12926.3	-11.76	0.000837512	0.00249492	10.6060606060606|10.3139013452915|14.3646408839779	0|0|0	Chr4_13839238_13839391_R_ONT.12926.3_1
Chr4:13839075-13839763	AT4G27740	Chr4:13839241-13839391	IR	3	3	-	Ex.AT4G27740.1	-11.76	0.000837512	0.00249492	10.6060606060606|10.3139013452915|14.3646408839779	0|0|0	Chr4_13839241_13839391_R_Ex.AT4G27740.1_1
Chr5:25736689-25737608	AT5G64360	Chr5:25736891-25737203	IR	3	3	-	Ex.AT5G64360.1	-11.78	0.00209117	0.0202618	9.09090909090909|11.4285714285714|14.8148148148148	0|0|0	Chr5_25736891_25737203_R_Ex.AT5G64360.1_1
Chr1:9067522-9068207	AT1G26210	Chr1:9067842-9068056	IR	3	3	-	AT1G26210.1	-11.88	0.00173874	0.00237863	9.75609756097561|15|10.8695652173913	0|0|0	Chr1_9067842_9068056_R_AT1G26210.1_1
Chr1:9067522-9068207	AT1G26210	Chr1:9067838-9068056	IR	3	3	-	AT1G26210.1	-11.88	0.00173874	0.00237863	9.75609756097561|15|10.8695652173913	0|0|0	Chr1_9067838_9068056_R_AT1G26210.1_1
Chr5:2330399-2332281	AT5G07370	Chr5:2330498-2330784	IR	3	3	-	AT5G07370.4	-11.91	0.000818251	0.00629772	9.32642487046632|12.8205128205128|13.5964912280702	0|0|0	Chr5_2330498_2330784_R_AT5G07370.4_1
Chr4:13839101-13839781	AT4G27740	Chr4:13839212-13839391	IR	3	3	-	ONT.12926.3	-11.91	0.000667262	0.00198822	11.0552763819095|10.3139013452915|14.3646408839779	0|0|0	Chr4_13839212_13839391_R_ONT.12926.3_1
Chr1:24951241-24953921	AT1G66880	Chr1:24952059-24953891	IR	3	3	-	Ex.ONT.2011.5	-11.93	0.00270401	0.00310714	15.3846153846154|9.30232558139535|11.1111111111111	0|0|0	Chr1_24952059_24953891_R_Ex.ONT.2011.5_1
Chr1:2877678-2879182	AT1G08940	Chr1:2878151-2878715	IR (overlapping region)	3	3	-	ONT.319.2	-11.94	0.00400443	0.00482513	12|8.43373493975904|15.3846153846154	0|0|0	Chr1_2878151_2878715_R_ONT.319.2_1
Chr4:241156-241253	AT4G00560	Chr4:241247-241253	A5SS	3	3	-	Ex.AT4G00560.1	-11.99	0.000308414	0.00115456	80.7511737089202|79.1304347826087|80.365296803653	67.8362573099415|69.7674418604651|66.6666666666667	Chr4_241156_241253_S_Ex.AT4G00560.1_1
Chr1:25453929-25455748	AT1G67880	Chr1:25455182-25455381	IR	3	3	-	ONT.4598.2	-12.03	0.00682342	0.0078847	9.09090909090909|10.3448275862069|16.6666666666667	0|0|0	Chr1_25455182_25455381_R_ONT.4598.2_1
Chr1:9611877-9612589	AT1G27630	Chr1:9611877-9612429	A5SS	3	3	-	ONT.1047.1	-12.05	0.00998385	0.0137415	44.2307692307692|46.4285714285714|48.936170212766	35.2941176470588|30.2631578947368|37.8787878787879	Chr1_9611877_9612589_S_ONT.1047.1_1
Chr1:7768043-7770135	AT1G22040	Chr1:7768052-7768345	IR	3	3	-	ONT.874.3	-12.05	0.0034789	0.00465017	10.6382978723404|9.61538461538462|15.9090909090909	0|0|0	Chr1_7768052_7768345_R_ONT.874.3_1
Chr1:8977599-8978222	ONT.3565	Chr1:8977600-8977684	IR (overlapping region)	3	3	-	ONT.3565.1	-12.2	3.46487e-05	4.73491e-05	12.4161073825503|13.1147540983607|11.0687022900763	0|0|0	Chr1_8977600_8977684_R_ONT.3565.1_1
Chr5:22478232-22479703	ONT.16730	Chr5:22478494-22479469	IR	3	3	-	ONT.16730.3	-12.21	0.00330961	0.024234	9.52380952380952|16|11.1111111111111	0|0|0	Chr5_22478494_22479469_R_ONT.16730.3_1
Chr5:22478232-22479703	ONT.16730	Chr5:22478494-22479190	IR	3	3	-	ONT.16730.3	-12.21	0.00330961	0.024234	9.52380952380952|16|11.1111111111111	0|0|0	Chr5_22478494_22479190_R_ONT.16730.3_1
Chr3:17576991-17579580	AT3G47675	Chr3:17577063-17578687	IR	3	3	-	Ex.ONT.11344.2	-12.25	0.000195185	0.000362191	11.5384615384615|11.1111111111111|14.1025641025641	0|0|0	Chr3_17577063_17578687_R_Ex.ONT.11344.2_1
Chr1:24952750-24953921	AT1G66880	Chr1:24953678-24953891	IR	3	3	-	Ex.ONT.2011.7	-12.38	0.000957185	0.00109992	10.8108108108108|15.2173913043478|11.1111111111111	0|0|0	Chr1_24953678_24953891_R_Ex.ONT.2011.7_1
Chr4:10302417-10302584	AT4G18730	Chr4:10302578-10302584	A3SS	3	3	-	Ex.TSS.ONT.12583.4	-12.39	0.000214783	0.000578128	11.1111111111111|14.2857142857143|11.7647058823529	0|0|0	Chr4_10302417_10302584_S_Ex.TSS.ONT.12583.4_1
Chr2:12338645-12338769	AT2G28760	Chr2:12338740-12338769	TSS|A5SS	3	3	-	TSS.AT2G28760.1	-12.5	0.00450354	0.0064263	23.0769230769231|21.4285714285714|23.0769230769231	7.2463768115942|14.1414141414141|8.69565217391304	Chr2_12338645_12338769_S_TSS.AT2G28760.1_1
Chr4:12164275-12165016	AT4G23250	Chr4:12164784-12164862	IR	3	3	-	Ex.ONT.14231.1	-12.54	0.000644662	0.00181632	13.3333333333333|14.2857142857143|10	0|0|0	Chr4_12164784_12164862_R_Ex.ONT.14231.1_1
Chr1:29524586-29526241	AT1G78480	Chr1:29525702-29526046	IR (overlapping region)	3	3	-	Ex.ONT.5014.1	-12.55	0.00614146	0.00745934	8|13.6363636363636|16	0|0|0	Chr1_29525702_29526046_R_Ex.ONT.5014.1_1
Chr5:19334006-19334111	AT5G47720	Chr5:19334006-19334027	TSS|A5SS	3	3	-	TSS.AT5G47720.1	-12.58	0.00839017	0.0496812	48.3333333333333|45.6140350877193|48.0769230769231	29.8701298701299|37.5|36.9047619047619	Chr5_19334006_19334111_S_TSS.AT5G47720.1_1
Chr2:19240338-19241767	AT2G46810	Chr2:19240816-19241167	IR	3	3	-	Ex.ONT.6562.2	-12.58	0.000497998	0.00080223	15|11.6279069767442|11.1111111111111	0|0|0	Chr2_19240816_19241167_R_Ex.ONT.6562.2_1
Chr2:19240318-19241767	AT2G46810	Chr2:19240811-19241167	IR	3	3	-	Ex.ONT.6562.1	-12.58	0.000497998	0.00080223	15|11.6279069767442|11.1111111111111	0|0|0	Chr2_19240811_19241167_R_Ex.ONT.6562.1_1
Chr3:17577348-17579577	AT3G47680	Chr3:17578462-17578687	IR (overlapping region)	3	3	-	Ex.ONT.11344.7	-12.61	8.09094e-05	0.000150145	11.5384615384615|12.1951219512195|14.1025641025641	0|0|0	Chr3_17578462_17578687_R_Ex.ONT.11344.7_1
Chr3:17577154-17578778	AT3G47675	Chr3:17577184-17578687	IR	3	3	-	Ex.ONT.11344.1	-12.61	8.09094e-05	0.000150145	11.5384615384615|12.1951219512195|14.1025641025641	0|0|0	Chr3_17577184_17578687_R_Ex.ONT.11344.1_1
Chr3:7838884-7839467	AT3G22210	Chr3:7839249-7839335	IR	3	3	-	ONT.10921.1	-12.65	0.000338625	0.000860636	14.3805309734513|12.9896907216495|10.5793450881612	0|0|0	Chr3_7839249_7839335_R_ONT.10921.1_1
Chr2:2861784-2863509	ONT.6777	Chr2:2862154-2862284	IR	3	3	-	ONT.6777.2	-12.67	0.00153686	0.00252322	12.4293785310734|9.95024875621891|15.6424581005587	0|0|0	Chr2_2862154_2862284_R_ONT.6777.2_1
Chr4:9291153-9293290	ONT.13960	Chr4:9291789-9291877	IR (overlapping region)	3	3	-	ONT.13960.1	-12.72	0.00351191	0.0152841	8.69565217391304|15.5172413793103|13.953488372093	0|0|0	Chr4_9291789_9291877_R_ONT.13960.1_1
Chr1:29525501-29525860	AT1G78480	Chr1:29525702-29525784	IR (overlapping region)	3	3	-	Ex.AT1G78480.1	-12.77	0.00734341	0.00891894	8|13.6363636363636|16.6666666666667	0|0|0	Chr1_29525702_29525784_R_Ex.AT1G78480.1_1
Chr5:8228892-8229285	AT5G24230	Chr5:8228975-8229152	IR	3	3	-	Ex.AT5G24230.1	-12.87	0.00479589	0.255902	15.3846153846154|8.33333333333333|14.8936170212766	0|0|0	Chr5_8228975_8229152_R_Ex.AT5G24230.1_1
Chr4:8526427-8528010	AT4G14905	Chr4:8526616-8526851	IR	3	3	-	AT4G14905.2	-12.9	0.00894289	0.0181613	8.51063829787234|17.8571428571429|12.3287671232877	0|0|0	Chr4_8526616_8526851_R_AT4G14905.2_1
Chr4:18289060-18289856	AT4G39320	Chr4:18289234-18289333	IR	3	3	-	ONT.13418.3	-12.9	0.00556222	0.0203622	10.5263157894737|10.5263157894737|17.6470588235294	0|0|0	Chr4_18289234_18289333_R_ONT.13418.3_1
Chr3:19324169-19324469	AT3G52105	Chr3:19324361-19324458	IR (overlapping region)	3	3	-	ONT.9587.3	-12.95	0.00232287	0.00445065	16|9.52380952380952|13.3333333333333	0|0|0	Chr3_19324361_19324458_R_ONT.9587.3_1
Chr4:15854318-15854709	AT4G32850	Chr4:15854440-15854546	IR	3	3	-	Ex.AT4G32850.2	-12.98	5.83468e-05	0.000191712	12.9032258064516|14.2857142857143|11.7647058823529	0|0|0	Chr4_15854440_15854546_R_Ex.AT4G32850.2_1
Chr1:20803704-20804573	AT1G55675	Chr1:20803961-20804302	IR	3	3	-	AT1G55675.1	-13.17	0.000785301	0.000861234	15.5737704918033|10.6060606060606|13.3333333333333	0|0|0	Chr1_20803961_20804302_R_AT1G55675.1_1
Chr3:1754687-1755631	AT3G05870	Chr3:1755053-1755591	IR	3	3	-	Ex.AT3G05870.1	-13.37	0.00992686	0.0184063	9.52380952380952|19.047619047619|11.5384615384615	0|0|0	Chr3_1755053_1755591_R_Ex.AT3G05870.1_1
Chr3:1754687-1755631	AT3G05870	Chr3:1755026-1755591	IR	3	3	-	Ex.AT3G05870.2	-13.37	0.00992686	0.0184063	9.52380952380952|19.047619047619|11.5384615384615	0|0|0	Chr3_1755026_1755591_R_Ex.AT3G05870.2_1
Chr5:4041120-4042074	AT5G12440	Chr5:4041346-4042037	IR	3	3	-	ONT.17674.2	-13.38	0.000419246	0.00634331	11.1111111111111|13.6363636363636|15.3846153846154	0|0|0	Chr5_4041346_4042037_R_ONT.17674.2_1
Chr5:4041111-4041709	AT5G12440	Chr5:4041346-4041473	IR	3	3	-	Ex.ONT.17674.1	-13.38	0.000419246	0.00634331	11.1111111111111|13.6363636363636|15.3846153846154	0|0|0	Chr5_4041346_4041473_R_Ex.ONT.17674.1_1
Chr1:18402506-18403126	AT1G49730	Chr1:18402893-18403012	IR	3	3	-	AT1G49730.1	-13.38	0.00201717	0.00214707	16.4556962025316|13.6986301369863|10	0|0|0	Chr1_18402893_18403012_R_AT1G49730.1_1
Chr5:3332382-3334971	AT5G10540	Chr5:3333090-3334906	IR (overlapping region)	3	3	-	Ex.AT5G10540.1	-13.39	0.000302973	0.00400508	12.3762376237624|12.1212121212121|15.668202764977	0|0|0	Chr5_3333090_3334906_R_Ex.AT5G10540.1_1
Chr1:3395571-3396879	AT1G10360	Chr1:3396101-3396485	IR	3	3	-	ONT.2995.2	-13.61	3.35754e-06	4.18175e-06	13.5416666666667|13|14.2857142857143	0|0|0	Chr1_3396101_3396485_R_ONT.2995.2_1
Chr3:22398737-22399903	AT3G60590	Chr3:22398767-22398885	IR	3	3	-	Ex.AT3G60590.1	-13.63	0.00517218	0.0108988	8.82352941176471|15.1515151515152|16.9230769230769	0|0|0	Chr3_22398767_22398885_R_Ex.AT3G60590.1_1
Chr3:22398732-22399887	AT3G60590	Chr3:22398782-22398885	IR	3	3	-	Ex.TSS.ONT.9910.3	-13.63	0.00517218	0.0108988	8.82352941176471|15.1515151515152|16.9230769230769	0|0|0	Chr3_22398782_22398885_R_Ex.TSS.ONT.9910.3_1
Chr4:18273973-18275017	AT4G39260	Chr4:18274570-18274855	IR	3	3	-	ONT.14900.3	-13.64	1.37112e-07	5.01409e-07	13.6669874879692|13.9190952588082|13.339552238806	0|0|0	Chr4_18274570_18274855_R_ONT.14900.3_1
Chr4:18273973-18275017	AT4G39260	Chr4:18274570-18274848	IR	3	3	-	ONT.14900.3	-13.64	1.37112e-07	5.01409e-07	13.6669874879692|13.9190952588082|13.339552238806	0|0|0	Chr4_18274570_18274848_R_ONT.14900.3_1
Chr4:18273973-18275017	AT4G39260	Chr4:18274568-18274850	IR	3	3	-	ONT.14900.3	-13.64	1.37112e-07	5.01409e-07	13.6669874879692|13.9190952588082|13.339552238806	0|0|0	Chr4_18274568_18274850_R_ONT.14900.3_1
Chr3:11193576-11194887	AT3G29250	Chr3:11194536-11194826	IR	3	3	-	ONT.11168.3	-13.66	0.00106083	0.00188796	15.5172413793103|15|10.4477611940298	0|0|0	Chr3_11194536_11194826_R_ONT.11168.3_1
Chr3:11193576-11194887	AT3G29250	Chr3:11194536-11194822	IR	3	3	-	ONT.11168.3	-13.66	0.00106083	0.00188796	15.5172413793103|15|10.4477611940298	0|0|0	Chr3_11194536_11194822_R_ONT.11168.3_1
Chr3:11193576-11194887	AT3G29250	Chr3:11194536-11194820	IR	3	3	-	ONT.11168.3	-13.66	0.00106083	0.00188796	15.5172413793103|15|10.4477611940298	0|0|0	Chr3_11194536_11194820_R_ONT.11168.3_1
Chr4:18273957-18275016	AT4G39260	Chr4:18274568-18274692	IR	3	3	-	Ex.ONT.14900.2	-13.68	9.86466e-08	3.60883e-07	13.6669874879692|13.9565217391304|13.4203168685927	0|0|0	Chr4_18274568_18274692_R_Ex.ONT.14900.2_1
Chr2:9265253-9266371	AT2G21660	Chr2:9265894-9266036	IR	3	3	-	Ex.ONT.7034.2	-13.69	1.79099e-07	3.10842e-07	13.6775994417306|13.3836858006042|14.0068493150685	0|0|0	Chr2_9265894_9266036_R_Ex.ONT.7034.2_1
Chr1:1477545-1478884	ONT.2770	Chr1:1477819-1478699	IR	3	3	-	Ex.ONT.2770.47	-13.69	0.00430974	0.00436845	9.52380952380952|13.8888888888889|17.6470588235294	0|0|0	Chr1_1477819_1478699_R_Ex.ONT.2770.47_1
Chr2:9265280-9266371	AT2G21660	Chr2:9265896-9266200	IR	3	3	-	ONT.7034.8	-13.72	1.38774e-07	2.3895e-07	13.6474694589878|13.4621189254452|14.0362889421431	0|0|0	Chr2_9265896_9266200_R_ONT.7034.8_1
Chr2:9265280-9266371	AT2G21660	Chr2:9265894-9266202	IR	3	3	-	ONT.7034.8	-13.72	1.38774e-07	2.3895e-07	13.6474694589878|13.4621189254452|14.0362889421431	0|0|0	Chr2_9265894_9266202_R_ONT.7034.8_1
Chr3:11193576-11194887	AT3G29250	Chr3:11194541-11194831	IR	3	3	-	ONT.11168.3	-13.74	0.00113047	0.00201181	15.5172413793103|15.2542372881356|10.4477611940298	0|0|0	Chr3_11194541_11194831_R_ONT.11168.3_1
Chr2:12617936-12618467	AT2G29420	Chr2:12618080-12618300	IR	3	3	-	AT2G29420.1	-13.74	0.000391122	0.000560081	13.4078212290503|16.0621761658031|11.7647058823529	0|0|0	Chr2_12618080_12618300_R_AT2G29420.1_1
Chr1:24951237-24953677	AT1G66880	Chr1:24952059-24952951	IR	3	3	-	Ex.ONT.2011.4	-13.74	0.00410316	0.00471461	16|9.09090909090909|16.1290322580645	0|0|0	Chr1_24952059_24952951_R_Ex.ONT.2011.4_1
Chr1:12550957-12552629	AT1G34370	Chr1:12551268-12551361	IR	3	3	-	AT1G34370.1	-13.77	2.38085e-05	2.47161e-05	14.4404332129964|12.5391849529781|14.3333333333333	0|0|0	Chr1_12551268_12551361_R_AT1G34370.1_1
Chr1:22767674-22768502	AT1G61667	Chr1:22768089-22768213	IR (overlapping region)	3	3	-	ONT.1820.2	-13.83	0.0068089	0.00760853	12.8205128205128|9.75609756097561|18.9189189189189	0|0|0	Chr1_22768089_22768213_R_ONT.1820.2_1
Chr2:9265280-9266371	AT2G21660	Chr2:9265885-9266200	IR	3	3	-	ONT.7034.8	-13.93	3.65893e-07	6.29905e-07	13.8396025550035|13.597298956415|14.3408134642356	0|0|0	Chr2_9265885_9266200_R_ONT.7034.8_1
Chr5:8264569-8265741	AT5G24290	Chr5:8265232-8265389	IR	3	3	-	Ex.AT5G24290.1	-13.97	0.00886209	0.502423	18.1818181818182|8.33333333333333|15.3846153846154	0|0|0	Chr5_8265232_8265389_R_Ex.AT5G24290.1_1
Chr5:8264569-8265655	AT5G24290	Chr5:8265184-8265389	IR	3	3	-	Ex.AT5G24290.2	-13.97	0.00886209	0.502423	18.1818181818182|8.33333333333333|15.3846153846154	0|0|0	Chr5_8265184_8265389_R_Ex.AT5G24290.2_1
Chr4:18273973-18275017	AT4G39260	Chr4:18274559-18274848	IR	3	3	-	ONT.14900.3	-14	8.9768e-08	3.28465e-07	13.9079333986288|14.2984807864164|13.7848222862632	0|0|0	Chr4_18274559_18274848_R_ONT.14900.3_1
Chr4:18273973-18275017	AT4G39260	Chr4:18274556-18274848	IR	3	3	-	ONT.14900.3	-14	8.9768e-08	3.28465e-07	13.9079333986288|14.2984807864164|13.7848222862632	0|0|0	Chr4_18274556_18274848_R_ONT.14900.3_1
Chr5:9605650-9607679	AT5G27270	Chr5:9606193-9606277	IR (overlapping region)	3	3	-	Ex.AT5G27270.1	-14.06	7.49161e-05	0.0208332	12.5|14.2857142857143|15.3846153846154	0|0|0	Chr5_9606193_9606277_R_Ex.AT5G27270.1_1
Chr5:2330399-2332281	AT5G07370	Chr5:2330498-2331232	IR	3	3	-	AT5G07370.4	-14.14	0.000361492	0.00278337	11.6161616161616|15.3526970954357|15.450643776824	0|0|0	Chr5_2330498_2331232_R_AT5G07370.4_1
Chr5:2330399-2332281	AT5G07370	Chr5:2330498-2331226	IR	3	3	-	AT5G07370.4	-14.14	0.000361492	0.00278337	11.6161616161616|15.3526970954357|15.450643776824	0|0|0	Chr5_2330498_2331226_R_AT5G07370.4_1
Chr3:18935815-18936619	AT3G50950	Chr3:18935888-18936115	IR	3	3	-	ONT.9531.3	-14.15	0.00315408	0.00596645	9.6969696969697|16.5|16.2650602409639	0|0|0	Chr3_18935888_18936115_R_ONT.9531.3_1
Chr3:18935815-18936619	AT3G50950	Chr3:18935888-18936109	IR	3	3	-	ONT.9531.3	-14.15	0.00315408	0.00596645	9.6969696969697|16.5|16.2650602409639	0|0|0	Chr3_18935888_18936109_R_ONT.9531.3_1
Chr1:12550957-12552629	AT1G34370	Chr1:12551420-12551535	IR	3	3	-	AT1G34370.1	-14.15	3.00512e-05	3.11959e-05	14.7482014388489|12.8125|14.9006622516556	0|0|0	Chr1_12551420_12551535_R_AT1G34370.1_1
Chr2:19349425-19350562	AT2G47130	Chr2:19350387-19350467	IR	3	3	-	ONT.8067.2	-14.17	0.00862068	0.0138654	9.61538461538462|19.6969696969697|13.2075471698113	0|0|0	Chr2_19350387_19350467_R_ONT.8067.2_1
Chr2:19349425-19350562	AT2G47130	Chr2:19350387-19350463	IR	3	3	-	ONT.8067.2	-14.17	0.00862068	0.013913	9.61538461538462|19.6969696969697|13.2075471698113	0|0|0	Chr2_19350387_19350463_R_ONT.8067.2_1
Chr1:29993208-29993914	ONT.2544	Chr1:29993405-29993485	IR (overlapping region)	3	3	-	ONT.2544.1	-14.29	0.00138245	0.00169504	10.6918238993711|15.7894736842105|16.3841807909604	0|0|0	Chr1_29993405_29993485_R_ONT.2544.1_1
Chr1:6529777-6532614	AT1G18900	Chr1:6532337-6532439	IR	3	3	-	AT1G18900.1	-14.31	0.000760606	0.000999536	17.3913043478261|13.0434782608696|12.5	0|0|0	Chr1_6532337_6532439_R_AT1G18900.1_1
Chr3:4182995-4183975	AT3G13060	Chr3:4183208-4183293	IR (overlapping region)	3	3	-	AT3G13060.1	-14.43	0.00660917	0.015229	11.4864864864865|20|11.8055555555556	0|0|0	Chr3_4183208_4183293_R_AT3G13060.1_1
Chr1:6184904-6185604	AT1G17970	Chr1:6185325-6185482	IR (overlapping region)	3	3	-	AT1G17970.1	-14.44	0.00667184	0.0087079	20|12.2222222222222|11.1111111111111	0|0|0	Chr1_6185325_6185482_R_AT1G17970.1_1
Chr1:1477507-1478874	ONT.2770	Chr1:1477816-1478699	IR	3	3	-	Ex.ONT.2770.27	-14.46	0.00445968	0.00452031	9.52380952380952|16.2162162162162|17.6470588235294	0|0|0	Chr1_1477816_1478699_R_Ex.ONT.2770.27_1
Chr2:18461957-18463271	AT2G44790	Chr2:18462619-18463060	IR (overlapping region)	3	3	-	ONT.7975.2	-14.6	0.000859991	0.00136119	15.9090909090909|11.3636363636364|16.5413533834586	0|0|0	Chr2_18462619_18463060_R_ONT.7975.2_1
Chr5:2330399-2332281	AT5G07370	Chr5:2331044-2331226	IR	3	3	-	AT5G07370.4	-14.68	0.000222067	0.00171054	12.3655913978495|15.8798283261803|15.7894736842105	0|0|0	Chr5_2331044_2331226_R_AT5G07370.4_1
Chr5:2330399-2332281	AT5G07370	Chr5:2330845-2331226	IR	3	3	-	AT5G07370.4	-14.68	0.000222067	0.00171054	12.3655913978495|15.8798283261803|15.7894736842105	0|0|0	Chr5_2330845_2331226_R_AT5G07370.4_1
Chr1:4575408-4576632	AT1G13350	Chr1:4575836-4576238	IR	3	3	-	Ex.AT1G13350.1	-14.7	0.00019239	0.000243924	12.5|15.4761904761905|16.1290322580645	0|0|0	Chr1_4575836_4576238_R_Ex.AT1G13350.1_1
Chr2:12905556-12906167	ONT.5897	Chr2:12905827-12905953	IR (overlapping region)	3	3	-	ONT.5897.1	-14.72	0.00132509	0.00190553	18.4|13.013698630137|12.751677852349	0|0|0	Chr2_12905827_12905953_R_ONT.5897.1_1
Chr1:13838548-13839083	ONT.3886	Chr1:13838776-13839001	IR	3	3	-	ONT.3886.2	-14.72	0.000413849	0.000431719	13.4615384615385|17.4418604651163|13.265306122449	0|0|0	Chr1_13838776_13839001_R_ONT.3886.2_1
Chr3:4377097-4378414	AT3G13440	Chr3:4378075-4378333	IR (overlapping region)	3	3	-	Ex.AT3G13440.1	-14.74	0.00572728	0.0132611	9.85915492957746|19.3181818181818|15.0537634408602	0|0|0	Chr3_4378075_4378333_R_Ex.AT3G13440.1_1
Chr2:12905556-12906167	ONT.5897	Chr2:12906043-12906155	IR (overlapping region)	3	3	-	ONT.5897.1	-14.76	0.00159228	0.00228967	18.5483870967742|13.5714285714286|12.1621621621622	0|0|0	Chr2_12906043_12906155_R_ONT.5897.1_1
Chr3:2393691-2394675	AT3G07510	Chr3:2394487-2394573	IR	3	3	-	Ex.AT3G07510.1	-14.79	0.000209662	0.000455061	17.0731707317073|13.8888888888889|13.4146341463415	0|0|0	Chr3_2394487_2394573_R_Ex.AT3G07510.1_1
Chr3:2393691-2394616	AT3G07510	Chr3:2394487-2394567	IR	3	3	-	Ex.ONT.10324.1	-14.79	0.000209662	0.000455061	17.0731707317073|13.8888888888889|13.4146341463415	0|0|0	Chr3_2394487_2394567_R_Ex.ONT.10324.1_1
Chr3:21889696-21889909	AT3G59210	Chr3:21889789-21889909	TSS|A3SS	3	3	-	TSS.AT3G59210.3	-14.81	0.00129309	0.00268118	20.5128205128205|21.7391304347826|19.6078431372549	8.69565217391304|6.02409638554217|2.7027027027027	Chr3_21889696_21889909_S_TSS.AT3G59210.3_1
Chr2:1646032-1646154	AT2G04690	Chr2:1646032-1646066	TSS|A5SS	3	3	-	TSS.AT2G04690.2	-14.81	0.000908597	0.00138402	49.4413407821229|46.0916442048518|50.259067357513	32.312925170068|33.1288343558282|35.9154929577465	Chr2_1646032_1646154_S_TSS.AT2G04690.2_1
Chr1:24950097-24953677	AT1G66880	Chr1:24950847-24952951	IR	3	3	-	Ex.ONT.2011.1	-14.82	0.00782022	0.00898531	19.2307692307692|9.09090909090909|16.1290322580645	0|0|0	Chr1_24950847_24952951_R_Ex.ONT.2011.1_1
Chr4:18273957-18274567	AT4G39260	Chr4:18274279-18274470	IR	3	3	-	ONT.14900.2	-14.88	1.58616e-07	5.79995e-07	14.7743467933492|15.2462526766595|14.6139705882353	0|0|0	Chr4_18274279_18274470_R_ONT.14900.2_1
Chr5:20106653-20107191	AT5G49550	Chr5:20107002-20107072	IR	3	3	-	Ex.AT5G49550.1	-14.89	0.00207865	0.0127483	14.2011834319527|18.8235294117647|11.6564417177914	0|0|0	Chr5_20107002_20107072_R_Ex.AT5G49550.1_1
Chr2:9265280-9266371	AT2G21660	Chr2:9265491-9266202	IR	3	3	-	ONT.7034.8	-14.92	1.40336e-07	2.41628e-07	14.9264190609671|14.5934466019417|15.2324774462179	0|0|0	Chr2_9265491_9266202_R_ONT.7034.8_1
Chr2:9265280-9266371	AT2G21660	Chr2:9265485-9266202	IR	3	3	-	ONT.7034.8	-14.93	1.67349e-07	2.90463e-07	14.9264190609671|14.5934466019417|15.2618799861256	0|0|0	Chr2_9265485_9266202_R_ONT.7034.8_1
Chr1:19293478-19293969	AT1G51915	Chr1:19293690-19293764	IR	3	3	-	Ex.AT1G51915.1	-14.95	0.00400677	0.00430146	10|18.1818181818182|16.6666666666667	0|0|0	Chr1_19293690_19293764_R_Ex.AT1G51915.1_1
Chr4:14715431-14716137	AT4G30100	Chr4:14715555-14715612	SES	3	3	-	ONT.13024.2	-15	0.0085975	0.0266994	34.453781512605|29.1139240506329|35.3535353535354	22.7941176470588|16.1904761904762|14.9350649350649	Chr4_14715431_14716137_W_ONT.13024.2_1
Chr5:20106631-20107210	AT5G49550	Chr5:20106983-20107072	IR	3	3	-	Ex.ONT.18763.3	-15.07	0.00154532	0.0094789	14.2011834319527|18.8235294117647|12.1951219512195	0|0|0	Chr5_20106983_20107072_R_Ex.ONT.18763.3_1
Chr4:16799168-16799455	AT4G35300	Chr4:16799425-16799455	TSS|A5SS	3	3	-	TSS.AT4G35300.2	-15.07	0.00936258	0.0321434	37.037037037037|39.5833333333333|30	20.2702702702703|18.0722891566265|23.0769230769231	Chr4_16799168_16799455_S_TSS.AT4G35300.2_1
Chr5:23493211-23494172	AT5G58040	Chr5:23493706-23493943	IR	3	3	-	ONT.16836.5	-15.19	0.00431196	0.033691	18.1818181818182|10|17.3913043478261	0|0|0	Chr5_23493706_23493943_R_ONT.16836.5_1
Chr3:18733068-18734388	AT3G50480	Chr3:18733598-18733888	IR	3	3	-	Ex.AT3G50480.1	-15.3	0.000104022	0.000196306	14.6258503401361|14.0115163147793|17.2527472527473	0|0|0	Chr3_18733598_18733888_R_Ex.AT3G50480.1_1
Chr1:7554976-7555182	AT1G21560	Chr1:7554976-7555007	A5SS	3	3	-	Ex.ONT.852.4	-15.32	0.00266622	0.00352639	36.8421052631579|42.8571428571429|42.2222222222222	26.5625|26.6666666666667|22.7272727272727	Chr1_7554976_7555182_S_Ex.ONT.852.4_1
Chr1:21214139-21215404	ONT.4258	Chr1:21214608-21214719	IR	3	3	-	ONT.4258.1	-15.36	0.00432361	0.00477024	11.4285714285714|20.3703703703704|14.2857142857143	0|0|0	Chr1_21214608_21214719_R_ONT.4258.1_1
Chr5:6470171-6471062	AT5G19240	Chr5:6470291-6470463	IR	3	3	-	ONT.15671.2	-15.4	0.0045835	0.119033	18.9473684210526|10.1321585903084|17.1171171171171	0|0|0	Chr5_6470291_6470463_R_ONT.15671.2_1
Chr3:14917378-14918477	ONT.9295	Chr3:14917783-14917853	MES	3	3	-	ONT.9295.10	-15.44	0.00875226	0.0158233	77.5700934579439|80.6306306306306|83.756345177665	62.3809523809524|70.5882352941177|62.6760563380282	Chr3_14917378_14918477_W_ONT.9295.10_1
Chr2:19319783-19320992	ONT.6572	Chr2:19320459-19320541	IR (overlapping region)	3	3	-	ONT.6572.1	-15.44	3.82504e-06	6.16701e-06	16.2162162162162|14.7058823529412|15.3846153846154	0|0|0	Chr2_19320459_19320541_R_ONT.6572.1_1
Chr2:19319783-19320992	ONT.6572	Chr2:19320454-19320541	IR (overlapping region)	3	3	-	ONT.6572.1	-15.44	3.82504e-06	6.16701e-06	16.2162162162162|14.7058823529412|15.3846153846154	0|0|0	Chr2_19320454_19320541_R_ONT.6572.1_1
Chr2:8850238-8850886	AT2G20562	Chr2:8850491-8850737	IR	3	3	-	ONT.6986.2	-15.46	0.00600661	0.0102729	17.1428571428571|9.80392156862745|19.4444444444444	0|0|0	Chr2_8850491_8850737_R_ONT.6986.2_1
Chr5:3333459-3335232	AT5G10550	Chr5:3334920-3335013	IR (overlapping region)	3	3	-	Ex.AT5G10550.1	-15.54	1.65526e-05	0.000218965	14.7465437788018|15.0735294117647|16.793893129771	0|0|0	Chr5_3334920_3335013_R_Ex.AT5G10550.1_1
Chr3:19273494-19275269	AT3G51940	Chr3:19274982-19275069	IR	3	3	-	Ex.AT3G51940.1	-15.6	0.000738777	0.00141203	18.75|15|13.0434782608696	0|0|0	Chr3_19274982_19275069_R_Ex.AT3G51940.1_1
Chr2:11696800-11697647	AT2G27340	Chr2:11696937-11697554	SES	3	3	-	AT2G27340.2	-15.72	9.56764e-05	0.000135621	49.0566037735849|46.5116279069767|47.6190476190476	31.5789473684211|33.3333333333333|31.1111111111111	Chr2_11696800_11697647_W_AT2G27340.2_1
Chr2:9223762-9224336	AT2G21540	Chr2:9224154-9224336	TSS|A5SS	3	3	-	TSS.AT2G21540.3	-15.92	0.00254019	0.00440573	85.7142857142857|90.4761904761905|90.2912621359223	75.3623188405797|73.9130434782609|69.4444444444444	Chr2_9223762_9224336_S_TSS.AT2G21540.3_1
Chr1:1477528-1478874	ONT.2770	Chr1:1477777-1478810	IR	3	3	-	Ex.ONT.2770.41	-15.94	0.00169035	0.00171369	12.8205128205128|20|15	0|0|0	Chr1_1477777_1478810_R_Ex.ONT.2770.41_1
Chr2:11696800-11697647	AT2G27340	Chr2:11696937-11697558	SES	3	3	-	ONT.5789.2	-16.1	0.00369929	0.00524412	98.1132075471698|95.3488372093023|93.6507936507936	81.5789473684211|75|82.2222222222222	Chr2_11696800_11697647_W_ONT.5789.2_1
Chr4:9490995-9495816	AT4G16860	Chr4:9492073-9495230	IR	3	3	-	Ex.AT4G16860.1	-16.14	0.0093925	0.0412919	21.9101123595506|16.5137614678899|10	0|0|0	Chr4_9492073_9495230_R_Ex.AT4G16860.1_1
Chr2:16476556-16476643	AT2G39470	Chr2:16476556-16476558	A5SS	3	3	-	Ex.AT2G39470.1	-16.2	0.00986528	0.0150381	73.7642585551331|78.0405405405405|73.4939759036145	64.1025641025641|59.4594594594595|53.125	Chr2_16476556_16476643_S_Ex.AT2G39470.1_1
Chr2:16476535-16476643	AT2G39470	Chr2:16476535-16476558	A5SS	3	3	-	AT2G39470.1	-16.2	0.00986528	0.0150381	73.7642585551331|78.0405405405405|73.4939759036145	64.1025641025641|59.4594594594595|53.125	Chr2_16476535_16476643_S_AT2G39470.1_1
Chr1:12051739-12052559	ONT.1241	Chr1:12052117-12052198	IR (overlapping region)	3	3	-	ONT.1241.1	-16.33	0.00179175	0.00185349	14.5833333333333|20.7207207207207|13.6842105263158	0|0|0	Chr1_12052117_12052198_R_ONT.1241.1_1
Chr1:12051739-12052559	ONT.1241	Chr1:12052113-12052198	IR (overlapping region)	3	3	-	ONT.1241.1	-16.33	0.00179175	0.00185349	14.5833333333333|20.7207207207207|13.6842105263158	0|0|0	Chr1_12052113_12052198_R_ONT.1241.1_1
Chr3:7518924-7519477	AT3G21351	Chr3:7519090-7519187	IR	3	3	-	Ex.AT3G21351.1	-16.48	0.00450156	0.0113818	21.1764705882353|16.9491525423729|11.304347826087	0|0|0	Chr3_7519090_7519187_R_Ex.AT3G21351.1_1
Chr4:522627-524206	AT4G01250	Chr4:523588-523797	IR	3	3	-	ONT.13513.1	-16.5	0.00157978	0.00609113	13.6904761904762|20.7446808510638|15.0537634408602	0|0|0	Chr4_523588_523797_R_ONT.13513.1_1
Chr5:22203909-22205177	AT5G54660	Chr5:22204266-22204723	IR	3	3	-	ONT.16697.2	-16.58	0.00542753	0.0389046	20.8333333333333|10.7142857142857|18.1818181818182	0|0|0	Chr5_22204266_22204723_R_ONT.16697.2_1
Chr4:10151124-10152109	AT4G18372	Chr4:10151709-10152069	IR	3	3	-	ONT.14041.2	-16.61	0.003461	0.00929946	18|20.4081632653061|11.4285714285714	0|0|0	Chr4_10151709_10152069_R_ONT.14041.2_1
Chr4:10151050-10152115	AT4G18372	Chr4:10151712-10152074	IR	3	3	-	Ex.ONT.14041.1	-16.61	0.003461	0.00929946	18|20.4081632653061|11.4285714285714	0|0|0	Chr4_10151712_10152074_R_Ex.ONT.14041.1_1
Chr2:19310893-19311544	ONT.6570	Chr2:19311098-19311182	IR (overlapping region)	3	3	-	ONT.6570.1	-16.62	0.00398526	0.00641068	16.6666666666667|21.4285714285714|11.7647058823529	0|0|0	Chr2_19311098_19311182_R_ONT.6570.1_1
Chr2:15165437-15166465	AT2G36120	Chr2:15165784-15166158	IR	3	3	-	AT2G36120.1	-16.65	5.33047e-08	7.94151e-08	16.3636363636364|16.6666666666667|16.9230769230769	0|0|0	Chr2_15165784_15166158_R_AT2G36120.1_1
Chr4:7594776-7595988	AT4G12990	Chr4:7594840-7595823	IR	3	3	-	Ex.ONT.13804.3	-16.78	0.000197733	0.000808809	15.0943396226415|19.2982456140351|15.9420289855072	0|0|0	Chr4_7594840_7595823_R_Ex.ONT.13804.3_1
Chr1:2819068-2820020	AT1G08810	Chr1:2819859-2819969	IR (overlapping region)	3	3	-	AT1G08810.2	-16.84	0.000148355	0.000177174	17.1428571428571|18.75|14.6341463414634	0|0|0	Chr1_2819859_2819969_R_AT1G08810.2_1
Chr3:17577350-17579604	AT3G47680	Chr3:17578779-17579312	IR (overlapping region)	3	3	-	ONT.11344.10	-16.88	0.00082845	0.00153715	13.2352941176471|18|19.4029850746269	0|0|0	Chr3_17578779_17579312_R_ONT.11344.10_1
Chr1:1477507-1478882	ONT.2770	Chr1:1477757-1478768	IR	3	3	-	Ex.ONT.2770.38	-16.88	6.97198e-05	7.07147e-05	15.0943396226415|17.0212765957447|18.5185185185185	0|0|0	Chr1_1477757_1478768_R_Ex.ONT.2770.38_1
Chr1:1477507-1478879	ONT.2770	Chr1:1477756-1478766	IR	3	3	-	Ex.ONT.2770.34	-16.88	6.97198e-05	7.07147e-05	15.0943396226415|17.0212765957447|18.5185185185185	0|0|0	Chr1_1477756_1478766_R_Ex.ONT.2770.34_1
Chr1:1477461-1478879	ONT.2770	Chr1:1477756-1478768	IR	3	3	-	Ex.ONT.2770.6	-16.88	6.97198e-05	7.07147e-05	15.0943396226415|17.0212765957447|18.5185185185185	0|0|0	Chr1_1477756_1478768_R_Ex.ONT.2770.6_1
Chr1:13078138-13080265	AT1G35515	Chr1:13078268-13079889	IR	3	3	-	Ex.AT1G35515.1	-16.9	0.00305764	0.00318444	12|17.6470588235294|21.0526315789474	0|0|0	Chr1_13078268_13079889_R_Ex.AT1G35515.1_1
Chr5:26615355-26616990	AT5G66675	Chr5:26616575-26616707	IR	3	3	-	AT5G66675.1	-16.95	0.00133024	0.0147754	18.3098591549296|12.7906976744186|19.7530864197531	0|0|0	Chr5_26616575_26616707_R_AT5G66675.1_1
Chr2:7345777-7346570	AT2G16940	Chr2:7346108-7346177	MES	3	3	-	AT2G16940.2	-17.06	0.00419513	0.00702779	28.75|32.4324324324324|24.7524752475248	11.2244897959184|8.53658536585366|15	Chr2_7345777_7346570_W_AT2G16940.2_2
Chr2:7345777-7346570	AT2G16940	Chr2:7345946-7345985	MES	3	3	-	AT2G16940.2	-17.06	0.00419513	0.00702687	28.75|32.4324324324324|24.7524752475248	11.2244897959184|8.53658536585366|15	Chr2_7345777_7346570_W_AT2G16940.2_1
Chr5:1639454-1640606	AT5G05550	Chr5:1639552-1639823	IR	3	3	-	Ex.AT5G05550.2	-17.13	0.0013471	0.00693913	18|20.3389830508475|13.0434782608696	0|0|0	Chr5_1639552_1639823_R_Ex.AT5G05550.2_1
Chr4:18276672-18279708	ONT.14901	Chr4:18278769-18278856	IR (overlapping region)	3	3	-	ONT.14901.1	-17.22	9.74209e-07	3.56194e-06	16.6666666666667|17.1428571428571|17.8571428571429	0|0|0	Chr4_18278769_18278856_R_ONT.14901.1_1
Chr1:1477507-1478874	ONT.2770	Chr1:1477792-1478703	IR	3	3	-	Ex.ONT.2770.28	-17.27	0.000979169	0.000992956	13.6363636363636|20.5128205128205|17.6470588235294	0|0|0	Chr1_1477792_1478703_R_Ex.ONT.2770.28_1
Chr1:1477507-1478873	ONT.2770	Chr1:1477796-1478703	IR	3	3	-	Ex.ONT.2770.24	-17.27	0.000979169	0.000992956	13.6363636363636|20.5128205128205|17.6470588235294	0|0|0	Chr1_1477796_1478703_R_Ex.ONT.2770.24_1
Chr5:26615355-26616990	AT5G66675	Chr5:26616687-26616812	IR	3	3	-	AT5G66675.1	-17.29	0.000650475	0.00722713	18.3098591549296|13.7931034482759|19.7530864197531	0|0|0	Chr5_26616687_26616812_R_AT5G66675.1_1
Chr2:1687340-1687817	AT2G04800	Chr2:1687617-1687788	IR	3	3	-	Ex.AT2G04800.1	-17.29	0.00164166	0.00252173	14.6341463414634|15.3846153846154|21.8390804597701	0|0|0	Chr2_1687617_1687788_R_Ex.AT2G04800.1_1
Chr5:14818454-14819191	AT5G37380	Chr5:14819063-14819105	SES	3	3	-	ONT.18337.3	-17.31	0.00248436	0.0121923	63.7254901960784|59.2592592592593|57.8947368421053	44|45.5696202531646|39.3939393939394	Chr5_14818454_14819191_W_ONT.18337.3_1
Chr1:27576480-27576900	AT1G73350	Chr1:27576480-27576519	A3SS	3	3	-	AT1G73350.3	-17.4	0.000302909	0.00035905	54|54.7169811320755|50	35.6164383561644|35.0649350649351|35.8208955223881	Chr1_27576480_27576900_S_AT1G73350.3_1
Chr5:23405370-23406352	AT5G57780	Chr5:23406012-23406238	IR	3	3	-	ONT.19049.2	-17.61	0.000615504	0.00476132	21.2121212121212|16|15.625	0|0|0	Chr5_23406012_23406238_R_ONT.19049.2_1
Chr1:1477529-1478878	ONT.2770	Chr1:1477816-1478720	IR	3	3	-	Ex.ONT.2770.42	-17.65	0.00476277	0.00482727	11.4285714285714|20.8333333333333|20.6896551724138	0|0|0	Chr1_1477816_1478720_R_Ex.ONT.2770.42_1
Chr2:10205242-10205622	AT2G23985	Chr2:10205242-10205253	TSS|A5SS	3	3	-	TSS.ONT.5665.1	-17.74	0.00677746	0.00939381	46.3768115942029|50.4065040650407|45.3781512605042	24.0506329113924|34.7107438016529|30.1724137931034	Chr2_10205242_10205622_S_TSS.ONT.5665.1_1
Chr4:18278857-18279843	AT4G39270	Chr4:18278996-18279162	IR (overlapping region)	3	3	-	Ex.ONT.13416.5	-17.76	0.000149042	0.000544621	17.6470588235294|15.625|20	0|0|0	Chr4_18278996_18279162_R_Ex.ONT.13416.5_1
Chr5:4041474-4042074	AT5G12440	Chr5:4041710-4042037	IR	3	3	-	Ex.ONT.17674.1	-17.87	8.73073e-06	0.000132256	16.6666666666667|18.75|18.1818181818182	0|0|0	Chr5_4041710_4042037_R_Ex.ONT.17674.1_1
Chr1:3621421-3622272	ONT.392	Chr1:3621817-3622002	IR (overlapping region)	3	3	-	ONT.392.1	-17.92	0.00988387	0.0123263	11.6279069767442|17.1428571428571|25	0|0|0	Chr1_3621817_3622002_R_ONT.392.1_1
Chr2:9265253-9265893	AT2G21660	Chr2:9265503-9265697	IR	3	3	-	ONT.7034.2	-17.96	4.91212e-10	8.53594e-10	17.8891470295387|18.0623035152901|17.9143510951291	0|0|0	Chr2_9265503_9265697_R_ONT.7034.2_1
Chr2:9265253-9265893	AT2G21660	Chr2:9265485-9265721	IR	3	3	-	ONT.7034.2	-17.96	4.91212e-10	8.53594e-10	17.8891470295387|18.0623035152901|17.9143510951291	0|0|0	Chr2_9265485_9265721_R_ONT.7034.2_1
Chr2:9265253-9265893	AT2G21660	Chr2:9265524-9265649	IR	3	3	-	ONT.7034.2	-18.03	1.34686e-09	2.3393e-09	18.025182239894|18.1558664002284|17.9143510951291	0|0|0	Chr2_9265524_9265649_R_ONT.7034.2_1
Chr3:22810065-22810725	AT3G61640	Chr3:22810393-22810514	IR	3	3	-	ONT.11896.2	-18.04	0.0014498	0.00309505	13.5294117647059|21.1538461538462|19.4444444444444	0|0|0	Chr3_22810393_22810514_R_ONT.11896.2_1
Chr1:1477551-1478875	ONT.2770	Chr1:1477792-1478699	IR	3	3	-	Ex.ONT.2770.48	-18.05	0.00122705	0.0012441	13.6363636363636|20.5128205128205|20	0|0|0	Chr1_1477792_1478699_R_Ex.ONT.2770.48_1
Chr1:1477479-1478879	ONT.2770	Chr1:1477790-1478699	IR	3	3	-	Ex.ONT.2770.18	-18.05	0.00122705	0.0012441	13.6363636363636|20.5128205128205|20	0|0|0	Chr1_1477790_1478699_R_Ex.ONT.2770.18_1
Chr2:9265253-9265893	AT2G21660	Chr2:9265491-9265682	IR	3	3	-	ONT.7034.2	-18.15	1.00711e-09	1.74936e-09	18.1336863004633|18.27251995439|18.0483028720627	0|0|0	Chr2_9265491_9265682_R_ONT.7034.2_1
Chr2:9265253-9265893	AT2G21660	Chr2:9265485-9265664	IR	3	3	-	ONT.7034.2	-18.16	1.62853e-09	2.82841e-09	18.1878306878307|18.27251995439|18.0215475024486	0|0|0	Chr2_9265485_9265664_R_ONT.7034.2_1
Chr2:9265253-9265893	AT2G21660	Chr2:9265486-9265680	IR	3	3	-	ONT.7034.2	-18.2	3.01781e-09	5.24009e-09	18.1607674495534|18.3656036446469|18.0750407830343	0|0|0	Chr2_9265486_9265680_R_ONT.7034.2_1
Chr1:6265303-6266816	AT1G18200	Chr1:6265885-6266438	IR	3	3	-	ONT.3317.2	-18.24	0.00164088	0.00214464	13.8888888888889|18.6046511627907|22.2222222222222	0|0|0	Chr1_6265885_6266438_R_ONT.3317.2_1
Chr2:9265253-9265893	AT2G21660	Chr2:9265485-9265679	IR	3	3	-	ONT.7034.2	-18.25	8.32339e-10	1.44605e-09	18.2148760330579|18.3656036446469|18.155149934811	0|0|0	Chr2_9265485_9265679_R_ONT.7034.2_1
Chr1:19945959-19946982	AT1G53440	Chr1:19946059-19946804	IR	3	3	-	Ex.AT1G53440.1	-18.28	6.13159e-06	6.6285e-06	19.4029850746269|17.9640718562874|17.4603174603175	0|0|0	Chr1_19946059_19946804_R_Ex.AT1G53440.1_1
Chr1:20058699-20059411	ONT.4154	Chr1:20058914-20059002	IR (overlapping region)	3	3	-	ONT.4154.1	-18.32	0.00330961	0.00358484	16.6666666666667|14.2857142857143|24	0|0|0	Chr1_20058914_20059002_R_ONT.4154.1_1
Chr4:18276672-18279708	ONT.14901	Chr4:18279089-18279162	IR (overlapping region)	3	3	-	ONT.14901.1	-18.33	0.000177293	0.000647602	19.3548387096774|15.625|20	0|0|0	Chr4_18279089_18279162_R_ONT.14901.1_1
Chr4:18276672-18279708	ONT.14901	Chr4:18278990-18279162	IR (overlapping region)	3	3	-	ONT.14901.1	-18.33	0.000177293	0.000647602	19.3548387096774|15.625|20	0|0|0	Chr4_18278990_18279162_R_ONT.14901.1_1
Chr2:235932-237131	AT2G01520	Chr2:236168-236600	IR	3	3	-	Ex.ONT.5150.2	-18.35	0.00517091	0.00841239	21.0526315789474|22.2222222222222|11.7647058823529	0|0|0	Chr2_236168_236600_R_Ex.ONT.5150.2_1
Chr3:21406496-21407525	AT3G57790	Chr3:21407217-21407458	IR	3	3	-	ONT.11763.1	-18.43	1.88239e-06	3.86107e-06	19.2982456140351|18.0327868852459|17.9487179487179	0|0|0	Chr3_21407217_21407458_R_ONT.11763.1_1
Chr4:7536989-7538279	AT4G12850	Chr4:7537204-7538081	IR	3	3	-	Ex.ONT.12340.2	-18.49	7.54546e-05	0.000308673	20.6896551724138|17.6470588235294|17.1428571428571	0|0|0	Chr4_7537204_7538081_R_Ex.ONT.12340.2_1
Chr1:24244537-24244800	AT1G65270	Chr1:24244795-24244800	TSS|A3SS	3	3	-	TSS.AT1G65270.1	-18.63	0.00432587	0.00492622	73.953488372093|75.1152073732719|71.6216216216216	60.7142857142857|53.6036036036036|50.4761904761905	Chr1_24244537_24244800_S_TSS.AT1G65270.1_1
Chr2:18701144-18701536	AT2G45380	Chr2:18701144-18701145	A3SS	3	3	-	Ex.AT2G45380.1	-18.81	0.00252441	0.00402186	62.1145374449339|59.1269841269841|55.2727272727273	40.8866995073892|42.9245283018868|36.2790697674419	Chr2_18701144_18701536_S_Ex.AT2G45380.1_1
Chr1:22409647-22410498	AT1G60870	Chr1:22409915-22409986	IR (overlapping region)	3	3	-	ONT.1797.3	-18.96	0.000184621	0.000205736	17.1111111111111|17.9959100204499|21.7592592592593	0|0|0	Chr1_22409915_22409986_R_ONT.1797.3_1
Chr2:8695980-8697089	AT2G20142	Chr2:8696529-8696934	IR	3	3	-	ONT.5516.2	-19.07	9.08183e-05	0.000155122	21.2121212121212|17.0731707317073|18.9189189189189	0|0|0	Chr2_8696529_8696934_R_ONT.5516.2_1
Chr1:6712053-6714244	AT1G19400	Chr1:6712438-6712535	IR	3	3	-	ONT.3362.3	-19.11	0.000464786	0.000613117	15.8620689655172|22.1556886227545|19.3103448275862	0|0|0	Chr1_6712438_6712535_R_ONT.3362.3_1
Chr2:8125595-8125801	AT2G18750	Chr2:8125595-8125710	A5SS	3	3	-	Ex.TSS.AT2G18750.1	-19.17	0.00694107	0.0117712	27.2727272727273|32.3529411764706|38.7096774193548	14.2857142857143|16.2790697674419|10.2564102564103	Chr2_8125595_8125801_S_Ex.TSS.AT2G18750.1_1
Chr4:7595002-7595992	AT4G12990	Chr4:7595430-7595823	IR	3	3	-	ONT.13804.7	-19.44	1.14375e-05	4.67991e-05	18.1818181818182|20.6896551724138|19.4444444444444	0|0|0	Chr4_7595430_7595823_R_ONT.13804.7_1
Chr1:1477507-1478873	ONT.2770	Chr1:1477777-1478720	IR	3	3	-	Ex.ONT.2770.23	-19.45	0.000204075	0.000206982	17.0731707317073|22.2222222222222|19.047619047619	0|0|0	Chr1_1477777_1478720_R_Ex.ONT.2770.23_1
Chr3:20296232-20297184	AT3G54810	Chr3:20296400-20296928	IR	3	3	-	Ex.AT3G54810.2	-19.6	0.0010963	0.00215749	18.0645161290323|24.1830065359477|16.5562913907285	0|0|0	Chr3_20296400_20296928_R_Ex.AT3G54810.2_1
Chr5:8468338-8469262	ONT.18152	Chr5:8468673-8469107	IR	3	3	-	Ex.ONT.18152.4	-19.61	9.30266e-05	0.0068818	21.9367588932806|19.1756272401434|17.7121771217712	0|0|0	Chr5_8468673_8469107_R_Ex.ONT.18152.4_1
Chr5:8468336-8469242	ONT.18152	Chr5:8468673-8469014	IR	3	3	-	Ex.ONT.18152.3	-19.61	9.30266e-05	0.0068818	21.9367588932806|19.1756272401434|17.7121771217712	0|0|0	Chr5_8468673_8469014_R_Ex.ONT.18152.3_1
Chr3:5052731-5054942	AT3G15010	Chr3:5054063-5054605	IR	3	3	-	AT3G15010.2	-19.66	0.00707858	0.0166695	23.3644859813084|11.9205298013245|23.6842105263158	0|0|0	Chr3_5054063_5054605_R_AT3G15010.2_1
Chr3:462787-463031	AT3G02300	Chr3:462787-462954	A5SS	3	3	-	ONT.8160.3	-19.72	0.00638532	0.0149363	42.2222222222222|32.6086956521739|33.3333333333333	18.0722891566265|12.037037037037|18.8888888888889	Chr3_462787_463031_S_ONT.8160.3_1
Chr3:17197631-17199244	AT3G46690	Chr3:17198638-17198716	IR	3	3	-	ONT.11304.2	-19.93	0.00074182	0.00136875	20.253164556962|23.469387755102|16.0714285714286	0|0|0	Chr3_17198638_17198716_R_ONT.11304.2_1
Chr2:15165437-15166465	AT2G36120	Chr2:15165799-15166152	IR	3	3	-	AT2G36120.1	-20	0.000759362	0.00112859	16.0714285714286|20.4081632653061|23.5294117647059	0|0|0	Chr2_15165799_15166152_R_AT2G36120.1_1
Chr3:21715192-21715549	AT3G58710	Chr3:21715317-21715405	IR (overlapping region)	3	3	-	Ex.AT3G58710.2	-20.01	0.000798513	0.00165579	19.2307692307692|24.1379310344828|16.6666666666667	0|0|0	Chr3_21715317_21715405_R_Ex.AT3G58710.2_1
Chr3:21715052-21715549	AT3G58710	Chr3:21715321-21715405	IR (overlapping region)	3	3	-	Ex.ONT.9843.2	-20.01	0.000798513	0.00165579	19.2307692307692|24.1379310344828|16.6666666666667	0|0|0	Chr3_21715321_21715405_R_Ex.ONT.9843.2_1
Chr3:21715007-21715549	AT3G58710	Chr3:21715317-21715402	IR (overlapping region)	3	3	-	Ex.AT3G58710.1	-20.01	0.000798513	0.00165579	19.2307692307692|24.1379310344828|16.6666666666667	0|0|0	Chr3_21715317_21715402_R_Ex.AT3G58710.1_1
Chr4:7594986-7595992	AT4G12990	Chr4:7595536-7595823	IR	3	3	-	Ex.ONT.13804.6	-20.29	4.0814e-07	1.67035e-06	19.6428571428571|20.6896551724138|20.5479452054795	0|0|0	Chr4_7595536_7595823_R_Ex.ONT.13804.6_1
Chr3:16296154-16296399	AT3G44740	Chr3:16296154-16296330	TSS|A3SS	3	3	-	TSS.AT3G44740.1	-20.37	0.00880171	0.0160536	89.7435897435898|96.4912280701754|86.4406779661017	76.6666666666667|67.5|67.3913043478261	Chr3_16296154_16296399_S_TSS.AT3G44740.1_1
Chr5:22327240-22329187	AT5G55040	Chr5:22327459-22327537	IR	3	3	-	AT5G55040.1	-20.46	0.000579484	0.00418604	17.1428571428571|24.2424242424242|20	0|0|0	Chr5_22327459_22327537_R_AT5G55040.1_1
Chr4:18276672-18279708	ONT.14901	Chr4:18278990-18279150	IR (overlapping region)	3	3	-	ONT.14901.1	-20.48	1.74869e-06	6.39179e-06	21.4285714285714|20|20	0|0|0	Chr4_18278990_18279150_R_ONT.14901.1_1
Chr4:18276672-18279708	ONT.14901	Chr4:18278990-18279146	IR (overlapping region)	3	3	-	ONT.14901.1	-20.48	1.74869e-06	6.39179e-06	21.4285714285714|20|20	0|0|0	Chr4_18278990_18279146_R_ONT.14901.1_1
Chr4:18276672-18279708	ONT.14901	Chr4:18278986-18279065	IR (overlapping region)	3	3	-	ONT.14901.1	-20.48	1.74869e-06	6.39179e-06	21.4285714285714|20|20	0|0|0	Chr4_18278986_18279065_R_ONT.14901.1_1
Chr3:17200319-17201889	AT3G46700	Chr3:17201308-17201382	IR	3	3	-	ONT.11305.2	-20.48	0.00319871	0.00588547	17.8571428571429|26.9230769230769|16.6666666666667	0|0|0	Chr3_17201308_17201382_R_ONT.11305.2_1
Chr2:15165437-15166465	AT2G36120	Chr2:15165757-15166152	IR	3	3	-	AT2G36120.1	-20.98	0.000641665	0.000953809	17.5438596491228|20.4081632653061|25	0|0|0	Chr2_15165757_15166152_R_AT2G36120.1_1
Chr5:17961201-17962202	AT5G44568	Chr5:17961501-17962040	IR	3	3	-	Ex.AT5G44568.1	-21.19	9.18947e-05	0.000506291	18.673647469459|23.2198142414861|21.6666666666667	0|0|0	Chr5_17961501_17962040_R_Ex.AT5G44568.1_1
Chr1:1477508-1478879	ONT.2770	Chr1:1477774-1478720	IR	3	3	-	Ex.ONT.2770.39	-21.33	4.99889e-05	5.07063e-05	19.047619047619|22.2222222222222|22.7272727272727	0|0|0	Chr1_1477774_1478720_R_Ex.ONT.2770.39_1
Chr1:1477507-1478879	ONT.2770	Chr1:1477777-1478687	IR	3	3	-	Ex.ONT.2770.33	-21.33	4.99889e-05	5.07063e-05	19.047619047619|22.2222222222222|22.7272727272727	0|0|0	Chr1_1477777_1478687_R_Ex.ONT.2770.33_1
Chr4:7653692-7654967	AT4G13160	Chr4:7653701-7653876	IR	3	3	-	ONT.12350.2	-21.35	4.02784e-05	0.000165519	22.6415094339623|19.1780821917808|22.2222222222222	0|0|0	Chr4_7653701_7653876_R_ONT.12350.2_1
Chr3:5718086-5718921	ONT.10719	Chr3:5718318-5718446	IR (overlapping region)	3	3	-	ONT.10719.1	-21.52	0.000414315	0.000996437	24.5614035087719|17.7777777777778|22.2222222222222	0|0|0	Chr3_5718318_5718446_R_ONT.10719.1_1
Chr1:6266439-6266816	AT1G18200	Chr1:6266663-6266778	IR (overlapping region)	3	3	-	ONT.3317.1	-21.61	0.00707746	0.00924999	16.2162162162162|18.6046511627907|30	0|0|0	Chr1_6266663_6266778_R_ONT.3317.1_1
Chr1:11453634-11455313	AT1G31885	Chr1:11453643-11453713	IR (overlapping region)	3	3	-	ONT.1197.5	-21.74	0.00174646	0.00179605	15.9090909090909|25|24.3243243243243	0|0|0	Chr1_11453643_11453713_R_ONT.1197.5_1
Chr3:5052731-5054062	AT3G15010	Chr3:5053194-5053279	IR	3	3	-	AT3G15010.1	-21.85	0.00977291	0.0230003	25.4545454545455|12.5|27.5862068965517	0|0|0	Chr3_5053194_5053279_R_AT3G15010.1_1
Chr3:5718086-5718921	ONT.10719	Chr3:5718177-5718255	IR (overlapping region)	3	3	-	ONT.10719.1	-22.24	0.000396955	0.000954746	24.5283018867925|18.1818181818182|24	0|0|0	Chr3_5718177_5718255_R_ONT.10719.1_1
Chr5:8947373-8948382	AT5G25630	Chr5:8947498-8947696	IR	3	3	-	ONT.15890.4	-22.27	4.1174e-05	0.00472484	21.3903743315508|24.5454545454545|20.8860759493671	0|0|0	Chr5_8947498_8947696_R_ONT.15890.4_1
Chr2:15165437-15166465	AT2G36120	Chr2:15165793-15166194	IR	3	3	-	AT2G36120.1	-22.6	6.47677e-05	9.63574e-05	20|23.8095238095238|24	0|0|0	Chr2_15165793_15166194_R_AT2G36120.1_1
Chr1:1477475-1478871	ONT.2770	Chr1:1477774-1478645	IR	3	3	-	Ex.ONT.2770.15	-22.98	0.000796012	0.000807263	19.047619047619|22.2222222222222|27.6595744680851	0|0|0	Chr1_1477774_1478645_R_Ex.ONT.2770.15_1
Chr1:2421218-2421943	AT1G07820	Chr1:2421784-2421902	IR	3	3	-	AT1G07820.1	-23	2.06187e-06	2.34628e-06	22.2543352601156|24.0932642487047|22.6628895184136	0|0|0	Chr1_2421784_2421902_R_AT1G07820.1_1
Chr4:10645998-10647113	AT4G19520	Chr4:10646011-10646630	IR	3	3	-	ONT.14087.2	-23.16	0.00144381	0.00392623	17.2413793103448|25.9259259259259|26.3157894736842	0|0|0	Chr4_10646011_10646630_R_ONT.14087.2_1
Chr1:20803704-20804573	AT1G55675	Chr1:20803961-20804551	IR	3	3	-	AT1G55675.1	-23.21	0.000194198	0.000212988	26.6666666666667|20.8333333333333|22.1374045801527	0|0|0	Chr1_20803961_20804551_R_AT1G55675.1_1
Chr5:3423686-3424720	AT5G10830	Chr5:3423881-3424013	IR	3	3	-	Ex.AT5G10830.1	-23.58	0.000297388	0.00393262	23.8095238095238|26.9230769230769|20	0|0|0	Chr5_3423881_3424013_R_Ex.AT5G10830.1_1
Chr5:4828642-4829049	AT5G14930	Chr5:4828774-4828925	IR	3	3	-	ONT.15498.1	-23.71	0.000507528	0.00918129	22.8915662650602|20.1754385964912|28.0487804878049	0|0|0	Chr5_4828774_4828925_R_ONT.15498.1_1
Chr1:1477479-1478882	ONT.2770	Chr1:1477795-1478655	IR	3	3	-	Ex.ONT.2770.19	-23.85	0.00110214	0.00111763	18.75|24.2424242424242|28.5714285714286	0|0|0	Chr1_1477795_1478655_R_Ex.ONT.2770.19_1
Chr3:9570326-9572003	ONT.11048	Chr3:9571061-9571145	IR	3	3	-	ONT.11048.2	-23.93	0.00779388	0.0204936	21.2121212121212|33.3333333333333|17.2413793103448	0|0|0	Chr3_9571061_9571145_R_ONT.11048.2_1
Chr3:5831253-5832419	AT3G17100	Chr3:5831384-5831465	IR	3	3	-	AT3G17100.1	-24	1.86175e-05	4.49629e-05	24.4897959183673|25.4464285714286|22.0532319391635	0|0|0	Chr3_5831384_5831465_R_AT3G17100.1_1
Chr2:16027311-16028260	ONT.7691	Chr2:16027448-16028260	TSS|A5SS	3	3	-	TSS.ONT.7691.2	-24.03	0.00981134	0.0148366	44.8979591836735|36.9565217391304|51.219512195122	18.1818181818182|26.530612244898|16.2790697674419	Chr2_16027311_16028260_S_TSS.ONT.7691.2_1
Chr5:8043843-8044819	AT5G23860	Chr5:8044576-8044735	IR (overlapping region)	3	3	-	AT5G23860.1	-24.24	0.000631964	0.0331633	22.5|29.1666666666667|21.0526315789474	0|0|0	Chr5_8044576_8044735_R_AT5G23860.1_1
Chr2:15165437-15166465	AT2G36120	Chr2:15165742-15166197	IR	3	3	-	AT2G36120.1	-24.27	4.36034e-05	6.48805e-05	21.7391304347826|25.5813953488372|25.4901960784314	0|0|0	Chr2_15165742_15166197_R_AT2G36120.1_1
Chr1:29331355-29333092	ONT.4996	Chr1:29332276-29332365	IR (overlapping region)	3	3	-	ONT.4996.1	-24.52	0.000926189	0.00112354	19|28|26.5625	0|0|0	Chr1_29332276_29332365_R_ONT.4996.1_1
Chr4:9545459-9546241	ONT.13983	Chr4:9545547-9546018	IR (overlapping region)	3	3	-	Ex.ONT.13983.2	-24.54	5.88636e-05	0.000259228	25|21.9512195121951|26.6666666666667	0|0|0	Chr4_9545547_9546018_R_Ex.ONT.13983.2_1
Chr1:27439452-27440464	AT1G72930	Chr1:27439974-27440071	IR	3	3	-	Ex.AT1G72930.2	-24.64	0.00123745	0.00146252	20.9375|22.3404255319149|30.6338028169014	0|0|0	Chr1_27439974_27440071_R_Ex.AT1G72930.2_1
Chr1:1477476-1478884	ONT.2770	Chr1:1477795-1478652	IR	3	3	-	Ex.ONT.2770.17	-24.68	0.000320388	0.000324942	21.2121212121212|24.2424242424242|28.5714285714286	0|0|0	Chr1_1477795_1478652_R_Ex.ONT.2770.17_1
Chr3:16945364-16945750	AT3G46130	Chr3:16945583-16945620	IR	3	3	-	AT3G46130.2	-24.75	3.59153e-07	6.59453e-07	24.5989304812834|25.4901960784314|24.1758241758242	0|0|0	Chr3_16945583_16945620_R_AT3G46130.2_1
Chr1:27439452-27440464	AT1G72930	Chr1:27439931-27440071	IR	3	3	-	Ex.AT1G72930.1	-24.79	0.00129474	0.00153018	20.9375|22.5464190981432|30.8771929824561	0|0|0	Chr1_27439931_27440071_R_Ex.AT1G72930.1_1
Chr1:29331355-29333092	ONT.4996	Chr1:29331987-29332084	IR (overlapping region)	3	3	-	ONT.4996.1	-24.8	0.00093108	0.00112944	19.1919191919192|28.2258064516129|26.984126984127	0|0|0	Chr1_29331987_29332084_R_ONT.4996.1_1
Chr2:16537459-16538279	ONT.7752	Chr2:16537638-16538106	IR	3	3	-	ONT.7752.2	-25	0.000183524	0.000280113	28.5714285714286|24.1935483870968|22.2222222222222	0|0|0	Chr2_16537638_16538106_R_ONT.7752.2_1
Chr3:17065489-17066067	ONT.11291	Chr3:17065893-17065995	IR	3	3	-	Ex.ONT.11291.3	-25.01	0.000578981	0.00106535	28|20|27.027027027027	0|0|0	Chr3_17065893_17065995_R_Ex.ONT.11291.3_1
Chr3:17065484-17066067	ONT.11291	Chr3:17065796-17065995	IR	3	3	-	Ex.ONT.11291.2	-25.01	0.000578981	0.00106535	28|20|27.027027027027	0|0|0	Chr3_17065796_17065995_R_Ex.ONT.11291.2_1
Chr3:16945364-16945750	AT3G46130	Chr3:16945551-16945620	IR	3	3	-	AT3G46130.2	-25.01	8.42067e-07	1.546e-06	25|25.8536585365854|24.1758241758242	0|0|0	Chr3_16945551_16945620_R_AT3G46130.2_1
Chr2:17073908-17074164	AT2G40920	Chr2:17073953-17073968	IR	3	3	-	AT2G40920.1	-25.05	0.000109971	0.000169657	25|27.9411764705882|22.2222222222222	0|0|0	Chr2_17073953_17073968_R_AT2G40920.1_1
Chr1:4575778-4576621	AT1G13350	Chr1:4575996-4576238	IR	3	3	-	ONT.3106.3	-25.62	0.000660793	0.000837683	21.0526315789474|25.4901960784314|30.3030303030303	0|0|0	Chr1_4575996_4576238_R_ONT.3106.3_1
Chr1:1907142-1909652	AT1G06230	Chr1:1907170-1907275	IR	3	3	-	ONT.209.5	-25.68	0.00278183	0.00297728	33.3333333333333|23.2558139534884|20.4545454545455	0|0|0	Chr1_1907170_1907275_R_ONT.209.5_1
Chr1:1907079-1909722	AT1G06230	Chr1:1907170-1907280	IR	3	3	-	Ex.ONT.209.2	-25.68	0.00278183	0.00297728	33.3333333333333|23.2558139534884|20.4545454545455	0|0|0	Chr1_1907170_1907280_R_Ex.ONT.209.2_1
Chr1:1477507-1478878	ONT.2770	Chr1:1477744-1478699	IR	3	3	-	Ex.ONT.2770.29	-25.82	0.000580744	0.000588969	24|22.5|30.952380952381	0|0|0	Chr1_1477744_1478699_R_Ex.ONT.2770.29_1
Chr1:1477507-1478874	ONT.2770	Chr1:1477744-1478703	IR	3	3	-	Ex.ONT.2770.26	-25.82	0.000580744	0.000588969	24|22.5|30.952380952381	0|0|0	Chr1_1477744_1478703_R_Ex.ONT.2770.26_1
Chr4:16186887-16189007	AT4G33740	Chr4:16186955-16187361	IR	3	3	-	Ex.AT4G33740.1	-25.86	0.000229596	0.000769184	22.1153846153846|29.2|26.271186440678	0|0|0	Chr4_16186955_16187361_R_Ex.AT4G33740.1_1
Chr4:16186830-16189007	AT4G33740	Chr4:16186955-16187358	IR	3	3	-	Ex.AT4G33740.2	-25.86	0.000229596	0.000769184	22.1153846153846|29.2|26.271186440678	0|0|0	Chr4_16186955_16187358_R_Ex.AT4G33740.2_1
Chr1:29331355-29333092	ONT.4996	Chr1:29331486-29331572	IR (overlapping region)	3	3	-	ONT.4996.1	-25.97	0.00129672	0.00157288	19.5876288659794|30|28.3333333333333	0|0|0	Chr1_29331486_29331572_R_ONT.4996.1_1
Chr1:24244376-24244991	AT1G65270	Chr1:24244537-24244794	IR	3	3	-	Ex.AT1G65270.1	-26	0.000319591	0.000363978	26.6211604095563|29.5454545454545|21.830985915493	0|0|0	Chr1_24244537_24244794_R_Ex.AT1G65270.1_1
Chr1:24244376-24244964	AT1G65270	Chr1:24244537-24244800	IR	3	3	-	Ex.ONT.1959.3	-26	0.000319591	0.000363978	26.6211604095563|29.5454545454545|21.830985915493	0|0|0	Chr1_24244537_24244800_R_Ex.ONT.1959.3_1
Chr1:24244376-24244743	AT1G65270	Chr1:24244537-24244645	IR	3	3	-	AT1G65270.2	-26.09	0.000271441	0.000309158	26.6211604095563|29.5454545454545|22.1052631578947	0|0|0	Chr1_24244537_24244645_R_AT1G65270.2_1
Chr3:19323346-19324469	AT3G52105	Chr3:19323614-19324168	IR	3	3	-	Ex.ONT.9587.3	-26.31	1.59224e-05	3.0509e-05	24.2424242424242|27.7777777777778|26.9230769230769	0|0|0	Chr3_19323614_19324168_R_Ex.ONT.9587.3_1
Chr3:9578286-9580053	AT3G26180	Chr3:9579019-9579096	IR	3	3	-	ONT.11050.2	-26.39	0.00147773	0.00388669	29.0909090909091|19.6428571428571|30.4347826086957	0|0|0	Chr3_9579019_9579096_R_ONT.11050.2_1
Chr1:7421238-7423192	AT1G21200	Chr1:7421273-7421463	IR	3	3	-	ONT.839.2	-26.57	0.000630317	0.000838207	30.7692307692308|27.5|21.4285714285714	0|0|0	Chr1_7421273_7421463_R_ONT.839.2_1
Chr1:5430386-5431003	ONT.603	Chr1:5430654-5430822	IR (overlapping region)	3	3	-	ONT.603.1	-26.67	0.00635226	0.00813801	36.6666666666667|20|23.3333333333333	0|0|0	Chr1_5430654_5430822_R_ONT.603.1_1
Chr1:4575778-4576621	AT1G13350	Chr1:4576048-4576238	IR	3	3	-	ONT.3106.3	-26.77	0.000213188	0.000270275	23.0769230769231|26.9230769230769|30.3030303030303	0|0|0	Chr1_4576048_4576238_R_ONT.3106.3_1
Chr5:26564511-26566010	AT5G66560	Chr5:26564581-26564681	IR (overlapping region)	3	3	-	Ex.AT5G66560.1	-26.9	0.00438248	0.0485783	25|20|35.7142857142857	0|0|0	Chr5_26564581_26564681_R_Ex.AT5G66560.1_1
Chr1:21742944-21743947	ONT.4293	Chr1:21743299-21743482	IR	3	3	-	ONT.4293.2	-26.92	0.00653338	0.0071887	30.7692307692308|33.3333333333333|16.6666666666667	0|0|0	Chr1_21743299_21743482_R_ONT.4293.2_1
Chr1:21742944-21743947	ONT.4293	Chr1:21743287-21743482	IR	3	3	-	ONT.4293.2	-26.92	0.00653338	0.0071887	30.7692307692308|33.3333333333333|16.6666666666667	0|0|0	Chr1_21743287_21743482_R_ONT.4293.2_1
Chr5:26399526-26400974	AT5G66010	Chr5:26399629-26400079	IR	3	3	-	ONT.17160.1	-27.08	0.000598516	0.0064395	25.8064516129032|32.3529411764706|23.0769230769231	0|0|0	Chr5_26399629_26400079_R_ONT.17160.1_1
Chr5:26399526-26400974	AT5G66010	Chr5:26399629-26400002	IR	3	3	-	ONT.17160.1	-27.08	0.000598516	0.0064395	25.8064516129032|32.3529411764706|23.0769230769231	0|0|0	Chr5_26399629_26400002_R_ONT.17160.1_1
Chr5:26564490-26566771	ONT.19426	Chr5:26566011-26566092	IR (overlapping region)	3	3	-	ONT.19426.1	-27.17	0.00952012	0.105466	25.6410256410256|17.9487179487179|37.9310344827586	0|0|0	Chr5_26566011_26566092_R_ONT.19426.1_1
Chr4:13539617-13540274	AT4G26965	Chr4:13539833-13540217	IR	3	3	-	Ex.AT4G26965.2	-27.39	8.54507e-05	0.000254654	25.8064516129032|25.5813953488372|30.7692307692308	0|0|0	Chr4_13539833_13540217_R_Ex.AT4G26965.2_1
Chr2:19319783-19320992	ONT.6572	Chr2:19320285-19320541	IR (overlapping region)	3	3	-	ONT.6572.1	-27.43	0.00855061	0.0137539	24.390243902439|19.4444444444444|38.4615384615385	0|0|0	Chr2_19320285_19320541_R_ONT.6572.1_1
Chr3:16945364-16945750	AT3G46130	Chr3:16945493-16945620	IR	3	3	-	AT3G46130.2	-27.46	1.04151e-06	1.91208e-06	27.319587628866|26.5700483091787|28.4974093264249	0|0|0	Chr3_16945493_16945620_R_AT3G46130.2_1
Chr3:5911520-5912019	AT3G17310	Chr3:5911520-5911904	A3SS	3	3	-	Ex.AT3G17310.1	-27.48	0.0088696	0.0214521	31.4814814814815|34.375|46.6666666666667	16.6666666666667|5.40540540540541|8	Chr3_5911520_5912019_S_Ex.AT3G17310.1_1
Chr1:24306667-24307501	AT1G65440	Chr1:24307236-24307287	IR	3	3	-	AT1G65440.1	-27.55	1.34794e-05	1.53584e-05	26.0869565217391|26.9230769230769|29.6296296296296	0|0|0	Chr1_24307236_24307287_R_AT1G65440.1_1
Chr3:5337548-5338556	AT3G15760	Chr3:5337897-5337974	IR	3	3	-	ONT.8715.2	-27.65	4.05201e-06	9.63209e-06	28.1818181818182|26.0869565217391|28.6764705882353	0|0|0	Chr3_5337897_5337974_R_ONT.8715.2_1
Chr2:1877685-1878219	AT2G05185	Chr2:1877798-1877970	IR	3	3	-	AT2G05185.1	-27.69	0.00423245	0.0067167	28|19.3548387096774|35.7142857142857	0|0|0	Chr2_1877798_1877970_R_AT2G05185.1_1
Chr2:1877685-1878219	AT2G05185	Chr2:1877798-1877937	IR	3	3	-	AT2G05185.1	-27.69	0.00423245	0.0067167	28|19.3548387096774|35.7142857142857	0|0|0	Chr2_1877798_1877937_R_AT2G05185.1_1
Chr1:29805551-29809514	ONT.5051	Chr1:29806726-29806802	IR	3	3	-	ONT.5051.3	-27.77	0.00882296	0.0107754	39.0625|19.672131147541|24.5901639344262	0|0|0	Chr1_29806726_29806802_R_ONT.5051.3_1
Chr1:29805551-29806725	ONT.5051	Chr1:29806575-29806660	IR	3	3	-	ONT.5051.1	-27.77	0.00882296	0.0107754	39.0625|19.672131147541|24.5901639344262	0|0|0	Chr1_29806575_29806660_R_ONT.5051.1_1
Chr3:10400284-10401760	ONT.9216	Chr3:10401058-10401204	IR (overlapping region)	3	3	-	ONT.9216.1	-27.79	0.00184626	0.0032655	23.0769230769231|35.2941176470588|25	0|0|0	Chr3_10401058_10401204_R_ONT.9216.1_1
Chr1:28041723-28042989	AT1G74650	Chr1:28041853-28042043	IR	3	3	-	ONT.2341.3	-27.8	0.00135883	0.00161868	34.2465753424658|22.2222222222222|26.9230769230769	0|0|0	Chr1_28041853_28042043_R_ONT.2341.3_1
Chr1:13468700-13469913	AT1G36070	Chr1:13469098-13469138	SES	3	3	-	ONT.3882.4	-28.29	0.00069855	0.000728075	29.8969072164948|38.961038961039|36.3636363636364	6.4327485380117|9.19540229885057|4.72972972972973	Chr1_13468700_13469913_W_ONT.3882.4_1
Chr1:28484844-28485955	AT1G75860	Chr1:28485163-28485662	IR	3	3	-	ONT.4902.2	-28.34	0.00287576	0.00344693	29.0909090909091|20.4545454545455|35.4838709677419	0|0|0	Chr1_28485163_28485662_R_ONT.4902.2_1
Chr3:21219008-21220485	AT3G57340	Chr3:21219037-21219142	IR	3	3	-	AT3G57340.2	-28.36	0.000769429	0.00156674	25|25.5813953488372|34.5070422535211	0|0|0	Chr3_21219037_21219142_R_AT3G57340.2_1
Chr1:23686682-23687293	AT1G63830	Chr1:23686698-23686895	IR	3	3	-	ONT.1895.5	-28.43	0.00494295	0.005595	37.5|20|27.7777777777778	0|0|0	Chr1_23686698_23686895_R_ONT.1895.5_1
Chr1:23686682-23687293	AT1G63830	Chr1:23686698-23686892	IR	3	3	-	ONT.1895.5	-28.43	0.00494295	0.005595	37.5|20|27.7777777777778	0|0|0	Chr1_23686698_23686892_R_ONT.1895.5_1
Chr1:23686682-23687293	AT1G63830	Chr1:23686694-23686786	IR	3	3	-	ONT.1895.5	-28.43	0.00494295	0.005595	37.5|20|27.7777777777778	0|0|0	Chr1_23686694_23686786_R_ONT.1895.5_1
Chr2:8695374-8696052	AT2G20142	Chr2:8695839-8695979	IR	3	3	-	Ex.AT2G20142.1	-28.47	5.25875e-05	8.98422e-05	31.3725490196078|28|26.0416666666667	0|0|0	Chr2_8695839_8695979_R_Ex.AT2G20142.1_1
Chr2:8695370-8697094	AT2G20142	Chr2:8695839-8696149	IR	3	3	-	ONT.5516.3	-28.47	5.25875e-05	8.98422e-05	31.3725490196078|28|26.0416666666667	0|0|0	Chr2_8695839_8696149_R_ONT.5516.3_1
Chr1:27432199-27433774	AT1G72900	Chr1:27432680-27432904	IR	3	3	-	ONT.2266.1	-28.52	0.00035663	0.000421522	27.4809160305344|24.7311827956989|33.3333333333333	0|0|0	Chr1_27432680_27432904_R_ONT.2266.1_1
Chr1:5042588-5044294	AT1G14685	Chr1:5042856-5043076	IR	3	3	-	Ex.AT1G14685.2	-28.67	9.04459e-05	0.000115441	32.2222222222222|27.3684210526316|26.4150943396226	0|0|0	Chr1_5042856_5043076_R_Ex.AT1G14685.2_1
Chr1:1477461-1478874	ONT.2770	Chr1:1477732-1478699	IR	3	3	-	Ex.ONT.2770.4	-28.68	0.000377584	0.000394353	28.3018867924528|24.390243902439|33.3333333333333	0|0|0	Chr1_1477732_1478699_R_Ex.ONT.2770.4_1
Chr2:8695980-8696643	AT2G20142	Chr2:8696053-8696149	IR	3	3	-	Ex.AT2G20142.1	-28.71	4.85778e-05	8.29992e-05	31.3725490196078|28.7234042553192|26.0416666666667	0|0|0	Chr2_8696053_8696149_R_Ex.AT2G20142.1_1
Chr4:13539642-13540274	AT4G26965	Chr4:13539829-13540217	IR	3	3	-	Ex.AT4G26965.1	-28.74	0.000141927	0.000422927	28.125|25.5813953488372|32.5	0|0|0	Chr4_13539829_13540217_R_Ex.AT4G26965.1_1
Chr2:11696800-11697448	AT2G27340	Chr2:11696937-11697448	TSS|A3SS	3	3	-	TSS.AT2G27340.1	-28.76	0.000248646	0.000352441	96.2962962962963|90.9090909090909|90.9090909090909	66.6666666666667|61.5384615384615|63.6363636363636	Chr2_11696800_11697448_S_TSS.AT2G27340.1_1
Chr3:17065848-17066571	ONT.11291	Chr3:17066068-17066317	IR	3	3	-	Ex.ONT.11291.4	-28.79	1.20241e-05	2.21281e-05	30.7692307692308|28.5714285714286|27.027027027027	0|0|0	Chr3_17066068_17066317_R_Ex.ONT.11291.4_1
Chr3:9579097-9580086	AT3G26180	Chr3:9579256-9579657	IR	3	3	-	AT3G26180.1	-28.83	0.000385483	0.00101396	30.3571428571429|23.728813559322|32.3943661971831	0|0|0	Chr3_9579256_9579657_R_AT3G26180.1_1
Chr2:18834082-18836284	AT2G45720	Chr2:18834114-18834431	IR	3	3	-	Ex.ONT.6508.2	-28.97	0.000276327	0.000440961	25|33.3333333333333|28.5714285714286	0|0|0	Chr2_18834114_18834431_R_Ex.ONT.6508.2_1
Chr1:4695639-4695978	AT1G13700	Chr1:4695954-4695978	TSS|A5SS	3	3	-	TSS.AT1G13700.1	-29.07	0.000604759	0.000768619	48.2014388489209|50.3597122302158|51.1811023622047	25.4237288135593|21.4285714285714|15.6862745098039	Chr1_4695639_4695978_S_TSS.AT1G13700.1_1
Chr1:27119208-27119676	AT1G72070	Chr1:27119271-27119413	IR	3	3	-	ONT.4752.2	-29.19	0.00025942	0.00030543	33.8983050847458|26.0869565217391|27.5862068965517	0|0|0	Chr1_27119271_27119413_R_ONT.4752.2_1
Chr1:21742944-21743947	ONT.4293	Chr1:21743610-21743756	IR	3	3	-	ONT.4293.2	-29.21	0.00348757	0.0038376	34.5238095238095|33.3333333333333|19.7802197802198	0|0|0	Chr1_21743610_21743756_R_ONT.4293.2_1
Chr2:8695370-8697094	AT2G20142	Chr2:8695839-8695950	IR	3	3	-	ONT.5516.3	-29.39	8.54207e-05	0.000145909	32.9896907216495|28|27.1739130434783	0|0|0	Chr2_8695839_8695950_R_ONT.5516.3_1
Chr3:22573459-22573609	AT3G61010	Chr3:22573459-22573528	A3SS	3	3	-	ONT.11874.1	-29.45	0.00388767	0.00823854	62.962962962963|64.5161290322581|65.3846153846154	33.3333333333333|43.9024390243902|27.2727272727273	Chr3_22573459_22573609_S_ONT.11874.1_1
Chr2:17948798-17949073	AT2G43160	Chr2:17948919-17949021	IR	3	3	-	Ex.AT2G43160.1	-29.47	7.47503e-05	0.00011694	25.990099009901|30.7228915662651|31.6901408450704	0|0|0	Chr2_17948919_17949021_R_Ex.AT2G43160.1_1
Chr1:29805551-29806725	ONT.5051	Chr1:29806065-29806165	IR	3	3	-	ONT.5051.1	-29.92	0.00164118	0.00200454	37.0967741935484|23.4375|29.2307692307692	0|0|0	Chr1_29806065_29806165_R_ONT.5051.1_1
Chr2:17948084-17948918	AT2G43160	Chr2:17948271-17948815	IR	3	3	-	Ex.AT2G43160.2	-30.34	7.12863e-05	0.000111525	26.7813267813268|31.7554240631164|32.4825986078886	0|0|0	Chr2_17948271_17948815_R_Ex.AT2G43160.2_1
Chr2:17948067-17948918	AT2G43160	Chr2:17948271-17948826	IR	3	3	-	Ex.AT2G43160.3	-30.34	7.12863e-05	0.000111525	26.7813267813268|31.7554240631164|32.4825986078886	0|0|0	Chr2_17948271_17948826_R_Ex.AT2G43160.3_1
Chr1:30022260-30022981	AT1G79820	Chr1:30022603-30022834	IR	3	3	-	Ex.AT1G79820.4	-30.45	0.000755766	0.000928422	36.3636363636364|30|25	0|0|0	Chr1_30022603_30022834_R_Ex.AT1G79820.4_1
Chr1:21742944-21743947	ONT.4293	Chr1:21743610-21743760	IR	3	3	-	ONT.4293.2	-30.67	0.00263964	0.00290482	36.046511627907|34.453781512605|21.505376344086	0|0|0	Chr1_21743610_21743760_R_ONT.4293.2_1
Chr1:23181426-23183208	AT1G62610	Chr1:23182362-23182684	IR	3	3	-	ONT.4402.1	-30.82	0.00638253	0.00718202	38.4615384615385|34.7826086956522|19.2307692307692	0|0|0	Chr1_23182362_23182684_R_ONT.4402.1_1
Chr1:23181426-23183208	AT1G62610	Chr1:23182359-23182684	IR	3	3	-	ONT.4402.1	-30.82	0.00638253	0.00718202	38.4615384615385|34.7826086956522|19.2307692307692	0|0|0	Chr1_23182359_23182684_R_ONT.4402.1_1
Chr1:23181426-23183208	AT1G62610	Chr1:23182356-23182684	IR	3	3	-	ONT.4402.1	-30.82	0.00638253	0.00718202	38.4615384615385|34.7826086956522|19.2307692307692	0|0|0	Chr1_23182356_23182684_R_ONT.4402.1_1
ChrM:146328-288108	ATMG01120	ChrM:147049-287916	IR	3	3	-	Ex.ONT.19567.1	-30.99	0.00508576	1	20.8333333333333|32.1428571428571|40	0|0|0	ChrM_147049_287916_R_Ex.ONT.19567.1_1
Chr3:21757499-21758714	AT3G58840	Chr3:21758464-21758681	IR	3	3	-	Ex.AT3G58840.2	-31.05	0.000248927	0.000516621	35.4838709677419|26.7605633802817|30.9090909090909	0|0|0	Chr3_21758464_21758681_R_Ex.AT3G58840.2_1
Chr5:4691378-4691896	AT5G14550	Chr5:4691593-4691746	IR (overlapping region)	3	3	-	AT5G14550.2	-31.18	0.000342437	0.00594087	25.974025974026|35.2941176470588|32.258064516129	0|0|0	Chr5_4691593_4691746_R_AT5G14550.2_1
Chr2:15165437-15166465	AT2G36120	Chr2:15165709-15166158	IR	3	3	-	AT2G36120.1	-31.27	0.000732749	0.00108912	24.5901639344262|35.0649350649351|34.1463414634146	0|0|0	Chr2_15165709_15166158_R_AT2G36120.1_1
Chr4:9545033-9545813	ONT.12509	Chr4:9545225-9545458	IR (overlapping region)	3	3	-	ONT.12509.1	-31.57	0.0039414	0.0173554	27.027027027027|25.5813953488372|42.1052631578947	0|0|0	Chr4_9545225_9545458_R_ONT.12509.1_1
Chr1:13078916-13079304	AT1G35516	Chr1:13078916-13078929	A5SS	3	3	-	AT1G35516.1	-31.61	0.000375076	0.000390641	40.2777777777778|46.8354430379747|42.6966292134831	7.84313725490196|15.1260504201681|12	Chr1_13078916_13079304_S_AT1G35516.1_1
Chr1:845952-847683	AT1G03410	Chr1:846478-846729	IR	3	3	-	AT1G03410.1	-31.84	0.000543529	0.000735791	38.0952380952381|28|29.4117647058824	0|0|0	Chr1_846478_846729_R_AT1G03410.1_1
Chr1:25137172-25137932	ONT.4565	Chr1:25137663-25137893	IR	3	3	-	ONT.4565.2	-31.91	0.000155683	0.000179239	34.6938775510204|27.3504273504274|33.6734693877551	0|0|0	Chr1_25137663_25137893_R_ONT.4565.2_1
Chr3:10400284-10401760	ONT.9216	Chr3:10400895-10400992	IR (overlapping region)	3	3	-	ONT.9216.1	-32.01	0.000741448	0.00131147	28.5714285714286|38.8888888888889|28.5714285714286	0|0|0	Chr3_10400895_10400992_R_ONT.9216.1_1
Chr1:11453714-11455181	ONT.1197	Chr1:11453750-11454507	IR (overlapping region)	3	3	-	ONT.1197.4	-32.3	0.00141028	0.00145045	24.4444444444444|38.2978723404255|34.1463414634146	0|0|0	Chr1_11453750_11454507_R_ONT.1197.4_1
Chr1:25137172-25137932	ONT.4565	Chr1:25137663-25137843	IR	3	3	-	ONT.4565.2	-32.33	0.000132927	0.000153044	35.3535353535354|27.9661016949153|33.6734693877551	0|0|0	Chr1_25137663_25137843_R_ONT.4565.2_1
Chr1:11453714-11455181	ONT.1197	Chr1:11453750-11454511	IR (overlapping region)	3	3	-	ONT.1197.4	-32.82	0.00151831	0.00156147	24.4444444444444|38.2978723404255|35.7142857142857	0|0|0	Chr1_11453750_11454511_R_ONT.1197.4_1
Chr2:6518888-6519921	AT2G15050	Chr2:6519247-6519878	IR	3	3	-	Ex.AT2G15050.3	-33.12	1.74318e-06	2.89414e-06	33.0677290836653|34.4827586206897|31.8181818181818	0|0|0	Chr2_6519247_6519878_R_Ex.AT2G15050.3_1
Chr2:6518840-6520160	AT2G15050	Chr2:6519226-6519878	IR	3	3	-	Ex.AT2G15050.2	-33.19	2.34321e-06	3.89017e-06	33.0677290836653|34.6875|31.8181818181818	0|0|0	Chr2_6519226_6519878_R_Ex.AT2G15050.2_1
Chr2:18132789-18133188	AT2G43760	Chr2:18132789-18133081	A5SS	3	3	-	AT2G43760.1	-33.29	0.000229321	0.000360364	45.7547169811321|43.421052631579|39.4594594594595	7.34463276836158|13.3689839572193|8.04020100502512	Chr2_18132789_18133188_S_AT2G43760.1_1
Chr2:5864894-5865603	ONT.6809	Chr2:5865237-5865318	IR	3	3	-	ONT.6809.2	-33.41	0.00155671	0.00257176	28.5714285714286|42.1052631578947|29.5454545454545	0|0|0	Chr2_5865237_5865318_R_ONT.6809.2_1
Chr5:22751493-22752732	AT5G56210	Chr5:22751752-22752569	IR	3	3	-	AT5G56210.1	-33.79	0.00295703	0.0219861	32.0754716981132|43.5897435897436|25.7142857142857	0|0|0	Chr5_22751752_22752569_R_AT5G56210.1_1
Chr2:15165437-15166465	AT2G36120	Chr2:15165699-15166158	IR	3	3	-	AT2G36120.1	-34.24	0.00011873	0.000176557	30.3030303030303|38.2716049382716|34.1463414634146	0|0|0	Chr2_15165699_15166158_R_AT2G36120.1_1
Chr1:29331355-29333092	ONT.4996	Chr1:29332452-29332544	IR (overlapping region)	3	3	-	ONT.4996.1	-35.25	0.00101597	0.00123238	27.027027027027|39.4736842105263|39.2405063291139	0|0|0	Chr1_29332452_29332544_R_ONT.4996.1_1
Chr2:15165437-15166465	AT2G36120	Chr2:15165709-15166149	IR	3	3	-	AT2G36120.1	-35.34	0.00316561	0.00470409	24.1935483870968|40.9090909090909|40.9090909090909	0|0|0	Chr2_15165709_15166149_R_AT2G36120.1_1
Chr4:13361964-13364393	AT4G26450	Chr4:13362432-13362547	IR	3	3	-	Ex.ONT.12875.3	-35.97	0.000174776	0.000516853	34.0659340659341|32.6086956521739|41.2371134020619	0|0|0	Chr4_13362432_13362547_R_Ex.ONT.12875.3_1
Chr1:24965309-24967436	AT1G66920	Chr1:24966162-24966239	IR	3	3	-	ONT.4554.5	-36.05	0.00312877	0.00359512	30.7692307692308|47.3684210526316|30	0|0|0	Chr1_24966162_24966239_R_ONT.4554.5_1
Chr3:18862058-18863228	ONT.9521	Chr3:18862738-18862822	IR (overlapping region)	3	3	-	ONT.9521.1	-36.1	1.37305e-06	2.59529e-06	36.3636363636364|34.6153846153846|37.3134328358209	0|0|0	Chr3_18862738_18862822_R_ONT.9521.1_1
Chr5:25737204-25738602	AT5G64360	Chr5:25737609-25737734	IR	3	3	-	AT5G64360.2	-36.2	0.00118232	0.0114645	42.8571428571429|27.906976744186|37.8378378378378	0|0|0	Chr5_25737609_25737734_R_AT5G64360.2_1
Chr4:13361967-13364393	AT4G26450	Chr4:13362276-13362547	IR	3	3	-	Ex.ONT.12875.4	-36.21	0.000136578	0.000403923	34.0659340659341|33.3333333333333|41.2371134020619	0|0|0	Chr4_13362276_13362547_R_Ex.ONT.12875.4_1
Chr3:10400284-10401760	ONT.9216	Chr3:10400403-10400766	IR (overlapping region)	3	3	-	ONT.9216.1	-36.26	0.000243145	0.000430093	33.3333333333333|42.1052631578947|33.3333333333333	0|0|0	Chr3_10400403_10400766_R_ONT.9216.1_1
Chr1:2444066-2444549	AT1G07920	Chr1:2444156-2444433	IR (overlapping region)	3	3	-	Ex.ONT.272.4	-36.68	0.000116962	0.000133606	40.7407407407407|37.037037037037|32.258064516129	0|0|0	Chr1_2444156_2444433_R_Ex.ONT.272.4_1
Chr1:13468700-13469913	AT1G36070	Chr1:13469098-13469913	A5SS	3	3	-	ONT.3882.3	-36.7	0.000421827	0.000439669	41.1764705882353|52.3809523809524|46.1538461538462	10.2272727272727|11.4942528735632|7.89473684210526	Chr1_13468700_13469913_S_ONT.3882.3_1
Chr5:13857921-13858623	AT5G35680	Chr5:13858151-13858202	IR	3	3	-	AT5G35680.2	-36.84	0.00957852	0.0451749	29.5081967213115|52.6315789473684|28.3783783783784	0|0|0	Chr5_13858151_13858202_R_AT5G35680.2_1
Chr1:2395445-2397379	ONT.265	Chr1:2396435-2396528	IR (overlapping region)	3	3	-	ONT.265.2	-37.1	0.00341948	0.00387943	29.5454545454545|32.8571428571429|48.8888888888889	0|0|0	Chr1_2396435_2396528_R_ONT.265.2_1
Chr2:10125368-10127521	AT2G23790	Chr2:10126151-10126903	IR	3	3	-	Ex.AT2G23790.1	-37.32	0.00992164	0.0136185	29.6875|53.4883720930233|28.7878787878788	0|0|0	Chr2_10126151_10126903_R_Ex.AT2G23790.1_1
Chr2:15165437-15166465	AT2G36120	Chr2:15165619-15166116	IR	3	3	-	AT2G36120.1	-37.82	0.0003949	0.000587026	32.8125|36.2068965517241|44.4444444444444	0|0|0	Chr2_15165619_15166116_R_AT2G36120.1_1
Chr1:29220380-29221734	AT1G77740	Chr1:29220575-29220594	IR	3	3	-	ONT.2461.2	-37.92	4.93229e-05	5.97261e-05	40.9090909090909|38.8349514563107|34.020618556701	0|0|0	Chr1_29220575_29220594_R_ONT.2461.2_1
Chr2:16539388-16540436	ONT.7753	Chr2:16539672-16540239	IR	3	3	-	ONT.7753.2	-37.99	0.000524398	0.000800357	45.4545454545455|34.1463414634146|34.375	0|0|0	Chr2_16539672_16540239_R_ONT.7753.2_1
Chr2:15165437-15166465	AT2G36120	Chr2:15165646-15166154	IR	3	3	-	AT2G36120.1	-38.08	9.38972e-05	0.000139656	39.7435897435897|41.1764705882353|33.3333333333333	0|0|0	Chr2_15165646_15166154_R_AT2G36120.1_1
Chr2:6518843-6520619	AT2G15050	Chr2:6519226-6520241	IR	3	3	-	Ex.ONT.5344.4	-38.25	6.33465e-10	1.05176e-09	38.4615384615385|38.2488479262673|38.0368098159509	0|0|0	Chr2_6519226_6520241_R_Ex.ONT.5344.4_1
Chr1:6969909-6970953	AT1G20100	Chr1:6970180-6970618	IR	3	3	-	ONT.3386.2	-38.36	0.000275855	0.000364876	43.0555555555556|32.258064516129|39.7590361445783	0|0|0	Chr1_6970180_6970618_R_ONT.3386.2_1
Chr2:11721532-11722467	ONT.7257	Chr2:11721729-11722300	IR	3	3	-	ONT.7257.2	-38.49	0.00134598	0.00190913	42.3076923076923|44.2622950819672|28.8888888888889	0|0|0	Chr2_11721729_11722300_R_ONT.7257.2_1
Chr2:15165437-15166465	AT2G36120	Chr2:15165619-15166119	IR	3	3	-	AT2G36120.1	-38.53	0.000247621	0.000368107	33.8461538461538|37.2881355932203|44.4444444444444	0|0|0	Chr2_15165619_15166119_R_AT2G36120.1_1
Chr1:27118621-27119270	AT1G72070	Chr1:27118974-27119207	IR (overlapping region)	3	3	-	Ex.AT1G72070.1	-38.63	0.000475017	0.000559246	45.0704225352113|38.5542168674699|32.258064516129	0|0|0	Chr1_27118974_27119207_R_Ex.AT1G72070.1_1
Chr2:15165437-15166465	AT2G36120	Chr2:15165696-15166149	IR	3	3	-	AT2G36120.1	-38.69	0.000654553	0.000972929	30.8823529411765|44.2857142857143|40.9090909090909	0|0|0	Chr2_15165696_15166149_R_AT2G36120.1_1
Chr3:21397684-21398820	AT3G57770	Chr3:21398301-21398370	IR	3	3	-	ONT.9816.2	-38.74	0.00489779	0.0100445	32.1428571428571|52.5|31.5789473684211	0|0|0	Chr3_21398301_21398370_R_ONT.9816.2_1
Chr1:18132683-18133923	AT1G49010	Chr1:18133139-18133258	IR	3	3	-	ONT.1449.2	-38.94	0.00396571	0.00420992	25.9259259259259|44.5544554455446|46.3414634146341	0|0|0	Chr1_18133139_18133258_R_ONT.1449.2_1
Chr2:15165437-15166465	AT2G36120	Chr2:15165595-15166158	IR	3	3	-	AT2G36120.1	-39.26	0.000104945	0.000156069	41.7721518987342|41.8604651162791|34.1463414634146	0|0|0	Chr2_15165595_15166158_R_AT2G36120.1_1
Chr3:21468314-21469292	ONT.9823	Chr3:21468767-21468852	IR (overlapping region)	3	3	-	ONT.9823.1	-39.75	0.00119504	0.00245556	31.25|40|48	0|0|0	Chr3_21468767_21468852_R_ONT.9823.1_1
Chr1:13078138-13079766	AT1G35515	Chr1:13078268-13079304	IR	3	3	-	ONT.1310.1	-39.91	1.05988e-05	1.1039e-05	37.9310344827586|42.7536231884058|39.041095890411	0|0|0	Chr1_13078268_13079304_R_ONT.1310.1_1
Chr5:7513529-7514453	AT5G22608	Chr5:7513642-7513918	IR	3	3	-	ONT.15782.2	-40.4	0.00187428	0.0736149	29.4117647058824|44.7368421052632|47.0588235294118	0|0|0	Chr5_7513642_7513918_R_ONT.15782.2_1
Chr2:10125368-10127526	AT2G23790	Chr2:10126661-10126903	IR	3	3	-	Ex.ONT.7114.3	-40.4	0.00744831	0.010224	31.8181818181818|56.5217391304348|32.8571428571429	0|0|0	Chr2_10126661_10126903_R_Ex.ONT.7114.3_1
Chr5:7513919-7514453	AT5G22608	Chr5:7514032-7514204	IR	3	3	-	AT5G22608.1	-40.67	0.00378933	0.148525	27.2727272727273|46.1538461538462|48.5714285714286	0|0|0	Chr5_7514032_7514204_R_AT5G22608.1_1
Chr5:7513919-7514453	AT5G22608	Chr5:7514032-7514171	IR	3	3	-	AT5G22608.1	-40.67	0.00378933	0.148525	27.2727272727273|46.1538461538462|48.5714285714286	0|0|0	Chr5_7514032_7514171_R_AT5G22608.1_1
Chr2:15165437-15166465	AT2G36120	Chr2:15165685-15166149	IR	3	3	-	AT2G36120.1	-41.12	2.04435e-05	3.04348e-05	38.1578947368421|44.2857142857143|40.9090909090909	0|0|0	Chr2_15165685_15166149_R_AT2G36120.1_1
Chr2:15165437-15166465	AT2G36120	Chr2:15165676-15166149	IR	3	3	-	AT2G36120.1	-41.12	2.04435e-05	3.04348e-05	38.1578947368421|44.2857142857143|40.9090909090909	0|0|0	Chr2_15165676_15166149_R_AT2G36120.1_1
Chr2:15165437-15166465	AT2G36120	Chr2:15165658-15166149	IR	3	3	-	AT2G36120.1	-41.12	2.04435e-05	3.04348e-05	38.1578947368421|44.2857142857143|40.9090909090909	0|0|0	Chr2_15165658_15166149_R_AT2G36120.1_1
Chr2:15165437-15166465	AT2G36120	Chr2:15165637-15166149	IR	3	3	-	AT2G36120.1	-41.12	2.04435e-05	3.04348e-05	38.1578947368421|44.2857142857143|40.9090909090909	0|0|0	Chr2_15165637_15166149_R_AT2G36120.1_1
Chr2:15165437-15166465	AT2G36120	Chr2:15165628-15166149	IR	3	3	-	AT2G36120.1	-41.12	2.04435e-05	3.04348e-05	38.1578947368421|44.2857142857143|40.9090909090909	0|0|0	Chr2_15165628_15166149_R_AT2G36120.1_1
Chr2:15165437-15166465	AT2G36120	Chr2:15165601-15166163	IR	3	3	-	AT2G36120.1	-41.44	4.64435e-05	6.91039e-05	44.578313253012|42.5287356321839|37.2093023255814	0|0|0	Chr2_15165601_15166163_R_AT2G36120.1_1
Chr2:15165437-15166465	AT2G36120	Chr2:15165625-15166119	IR	3	3	-	AT2G36120.1	-41.59	0.000135655	0.000201693	45.8333333333333|36.0655737704918|42.8571428571429	0|0|0	Chr2_15165625_15166119_R_AT2G36120.1_1
Chr2:15165437-15166465	AT2G36120	Chr2:15165685-15166152	IR	3	3	-	AT2G36120.1	-41.63	4.97694e-05	7.40496e-05	38.1578947368421|45.8333333333333|40.9090909090909	0|0|0	Chr2_15165685_15166152_R_AT2G36120.1_1
Chr2:15165437-15166465	AT2G36120	Chr2:15165658-15166152	IR	3	3	-	AT2G36120.1	-41.9	3.35042e-05	4.98551e-05	38.961038961039|45.8333333333333|40.9090909090909	0|0|0	Chr2_15165658_15166152_R_AT2G36120.1_1
Chr2:15165437-15166465	AT2G36120	Chr2:15165646-15166151	IR	3	3	-	AT2G36120.1	-41.9	3.35042e-05	4.98551e-05	38.961038961039|45.8333333333333|40.9090909090909	0|0|0	Chr2_15165646_15166151_R_AT2G36120.1_1
Chr2:15165437-15166465	AT2G36120	Chr2:15165625-15166152	IR	3	3	-	AT2G36120.1	-41.9	3.35042e-05	4.98551e-05	38.961038961039|45.8333333333333|40.9090909090909	0|0|0	Chr2_15165625_15166152_R_AT2G36120.1_1
Chr2:15165437-15166465	AT2G36120	Chr2:15165592-15166152	IR	3	3	-	AT2G36120.1	-41.9	3.35042e-05	4.98551e-05	38.961038961039|45.8333333333333|40.9090909090909	0|0|0	Chr2_15165592_15166152_R_AT2G36120.1_1
Chr1:13078138-13079766	AT1G35515	Chr1:13078916-13079304	IR (overlapping region)	3	3	-	ONT.1310.1	-42.19	1.62005e-06	1.68747e-06	41.9354838709677|43.9716312056738|40.6666666666667	0|0|0	Chr1_13078916_13079304_R_ONT.1310.1_1
Chr3:9710756-9711460	AT3G26510	Chr3:9711339-9711399	IR	3	3	-	ONT.11068.3	-42.3	5.53036e-06	1.45881e-05	43.75|39.6825396825397|43.4782608695652	0|0|0	Chr3_9711339_9711399_R_ONT.11068.3_1
Chr1:13078138-13079766	AT1G35515	Chr1:13078930-13079304	IR (overlapping region)	3	3	-	ONT.1310.1	-42.32	2.5839e-06	2.69127e-06	41.9354838709677|44.3661971830986|40.6666666666667	0|0|0	Chr1_13078930_13079304_R_ONT.1310.1_1
Chr4:16187056-16187676	AT4G33740	Chr4:16187197-16187361	IR	3	3	-	Ex.ONT.13184.5	-43.24	7.31345e-05	0.000245055	38.121546961326|46.1928934010152|45.4106280193237	0|0|0	Chr4_16187197_16187361_R_Ex.ONT.13184.5_1
Chr2:15165437-15166465	AT2G36120	Chr2:15165628-15166137	IR	3	3	-	AT2G36120.1	-43.32	0.000112618	0.000167474	48|38.0952380952381|43.859649122807	0|0|0	Chr2_15165628_15166137_R_AT2G36120.1_1
Chr2:15165437-15166465	AT2G36120	Chr2:15165518-15166158	IR	3	3	-	AT2G36120.1	-43.9	3.01832e-05	4.49222e-05	41.7721518987342|41.8604651162791|48.0769230769231	0|0|0	Chr2_15165518_15166158_R_AT2G36120.1_1
Chr2:17946468-17947012	AT2G43150	Chr2:17946568-17946650	IR	3	3	-	Ex.ONT.6395.1	-44.15	4.89154e-08	7.6533e-08	43.5643564356436|44.9648711943794|43.9276485788114	0|0|0	Chr2_17946568_17946650_R_Ex.ONT.6395.1_1
Chr2:17945893-17946567	AT2G43150	Chr2:17946015-17946468	IR	3	3	-	AT2G43150.1	-44.57	1.75594e-08	2.74745e-08	44.299674267101|45.2214452214452|44.1860465116279	0|0|0	Chr2_17946015_17946468_R_AT2G43150.1_1
Chr3:2296092-2296625	ONT.10312	Chr3:2296386-2296528	IR	3	3	-	Ex.ONT.10312.3	-44.69	7.50381e-05	0.000160616	41.5094339622642|42.5531914893617|50	0|0|0	Chr3_2296386_2296528_R_Ex.ONT.10312.3_1
Chr5:19005601-19006277	AT5G46840	Chr5:19005680-19005737	IR	3	3	-	AT5G46840.1	-44.97	0.00938002	0.0542688	53.125|25.8620689655172|55.9322033898305	0|0|0	Chr5_19005680_19005737_R_AT5G46840.1_1
Chr2:15165437-15166465	AT2G36120	Chr2:15165628-15166143	IR	3	3	-	AT2G36120.1	-45.26	0.000139193	0.000206945	50.9433962264151|40|44.8275862068966	0|0|0	Chr2_15165628_15166143_R_AT2G36120.1_1
Chr2:1382574-1383499	ONT.6732	Chr2:1382858-1383047	IR	3	3	-	ONT.6732.2	-45.36	7.53396e-05	0.000110082	50.7936507936508|42.6229508196721|42.6666666666667	0|0|0	Chr2_1382858_1383047_R_ONT.6732.2_1
Chr1:21214139-21215404	ONT.4258	Chr1:21214790-21215106	IR	3	3	-	ONT.4258.1	-45.45	0.000142026	0.000156701	50|39.2857142857143|47.0588235294118	0|0|0	Chr1_21214790_21215106_R_ONT.4258.1_1
Chr3:2296529-2297735	ONT.10312	Chr3:2296626-2296708	IR	3	3	-	Ex.ONT.10312.1	-45.61	0.000135688	0.000290403	41.5094339622642|43.4782608695652|51.8518518518518	0|0|0	Chr3_2296626_2296708_R_Ex.ONT.10312.1_1
Chr3:2296529-2296814	ONT.10312	Chr3:2296568-2296708	IR	3	3	-	Ex.ONT.10312.4	-45.61	0.000135688	0.000290403	41.5094339622642|43.4782608695652|51.8518518518518	0|0|0	Chr3_2296568_2296708_R_Ex.ONT.10312.4_1
Chr3:2409727-2411294	AT3G07550	Chr3:2409821-2409930	IR	3	3	-	AT3G07550.2	-45.76	0.000119665	0.00025998	51.8518518518518|41.9354838709677|43.4782608695652	0|0|0	Chr3_2409821_2409930_R_AT3G07550.2_1
Chr4:15179128-15180820	ONT.13073	Chr4:15179875-15179961	IR (overlapping region)	3	3	-	ONT.13073.1	-45.98	0.00122315	0.00387009	57.1428571428571|39.1304347826087|41.6666666666667	0|0|0	Chr4_15179875_15179961_R_ONT.13073.1_1
Chr2:2087173-2088028	AT2G05632	Chr2:2087593-2087920	IR	3	3	-	ONT.6764.1	-46.05	0.00712492	0.0115903	41.1764705882353|63.6363636363636|33.3333333333333	0|0|0	Chr2_2087593_2087920_R_ONT.6764.1_1
Chr2:15165437-15166465	AT2G36120	Chr2:15165682-15166197	IR	3	3	-	AT2G36120.1	-46.57	0.000757049	0.00112519	36.8421052631579|49.2063492063492|53.6585365853659	0|0|0	Chr2_15165682_15166197_R_AT2G36120.1_1
Chr2:18866061-18867160	AT2G45830	Chr2:18866504-18866606	IR (overlapping region)	3	3	-	AT2G45830.2	-46.63	0.000126901	0.000202721	45|42.1052631578947|52.7777777777778	0|0|0	Chr2_18866504_18866606_R_AT2G45830.2_1
Chr2:15165437-15166465	AT2G36120	Chr2:15165628-15166146	IR	3	3	-	AT2G36120.1	-46.73	2.94923e-05	4.38957e-05	50.9433962264151|43.4782608695652|45.7627118644068	0|0|0	Chr2_15165628_15166146_R_AT2G36120.1_1
Chr2:15165437-15166465	AT2G36120	Chr2:15165625-15166146	IR	3	3	-	AT2G36120.1	-46.73	2.94923e-05	4.38957e-05	50.9433962264151|43.4782608695652|45.7627118644068	0|0|0	Chr2_15165625_15166146_R_AT2G36120.1_1
Chr2:15165437-15166465	AT2G36120	Chr2:15165511-15166152	IR	3	3	-	AT2G36120.1	-47.4	0.000761353	0.0011315	38.961038961039|46.5753424657534|56.6666666666667	0|0|0	Chr2_15165511_15166152_R_AT2G36120.1_1
Chr3:2409931-2411294	AT3G07550	Chr3:2410284-2410439	IR	3	3	-	AT3G07550.1	-47.91	1.76553e-05	3.83593e-05	51.8518518518518|46.4285714285714|45.4545454545455	0|0|0	Chr3_2410284_2410439_R_AT3G07550.1_1
Chr2:2023545-2023993	ONT.5270	Chr2:2023677-2023779	IR	3	3	-	ONT.5270.1	-48.47	0.00496175	0.00808626	32.1428571428571|51.7241379310345|61.5384615384615	0|0|0	Chr2_2023677_2023779_R_ONT.5270.1_1
Chr2:15165437-15166465	AT2G36120	Chr2:15165676-15166191	IR	3	3	-	AT2G36120.1	-48.89	2.18248e-05	3.24898e-05	44.6153846153846|50.7692307692308|51.2820512820513	0|0|0	Chr2_15165676_15166191_R_AT2G36120.1_1
ChrM:133177-134775	ATMG00510	ChrM:133246-134308	IR	3	3	-	Ex.ATMG00510.1	-49.05	0.000177114	0.67477	42.3076923076923|50|54.8387096774194	0|0|0	ChrM_133246_134308_R_Ex.ATMG00510.1_1
Chr2:8969417-8970630	AT2G20830	Chr2:8969812-8970013	IR	3	3	-	AT2G20830.1	-49.25	4.93844e-08	8.50449e-08	49.3670886075949|48.3870967741936|50	0|0|0	Chr2_8969812_8970013_R_AT2G20830.1_1
Chr2:2023260-2023998	ONT.5270	Chr2:2023458-2023544	IR	3	3	-	ONT.5270.2	-49.25	0.00338541	0.00551751	34.4827586206897|51.7241379310345|61.5384615384615	0|0|0	Chr2_2023458_2023544_R_ONT.5270.2_1
Chr1:109032-111609	AT1G01260	Chr1:109331-109412	IR	3	3	-	AT1G01260.1	-49.43	0.00140056	0.00141995	50|38.2978723404255|60	0|0|0	Chr1_109331_109412_R_AT1G01260.1_1
Chr1:109032-111609	AT1G01260	Chr1:109331-109405	IR	3	3	-	AT1G01260.1	-49.43	0.00140056	0.00141995	50|38.2978723404255|60	0|0|0	Chr1_109331_109405_R_AT1G01260.1_1
Chr2:8969417-8970630	AT2G20830	Chr2:8969812-8970017	IR	3	3	-	AT2G20830.1	-49.75	4.70977e-08	8.11106e-08	49.3670886075949|49.2063492063492|50.6849315068493	0|0|0	Chr2_8969812_8970017_R_AT2G20830.1_1
ChrC:11529-12798	ATCG00130	ChrC:11939-12653	IR	3	3	-	Ex.ATCG00130.1	-50.75	3.38979e-05	0.198222	45.7865168539326|53.3434650455927|53.1305903398927	0|0|0	ChrC_11939_12653_R_Ex.ATCG00130.1_1
Chr3:2296709-2297735	ONT.10312	Chr3:2296815-2297716	IR	3	3	-	ONT.10312.1	-51.27	6.29836e-05	0.000134837	46.9387755102041|50|56.8627450980392	0|0|0	Chr3_2296815_2297716_R_ONT.10312.1_1
Chr2:15165437-15166465	AT2G36120	Chr2:15165619-15166192	IR	3	3	-	AT2G36120.1	-51.29	2.4159e-06	3.59788e-06	48.8095238095238|53.1645569620253|51.8987341772152	0|0|0	Chr2_15165619_15166192_R_AT2G36120.1_1
Chr2:15165437-15166465	AT2G36120	Chr2:15165619-15166194	IR	3	3	-	AT2G36120.1	-51.89	1.93773e-06	2.88587e-06	49.4117647058824|53.1645569620253|53.0864197530864	0|0|0	Chr2_15165619_15166194_R_AT2G36120.1_1
Chr2:13863730-13864600	AT2G32690	Chr2:13864029-13864322	IR	3	3	-	Ex.ONT.7457.40	-52.41	0.000225793	0.000330171	44.1176470588235|56.6666666666667|56.4516129032258	0|0|0	Chr2_13864029_13864322_R_Ex.ONT.7457.40_1
Chr2:13863725-13864600	AT2G32690	Chr2:13864026-13864322	IR	3	3	-	Ex.ONT.7457.21	-52.41	0.000225793	0.000330171	44.1176470588235|56.6666666666667|56.4516129032258	0|0|0	Chr2_13864026_13864322_R_Ex.ONT.7457.21_1
ChrC:43496-45978	ATCG00360	ChrC:43754-44467	IR	3	3	-	Ex.ONT.19529.1	-52.51	5.8822e-06	0.11205	54.5454545454545|49.2307692307692|53.75	0|0|0	ChrC_43754_44467_R_Ex.ONT.19529.1_1
Chr2:2327635-2329691	AT2G06000	Chr2:2327694-2327890	IR	3	3	-	AT2G06000.1	-52.51	0.000704112	0.00115442	63.6363636363636|47.2222222222222|46.6666666666667	0|0|0	Chr2_2327694_2327890_R_AT2G06000.1_1
Chr2:15165437-15166465	AT2G36120	Chr2:15165617-15166187	IR	3	3	-	AT2G36120.1	-52.63	2.64277e-05	3.93374e-05	48.1927710843374|53.1645569620253|56.5217391304348	0|0|0	Chr2_15165617_15166187_R_AT2G36120.1_1
Chr2:15165437-15166465	AT2G36120	Chr2:15165615-15166187	IR	3	3	-	AT2G36120.1	-52.63	2.64277e-05	3.93374e-05	48.1927710843374|53.1645569620253|56.5217391304348	0|0|0	Chr2_15165615_15166187_R_AT2G36120.1_1
Chr2:15165437-15166465	AT2G36120	Chr2:15165619-15166196	IR	3	3	-	AT2G36120.1	-52.8	9.11291e-06	1.35698e-05	49.4117647058824|53.1645569620253|55.8139534883721	0|0|0	Chr2_15165619_15166196_R_AT2G36120.1_1
Chr2:13863726-13864588	AT2G32690	Chr2:13864023-13864317	IR	3	3	-	Ex.ONT.7457.22	-52.92	0.000189459	0.000277083	44.9275362318841|57.3770491803279|56.4516129032258	0|0|0	Chr2_13864023_13864317_R_Ex.ONT.7457.22_1
Chr1:9184663-9187524	AT1G26580	Chr1:9185279-9185581	IR	3	3	-	ONT.1003.3	-52.98	0.000536597	0.000734893	44.4444444444444|52|62.5	0|0|0	Chr1_9185279_9185581_R_ONT.1003.3_1
Chr1:7453687-7455008	AT1G21310	Chr1:7453803-7454810	IR	3	3	-	Ex.ONT.3433.2	-53.09	0.000319009	0.000421941	59.2592592592593|44.1176470588235|55.8823529411765	0|0|0	Chr1_7453803_7454810_R_Ex.ONT.3433.2_1
Chr3:16945493-16945620	AT3G46130	Chr3:16945493-16945550	TSS|A5SS	3	3	-	TSS.AT3G46130.1	-53.19	0.00200134	0.00367403	65|60.7142857142857|53.8461538461538	0|20|0	Chr3_16945493_16945620_S_TSS.AT3G46130.1_1
Chr4:10477295-10477887	AT4G19160	Chr4:10477531-10477820	IR	3	3	-	ONT.12597.3	-53.36	6.38457e-06	1.72952e-05	55.6561085972851|54.4186046511628|50	0|0|0	Chr4_10477531_10477820_R_ONT.12597.3_1
Chr2:13863732-13864600	AT2G32690	Chr2:13864026-13864361	IR	3	3	-	Ex.ONT.7457.46	-53.37	0.000339759	0.000496668	44.1176470588235|56.6666666666667|59.3220338983051	0|0|0	Chr2_13864026_13864361_R_Ex.ONT.7457.46_1
Chr2:13863729-13864600	AT2G32690	Chr2:13864029-13864361	IR	3	3	-	Ex.ONT.7457.31	-53.37	0.000339759	0.000496668	44.1176470588235|56.6666666666667|59.3220338983051	0|0|0	Chr2_13864029_13864361_R_Ex.ONT.7457.31_1
Chr2:13863724-13864600	AT2G32690	Chr2:13864026-13864367	IR	3	3	-	Ex.ONT.7457.16	-53.37	0.000339759	0.000496668	44.1176470588235|56.6666666666667|59.3220338983051	0|0|0	Chr2_13864026_13864367_R_Ex.ONT.7457.16_1
Chr2:13863724-13864591	AT2G32690	Chr2:13864026-13864346	IR	3	3	-	Ex.ONT.7457.7	-53.37	0.000339759	0.000496668	44.1176470588235|56.6666666666667|59.3220338983051	0|0|0	Chr2_13864026_13864346_R_Ex.ONT.7457.7_1
Chr5:10301724-10304414	AT5G28320	Chr5:10302899-10302954	IR	3	3	-	ONT.15977.1	-53.48	0.000633354	0.0028753	50|46.1538461538462|64.2857142857143	0|0|0	Chr5_10302899_10302954_R_ONT.15977.1_1
Chr1:25598170-25598438	AT1G68290	Chr1:25598321-25598411	IR (overlapping region)	3	3	-	AT1G68290.1	-53.54	0.00608717	0.00704677	63.6363636363636|33.3333333333333|63.6363636363636	0|0|0	Chr1_25598321_25598411_R_AT1G68290.1_1
Chr2:15165437-15166465	AT2G36120	Chr2:15165625-15166197	IR	3	3	-	AT2G36120.1	-54.13	6.55739e-06	9.76483e-06	53.8461538461538|51.25|57.3033707865169	0|0|0	Chr2_15165625_15166197_R_AT2G36120.1_1
Chr2:13863724-13864595	AT2G32690	Chr2:13864029-13864289	IR	3	3	-	Ex.ONT.7457.10	-54.14	0.000218612	0.000319694	45.7142857142857|57.3770491803279|59.3220338983051	0|0|0	Chr2_13864029_13864289_R_Ex.ONT.7457.10_1
Chr2:13863722-13864600	AT2G32690	Chr2:13864024-13864299	IR	3	3	-	Ex.ONT.7457.5	-54.14	0.000218612	0.000319694	45.7142857142857|57.3770491803279|59.3220338983051	0|0|0	Chr2_13864024_13864299_R_Ex.ONT.7457.5_1
Chr2:13863730-13864597	AT2G32690	Chr2:13864026-13864289	IR	3	3	-	Ex.ONT.7457.36	-54.33	0.000329193	0.000481314	44.9275362318841|58.0645161290323|60	0|0|0	Chr2_13864026_13864289_R_Ex.ONT.7457.36_1
Chr1:30358185-30359373	AT1G80780	Chr1:30358296-30358394	IR	3	3	-	Ex.ONT.2589.2	-54.51	1.3548e-09	1.67588e-09	54.8514851485149|54.1247484909457|54.5643153526971	0|0|0	Chr1_30358296_30358394_R_Ex.ONT.2589.2_1
Chr1:30358184-30359373	AT1G80780	Chr1:30358296-30358378	IR	3	3	-	Ex.AT1G80780.1	-54.51	1.3548e-09	1.67588e-09	54.8514851485149|54.1247484909457|54.5643153526971	0|0|0	Chr1_30358296_30358378_R_Ex.AT1G80780.1_1
Chr2:15165437-15166465	AT2G36120	Chr2:15165601-15166194	IR	3	3	-	AT2G36120.1	-54.56	1.05667e-06	1.57395e-06	53.8461538461538|56.7567567567568|53.0864197530864	0|0|0	Chr2_15165601_15166194_R_AT2G36120.1_1
Chr5:10301724-10304414	AT5G28320	Chr5:10302573-10302637	IR	3	3	-	ONT.15977.1	-54.76	0.00047871	0.0021735	53.8461538461538|46.1538461538462|64.2857142857143	0|0|0	Chr5_10302573_10302637_R_ONT.15977.1_1
Chr5:10301724-10304414	AT5G28320	Chr5:10302353-10302459	IR	3	3	-	ONT.15977.1	-54.76	0.00047871	0.0021735	53.8461538461538|46.1538461538462|64.2857142857143	0|0|0	Chr5_10302353_10302459_R_ONT.15977.1_1
Chr5:10301724-10304414	AT5G28320	Chr5:10302198-10302279	IR	3	3	-	ONT.15977.1	-54.76	0.00047871	0.0021735	53.8461538461538|46.1538461538462|64.2857142857143	0|0|0	Chr5_10302198_10302279_R_ONT.15977.1_1
Chr5:10301724-10304414	AT5G28320	Chr5:10302019-10302127	IR	3	3	-	ONT.15977.1	-54.76	0.00047871	0.0021735	53.8461538461538|46.1538461538462|64.2857142857143	0|0|0	Chr5_10302019_10302127_R_ONT.15977.1_1
Chr2:13863724-13864600	AT2G32690	Chr2:13864011-13864253	IR	3	3	-	Ex.ONT.7457.20	-54.9	3.80959e-06	5.57215e-06	55.9322033898305|51.8518518518518|56.9230769230769	0|0|0	Chr2_13864011_13864253_R_Ex.ONT.7457.20_1
Chr2:18866061-18866503	AT2G45830	Chr2:18866229-18866313	IR (overlapping region)	3	3	-	AT2G45830.1	-55.27	8.87959e-05	0.000141854	54.0540540540541|50|61.7647058823529	0|0|0	Chr2_18866229_18866313_R_AT2G45830.1_1
Chr2:13863724-13864600	AT2G32690	Chr2:13864026-13864265	IR	3	3	-	Ex.ONT.7457.17	-55.7	0.000290892	0.00042533	46.4788732394366|58.7301587301587|61.9047619047619	0|0|0	Chr2_13864026_13864265_R_Ex.ONT.7457.17_1
Chr2:13863724-13864597	AT2G32690	Chr2:13864026-13864217	IR	3	3	-	Ex.ONT.7457.11	-56.3	0.000333037	0.000486915	46.4788732394366|61.7647058823529|60.655737704918	0|0|0	Chr2_13864026_13864217_R_Ex.ONT.7457.11_1
Chr1:5295773-5296824	AT1G15400	Chr1:5296047-5296405	IR	3	3	-	Ex.AT1G15400.3	-56.35	6.29577e-05	8.07679e-05	50.4065040650407|61.4906832298137|57.1428571428571	0|0|0	Chr1_5296047_5296405_R_Ex.AT1G15400.3_1
Chr2:13863724-13864597	AT2G32690	Chr2:13864011-13864289	IR	3	3	-	Ex.ONT.7457.12	-56.39	0.000151403	0.000221434	58.1818181818182|48.6842105263158|62.2950819672131	0|0|0	Chr2_13864011_13864289_R_Ex.ONT.7457.12_1
Chr2:15165437-15166465	AT2G36120	Chr2:15165604-15166086	IR	3	3	-	AT2G36120.1	-56.57	7.62331e-05	0.00011341	50|61.3636363636364|58.3333333333333	0|0|0	Chr2_15165604_15166086_R_AT2G36120.1_1
Chr2:13863727-13864597	AT2G32690	Chr2:13864011-13864271	IR	3	3	-	Ex.ONT.7457.25	-56.83	9.55122e-05	0.000139697	58.1818181818182|50|62.2950819672131	0|0|0	Chr2_13864011_13864271_R_Ex.ONT.7457.25_1
Chr1:29331355-29333092	ONT.4996	Chr1:29332622-29332733	IR (overlapping region)	3	3	-	ONT.4996.1	-56.99	4.75516e-05	5.76858e-05	51.7857142857143|56.8720379146919|62.3076923076923	0|0|0	Chr1_29332622_29332733_R_ONT.4996.1_1
Chr3:19053440-19053995	ONT.9549	Chr3:19053862-19053969	IR (overlapping region)	3	3	-	ONT.9549.1	-57.65	2.40614e-05	4.5627e-05	62.2516556291391|57.4193548387097|53.2934131736527	0|0|0	Chr3_19053862_19053969_R_ONT.9549.1_1
Chr1:29450750-29452476	ONT.2491	Chr1:29451644-29451706	IR (overlapping region)	3	3	-	ONT.2491.1	-57.88	2.45611e-06	2.98335e-06	58.8235294117647|55|59.8039215686275	0|0|0	Chr1_29451644_29451706_R_ONT.2491.1_1
Chr3:19053440-19053995	ONT.9549	Chr3:19053713-19053789	IR (overlapping region)	3	3	-	ONT.9549.1	-58.09	2.25184e-05	4.27031e-05	62.5|58.1699346405229|53.6144578313253	0|0|0	Chr3_19053713_19053789_R_ONT.9549.1_1
Chr2:15165437-15166465	AT2G36120	Chr2:15165601-15166083	IR	3	3	-	AT2G36120.1	-58.5	7.8911e-05	0.00011739	51.5151515151515|63.0434782608696|60.9375	0|0|0	Chr2_15165601_15166083_R_AT2G36120.1_1
Chr5:25383906-25387224	AT5G63370	Chr5:25385078-25385155	IR	3	3	-	AT5G63370.1	-58.86	2.40679e-06	2.26126e-05	61.1764705882353|59.3023255813954|56.0975609756098	0|0|0	Chr5_25385078_25385155_R_AT5G63370.1_1
Chr5:25383906-25387224	AT5G63370	Chr5:25385078-25385150	IR	3	3	-	AT5G63370.1	-58.86	2.40679e-06	2.26126e-05	61.1764705882353|59.3023255813954|56.0975609756098	0|0|0	Chr5_25385078_25385150_R_AT5G63370.1_1
Chr1:24357869-24358542	AT1G65500	Chr1:24357891-24357961	IR	3	3	-	ONT.1974.2	-60.8	9.30895e-05	0.000106107	53.5714285714286|66.6666666666667|62.1621621621622	0|0|0	Chr1_24357891_24357961_R_ONT.1974.2_1
Chr2:13863730-13864600	AT2G32690	Chr2:13864026-13864181	IR	3	3	-	Ex.ONT.7457.44	-60.81	0.000289681	0.000423575	50.6493506493506|67.0886075949367|64.7058823529412	0|0|0	Chr2_13864026_13864181_R_Ex.ONT.7457.44_1
Chr1:5295827-5296882	AT1G15400	Chr1:5296052-5296405	IR	3	3	-	Ex.AT1G15400.1	-60.83	7.28123e-06	9.34133e-06	57.0422535211268|63.953488372093|61.4973262032086	0|0|0	Chr1_5296052_5296405_R_Ex.AT1G15400.1_1
Chr5:13414751-13415073	AT5G35160	Chr5:13414784-13414942	IR	3	3	-	Ex.AT5G35160.1	-61.03	0.000358127	0.00168923	60.1769911504425|52.0661157024793|70.8333333333333	0|0|0	Chr5_13414784_13414942_R_Ex.AT5G35160.1_1
Chr2:8969417-8970630	AT2G20830	Chr2:8969812-8970090	IR	3	3	-	AT2G20830.1	-61.19	2.03777e-07	3.5083e-07	60.7843137254902|62.7906976744186|60	0|0|0	Chr2_8969812_8970090_R_AT2G20830.1_1
Chr2:15165437-15166465	AT2G36120	Chr2:15165707-15166181	IR	3	3	-	AT2G36120.1	-61.66	0.00182526	0.00271244	45.4545454545455|73.5294117647059|66	0|0|0	Chr2_15165707_15166181_R_AT2G36120.1_1
Chr2:15165437-15166465	AT2G36120	Chr2:15165798-15166187	IR	3	3	-	AT2G36120.1	-61.89	0.000150066	0.000223102	56.25|58.8235294117647|70.5882352941177	0|0|0	Chr2_15165798_15166187_R_AT2G36120.1_1
Chr2:15165437-15166465	AT2G36120	Chr2:15165658-15166173	IR	3	3	-	AT2G36120.1	-62.59	6.00271e-05	8.9308e-05	63.8297872340426|68|55.9322033898305	0|0|0	Chr2_15165658_15166173_R_AT2G36120.1_1
ChrM:25482-28733	ATMG00090	ChrM:27078-28658	IR	3	3	-	Ex.ATMG00090.1	-62.79	1.78795e-05	0.170293	57.5757575757576|65|65.7894736842105	0|0|0	ChrM_27078_28658_R_Ex.ATMG00090.1_1
ChrM:25223-28730	ATMG00090	ChrM:27079-28659	IR	3	3	-	Ex.ONT.19562.2	-62.79	1.78795e-05	0.170293	57.5757575757576|65|65.7894736842105	0|0|0	ChrM_27079_28659_R_Ex.ONT.19562.2_1
Chr5:25383906-25387224	AT5G63370	Chr5:25385078-25387099	IR	3	3	-	AT5G63370.1	-63.29	8.3023e-07	7.80412e-06	61.6822429906542|65.6862745098039|62.5	0|0|0	Chr5_25385078_25387099_R_AT5G63370.1_1
Chr5:4733799-4734723	AT5G14690	Chr5:4734531-4734648	IR (overlapping region)	3	3	-	Ex.ONT.17763.2	-64.77	7.05997e-05	0.00125805	68.4210526315789|68.75|57.1428571428571	0|0|0	Chr5_4734531_4734648_R_Ex.ONT.17763.2_1
Chr1:11453714-11455181	ONT.1197	Chr1:11454487-11454571	IR (overlapping region)	3	3	-	ONT.1197.4	-65.23	2.12608e-06	2.18675e-06	62.6373626373626|68.1318681318681|64.9350649350649	0|0|0	Chr1_11454487_11454571_R_ONT.1197.4_1
Chr2:15165437-15166465	AT2G36120	Chr2:15165671-15166181	IR	3	3	-	AT2G36120.1	-65.5	1.7109e-06	2.54816e-06	62.5|67.3469387755102|66.6666666666667	0|0|0	Chr2_15165671_15166181_R_AT2G36120.1_1
Chr2:15165437-15166465	AT2G36120	Chr2:15165658-15166209	IR	3	3	-	AT2G36120.1	-65.66	3.45585e-07	5.14843e-07	63.8297872340426|67.3469387755102|65.7894736842105	0|0|0	Chr2_15165658_15166209_R_AT2G36120.1_1
Chr2:15165437-15166465	AT2G36120	Chr2:15165604-15166176	IR	3	3	-	AT2G36120.1	-65.68	0.000121517	0.000180686	68.9655172413793|71.1864406779661|56.8965517241379	0|0|0	Chr2_15165604_15166176_R_AT2G36120.1_1
Chr2:15165437-15166465	AT2G36120	Chr2:15165601-15166176	IR	3	3	-	AT2G36120.1	-65.68	0.000121517	0.000180686	68.9655172413793|71.1864406779661|56.8965517241379	0|0|0	Chr2_15165601_15166176_R_AT2G36120.1_1
Chr2:8969417-8970630	AT2G20830	Chr2:8969812-8970600	IR	3	3	-	AT2G20830.1	-65.83	3.70129e-06	6.37169e-06	63.963963963964|69.5238095238095|64	0|0|0	Chr2_8969812_8970600_R_AT2G20830.1_1
Chr2:15165437-15166465	AT2G36120	Chr2:15165604-15166181	IR	3	3	-	AT2G36120.1	-65.93	9.61135e-05	0.000142942	68.9655172413793|71.1864406779661|57.6271186440678	0|0|0	Chr2_15165604_15166181_R_AT2G36120.1_1
Chr2:8969417-8970630	AT2G20830	Chr2:8970431-8970600	IR	3	3	-	AT2G20830.1	-66.56	2.94942e-05	5.0769e-05	63.963963963964|72.8155339805825|62.8865979381443	0|0|0	Chr2_8970431_8970600_R_AT2G20830.1_1
Chr5:2330399-2332281	AT5G07370	Chr5:2330845-2330956	IR	3	3	-	AT5G07370.4	-67.01	4.63175e-07	3.57063e-06	65.7142857142857|66.0714285714286|69.2307692307692	0|0|0	Chr5_2330845_2330956_R_AT5G07370.4_1
Chr2:19318410-19319212	ONT.8063	Chr2:19319043-19319129	IR (overlapping region)	3	3	-	ONT.8063.1	-67.03	0.000323225	0.00052007	57.1428571428571|66.6666666666667|77.2727272727273	0|0|0	Chr2_19319043_19319129_R_ONT.8063.1_1
Chr5:19240431-19241221	AT5G47430	Chr5:19240610-19240801	IR	3	3	-	Ex.AT5G47430.1	-67.13	2.18391e-07	1.28221e-06	66|66.412213740458|68.9655172413793	0|0|0	Chr5_19240610_19240801_R_Ex.AT5G47430.1_1
Chr5:24553898-24556749	AT5G61010	Chr5:24554052-24554155	IR	3	3	-	AT5G61010.1	-67.94	0.000142495	0.00123945	75|58.8235294117647|70	0|0|0	Chr5_24554052_24554155_R_AT5G61010.1_1
Chr3:7916489-7919484	AT3G22380	Chr3:7918872-7918944	IR	3	3	-	AT3G22380.1	-68.02	0.000131157	0.000334101	60.655737704918|76.7241379310345|66.6666666666667	0|0|0	Chr3_7918872_7918944_R_AT3G22380.1_1
Chr2:15165437-15166465	AT2G36120	Chr2:15165667-15166113	IR	3	3	-	AT2G36120.1	-68.11	1.61749e-06	2.40913e-06	65.625|67.741935483871|70.9677419354839	0|0|0	Chr2_15165667_15166113_R_AT2G36120.1_1
Chr2:19111992-19113450	AT2G46550	Chr2:19113170-19113258	IR	3	3	-	ONT.8045.2	-68.17	5.83468e-05	9.38882e-05	61.7647058823529|67.741935483871|75	0|0|0	Chr2_19113170_19113258_R_ONT.8045.2_1
Chr2:15165437-15166465	AT2G36120	Chr2:15165667-15166182	IR	3	3	-	AT2G36120.1	-68.64	8.42707e-05	0.000125343	62.5|76.7441860465116|66.6666666666667	0|0|0	Chr2_15165667_15166182_R_AT2G36120.1_1
Chr2:15165437-15166465	AT2G36120	Chr2:15165666-15166181	IR	3	3	-	AT2G36120.1	-68.64	8.42707e-05	0.000125343	62.5|76.7441860465116|66.6666666666667	0|0|0	Chr2_15165666_15166181_R_AT2G36120.1_1
Chr2:15165437-15166465	AT2G36120	Chr2:15165682-15166181	IR	3	3	-	AT2G36120.1	-68.7	0.000191118	0.000284123	60.8695652173913|78.5714285714286|66.6666666666667	0|0|0	Chr2_15165682_15166181_R_AT2G36120.1_1
Chr2:15165437-15166465	AT2G36120	Chr2:15165646-15166181	IR	3	3	-	AT2G36120.1	-69.07	8.14313e-05	0.000121129	63.265306122449|77.2727272727273|66.6666666666667	0|0|0	Chr2_15165646_15166181_R_AT2G36120.1_1
Chr5:25383906-25387224	AT5G63370	Chr5:25386786-25387099	IR	3	3	-	AT5G63370.1	-69.4	1.87997e-05	0.000176542	66.9354838709677|75.2380952380952|66.0377358490566	0|0|0	Chr5_25386786_25387099_R_AT5G63370.1_1
Chr5:25383906-25387224	AT5G63370	Chr5:25386783-25387099	IR	3	3	-	AT5G63370.1	-69.4	1.87997e-05	0.000176542	66.9354838709677|75.2380952380952|66.0377358490566	0|0|0	Chr5_25386783_25387099_R_AT5G63370.1_1
Chr4:12332641-12333711	AT4G23670	Chr4:12333126-12333480	IR	3	3	-	ONT.14246.2	-69.87	2.33748e-06	6.63539e-06	71.7948717948718|71.4285714285714|66.3793103448276	0|0|0	Chr4_12333126_12333480_R_ONT.14246.2_1
ChrM:40502-42628	ATMG00160	ChrM:40586-41929	IR	3	3	-	Ex.ATMG00160.1	-70.02	3.64207e-05	0.198222	73.6842105263158|63.0434782608696|73.3333333333333	0|0|0	ChrM_40586_41929_R_Ex.ATMG00160.1_1
ChrM:40313-42782	ATMG00160	ChrM:40585-41928	IR	3	3	-	Ex.ONT.19566.2	-70.02	3.64207e-05	0.198222	73.6842105263158|63.0434782608696|73.3333333333333	0|0|0	ChrM_40585_41928_R_Ex.ONT.19566.2_1
Chr3:680944-681999	AT3G03020	Chr3:681292-681568	IR	3	3	-	Ex.AT3G03020.1	-70.69	3.42014e-06	8.46328e-06	74.5762711864407|68.6567164179104|68.8311688311688	0|0|0	Chr3_681292_681568_R_Ex.AT3G03020.1_1
Chr3:680944-681974	AT3G03020	Chr3:681292-681648	IR	3	3	-	Ex.AT3G03020.2	-70.69	3.42014e-06	8.46328e-06	74.5762711864407|68.6567164179104|68.8311688311688	0|0|0	Chr3_681292_681648_R_Ex.AT3G03020.2_1
Chr2:15165437-15166465	AT2G36120	Chr2:15165676-15166146	IR	3	3	-	AT2G36120.1	-71.14	3.24096e-05	4.8234e-05	71.0526315789474|65.2173913043478|77.1428571428572	0|0|0	Chr2_15165676_15166146_R_AT2G36120.1_1
ChrM:163625-167642	ATMG00580	ChrM:164140-167220	IR (overlapping region)	3	3	-	Ex.ATMG00580.1	-71.48	0.000130166	0.551006	67.5675675675676|81.25|65.625	0|0|0	ChrM_164140_167220_R_Ex.ATMG00580.1_1
Chr5:16665330-16667171	AT5G41670	Chr5:16665544-16665619	IR	3	3	-	AT5G41670.2	-72.11	1.27078e-07	6.60313e-07	71.5846994535519|73.8095238095238|70.935960591133	0|0|0	Chr5_16665544_16665619_R_AT5G41670.2_1
Chr2:17194751-17195098	AT2G41230	Chr2:17194897-17194987	IR	3	3	-	Ex.ONT.7823.3	-72.88	2.7246e-05	4.20984e-05	70.6521739130435|79.5180722891566|68.4782608695652	0|0|0	Chr2_17194897_17194987_R_Ex.ONT.7823.3_1
Chr2:15165437-15166465	AT2G36120	Chr2:15165613-15166092	IR	3	3	-	AT2G36120.1	-72.98	0.000130344	0.000193805	62.962962962963|77.4193548387097|78.5714285714286	0|0|0	Chr2_15165613_15166092_R_AT2G36120.1_1
Chr2:15165437-15166465	AT2G36120	Chr2:15165667-15166146	IR	3	3	-	AT2G36120.1	-73.68	6.08803e-07	9.06872e-07	71.0526315789474|75|75	0|0|0	Chr2_15165667_15166146_R_AT2G36120.1_1
ChrC:81189-82652	ATCG00790	ChrC:81588-82643	IR	3	3	-	Ex.ATCG00790.1	-75.53	7.88201e-09	0.000300289	75.6035578144854|76.2765957446808|74.7066492829205	0|0|0	ChrC_81588_82643_R_Ex.ATCG00790.1_1
Chr2:15165437-15166465	AT2G36120	Chr2:15165694-15166146	IR	3	3	-	AT2G36120.1	-75.71	9.55482e-05	0.000142106	67.741935483871|75|84.375	0|0|0	Chr2_15165694_15166146_R_AT2G36120.1_1
Chr2:15165437-15166465	AT2G36120	Chr2:15165646-15166173	IR	3	3	-	AT2G36120.1	-76.04	5.99589e-07	8.93182e-07	77.5|77.2727272727273|73.3333333333333	0|0|0	Chr2_15165646_15166173_R_AT2G36120.1_1
Chr2:15165437-15166465	AT2G36120	Chr2:15165646-15166172	IR	3	3	-	AT2G36120.1	-76.04	5.99589e-07	8.93182e-07	77.5|77.2727272727273|73.3333333333333	0|0|0	Chr2_15165646_15166172_R_AT2G36120.1_1
ChrM:167221-169674	ATMG00580	ChrM:167643-169584	IR (overlapping region)	3	3	-	Ex.ATMG00580.1	-76.51	7.85033e-05	0.373853	68.2926829268293|84.3137254901961|76.9230769230769	0|0|0	ChrM_167643_169584_R_Ex.ATMG00580.1_1
Chr2:9079008-9079622	ONT.7018	Chr2:9079226-9079352	IR	3	3	-	ONT.7018.2	-76.55	6.73479e-06	1.15933e-05	80|77.9411764705882|71.6981132075472	0|0|0	Chr2_9079226_9079352_R_ONT.7018.2_1
Chr4:9715774-9716525	AT4G17410	Chr4:9716190-9716349	IR	3	3	-	AT4G17410.1	-76.83	8.36596e-07	3.71476e-06	78.7878787878788|77.7777777777778|73.9130434782609	0|0|0	Chr4_9716190_9716349_R_AT4G17410.1_1
Chr4:7783818-7785326	AT4G13390	Chr4:7784210-7784287	IR	3	3	-	AT4G13390.1	-77.34	3.55686e-05	0.000146481	85|73.3333333333333|73.6842105263158	0|0|0	Chr4_7784210_7784287_R_AT4G13390.1_1
Chr2:15165437-15166465	AT2G36120	Chr2:15165685-15166146	IR	3	3	-	AT2G36120.1	-77.45	2.50227e-05	3.7249e-05	72.972972972973|75|84.375	0|0|0	Chr2_15165685_15166146_R_AT2G36120.1_1
Chr5:3377678-3378407	AT5G10700	Chr5:3378102-3378228	IR (overlapping region)	3	3	-	ONT.17597.1	-77.61	1.25959e-06	1.6738e-05	74.4855967078189|78.1954887218045|80.1556420233463	0|0|0	Chr5_3378102_3378228_R_ONT.17597.1_1
Chr2:15165437-15166465	AT2G36120	Chr2:15165636-15166143	IR	3	3	-	AT2G36120.1	-78.03	8.06636e-05	0.000119992	77.1428571428572|70.2702702702703|86.6666666666667	0|0|0	Chr2_15165636_15166143_R_AT2G36120.1_1
Chr2:15165437-15166465	AT2G36120	Chr2:15165667-15166216	IR	3	3	-	AT2G36120.1	-78.04	1.7889e-05	2.66371e-05	73.1707317073171|76.7441860465116|84.2105263157895	0|0|0	Chr2_15165667_15166216_R_AT2G36120.1_1
Chr1:28896371-28896883	AT1G76930	Chr1:28896558-28896605	IR	3	3	-	AT1G76930.1	-79.9	3.04035e-07	3.66752e-07	81.4814814814815|77.5510204081633|80.6818181818182	0|0|0	Chr1_28896558_28896605_R_AT1G76930.1_1
Chr1:28896371-28896883	AT1G76930	Chr1:28896485-28896605	IR	3	3	-	AT1G76930.1	-79.98	2.34748e-07	2.83181e-07	81.4814814814815|77.7777777777778|80.6818181818182	0|0|0	Chr1_28896485_28896605_R_AT1G76930.1_1
Chr1:28896371-28896883	AT1G76930	Chr1:28896437-28896605	IR	3	3	-	AT1G76930.1	-79.98	2.34748e-07	2.83181e-07	81.4814814814815|77.7777777777778|80.6818181818182	0|0|0	Chr1_28896437_28896605_R_AT1G76930.1_1
Chr1:28896371-28896883	AT1G76930	Chr1:28896389-28896605	IR	3	3	-	AT1G76930.1	-80.05	1.79288e-07	2.16292e-07	81.4814814814815|78|80.6818181818182	0|0|0	Chr1_28896389_28896605_R_AT1G76930.1_1
Chr5:9206422-9207532	AT5G26270	Chr5:9207009-9207095	IR	3	3	-	ONT.15906.2	-80.13	4.96861e-05	0.00683372	88.7096774193548|76.6666666666667|75	0|0|0	Chr5_9207009_9207095_R_ONT.15906.2_1
Chr5:9206422-9207532	AT5G26270	Chr5:9206962-9207095	IR	3	3	-	ONT.15906.2	-80.13	4.96861e-05	0.00683372	88.7096774193548|76.6666666666667|75	0|0|0	Chr5_9206962_9207095_R_ONT.15906.2_1
Chr3:21797058-21798303	AT3G58990	Chr3:21797095-21797236	IR (overlapping region)	3	3	-	AT3G58990.1	-80.47	3.88808e-05	8.07326e-05	85.0746268656716|84|72.3404255319149	0|0|0	Chr3_21797095_21797236_R_AT3G58990.1_1
Chr1:8860677-8861381	AT1G25275	Chr1:8860868-8861090	IR	3	3	-	ONT.974.2	-80.52	2.76352e-06	3.76864e-06	83.9195979899498|80.9523809523809|76.6839378238342	0|0|0	Chr1_8860868_8861090_R_ONT.974.2_1
Chr5:13414945-13417265	AT5G35160	Chr5:13415074-13415157	IR	3	3	-	AT5G35160.2	-80.86	1.24125e-07	5.85551e-07	79.5698924731183|80.2469135802469|82.7586206896552	0|0|0	Chr5_13415074_13415157_R_AT5G35160.2_1
Chr2:9076593-9077532	ONT.5557	Chr2:9076875-9077235	IR (overlapping region)	3	3	-	ONT.5557.2	-80.93	0.000753609	0.00130197	91.6666666666667|63.6363636363636|87.5	0|0|0	Chr2_9076875_9077235_R_ONT.5557.2_1
Chr4:7004335-7006081	AT4G11570	Chr4:7004413-7004685	IR	3	3	-	AT4G11570.2	-81.12	7.04443e-07	2.82474e-06	84.0909090909091|79.2592592592593|80	0|0|0	Chr4_7004413_7004685_R_AT4G11570.2_1
Chr4:7004335-7006081	AT4G11570	Chr4:7004413-7004656	IR	3	3	-	AT4G11570.2	-81.12	7.04443e-07	2.82474e-06	84.0909090909091|79.2592592592593|80	0|0|0	Chr4_7004413_7004656_R_AT4G11570.2_1
Chr2:15165437-15166465	AT2G36120	Chr2:15165526-15166169	IR	3	3	-	AT2G36120.1	-82.3	4.16173e-06	6.19762e-06	77.5510204081633|84.4444444444444|84.9056603773585	0|0|0	Chr2_15165526_15166169_R_AT2G36120.1_1
Chr2:15165437-15166465	AT2G36120	Chr2:15165612-15166187	IR	3	3	-	AT2G36120.1	-82.32	1.17867e-06	1.75562e-06	80|85.7142857142857|81.25	0|0|0	Chr2_15165612_15166187_R_AT2G36120.1_1
Chr3:7140440-7141228	AT3G20470	Chr3:7140700-7140860	IR	3	3	-	AT3G20470.1	-83.97	1.17277e-06	2.93755e-06	82.1428571428571|82.258064516129|87.5	0|0|0	Chr3_7140700_7140860_R_AT3G20470.1_1
Chr3:7140440-7141228	AT3G20470	Chr3:7140699-7140860	IR	3	3	-	AT3G20470.1	-83.97	1.17277e-06	2.93755e-06	82.1428571428571|82.258064516129|87.5	0|0|0	Chr3_7140699_7140860_R_AT3G20470.1_1
Chr3:7140440-7141228	AT3G20470	Chr3:7140698-7140860	IR	3	3	-	AT3G20470.1	-83.97	1.17277e-06	2.93755e-06	82.1428571428571|82.258064516129|87.5	0|0|0	Chr3_7140698_7140860_R_AT3G20470.1_1
Chr2:17194758-17195680	AT2G41230	Chr2:17194897-17195230	IR	3	3	-	Ex.ONT.7823.4	-84.05	4.88004e-06	7.54055e-06	81.6326530612245|89.1025641025641|81.4102564102564	0|0|0	Chr2_17194897_17195230_R_Ex.ONT.7823.4_1
Chr1:28895831-28895988	AT1G76930	Chr1:28895893-28895938	IR	3	3	-	AT1G76930.1	-85.66	1.10847e-06	1.337e-06	82.7586206896552|88.8888888888889|85.3333333333333	0|0|0	Chr1_28895893_28895938_R_AT1G76930.1_1
Chr3:7140440-7141228	AT3G20470	Chr3:7140738-7140869	IR	3	3	-	AT3G20470.1	-85.81	1.28495e-07	3.21939e-07	87.7551020408163|84.2105263157895|85.4545454545455	0|0|0	Chr3_7140738_7140869_R_AT3G20470.1_1
Chr3:7140440-7141228	AT3G20470	Chr3:7140708-7140869	IR	3	3	-	AT3G20470.1	-86.14	1.61898e-07	4.05603e-07	88.2352941176471|84.4827586206897|85.7142857142857	0|0|0	Chr3_7140708_7140869_R_AT3G20470.1_1
Chr3:2889489-2890228	AT3G09390	Chr3:2889767-2890150	IR	3	3	-	ONT.10378.2	-86.25	8.82864e-08	1.94211e-07	86.0544217687075|87.987012987013|84.7133757961784	0|0|0	Chr3_2889767_2890150_R_ONT.10378.2_1
Chr1:10909150-10909784	AT1G30757	Chr1:10909152-10909262	IR	3	3	-	AT1G30757.1	-86.26	4.02114e-05	4.12209e-05	91.4893617021277|89.7959183673469|77.5	0|0|0	Chr1_10909152_10909262_R_AT1G30757.1_1
Chr3:7140440-7141228	AT3G20470	Chr3:7140692-7140869	IR	3	3	-	AT3G20470.1	-86.48	1.21283e-07	3.03889e-07	88.4615384615385|85|85.9649122807018	0|0|0	Chr3_7140692_7140869_R_AT3G20470.1_1
Chr3:2889489-2890228	AT3G09390	Chr3:2889761-2890144	IR	3	3	-	ONT.10378.2	-86.66	1.11872e-08	2.46108e-08	85.8974358974359|86.3095238095238|87.7742946708464	0|0|0	Chr3_2889761_2890144_R_ONT.10378.2_1
Chr4:2375511-2376360	ONT.13610	Chr4:2375979-2376114	IR	3	3	-	ONT.13610.2	-86.91	4.75559e-08	1.778e-07	87.5757575757576|87.8706199460916|85.2760736196319	0|0|0	Chr4_2375979_2376114_R_ONT.13610.2_1
Chr3:1848880-1849336	ONT.8320	Chr3:1849037-1849140	IR	3	3	-	Ex.ONT.8320.2	-87.19	2.5906e-06	4.87631e-06	88.3561643835616|90.3508771929825|82.8671328671329	0|0|0	Chr3_1849037_1849140_R_Ex.ONT.8320.2_1
Chr4:2375511-2376360	ONT.13610	Chr4:2376019-2376114	IR	3	3	-	ONT.13610.2	-87.26	5.0643e-09	1.89361e-08	87.5757575757576|87.8706199460916|86.3354037267081	0|0|0	Chr4_2376019_2376114_R_ONT.13610.2_1
Chr3:9665565-9666348	ONT.9151	Chr3:9665720-9665951	IR	3	3	-	ONT.9151.2	-87.99	1.63154e-06	4.29894e-06	91.7525773195876|84.8739495798319|87.3563218390805	0|0|0	Chr3_9665720_9665951_R_ONT.9151.2_1
Chr2:17194761-17195683	AT2G41230	Chr2:17194897-17195334	IR	3	3	-	Ex.ONT.7823.5	-88.3	1.7604e-06	2.72026e-06	86.2244897959184|92.4107142857143|86.2559241706161	0|0|0	Chr2_17194897_17195334_R_Ex.ONT.7823.5_1
Chr2:8695370-8697094	AT2G20142	Chr2:8695536-8695719	IR	3	3	-	ONT.5516.3	-90.85	4.53968e-06	7.75713e-06	88.8888888888889|87.5|96.1538461538462	0|0|0	Chr2_8695536_8695719_R_ONT.5516.3_1
Chr5:18423816-18425009	AT5G45470	Chr5:18424030-18424130	IR	3	3	-	ONT.18611.2	-91.03	6.50464e-06	3.64807e-05	96.7741935483871|89.247311827957|87.0588235294118	0|0|0	Chr5_18424030_18424130_R_ONT.18611.2_1
Chr5:18423816-18425009	AT5G45470	Chr5:18424685-18424993	IR	3	3	-	ONT.18611.2	-91.17	6.14228e-06	3.44535e-05	96.9072164948454|89.1089108910891|87.5	0|0|0	Chr5_18424685_18424993_R_ONT.18611.2_1
Chr3:7140440-7141228	AT3G20470	Chr3:7140673-7140869	IR	3	3	-	AT3G20470.1	-91.33	1.00763e-07	2.52491e-07	93.4065934065934|90.2173913043478|90.3614457831325	0|0|0	Chr3_7140673_7140869_R_AT3G20470.1_1
Chr3:7140440-7141228	AT3G20470	Chr3:7140672-7140869	IR	3	3	-	AT3G20470.1	-91.33	1.00763e-07	2.52491e-07	93.4065934065934|90.2173913043478|90.3614457831325	0|0|0	Chr3_7140672_7140869_R_AT3G20470.1_1
Chr3:7140440-7141228	AT3G20470	Chr3:7140671-7140868	IR	3	3	-	AT3G20470.1	-91.33	1.00763e-07	2.52491e-07	93.4065934065934|90.2173913043478|90.3614457831325	0|0|0	Chr3_7140671_7140868_R_AT3G20470.1_1
Chr2:9036793-9037650	AT2G21060	Chr2:9037063-9037317	IR	3	3	-	AT2G21060.1	-92.29	1.1008e-08	1.8999e-08	91.2408759124088|93.3333333333333|92.3076923076923	0|0|0	Chr2_9037063_9037317_R_AT2G21060.1_1
Chr1:28896371-28896883	AT1G76930	Chr1:28896410-28896506	IR	3	3	-	AT1G76930.1	-92.65	4.3713e-07	5.27269e-07	92.9577464788732|95.1219512195122|89.873417721519	0|0|0	Chr1_28896410_28896506_R_AT1G76930.1_1
Chr1:28896371-28896883	AT1G76930	Chr1:28896410-28896458	IR	3	3	-	AT1G76930.1	-92.65	4.3713e-07	5.27269e-07	92.9577464788732|95.1219512195122|89.873417721519	0|0|0	Chr1_28896410_28896458_R_AT1G76930.1_1
Chr3:17157944-17158381	AT3G46600	Chr3:17158210-17158301	IR	3	3	-	AT3G46600.2	-92.95	3.63969e-09	6.71305e-09	93.8628158844765|92.6174496644295|92.3728813559322	0|0|0	Chr3_17158210_17158301_R_AT3G46600.2_1
Chr3:17157944-17158381	AT3G46600	Chr3:17158210-17158297	IR	3	3	-	AT3G46600.2	-92.95	3.63969e-09	6.71305e-09	93.8628158844765|92.6174496644295|92.3728813559322	0|0|0	Chr3_17158210_17158297_R_AT3G46600.2_1
Chr2:9036793-9037650	AT2G21060	Chr2:9037063-9037570	IR	3	3	-	AT2G21060.1	-94.25	2.12335e-08	3.66457e-08	95.5974842767296|94.0476190476191|93.1034482758621	0|0|0	Chr2_9037063_9037570_R_AT2G21060.1_1
Chr2:9036793-9037650	AT2G21060	Chr2:9037195-9037317	IR	3	3	-	AT2G21060.1	-94.56	7.27071e-08	1.25475e-07	92.5925925925926|95.7575757575758|95.3367875647668	0|0|0	Chr2_9037195_9037317_R_AT2G21060.1_1
Chr2:9265280-9266371	AT2G21660	Chr2:9265499-9265739	IR	3	3	-	ONT.7034.8	-94.68	3.35084e-11	5.82472e-11	94.4344703770197|94.9386503067485|94.6808510638298	0|0|0	Chr2_9265499_9265739_R_ONT.7034.8_1
Chr2:9265280-9266371	AT2G21660	Chr2:9265503-9265649	IR	3	3	-	ONT.7034.8	-95.09	6.91837e-10	1.20217e-09	94.6735395189003|95.6973293768546|94.8892674616695	0|0|0	Chr2_9265503_9265649_R_ONT.7034.8_1
Chr2:9265280-9266371	AT2G21660	Chr2:9265613-9265739	IR	3	3	-	ONT.7034.8	-95.22	4.81631e-09	8.36259e-09	95.2772073921971|94.3103448275862|96.0629921259843	0|0|0	Chr2_9265613_9265739_R_ONT.7034.8_1
Chr2:9265280-9266371	AT2G21660	Chr2:9265499-9265583	IR	3	3	-	ONT.7034.8	-95.36	3.25952e-10	5.66469e-10	95.0871632329635|95.8806818181818|95.1219512195122	0|0|0	Chr2_9265499_9265583_R_ONT.7034.8_1
Chr2:9265280-9266371	AT2G21660	Chr2:9265512-9265753	IR	3	3	-	ONT.7034.8	-95.8	8.4677e-11	1.47173e-10	95.5390334572491|95.7074721780604|96.1608775137112	0|0|0	Chr2_9265512_9265753_R_ONT.7034.8_1
Chr2:9265280-9266371	AT2G21660	Chr2:9265512-9265640	IR	3	3	-	ONT.7034.8	-96.05	4.41549e-11	7.67502e-11	95.8115183246073|95.9821428571429|96.3478260869565	0|0|0	Chr2_9265512_9265640_R_ONT.7034.8_1
Chr3:17158302-17159965	AT3G46600	Chr3:17158382-17158440	IR	3	3	-	AT3G46600.3	-96.1	5.76584e-10	1.06356e-09	96.309963099631|95.5017301038062|96.4757709251101	0|0|0	Chr3_17158382_17158440_R_AT3G46600.3_1
Chr5:19623481-19624199	ONT.18721	Chr5:19623990-19624089	IR	3	3	-	Ex.ONT.18721.2	-96.8	1.02066e-09	6.2077e-09	97.4522292993631|96.697247706422|96.2546816479401	0|0|0	Chr5_19623990_19624089_R_Ex.ONT.18721.2_1
Chr5:19623481-19624199	ONT.18721	Chr5:19623976-19624089	IR	3	3	-	Ex.ONT.18721.3	-96.8	1.02066e-09	6.2077e-09	97.4522292993631|96.697247706422|96.2546816479401	0|0|0	Chr5_19623976_19624089_R_Ex.ONT.18721.3_1
Chr3:6825555-6825990	AT3G19660	Chr3:6825661-6825902	IR	3	3	-	Ex.ONT.10823.4	-97.03	3.5097e-08	8.68771e-08	96.0629921259843|96.3157894736842|98.7261146496815	0|0|0	Chr3_6825661_6825902_R_Ex.ONT.10823.4_1
Chr3:6825527-6825990	AT3G19660	Chr3:6825664-6825902	IR	3	3	-	Ex.ONT.10823.3	-97.03	3.5097e-08	8.68771e-08	96.0629921259843|96.3157894736842|98.7261146496815	0|0|0	Chr3_6825664_6825902_R_Ex.ONT.10823.3_1
Chr3:6825525-6825990	AT3G19660	Chr3:6825672-6825902	IR	3	3	-	Ex.ONT.10823.2	-97.03	3.5097e-08	8.68771e-08	96.0629921259843|96.3157894736842|98.7261146496815	0|0|0	Chr3_6825672_6825902_R_Ex.ONT.10823.2_1
Chr2:9265280-9266371	AT2G21660	Chr2:9265491-9265685	IR	3	3	-	ONT.7034.8	-97.87	6.19869e-11	1.07741e-10	97.6827094474153|97.7134146341463|98.2238010657194	0|0|0	Chr2_9265491_9265685_R_ONT.7034.8_1
Chr2:9265280-9266371	AT2G21660	Chr2:9265491-9265559	IR	3	3	-	ONT.7034.8	-98.16	1.587e-11	2.75878e-11	97.9430379746835|98.1664315937941|98.3766233766234	0|0|0	Chr2_9265491_9265559_R_ONT.7034.8_1
Chr2:17194926-17195674	AT2G41230	Chr2:17195099-17195230	IR	3	3	-	AT2G41230.1	-99.11	1.62013e-09	2.5037e-09	98.4162895927602|99.8080614203455|99.1071428571429	0|0|0	Chr2_17195099_17195230_R_AT2G41230.1_1

## Sheet: B v.s D
Event_Region	GeneID	Target_Exon	Event_Type	N	T	Exon_Type	Reference_Transcript	螖PSI(%)	T-test_p-value	FDR(BH)	N_Values	T_Values	DatabaseID
Chr3:4261996-4262447	AT3G13225	Chr3:4262166-4262447	A5SS	3	3	-	ONT.10561.2	28.27	0.00831268	0.0192465	36.8421052631579|33.3333333333333|21.4285714285714	59.0909090909091|64.7058823529412|52.6315789473684	Chr3_4261996_4262447_S_ONT.10561.2_1
Chr3:16505896-16506001	AT3G45100	Chr3:16505991-16506001	A3SS	3	3	-	AT3G45100.1	15.86	0.0039887	0.00735888	71.6417910447761|73.6111111111111|67.1232876712329	89.3333333333333|87.5|83.1168831168831	Chr3_16505896_16506001_S_AT3G45100.1_1
Chr1:7262758-7262873	AT1G20880	Chr1:7262758-7262780	A3SS	3	3	-	AT1G20880.1	13.18	0.00921297	0.0122707	80|78.9473684210526|73.0769230769231	92.3076923076923|86.9565217391304|92.3076923076923	Chr1_7262758_7262873_S_AT1G20880.1_1
Chr3:17577348-17579577	AT3G47680	Chr3:17578462-17578687	IR (overlapping region)	3	3	-	Ex.ONT.11344.7	-10.01	0.00469474	0.00881411	6.49350649350649|11.7647058823529|11.7647058823529	0|0|0	Chr3_17578462_17578687_R_Ex.ONT.11344.7_1
Chr1:18402506-18403126	AT1G49730	Chr1:18402893-18403012	IR	3	3	-	AT1G49730.1	-10.04	0.00474909	0.005088	12.3076923076923|11.2676056338028|6.55737704918033	0|0|0	Chr1_18402893_18403012_R_AT1G49730.1_1
Chr2:15605889-15608454	AT2G37150	Chr2:15605994-15608306	IR	3	3	-	Ex.AT2G37150.1	-10.11	0.00202545	0.003073	12.9032258064516|8.33333333333333|9.09090909090909	0|0|0	Chr2_15605994_15608306_R_Ex.AT2G37150.1_1
Chr4:5828618-5829124	AT4G09150	Chr4:5828939-5829008	IR	3	3	-	ONT.12231.4	-10.13	0.00321693	0.0125345	11.9266055045872|6.93069306930693|11.5384615384615	0|0|0	Chr4_5828939_5829008_R_ONT.12231.4_1
Chr1:9048737-9048848	AT1G26170	Chr1:9048848-9048848	A5SS	3	3	-	Ex.AT1G26170.1	-10.13	0.00910949	0.0124714	62.2222222222222|66.6666666666667|59.4594594594595	52.0833333333333|53.4883720930233|52.3809523809524	Chr1_9048737_9048848_S_Ex.AT1G26170.1_1
Chr3:1754687-1755631	AT3G05870	Chr3:1755053-1755591	IR	3	3	-	Ex.AT3G05870.1	-10.16	0.00224587	0.00421758	8.33333333333333|9.09090909090909|13.0434782608696	0|0|0	Chr3_1755053_1755591_R_Ex.AT3G05870.1_1
Chr3:1754687-1755631	AT3G05870	Chr3:1755026-1755591	IR	3	3	-	Ex.AT3G05870.2	-10.16	0.00224587	0.00421758	8.33333333333333|9.09090909090909|13.0434782608696	0|0|0	Chr3_1755026_1755591_R_Ex.AT3G05870.2_1
Chr2:13864029-13864361	AT2G32690	Chr2:13864029-13864034	A3SS	3	3	-	ONT.7457.33	-10.17	0.00787782	0.0115176	12.5|15.3846153846154|13.6363636363636	4.76190476190476|6.25|0	Chr2_13864029_13864361_S_ONT.7457.33_1
Chr2:13864026-13864361	AT2G32690	Chr2:13864026-13864034	A3SS	3	3	-	ONT.7457.33	-10.17	0.00787782	0.0115176	12.5|15.3846153846154|13.6363636363636	4.76190476190476|6.25|0	Chr2_13864026_13864361_S_ONT.7457.33_1
Chr2:13864005-13864361	AT2G32690	Chr2:13864005-13864034	A3SS	3	3	-	ONT.7457.33	-10.17	0.00787782	0.0115176	12.5|15.3846153846154|13.6363636363636	4.76190476190476|6.25|0	Chr2_13864005_13864361_S_ONT.7457.33_1
Chr2:13863995-13864361	AT2G32690	Chr2:13863995-13864034	A3SS	3	3	-	ONT.7457.33	-10.17	0.00787782	0.0116305	12.5|15.3846153846154|13.6363636363636	4.76190476190476|6.25|0	Chr2_13863995_13864361_S_ONT.7457.33_1
Chr2:10066163-10067734	AT2G23680	Chr2:10066361-10066452	IR	3	3	-	ONT.5655.5	-10.18	0.00108413	0.00150174	12|7.89473684210526|10.6382978723404	0|0|0	Chr2_10066361_10066452_R_ONT.5655.5_1
Chr2:10066163-10067734	AT2G23680	Chr2:10066359-10066452	IR	3	3	-	ONT.5655.5	-10.18	0.00108413	0.00150174	12|7.89473684210526|10.6382978723404	0|0|0	Chr2_10066359_10066452_R_ONT.5655.5_1
Chr5:8794252-8796688	AT5G25350	Chr5:8794404-8794494	IR (overlapping region)	3	3	-	AT5G25350.1	-10.21	0.000918932	0.0758914	12.0240480961924|10.5590062111801|8.05084745762712	0|0|0	Chr5_8794404_8794494_R_AT5G25350.1_1
Chr5:8794252-8796688	AT5G25350	Chr5:8794403-8794496	IR (overlapping region)	3	3	-	AT5G25350.1	-10.21	0.000918932	0.0758914	12.0240480961924|10.5590062111801|8.05084745762712	0|0|0	Chr5_8794403_8794496_R_AT5G25350.1_1
Chr2:7846050-7846872	AT2G18050	Chr2:7846182-7846253	IR	3	3	-	ONT.5437.2	-10.35	7.88551e-07	1.35055e-06	10.7438016528926|10.1763907734057|10.1307189542484	0|0|0	Chr2_7846182_7846253_R_ONT.5437.2_1
Chr5:23195052-23195476	AT5G57240	Chr5:23195332-23195447	IR (overlapping region)	3	3	-	AT5G57240.1	-10.42	0.00121729	0.00938658	12.3711340206186|8.02469135802469|10.8571428571429	0|0|0	Chr5_23195332_23195447_R_AT5G57240.1_1
Chr1:20803704-20804573	AT1G55675	Chr1:20803961-20804302	IR	3	3	-	AT1G55675.1	-10.42	0.000514751	0.000567738	9.02255639097744|9.83606557377049|12.4031007751938	0|0|0	Chr1_20803961_20804302_R_AT1G55675.1_1
Chr4:11657008-11658310	AT4G21990	Chr4:11657598-11657749	IR	3	3	-	AT4G21990.1	-10.43	0.00581135	0.0162896	8.10810810810811|8.88888888888889|14.2857142857143	0|0|0	Chr4_11657598_11657749_R_AT4G21990.1_1
Chr1:27979119-27979487	AT1G74440	Chr1:27979331-27979410	IR	3	3	-	Ex.ONT.4843.3	-10.44	0.000101127	0.00012089	9.09090909090909|11.1111111111111|11.1111111111111	0|0|0	Chr1_27979331_27979410_R_Ex.ONT.4843.3_1
Chr1:27978916-27979487	AT1G74440	Chr1:27979337-27979415	IR	3	3	-	Ex.ONT.4843.1	-10.44	0.000101127	0.00012089	9.09090909090909|11.1111111111111|11.1111111111111	0|0|0	Chr1_27979337_27979415_R_Ex.ONT.4843.1_1
Chr3:7838884-7839467	AT3G22210	Chr3:7839249-7839335	IR	3	3	-	ONT.10921.1	-10.5	1.09244e-05	2.80209e-05	10.8597285067873|9.72568578553616|10.9090909090909	0|0|0	Chr3_7839249_7839335_R_ONT.10921.1_1
Chr1:1477551-1478875	ONT.2770	Chr1:1477792-1478699	IR	3	3	-	Ex.ONT.2770.48	-10.5	0.000272308	0.000286907	9.30232558139535|10|12.1951219512195	0|0|0	Chr1_1477792_1478699_R_Ex.ONT.2770.48_1
Chr1:1477507-1478874	ONT.2770	Chr1:1477792-1478703	IR	3	3	-	Ex.ONT.2770.28	-10.5	0.000272308	0.000286907	9.30232558139535|10|12.1951219512195	0|0|0	Chr1_1477792_1478703_R_Ex.ONT.2770.28_1
Chr1:1477507-1478873	ONT.2770	Chr1:1477796-1478703	IR	3	3	-	Ex.ONT.2770.24	-10.5	0.000272308	0.000286907	9.30232558139535|10|12.1951219512195	0|0|0	Chr1_1477796_1478703_R_Ex.ONT.2770.24_1
Chr1:1477479-1478879	ONT.2770	Chr1:1477790-1478699	IR	3	3	-	Ex.ONT.2770.18	-10.5	0.000272308	0.000286907	9.30232558139535|10|12.1951219512195	0|0|0	Chr1_1477790_1478699_R_Ex.ONT.2770.18_1
Chr2:16712365-16713070	AT2G40020	Chr2:16712510-16712596	IR (overlapping region)	3	3	-	AT2G40020.2	-10.54	0.00416463	0.00644195	14.0625|9.375|8.19672131147541	0|0|0	Chr2_16712510_16712596_R_AT2G40020.2_1
Chr1:4575778-4576621	AT1G13350	Chr1:4575836-4575914	IR	3	3	-	ONT.3106.3	-10.56	0.00199475	0.0025458	8.57142857142857|9.67741935483871|13.4328358208955	0|0|0	Chr1_4575836_4575914_R_ONT.3106.3_1
Chr1:4575769-4576047	AT1G13350	Chr1:4575836-4575961	IR	3	3	-	Ex.ONT.3106.1	-10.56	0.00199475	0.0025458	8.57142857142857|9.67741935483871|13.4328358208955	0|0|0	Chr1_4575836_4575961_R_Ex.ONT.3106.1_1
Chr1:1477476-1478874	ONT.2770	Chr1:1477790-1478739	IR	3	3	-	Ex.ONT.2770.16	-10.63	0.00014488	0.0001527	9.75609756097561|10|12.1212121212121	0|0|0	Chr1_1477790_1478739_R_Ex.ONT.2770.16_1
Chr1:22462385-22462721	AT1G60989	Chr1:22462394-22462719	IR (overlapping region)	3	3	-	AT1G60989.1	-10.69	0.00191601	0.00214838	10.9022556390977|13.134328358209|8.04195804195804	0|0|0	Chr1_22462394_22462719_R_AT1G60989.1_1
Chr1:22462385-22462721	AT1G60989	Chr1:22462391-22462719	IR (overlapping region)	3	3	-	AT1G60989.1	-10.69	0.00191601	0.00214838	10.9022556390977|13.134328358209|8.04195804195804	0|0|0	Chr1_22462391_22462719_R_AT1G60989.1_1
Chr3:19203993-19204089	AT3G51770	Chr3:19203993-19203998	TSS|A3SS	3	3	-	TSS.AT3G51770.2	-10.74	0.00163008	0.00314671	80.7017543859649|79.2452830188679|77.5	70.3703703703704|68.1818181818182|66.6666666666667	Chr3_19203993_19204089_S_TSS.AT3G51770.2_1
Chr5:1639046-1640623	AT5G05550	Chr5:1639358-1639453	IR	3	3	-	ONT.17403.4	-10.75	0.00390659	0.0200743	13.1147540983607|7.2289156626506|11.9047619047619	0|0|0	Chr5_1639358_1639453_R_ONT.17403.4_1
Chr3:17577154-17578778	AT3G47675	Chr3:17577184-17578687	IR	3	3	-	Ex.ONT.11344.1	-10.86	0.00762903	0.0143209	6.49350649350649|13.0434782608696|13.0434782608696	0|0|0	Chr3_17577184_17578687_R_Ex.ONT.11344.1_1
Chr3:17576991-17579580	AT3G47675	Chr3:17577063-17578687	IR	3	3	-	Ex.ONT.11344.2	-10.86	0.00762903	0.0143209	6.49350649350649|13.0434782608696|13.0434782608696	0|0|0	Chr3_17577063_17578687_R_Ex.ONT.11344.2_1
Chr5:19502869-19503651	AT5G48110	Chr5:19503541-19503592	IR	3	3	-	ONT.18710.1	-10.91	0.00824051	0.0496552	6.66666666666667|14.2857142857143|11.7647058823529	0|0|0	Chr5_19503541_19503592_R_ONT.18710.1_1
Chr1:6184904-6185604	AT1G17970	Chr1:6185325-6185482	IR (overlapping region)	3	3	-	AT1G17970.1	-10.92	0.000488498	0.000640119	12.1621621621622|11.7647058823529|8.82352941176471	0|0|0	Chr1_6185325_6185482_R_AT1G17970.1_1
Chr4:10453422-10454451	AT4G19100	Chr4:10453510-10453633	IR (overlapping region)	3	3	-	ONT.12594.4	-10.97	0.000810861	0.00219926	8.57142857142857|11.965811965812|12.3809523809524	0|0|0	Chr4_10453510_10453633_R_ONT.12594.4_1
Chr4:10453415-10454359	AT4G19100	Chr4:10453510-10453771	IR (overlapping region)	3	3	-	Ex.AT4G19100.1	-10.97	0.000810861	0.00219926	8.57142857142857|11.965811965812|12.3809523809524	0|0|0	Chr4_10453510_10453771_R_Ex.AT4G19100.1_1
Chr3:3931580-3933350	AT3G12350	Chr3:3932457-3932666	IR	3	3	-	ONT.8562.3	-10.97	0.000115403	0.000264412	9.63855421686747|11.1111111111111|12.1621621621622	0|0|0	Chr3_3932457_3932666_R_ONT.8562.3_1
Chr4:5636524-5640498	AT4G08850	Chr4:5636983-5640177	IR	3	3	-	Ex.ONT.13673.2	-11.03	0.000131469	0.000508324	11.4832535885167|12.0603015075377|9.54545454545455	0|0|0	Chr4_5636983_5640177_R_Ex.ONT.13673.2_1
Chr3:9513841-9514192	AT3G26020	Chr3:9513944-9514037	IR (overlapping region)	3	3	-	Ex.AT3G26020.2	-11.11	0.000562004	0.00148741	10|13.3333333333333|10	0|0|0	Chr3_9513944_9514037_R_Ex.AT3G26020.2_1
Chr1:2819068-2820020	AT1G08810	Chr1:2819859-2819969	IR (overlapping region)	3	3	-	AT1G08810.2	-11.13	0.00622795	0.00746643	10|15.2173913043478|8.16326530612245	0|0|0	Chr1_2819859_2819969_R_AT1G08810.2_1
Chr5:10293044-10295261	ONT.15976	Chr5:10294254-10294706	IR (overlapping region)	3	3	-	ONT.15976.2	-11.24	4.99318e-05	0.000226856	10.4395604395604|10.8571428571429|12.4324324324324	0|0|0	Chr5_10294254_10294706_R_ONT.15976.2_1
Chr5:4604732-4606282	AT5G14270	Chr5:4604897-4605111	IR	3	3	-	AT5G14270.1	-11.28	7.11037e-08	1.26421e-06	11.5044247787611|11.214953271028|11.1111111111111	0|0|0	Chr5_4604897_4605111_R_AT5G14270.1_1
Chr1:1477529-1478878	ONT.2770	Chr1:1477816-1478720	IR	3	3	-	Ex.ONT.2770.42	-11.31	0.00456085	0.00480192	8|11.1111111111111|14.8148148148148	0|0|0	Chr1_1477816_1478720_R_Ex.ONT.2770.42_1
Chr1:3395571-3396879	AT1G10360	Chr1:3396101-3396485	IR	3	3	-	ONT.2995.2	-11.33	0.00128435	0.00160592	9.19540229885057|10.8108108108108|13.9784946236559	0|0|0	Chr1_3396101_3396485_R_ONT.2995.2_1
Chr4:9490995-9495816	AT4G16860	Chr4:9492073-9495230	IR	3	3	-	Ex.AT4G16860.1	-11.34	0.000149852	0.00065453	10.2564102564103|12.9213483146067|10.8433734939759	0|0|0	Chr4_9492073_9495230_R_Ex.AT4G16860.1_1
Chr1:1477507-1478878	ONT.2770	Chr1:1477786-1478734	IR	3	3	-	Ex.ONT.2770.30	-11.49	0.00204442	0.00215341	9.75609756097561|10|14.7058823529412	0|0|0	Chr1_1477786_1478734_R_Ex.ONT.2770.30_1
Chr5:1639034-1640606	AT5G05550	Chr5:1639358-1639823	IR	3	3	-	Ex.AT5G05550.1	-11.56	0.00641517	0.0329555	14.5161290322581|7.2289156626506|12.9411764705882	0|0|0	Chr5_1639358_1639823_R_Ex.AT5G05550.1_1
Chr1:7768043-7770135	AT1G22040	Chr1:7768052-7768345	IR	3	3	-	ONT.874.3	-11.57	0.00203849	0.00273638	13.953488372093|8.47457627118644|12.280701754386	0|0|0	Chr1_7768052_7768345_R_ONT.874.3_1
Chr3:21513258-21513920	AT3G58090	Chr3:21513480-21513569	IR	3	3	-	ONT.11770.2	-11.67	0.00511364	0.010577	7.69230769230769|14.8148148148148|12.5	0|0|0	Chr3_21513480_21513569_R_ONT.11770.2_1
Chr3:21406496-21407525	AT3G57790	Chr3:21407217-21407458	IR	3	3	-	ONT.11763.1	-11.67	0.00267067	0.00550908	11.9047619047619|14.5833333333333|8.51063829787234	0|0|0	Chr3_21407217_21407458_R_ONT.11763.1_1
Chr1:19486382-19487997	AT1G52320	Chr1:19487213-19487580	IR	3	3	-	Ex.AT1G52320.3	-11.71	0.00145042	0.00156934	9.09090909090909|14.2857142857143|11.7647058823529	0|0|0	Chr1_19487213_19487580_R_Ex.AT1G52320.3_1
Chr1:28490449-28491304	AT1G75880	Chr1:28490874-28491170	IR	3	3	-	Ex.AT1G75880.1	-11.75	0.00105609	0.00127016	14.2857142857143|9.52380952380952|11.4285714285714	0|0|0	Chr1_28490874_28491170_R_Ex.AT1G75880.1_1
Chr1:12550957-12552629	AT1G34370	Chr1:12551268-12551361	IR	3	3	-	AT1G34370.1	-11.84	2.92196e-07	3.04923e-07	11.986301369863|12.0521172638436|11.4942528735632	0|0|0	Chr1_12551268_12551361_R_AT1G34370.1_1
Chr3:2393691-2394675	AT3G07510	Chr3:2394487-2394573	IR	3	3	-	Ex.AT3G07510.1	-11.9	5.09523e-06	1.11084e-05	12.5|11.25|11.9565217391304	0|0|0	Chr3_2394487_2394573_R_Ex.AT3G07510.1_1
Chr3:2393691-2394616	AT3G07510	Chr3:2394487-2394567	IR	3	3	-	Ex.ONT.10324.1	-11.9	5.09523e-06	1.11084e-05	12.5|11.25|11.9565217391304	0|0|0	Chr3_2394487_2394567_R_Ex.ONT.10324.1_1
Chr1:8544420-8545551	AT1G24148	Chr1:8544630-8545019	IR	3	3	-	AT1G24148.2	-12.06	0.009378	0.0127526	17.0731707317073|8.57142857142857|10.5263157894737	0|0|0	Chr1_8544630_8545019_R_AT1G24148.2_1
Chr1:6709783-6711787	AT1G19396	Chr1:6709959-6711607	IR (overlapping region)	3	3	-	ONT.773.2	-12.06	4.59153e-07	6.07559e-07	11.7021276595745|12.0689655172414|12.396694214876	0|0|0	Chr1_6709959_6711607_R_ONT.773.2_1
Chr1:6709778-6711527	AT1G19396	Chr1:6709959-6711419	IR (overlapping region)	3	3	-	Ex.AT1G19396.1	-12.06	4.59153e-07	6.07559e-07	11.7021276595745|12.0689655172414|12.396694214876	0|0|0	Chr1_6709959_6711419_R_Ex.AT1G19396.1_1
Chr1:6709778-6711527	AT1G19396	Chr1:6709959-6711413	IR (overlapping region)	3	3	-	Ex.AT1G19396.3	-12.06	4.59153e-07	6.07559e-07	11.7021276595745|12.0689655172414|12.396694214876	0|0|0	Chr1_6709959_6711413_R_Ex.AT1G19396.3_1
Chr1:12550957-12552629	AT1G34370	Chr1:12551420-12551535	IR	3	3	-	AT1G34370.1	-12.11	1.68377e-08	1.75717e-08	12.2866894197952|12.0521172638436|12	0|0|0	Chr1_12551420_12551535_R_AT1G34370.1_1
Chr3:4377097-4378414	AT3G13440	Chr3:4378075-4378333	IR (overlapping region)	3	3	-	Ex.AT3G13440.1	-12.14	1.63951e-06	3.80292e-06	12.3287671232877|12.5|11.5942028985507	0|0|0	Chr3_4378075_4378333_R_Ex.AT3G13440.1_1
Chr4:7637530-7637662	AT4G13100	Chr4:7637658-7637662	A5SS	3	3	-	AT4G13100.4	-12.16	0.00316377	0.0129768	20|23.5294117647059|21.4285714285714	11.1111111111111|11.1111111111111|6.25	Chr4_7637530_7637662_S_AT4G13100.4_1
Chr3:17577350-17579604	AT3G47680	Chr3:17578779-17579312	IR (overlapping region)	3	3	-	ONT.11344.10	-12.17	0.00361189	0.00678216	8.19672131147541|14.0350877192982|14.2857142857143	0|0|0	Chr3_17578779_17579312_R_ONT.11344.10_1
Chr1:6709783-6711787	AT1G19396	Chr1:6709959-6710467	IR (overlapping region)	3	3	-	ONT.773.2	-12.24	0.00011421	0.000144771	10.752688172043|13.5593220338983|12.396694214876	0|0|0	Chr1_6709959_6710467_R_ONT.773.2_1
Chr3:6170292-6171608	ONT.8814	Chr3:6171263-6171348	IR (overlapping region)	3	3	-	ONT.8814.1	-12.25	0.00135355	0.00333227	15.1515151515152|11.7021276595745|9.9009900990099	0|0|0	Chr3_6171263_6171348_R_ONT.8814.1_1
Chr1:19486382-19487479	AT1G52320	Chr1:19487213-19487316	IR	3	3	-	AT1G52320.1	-12.29	0.00559452	0.00605306	9.09090909090909|11.1111111111111|16.6666666666667	0|0|0	Chr1_19487213_19487316_R_AT1G52320.1_1
Chr2:12617936-12618467	AT2G29420	Chr2:12618080-12618300	IR	3	3	-	AT2G29420.1	-12.32	0.00107465	0.00155393	14.9659863945578|12.0481927710843|9.93788819875776	0|0|0	Chr2_12618080_12618300_R_AT2G29420.1_1
Chr1:1477507-1478882	ONT.2770	Chr1:1477757-1478768	IR	3	3	-	Ex.ONT.2770.38	-12.33	0.00282036	0.00297003	11.9047619047619|9.30232558139535|15.7894736842105	0|0|0	Chr1_1477757_1478768_R_Ex.ONT.2770.38_1
Chr1:1477507-1478879	ONT.2770	Chr1:1477756-1478766	IR	3	3	-	Ex.ONT.2770.34	-12.33	0.00282036	0.00297003	11.9047619047619|9.30232558139535|15.7894736842105	0|0|0	Chr1_1477756_1478766_R_Ex.ONT.2770.34_1
Chr1:1477461-1478879	ONT.2770	Chr1:1477756-1478768	IR	3	3	-	Ex.ONT.2770.6	-12.33	0.00282036	0.00297003	11.9047619047619|9.30232558139535|15.7894736842105	0|0|0	Chr1_1477756_1478768_R_Ex.ONT.2770.6_1
Chr4:522627-524206	AT4G01250	Chr4:523588-523797	IR	3	3	-	ONT.13513.1	-12.4	0.00139179	0.00535094	11.6379310344828|15.4228855721393|10.1449275362319	0|0|0	Chr4_523588_523797_R_ONT.13513.1_1
Chr2:17073778-17074160	AT2G40920	Chr2:17073792-17073907	IR	3	3	-	ONT.7811.3	-12.6	0.00938055	0.014627	7.69230769230769|13.1578947368421|16.9491525423729	0|0|0	Chr2_17073792_17073907_R_ONT.7811.3_1
Chr1:6709783-6711787	AT1G19396	Chr1:6709959-6710114	IR (overlapping region)	3	3	-	ONT.773.2	-12.79	7.75988e-05	9.83764e-05	11.7021276595745|14.2857142857143|12.396694214876	0|0|0	Chr1_6709959_6710114_R_ONT.773.2_1
Chr2:13672250-13673256	AT2G32180	Chr2:13672809-13673187	IR	3	3	-	Ex.AT2G32180.1	-13.01	0.000131048	0.000192492	13.7055837563452|11.2359550561798|14.1025641025641	0|0|0	Chr2_13672809_13673187_R_Ex.AT2G32180.1_1
Chr1:9184663-9187524	AT1G26580	Chr1:9185765-9185876	IR	3	3	-	ONT.1003.3	-13.07	0.000364396	0.000499623	14.0740740740741|10.7438016528926|14.4067796610169	0|0|0	Chr1_9185765_9185876_R_ONT.1003.3_1
Chr1:4575408-4576632	AT1G13350	Chr1:4575836-4576238	IR	3	3	-	Ex.AT1G13350.1	-13.22	0.00177172	0.00226139	9.85915492957746|13.8461538461538|15.9420289855072	0|0|0	Chr1_4575836_4576238_R_Ex.AT1G13350.1_1
Chr2:9664165-9666981	AT2G22740	Chr2:9666636-9666863	IR	3	3	-	Ex.AT2G22740.1	-13.33	0.00749043	0.0132296	16|16|8	0|0|0	Chr2_9666636_9666863_R_Ex.AT2G22740.1_1
Chr5:17930098-17931936	AT5G44510	Chr5:17930330-17930508	IR	3	3	-	ONT.18573.1	-13.45	0.00894119	0.0490884	12.5|9.09090909090909|18.75	0|0|0	Chr5_17930330_17930508_R_ONT.18573.1_1
Chr3:17200319-17201889	AT3G46700	Chr3:17201308-17201382	IR	3	3	-	ONT.11305.2	-13.49	1.45318e-06	2.70971e-06	14|13.5135135135135|12.962962962963	0|0|0	Chr3_17201308_17201382_R_ONT.11305.2_1
Chr5:2330399-2332281	AT5G07370	Chr5:2330498-2330784	IR	3	3	-	AT5G07370.4	-13.71	0.000328873	0.00257377	11.7370892018779|13.5416666666667|15.8653846153846	0|0|0	Chr5_2330498_2330784_R_AT5G07370.4_1
Chr4:7595002-7595992	AT4G12990	Chr4:7595430-7595823	IR	3	3	-	ONT.13804.7	-13.71	0.00707042	0.0288749	9.87654320987654|12.3456790123457|18.9189189189189	0|0|0	Chr4_7595430_7595823_R_ONT.13804.7_1
Chr3:20916172-20920641	AT3G56410	Chr3:20916597-20919494	IR (overlapping region)	3	3	-	AT3G56410.1	-13.73	0.00050299	0.00102617	13.1578947368421|11.7647058823529|16.2790697674419	0|0|0	Chr3_20916597_20919494_R_AT3G56410.1_1
Chr3:22810065-22810725	AT3G61640	Chr3:22810393-22810514	IR	3	3	-	ONT.11896.2	-13.91	0.000485297	0.00103741	11.25|15.4929577464789|15	0|0|0	Chr3_22810393_22810514_R_ONT.11896.2_1
Chr4:7594986-7595992	AT4G12990	Chr4:7595536-7595823	IR	3	3	-	Ex.ONT.13804.6	-14.07	0.00589276	0.0240708	9.87654320987654|13.4146341463415|18.9189189189189	0|0|0	Chr4_7595536_7595823_R_Ex.ONT.13804.6_1
Chr5:17045359-17047113	ONT.16234	Chr5:17045660-17046810	IR	3	3	-	ONT.16234.3	-14.12	0.000469224	0.00247765	11.4285714285714|15.3846153846154|15.5555555555556	0|0|0	Chr5_17045660_17046810_R_ONT.16234.3_1
Chr5:17045359-17047113	ONT.16234	Chr5:17045570-17046810	IR	3	3	-	ONT.16234.3	-14.12	0.000469224	0.00247765	11.4285714285714|15.3846153846154|15.5555555555556	0|0|0	Chr5_17045570_17046810_R_ONT.16234.3_1
Chr5:8468336-8469242	ONT.18152	Chr5:8468673-8469014	IR	3	3	-	Ex.ONT.18152.3	-14.15	3.11042e-05	0.00220252	14.9560117302053|12.8|14.6814404432133	0|0|0	Chr5_8468673_8469014_R_Ex.ONT.18152.3_1
Chr3:19207281-19208448	ONT.9572	Chr3:19207796-19207970	IR (overlapping region)	3	3	-	ONT.9572.1	-14.17	7.0227e-05	0.000135574	12.5|15.0442477876106|14.9532710280374	0|0|0	Chr3_19207796_19207970_R_ONT.9572.1_1
Chr5:8468338-8469262	ONT.18152	Chr5:8468673-8469107	IR	3	3	-	Ex.ONT.18152.4	-14.23	3.82585e-05	0.00270392	15.0805270863836|12.8|14.7994467496542	0|0|0	Chr5_8468673_8469107_R_Ex.ONT.18152.4_1
Chr1:7882536-7883742	AT1G22310	Chr1:7883126-7883196	IR	3	3	-	AT1G22310.2	-14.86	0.0016575	0.00222805	18.5185185185185|14.2857142857143|11.7647058823529	0|0|0	Chr1_7883126_7883196_R_AT1G22310.2_1
Chr1:22409647-22410498	AT1G60870	Chr1:22409915-22409986	IR (overlapping region)	3	3	-	ONT.1797.3	-14.86	5.27075e-05	5.90583e-05	14.1414141414141|16.4835164835165|13.9575971731449	0|0|0	Chr1_22409915_22409986_R_ONT.1797.3_1
Chr4:18273973-18275017	AT4G39260	Chr4:18274570-18274855	IR	3	3	-	ONT.14900.3	-14.94	3.33722e-05	0.000122671	14.2640364188164|16.3926726162518|14.1556668183887	0|0|0	Chr4_18274570_18274855_R_ONT.14900.3_1
Chr4:18273973-18275017	AT4G39260	Chr4:18274570-18274848	IR	3	3	-	ONT.14900.3	-14.95	3.20232e-05	0.000117736	14.2640364188164|16.3926726162518|14.1947224749773	0|0|0	Chr4_18274570_18274848_R_ONT.14900.3_1
Chr4:18273973-18275017	AT4G39260	Chr4:18274568-18274850	IR	3	3	-	ONT.14900.3	-14.95	3.20232e-05	0.000117736	14.2640364188164|16.3926726162518|14.1947224749773	0|0|0	Chr4_18274568_18274850_R_ONT.14900.3_1
Chr1:6265303-6266816	AT1G18200	Chr1:6265885-6266438	IR	3	3	-	ONT.3317.2	-14.97	0.000135661	0.000178053	16.2162162162162|12.9032258064516|15.7894736842105	0|0|0	Chr1_6265885_6266438_R_ONT.3317.2_1
Chr1:29993208-29993914	ONT.2544	Chr1:29993405-29993485	IR (overlapping region)	3	3	-	ONT.2544.1	-14.98	0.000188883	0.00023273	12.719298245614|16.25|15.9663865546218	0|0|0	Chr1_29993405_29993485_R_ONT.2544.1_1
Chr4:18273973-18275017	AT4G39260	Chr4:18274568-18274692	IR	3	3	-	ONT.14900.3	-15.02	3.24655e-05	0.00011935	14.3073811931244|16.4711403097137|14.2727272727273	0|0|0	Chr4_18274568_18274692_R_ONT.14900.3_1
Chr3:19207281-19208448	ONT.9572	Chr3:19207462-19207538	IR (overlapping region)	3	3	-	ONT.9572.1	-15.02	3.15386e-05	6.08887e-05	13.9130434782609|14.7826086956522|16.3793103448276	0|0|0	Chr3_19207462_19207538_R_ONT.9572.1_1
Chr5:2330399-2332281	AT5G07370	Chr5:2330498-2331232	IR	3	3	-	AT5G07370.4	-15.2	0.00104809	0.00819189	12.5581395348837|14.4329896907216|18.6046511627907	0|0|0	Chr5_2330498_2331232_R_AT5G07370.4_1
Chr5:2330399-2332281	AT5G07370	Chr5:2330498-2331226	IR	3	3	-	AT5G07370.4	-15.2	0.00104809	0.00819189	12.5581395348837|14.4329896907216|18.6046511627907	0|0|0	Chr5_2330498_2331226_R_AT5G07370.4_1
Chr5:7019534-7019988	AT5G20730	Chr5:7019730-7019823	IR	3	3	-	Ex.AT5G20730.2	-15.36	0.000996149	0.0337415	18.9189189189189|13.6363636363636|13.5135135135135	0|0|0	Chr5_7019730_7019823_R_Ex.AT5G20730.2_1
Chr5:7019534-7019988	AT5G20730	Chr5:7019730-7019820	IR	3	3	-	Ex.AT5G20730.1	-15.36	0.000996149	0.0337415	18.9189189189189|13.6363636363636|13.5135135135135	0|0|0	Chr5_7019730_7019820_R_Ex.AT5G20730.1_1
Chr3:4182995-4183975	AT3G13060	Chr3:4183208-4183293	IR (overlapping region)	3	3	-	AT3G13060.1	-15.4	0.00301401	0.00695035	19.7080291970803|11.4285714285714|15.0602409638554	0|0|0	Chr3_4183208_4183293_R_AT3G13060.1_1
Chr5:3333459-3335232	AT5G10550	Chr5:3334920-3335013	IR (overlapping region)	3	3	-	Ex.AT5G10550.1	-15.46	0.00108337	0.0144205	17.6744186046512|11.8226600985222|16.8888888888889	0|0|0	Chr5_3334920_3335013_R_Ex.AT5G10550.1_1
Chr5:20106653-20107191	AT5G49550	Chr5:20107002-20107072	IR	3	3	-	Ex.AT5G49550.1	-15.47	0.000353537	0.00219733	15.8940397350993|17.6|12.9032258064516	0|0|0	Chr5_20107002_20107072_R_Ex.AT5G49550.1_1
Chr5:20106631-20107210	AT5G49550	Chr5:20106983-20107072	IR	3	3	-	Ex.ONT.18763.3	-15.47	0.000353537	0.00219733	15.8940397350993|17.6|12.9032258064516	0|0|0	Chr5_20106983_20107072_R_Ex.ONT.18763.3_1
Chr2:1687340-1687817	AT2G04800	Chr2:1687617-1687788	IR	3	3	-	Ex.AT2G04800.1	-15.56	0.0042459	0.00659291	19.4174757281553|16.8067226890756|10.4651162790698	0|0|0	Chr2_1687617_1687788_R_Ex.AT2G04800.1_1
Chr5:2330399-2332281	AT5G07370	Chr5:2331044-2331226	IR	3	3	-	AT5G07370.4	-15.77	0.000746959	0.00584074	13.3663366336634|14.8936170212766|19.047619047619	0|0|0	Chr5_2331044_2331226_R_AT5G07370.4_1
Chr5:2330399-2332281	AT5G07370	Chr5:2330845-2331226	IR	3	3	-	AT5G07370.4	-15.77	0.000746959	0.00584074	13.3663366336634|14.8936170212766|19.047619047619	0|0|0	Chr5_2330845_2331226_R_AT5G07370.4_1
Chr5:5355085-5356300	AT5G16360	Chr5:5355994-5356101	IR	3	3	-	ONT.17821.2	-15.94	0.00501103	0.100634	19.672131147541|10.3448275862069|17.8082191780822	0|0|0	Chr5_5355994_5356101_R_ONT.17821.2_1
Chr4:18273957-18274567	AT4G39260	Chr4:18274279-18274470	IR	3	3	-	ONT.14900.2	-15.94	2.64243e-05	9.718e-05	15.25|17.4013921113689|15.1596941070625	0|0|0	Chr4_18274279_18274470_R_ONT.14900.2_1
Chr1:22551345-22554649	AT1G61180	Chr1:22554111-22554285	IR	3	3	-	AT1G61180.2	-15.96	0.00186491	0.00209479	12.5|15.3846153846154|20	0|0|0	Chr1_22554111_22554285_R_AT1G61180.2_1
Chr5:4041120-4042074	AT5G12440	Chr5:4041710-4042037	IR	3	3	-	ONT.17674.2	-16.06	0.00641761	0.0965426	10|20|18.1818181818182	0|0|0	Chr5_4041710_4042037_R_ONT.17674.2_1
Chr5:4041120-4042074	AT5G12440	Chr5:4041649-4042037	IR	3	3	-	ONT.17674.2	-16.06	0.00641761	0.0965426	10|20|18.1818181818182	0|0|0	Chr5_4041649_4042037_R_ONT.17674.2_1
Chr1:25453929-25455748	AT1G67880	Chr1:25455182-25455381	IR	3	3	-	ONT.4598.2	-16.07	0.00188198	0.00218274	17.3913043478261|11.7647058823529|19.047619047619	0|0|0	Chr1_25455182_25455381_R_ONT.4598.2_1
Chr1:12051739-12052559	ONT.1241	Chr1:12052117-12052198	IR (overlapping region)	3	3	-	ONT.1241.1	-16.11	0.00986458	0.0102619	9.34579439252336|18.018018018018|20.952380952381	0|0|0	Chr1_12052117_12052198_R_ONT.1241.1_1
Chr1:12051739-12052559	ONT.1241	Chr1:12052113-12052198	IR (overlapping region)	3	3	-	ONT.1241.1	-16.11	0.00986458	0.0102619	9.34579439252336|18.018018018018|20.952380952381	0|0|0	Chr1_12052113_12052198_R_ONT.1241.1_1
Chr5:7019821-7020161	AT5G20730	Chr5:7019989-7020070	IR	3	3	-	Ex.AT5G20730.3	-16.13	0.00197378	0.067041	20.5882352941176|14.2857142857143|13.5135135135135	0|0|0	Chr5_7019989_7020070_R_Ex.AT5G20730.3_1
Chr5:23152763-23153218	ONT.19019	Chr5:23152992-23153083	IR (overlapping region)	3	3	-	ONT.19019.1	-16.3	5.70246e-06	4.3761e-05	15.929203539823|15.6626506024096|17.3076923076923	0|0|0	Chr5_23152992_23153083_R_ONT.19019.1_1
Chr5:8947373-8948382	AT5G25630	Chr5:8947498-8947696	IR	3	3	-	ONT.15890.4	-16.41	4.58388e-05	0.00479949	18.1434599156118|15.5963302752294|15.4929577464789	0|0|0	Chr5_8947498_8947696_R_ONT.15890.4_1
Chr1:6266439-6266816	AT1G18200	Chr1:6266663-6266778	IR (overlapping region)	3	3	-	ONT.3317.1	-16.6	1.84724e-05	2.42457e-05	16.2162162162162|15.625|17.9487179487179	0|0|0	Chr1_6266663_6266778_R_ONT.3317.1_1
Chr1:22767674-22768502	AT1G61667	Chr1:22768089-22768213	IR (overlapping region)	3	3	-	ONT.1820.2	-16.8	2.38185e-05	2.68407e-05	17.9487179487179|17.0731707317073|15.3846153846154	0|0|0	Chr1_22768089_22768213_R_ONT.1820.2_1
Chr5:6470171-6471062	AT5G19240	Chr5:6470291-6470463	IR	3	3	-	ONT.15671.2	-16.82	0.00140012	0.0379747	13.28125|20.6521739130435|16.5137614678899	0|0|0	Chr5_6470291_6470463_R_ONT.15671.2_1
Chr1:6712053-6714244	AT1G19400	Chr1:6712438-6712535	IR	3	3	-	ONT.3362.3	-16.82	4.60578e-07	6.09422e-07	17.3076923076923|16.3380281690141|16.8	0|0|0	Chr1_6712438_6712535_R_ONT.3362.3_1
Chr1:30022260-30022981	AT1G79820	Chr1:30022603-30022834	IR	3	3	-	Ex.AT1G79820.4	-16.86	0.00384223	0.00474147	11.7647058823529|17.3913043478261|21.4285714285714	0|0|0	Chr1_30022603_30022834_R_Ex.AT1G79820.4_1
Chr1:27439452-27440464	AT1G72930	Chr1:27439974-27440071	IR	3	3	-	Ex.AT1G72930.2	-17.02	0.000125384	0.000148736	17.0854271356784|18.9873417721519|14.9732620320856	0|0|0	Chr1_27439974_27440071_R_Ex.AT1G72930.2_1
Chr1:27439452-27440464	AT1G72930	Chr1:27439931-27440071	IR	3	3	-	Ex.AT1G72930.1	-17.19	0.000193114	0.000229073	17.0854271356784|19.4968553459119|14.9732620320856	0|0|0	Chr1_27439931_27440071_R_Ex.AT1G72930.1_1
Chr1:1477507-1478873	ONT.2770	Chr1:1477777-1478720	IR	3	3	-	Ex.ONT.2770.23	-17.3	0.0030402	0.00320145	11.9047619047619|20|20	0|0|0	Chr1_1477777_1478720_R_Ex.ONT.2770.23_1
Chr2:9265253-9266371	AT2G21660	Chr2:9265894-9266036	IR	3	3	-	Ex.ONT.7034.2	-17.43	4.03752e-05	7.09083e-05	16.3127413127413|19.188767550702|16.7771545130036	0|0|0	Chr2_9265894_9266036_R_Ex.ONT.7034.2_1
Chr2:9265280-9266371	AT2G21660	Chr2:9265894-9266202	IR	3	3	-	ONT.7034.8	-17.48	3.52807e-05	6.19701e-05	16.3934426229508|19.188767550702|16.8619460010189	0|0|0	Chr2_9265894_9266202_R_ONT.7034.8_1
Chr4:18276672-18279708	ONT.14901	Chr4:18278769-18278856	IR (overlapping region)	3	3	-	ONT.14901.1	-17.58	0.00576697	0.0211751	21.6216216216216|20|11.1111111111111	0|0|0	Chr4_18278769_18278856_R_ONT.14901.1_1
Chr5:5571550-5572390	AT5G16940	Chr5:5572224-5572322	IR	3	3	-	Ex.AT5G16940.1	-17.63	0.000674372	0.0141946	21.0526315789474|17.1428571428571|14.7058823529412	0|0|0	Chr5_5572224_5572322_R_Ex.AT5G16940.1_1
Chr1:20058699-20059411	ONT.4154	Chr1:20058914-20059002	IR (overlapping region)	3	3	-	ONT.4154.1	-17.64	0.00872489	0.00950436	25|14.2857142857143|13.6363636363636	0|0|0	Chr1_20058914_20059002_R_ONT.4154.1_1
Chr5:26615355-26616990	AT5G66675	Chr5:26616687-26616812	IR	3	3	-	AT5G66675.1	-17.85	0.00157117	0.0175721	15.1898734177215|15.8536585365854|22.5	0|0|0	Chr5_26616687_26616812_R_AT5G66675.1_1
Chr5:26615355-26616990	AT5G66675	Chr5:26616575-26616707	IR	3	3	-	AT5G66675.1	-17.85	0.00157117	0.0175721	15.1898734177215|15.8536585365854|22.5	0|0|0	Chr5_26616575_26616707_R_AT5G66675.1_1
Chr2:9265280-9266371	AT2G21660	Chr2:9265885-9266200	IR	3	3	-	ONT.7034.8	-17.89	3.9905e-05	7.00893e-05	16.7326732673267|19.692144373673|17.2503920543649	0|0|0	Chr2_9265885_9266200_R_ONT.7034.8_1
Chr3:9513814-9514101	AT3G26020	Chr3:9513855-9514037	IR (overlapping region)	3	3	-	ONT.9138.2	-17.9	0.000462626	0.00122449	14.8148148148148|18.1818181818182|20.6896551724138	0|0|0	Chr3_9513855_9514037_R_ONT.9138.2_1
Chr1:1477508-1478879	ONT.2770	Chr1:1477774-1478720	IR	3	3	-	Ex.ONT.2770.39	-17.95	0.00429436	0.00452147	11.9047619047619|20|21.9512195121951	0|0|0	Chr1_1477774_1478720_R_Ex.ONT.2770.39_1
Chr1:1477507-1478879	ONT.2770	Chr1:1477777-1478687	IR	3	3	-	Ex.ONT.2770.33	-17.95	0.00429436	0.00452147	11.9047619047619|20|21.9512195121951	0|0|0	Chr1_1477777_1478687_R_Ex.ONT.2770.33_1
Chr5:2060504-2061954	AT5G06690	Chr5:2060750-2060871	IR	3	3	-	ONT.17451.3	-17.99	0.000438716	0.00278275	16.8831168831169|21.3114754098361|15.7894736842105	0|0|0	Chr5_2060750_2060871_R_ONT.17451.3_1
Chr5:21596236-21597734	AT5G53220	Chr5:21596712-21596812	IR	3	3	-	Ex.AT5G53220.1	-18.3	0.00732746	0.0505617	17.3913043478261|25|12.5	0|0|0	Chr5_21596712_21596812_R_Ex.AT5G53220.1_1
Chr1:1477507-1478878	ONT.2770	Chr1:1477744-1478699	IR	3	3	-	Ex.ONT.2770.29	-18.3	0.00205697	0.0021665	15.2173913043478|16.2790697674419|23.4042553191489	0|0|0	Chr1_1477744_1478699_R_Ex.ONT.2770.29_1
Chr1:1477507-1478874	ONT.2770	Chr1:1477744-1478703	IR	3	3	-	Ex.ONT.2770.26	-18.3	0.00205697	0.0021665	15.2173913043478|16.2790697674419|23.4042553191489	0|0|0	Chr1_1477744_1478703_R_Ex.ONT.2770.26_1
Chr5:5571551-5572370	AT5G16940	Chr5:5572217-5572322	IR	3	3	-	ONT.17843.2	-18.31	0.00181064	0.0380897	23.0769230769231|17.1428571428571|14.7058823529412	0|0|0	Chr5_5572217_5572322_R_ONT.17843.2_1
Chr5:2060504-2061954	AT5G06690	Chr5:2060750-2060957	IR	3	3	-	ONT.17451.3	-18.36	0.000240287	0.00152439	16.8831168831169|21.3114754098361|16.8831168831169	0|0|0	Chr5_2060750_2060957_R_ONT.17451.3_1
Chr2:8695374-8696052	AT2G20142	Chr2:8695839-8695979	IR	3	3	-	Ex.AT2G20142.1	-18.55	0.00790369	0.0136878	24|11.3207547169811|20.3389830508475	0|0|0	Chr2_8695839_8695979_R_Ex.AT2G20142.1_1
Chr2:8695370-8697094	AT2G20142	Chr2:8695839-8696149	IR	3	3	-	ONT.5516.3	-18.55	0.00790369	0.0136878	24|11.3207547169811|20.3389830508475	0|0|0	Chr2_8695839_8696149_R_ONT.5516.3_1
Chr2:9265280-9266371	AT2G21660	Chr2:9265491-9266202	IR	3	3	-	ONT.7034.8	-18.65	9.03503e-05	0.00015857	17.1428571428571|20.9508881922675|17.8515827711469	0|0|0	Chr2_9265491_9266202_R_ONT.7034.8_1
Chr2:9265280-9266371	AT2G21660	Chr2:9265485-9266202	IR	3	3	-	ONT.7034.8	-18.65	9.03503e-05	0.00015857	17.1428571428571|20.9508881922675|17.8515827711469	0|0|0	Chr2_9265485_9266202_R_ONT.7034.8_1
Chr2:8695980-8696643	AT2G20142	Chr2:8696053-8696149	IR	3	3	-	Ex.AT2G20142.1	-18.77	0.00878791	0.0152162	24.6575342465753|11.3207547169811|20.3389830508475	0|0|0	Chr2_8696053_8696149_R_Ex.AT2G20142.1_1
Chr2:19614698-19615769	AT2G47910	Chr2:19614941-19615014	IR (overlapping region)	3	3	-	AT2G47910.2	-18.9	0.000202639	0.000333103	21.7391304347826|18.018018018018|16.9354838709677	0|0|0	Chr2_19614941_19615014_R_AT2G47910.2_1
Chr2:19614698-19615769	AT2G47910	Chr2:19614937-19615014	IR (overlapping region)	3	3	-	AT2G47910.2	-18.9	0.000202639	0.000333103	21.7391304347826|18.018018018018|16.9354838709677	0|0|0	Chr2_19614937_19615014_R_AT2G47910.2_1
Chr1:13838548-13839083	ONT.3886	Chr1:13838776-13839001	IR	3	3	-	ONT.3886.2	-19.04	0.000612076	0.000643322	21.0526315789474|20.9302325581395|15.1515151515152	0|0|0	Chr1_13838776_13839001_R_ONT.3886.2_1
Chr1:3785507-3786990	AT1G11270	Chr1:3786675-3786797	IR	3	3	-	Ex.AT1G11270.1	-19.13	1.6897e-05	2.12512e-05	18.1818181818182|18.5185185185185|20.6896551724138	0|0|0	Chr1_3786675_3786797_R_Ex.AT1G11270.1_1
Chr4:15854318-15854709	AT4G32850	Chr4:15854440-15854546	IR	3	3	-	Ex.AT4G32850.2	-19.14	3.68831e-05	0.000121156	18.1818181818182|21.0526315789474|18.1818181818182	0|0|0	Chr4_15854440_15854546_R_Ex.AT4G32850.2_1
Chr3:16945364-16945750	AT3G46130	Chr3:16945583-16945620	IR	3	3	-	AT3G46130.2	-19.24	0.000817098	0.00151609	19.2771084337349|22.9007633587786|15.5555555555556	0|0|0	Chr3_16945583_16945620_R_AT3G46130.2_1
Chr3:16945364-16945750	AT3G46130	Chr3:16945551-16945620	IR	3	3	-	AT3G46130.2	-19.24	0.000817098	0.00151609	19.2771084337349|22.9007633587786|15.5555555555556	0|0|0	Chr3_16945551_16945620_R_AT3G46130.2_1
Chr2:8695370-8697094	AT2G20142	Chr2:8695839-8695950	IR	3	3	-	ONT.5516.3	-19.39	0.00796653	0.0137953	24|11.5384615384615|22.6415094339623	0|0|0	Chr2_8695839_8695950_R_ONT.5516.3_1
Chr3:17197631-17199244	AT3G46690	Chr3:17198638-17198716	IR	3	3	-	ONT.11304.2	-19.59	0.00409485	0.00763443	24.390243902439|21.1538461538462|13.2352941176471	0|0|0	Chr3_17198638_17198716_R_ONT.11304.2_1
Chr3:5337548-5338556	AT3G15760	Chr3:5337897-5337974	IR	3	3	-	ONT.8715.2	-19.68	2.07099e-07	4.97263e-07	19.205298013245|19.6969696969697|20.1342281879195	0|0|0	Chr3_5337897_5337974_R_ONT.8715.2_1
Chr4:10151124-10152109	AT4G18372	Chr4:10151709-10152069	IR	3	3	-	ONT.14041.2	-19.92	0.000344758	0.000928833	17.5|18.9189189189189|23.3333333333333	0|0|0	Chr4_10151709_10152069_R_ONT.14041.2_1
Chr4:10151050-10152115	AT4G18372	Chr4:10151712-10152074	IR	3	3	-	Ex.ONT.14041.1	-19.92	0.000344758	0.000928833	17.5|18.9189189189189|23.3333333333333	0|0|0	Chr4_10151712_10152074_R_Ex.ONT.14041.1_1
Chr4:7653692-7654967	AT4G13160	Chr4:7653701-7653876	IR	3	3	-	ONT.12350.2	-20.01	6.18349e-08	2.53967e-07	20.3703703703704|20|19.672131147541	0|0|0	Chr4_7653701_7653876_R_ONT.12350.2_1
Chr3:5052731-5054942	AT3G15010	Chr3:5054063-5054605	IR	3	3	-	AT3G15010.2	-20.26	0.00392151	0.00932388	26.9662921348315|17.7083333333333|16.1016949152542	0|0|0	Chr3_5054063_5054605_R_AT3G15010.2_1
Chr2:19320363-19320700	AT2G47020	Chr2:19320459-19320541	IR (overlapping region)	3	3	-	Ex.AT2G47020.1	-20.4	0.00714165	0.0116604	20.5882352941176|27.2727272727273|13.3333333333333	0|0|0	Chr2_19320459_19320541_R_Ex.AT2G47020.1_1
Chr2:19320363-19320700	AT2G47020	Chr2:19320454-19320541	IR (overlapping region)	3	3	-	Ex.AT2G47020.2	-20.4	0.00714165	0.0116604	20.5882352941176|27.2727272727273|13.3333333333333	0|0|0	Chr2_19320454_19320541_R_Ex.AT2G47020.2_1
Chr5:1639454-1640606	AT5G05550	Chr5:1639552-1639823	IR	3	3	-	Ex.AT5G05550.2	-20.55	0.00310517	0.0159583	25|14.2857142857143|22.3684210526316	0|0|0	Chr5_1639552_1639823_R_Ex.AT5G05550.2_1
Chr3:16945364-16945750	AT3G46130	Chr3:16945493-16945620	IR	3	3	-	AT3G46130.2	-20.57	0.000738238	0.00137004	21.1764705882353|24.0601503759398|16.4835164835165	0|0|0	Chr3_16945493_16945620_R_AT3G46130.2_1
Chr2:18461957-18463271	AT2G44790	Chr2:18462619-18463060	IR (overlapping region)	3	3	-	ONT.7975.2	-20.58	0.000354367	0.000569576	20|24|17.7489177489178	0|0|0	Chr2_18462619_18463060_R_ONT.7975.2_1
Chr1:5430386-5431003	ONT.603	Chr1:5430654-5430822	IR (overlapping region)	3	3	-	ONT.603.1	-20.65	0.00751502	0.00971694	23.5294117647059|12.5|25.9259259259259	0|0|0	Chr1_5430654_5430822_R_ONT.603.1_1
Chr4:9545459-9546241	ONT.13983	Chr4:9545547-9546018	IR (overlapping region)	3	3	-	Ex.ONT.13983.2	-20.71	0.00850117	0.037385	25|12.1212121212121|25	0|0|0	Chr4_9545547_9546018_R_Ex.ONT.13983.2_1
Chr3:20296232-20297184	AT3G54810	Chr3:20296400-20296928	IR	3	3	-	Ex.AT3G54810.2	-20.76	0.000278874	0.000557612	23.5294117647059|17.5675675675676|21.1764705882353	0|0|0	Chr3_20296400_20296928_R_Ex.AT3G54810.2_1
Chr1:1477461-1478874	ONT.2770	Chr1:1477732-1478699	IR	3	3	-	Ex.ONT.2770.4	-20.94	0.0083804	0.00882259	15.2173913043478|18.1818181818182|29.4117647058824	0|0|0	Chr1_1477732_1478699_R_Ex.ONT.2770.4_1
Chr3:21715192-21715549	AT3G58710	Chr3:21715317-21715405	IR (overlapping region)	3	3	-	Ex.AT3G58710.2	-21.18	0.0070328	0.0146338	29.1666666666667|19.2307692307692|15.1515151515152	0|0|0	Chr3_21715317_21715405_R_Ex.AT3G58710.2_1
Chr3:21715052-21715549	AT3G58710	Chr3:21715321-21715405	IR (overlapping region)	3	3	-	Ex.ONT.9843.2	-21.18	0.0070328	0.0146338	29.1666666666667|19.2307692307692|15.1515151515152	0|0|0	Chr3_21715321_21715405_R_Ex.ONT.9843.2_1
Chr3:21715007-21715549	AT3G58710	Chr3:21715317-21715402	IR (overlapping region)	3	3	-	Ex.AT3G58710.1	-21.18	0.0070328	0.0146338	29.1666666666667|19.2307692307692|15.1515151515152	0|0|0	Chr3_21715317_21715402_R_Ex.AT3G58710.1_1
Chr2:12905556-12906167	ONT.5897	Chr2:12906043-12906155	IR (overlapping region)	3	3	-	ONT.5897.1	-21.33	0.00077385	0.00112264	25.8992805755396|19.7278911564626|18.3673469387755	0|0|0	Chr2_12906043_12906155_R_ONT.5897.1_1
Chr2:12905556-12906167	ONT.5897	Chr2:12905827-12905953	IR (overlapping region)	3	3	-	ONT.5897.1	-21.41	0.000590159	0.000856187	25.7142857142857|19.7278911564626|18.7919463087248	0|0|0	Chr2_12905827_12905953_R_ONT.5897.1_1
Chr1:3785507-3786674	AT1G11270	Chr1:3785849-3785997	IR	3	3	-	AT1G11270.1	-21.45	6.2622e-05	7.87537e-05	22.2222222222222|19.047619047619|23.0769230769231	0|0|0	Chr1_3785849_3785997_R_AT1G11270.1_1
Chr3:5052731-5054062	AT3G15010	Chr3:5053194-5053279	IR	3	3	-	AT3G15010.1	-21.56	0.00241107	0.005733	27.7777777777778|19.3877551020408|17.5	0|0|0	Chr3_5053194_5053279_R_AT3G15010.1_1
Chr1:7421238-7423192	AT1G21200	Chr1:7421273-7421463	IR	3	3	-	ONT.839.2	-21.58	0.000938684	0.00125336	24.390243902439|23.6842105263158|16.6666666666667	0|0|0	Chr1_7421273_7421463_R_ONT.839.2_1
Chr5:26564490-26566771	ONT.19426	Chr5:26566011-26566092	IR (overlapping region)	3	3	-	ONT.19426.1	-21.59	0.00283834	0.0317057	15.3846153846154|22.7272727272727|26.6666666666667	0|0|0	Chr5_26566011_26566092_R_ONT.19426.1_1
Chr1:27432199-27433774	AT1G72900	Chr1:27432680-27432904	IR	3	3	-	ONT.2266.1	-21.59	0.00421797	0.00500322	21.1382113821138|28.1818181818182|15.4545454545455	0|0|0	Chr1_27432680_27432904_R_ONT.2266.1_1
Chr1:1477475-1478871	ONT.2770	Chr1:1477774-1478645	IR	3	3	-	Ex.ONT.2770.15	-21.68	0.00556709	0.00586118	13.953488372093|27.2727272727273|23.8095238095238	0|0|0	Chr1_1477774_1478645_R_Ex.ONT.2770.15_1
Chr4:18276672-18279708	ONT.14901	Chr4:18279089-18279162	IR (overlapping region)	3	3	-	ONT.14901.1	-21.73	0.000905112	0.00332571	25.7142857142857|22.2222222222222|17.2413793103448	0|0|0	Chr4_18279089_18279162_R_ONT.14901.1_1
Chr4:18276672-18279708	ONT.14901	Chr4:18278996-18279162	IR (overlapping region)	3	3	-	ONT.14901.1	-21.73	0.000905112	0.00332571	25.7142857142857|22.2222222222222|17.2413793103448	0|0|0	Chr4_18278996_18279162_R_ONT.14901.1_1
Chr5:2204248-2205715	AT5G07100	Chr5:2204540-2204629	IR	3	3	-	ONT.15208.4	-21.74	0.00192049	0.0137368	20|17.6470588235294|27.5862068965517	0|0|0	Chr5_2204540_2204629_R_ONT.15208.4_1
Chr1:21742944-21743947	ONT.4293	Chr1:21743299-21743482	IR	3	3	-	ONT.4293.2	-22.28	0.00101933	0.00113395	18.5185185185185|21.0526315789474|27.2727272727273	0|0|0	Chr1_21743299_21743482_R_ONT.4293.2_1
Chr1:21742944-21743947	ONT.4293	Chr1:21743287-21743482	IR	3	3	-	ONT.4293.2	-22.28	0.00101933	0.00113395	18.5185185185185|21.0526315789474|27.2727272727273	0|0|0	Chr1_21743287_21743482_R_ONT.4293.2_1
Chr5:26564490-26566771	ONT.19426	Chr5:26564581-26564681	IR (overlapping region)	3	3	-	ONT.19426.1	-22.29	8.50808e-07	9.50685e-06	22.7272727272727|22.7272727272727|21.4285714285714	0|0|0	Chr5_26564581_26564681_R_ONT.19426.1_1
Chr1:4575778-4576621	AT1G13350	Chr1:4576048-4576238	IR	3	3	-	ONT.3106.3	-22.39	0.0036276	0.00462909	16.2790697674419|21.9512195121951|28.9473684210526	0|0|0	Chr1_4576048_4576238_R_ONT.3106.3_1
Chr1:4575778-4576621	AT1G13350	Chr1:4575996-4576238	IR	3	3	-	ONT.3106.3	-22.39	0.0036276	0.00462909	16.2790697674419|21.9512195121951|28.9473684210526	0|0|0	Chr1_4575996_4576238_R_ONT.3106.3_1
Chr1:25137172-25137932	ONT.4565	Chr1:25137663-25137893	IR	3	3	-	ONT.4565.2	-22.47	0.000247368	0.000285926	25.4901960784314|22.7272727272727|19.2	0|0|0	Chr1_25137663_25137893_R_ONT.4565.2_1
Chr1:25137172-25137932	ONT.4565	Chr1:25137663-25137843	IR	3	3	-	ONT.4565.2	-22.69	0.000154854	0.000178998	25.4901960784314|22.7272727272727|19.8412698412698	0|0|0	Chr1_25137663_25137843_R_ONT.4565.2_1
Chr2:5864894-5865603	ONT.6809	Chr2:5865237-5865318	IR	3	3	-	ONT.6809.2	-22.86	0.000865315	0.00144874	23.9130434782609|26.6666666666667|18	0|0|0	Chr2_5865237_5865318_R_ONT.6809.2_1
Chr1:1477479-1478882	ONT.2770	Chr1:1477795-1478655	IR	3	3	-	Ex.ONT.2770.19	-22.94	0.000830951	0.000875398	20.8333333333333|20|28	0|0|0	Chr1_1477795_1478655_R_Ex.ONT.2770.19_1
Chr3:6523530-6525543	AT3G18930	Chr3:6523777-6523948	IR	3	3	-	AT3G18930.2	-23.02	0.0012502	0.00310132	17.6470588235294|24.1379310344828|27.2727272727273	0|0|0	Chr3_6523777_6523948_R_AT3G18930.2_1
Chr2:15165437-15166465	AT2G36120	Chr2:15165784-15166158	IR	3	3	-	AT2G36120.1	-23.19	3.34496e-05	5.03092e-05	21.5384615384615|22.6666666666667|25.3521126760563	0|0|0	Chr2_15165784_15166158_R_AT2G36120.1_1
Chr3:18733068-18734388	AT3G50480	Chr3:18733598-18733888	IR	3	3	-	Ex.AT3G50480.1	-23.23	8.32117e-05	0.000159443	25.8188824662813|20.8955223880597|22.9845626072041	0|0|0	Chr3_18733598_18733888_R_Ex.AT3G50480.1_1
Chr5:23405370-23406352	AT5G57780	Chr5:23406012-23406238	IR	3	3	-	ONT.19049.2	-23.26	0.00116095	0.00913032	25.8064516129032|26.3157894736842|17.6470588235294	0|0|0	Chr5_23406012_23406238_R_ONT.19049.2_1
Chr1:1477507-1478879	ONT.2770	Chr1:1477805-1478739	IR	3	3	-	Ex.ONT.2770.35	-23.68	0.00401152	0.00422391	15.7894736842105|28.5714285714286|26.6666666666667	0|0|0	Chr1_1477805_1478739_R_Ex.ONT.2770.35_1
Chr3:6523530-6525543	AT3G18930	Chr3:6523743-6523948	IR	3	3	-	AT3G18930.2	-23.8	0.000349276	0.000866495	20|24.1379310344828|27.2727272727273	0|0|0	Chr3_6523743_6523948_R_AT3G18930.2_1
Chr1:1477476-1478884	ONT.2770	Chr1:1477795-1478652	IR	3	3	-	Ex.ONT.2770.17	-23.87	0.00231389	0.00243689	20.8333333333333|20|30.7692307692308	0|0|0	Chr1_1477795_1478652_R_Ex.ONT.2770.17_1
Chr1:27119208-27119676	AT1G72070	Chr1:27119271-27119413	IR	3	3	-	ONT.4752.2	-24.78	0.000435514	0.000514814	21.2765957446809|23.8938053097345|29.1666666666667	0|0|0	Chr1_27119271_27119413_R_ONT.4752.2_1
Chr3:23425560-23426332	ONT.11977	Chr3:23425755-23425992	IR (overlapping region)	3	3	-	Ex.ONT.11977.1	-24.79	0.00780031	0.0169687	31.5789473684211|15|27.7777777777778	0|0|0	Chr3_23425755_23425992_R_Ex.ONT.11977.1_1
Chr2:18296199-18297867	AT2G44260	Chr2:18297027-18297148	IR (overlapping region)	3	3	-	AT2G44260.1	-24.82	3.72866e-06	5.96596e-06	25.9259259259259|23.5294117647059|25	0|0|0	Chr2_18297027_18297148_R_AT2G44260.1_1
Chr4:18276672-18279708	ONT.14901	Chr4:18278990-18279150	IR (overlapping region)	3	3	-	ONT.14901.1	-24.84	0.00191028	0.00701695	31.0344827586207|24.2424242424242|19.2307692307692	0|0|0	Chr4_18278990_18279150_R_ONT.14901.1_1
Chr4:18276672-18279708	ONT.14901	Chr4:18278990-18279146	IR (overlapping region)	3	3	-	ONT.14901.1	-24.84	0.00191028	0.00701695	31.0344827586207|24.2424242424242|19.2307692307692	0|0|0	Chr4_18278990_18279146_R_ONT.14901.1_1
Chr4:18276672-18279708	ONT.14901	Chr4:18278986-18279065	IR (overlapping region)	3	3	-	ONT.14901.1	-24.84	0.00191028	0.00701695	31.0344827586207|24.2424242424242|19.2307692307692	0|0|0	Chr4_18278986_18279065_R_ONT.14901.1_1
Chr1:6709783-6711787	AT1G19396	Chr1:6711528-6711607	IR (overlapping region)	3	3	-	ONT.773.2	-25.01	0.000104588	0.000132582	22|25.4545454545455|27.5862068965517	0|0|0	Chr1_6711528_6711607_R_ONT.773.2_1
Chr4:8870476-8870967	AT4G15530	Chr4:8870731-8870851	IR	3	3	-	Ex.AT4G15530.1	-25.02	0.00162947	0.00699344	20|31.25|23.8095238095238	0|0|0	Chr4_8870731_8870851_R_Ex.AT4G15530.1_1
Chr4:8870476-8870936	AT4G15530	Chr4:8870735-8870851	IR	3	3	-	Ex.AT4G15530.4	-25.02	0.00162947	0.00699344	20|31.25|23.8095238095238	0|0|0	Chr4_8870735_8870851_R_Ex.AT4G15530.4_1
Chr4:8870476-8870861	AT4G15530	Chr4:8870755-8870851	IR	3	3	-	Ex.AT4G15530.6	-25.02	0.00162947	0.00699344	20|31.25|23.8095238095238	0|0|0	Chr4_8870755_8870851_R_Ex.AT4G15530.6_1
Chr2:19279444-19281759	AT2G46920	Chr2:19281116-19281215	IR	3	3	-	ONT.8058.3	-25.17	0.00182004	0.00297188	30.4347826086957|26.3157894736842|18.75	0|0|0	Chr2_19281116_19281215_R_ONT.8058.3_1
Chr2:12585792-12586289	ONT.7325	Chr2:12585794-12585879	IR (overlapping region)	3	3	-	ONT.7325.1	-25.38	0.000128422	0.000185368	22.5806451612903|28.5714285714286|25	0|0|0	Chr2_12585794_12585879_R_ONT.7325.1_1
Chr3:4626859-4626941	AT3G13990	Chr3:4626859-4626861	A3SS	3	3	-	AT3G13990.1	-25.39	9.72572e-05	0.000227575	72|74.1935483870968|69.5652173913043	45.1612903225806|48.2758620689655|46.1538461538462	Chr3_4626859_4626941_S_AT3G13990.1_1
Chr4:16186887-16189007	AT4G33740	Chr4:16186955-16187361	IR	3	3	-	Ex.AT4G33740.1	-25.54	1.68898e-07	5.65678e-07	24.901185770751|25.6880733944954|26.0162601626016	0|0|0	Chr4_16186955_16187361_R_Ex.AT4G33740.1_1
Chr4:16186830-16189007	AT4G33740	Chr4:16186955-16187358	IR	3	3	-	Ex.AT4G33740.2	-25.54	1.68898e-07	5.65678e-07	24.901185770751|25.6880733944954|26.0162601626016	0|0|0	Chr4_16186955_16187358_R_Ex.AT4G33740.2_1
Chr1:24244376-24244991	AT1G65270	Chr1:24244537-24244794	IR	3	3	-	Ex.AT1G65270.1	-25.62	9.14674e-06	1.04808e-05	24.8031496062992|27.4261603375527|24.6428571428571	0|0|0	Chr1_24244537_24244794_R_Ex.AT1G65270.1_1
Chr1:24244376-24244964	AT1G65270	Chr1:24244537-24244800	IR	3	3	-	Ex.ONT.1959.3	-25.62	9.14674e-06	1.04808e-05	24.8031496062992|27.4261603375527|24.6428571428571	0|0|0	Chr1_24244537_24244800_R_Ex.ONT.1959.3_1
Chr1:24244376-24244743	AT1G65270	Chr1:24244537-24244645	IR	3	3	-	AT1G65270.2	-25.62	9.14674e-06	1.04808e-05	24.8031496062992|27.4261603375527|24.6428571428571	0|0|0	Chr1_24244537_24244645_R_AT1G65270.2_1
Chr5:21554844-21557535	AT5G53150	Chr5:21556007-21556093	IR	3	3	-	ONT.16634.1	-25.93	9.6791e-06	6.66761e-05	25|27.7777777777778|25	0|0|0	Chr5_21556007_21556093_R_ONT.16634.1_1
Chr1:20803704-20804573	AT1G55675	Chr1:20803961-20804551	IR	3	3	-	AT1G55675.1	-26	3.22389e-06	3.55586e-06	24.8407643312102|25.8741258741259|27.2727272727273	0|0|0	Chr1_20803961_20804551_R_AT1G55675.1_1
Chr5:21595994-21597734	AT5G53220	Chr5:21596155-21596812	IR	3	3	-	Ex.AT5G53220.3	-26.01	0.000909536	0.00627725	24|31.8181818181818|22.2222222222222	0|0|0	Chr5_21596155_21596812_R_Ex.AT5G53220.3_1
Chr4:8870287-8870730	AT4G15530	Chr4:8870383-8870475	IR	3	3	-	Ex.AT4G15530.3	-26.17	0.00135796	0.00583018	20|31.25|27.2727272727273	0|0|0	Chr4_8870383_8870475_R_Ex.AT4G15530.3_1
Chr1:2421218-2421943	AT1G07820	Chr1:2421784-2421902	IR	3	3	-	AT1G07820.1	-26.44	0.000150207	0.000171949	24.5508982035928|30.2114803625378|24.5562130177515	0|0|0	Chr1_2421784_2421902_R_AT1G07820.1_1
Chr2:17073908-17074164	AT2G40920	Chr2:17073953-17073968	IR	3	3	-	AT2G40920.1	-26.46	0.000135718	0.000211633	26.1538461538462|29.7872340425532|23.4375	0|0|0	Chr2_17073953_17073968_R_AT2G40920.1_1
Chr3:21219008-21220485	AT3G57340	Chr3:21219037-21219142	IR	3	3	-	AT3G57340.2	-26.68	0.000112708	0.000231339	28.0487804878049|28.8235294117647|23.1707317073171	0|0|0	Chr3_21219037_21219142_R_AT3G57340.2_1
Chr2:15165437-15166465	AT2G36120	Chr2:15165793-15166194	IR	3	3	-	AT2G36120.1	-26.91	0.0014933	0.00224386	31.9148936170213|20.2380952380952|28.5714285714286	0|0|0	Chr2_15165793_15166194_R_AT2G36120.1_1
Chr3:5718086-5718921	ONT.10719	Chr3:5718318-5718446	IR (overlapping region)	3	3	-	ONT.10719.1	-27.71	0.0074182	0.0177076	37.5|18.3673469387755|27.2727272727273	0|0|0	Chr3_5718318_5718446_R_ONT.10719.1_1
Chr1:5042588-5044294	AT1G14685	Chr1:5042856-5043076	IR	3	3	-	Ex.AT1G14685.2	-27.82	6.83632e-06	8.7819e-06	28.6624203821656|26|28.7958115183246	0|0|0	Chr1_5042856_5043076_R_Ex.AT1G14685.2_1
Chr5:21595994-21596711	AT5G53220	Chr5:21596155-21596235	IR	3	3	-	Ex.AT5G53220.1	-27.91	0.000161949	0.00111791	26.9230769230769|31.8181818181818|25	0|0|0	Chr5_21596155_21596235_R_Ex.AT5G53220.1_1
Chr3:5831253-5832419	AT3G17100	Chr3:5831384-5831465	IR	3	3	-	AT3G17100.1	-28.17	7.22291e-07	1.76016e-06	28.740157480315|28.6423841059603|27.1186440677966	0|0|0	Chr3_5831384_5831465_R_AT3G17100.1_1
Chr3:5200718-5201467	AT3G15395	Chr3:5200881-5200969	IR	3	3	-	ONT.8698.5	-28.73	0.000504636	0.00120553	29.1666666666667|23.6842105263158|33.3333333333333	0|0|0	Chr3_5200881_5200969_R_ONT.8698.5_1
Chr2:15165437-15166465	AT2G36120	Chr2:15165799-15166152	IR	3	3	-	AT2G36120.1	-29.22	0.000150066	0.000225566	27.7777777777778|26.5625|33.3333333333333	0|0|0	Chr2_15165799_15166152_R_AT2G36120.1_1
Chr2:15165437-15166465	AT2G36120	Chr2:15165742-15166197	IR	3	3	-	AT2G36120.1	-29.28	0.00194577	0.00292363	33.3333333333333|21.1764705882353|33.3333333333333	0|0|0	Chr2_15165742_15166197_R_AT2G36120.1_1
Chr2:11721532-11722467	ONT.7257	Chr2:11721729-11722300	IR	3	3	-	ONT.7257.2	-29.42	0.00257932	0.00367271	35.2941176470588|20.8333333333333|32.1428571428571	0|0|0	Chr2_11721729_11722300_R_ONT.7257.2_1
Chr1:21742944-21743947	ONT.4293	Chr1:21743610-21743756	IR	3	3	-	ONT.4293.2	-29.45	0.00081978	0.000912022	22.9508196721311|32.6923076923077|32.6923076923077	0|0|0	Chr1_21743610_21743756_R_ONT.4293.2_1
Chr3:17065484-17066067	ONT.11291	Chr3:17065796-17065995	IR	3	3	-	Ex.ONT.11291.2	-30.25	0.000727409	0.00135248	27.7777777777778|26.3157894736842|36.6666666666667	0|0|0	Chr3_17065796_17065995_R_Ex.ONT.11291.2_1
Chr5:22544656-22546801	AT5G55670	Chr5:22545208-22545582	IR	3	3	-	AT5G55670.1	-30.43	0.00388304	0.0288236	28.5714285714286|22.7272727272727|40	0|0|0	Chr5_22545208_22545582_R_AT5G55670.1_1
Chr1:11453714-11455181	ONT.1197	Chr1:11453750-11454511	IR (overlapping region)	3	3	-	ONT.1197.4	-30.49	0.00135503	0.0014023	35.8974358974359|23.0769230769231|32.5	0|0|0	Chr1_11453750_11454511_R_ONT.1197.4_1
Chr1:11453714-11455181	ONT.1197	Chr1:11453750-11454507	IR (overlapping region)	3	3	-	ONT.1197.4	-30.49	0.00135503	0.0014023	35.8974358974359|23.0769230769231|32.5	0|0|0	Chr1_11453750_11454507_R_ONT.1197.4_1
Chr5:654031-657003	AT5G02860	Chr5:656620-656890	IR	3	3	-	Ex.ONT.15021.2	-30.63	2.6611e-05	0.000756364	33.3333333333333|28.5714285714286|30	0|0|0	Chr5_656620_656890_R_Ex.ONT.15021.2_1
Chr1:29331355-29333092	ONT.4996	Chr1:29332452-29332544	IR (overlapping region)	3	3	-	ONT.4996.1	-31.06	0.00199715	0.00243343	28.125|39.5833333333333|25.4777070063694	0|0|0	Chr1_29332452_29332544_R_ONT.4996.1_1
Chr2:15165437-15166465	AT2G36120	Chr2:15165757-15166152	IR	3	3	-	AT2G36120.1	-31.27	0.000424946	0.000638661	29.0909090909091|27.6923076923077|37.037037037037	0|0|0	Chr2_15165757_15166152_R_AT2G36120.1_1
Chr1:2395445-2397379	ONT.265	Chr1:2396435-2396528	IR (overlapping region)	3	3	-	ONT.265.2	-31.27	2.78748e-05	3.18323e-05	29.4117647058824|34.1463414634146|30.2631578947368	0|0|0	Chr1_2396435_2396528_R_ONT.265.2_1
Chr3:17065489-17066067	ONT.11291	Chr3:17065893-17065995	IR	3	3	-	Ex.ONT.11291.3	-31.52	0.000456906	0.00084957	31.5789473684211|26.3157894736842|36.6666666666667	0|0|0	Chr3_17065893_17065995_R_Ex.ONT.11291.3_1
Chr1:21214139-21215404	ONT.4258	Chr1:21214790-21215106	IR	3	3	-	ONT.4258.1	-31.52	1.02391e-05	1.13483e-05	29.4117647058824|31.8181818181818|33.3333333333333	0|0|0	Chr1_21214790_21215106_R_ONT.4258.1_1
Chr1:27118621-27119270	AT1G72070	Chr1:27118974-27119207	IR (overlapping region)	3	3	-	Ex.AT1G72070.1	-31.7	0.000220647	0.000260832	30.188679245283|28.3333333333333|36.5671641791045	0|0|0	Chr1_27118974_27119207_R_Ex.AT1G72070.1_1
Chr2:6518888-6519921	AT2G15050	Chr2:6519247-6519878	IR	3	3	-	Ex.AT2G15050.3	-31.89	3.70283e-05	6.22947e-05	32.3529411764706|28.921568627451|34.3915343915344	0|0|0	Chr2_6519247_6519878_R_Ex.AT2G15050.3_1
Chr2:6518840-6520160	AT2G15050	Chr2:6519226-6519878	IR	3	3	-	Ex.AT2G15050.2	-31.89	3.70283e-05	6.22947e-05	32.3529411764706|28.921568627451|34.3915343915344	0|0|0	Chr2_6519226_6519878_R_Ex.AT2G15050.2_1
Chr1:21742944-21743947	ONT.4293	Chr1:21743610-21743760	IR	3	3	-	ONT.4293.2	-31.89	0.00131569	0.00146355	24.1935483870968|33.9622641509434|37.5	0|0|0	Chr1_21743610_21743760_R_ONT.4293.2_1
Chr1:23181426-23183208	AT1G62610	Chr1:23182362-23182684	IR	3	3	-	ONT.4402.1	-31.92	0.00704164	0.00796588	44.4444444444444|26.3157894736842|25	0|0|0	Chr1_23182362_23182684_R_ONT.4402.1_1
Chr1:23181426-23183208	AT1G62610	Chr1:23182359-23182684	IR	3	3	-	ONT.4402.1	-31.92	0.00704164	0.00796588	44.4444444444444|26.3157894736842|25	0|0|0	Chr1_23182359_23182684_R_ONT.4402.1_1
Chr1:23181426-23183208	AT1G62610	Chr1:23182356-23182684	IR	3	3	-	ONT.4402.1	-31.92	0.00704164	0.00796588	44.4444444444444|26.3157894736842|25	0|0|0	Chr1_23182356_23182684_R_ONT.4402.1_1
Chr3:18862058-18863228	ONT.9521	Chr3:18862738-18862822	IR (overlapping region)	3	3	-	ONT.9521.1	-32.01	0.0032765	0.00628798	42.1875|26.5625|27.2727272727273	0|0|0	Chr3_18862738_18862822_R_ONT.9521.1_1
Chr5:13857921-13858623	AT5G35680	Chr5:13858151-13858202	IR	3	3	-	AT5G35680.2	-32.17	0.000455589	0.00217757	31.6666666666667|37.6811594202899|27.1604938271605	0|0|0	Chr5_13858151_13858202_R_AT5G35680.2_1
Chr5:26399526-26400974	AT5G66010	Chr5:26399629-26400079	IR	3	3	-	ONT.17160.1	-32.38	0.00171213	0.0187828	40|25|32.1428571428571	0|0|0	Chr5_26399629_26400079_R_ONT.17160.1_1
Chr5:26399526-26400974	AT5G66010	Chr5:26399629-26400002	IR	3	3	-	ONT.17160.1	-32.38	0.00171213	0.0187828	40|25|32.1428571428571	0|0|0	Chr5_26399629_26400002_R_ONT.17160.1_1
Chr1:6969909-6970953	AT1G20100	Chr1:6970180-6970618	IR	3	3	-	ONT.3386.2	-32.62	0.000499876	0.000663642	38.4615384615385|27.5862068965517|31.8181818181818	0|0|0	Chr1_6970180_6970618_R_ONT.3386.2_1
Chr3:17065848-17066571	ONT.11291	Chr3:17066068-17066317	IR	3	3	-	Ex.ONT.11291.4	-32.84	0.00141634	0.00263327	31.5789473684211|26.3157894736842|40.625	0|0|0	Chr3_17066068_17066317_R_Ex.ONT.11291.4_1
Chr2:19319783-19320992	ONT.6572	Chr2:19320285-19320541	IR (overlapping region)	3	3	-	ONT.6572.1	-33.26	0.000913316	0.00149139	37.2093023255814|36.8421052631579|25.7142857142857	0|0|0	Chr2_19320285_19320541_R_ONT.6572.1_1
Chr1:11416510-11418274	AT1G31820	Chr1:11418166-11418266	IR	3	3	-	ONT.3780.2	-33.44	6.2376e-05	6.45595e-05	29.6296296296296|35.5555555555556|35.1351351351351	0|0|0	Chr1_11418166_11418266_R_ONT.3780.2_1
Chr1:29220380-29221734	AT1G77740	Chr1:29220575-29220594	IR	3	3	-	ONT.2461.2	-33.69	1.20804e-05	1.46902e-05	33.3333333333333|36.046511627907|31.6831683168317	0|0|0	Chr1_29220575_29220594_R_ONT.2461.2_1
Chr1:16784148-16786739	ONT.3910	Chr1:16786319-16786388	IR (overlapping region)	3	3	-	ONT.3910.1	-33.7	0.0034909	0.00369563	41.1764705882353|23.0769230769231|36.8421052631579	0|0|0	Chr1_16786319_16786388_R_ONT.3910.1_1
Chr1:29805551-29809514	ONT.5051	Chr1:29806726-29806802	IR	3	3	-	ONT.5051.3	-33.82	7.91377e-05	9.70434e-05	37.8378378378378|32.5|31.1111111111111	0|0|0	Chr1_29806726_29806802_R_ONT.5051.3_1
Chr1:28484844-28485955	AT1G75860	Chr1:28485163-28485662	IR	3	3	-	ONT.4902.2	-34.05	0.00177491	0.00213462	37.1428571428571|40|25	0|0|0	Chr1_28485163_28485662_R_ONT.4902.2_1
Chr1:29805551-29806725	ONT.5051	Chr1:29806575-29806660	IR	3	3	-	ONT.5051.1	-34.32	4.0933e-05	5.01961e-05	37.8378378378378|32.5|32.6086956521739	0|0|0	Chr1_29806575_29806660_R_ONT.5051.1_1
Chr2:1877685-1878219	AT2G05185	Chr2:1877798-1877970	IR	3	3	-	AT2G05185.1	-34.43	1.8838e-05	3.04798e-05	36.8421052631579|34.6153846153846|31.8181818181818	0|0|0	Chr2_1877798_1877970_R_AT2G05185.1_1
Chr2:1877685-1878219	AT2G05185	Chr2:1877798-1877937	IR	3	3	-	AT2G05185.1	-34.43	1.8838e-05	3.04798e-05	36.8421052631579|34.6153846153846|31.8181818181818	0|0|0	Chr2_1877798_1877937_R_AT2G05185.1_1
ChrM:146328-288108	ATMG01120	ChrM:147049-287916	IR	3	3	-	Ex.ONT.19567.1	-35.14	0.00981047	1	50|30.4347826086957|25	0|0|0	ChrM_147049_287916_R_Ex.ONT.19567.1_1
Chr1:13078138-13079766	AT1G35515	Chr1:13078268-13079304	IR	3	3	-	ONT.1310.1	-35.49	6.95752e-05	7.27732e-05	31.3253012048193|37.7049180327869|37.4331550802139	0|0|0	Chr1_13078268_13079304_R_ONT.1310.1_1
Chr1:6726685-6728040	AT1G19430	Chr1:6727739-6727815	IR	3	3	-	AT1G19430.1	-35.81	0.000603542	0.00076488	43.0769230769231|31.5789473684211|32.7868852459016	0|0|0	Chr1_6727739_6727815_R_AT1G19430.1_1
Chr5:4691378-4691896	AT5G14550	Chr5:4691593-4691746	IR (overlapping region)	3	3	-	AT5G14550.2	-36.09	2.82395e-06	5.11246e-05	35|37.9746835443038|35.2941176470588	0|0|0	Chr5_4691593_4691746_R_AT5G14550.2_1
Chr1:28041723-28042989	AT1G74650	Chr1:28041853-28042043	IR	3	3	-	ONT.2341.3	-36.2	0.0041709	0.00498974	48|27.2727272727273|33.3333333333333	0|0|0	Chr1_28041853_28042043_R_ONT.2341.3_1
Chr2:15165437-15166465	AT2G36120	Chr2:15165619-15166119	IR	3	3	-	AT2G36120.1	-36.41	0.000921886	0.00138541	43.421052631579|29.0909090909091|36.7088607594937	0|0|0	Chr2_15165619_15166119_R_AT2G36120.1_1
Chr2:15165437-15166465	AT2G36120	Chr2:15165619-15166116	IR	3	3	-	AT2G36120.1	-36.45	0.00111509	0.00167569	43.421052631579|28.4403669724771|37.5	0|0|0	Chr2_15165619_15166116_R_AT2G36120.1_1
Chr1:18175032-18176022	AT1G49130	Chr1:18175799-18175902	IR	3	3	-	AT1G49130.2	-36.49	3.51571e-05	3.75664e-05	39.8230088495575|33.6363636363636|36	0|0|0	Chr1_18175799_18175902_R_AT1G49130.2_1
Chr2:10125368-10127521	AT2G23790	Chr2:10126151-10126903	IR	3	3	-	Ex.AT2G23790.1	-36.75	8.67841e-06	1.20387e-05	36.7816091954023|34.5238095238095|38.9473684210526	0|0|0	Chr2_10126151_10126903_R_Ex.AT2G23790.1_1
Chr3:9710756-9711460	AT3G26510	Chr3:9711339-9711399	IR	3	3	-	ONT.11068.3	-36.79	0.000181004	0.000481303	38.2022471910112|31.4814814814815|40.6976744186046	0|0|0	Chr3_9711339_9711399_R_ONT.11068.3_1
Chr2:7995739-7997192	ONT.6921	Chr2:7995975-7996356	IR	3	3	-	ONT.6921.3	-37.39	0.00104142	0.00178705	34.7826086956522|45.945945945946|31.4285714285714	0|0|0	Chr2_7995975_7996356_R_ONT.6921.3_1
Chr2:6518843-6520619	AT2G15050	Chr2:6519226-6520241	IR	3	3	-	Ex.ONT.5344.4	-37.42	4.08112e-06	6.86652e-06	37.6923076923077|35.4330708661417|39.1304347826087	0|0|0	Chr2_6519226_6520241_R_Ex.ONT.5344.4_1
Chr1:4758851-4759901	ONT.3130	Chr1:4759203-4759622	IR (overlapping region)	3	3	-	ONT.3130.1	-38.26	2.90516e-05	3.71714e-05	41.8181818181818|36.9565217391304|36	0|0|0	Chr1_4759203_4759622_R_ONT.3130.1_1
Chr3:19323346-19324469	AT3G52105	Chr3:19323614-19324168	IR	3	3	-	Ex.ONT.9587.3	-38.29	2.6611e-05	5.17833e-05	41.6666666666667|37.5|35.7142857142857	0|0|0	Chr3_19323614_19324168_R_Ex.ONT.9587.3_1
Chr1:13078138-13079766	AT1G35515	Chr1:13078930-13079304	IR (overlapping region)	3	3	-	ONT.1310.1	-38.44	6.23495e-05	6.52172e-05	34.1040462427746|40|41.2060301507538	0|0|0	Chr1_13078930_13079304_R_ONT.1310.1_1
Chr1:13078138-13079766	AT1G35515	Chr1:13078916-13079304	IR (overlapping region)	3	3	-	ONT.1310.1	-38.44	6.23495e-05	6.52172e-05	34.1040462427746|40|41.2060301507538	0|0|0	Chr1_13078916_13079304_R_ONT.1310.1_1
Chr3:9686098-9687642	AT3G26470	Chr3:9686552-9686642	IR	3	3	-	Ex.AT3G26470.1	-39	8.74114e-05	0.000232584	43.1818181818182|39.0243902439024|34.7826086956522	0|0|0	Chr3_9686552_9686642_R_Ex.AT3G26470.1_1
Chr2:15165437-15166465	AT2G36120	Chr2:15165709-15166158	IR	3	3	-	AT2G36120.1	-39.14	3.28134e-05	4.93544e-05	35.4430379746835|40.2061855670103|41.7582417582418	0|0|0	Chr2_15165709_15166158_R_AT2G36120.1_1
Chr4:13361967-13364393	AT4G26450	Chr4:13362276-13362547	IR	3	3	-	Ex.ONT.12875.4	-39.49	2.50159e-06	7.43278e-06	40.7407407407407|37.5|40.2173913043478	0|0|0	Chr4_13362276_13362547_R_Ex.ONT.12875.4_1
Chr4:13361964-13364393	AT4G26450	Chr4:13362432-13362547	IR	3	3	-	Ex.ONT.12875.3	-39.49	2.50159e-06	7.43278e-06	40.7407407407407|37.5|40.2173913043478	0|0|0	Chr4_13362432_13362547_R_Ex.ONT.12875.3_1
Chr2:15165437-15166465	AT2G36120	Chr2:15165699-15166158	IR	3	3	-	AT2G36120.1	-40.53	9.07238e-05	0.000136396	35.4430379746835|43.1372549019608|43.010752688172	0|0|0	Chr2_15165699_15166158_R_AT2G36120.1_1
Chr1:18132683-18133923	AT1G49010	Chr1:18133139-18133258	IR	3	3	-	ONT.1449.2	-40.66	8.32439e-05	8.89227e-05	38.8888888888889|45.5882352941176|37.5	0|0|0	Chr1_18133139_18133258_R_ONT.1449.2_1
Chr2:10125368-10127526	AT2G23790	Chr2:10126661-10126903	IR	3	3	-	Ex.ONT.7114.3	-40.97	8.09428e-06	1.12288e-05	42.7083333333333|38.2022471910112|42	0|0|0	Chr2_10126661_10126903_R_Ex.ONT.7114.3_1
ChrC:84337-85843	ATCG00830	ChrC:84772-85453	IR	3	3	-	Ex.ATCG00830.1	-41.73	0.00046165	1	49.0909090909091|40.625|35.4838709677419	0|0|0	ChrC_84772_85453_R_Ex.ATCG00830.1_1
ChrC:83946-85900	ATCG00830	ChrC:84771-85452	IR	3	3	-	Ex.ONT.19541.6	-41.73	0.00046165	1	49.0909090909091|40.625|35.4838709677419	0|0|0	ChrC_84771_85452_R_Ex.ONT.19541.6_1
Chr2:19319783-19320992	ONT.6572	Chr2:19320285-19320362	IR (overlapping region)	3	3	-	ONT.6572.1	-42.72	0.000201871	0.000329659	43.75|47.8260869565217|36.5853658536585	0|0|0	Chr2_19320285_19320362_R_ONT.6572.1_1
Chr1:25598170-25598438	AT1G68290	Chr1:25598321-25598411	IR (overlapping region)	3	3	-	AT1G68290.1	-42.84	0.000146351	0.000170116	46.6666666666667|36.8421052631579|45	0|0|0	Chr1_25598321_25598411_R_AT1G68290.1_1
Chr4:16187056-16187676	AT4G33740	Chr4:16187197-16187361	IR	3	3	-	Ex.ONT.13184.5	-43.26	5.36951e-06	1.79804e-05	40.5940594059406|44.5086705202312|44.6700507614213	0|0|0	Chr4_16187197_16187361_R_Ex.ONT.13184.5_1
Chr5:19005601-19006277	AT5G46840	Chr5:19005680-19005737	IR	3	3	-	AT5G46840.1	-43.87	5.47554e-05	0.000318354	40|48.3333333333333|43.2835820895522	0|0|0	Chr5_19005680_19005737_R_AT5G46840.1_1
Chr2:15165437-15166465	AT2G36120	Chr2:15165646-15166154	IR	3	3	-	AT2G36120.1	-44.07	2.82018e-06	4.24511e-06	45.1612903225806|45.2830188679245|41.7582417582418	0|0|0	Chr2_15165646_15166154_R_AT2G36120.1_1
Chr2:16539388-16540436	ONT.7753	Chr2:16539672-16540239	IR	3	3	-	ONT.7753.2	-44.81	8.07806e-06	1.24733e-05	42.8571428571429|47.8260869565217|43.75	0|0|0	Chr2_16539672_16540239_R_ONT.7753.2_1
Chr2:15165437-15166465	AT2G36120	Chr2:15165595-15166158	IR	3	3	-	AT2G36120.1	-45.04	1.60929e-06	2.42299e-06	46.3157894736842|45.7943925233645|43.010752688172	0|0|0	Chr2_15165595_15166158_R_AT2G36120.1_1
Chr3:10576513-10577248	AT3G28310	Chr3:10576581-10576949	IR (overlapping region)	3	3	-	Ex.ONT.9232.2	-45.1	0.000506345	0.000905048	52.3809523809524|37.2093023255814|45.7142857142857	0|0|0	Chr3_10576581_10576949_R_Ex.ONT.9232.2_1
Chr5:25737204-25738602	AT5G64360	Chr5:25737609-25737734	IR	3	3	-	AT5G64360.2	-45.29	0.000808226	0.00794201	44.7368421052632|36.9565217391304|54.1666666666667	0|0|0	Chr5_25737609_25737734_R_AT5G64360.2_1
Chr4:10477295-10477887	AT4G19160	Chr4:10477531-10477820	IR	3	3	-	ONT.12597.3	-45.37	3.06016e-07	8.3282e-07	46.7289719626168|44.7811447811448|44.5969125214408	0|0|0	Chr4_10477531_10477820_R_ONT.12597.3_1
Chr2:17946468-17947012	AT2G43150	Chr2:17946568-17946650	IR	3	3	-	Ex.ONT.6395.1	-45.43	3.74663e-08	5.93118e-08	44.6825396825397|46.070460704607|45.5291222313372	0|0|0	Chr2_17946568_17946650_R_Ex.ONT.6395.1_1
Chr2:15165437-15166465	AT2G36120	Chr2:15165625-15166119	IR	3	3	-	AT2G36120.1	-45.6	1.28727e-05	1.93689e-05	47.1428571428571|42.1052631578947|47.5409836065574	0|0|0	Chr2_15165625_15166119_R_AT2G36120.1_1
Chr2:17945893-17946567	AT2G43150	Chr2:17946015-17946468	IR	3	3	-	AT2G43150.1	-45.71	1.06239e-07	1.68177e-07	44.6825396825397|46.4333781965007|46.0097719869707	0|0|0	Chr2_17946015_17946468_R_AT2G43150.1_1
Chr1:11410793-11412153	AT1G31812	Chr1:11411394-11411504	IR	3	3	-	ONT.3777.3	-45.79	0.000719867	0.000745046	40.9090909090909|40.9090909090909|55.5555555555556	0|0|0	Chr1_11411394_11411504_R_ONT.3777.3_1
Chr2:15165437-15166465	AT2G36120	Chr2:15165709-15166149	IR	3	3	-	AT2G36120.1	-46.19	8.06146e-05	0.000121202	41.7910447761194|45.3488372093023|51.4285714285714	0|0|0	Chr2_15165709_15166149_R_AT2G36120.1_1
Chr2:15165437-15166465	AT2G36120	Chr2:15165601-15166163	IR	3	3	-	AT2G36120.1	-46.26	9.8665e-06	1.48462e-05	48.4848484848485|47.2727272727273|43.010752688172	0|0|0	Chr2_15165601_15166163_R_AT2G36120.1_1
Chr2:15165437-15166465	AT2G36120	Chr2:15165696-15166149	IR	3	3	-	AT2G36120.1	-46.8	7.38801e-05	0.000111082	41.7910447761194|47.1910112359551|51.4285714285714	0|0|0	Chr2_15165696_15166149_R_AT2G36120.1_1
Chr3:20827979-20829140	ONT.11692	Chr3:20828557-20828690	IR (overlapping region)	3	3	-	ONT.11692.1	-46.86	7.93436e-05	0.000161067	51.1111111111111|48|41.4634146341463	0|0|0	Chr3_20828557_20828690_R_ONT.11692.1_1
Chr5:18589944-18591482	AT5G45830	Chr5:18590656-18591009	IR (overlapping region)	3	3	-	Ex.ONT.18624.1	-46.87	0.00694785	0.0395264	62.1621621621622|48|30.4347826086957	0|0|0	Chr5_18590656_18591009_R_Ex.ONT.18624.1_1
Chr2:2327635-2329691	AT2G06000	Chr2:2327694-2327890	IR	3	3	-	AT2G06000.1	-47.16	0.00166011	0.0027573	37.9310344827586|44.4444444444444|59.0909090909091	0|0|0	Chr2_2327694_2327890_R_AT2G06000.1_1
Chr2:15165437-15166465	AT2G36120	Chr2:15165617-15166187	IR	3	3	-	AT2G36120.1	-47.63	9.71489e-05	0.000146037	52.7472527472528|42.2222222222222|47.9166666666667	0|0|0	Chr2_15165617_15166187_R_AT2G36120.1_1
Chr2:15165437-15166465	AT2G36120	Chr2:15165615-15166187	IR	3	3	-	AT2G36120.1	-47.63	9.71489e-05	0.000146037	52.7472527472528|42.2222222222222|47.9166666666667	0|0|0	Chr2_15165615_15166187_R_AT2G36120.1_1
Chr2:15165437-15166465	AT2G36120	Chr2:15165619-15166192	IR	3	3	-	AT2G36120.1	-47.77	6.7739e-05	0.000101852	52.2222222222222|42.6470588235294|48.4536082474227	0|0|0	Chr2_15165619_15166192_R_AT2G36120.1_1
Chr2:15165437-15166465	AT2G36120	Chr2:15165682-15166197	IR	3	3	-	AT2G36120.1	-48.2	0.000100573	0.000151179	48.3870967741936|42.7350427350427|53.4883720930233	0|0|0	Chr2_15165682_15166197_R_AT2G36120.1_1
Chr2:15165437-15166465	AT2G36120	Chr2:15165628-15166137	IR	3	3	-	AT2G36120.1	-48.35	6.19655e-05	9.31752e-05	50.6666666666667|42.8571428571429|51.5151515151515	0|0|0	Chr2_15165628_15166137_R_AT2G36120.1_1
Chr2:15165437-15166465	AT2G36120	Chr2:15165619-15166194	IR	3	3	-	AT2G36120.1	-48.67	3.09466e-05	4.65485e-05	52.2222222222222|44.2857142857143|49.4949494949495	0|0|0	Chr2_15165619_15166194_R_AT2G36120.1_1
Chr2:15165437-15166465	AT2G36120	Chr2:15165518-15166158	IR	3	3	-	AT2G36120.1	-48.71	4.42931e-06	6.66591e-06	46.3157894736842|51.2605042016807|48.5436893203884	0|0|0	Chr2_15165518_15166158_R_AT2G36120.1_1
Chr2:15165437-15166465	AT2G36120	Chr2:15165685-15166149	IR	3	3	-	AT2G36120.1	-48.87	2.979e-06	4.48399e-06	48|47.1910112359551|51.4285714285714	0|0|0	Chr2_15165685_15166149_R_AT2G36120.1_1
Chr2:15165437-15166465	AT2G36120	Chr2:15165676-15166149	IR	3	3	-	AT2G36120.1	-49.1	2.43733e-06	3.66913e-06	48.6842105263158|47.1910112359551|51.4285714285714	0|0|0	Chr2_15165676_15166149_R_AT2G36120.1_1
Chr2:15165437-15166465	AT2G36120	Chr2:15165658-15166149	IR	3	3	-	AT2G36120.1	-49.32	2.26135e-06	3.40435e-06	49.3506493506493|47.1910112359551|51.4285714285714	0|0|0	Chr2_15165658_15166149_R_AT2G36120.1_1
Chr1:109032-111609	AT1G01260	Chr1:109331-109412	IR	3	3	-	AT1G01260.1	-49.43	1.28602e-05	1.32618e-05	51.6129032258064|45.6521739130435|51.0204081632653	0|0|0	Chr1_109331_109412_R_AT1G01260.1_1
Chr1:109032-111609	AT1G01260	Chr1:109331-109405	IR	3	3	-	AT1G01260.1	-49.43	1.28602e-05	1.32618e-05	51.6129032258064|45.6521739130435|51.0204081632653	0|0|0	Chr1_109331_109405_R_AT1G01260.1_1
Chr1:30358185-30359373	AT1G80780	Chr1:30358296-30358394	IR	3	3	-	Ex.ONT.2589.2	-49.54	2.82353e-05	3.50981e-05	52.3917995444191|44.954128440367|51.2761020881671	0|0|0	Chr1_30358296_30358394_R_Ex.ONT.2589.2_1
Chr1:30358184-30359373	AT1G80780	Chr1:30358296-30358378	IR	3	3	-	Ex.AT1G80780.1	-49.54	2.82353e-05	3.50981e-05	52.3917995444191|44.954128440367|51.2761020881671	0|0|0	Chr1_30358296_30358378_R_Ex.AT1G80780.1_1
Chr2:18866061-18867160	AT2G45830	Chr2:18866504-18866606	IR (overlapping region)	3	3	-	AT2G45830.2	-49.75	0.00113348	0.00183824	57.1428571428571|37.9310344827586|54.1666666666667	0|0|0	Chr2_18866504_18866606_R_AT2G45830.2_1
Chr2:15165437-15166465	AT2G36120	Chr2:15165619-15166196	IR	3	3	-	AT2G36120.1	-49.76	7.56286e-06	1.13808e-05	52.2222222222222|46.5753424657534|50.4950495049505	0|0|0	Chr2_15165619_15166196_R_AT2G36120.1_1
Chr2:15165437-15166465	AT2G36120	Chr2:15165685-15166152	IR	3	3	-	AT2G36120.1	-49.9	4.42515e-06	6.65992e-06	48|48.9130434782609|52.7777777777778	0|0|0	Chr2_15165685_15166152_R_AT2G36120.1_1
Chr2:15165437-15166465	AT2G36120	Chr2:15165637-15166149	IR	3	3	-	AT2G36120.1	-49.96	3.51363e-06	5.28828e-06	51.25|47.1910112359551|51.4285714285714	0|0|0	Chr2_15165637_15166149_R_AT2G36120.1_1
Chr2:15165437-15166465	AT2G36120	Chr2:15165628-15166149	IR	3	3	-	AT2G36120.1	-49.96	3.51363e-06	5.28828e-06	51.25|47.1910112359551|51.4285714285714	0|0|0	Chr2_15165628_15166149_R_AT2G36120.1_1
Chr2:15165437-15166465	AT2G36120	Chr2:15165628-15166143	IR	3	3	-	AT2G36120.1	-50.21	2.88413e-05	4.33853e-05	51.3157894736842|45.679012345679|53.6231884057971	0|0|0	Chr2_15165628_15166143_R_AT2G36120.1_1
Chr2:15165437-15166465	AT2G36120	Chr2:15165658-15166152	IR	3	3	-	AT2G36120.1	-50.35	2.07315e-06	3.12115e-06	49.3506493506493|48.9130434782609|52.7777777777778	0|0|0	Chr2_15165658_15166152_R_AT2G36120.1_1
Chr2:8969417-8970630	AT2G20830	Chr2:8969812-8970017	IR	3	3	-	AT2G20830.1	-50.36	9.36706e-05	0.000163012	44|53.2467532467532|53.8461538461538	0|0|0	Chr2_8969812_8970017_R_AT2G20830.1_1
Chr2:15165437-15166465	AT2G36120	Chr2:15165628-15166146	IR	3	3	-	AT2G36120.1	-50.62	1.89397e-05	2.84941e-05	52.5641025641026|46.3414634146341|52.9411764705882	0|0|0	Chr2_15165628_15166146_R_AT2G36120.1_1
Chr2:15165437-15166465	AT2G36120	Chr2:15165625-15166146	IR	3	3	-	AT2G36120.1	-50.62	1.89397e-05	2.84941e-05	52.5641025641026|46.3414634146341|52.9411764705882	0|0|0	Chr2_15165625_15166146_R_AT2G36120.1_1
Chr1:2444066-2444549	AT1G07920	Chr1:2444156-2444433	IR (overlapping region)	3	3	-	Ex.ONT.272.4	-50.75	0.00043644	0.000500925	41.304347826087|54.5454545454545|56.4102564102564	0|0|0	Chr1_2444156_2444433_R_Ex.ONT.272.4_1
Chr2:15165437-15166465	AT2G36120	Chr2:15165646-15166151	IR	3	3	-	AT2G36120.1	-50.79	2.54744e-06	3.83473e-06	51.25|48.3516483516484|52.7777777777778	0|0|0	Chr2_15165646_15166151_R_AT2G36120.1_1
Chr2:15165437-15166465	AT2G36120	Chr2:15165676-15166191	IR	3	3	-	AT2G36120.1	-50.8	3.04819e-05	4.58514e-05	52.9411764705882|45.9677419354839|53.4883720930233	0|0|0	Chr2_15165676_15166191_R_AT2G36120.1_1
Chr2:15165437-15166465	AT2G36120	Chr2:15165625-15166152	IR	3	3	-	AT2G36120.1	-51.18	1.60519e-06	2.41693e-06	51.8518518518518|48.9130434782609|52.7777777777778	0|0|0	Chr2_15165625_15166152_R_AT2G36120.1_1
Chr2:15165437-15166465	AT2G36120	Chr2:15165592-15166152	IR	3	3	-	AT2G36120.1	-51.18	1.60519e-06	2.41693e-06	51.8518518518518|48.9130434782609|52.7777777777778	0|0|0	Chr2_15165592_15166152_R_AT2G36120.1_1
ChrC:11529-12798	ATCG00130	ChrC:11939-12653	IR	3	3	-	Ex.ATCG00130.1	-51.94	1.31335e-05	0.120667	50.7194244604317|49.2395437262357|55.8490566037736	0|0|0	ChrC_11939_12653_R_Ex.ATCG00130.1_1
ChrM:40502-42628	ATMG00160	ChrM:40586-41929	IR	3	3	-	Ex.ATMG00160.1	-52.28	0.000279192	1	50.9803921568627|60.4166666666667|45.4545454545455	0|0|0	ChrM_40586_41929_R_Ex.ATMG00160.1_1
ChrM:40313-42782	ATMG00160	ChrM:40585-41928	IR	3	3	-	Ex.ONT.19566.2	-52.28	0.000279192	1	50.9803921568627|60.4166666666667|45.4545454545455	0|0|0	ChrM_40585_41928_R_Ex.ONT.19566.2_1
Chr5:7513919-7514453	AT5G22608	Chr5:7514032-7514204	IR	3	3	-	AT5G22608.1	-52.71	2.82113e-06	0.000112818	53.5714285714286|54.5454545454545|50	0|0|0	Chr5_7514032_7514204_R_AT5G22608.1_1
Chr5:7513919-7514453	AT5G22608	Chr5:7514032-7514171	IR	3	3	-	AT5G22608.1	-52.71	2.82113e-06	0.000112818	53.5714285714286|54.5454545454545|50	0|0|0	Chr5_7514032_7514171_R_AT5G22608.1_1
Chr5:7513529-7514453	AT5G22608	Chr5:7513642-7513918	IR	3	3	-	ONT.15782.2	-52.71	2.82113e-06	0.000112818	53.5714285714286|54.5454545454545|50	0|0|0	Chr5_7513642_7513918_R_ONT.15782.2_1
Chr1:29331355-29333092	ONT.4996	Chr1:29332622-29332733	IR (overlapping region)	3	3	-	ONT.4996.1	-52.75	0.000199705	0.000243339	50|60.7142857142857|47.5336322869955	0|0|0	Chr1_29332622_29332733_R_ONT.4996.1_1
Chr2:18866061-18867160	AT2G45830	Chr2:18866229-18866313	IR (overlapping region)	3	3	-	AT2G45830.2	-52.87	5.39032e-05	8.74265e-05	55.5555555555556|47.0588235294118|56	0|0|0	Chr2_18866229_18866313_R_AT2G45830.2_1
Chr2:1382574-1383499	ONT.6732	Chr2:1382858-1383047	IR	3	3	-	ONT.6732.2	-53.07	3.54876e-05	5.22707e-05	58.0645161290323|49.1525423728814|52	0|0|0	Chr2_1382858_1383047_R_ONT.6732.2_1
ChrC:43496-45978	ATCG00360	ChrC:43754-44467	IR	3	3	-	Ex.ONT.19529.1	-53.98	1.76313e-05	0.129593	58.2089552238806|53.1645569620253|50.5747126436782	0|0|0	ChrC_43754_44467_R_Ex.ONT.19529.1_1
Chr2:15165437-15166465	AT2G36120	Chr2:15165601-15166194	IR	3	3	-	AT2G36120.1	-54.37	9.61241e-05	0.000144509	60|48.062015503876|55.0561797752809	0|0|0	Chr2_15165601_15166194_R_AT2G36120.1_1
Chr2:15165437-15166465	AT2G36120	Chr2:15165625-15166197	IR	3	3	-	AT2G36120.1	-54.58	9.12201e-06	1.37265e-05	56.4705882352941|50.7352941176471|56.5217391304348	0|0|0	Chr2_15165625_15166197_R_AT2G36120.1_1
Chr2:15165437-15166465	AT2G36120	Chr2:15165511-15166152	IR	3	3	-	AT2G36120.1	-56.5	2.00092e-05	3.01018e-05	51.8518518518518|57.6576576576577|60	0|0|0	Chr2_15165511_15166152_R_AT2G36120.1_1
Chr3:2296092-2296625	ONT.10312	Chr3:2296386-2296528	IR	3	3	-	Ex.ONT.10312.3	-57.17	0.000257105	0.000552211	50|55.5555555555556|65.9574468085106	0|0|0	Chr3_2296386_2296528_R_Ex.ONT.10312.3_1
ChrM:163625-167642	ATMG00580	ChrM:164140-167220	IR (overlapping region)	3	3	-	Ex.ATMG00580.1	-57.2	4.02368e-06	0.0739371	55.3191489361702|60.4651162790698|55.8139534883721	0|0|0	ChrM_164140_167220_R_Ex.ATMG00580.1_1
Chr5:13414751-13415073	AT5G35160	Chr5:13414784-13414942	IR	3	3	-	Ex.AT5G35160.1	-57.67	5.17488e-06	2.41962e-05	54.6511627906977|57.6086956521739|60.7476635514019	0|0|0	Chr5_13414784_13414942_R_Ex.AT5G35160.1_1
Chr3:21468314-21469292	ONT.9823	Chr3:21468767-21468852	IR (overlapping region)	3	3	-	ONT.9823.1	-58.02	0.00357039	0.0073791	39.2857142857143|65.2173913043478|69.5652173913043	0|0|0	Chr3_21468767_21468852_R_ONT.9823.1_1
Chr3:2296529-2297735	ONT.10312	Chr3:2296626-2296708	IR	3	3	-	Ex.ONT.10312.1	-58.18	0.000176246	0.000378564	51.0204081632653|57.5757575757576|65.9574468085106	0|0|0	Chr3_2296626_2296708_R_Ex.ONT.10312.1_1
Chr3:2296529-2296814	ONT.10312	Chr3:2296568-2296708	IR	3	3	-	Ex.ONT.10312.4	-58.6	0.000169941	0.000365041	51.0204081632653|58.8235294117647|65.9574468085106	0|0|0	Chr3_2296568_2296708_R_Ex.ONT.10312.4_1
Chr2:13863724-13864597	AT2G32690	Chr2:13864026-13864217	IR	3	3	-	Ex.ONT.7457.11	-59.04	6.34067e-05	9.34459e-05	61.3333333333333|52.3809523809524|63.4146341463415	0|0|0	Chr2_13864026_13864217_R_Ex.ONT.7457.11_1
Chr2:13863732-13864600	AT2G32690	Chr2:13864026-13864361	IR	3	3	-	Ex.ONT.7457.46	-59.46	1.79507e-05	2.64751e-05	61.3333333333333|54.5454545454545|62.5	0|0|0	Chr2_13864026_13864361_R_Ex.ONT.7457.46_1
Chr2:13863730-13864600	AT2G32690	Chr2:13864029-13864322	IR	3	3	-	Ex.ONT.7457.40	-59.46	1.79507e-05	2.64751e-05	61.3333333333333|54.5454545454545|62.5	0|0|0	Chr2_13864029_13864322_R_Ex.ONT.7457.40_1
Chr2:13863729-13864600	AT2G32690	Chr2:13864029-13864361	IR	3	3	-	Ex.ONT.7457.31	-59.46	1.79507e-05	2.64751e-05	61.3333333333333|54.5454545454545|62.5	0|0|0	Chr2_13864029_13864361_R_Ex.ONT.7457.31_1
Chr2:13863726-13864588	AT2G32690	Chr2:13864023-13864317	IR	3	3	-	Ex.ONT.7457.22	-59.46	1.79507e-05	2.64751e-05	61.3333333333333|54.5454545454545|62.5	0|0|0	Chr2_13864023_13864317_R_Ex.ONT.7457.22_1
Chr2:13863725-13864600	AT2G32690	Chr2:13864026-13864322	IR	3	3	-	Ex.ONT.7457.21	-59.46	1.79507e-05	2.64751e-05	61.3333333333333|54.5454545454545|62.5	0|0|0	Chr2_13864026_13864322_R_Ex.ONT.7457.21_1
Chr2:13863724-13864591	AT2G32690	Chr2:13864026-13864346	IR	3	3	-	Ex.ONT.7457.7	-59.46	1.79507e-05	2.64751e-05	61.3333333333333|54.5454545454545|62.5	0|0|0	Chr2_13864026_13864346_R_Ex.ONT.7457.7_1
Chr2:13863724-13864600	AT2G32690	Chr2:13864026-13864367	IR	3	3	-	Ex.ONT.7457.16	-59.63	1.9792e-05	2.91896e-05	61.8421052631579|54.5454545454545|62.5	0|0|0	Chr2_13864026_13864367_R_Ex.ONT.7457.16_1
Chr2:13863724-13864595	AT2G32690	Chr2:13864029-13864289	IR	3	3	-	Ex.ONT.7457.10	-59.79	2.19982e-05	3.24394e-05	62.3376623376623|54.5454545454545|62.5	0|0|0	Chr2_13864029_13864289_R_Ex.ONT.7457.10_1
Chr2:13863722-13864600	AT2G32690	Chr2:13864024-13864299	IR	3	3	-	Ex.ONT.7457.5	-59.79	2.19982e-05	3.24394e-05	62.3376623376623|54.5454545454545|62.5	0|0|0	Chr2_13864024_13864299_R_Ex.ONT.7457.5_1
Chr3:19053440-19053995	ONT.9549	Chr3:19053862-19053969	IR (overlapping region)	3	3	-	ONT.9549.1	-59.86	8.16877e-05	0.000157187	61.3636363636364|65.3153153153153|52.9100529100529	0|0|0	Chr3_19053862_19053969_R_ONT.9549.1_1
Chr2:13863730-13864597	AT2G32690	Chr2:13864026-13864289	IR	3	3	-	Ex.ONT.7457.36	-59.95	2.46328e-05	3.63231e-05	62.3376623376623|54.5454545454545|62.962962962963	0|0|0	Chr2_13864026_13864289_R_Ex.ONT.7457.36_1
ChrM:167221-169674	ATMG00580	ChrM:167643-169584	IR (overlapping region)	3	3	-	Ex.ATMG00580.1	-59.96	9.51523e-06	0.116565	63.6363636363636|60|56.25	0|0|0	ChrM_167643_169584_R_Ex.ATMG00580.1_1
Chr3:19053440-19053995	ONT.9549	Chr3:19053713-19053789	IR (overlapping region)	3	3	-	ONT.9549.1	-60.21	7.21064e-05	0.000138757	61.5384615384615|65.6108597285068|53.475935828877	0|0|0	Chr3_19053713_19053789_R_ONT.9549.1_1
Chr2:13863724-13864600	AT2G32690	Chr2:13864026-13864265	IR	3	3	-	Ex.ONT.7457.17	-60.25	3.10251e-05	4.57398e-05	62.3376623376623|54.5454545454545|63.855421686747	0|0|0	Chr2_13864026_13864265_R_Ex.ONT.7457.17_1
Chr3:2296709-2297735	ONT.10312	Chr3:2296815-2297716	IR	3	3	-	ONT.10312.1	-60.79	0.000107534	0.000231015	53.1914893617021|62.5|66.6666666666667	0|0|0	Chr3_2296815_2297716_R_ONT.10312.1_1
Chr2:8969417-8970630	AT2G20830	Chr2:8969812-8970090	IR	3	3	-	AT2G20830.1	-61.54	2.9142e-05	5.07197e-05	55.7894736842105|65.0485436893204|63.7931034482759	0|0|0	Chr2_8969812_8970090_R_AT2G20830.1_1
Chr3:2409931-2411294	AT3G07550	Chr3:2410284-2410439	IR	3	3	-	AT3G07550.1	-62	3.42619e-06	7.47497e-06	65|61.9047619047619|59.0909090909091	0|0|0	Chr3_2410284_2410439_R_AT3G07550.1_1
Chr3:2409727-2411294	AT3G07550	Chr3:2409821-2409930	IR	3	3	-	AT3G07550.2	-62	3.42619e-06	7.47497e-06	65|61.9047619047619|59.0909090909091	0|0|0	Chr3_2409821_2409930_R_AT3G07550.2_1
Chr2:15165437-15166465	AT2G36120	Chr2:15165707-15166181	IR	3	3	-	AT2G36120.1	-62.17	0.000169326	0.000254505	54|62.7118644067797|69.811320754717	0|0|0	Chr2_15165707_15166181_R_AT2G36120.1_1
Chr2:13863730-13864597	AT2G32690	Chr2:13864119-13864250	IR	3	3	-	Ex.ONT.7457.37	-63.15	5.65699e-05	8.33734e-05	66.1764705882353|56.140350877193|67.1428571428571	0|0|0	Chr2_13864119_13864250_R_Ex.ONT.7457.37_1
Chr2:13863724-13864597	AT2G32690	Chr2:13864011-13864289	IR	3	3	-	Ex.ONT.7457.12	-63.19	2.47042e-05	3.64269e-05	64.8648648648649|57.6271186440678|67.0886075949367	0|0|0	Chr2_13864011_13864289_R_Ex.ONT.7457.12_1
Chr2:17948798-17949073	AT2G43160	Chr2:17948919-17949021	IR	3	3	-	Ex.AT2G43160.1	-63.21	1.80706e-05	2.86021e-05	60.7329842931937|68.4898929845422|60.4109589041096	0|0|0	Chr2_17948919_17949021_R_Ex.AT2G43160.1_1
Chr2:13863727-13864597	AT2G32690	Chr2:13864011-13864271	IR	3	3	-	Ex.ONT.7457.25	-63.22	7.53535e-06	1.11168e-05	64.8648648648649|59.0163934426229|65.7894736842105	0|0|0	Chr2_13864011_13864271_R_Ex.ONT.7457.25_1
Chr2:13863720-13864595	AT2G32690	Chr2:13864110-13864253	IR	3	3	-	Ex.ONT.7457.1	-63.46	6.76977e-05	9.97658e-05	66.1764705882353|56.140350877193|68.0555555555556	0|0|0	Chr2_13864110_13864253_R_Ex.ONT.7457.1_1
Chr2:13863730-13864600	AT2G32690	Chr2:13864026-13864181	IR	3	3	-	Ex.ONT.7457.44	-63.51	5.55661e-05	8.18382e-05	66.2790697674419|56.5217391304348|67.741935483871	0|0|0	Chr2_13864026_13864181_R_Ex.ONT.7457.44_1
Chr2:13863724-13864600	AT2G32690	Chr2:13864011-13864253	IR	3	3	-	Ex.ONT.7457.20	-63.52	1.03896e-05	1.53271e-05	64.8648648648649|59.0163934426229|66.6666666666667	0|0|0	Chr2_13864011_13864253_R_Ex.ONT.7457.20_1
Chr2:13863722-13864585	AT2G32690	Chr2:13864137-13864361	IR	3	3	-	Ex.ONT.7457.3	-63.74	4.00697e-05	5.90647e-05	65.7142857142857|57.3770491803279|68.1159420289855	0|0|0	Chr2_13864137_13864361_R_Ex.ONT.7457.3_1
Chr2:13863730-13864593	AT2G32690	Chr2:13864035-13864361	IR	3	3	-	Ex.ONT.7457.33	-63.78	2.55856e-05	3.7725e-05	65.7142857142857|58.0645161290323|67.5675675675676	0|0|0	Chr2_13864035_13864361_R_Ex.ONT.7457.33_1
Chr1:29450750-29452476	ONT.2491	Chr1:29451644-29451706	IR (overlapping region)	3	3	-	ONT.2491.1	-63.88	6.73392e-05	8.21695e-05	57.2815533980583|64.2201834862385|70.1492537313433	0|0|0	Chr1_29451644_29451706_R_ONT.2491.1_1
Chr2:13863722-13864591	AT2G32690	Chr2:13864146-13864361	IR	3	3	-	Ex.ONT.7457.4	-63.96	2.97857e-05	4.39145e-05	65.7142857142857|58.0645161290323|68.1159420289855	0|0|0	Chr2_13864146_13864361_R_Ex.ONT.7457.4_1
Chr5:25383906-25387224	AT5G63370	Chr5:25385078-25385155	IR	3	3	-	AT5G63370.1	-64.07	0.000271755	0.00257338	74.3589743589744|61.25|56.6037735849057	0|0|0	Chr5_25385078_25385155_R_AT5G63370.1_1
Chr5:25383906-25387224	AT5G63370	Chr5:25385078-25385150	IR	3	3	-	AT5G63370.1	-64.07	0.000271755	0.00257338	74.3589743589744|61.25|56.6037735849057	0|0|0	Chr5_25385078_25385150_R_AT5G63370.1_1
Chr2:13863724-13864597	AT2G32690	Chr2:13863995-13864361	IR	3	3	-	Ex.ONT.7457.13	-64.18	5.61045e-05	8.26908e-05	65.7142857142857|57.3770491803279|69.4444444444444	0|0|0	Chr2_13863995_13864361_R_Ex.ONT.7457.13_1
Chr2:13863733-13864588	AT2G32690	Chr2:13864002-13864361	IR	3	3	-	Ex.ONT.7457.48	-64.41	4.31014e-05	6.34826e-05	65.7142857142857|58.0645161290323|69.4444444444444	0|0|0	Chr2_13864002_13864361_R_Ex.ONT.7457.48_1
Chr2:13863730-13864588	AT2G32690	Chr2:13864005-13864361	IR	3	3	-	Ex.ONT.7457.32	-64.41	4.31014e-05	6.3531e-05	65.7142857142857|58.0645161290323|69.4444444444444	0|0|0	Chr2_13864005_13864361_R_Ex.ONT.7457.32_1
Chr2:17948084-17948918	AT2G43160	Chr2:17948271-17948815	IR	3	3	-	Ex.AT2G43160.2	-64.43	1.35404e-05	2.14326e-05	61.7834394904459|69.4348327566321|62.0734908136483	0|0|0	Chr2_17948271_17948815_R_Ex.AT2G43160.2_1
Chr2:17948067-17948918	AT2G43160	Chr2:17948271-17948826	IR	3	3	-	Ex.AT2G43160.3	-64.43	1.35404e-05	2.14326e-05	61.7834394904459|69.4348327566321|62.0734908136483	0|0|0	Chr2_17948271_17948826_R_Ex.AT2G43160.3_1
Chr2:13863730-13864599	AT2G32690	Chr2:13864020-13864322	IR	3	3	-	Ex.ONT.7457.39	-64.46	4.48681e-06	6.62068e-06	64.7887323943662|61.0169491525424|67.5675675675676	0|0|0	Chr2_13864020_13864322_R_Ex.ONT.7457.39_1
Chr2:8969417-8970630	AT2G20830	Chr2:8969812-8970600	IR	3	3	-	AT2G20830.1	-64.5	1.93117e-05	3.36124e-05	59.2233009708738|68.4210526315789|65.8536585365854	0|0|0	Chr2_8969812_8970600_R_AT2G20830.1_1
Chr2:13863724-13864600	AT2G32690	Chr2:13863975-13864322	IR	3	3	-	Ex.ONT.7457.19	-64.6	5.67587e-06	8.37423e-06	64.7887323943662|61.0169491525424|68	0|0|0	Chr2_13863975_13864322_R_Ex.ONT.7457.19_1
Chr5:25383906-25387224	AT5G63370	Chr5:25385078-25387099	IR	3	3	-	AT5G63370.1	-64.85	6.26408e-06	5.93481e-05	68.9320388349515|62.1359223300971|63.4920634920635	0|0|0	Chr5_25385078_25387099_R_AT5G63370.1_1
Chr2:13863733-13864588	AT2G32690	Chr2:13864005-13864250	IR	3	3	-	Ex.ONT.7457.49	-65.32	3.36074e-05	4.95429e-05	67.6056338028169|59.0163934426229|69.3333333333333	0|0|0	Chr2_13864005_13864250_R_Ex.ONT.7457.49_1
Chr2:13863729-13864597	AT2G32690	Chr2:13864003-13864250	IR	3	3	-	Ex.ONT.7457.28	-65.32	3.36074e-05	4.95429e-05	67.6056338028169|59.0163934426229|69.3333333333333	0|0|0	Chr2_13864003_13864250_R_Ex.ONT.7457.28_1
Chr1:28896371-28896883	AT1G76930	Chr1:28896389-28896605	IR	3	3	-	AT1G76930.1	-65.78	3.35741e-06	4.06751e-06	69.3693693693694|64.2424242424242|63.7254901960784	0|0|0	Chr1_28896389_28896605_R_AT1G76930.1_1
Chr2:15165437-15166465	AT2G36120	Chr2:15165604-15166086	IR	3	3	-	AT2G36120.1	-65.79	6.75071e-06	1.01591e-05	62.2222222222222|69.6428571428571|65.5172413793103	0|0|0	Chr2_15165604_15166086_R_AT2G36120.1_1
Chr1:28896371-28896883	AT1G76930	Chr1:28896437-28896605	IR	3	3	-	AT1G76930.1	-65.84	3.10778e-06	3.76522e-06	69.3693693693694|64.2424242424242|63.9024390243902	0|0|0	Chr1_28896437_28896605_R_AT1G76930.1_1
Chr3:7916489-7919484	AT3G22380	Chr3:7918872-7918944	IR	3	3	-	AT3G22380.1	-66.15	0.000412494	0.00106048	58.0645161290323|62.2641509433962|78.125	0|0|0	Chr3_7918872_7918944_R_AT3G22380.1_1
Chr2:8969417-8970630	AT2G20830	Chr2:8970431-8970600	IR	3	3	-	AT2G20830.1	-66.35	5.57024e-05	9.69417e-05	60.3960396039604|73.0769230769231|65.5737704918033	0|0|0	Chr2_8970431_8970600_R_AT2G20830.1_1
Chr1:5295773-5296824	AT1G15400	Chr1:5296047-5296405	IR	3	3	-	Ex.AT1G15400.3	-66.44	7.10665e-08	9.17858e-08	66.2576687116564|65.3409090909091|67.7215189873418	0|0|0	Chr1_5296047_5296405_R_Ex.AT1G15400.3_1
Chr2:15165437-15166465	AT2G36120	Chr2:15165601-15166083	IR	3	3	-	AT2G36120.1	-67.05	1.36534e-05	2.05427e-05	62.2222222222222|71.1864406779661|67.741935483871	0|0|0	Chr2_15165601_15166083_R_AT2G36120.1_1
Chr2:13863729-13864600	AT2G32690	Chr2:13864035-13864346	IR	3	3	-	Ex.ONT.7457.30	-67.32	5.25371e-06	7.75169e-06	70.7692307692308|63.6363636363636|67.5675675675676	0|0|0	Chr2_13864035_13864346_R_Ex.ONT.7457.30_1
Chr3:5816092-5816579	ONT.8771	Chr3:5816236-5816271	IR	3	3	-	ONT.8771.10	-67.48	0.000318352	0.000775382	56|75|71.4285714285714	0|0|0	Chr3_5816236_5816271_R_ONT.8771.10_1
Chr3:680944-681974	AT3G03020	Chr3:681292-681648	IR	3	3	-	Ex.AT3G03020.2	-67.56	4.80934e-05	0.000119992	60.6060606060606|72.7272727272727|69.3548387096774	0|0|0	Chr3_681292_681648_R_Ex.AT3G03020.2_1
Chr3:680944-681999	AT3G03020	Chr3:681292-681568	IR	3	3	-	Ex.AT3G03020.1	-67.76	3.84507e-05	9.59402e-05	61.1940298507463|72.7272727272727|69.3548387096774	0|0|0	Chr3_681292_681568_R_Ex.AT3G03020.1_1
Chr5:2330399-2332281	AT5G07370	Chr5:2330845-2330956	IR	3	3	-	AT5G07370.4	-67.82	1.74534e-05	0.000136678	71.0526315789474|62.2222222222222|70.1754385964912	0|0|0	Chr5_2330845_2330956_R_AT5G07370.4_1
Chr2:13863724-13864600	AT2G32690	Chr2:13864035-13864274	IR	3	3	-	Ex.ONT.7457.18	-68.12	5.68871e-06	8.39284e-06	71.6417910447761|64.2857142857143|68.4210526315789	0|0|0	Chr2_13864035_13864274_R_Ex.ONT.7457.18_1
Chr2:15165437-15166465	AT2G36120	Chr2:15165682-15166181	IR	3	3	-	AT2G36120.1	-68.25	4.63797e-05	6.97422e-05	61.0169491525424|71.7948717948718|71.9298245614035	0|0|0	Chr2_15165682_15166181_R_AT2G36120.1_1
Chr3:5816092-5816579	ONT.8771	Chr3:5816234-5816269	IR	3	3	-	ONT.8771.10	-68.44	0.000247723	0.000603439	57.6923076923077|76.1904761904762|71.4285714285714	0|0|0	Chr3_5816234_5816269_R_ONT.8771.10_1
Chr2:15165437-15166465	AT2G36120	Chr2:15165671-15166181	IR	3	3	-	AT2G36120.1	-68.46	3.58509e-05	5.3912e-05	61.6666666666667|71.7948717948718|71.9298245614035	0|0|0	Chr2_15165671_15166181_R_AT2G36120.1_1
Chr2:15165437-15166465	AT2G36120	Chr2:15165667-15166182	IR	3	3	-	AT2G36120.1	-68.46	3.58509e-05	5.3912e-05	61.6666666666667|71.7948717948718|71.9298245614035	0|0|0	Chr2_15165667_15166182_R_AT2G36120.1_1
Chr2:15165437-15166465	AT2G36120	Chr2:15165666-15166181	IR	3	3	-	AT2G36120.1	-68.46	3.58509e-05	5.3912e-05	61.6666666666667|71.7948717948718|71.9298245614035	0|0|0	Chr2_15165666_15166181_R_AT2G36120.1_1
Chr2:15165437-15166465	AT2G36120	Chr2:15165646-15166181	IR	3	3	-	AT2G36120.1	-68.46	3.58509e-05	5.3912e-05	61.6666666666667|71.7948717948718|71.9298245614035	0|0|0	Chr2_15165646_15166181_R_AT2G36120.1_1
Chr2:15165437-15166465	AT2G36120	Chr2:15165604-15166176	IR	3	3	-	AT2G36120.1	-68.62	5.97505e-07	8.99845e-07	67.6056338028169|71.0526315789474|67.2131147540984	0|0|0	Chr2_15165604_15166176_R_AT2G36120.1_1
Chr2:15165437-15166465	AT2G36120	Chr2:15165601-15166176	IR	3	3	-	AT2G36120.1	-68.62	5.97505e-07	8.99845e-07	67.6056338028169|71.0526315789474|67.2131147540984	0|0|0	Chr2_15165601_15166176_R_AT2G36120.1_1
Chr2:15165437-15166465	AT2G36120	Chr2:15165604-15166181	IR	3	3	-	AT2G36120.1	-68.87	1.2288e-06	1.85051e-06	67.6056338028169|71.7948717948718|67.2131147540984	0|0|0	Chr2_15165604_15166181_R_AT2G36120.1_1
Chr2:13863730-13864600	AT2G32690	Chr2:13863975-13864250	IR	3	3	-	Ex.ONT.7457.41	-68.92	9.15293e-05	0.000134881	72.289156626506|60.3174603174603|74.1573033707865	0|0|0	Chr2_13863975_13864250_R_Ex.ONT.7457.41_1
Chr1:5295827-5296882	AT1G15400	Chr1:5296052-5296405	IR	3	3	-	Ex.AT1G15400.1	-69.59	1.66082e-07	2.14496e-07	68.3908045977011|69.0355329949239|71.3483146067416	0|0|0	Chr1_5296052_5296405_R_Ex.AT1G15400.1_1
Chr2:15165437-15166465	AT2G36120	Chr2:15165658-15166173	IR	3	3	-	AT2G36120.1	-70.58	2.35725e-05	3.5461e-05	76|70.6666666666667|65.0793650793651	0|0|0	Chr2_15165658_15166173_R_AT2G36120.1_1
Chr5:25383906-25387224	AT5G63370	Chr5:25386786-25387099	IR	3	3	-	AT5G63370.1	-70.98	5.21859e-06	4.94555e-05	73.5537190082645|66.6666666666667|72.7272727272727	0|0|0	Chr5_25386786_25387099_R_AT5G63370.1_1
Chr5:25383906-25387224	AT5G63370	Chr5:25386783-25387099	IR	3	3	-	AT5G63370.1	-70.98	5.21859e-06	4.94555e-05	73.5537190082645|66.6666666666667|72.7272727272727	0|0|0	Chr5_25386783_25387099_R_AT5G63370.1_1
Chr4:12332641-12333711	AT4G23670	Chr4:12333126-12333480	IR	3	3	-	ONT.14246.2	-70.99	1.50265e-06	4.30798e-06	73.5849056603774|68.1034482758621|71.2962962962963	0|0|0	Chr4_12333126_12333480_R_ONT.14246.2_1
Chr2:15165437-15166465	AT2G36120	Chr2:15165646-15166173	IR	3	3	-	AT2G36120.1	-72.67	1.3589e-06	2.04626e-06	70.3703703703704|75.7142857142857|71.9298245614035	0|0|0	Chr2_15165646_15166173_R_AT2G36120.1_1
Chr2:15165437-15166465	AT2G36120	Chr2:15165646-15166172	IR	3	3	-	AT2G36120.1	-72.67	1.3589e-06	2.04626e-06	70.3703703703704|75.7142857142857|71.9298245614035	0|0|0	Chr2_15165646_15166172_R_AT2G36120.1_1
Chr5:16665330-16667171	AT5G41670	Chr5:16665544-16665619	IR	3	3	-	AT5G41670.2	-72.94	1.17762e-05	6.1085e-05	78.3783783783784|70.7692307692308|69.6774193548387	0|0|0	Chr5_16665544_16665619_R_AT5G41670.2_1
Chr2:15165437-15166465	AT2G36120	Chr2:15165658-15166209	IR	3	3	-	AT2G36120.1	-73.16	1.73674e-06	2.61479e-06	75.5102040816327|74.1176470588235|69.8630136986301	0|0|0	Chr2_15165658_15166209_R_AT2G36120.1_1
Chr5:19240576-19241223	AT5G47430	Chr5:19240610-19240801	IR	3	3	-	ONT.18675.5	-74.32	5.31958e-10	3.1235e-09	74.2857142857143|74.7368421052632|73.9495798319328	0|0|0	Chr5_19240610_19240801_R_ONT.18675.5_1
Chr2:17194751-17195098	AT2G41230	Chr2:17194897-17194987	IR	3	3	-	Ex.ONT.7823.3	-74.78	1.06746e-08	1.66795e-08	75.6521739130435|74.7252747252747|73.972602739726	0|0|0	Chr2_17194897_17194987_R_Ex.ONT.7823.3_1
Chr2:15165437-15166465	AT2G36120	Chr2:15165676-15166146	IR	3	3	-	AT2G36120.1	-75.01	5.09923e-07	7.68008e-07	74|77.5510204081633|73.469387755102	0|0|0	Chr2_15165676_15166146_R_AT2G36120.1_1
Chr2:13863730-13864599	AT2G32690	Chr2:13864001-13864367	IR	3	3	-	Ex.ONT.7457.38	-76.18	1.4805e-06	2.18496e-06	79.3103448275862|73.469387755102|75.7575757575758	0|0|0	Chr2_13864001_13864367_R_Ex.ONT.7457.38_1
Chr2:13863727-13864600	AT2G32690	Chr2:13864001-13864355	IR	3	3	-	Ex.ONT.7457.26	-76.18	1.4805e-06	2.18496e-06	79.3103448275862|73.469387755102|75.7575757575758	0|0|0	Chr2_13864001_13864355_R_Ex.ONT.7457.26_1
Chr2:13863724-13864599	AT2G32690	Chr2:13864005-13864335	IR	3	3	-	Ex.ONT.7457.15	-76.18	1.4805e-06	2.18496e-06	79.3103448275862|73.469387755102|75.7575757575758	0|0|0	Chr2_13864005_13864335_R_Ex.ONT.7457.15_1
Chr2:13863724-13864599	AT2G32690	Chr2:13864002-13864367	IR	3	3	-	Ex.ONT.7457.14	-76.18	1.4805e-06	2.18496e-06	79.3103448275862|73.469387755102|75.7575757575758	0|0|0	Chr2_13864002_13864367_R_Ex.ONT.7457.14_1
ChrC:81189-82652	ATCG00790	ChrC:81588-82643	IR	3	3	-	Ex.ATCG00790.1	-76.28	7.11674e-10	2.61547e-05	76.4275256222547|76.625386996904|75.7909215955983	0|0|0	ChrC_81588_82643_R_Ex.ATCG00790.1_1
Chr4:9715774-9716525	AT4G17410	Chr4:9716190-9716349	IR	3	3	-	AT4G17410.1	-76.53	6.03853e-05	0.000267473	73.3333333333333|71.1538461538462|85.1063829787234	0|0|0	Chr4_9716190_9716349_R_AT4G17410.1_1
Chr2:13863727-13864588	AT2G32690	Chr2:13864002-13864271	IR	3	3	-	Ex.ONT.7457.24	-76.65	2.1967e-06	3.24155e-06	80|73.469387755102|76.4705882352941	0|0|0	Chr2_13864002_13864271_R_Ex.ONT.7457.24_1
Chr2:13863726-13864600	AT2G32690	Chr2:13864005-13864271	IR	3	3	-	Ex.ONT.7457.23	-76.65	2.1967e-06	3.24155e-06	80|73.469387755102|76.4705882352941	0|0|0	Chr2_13864005_13864271_R_Ex.ONT.7457.23_1
Chr1:5602873-5604663	AT1G16390	Chr1:5603930-5604062	IR	3	3	-	AT1G16390.1	-76.9	4.95073e-05	6.4221e-05	82.258064516129|79.6875|68.75	0|0|0	Chr1_5603930_5604062_R_AT1G16390.1_1
Chr2:15165437-15166465	AT2G36120	Chr2:15165685-15166146	IR	3	3	-	AT2G36120.1	-77.01	4.16219e-07	6.26904e-07	78.2608695652174|74.5098039215686|78.2608695652174	0|0|0	Chr2_15165685_15166146_R_AT2G36120.1_1
Chr2:15165437-15166465	AT2G36120	Chr2:15165694-15166146	IR	3	3	-	AT2G36120.1	-77.33	2.28284e-08	3.43852e-08	76.1904761904762|77.5510204081633|78.2608695652174	0|0|0	Chr2_15165694_15166146_R_AT2G36120.1_1
Chr2:13863724-13864595	AT2G32690	Chr2:13864119-13864271	IR	3	3	-	Ex.ONT.7457.9	-78.03	1.80928e-06	2.67007e-06	80.3571428571429|74.4186046511628|79.3103448275862	0|0|0	Chr2_13864119_13864271_R_Ex.ONT.7457.9_1
Chr2:15165437-15166465	AT2G36120	Chr2:15165667-15166146	IR	3	3	-	AT2G36120.1	-78.33	7.61537e-09	1.14711e-08	79.1666666666667|77.5510204081633|78.2608695652174	0|0|0	Chr2_15165667_15166146_R_AT2G36120.1_1
Chr2:11070639-11071287	AT2G25964	Chr2:11071052-11071134	IR	3	3	-	AT2G25964.1	-78.69	9.16999e-07	1.29057e-06	78.2608695652174|81.5789473684211|76.2376237623762	0|0|0	Chr2_11071052_11071134_R_AT2G25964.1_1
Chr3:7140440-7141228	AT3G20470	Chr3:7140738-7140869	IR	3	3	-	AT3G20470.1	-80.41	4.51669e-06	1.1432e-05	83.0508474576271|75.6756756756757|82.5	0|0|0	Chr3_7140738_7140869_R_AT3G20470.1_1
Chr3:7140440-7141228	AT3G20470	Chr3:7140708-7140869	IR	3	3	-	AT3G20470.1	-80.55	5.00427e-06	1.26635e-05	83.0508474576271|75.6756756756757|82.9268292682927	0|0|0	Chr3_7140708_7140869_R_AT3G20470.1_1
Chr3:7140440-7141228	AT3G20470	Chr3:7140692-7140869	IR	3	3	-	AT3G20470.1	-80.82	4.72862e-06	1.19668e-05	83.3333333333333|76|83.1325301204819	0|0|0	Chr3_7140692_7140869_R_AT3G20470.1_1
Chr2:13863724-13864591	AT2G32690	Chr2:13863972-13864211	IR	3	3	-	Ex.ONT.7457.8	-81.23	4.76436e-06	7.02995e-06	80|77.7777777777778|85.9154929577465	0|0|0	Chr2_13863972_13864211_R_Ex.ONT.7457.8_1
Chr1:20803704-20804573	AT1G55675	Chr1:20804463-20804551	IR	3	3	-	AT1G55675.1	-81.36	4.31139e-09	4.75648e-09	82.051282051282|81.4285714285714|80.5970149253731	0|0|0	Chr1_20804463_20804551_R_AT1G55675.1_1
Chr2:9079008-9079622	ONT.7018	Chr2:9079226-9079352	IR	3	3	-	ONT.7018.2	-82.69	2.96819e-08	5.18091e-08	83.1858407079646|81.3186813186813|83.5616438356164	0|0|0	Chr2_9079226_9079352_R_ONT.7018.2_1
Chr1:20803704-20804573	AT1G55675	Chr1:20804411-20804551	IR	3	3	-	AT1G55675.1	-83.17	4.64353e-09	5.12276e-09	83.1325301204819|83.9506172839506|82.4324324324324	0|0|0	Chr1_20804411_20804551_R_AT1G55675.1_1
Chr5:13414945-13417265	AT5G35160	Chr5:13415074-13415157	IR	3	3	-	AT5G35160.2	-83.69	4.1912e-06	1.95993e-05	79.1044776119403|84.6153846153846|87.3417721518987	0|0|0	Chr5_13415074_13415157_R_AT5G35160.2_1
Chr2:17194758-17195680	AT2G41230	Chr2:17194897-17195230	IR	3	3	-	Ex.ONT.7823.4	-83.74	8.74027e-08	1.36553e-07	85.4166666666667|83.5714285714286|82.2429906542056	0|0|0	Chr2_17194897_17195230_R_Ex.ONT.7823.4_1
Chr3:2889489-2890228	AT3G09390	Chr3:2889761-2890144	IR	3	3	-	ONT.10378.2	-83.89	7.81186e-09	1.7299e-08	84.6938775510204|82.962962962963|84.0255591054313	0|0|0	Chr3_2889761_2890144_R_ONT.10378.2_1
Chr5:3377678-3378407	AT5G10700	Chr5:3378102-3378228	IR (overlapping region)	3	3	-	ONT.17597.1	-84.22	6.98234e-07	9.3312e-06	83.289817232376|82.1086261980831|87.2549019607843	0|0|0	Chr5_3378102_3378228_R_ONT.17597.1_1
Chr3:7140440-7141228	AT3G20470	Chr3:7140671-7140868	IR	3	3	-	AT3G20470.1	-86.57	6.29222e-07	1.59282e-06	88.5057471264368|83.4862385321101|87.719298245614	0|0|0	Chr3_7140671_7140868_R_AT3G20470.1_1
Chr3:7140440-7141228	AT3G20470	Chr3:7140673-7140869	IR	3	3	-	AT3G20470.1	-86.58	5.3425e-07	1.35259e-06	88.5057471264368|83.6363636363636|87.6106194690265	0|0|0	Chr3_7140673_7140869_R_AT3G20470.1_1
Chr3:7140440-7141228	AT3G20470	Chr3:7140672-7140869	IR	3	3	-	AT3G20470.1	-86.62	5.51834e-07	1.39701e-06	88.5057471264368|83.6363636363636|87.719298245614	0|0|0	Chr3_7140672_7140869_R_AT3G20470.1_1
Chr4:7004335-7006081	AT4G11570	Chr4:7004413-7004685	IR	3	3	-	AT4G11570.2	-86.68	9.08161e-06	3.6365e-05	90.2255639097744|89.1891891891892|80.6122448979592	0|0|0	Chr4_7004413_7004685_R_AT4G11570.2_1
Chr4:7004335-7006081	AT4G11570	Chr4:7004413-7004656	IR	3	3	-	AT4G11570.2	-86.68	9.08161e-06	3.6365e-05	90.2255639097744|89.1891891891892|80.6122448979592	0|0|0	Chr4_7004413_7004656_R_AT4G11570.2_1
Chr3:1848880-1849336	ONT.8320	Chr3:1849037-1849140	IR	3	3	-	Ex.ONT.8320.2	-86.88	1.40969e-06	2.68822e-06	90|87.2340425531915|83.3976833976834	0|0|0	Chr3_1849037_1849140_R_Ex.ONT.8320.2_1
Chr2:17194761-17195683	AT2G41230	Chr2:17194897-17195334	IR	3	3	-	Ex.ONT.7823.5	-86.91	2.16803e-08	3.3875e-08	88.2352941176471|86.4705882352941|86.0294117647059	0|0|0	Chr2_17194897_17195334_R_Ex.ONT.7823.5_1
Chr5:9206422-9207532	AT5G26270	Chr5:9206962-9207095	IR	3	3	-	ONT.15906.2	-87.69	1.03997e-05	0.00141033	86.9565217391304|82.5757575757576|93.5483870967742	0|0|0	Chr5_9206962_9207095_R_ONT.15906.2_1
Chr5:9206422-9207532	AT5G26270	Chr5:9207009-9207095	IR	3	3	-	ONT.15906.2	-87.71	1.05981e-05	0.00142671	86.9565217391304|82.5757575757576|93.6	0|0|0	Chr5_9207009_9207095_R_ONT.15906.2_1
Chr4:2375511-2376360	ONT.13610	Chr4:2375979-2376114	IR	3	3	-	ONT.13610.2	-88.04	1.60852e-06	6.0272e-06	90.2684563758389|84.0361445783133|89.8071625344353	0|0|0	Chr4_2375979_2376114_R_ONT.13610.2_1
Chr4:2375511-2376360	ONT.13610	Chr4:2376019-2376114	IR	3	3	-	ONT.13610.2	-88.24	2.00955e-06	7.5291e-06	90.8783783783784|84.0361445783133|89.8071625344353	0|0|0	Chr4_2376019_2376114_R_ONT.13610.2_1
Chr3:9665565-9666348	ONT.9151	Chr3:9665720-9665951	IR	3	3	-	ONT.9151.2	-88.46	2.88058e-09	7.64472e-09	88.0434782608696|88.0434782608696|89.2857142857143	0|0|0	Chr3_9665720_9665951_R_ONT.9151.2_1
Chr5:771752-773165	AT5G03240	Chr5:772120-772803	IR	3	3	-	AT5G03240.2	-88.68	3.27155e-06	0.000142964	90.7407407407407|83.8709677419355|91.4285714285714	0|0|0	Chr5_772120_772803_R_AT5G03240.2_1
Chr3:2889489-2890228	AT3G09390	Chr3:2889767-2890150	IR	3	3	-	ONT.10378.2	-88.86	8.31346e-08	1.84064e-07	88.6792452830189|87.2881355932203|90.6137184115523	0|0|0	Chr3_2889767_2890150_R_ONT.10378.2_1
Chr3:7140440-7141228	AT3G20470	Chr3:7140700-7140860	IR	3	3	-	AT3G20470.1	-89.19	5.90736e-08	1.49581e-07	87.719298245614|89.0625|90.7894736842105	0|0|0	Chr3_7140700_7140860_R_AT3G20470.1_1
Chr3:7140440-7141228	AT3G20470	Chr3:7140699-7140860	IR	3	3	-	AT3G20470.1	-89.19	5.90736e-08	1.49581e-07	87.719298245614|89.0625|90.7894736842105	0|0|0	Chr3_7140699_7140860_R_AT3G20470.1_1
Chr3:7140440-7141228	AT3G20470	Chr3:7140698-7140860	IR	3	3	-	AT3G20470.1	-89.19	5.90736e-08	1.49581e-07	87.719298245614|89.0625|90.7894736842105	0|0|0	Chr3_7140698_7140860_R_AT3G20470.1_1
Chr3:17157944-17158381	AT3G46600	Chr3:17158210-17158301	IR	3	3	-	AT3G46600.2	-91.08	5.60993e-08	1.04613e-07	92.6027397260274|91.1392405063291|89.501312335958	0|0|0	Chr3_17158210_17158301_R_AT3G46600.2_1
Chr3:17157944-17158381	AT3G46600	Chr3:17158210-17158297	IR	3	3	-	AT3G46600.2	-91.08	5.60993e-08	1.04613e-07	92.6027397260274|91.1392405063291|89.501312335958	0|0|0	Chr3_17158210_17158297_R_AT3G46600.2_1
Chr2:9265280-9266371	AT2G21660	Chr2:9265485-9265721	IR	3	3	-	ONT.7034.8	-92.14	2.79723e-08	4.91378e-08	92.6773455377574|93.0966469428008|90.6318082788671	0|0|0	Chr2_9265485_9265721_R_ONT.7034.8_1
Chr2:9265280-9266371	AT2G21660	Chr2:9265485-9265664	IR	3	3	-	ONT.7034.8	-92.21	2.25606e-08	3.96331e-08	92.6940639269406|93.1506849315068|90.7922912205567	0|0|0	Chr2_9265485_9265664_R_ONT.7034.8_1
Chr2:9265280-9266371	AT2G21660	Chr2:9265486-9265680	IR	3	3	-	ONT.7034.8	-92.25	2.23325e-08	3.92343e-08	92.7437641723356|93.17738791423|90.8315565031983	0|0|0	Chr2_9265486_9265680_R_ONT.7034.8_1
Chr2:9265280-9266371	AT2G21660	Chr2:9265485-9265679	IR	3	3	-	ONT.7034.8	-92.29	2.00483e-08	3.5223e-08	92.7765237020316|93.1906614785992|90.9090909090909	0|0|0	Chr2_9265485_9265679_R_ONT.7034.8_1
Chr1:26036665-26037648	ONT.2108	Chr1:26037277-26037405	IR	3	3	-	ONT.2108.2	-92.42	1.43138e-08	1.66983e-08	93.4306569343066|92.6174496644295|91.2186379928315	0|0|0	Chr1_26037277_26037405_R_ONT.2108.2_1
Chr1:26036665-26037648	ONT.2108	Chr1:26037277-26037399	IR	3	3	-	ONT.2108.2	-92.42	1.43138e-08	1.66983e-08	93.4306569343066|92.6174496644295|91.2186379928315	0|0|0	Chr1_26037277_26037399_R_ONT.2108.2_1
Chr3:2889489-2890228	AT3G09390	Chr3:2889905-2890117	IR	3	3	-	ONT.10378.2	-92.5	3.26294e-08	7.22518e-08	93.2960893854749|93.2885906040269|90.9090909090909	0|0|0	Chr3_2889905_2890117_R_ONT.10378.2_1
Chr5:894708-895381	AT5G03545	Chr5:894994-895057	IR	3	3	-	Ex.ONT.15058.3	-94.6	2.6605e-09	2.7936e-07	93.8053097345133|95.3007518796992|94.6902654867257	0|0|0	Chr5_894994_895057_R_Ex.ONT.15058.3_1
Chr5:894707-895388	AT5G03545	Chr5:894994-895049	IR	3	3	-	Ex.ONT.15058.1	-94.6	2.6605e-09	2.7936e-07	93.8053097345133|95.3007518796992|94.6902654867257	0|0|0	Chr5_894994_895049_R_Ex.ONT.15058.1_1
Chr3:2889489-2890228	AT3G09390	Chr3:2889779-2890160	IR	3	3	-	ONT.10378.2	-94.79	4.61176e-08	1.02113e-07	95.631067961165|93.010752688172|95.7142857142857	0|0|0	Chr3_2889779_2890160_R_ONT.10378.2_1
Chr3:17158302-17159965	AT3G46600	Chr3:17158382-17158440	IR	3	3	-	AT3G46600.3	-94.86	2.30895e-08	4.30612e-08	96.045197740113|95.049504950495|93.4782608695652	0|0|0	Chr3_17158382_17158440_R_AT3G46600.3_1
Chr2:9265280-9266371	AT2G21660	Chr2:9265491-9265682	IR	3	3	-	ONT.7034.8	-96.33	2.24162e-09	3.9387e-09	96.9194312796209|96.551724137931|95.5056179775281	0|0|0	Chr2_9265491_9265682_R_ONT.7034.8_1
Chr5:23400715-23401267	AT5G57760	Chr5:23400920-23401109	IR (overlapping region)	3	3	-	AT5G57760.1	-96.34	2.09985e-07	1.65179e-06	97.6190476190476|97.6958525345622|93.7037037037037	0|0|0	Chr5_23400920_23401109_R_AT5G57760.1_1
Chr2:9265280-9266371	AT2G21660	Chr2:9265503-9265697	IR	3	3	-	ONT.7034.8	-96.76	1.6835e-09	2.95818e-09	95.9715639810426|97.119341563786|97.196261682243	0|0|0	Chr2_9265503_9265697_R_ONT.7034.8_1
Chr2:9265280-9266371	AT2G21660	Chr2:9265499-9265583	IR	3	3	-	ONT.7034.8	-96.98	1.18069e-09	2.07476e-09	96.2555066079295|97.2602739726027|97.4137931034483	0|0|0	Chr2_9265499_9265583_R_ONT.7034.8_1
Chr5:19623481-19624199	ONT.18721	Chr5:19623990-19624089	IR	3	3	-	Ex.ONT.18721.2	-97.13	1.14869e-09	6.97314e-09	96.4183381088825|97.6054732041049|97.3551637279597	0|0|0	Chr5_19623990_19624089_R_Ex.ONT.18721.2_1
Chr5:19623481-19624199	ONT.18721	Chr5:19623976-19624089	IR	3	3	-	Ex.ONT.18721.3	-97.13	1.14869e-09	6.97314e-09	96.4183381088825|97.6054732041049|97.3551637279597	0|0|0	Chr5_19623976_19624089_R_Ex.ONT.18721.3_1

## Sheet: C v.s D
Event_Region	GeneID	Target_Exon	Event_Type	N	T	Exon_Type	Reference_Transcript	?捻SI(%)	T-test_p-value	FDR(BH)	N_Values	T_Values	DatabaseID
Chr3:16945493-16945620	AT3G46130	Chr3:16945493-16945550	TSS|A5SS	3	3	-	TSS.AT3G46130.1	44.91	0.00818	0.015	0|20|0	45.4545454545455|64.2857142857143|45	Chr3_16945493_16945620_S_TSS.AT3G46130.1_1
Chr1:13078916-13079304	AT1G35516	Chr1:13078916-13078929	A5SS	3	3	-	AT1G35516.1	32.75	0.000925	0.000959	7.84313725490196|15.1260504201681|12	41.6666666666667|41.0071942446043|50.5376344086022	Chr1_13078916_13079304_S_AT1G35516.1_1
Chr2:11696800-11697448	AT2G27340	Chr2:11696937-11697448	TSS|A3SS	3	3	-	TSS.AT2G27340.1	30.96	0.000969	0.00136	66.6666666666667|61.5384615384615|63.6363636363636	88.8888888888889|100|95.8333333333333	Chr2_11696800_11697448_S_TSS.AT2G27340.1_1
Chr2:18132789-18133188	AT2G43760	Chr2:18132789-18133081	A5SS	3	3	-	AT2G43760.1	26.96	0.000146	0.000229	7.34463276836158|13.3689839572193|8.04020100502512	36.5|36.8181818181818|36.3095238095238	Chr2_18132789_18133188_S_AT2G43760.1_1
Chr2:16027311-16028260	ONT.7691	Chr2:16027448-16028260	TSS|A5SS	3	3	-	TSS.ONT.7691.2	26.15	0.00541	0.00819	18.1818181818182|26.530612244898|16.2790697674419	42.5531914893617|53.6585365853659|43.2432432432432	Chr2_16027311_16028260_S_TSS.ONT.7691.2_1
Chr4:5378203-5380530	AT4G08460	Chr4:5378698-5378821	SES	3	3	-	AT4G08460.1	25.63	0.00195	0.00743	26.056338028169|17.6190476190476|21.9858156028369	44.3708609271523|52.6315789473684|45.5357142857143	Chr4_5378203_5380530_W_AT4G08460.1_1
Chr1:4695639-4695978	AT1G13700	Chr1:4695954-4695978	TSS|A5SS	3	3	-	TSS.AT1G13700.1	25.3	0.00165	0.00209	25.4237288135593|21.4285714285714|15.6862745098039	46.9135802469136|48.8095238095238|42.7083333333333	Chr1_4695639_4695978_S_TSS.AT1G13700.1_1
Chr2:18701144-18701536	AT2G45380	Chr2:18701144-18701145	A3SS	3	3	-	Ex.AT2G45380.1	24.15	0.000618	0.000985	40.8866995073892|42.9245283018868|36.2790697674419	66.2447257383966|61.2546125461255|65.0557620817844	Chr2_18701144_18701536_S_Ex.AT2G45380.1_1
Chr3:462787-463031	AT3G02300	Chr3:462787-462954	A5SS	3	3	-	ONT.8160.3	21.17	0.0014	0.00325	18.0722891566265|12.037037037037|18.8888888888889	40.5405405405405|35.1351351351351|36.8421052631579	Chr3_462787_463031_S_ONT.8160.3_1
Chr1:24244537-24244800	AT1G65270	Chr1:24244795-24244800	TSS|A3SS	3	3	-	TSS.AT1G65270.1	21.11	0.00358	0.00406	60.7142857142857|53.6036036036036|50.4761904761905	73.4782608695652|79.0794979079498|75.5656108597285	Chr1_24244537_24244800_S_TSS.AT1G65270.1_1
Chr1:27576480-27576900	AT1G73350	Chr1:27576480-27576519	A3SS	3	3	-	AT1G73350.3	20.76	0.00344	0.00407	35.6164383561644|35.0649350649351|35.8208955223881	50|57.3770491803279|61.4035087719298	Chr1_27576480_27576900_S_AT1G73350.3_1
Chr2:1646032-1646154	AT2G04690	Chr2:1646032-1646066	TSS|A5SS	3	3	-	TSS.AT2G04690.2	20.34	0.000453	0.000689	32.312925170068|33.1288343558282|35.9154929577465	57.2192513368984|53.1881804043546|51.9762845849802	Chr2_1646032_1646154_S_TSS.AT2G04690.2_1
Chr2:16476556-16476643	AT2G39470	Chr2:16476556-16476558	A5SS	3	3	-	Ex.AT2G39470.1	18.68	0.00946	0.0144	64.1025641025641|59.4594594594595|53.125	73.7623762376238|76.9230769230769|82.0408163265306	Chr2_16476556_16476643_S_Ex.AT2G39470.1_1
Chr2:16476535-16476643	AT2G39470	Chr2:16476535-16476558	A5SS	3	3	-	AT2G39470.1	18.68	0.00946	0.0144	64.1025641025641|59.4594594594595|53.125	73.7623762376238|76.9230769230769|82.0408163265306	Chr2_16476535_16476643_S_AT2G39470.1_1
Chr2:11696800-11697647	AT2G27340	Chr2:11696937-11697558	SES	3	3	-	ONT.5789.2	17.92	0.003	0.00422	81.5789473684211|75|82.2222222222222	94.6428571428571|100|97.9166666666667	Chr2_11696800_11697647_W_ONT.5789.2_1
Chr3:9910793-9911367	AT3G26890	Chr3:9910873-9910944	SES	3	3	-	AT3G26890.6	17.09	0.00902	0.024	4.76190476190476|13.7931034482759|13.0434782608696	23.4042553191489|29.0322580645161|30.4347826086957	Chr3_9910793_9911367_W_AT3G26890.6_1
Chr2:17916037-17916307	AT2G43080	Chr2:17916112-17916307	A3SS	3	3	-	ONT.6388.2	16.89	0.00134	0.00209	25.4385964912281|19.1176470588235|20	36.8932038834951|39.1304347826087|39.2156862745098	Chr2_17916037_17916307_S_ONT.6388.2_1
Chr2:9223762-9224336	AT2G21540	Chr2:9224154-9224336	TSS|A5SS	3	3	-	TSS.AT2G21540.3	16.29	0.000813	0.00141	75.3623188405797|73.9130434782609|69.4444444444444	89.344262295082|88.8|89.4308943089431	Chr2_9223762_9224336_S_TSS.AT2G21540.3_1
Chr3:6035541-6035687	AT3G17650	Chr3:6035620-6035687	A3SS	3	3	-	ONT.8792.2	16.05	0.000466	0.00114	8.60215053763441|12.8712871287129|10.2564102564103	24.8730964467005|27.2222222222222|27.7777777777778	Chr3_6035541_6035687_S_ONT.8792.2_1
Chr3:6035541-6035667	AT3G17650	Chr3:6035620-6035667	A3SS	3	3	-	ONT.8792.2	16.05	0.000466	0.00114	8.60215053763441|12.8712871287129|10.2564102564103	24.8730964467005|27.2222222222222|27.7777777777778	Chr3_6035541_6035667_S_ONT.8792.2_1
Chr3:11745323-11745994	AT3G29970	Chr3:11745323-11745389	A5SS	3	3	-	Ex.TSS.AT3G29970.1	15.98	0.00932	0.0166	20.9302325581395|19.1780821917808|13.0952380952381	29.1666666666667|34.4827586206897|37.5	Chr3_11745323_11745994_S_Ex.TSS.AT3G29970.1_1
Chr2:11696800-11697647	AT2G27340	Chr2:11696937-11697554	SES	3	3	-	AT2G27340.2	15.74	0.00528	0.00743	31.5789473684211|33.3333333333333|31.1111111111111	42.8571428571429|52.4590163934426|47.9166666666667	Chr2_11696800_11697647_W_AT2G27340.2_1
Chr2:16931048-16931412	AT2G40540	Chr2:16931048-16931164	TSS|A5SS	3	3	-	TSS.ONT.6283.3	15.44	0.008	0.0123	19.1176470588235|18.3333333333333|21.1111111111111	40|35.3846153846154|29.5081967213115	Chr2_16931048_16931412_S_TSS.ONT.6283.3_1
Chr2:18700898-18701536	AT2G45380	Chr2:18701098-18701145	SES	3	3	-	AT2G45380.1	15.24	0.000721	0.00115	61.4255765199161|64.7749510763209|59.4810379241517	78.0346820809249|76.3113367174281|77.0408163265306	Chr2_18700898_18701536_W_AT2G45380.1_1
Chr4:5378203-5380530	AT4G08460	Chr4:5378698-5378832	SES	3	3	-	ONT.13664.1	14.99	0.00144	0.00549	18.3098591549296|19.5238095238095|19.1489361702128	33.112582781457|37.593984962406|31.25	Chr4_5378203_5380530_W_ONT.13664.1_1
Chr4:17294431-17294703	AT4G36690	Chr4:17294431-17294603	A3SS	3	3	-	AT4G36690.3	14.7	0.00932	0.0324	50.7462686567164|44.8979591836735|40.3225806451613	58.59375|60|61.4814814814815	Chr4_17294431_17294703_S_AT4G36690.3_1
Chr3:15201262-15201606	AT3G43220	Chr3:15201262-15201331	A3SS	3	3	-	ONT.11202.2	14.37	0.00865	0.0156	12.9032258064516|12.7272727272727|15.1515151515152	22.2222222222222|31.4285714285714|30.2325581395349	Chr3_15201262_15201606_S_ONT.11202.2_1
Chr4:18014797-18015065	AT4G38510	Chr4:18014903-18014975	SES	3	3	-	AT4G38510.3	14.17	0.000282	0.00101	53.8759689922481|53.0379746835443|53.5612535612536	65.3421633554084|68.7116564417178|68.9342403628118	Chr4_18014797_18015065_W_AT4G38510.3_1
Chr3:22901256-22902053	AT3G61860	Chr3:22901256-22901768	A3SS	3	3	-	ONT.11906.1	13.88	0.00119	0.00252	43.3884297520661|39.0396659707724|44.4191343963554	55.7422969187675|55.8823529411765|56.875	Chr3_22901256_22902053_S_ONT.11906.1_1
Chr1:27232546-27232878	AT1G72320	Chr1:27232546-27232610	TSS|A3SS	3	3	-	TSS.AT1G72320.1	13.64	7.02e-05	8.27e-05	77.5|79.2452830188679|78.5714285714286	93.0232558139535|92.3076923076923|90.9090909090909	Chr1_27232546_27232878_S_TSS.AT1G72320.1_1
Chr1:27232537-27232878	AT1G72320	Chr1:27232537-27232610	TSS|A3SS	3	3	-	TSS.AT1G72320.1	13.64	7.02e-05	8.27e-05	77.5|79.2452830188679|78.5714285714286	93.0232558139535|92.3076923076923|90.9090909090909	Chr1_27232537_27232878_S_TSS.AT1G72320.1_1
Chr2:8951470-8951575	AT2G20790	Chr2:8951572-8951576	A5SS	3	3	-	Ex.AT2G20790.1	13.06	8.57e-05	0.000148	3.38983050847458|5.33333333333333|2.73972602739726	16.6666666666667|16.6666666666667|17.3076923076923	Chr2_8951470_8951575_S_Ex.AT2G20790.1_1
Chr1:3630065-3630278	AT1G10890	Chr1:3630255-3630278	TSS|A3SS	3	3	-	TSS.AT1G10890.1	12.7	0.00024	0.0003	75.6521739130435|73.4513274336283|73.2	85.4838709677419|87.5|87.431693989071	Chr1_3630065_3630278_S_TSS.AT1G10890.1_1
Chr4:241156-241458	AT4G00560	Chr4:241156-241370	A3SS	3	3	-	AT4G00560.3	12.07	0.00115	0.00425	73.6842105263158|75.4385964912281|72.1428571428571	85.3754940711462|84.1860465116279|87.9166666666667	Chr4_241156_241458_S_AT4G00560.3_1
Chr2:14964750-14965245	AT2G35620	Chr2:14964750-14964772	TSS|A3SS	3	3	-	TSS.AT2G35620.1	12.06	0.00691	0.0102	59.2105263157895|57.4712643678161|59.6491228070175	75|67.2131147540984|70.3125	Chr2_14964750_14965245_S_TSS.AT2G35620.1_1
Chr2:14964746-14965245	AT2G35620	Chr2:14964746-14964772	TSS|A3SS	3	3	-	TSS.AT2G35620.1	12.06	0.00691	0.0102	59.2105263157895|57.4712643678161|59.6491228070175	75|67.2131147540984|70.3125	Chr2_14964746_14965245_S_TSS.AT2G35620.1_1
Chr4:241156-241458	AT4G00560	Chr4:241247-241370	SES	3	3	-	AT4G00560.1	11.75	0.000425	0.00157	70.7602339181287|72.5947521865889|69.4244604316547	82.0717131474104|82.093023255814|83.8574423480084	Chr4_241156_241458_W_AT4G00560.1_1
Chr3:22901256-22902053	AT3G61860	Chr3:22901376-22901768	SES	3	3	-	ONT.11906.3	11.57	0.000974	0.00207	28.7937743190661|25.6997455470738|29.7841726618705	39.272030651341|39.0243902439024|40.6852248394004	Chr3_22901256_22902053_W_ONT.11906.3_1
Chr1:18357365-18357970	AT1G49600	Chr1:18357545-18357971	A5SS	3	3	-	Ex.TSS.AT1G49600.1	11.44	0.00032	0.000339	12.2448979591837|13.953488372093|12.7450980392157	26.1194029850746|23.6111111111111|23.5294117647059	Chr1_18357365_18357970_S_Ex.TSS.AT1G49600.1_1
Chr4:241156-241253	AT4G00560	Chr4:241247-241253	A5SS	3	3	-	Ex.AT4G00560.1	11.4	0.00032	0.00118	67.8362573099415|69.7674418604651|66.6666666666667	78.714859437751|80|79.746835443038	Chr4_241156_241253_S_Ex.AT4G00560.1_1
Chr3:14309550-14311212	AT3G42150	Chr3:14310554-14311212	A3SS	3	3	-	ONT.9290.4	10.83	0.00357	0.00643	78.7096774193548|82.0987654320988|81.8181818181818	94.1935483870968|89.3854748603352|91.5384615384615	Chr3_14309550_14311212_S_ONT.9290.4_1
Chr1:11134126-11134341	AT1G31170	Chr1:11134213-11134341	TSS|A3SS	3	3	-	TSS.AT1G31170.1	10.73	0.000303	0.00031	87.2146118721461|85.981308411215|84.641638225256	97.4169741697417|95.6363636363636|96.969696969697	Chr1_11134126_11134341_S_TSS.AT1G31170.1_1
Chr1:20294733-20294971	AT1G54370	Chr1:20294825-20294885	SES	3	3	-	AT1G54370.1	10.63	0.0078	0.00844	87.1951219512195|84.2696629213483|81.294964028777	94.375|97.3684210526316|92.9078014184397	Chr1_20294733_20294971_W_AT1G54370.1_1
Chr5:18056394-18056667	AT5G44750	Chr5:18056514-18056585	SES	3	3	-	AT5G44750.2	10.26	0.00643	0.0354	85|83.6734693877551|81.6666666666667	92.9824561403509|91.1764705882353|96.969696969697	Chr5_18056394_18056667_W_AT5G44750.2_1
Chr1:30217576-30217862	AT1G80380	Chr1:30217576-30217632	TSS|A5SS	3	3	-	TSS.AT1G80380.3	10.16	1.85e-05	2.28e-05	0.387596899224806|0.404858299595142|0.930232558139535	11.4488348530902|10.1135190918473|10.6430155210643	Chr1_30217576_30217862_S_TSS.AT1G80380.3_1
Chr4:16839703-16839844	AT4G35450	Chr4:16839703-16839746	TSS|A5SS	3	3	-	TSS.AT4G35450.3	10.14	0.00334	0.0114	53.6866359447005|55.8295964125561|50.3416856492027	62.9909365558912|63.9664804469274|63.3228840125392	Chr4_16839703_16839844_S_TSS.AT4G35450.3_1
Chr5:26449060-26449139	AT5G66180	Chr5:26449060-26449064	TSS|A5SS	3	3	-	TSS.AT5G66180.2	10.02	0.00787	0.0856	81.3559322033898|76.4705882352941|83.0508474576271	90.4761904761905|89.3939393939394|91.0714285714286	Chr5_26449060_26449139_S_TSS.AT5G66180.2_1
Chr4:6308817-6309084	AT4G10100	Chr4:6308817-6308832	A5SS	3	3	-	Ex.AT4G10100.2	-10.05	0.00599	0.0232	41.4893617021277|35.678391959799|37.5	29.7297297297297|27.5862068965517|27.2058823529412	Chr4_6308817_6309084_S_Ex.AT4G10100.2_1
Chr5:2854941-2855640	AT5G08760	Chr5:2855283-2855396	IR	3	3	-	ONT.15279.4	-10.08	0.00019	0.00229	11.5789473684211|9.10099889012209|9.54545454545455	0|0|0	Chr5_2855283_2855396_R_ONT.15279.4_1
Chr4:18273973-18275017	AT4G39260	Chr4:18274570-18274855	IR	3	3	-	ONT.14900.3	-10.09	2.89e-05	0.000104	9.55214531788287|11.0379346680717|9.68566317403527	0|0|0	Chr4_18274570_18274855_R_ONT.14900.3_1
Chr4:18273973-18275017	AT4G39260	Chr4:18274570-18274848	IR	3	3	-	ONT.14900.3	-10.09	2.89e-05	0.000104	9.55214531788287|11.0379346680717|9.68566317403527	0|0|0	Chr4_18274570_18274848_R_ONT.14900.3_1
Chr4:18273973-18275017	AT4G39260	Chr4:18274568-18274850	IR	3	3	-	ONT.14900.3	-10.09	2.89e-05	0.000104	9.55214531788287|11.0379346680717|9.68566317403527	0|0|0	Chr4_18274568_18274850_R_ONT.14900.3_1
Chr4:18273957-18275016	AT4G39260	Chr4:18274568-18274692	IR	3	3	-	Ex.ONT.14900.2	-10.11	2.98e-05	0.000108	9.55214531788287|11.0613642349223|9.70873786407767	0|0|0	Chr4_18274568_18274692_R_Ex.ONT.14900.2_1
Chr3:19569404-19570687	AT3G52800	Chr3:19569520-19569762	IR	3	3	-	ONT.9616.3	-10.12	8.69e-05	0.000169	10.0108813928183|9.09090909090909|11.2589559877175	0|0|0	Chr3_19569520_19569762_R_ONT.9616.3_1
Chr3:22044088-22046040	AT3G59680	Chr3:22044297-22045255	IR	3	3	-	Ex.AT3G59680.2	-10.13	0.00524	0.0109	6.66666666666667|10.8108108108108|12.9032258064516	0|0|0	Chr3_22044297_22045255_R_Ex.AT3G59680.2_1
Chr2:15605889-15608454	AT2G37150	Chr2:15605994-15608306	IR	3	3	-	Ex.AT2G37150.1	-10.13	0.0056	0.00842	11.1111111111111|12.7659574468085|6.52173913043478	0|0|0	Chr2_15605994_15608306_R_Ex.AT2G37150.1_1
Chr3:4240740-4241961	AT3G13190	Chr3:4240841-4240943	IR	3	3	-	Ex.AT3G13190.1	-10.19	0.00508	0.0117	13.6363636363636|9.52380952380952|7.40740740740741	0|0|0	Chr3_4240841_4240943_R_Ex.AT3G13190.1_1
Chr5:20106653-20107191	AT5G49550	Chr5:20107002-20107072	IR	3	3	-	Ex.AT5G49550.1	-10.26	7.42e-05	0.000461	9.52380952380952|9.78260869565217|11.4754098360656	0|0|0	Chr5_20107002_20107072_R_Ex.AT5G49550.1_1
Chr5:20106631-20107210	AT5G49550	Chr5:20106983-20107072	IR	3	3	-	Ex.ONT.18763.3	-10.26	7.42e-05	0.000461	9.52380952380952|9.78260869565217|11.4754098360656	0|0|0	Chr5_20106983_20107072_R_Ex.ONT.18763.3_1
Chr5:23672278-23672877	AT5G58560	Chr5:23672633-23672724	IR	3	3	-	AT5G58560.1	-10.29	2.91e-05	0.000237	10.5691056910569|9.34579439252336|10.9540636042403	0|0|0	Chr5_23672633_23672724_R_AT5G58560.1_1
Chr2:10205008-10206408	AT2G23985	Chr2:10205694-10206112	IR	3	3	-	ONT.5665.14	-10.3	0.00405	0.00551	10.2564102564103|13.3333333333333|7.31707317073171	0|0|0	Chr2_10205694_10206112_R_ONT.5665.14_1
Chr2:10205008-10206408	AT2G23985	Chr2:10205694-10206109	IR	3	3	-	ONT.5665.14	-10.3	0.00405	0.00551	10.2564102564103|13.3333333333333|7.31707317073171	0|0|0	Chr2_10205694_10206109_R_ONT.5665.14_1
Chr1:19945959-19946982	AT1G53440	Chr1:19946059-19946804	IR	3	3	-	Ex.AT1G53440.1	-10.3	4.51e-05	4.85e-05	10|11.3513513513514|9.54773869346734	0|0|0	Chr1_19946059_19946804_R_Ex.AT1G53440.1_1
Chr1:7088015-7089210	AT1G20450	Chr1:7088688-7088777	IR (overlapping region)	3	3	-	ONT.3399.1	-10.33	2.5e-05	3.28e-05	11.2568306010929|9.96677740863787|9.7609561752988	0|0|0	Chr1_7088688_7088777_R_ONT.3399.1_1
Chr4:18273973-18275017	AT4G39260	Chr4:18274559-18274848	IR	3	3	-	ONT.14900.3	-10.35	3.44e-05	0.000124	9.77564102564103|11.3667117726658|9.91627420198849	0|0|0	Chr4_18274559_18274848_R_ONT.14900.3_1
Chr4:18273973-18275017	AT4G39260	Chr4:18274556-18274848	IR	3	3	-	ONT.14900.3	-10.35	3.44e-05	0.000124	9.77564102564103|11.3667117726658|9.91627420198849	0|0|0	Chr4_18274556_18274848_R_ONT.14900.3_1
Chr1:17394765-17395673	AT1G47410	Chr1:17394965-17395085	IR	3	3	-	Ex.AT1G47410.1	-10.44	1.5e-05	1.58e-05	11.1111111111111|9.67741935483871|10.5263157894737	0|0|0	Chr1_17394965_17395085_R_Ex.AT1G47410.1_1
Chr1:2877678-2879182	AT1G08940	Chr1:2878151-2878715	IR (overlapping region)	3	3	-	ONT.319.2	-10.47	0.0012	0.00144	10.8974358974359|8.07453416149068|12.4260355029586	0|0|0	Chr1_2878151_2878715_R_ONT.319.2_1
Chr3:8309210-8309833	AT3G23250	Chr3:8309625-8309703	IR	3	3	-	AT3G23250.2	-10.51	0.0076	0.0195	7.9136690647482|14.6853146853147|8.9171974522293	0|0|0	Chr3_8309625_8309703_R_AT3G23250.2_1
Chr4:13344853-13346597	AT4G26400	Chr4:13346068-13346387	IR	3	3	-	ONT.14351.3	-10.59	0.00232	0.00683	10.5263157894737|13.2743362831858|7.95454545454545	0|0|0	Chr4_13346068_13346387_R_ONT.14351.3_1
Chr4:13344848-13346574	AT4G26400	Chr4:13346068-13346404	IR	3	3	-	Ex.AT4G26400.2	-10.59	0.00232	0.00683	10.5263157894737|13.2743362831858|7.95454545454545	0|0|0	Chr4_13346068_13346404_R_Ex.AT4G26400.2_1
Chr1:8188226-8189199	ONT.922	Chr1:8188456-8188540	IR (overlapping region)	3	3	-	ONT.922.1	-10.59	0.00466	0.00624	13.9917695473251|7.60869565217391|10.15625	0|0|0	Chr1_8188456_8188540_R_ONT.922.1_1
Chr1:28372121-28373191	AT1G75560	Chr1:28372563-28372748	SES	3	3	-	AT1G75560.1	-10.62	0.00363	0.00435	87.7721943048576|93.1993817619784|88.5714285714286	79.1489361702128|79.9564270152505|78.5714285714286	Chr1_28372121_28373191_W_AT1G75560.1_1
Chr3:20514855-20514936	AT3G55330	Chr3:20514855-20514863	A3SS	3	3	-	AT3G55330.1	-10.63	0.00903	0.018	90.2439024390244|88.4615384615385|94.0476190476191	81.5909090909091|77.2522522522522|82.0143884892086	Chr3_20514855_20514936_S_AT3G55330.1_1
Chr1:7768043-7770135	AT1G22040	Chr1:7768052-7768345	IR	3	3	-	ONT.874.3	-10.63	0.000389	0.000518	11.4942528735632|8.69565217391304|11.6883116883117	0|0|0	Chr1_7768052_7768345_R_ONT.874.3_1
Chr4:10588973-10589071	AT4G19420	Chr4:10588973-10588992	A3SS	3	3	-	AT4G19420.1	-10.66	0.00446	0.0121	86.5853658536585|85.2941176470588|87.2093023255814	76.6233766233766|72.3076923076923|78.1818181818182	Chr4_10588973_10589071_S_AT4G19420.1_1
Chr3:17577348-17579577	AT3G47680	Chr3:17578462-17578687	IR (overlapping region)	3	3	-	Ex.ONT.11344.7	-10.67	0.000539	0.001	10.2564102564103|12.6760563380282|9.09090909090909	0|0|0	Chr3_17578462_17578687_R_Ex.ONT.11344.7_1
Chr1:12550957-12552629	AT1G34370	Chr1:12551268-12551361	IR	3	3	-	AT1G34370.1	-10.67	0.000284	0.000294	9.49152542372881|10.0946372239748|12.4277456647399	0|0|0	Chr1_12551268_12551361_R_AT1G34370.1_1
Chr4:12612536-12613719	AT4G24380	Chr4:12612779-12612854	IR	3	3	-	ONT.12793.2	-10.71	0.00281	0.00803	12.8571428571429|7.5|11.7647058823529	0|0|0	Chr4_12612779_12612854_R_ONT.12793.2_1
Chr3:19425676-19427094	AT3G52400	Chr3:19426290-19426461	IR	3	3	-	ONT.11534.2	-10.71	5.62e-08	1.09e-07	10.7954545454545|10.5|10.8333333333333	0|0|0	Chr3_19426290_19426461_R_ONT.11534.2_1
Chr1:25508689-25510898	AT1G68050	Chr1:25509009-25509109	IR	3	3	-	ONT.2063.1	-10.73	0.00146	0.00168	13.2075471698113|8.45070422535211|10.5263157894737	0|0|0	Chr1_25509009_25509109_R_ONT.2063.1_1
Chr3:6092254-6093151	AT3G17800	Chr3:6092565-6092729	IR	3	3	-	Ex.AT3G17800.1	-10.8	0.00134	0.00328	13.5057471264368|9.62962962962963|9.27601809954751	0|0|0	Chr3_6092565_6092729_R_Ex.AT3G17800.1_1
Chr3:6092254-6093151	AT3G17800	Chr3:6092565-6092711	IR	3	3	-	Ex.AT3G17800.2	-10.8	0.00134	0.00328	13.5057471264368|9.62962962962963|9.27601809954751	0|0|0	Chr3_6092565_6092711_R_Ex.AT3G17800.2_1
Chr5:18138938-18140150	AT5G44920	Chr5:18139468-18139729	IR (overlapping region)	3	3	-	ONT.16324.3	-10.99	0.000205	0.00113	10.8910891089109|9.56521739130435|12.5	0|0|0	Chr5_18139468_18139729_R_ONT.16324.3_1
Chr3:4376395-4376948	AT3G13437	Chr3:4376490-4376576	IR	3	3	-	ONT.8600.4	-10.99	0.00581	0.0134	14.9659863945578|9.83606557377049|8.16326530612245	0|0|0	Chr3_4376490_4376576_R_ONT.8600.4_1
Chr3:19203993-19204089	AT3G51770	Chr3:19203993-19203998	TSS|A3SS	3	3	-	TSS.AT3G51770.2	-11.04	0.000574	0.0011	79.2452830188679|80|79.1044776119403	70.3703703703704|68.1818181818182|66.6666666666667	Chr3_19203993_19204089_S_TSS.AT3G51770.2_1
Chr5:7372235-7373099	AT5G22270	Chr5:7372817-7373040	IR	3	3	-	ONT.18041.1	-11.09	0.00183	0.0697	13.8020833333333|10.8910891089109|8.58369098712446	0|0|0	Chr5_7372817_7373040_R_ONT.18041.1_1
Chr4:12613161-12613717	AT4G24380	Chr4:12613291-12613377	IR (overlapping region)	3	3	-	AT4G24380.2	-11.13	0.00235	0.00672	12.8571428571429|7.89473684210526|12.6436781609195	0|0|0	Chr4_12613291_12613377_R_AT4G24380.2_1
Chr1:12550957-12552629	AT1G34370	Chr1:12551420-12551535	IR	3	3	-	AT1G34370.1	-11.15	0.000128	0.000132	10.4026845637584|10.377358490566|12.6801152737752	0|0|0	Chr1_12551420_12551535_R_AT1G34370.1_1
Chr1:24058038-24058655	AT1G64770	Chr1:24058473-24058588	IR	3	3	-	Ex.AT1G64770.3	-11.16	0.00978	0.011	7.69230769230769|10|15.7894736842105	0|0|0	Chr1_24058473_24058588_R_Ex.AT1G64770.3_1
Chr2:17377566-17377929	AT2G41680	Chr2:17377566-17377588	A3SS	3	3	-	ONT.7842.1	-11.17	0.000775	0.0012	21.6981132075472|21.0526315789474|21.2962962962963	8.78048780487805|9.17874396135266|12.5628140703518	Chr2_17377566_17377929_S_ONT.7842.1_1
Chr4:12612536-12613719	AT4G24380	Chr4:12613077-12613160	IR (overlapping region)	3	3	-	ONT.12793.2	-11.19	0.00248	0.00711	13.0434782608696|7.89473684210526|12.6436781609195	0|0|0	Chr4_12613077_12613160_R_ONT.12793.2_1
Chr5:8228892-8229285	AT5G24230	Chr5:8228975-8229152	IR	3	3	-	Ex.AT5G24230.1	-11.23	0.000844	0.049	13.6363636363636|10.5882352941176|9.45945945945946	0|0|0	Chr5_8228975_8229152_R_Ex.AT5G24230.1_1
Chr5:2854941-2855640	AT5G08760	Chr5:2855049-2855219	IR	3	3	-	ONT.15279.4	-11.24	0.000245	0.00296	13.0434782608696|10.1485148514851|10.5263157894737	0|0|0	Chr5_2855049_2855219_R_ONT.15279.4_1
Chr5:2854941-2855640	AT5G08760	Chr5:2855044-2855219	IR	3	3	-	ONT.15279.4	-11.24	0.000245	0.00296	13.0434782608696|10.1485148514851|10.5263157894737	0|0|0	Chr5_2855044_2855219_R_ONT.15279.4_1
Chr3:20916172-20920641	AT3G56410	Chr3:20916597-20919494	IR (overlapping region)	3	3	-	AT3G56410.1	-11.26	0.00194	0.00391	14.2857142857143|9.09090909090909|10.4166666666667	0|0|0	Chr3_20916597_20919494_R_AT3G56410.1_1
Chr5:25913044-25914008	AT5G64816	Chr5:25913064-25913432	IR	3	3	-	ONT.17098.3	-11.34	0.00582	0.0577	14.5454545454545|7.35294117647059|12.1212121212121	0|0|0	Chr5_25913064_25913432_R_ONT.17098.3_1
Chr5:25913028-25914003	AT5G64816	Chr5:25913064-25913456	IR	3	3	-	Ex.AT5G64816.1	-11.34	0.00582	0.0577	14.5454545454545|7.35294117647059|12.1212121212121	0|0|0	Chr5_25913064_25913456_R_Ex.AT5G64816.1_1
Chr2:1582032-1582317	AT2G04540	Chr2:1582118-1582220	SES	3	3	-	ONT.6745.3	-11.34	7.2e-05	0.000109	63.8297872340426|62.962962962963|62.962962962963	52.5423728813559|52.5|50.7042253521127	Chr2_1582032_1582317_W_ONT.6745.3_1
Chr3:3931580-3933350	AT3G12350	Chr3:3932457-3932666	IR	3	3	-	ONT.8562.3	-11.36	6.11e-06	1.39e-05	11.4583333333333|10.6870229007634|11.9266055045872	0|0|0	Chr3_3932457_3932666_R_ONT.8562.3_1
Chr3:5074753-5075134	AT3G15080	Chr3:5075127-5075134	A3SS	3	3	-	Ex.AT3G15080.1	-11.37	0.00575	0.0136	95|92.9824561403509|91.5254237288136	81.8181818181818|78.5714285714286|85	Chr3_5074753_5075134_S_Ex.AT3G15080.1_1
Chr3:17197631-17199244	AT3G46690	Chr3:17198638-17198716	IR	3	3	-	ONT.11304.2	-11.39	0.000258	0.000475	10.4477611940298|10.4651162790698|13.2530120481928	0|0|0	Chr3_17198638_17198716_R_ONT.11304.2_1
Chr4:10453422-10454451	AT4G19100	Chr4:10453510-10453633	IR (overlapping region)	3	3	-	ONT.12594.4	-11.43	0.00947	0.0256	15.9090909090909|10.8695652173913|7.5	0|0|0	Chr4_10453510_10453633_R_ONT.12594.4_1
Chr4:10453415-10454359	AT4G19100	Chr4:10453510-10453771	IR (overlapping region)	3	3	-	Ex.AT4G19100.1	-11.43	0.00947	0.0256	15.9090909090909|10.8695652173913|7.5	0|0|0	Chr4_10453510_10453771_R_Ex.AT4G19100.1_1
Chr2:9265280-9266371	AT2G21660	Chr2:9265896-9266200	IR	3	3	-	ONT.7034.8	-11.43	6.92e-06	1.19e-05	12.1671826625387|11.2107623318386|10.9259765091505	0|0|0	Chr2_9265896_9266200_R_ONT.7034.8_1
Chr2:9265280-9266371	AT2G21660	Chr2:9265894-9266202	IR	3	3	-	ONT.7034.8	-11.43	6.92e-06	1.19e-05	12.1671826625387|11.2107623318386|10.9259765091505	0|0|0	Chr2_9265894_9266202_R_ONT.7034.8_1
Chr2:9265253-9266371	AT2G21660	Chr2:9265894-9266036	IR	3	3	-	Ex.ONT.7034.2	-11.44	8.78e-06	1.51e-05	12.2215346534653|11.1609646662928|10.9259765091505	0|0|0	Chr2_9265894_9266036_R_Ex.ONT.7034.2_1
Chr5:964439-967427	AT5G03690	Chr5:964667-967315	IR	3	3	-	Ex.ONT.17333.2	-11.47	0.00396	1	11.7647058823529|8|14.6341463414634	0|0|0	Chr5_964667_967315_R_Ex.ONT.17333.2_1
Chr4:12612536-12613719	AT4G24380	Chr4:12612954-12613034	IR	3	3	-	ONT.12793.2	-11.49	0.00221	0.00633	13.4328358208955|8.21917808219178|12.8205128205128	0|0|0	Chr4_12612954_12613034_R_ONT.12793.2_1
Chr1:27232537-27232878	AT1G72320	Chr1:27232537-27232545	TSS|A3SS	3	3	-	TSS.AT1G72320.2	-11.51	7.22e-05	8.5e-05	17.5|18.8679245283019|19.6428571428571	6.97674418604651|7.69230769230769|6.81818181818182	Chr1_27232537_27232878_S_TSS.AT1G72320.2_1
Chr2:10906460-10907279	AT2G25625	Chr2:10906663-10906744	IR	3	3	-	Ex.AT2G25625.2	-11.52	0.0019	0.00263	14.3939393939394|11.2359550561798|8.92857142857143	0|0|0	Chr2_10906663_10906744_R_Ex.AT2G25625.2_1
Chr1:27979103-27980341	AT1G74440	Chr1:27979488-27979575	IR	3	3	-	ONT.4843.2	-11.58	0.00827	0.00984	15.3846153846154|7.19424460431655|12.1621621621622	0|0|0	Chr1_27979488_27979575_R_ONT.4843.2_1
Chr4:18273957-18274567	AT4G39260	Chr4:18274279-18274470	IR	3	3	-	ONT.14900.2	-11.65	9.04e-06	3.26e-05	11.6549403487305|12.3540098624448|10.9375	0|0|0	Chr4_18274279_18274470_R_ONT.14900.2_1
Chr2:9265280-9266371	AT2G21660	Chr2:9265885-9266200	IR	3	3	-	ONT.7034.8	-11.65	7.93e-06	1.37e-05	12.4133585381222|11.4351057747284|11.0926234054354	0|0|0	Chr2_9265885_9266200_R_ONT.7034.8_1
Chr2:10205008-10206408	AT2G23985	Chr2:10205254-10206112	IR	3	3	-	ONT.5665.14	-11.73	0.00764	0.0104	15.3846153846154|12.5|7.31707317073171	0|0|0	Chr2_10205254_10206112_R_ONT.5665.14_1
Chr4:3940332-3940614	ONT.13646	Chr4:3940466-3940614	TSS|A5SS	3	3	-	TSS.ONT.13646.4	-11.74	0.00991	0.0374	76.1904761904762|69.6078431372549|70.5882352941177	61.5384615384615|62.2222222222222|57.4074074074074	Chr4_3940332_3940614_S_TSS.ONT.13646.4_1
Chr3:17772057-17773127	AT3G48120	Chr3:17772701-17773075	IR (overlapping region)	3	3	-	Ex.AT3G48120.1	-11.74	0.00101	0.00187	13.6363636363636|9.09090909090909|12.5	0|0|0	Chr3_17772701_17773075_R_Ex.AT3G48120.1_1
Chr5:24653352-24654869	AT5G61310	Chr5:24653753-24654844	IR	3	3	-	Ex.AT5G61310.4	-11.77	4.2e-05	0.000364	11.7647058823529|10.7142857142857|12.8205128205128	0|0|0	Chr5_24653753_24654844_R_Ex.AT5G61310.4_1
Chr4:3940332-3940614	ONT.13646	Chr4:3940466-3940510	SES	3	3	-	ONT.13646.1	-11.85	0.00276	0.0104	70.6766917293233|66.0818713450292|68.0555555555556	58.3333333333333|56.7567567567568|54.1666666666667	Chr4_3940332_3940614_W_ONT.13646.1_1
Chr3:17760169-17760809	AT3G48100	Chr3:17760487-17760589	IR	3	3	-	ONT.11364.2	-11.85	0.00357	0.00664	11|15.5339805825243|9.00900900900901	0|0|0	Chr3_17760487_17760589_R_ONT.11364.2_1
Chr1:2249134-2250491	AT1G07320	Chr1:2250026-2250172	IR (overlapping region)	3	3	-	Ex.AT1G07320.4	-11.88	0.000151	0.000168	10.6382978723404|13.5021097046413|11.5	0|0|0	Chr1_2250026_2250172_R_Ex.AT1G07320.4_1
Chr1:2249133-2250529	AT1G07320	Chr1:2250022-2250172	IR (overlapping region)	3	3	-	Ex.AT1G07320.1	-11.88	0.000151	0.000168	10.6382978723404|13.5021097046413|11.5	0|0|0	Chr1_2250022_2250172_R_Ex.AT1G07320.1_1
Chr2:10066163-10067734	AT2G23680	Chr2:10066361-10066452	IR	3	3	-	ONT.5655.5	-11.91	0.000128	0.000176	13.2596685082873|12.0418848167539|10.4395604395604	0|0|0	Chr2_10066361_10066452_R_ONT.5655.5_1
Chr2:10066163-10067734	AT2G23680	Chr2:10066359-10066452	IR	3	3	-	ONT.5655.5	-11.91	0.000128	0.000176	13.2596685082873|12.0418848167539|10.4395604395604	0|0|0	Chr2_10066359_10066452_R_ONT.5655.5_1
Chr2:19349425-19350562	AT2G47130	Chr2:19350392-19350472	IR	3	3	-	ONT.8067.2	-11.93	0.00192	0.0031	11.3333333333333|15.028901734104|9.42408376963351	0|0|0	Chr2_19350392_19350472_R_ONT.8067.2_1
Chr2:19349425-19350562	AT2G47130	Chr2:19350387-19350467	IR	3	3	-	ONT.8067.2	-11.93	0.00192	0.0031	11.3333333333333|15.028901734104|9.42408376963351	0|0|0	Chr2_19350387_19350467_R_ONT.8067.2_1
Chr2:19349425-19350562	AT2G47130	Chr2:19350387-19350463	IR	3	3	-	ONT.8067.2	-11.93	0.00192	0.0031	11.3333333333333|15.028901734104|9.42408376963351	0|0|0	Chr2_19350387_19350463_R_ONT.8067.2_1
Chr3:17760169-17760809	AT3G48100	Chr3:17760313-17760406	IR	3	3	-	ONT.11364.2	-11.94	0.00375	0.00697	11.1111111111111|15.6862745098039|9.00900900900901	0|0|0	Chr3_17760313_17760406_R_ONT.11364.2_1
Chr2:12617936-12618467	AT2G29420	Chr2:12618080-12618300	IR	3	3	-	AT2G29420.1	-12.06	0.00826	0.0117	16.4948453608247|11.7647058823529|7.92079207920792	0|0|0	Chr2_12618080_12618300_R_AT2G29420.1_1
Chr5:310086-312097	AT5G01810	Chr5:311309-311443	IR	3	3	-	AT5G01810.1	-12.1	2.23e-06	2.84e-05	12.6984126984127|11.7647058823529|11.8421052631579	0|0|0	Chr5_311309_311443_R_AT5G01810.1_1
Chr2:7401233-7401632	AT2G17033	Chr2:7401233-7401235	A5SS	3	3	-	Ex.TSS.AT2G17033.2	-12.15	0.00455	0.00767	52.0833333333333|57.8947368421053|51.7241379310345	41.304347826087|40.8450704225352|43.1034482758621	Chr2_7401233_7401632_S_Ex.TSS.AT2G17033.2_1
Chr1:12051739-12052559	ONT.1241	Chr1:12052117-12052198	IR (overlapping region)	3	3	-	ONT.1241.1	-12.23	0.000834	0.00086	13.6363636363636|13.5416666666667|9.52380952380952	0|0|0	Chr1_12052117_12052198_R_ONT.1241.1_1
Chr1:12051739-12052559	ONT.1241	Chr1:12052113-12052198	IR (overlapping region)	3	3	-	ONT.1241.1	-12.23	0.000834	0.00086	13.6363636363636|13.5416666666667|9.52380952380952	0|0|0	Chr1_12052113_12052198_R_ONT.1241.1_1
Chr3:21406496-21407525	AT3G57790	Chr3:21407217-21407458	IR	3	3	-	ONT.11763.1	-12.25	0.00691	0.0141	16.9491525423729|9.09090909090909|10.7142857142857	0|0|0	Chr3_21407217_21407458_R_ONT.11763.1_1
Chr3:16790816-16791134	AT3G45740	Chr3:16790937-16791030	IR	3	3	-	ONT.9354.1	-12.26	0.00284	0.0052	13.5135135135135|8.57142857142857|14.7058823529412	0|0|0	Chr3_16790937_16791030_R_ONT.9354.1_1
Chr2:18701146-18701536	AT2G45380	Chr2:18701241-18701377	SES	3	3	-	ONT.7995.2	-12.28	0.00284	0.00452	19.2982456140351|17.0731707317073|22.9074889867841	6.32183908045977|9.02061855670103|7.08860759493671	Chr2_18701146_18701536_W_ONT.7995.2_1
Chr1:2249133-2250527	AT1G07320	Chr1:2250022-2250178	IR (overlapping region)	3	3	-	Ex.AT1G07320.2	-12.29	0.000136	0.000152	11.1731843575419|13.9737991266376|11.734693877551	0|0|0	Chr1_2250022_2250178_R_Ex.AT1G07320.2_1
Chr3:19407120-19407406	AT3G52340	Chr3:19407205-19407274	SES	3	3	-	AT3G52340.1	-12.32	0.00655	0.0123	42.7860696517413|48.9010989010989|41.1428571428571	31.9066147859922|32.4|31.5589353612167	Chr3_19407120_19407406_W_AT3G52340.1_1
Chr4:7537283-7538276	AT4G12850	Chr4:7537425-7538081	IR	3	3	-	Ex.AT4G12850.3	-12.34	0.00231	0.00932	15.7894736842105|9.80392156862745|11.4285714285714	0|0|0	Chr4_7537425_7538081_R_Ex.AT4G12850.3_1
Chr1:24306667-24307501	AT1G65440	Chr1:24307325-24307474	IR	3	3	-	AT1G65440.1	-12.35	0.00853	0.00967	7.40740740740741|16|13.6363636363636	0|0|0	Chr1_24307325_24307474_R_AT1G65440.1_1
Chr5:1084224-1086722	AT5G04020	Chr5:1086168-1086268	IR	3	3	-	Ex.ONT.17349.2	-12.39	0.00885	0.0402	17.3076923076923|8.47457627118644|11.3924050632911	0|0|0	Chr5_1086168_1086268_R_Ex.ONT.17349.2_1
Chr5:1082468-1086672	AT5G04020	Chr5:1086168-1086267	IR	3	3	-	Ex.ONT.17349.1	-12.39	0.00885	0.0402	17.3076923076923|8.47457627118644|11.3924050632911	0|0|0	Chr5_1086168_1086267_R_Ex.ONT.17349.1_1
Chr5:1081938-1086546	AT5G04020	Chr5:1086168-1086246	IR	3	3	-	Ex.AT5G04020.1	-12.39	0.00885	0.0402	17.3076923076923|8.47457627118644|11.3924050632911	0|0|0	Chr5_1086168_1086246_R_Ex.AT5G04020.1_1
Chr1:27979103-27980341	AT1G74440	Chr1:27979337-27979415	IR	3	3	-	ONT.4843.2	-12.42	0.00929	0.0111	16.6666666666667|7.57575757575758|13.013698630137	0|0|0	Chr1_27979337_27979415_R_ONT.4843.2_1
Chr4:12179994-12180826	AT4G23290	Chr4:12180319-12180447	IR	3	3	-	AT4G23290.2	-12.44	0.000696	0.00196	12.8113879003559|10|14.5098039215686	0|0|0	Chr4_12180319_12180447_R_AT4G23290.2_1
Chr5:8794252-8796688	AT5G25350	Chr5:8794404-8794494	IR (overlapping region)	3	3	-	AT5G25350.1	-12.45	0.000108	0.00909	13.3768352365416|13.1537242472266|10.8247422680412	0|0|0	Chr5_8794404_8794494_R_AT5G25350.1_1
Chr5:8794252-8796688	AT5G25350	Chr5:8794403-8794496	IR (overlapping region)	3	3	-	AT5G25350.1	-12.45	0.000108	0.00909	13.3768352365416|13.1537242472266|10.8247422680412	0|0|0	Chr5_8794403_8794496_R_AT5G25350.1_1
Chr1:27979103-27980341	AT1G74440	Chr1:27979331-27979410	IR	3	3	-	ONT.4843.2	-12.47	0.009	0.0107	16.6666666666667|7.63358778625954|13.1034482758621	0|0|0	Chr1_27979331_27979410_R_ONT.4843.2_1
Chr1:25453929-25455748	AT1G67880	Chr1:25455182-25455381	IR	3	3	-	ONT.4598.2	-12.47	0.000792	0.00091	14.2857142857143|13.3333333333333|9.80392156862745	0|0|0	Chr1_25455182_25455381_R_ONT.4598.2_1
Chr5:4050056-4050347	AT5G12480	Chr5:4050243-4050347	TSS|A5SS	3	3	-	TSS.ONT.17676.2	-12.55	0.00248	0.0375	20.6451612903226|17.4863387978142|21.5469613259669	9.09090909090909|8.33333333333333|4.61538461538462	Chr5_4050056_4050347_S_TSS.ONT.17676.2_1
Chr5:2330399-2332281	AT5G07370	Chr5:2330498-2330784	IR	3	3	-	AT5G07370.4	-12.55	0.00164	0.0115	13.8888888888889|14.5077720207254|9.2485549132948	0|0|0	Chr5_2330498_2330784_R_AT5G07370.4_1
Chr1:5668465-5668944	AT1G16560	Chr1:5668919-5668945	A3SS	3	3	-	Ex.TSS.AT1G16560.1	-12.59	0.00291	0.00375	50.7317073170732|53.5714285714286|50.2645502645503	40|41.0958904109589|35.7142857142857	Chr1_5668465_5668944_S_Ex.TSS.AT1G16560.1_1
Chr3:4367281-4368820	AT3G13430	Chr3:4367426-4367724	IR	3	3	-	Ex.AT3G13430.1	-12.67	0.00241	0.00555	9.09090909090909|13.5922330097087|15.3153153153153	0|0|0	Chr3_4367426_4367724_R_Ex.AT3G13430.1_1
Chr5:22316096-22316565	AT5G54980	Chr5:22316208-22316305	IR	3	3	-	ONT.16712.1	-12.75	0.000104	0.000758	11.1111111111111|13.7931034482759|13.3333333333333	0|0|0	Chr5_22316208_22316305_R_ONT.16712.1_1
Chr2:9265280-9266371	AT2G21660	Chr2:9265491-9266202	IR	3	3	-	ONT.7034.8	-12.93	1.58e-05	2.73e-05	13.9318885448916|12.7078050154973|12.1643835616438	0|0|0	Chr2_9265491_9266202_R_ONT.7034.8_1
Chr2:9265280-9266371	AT2G21660	Chr2:9265485-9266202	IR	3	3	-	ONT.7034.8	-12.94	1.56e-05	2.69e-05	13.9318885448916|12.7323943661972|12.1643835616438	0|0|0	Chr2_9265485_9266202_R_ONT.7034.8_1
Chr3:2645309-2645526	AT3G08710	Chr3:2645309-2645409	A5SS	3	3	-	Ex.TSS.AT3G08710.1	-13.01	0.000218	0.000476	40.0990099009901|39.6694214876033|39.2712550607287	26.2135922330097|28.5714285714286|25.2252252252252	Chr3_2645309_2645526_S_Ex.TSS.AT3G08710.1_1
Chr5:25913044-25914008	AT5G64816	Chr5:25913349-25913456	IR	3	3	-	ONT.17098.3	-13.08	0.00165	0.0164	14.8148148148148|9.61538461538462|14.8148148148148	0|0|0	Chr5_25913349_25913456_R_ONT.17098.3_1
Chr5:21595994-21597734	AT5G53220	Chr5:21596155-21596812	IR	3	3	-	Ex.AT5G53220.3	-13.21	0.00174	0.0121	16.1290322580645|13.5135135135135|10	0|0|0	Chr5_21596155_21596812_R_Ex.AT5G53220.3_1
Chr5:24082989-24083431	AT5G59780	Chr5:24083119-24083229	IR	3	3	-	AT5G59780.1	-13.25	0.00147	0.0122	10.4166666666667|16.304347826087|13.0434782608696	0|0|0	Chr5_24083119_24083229_R_AT5G59780.1_1
Chr5:24082989-24083431	AT5G59780	Chr5:24083119-24083197	IR	3	3	-	AT5G59780.1	-13.25	0.00147	0.0122	10.4166666666667|16.304347826087|13.0434782608696	0|0|0	Chr5_24083119_24083197_R_AT5G59780.1_1
Chr4:11719165-11719709	AT4G22120	Chr4:11719462-11719709	TSS|A5SS	3	3	-	TSS.AT4G22120.1	-13.27	0.00125	0.00348	72.1311475409836|73.1707317073171|68.75	58.6206896551724|59.375|56.25	Chr4_11719165_11719709_S_TSS.AT4G22120.1_1
Chr4:11719165-11719690	AT4G22120	Chr4:11719462-11719690	TSS|A5SS	3	3	-	TSS.AT4G22120.1	-13.27	0.00125	0.00348	72.1311475409836|73.1707317073171|68.75	58.6206896551724|59.375|56.25	Chr4_11719165_11719690_S_TSS.AT4G22120.1_1
Chr3:19822745-19823406	AT3G53470	Chr3:19822943-19823017	IR	3	3	-	Ex.AT3G53470.2	-13.28	0.000881	0.00172	10.7438016528926|13.1782945736434|15.9090909090909	0|0|0	Chr3_19822943_19823017_R_Ex.AT3G53470.2_1
Chr3:19822726-19823493	AT3G53470	Chr3:19822943-19823020	IR	3	3	-	Ex.AT3G53470.1	-13.28	0.000881	0.00172	10.7438016528926|13.1782945736434|15.9090909090909	0|0|0	Chr3_19822943_19823020_R_Ex.AT3G53470.1_1
Chr2:11696800-11697647	AT2G27340	Chr2:11697449-11697554	SES	3	3	-	AT2G27340.3	-13.39	0.00305	0.00429	13.1578947368421|16.6666666666667|17.7777777777778	5.35714285714286|0|2.08333333333333	Chr2_11696800_11697647_W_AT2G27340.3_1
Chr4:8526427-8528010	AT4G14905	Chr4:8526616-8526851	IR	3	3	-	AT4G14905.2	-13.41	0.00671	0.0285	9.23076923076923|18.1818181818182|12.8205128205128	0|0|0	Chr4_8526616_8526851_R_AT4G14905.2_1
Chr2:16778913-16779165	ONT.7778	Chr2:16779042-16779103	IR (overlapping region)	3	3	-	ONT.7778.1	-13.45	0.00993	0.0148	18.75|12.9032258064516|8.69565217391304	0|0|0	Chr2_16779042_16779103_R_ONT.7778.1_1
Chr5:7019821-7020161	AT5G20730	Chr5:7019989-7020070	IR	3	3	-	Ex.AT5G20730.3	-13.51	0.000509	0.0173	11.3207547169811|13.3333333333333|15.8730158730159	0|0|0	Chr5_7019989_7020070_R_Ex.AT5G20730.3_1
Chr5:7019534-7019988	AT5G20730	Chr5:7019730-7019823	IR	3	3	-	Ex.AT5G20730.2	-13.53	0.000552	0.0187	10.9090909090909|15.3846153846154|14.2857142857143	0|0|0	Chr5_7019730_7019823_R_Ex.AT5G20730.2_1
Chr5:7019534-7019988	AT5G20730	Chr5:7019730-7019820	IR	3	3	-	Ex.AT5G20730.1	-13.53	0.000552	0.0187	10.9090909090909|15.3846153846154|14.2857142857143	0|0|0	Chr5_7019730_7019820_R_Ex.AT5G20730.1_1
Chr4:10645998-10647113	AT4G19520	Chr4:10646011-10646630	IR	3	3	-	ONT.14087.2	-13.64	0.00474	0.0129	10.8695652173913|18.4210526315789|11.6279069767442	0|0|0	Chr4_10646011_10646630_R_ONT.14087.2_1
Chr1:1477462-1478870	ONT.2770	Chr1:1477744-1478757	IR	3	3	-	Ex.ONT.2770.11	-13.69	0.00294	0.00306	17.4603174603175|10.1449275362319|13.4615384615385	0|0|0	Chr1_1477744_1478757_R_Ex.ONT.2770.11_1
Chr1:1477461-1478879	ONT.2770	Chr1:1477744-1478755	IR	3	3	-	Ex.ONT.2770.7	-13.69	0.00294	0.00306	17.4603174603175|10.1449275362319|13.4615384615385	0|0|0	Chr1_1477744_1478755_R_Ex.ONT.2770.7_1
Chr5:26615355-26616990	AT5G66675	Chr5:26616575-26616707	IR	3	3	-	AT5G66675.1	-13.73	0.00152	0.017	15.2173913043478|10.1851851851852|15.7894736842105	0|0|0	Chr5_26616575_26616707_R_AT5G66675.1_1
Chr5:9693270-9694841	AT5G27460	Chr5:9694483-9694542	IR	3	3	-	Ex.ONT.18238.2	-13.76	0.000531	0.285	11.5384615384615|16.2162162162162|13.5135135135135	0|0|0	Chr5_9694483_9694542_R_Ex.ONT.18238.2_1
Chr5:9693262-9694840	AT5G27460	Chr5:9694465-9694542	IR	3	3	-	Ex.AT5G27460.1	-13.76	0.000531	0.285	11.5384615384615|16.2162162162162|13.5135135135135	0|0|0	Chr5_9694465_9694542_R_Ex.AT5G27460.1_1
Chr5:7249319-7250460	AT5G21940	Chr5:7249978-7250090	IR	3	3	-	ONT.18027.3	-13.78	0.00438	0.157	18.1034482758621|9.91735537190083|13.3333333333333	0|0|0	Chr5_7249978_7250090_R_ONT.18027.3_1
Chr3:11257684-11258149	AT3G29330	Chr3:11257953-11258053	IR	3	3	-	AT3G29330.2	-13.81	0.000209	0.000372	14.2857142857143|11.7647058823529|15.3846153846154	0|0|0	Chr3_11257953_11258053_R_AT3G29330.2_1
Chr5:23578092-23579786	AT5G58320	Chr5:23579430-23579523	IR	3	3	-	AT5G58320.2	-13.91	0.000874	0.007	16.6666666666667|11.2676056338028|13.7931034482759	0|0|0	Chr5_23579430_23579523_R_AT5G58320.2_1
Chr5:23578092-23579755	AT5G58320	Chr5:23579430-23579528	IR	3	3	-	ONT.16851.2	-13.91	0.000874	0.007	16.6666666666667|11.2676056338028|13.7931034482759	0|0|0	Chr5_23579430_23579528_R_ONT.16851.2_1
Chr5:20789688-20789837	AT5G51150	Chr5:20789827-20789837	A3SS	3	3	-	AT5G51150.1	-14.12	0.00236	0.0153	95.5555555555556|96.1538461538462|97.6744186046512	79.1666666666667|85.9154929577465|81.9444444444444	Chr5_20789688_20789837_S_AT5G51150.1_1
Chr3:18733068-18734388	AT3G50480	Chr3:18733598-18733888	IR	3	3	-	Ex.AT3G50480.1	-14.2	5.29e-05	0.0001	14.9010477299185|15.0470219435737|12.6447876447876	0|0|0	Chr3_18733598_18733888_R_Ex.AT3G50480.1_1
Chr3:17577350-17579604	AT3G47680	Chr3:17578779-17579312	IR (overlapping region)	3	3	-	ONT.11344.10	-14.22	0.000333	0.000618	15.0943396226415|15.7894736842105|11.7647058823529	0|0|0	Chr3_17578779_17579312_R_ONT.11344.10_1
Chr1:27115492-27115914	AT1G72050	Chr1:27115642-27115816	SES	3	3	-	AT1G72050.1	-14.26	0.00313	0.00369	88.8888888888889|89.1566265060241|88.5714285714286	70.2898550724638|75.7575757575758|77.7777777777778	Chr1_27115492_27115914_W_AT1G72050.1_1
Chr3:17200319-17201889	AT3G46700	Chr3:17201308-17201382	IR	3	3	-	ONT.11305.2	-14.27	0.00189	0.00349	18.1818181818182|12.5|12.1212121212121	0|0|0	Chr3_17201308_17201382_R_ONT.11305.2_1
Chr1:390865-391025	AT1G02100	Chr1:391003-391025	A3SS	3	3	-	AT1G02100.1	-14.27	0.00158	0.00198	87.8048780487805|87.1287128712871|90.5797101449275	75.3846153846154|71.1743772241993|76.1316872427983	Chr1_390865_391025_S_AT1G02100.1_1
Chr5:26615355-26616990	AT5G66675	Chr5:26616687-26616812	IR	3	3	-	AT5G66675.1	-14.3	0.00109	0.0121	15.2173913043478|11.0091743119266|16.6666666666667	0|0|0	Chr5_26616687_26616812_R_AT5G66675.1_1
Chr1:9184663-9187524	AT1G26580	Chr1:9185765-9185876	IR	3	3	-	ONT.1003.3	-14.43	0.000418	0.000566	13.4228187919463|17.0731707317073|12.781954887218	0|0|0	Chr1_9185765_9185876_R_ONT.1003.3_1
Chr5:6470171-6471062	AT5G19240	Chr5:6470291-6470463	IR	3	3	-	ONT.15671.2	-14.44	0.000669	0.0175	11.6666666666667|14.7798742138365|16.865671641791	0|0|0	Chr5_6470291_6470463_R_ONT.15671.2_1
Chr4:14265758-14266535	AT4G28910	Chr4:14266023-14266105	SES	3	3	-	AT4G28910.2	-14.49	0.00649	0.0197	56.7510548523207|53.1746031746032|55.0827423167849	41.0926365795724|44.6700507614213|35.7746478873239	Chr4_14265758_14266535_W_AT4G28910.2_1
Chr3:633313-633869	ONT.10112	Chr3:633357-633460	IR (overlapping region)	3	3	-	ONT.10112.1	-14.53	0.001	0.00247	12.7272727272727|17.910447761194|12.962962962963	0|0|0	Chr3_633357_633460_R_ONT.10112.1_1
Chr2:201489-201683	AT2G01450	Chr2:201605-201683	A5SS	3	3	-	AT2G01450.1	-14.53	0.00073	0.00119	91.6666666666667|90.2542372881356|87.6447876447876	74.2222222222222|77.3504273504274|74.3961352657005	Chr2_201489_201683_S_AT2G01450.1_1
Chr5:6213068-6213279	AT5G18640	Chr5:6213068-6213160	A5SS	3	3	-	Ex.TSS.AT5G18640.1	-14.63	0.0034	0.0824	93.7062937062937|90|89.1304347826087	80|75.1724137931034|73.7704918032787	Chr5_6213068_6213279_S_Ex.TSS.AT5G18640.1_1
Chr1:2585878-2586735	AT1G08230	Chr1:2586520-2586612	IR (overlapping region)	3	3	-	Ex.ONT.2908.2	-14.67	1.15e-05	1.33e-05	14.2857142857143|15.748031496063|13.9705882352941	0|0|0	Chr1_2586520_2586612_R_Ex.ONT.2908.2_1
Chr1:30022260-30022981	AT1G79820	Chr1:30022603-30022834	IR	3	3	-	Ex.AT1G79820.4	-14.69	0.00428	0.00525	18|16.3265306122449|9.75609756097561	0|0|0	Chr1_30022603_30022834_R_Ex.AT1G79820.4_1
Chr3:2938738-2939099	AT3G09560	Chr3:2938738-2938776	TSS|A3SS	3	3	-	TSS.AT3G09560.1	-14.72	0.00221	0.00489	90.4761904761905|89.0909090909091|83.8709677419355	74.1935483870968|72|73.0769230769231	Chr3_2938738_2939099_S_TSS.AT3G09560.1_1
Chr3:2938731-2939099	AT3G09560	Chr3:2938731-2938776	TSS|A3SS	3	3	-	TSS.AT3G09560.1	-14.72	0.00221	0.00489	90.4761904761905|89.0909090909091|83.8709677419355	74.1935483870968|72|73.0769230769231	Chr3_2938731_2939099_S_TSS.AT3G09560.1_1
Chr3:5052731-5054942	AT3G15010	Chr3:5054063-5054605	IR	3	3	-	AT3G15010.2	-14.73	0.00129	0.00306	11.6129032258065|17.9487179487179|14.6153846153846	0|0|0	Chr3_5054063_5054605_R_AT3G15010.2_1
Chr5:2330399-2332281	AT5G07370	Chr5:2330498-2331226	IR	3	3	-	AT5G07370.4	-14.74	0.00173	0.0121	16.3157894736842|17.0854271356784|10.8108108108108	0|0|0	Chr5_2330498_2331226_R_AT5G07370.4_1
Chr5:2330399-2332281	AT5G07370	Chr5:2331044-2331226	IR	3	3	-	AT5G07370.4	-14.85	0.00192	0.0135	16.3157894736842|17.4358974358974|10.8108108108108	0|0|0	Chr5_2331044_2331226_R_AT5G07370.4_1
Chr5:2330399-2332281	AT5G07370	Chr5:2330845-2331226	IR	3	3	-	AT5G07370.4	-14.85	0.00192	0.0135	16.3157894736842|17.4358974358974|10.8108108108108	0|0|0	Chr5_2330845_2331226_R_AT5G07370.4_1
Chr3:19273494-19275269	AT3G51940	Chr3:19274982-19275069	IR	3	3	-	Ex.AT3G51940.1	-14.99	0.00803	0.0154	18.4210526315789|17.6470588235294|8.88888888888889	0|0|0	Chr3_19274982_19275069_R_Ex.AT3G51940.1_1
Chr5:2330399-2332281	AT5G07370	Chr5:2330498-2331232	IR	3	3	-	AT5G07370.4	-15.02	0.00129	0.00905	16.6666666666667|17.0854271356784|11.2994350282486	0|0|0	Chr5_2330498_2331232_R_AT5G07370.4_1
Chr2:18296199-18297867	AT2G44260	Chr2:18297027-18297148	IR (overlapping region)	3	3	-	AT2G44260.1	-15.04	0.00808	0.0127	16.6666666666667|9.09090909090909|19.3548387096774	0|0|0	Chr2_18297027_18297148_R_AT2G44260.1_1
Chr4:13662896-13663220	AT4G27270	Chr4:13662896-13662931	TSS|A3SS	3	3	-	TSS.ONT.14389.1	-15.15	0.00868	0.0258	27.6315789473684|26.3157894736842|32.0610687022901	12.1951219512195|18.6046511627907|9.75609756097561	Chr4_13662896_13663220_S_TSS.ONT.14389.1_1
Chr3:10255957-10256995	AT3G27690	Chr3:10256151-10256269	IR	3	3	-	ONT.9205.2	-15.15	0.00914	0.0161	20|16.3636363636364|9.09090909090909	0|0|0	Chr3_10256151_10256269_R_ONT.9205.2_1
Chr1:7882536-7883742	AT1G22310	Chr1:7883126-7883196	IR	3	3	-	AT1G22310.2	-15.21	0.000159	0.000211	13.3333333333333|15.1515151515152|17.1428571428571	0|0|0	Chr1_7883126_7883196_R_AT1G22310.2_1
Chr3:9513814-9514101	AT3G26020	Chr3:9513855-9514037	IR (overlapping region)	3	3	-	ONT.9138.2	-15.24	0.00947	0.0223	20.6349206349206|9.375|15.7142857142857	0|0|0	Chr3_9513855_9514037_R_ONT.9138.2_1
Chr3:19324169-19324469	AT3G52105	Chr3:19324361-19324458	IR (overlapping region)	3	3	-	ONT.9587.3	-15.34	1.19e-07	2.29e-07	15.3846153846154|15.625|15	0|0|0	Chr3_19324361_19324458_R_ONT.9587.3_1
Chr5:19568909-19569788	AT5G48290	Chr5:19568986-19569058	IR (overlapping region)	3	3	-	ONT.16449.2	-15.38	3.93e-06	2.38e-05	15.7894736842105|15.8371040723982|14.5	0|0|0	Chr5_19568986_19569058_R_ONT.16449.2_1
Chr5:3333459-3335232	AT5G10550	Chr5:3334920-3335013	IR (overlapping region)	3	3	-	Ex.AT5G10550.1	-15.43	1.37e-05	0.000181	14.327485380117|15.5672823218997|16.3987138263666	0|0|0	Chr5_3334920_3335013_R_Ex.AT5G10550.1_1
Chr2:15052454-15052681	AT2G35830	Chr2:15052667-15052681	TSS|A3SS	3	3	-	TSS.AT2G35830.2	-15.43	0.00131	0.00193	59.0163934426229|63.768115942029|59.0909090909091	43.0939226519337|45.6221198156682|46.8571428571429	Chr2_15052454_15052681_S_TSS.AT2G35830.2_1
Chr4:12756567-12757551	AT4G24740	Chr4:12756745-12756934	SES	3	3	-	AT4G24740.1	-15.44	0.00912	0.0263	86.8243243243243|89.7338403041825|92.4686192468619	78.7128712871287|69|75	Chr4_12756567_12757551_W_AT4G24740.1_1
Chr1:8594698-8594809	AT1G24260	Chr1:8594807-8594809	A5SS	3	3	-	AT1G24260.2	-15.55	0.00214	0.00288	65.2777777777778|58.2010582010582|63.0057803468208	45.1754385964912|47.4358974358974|47.2222222222222	Chr1_8594698_8594809_S_AT1G24260.2_1
Chr4:7595002-7595992	AT4G12990	Chr4:7595430-7595823	IR	3	3	-	ONT.13804.7	-15.84	0.00535	0.0216	20.1680672268908|16.9642857142857|10.377358490566	0|0|0	Chr4_7595430_7595823_R_ONT.13804.7_1
Chr3:22398737-22399903	AT3G60590	Chr3:22398767-22398885	IR	3	3	-	Ex.AT3G60590.1	-15.84	0.00332	0.00695	20|16.25|11.2676056338028	0|0|0	Chr3_22398767_22398885_R_Ex.AT3G60590.1_1
Chr3:22398732-22399887	AT3G60590	Chr3:22398782-22398885	IR	3	3	-	Ex.TSS.ONT.9910.3	-15.84	0.00332	0.00695	20|16.25|11.2676056338028	0|0|0	Chr3_22398782_22398885_R_Ex.TSS.ONT.9910.3_1
Chr1:19764519-19765556	ONT.1587	Chr1:19765308-19765390	IR (overlapping region)	3	3	-	ONT.1587.1	-15.9	0.00223	0.0024	14.4736842105263|12.8571428571429|20.3703703703704	0|0|0	Chr1_19765308_19765390_R_ONT.1587.1_1
Chr5:26887670-26888605	AT5G67390	Chr5:26888333-26888431	IR (overlapping region)	3	3	-	Ex.AT5G67390.1	-16.01	0.0019	0.0219	16.6666666666667|11.9047619047619|19.4444444444444	0|0|0	Chr5_26888333_26888431_R_Ex.AT5G67390.1_1
Chr3:328742-329031	AT3G01980	Chr3:328849-328958	IR (overlapping region)	3	3	-	AT3G01980.1	-16.04	2.23e-05	4.96e-05	17.1428571428571|14.7239263803681|16.25	0|0|0	Chr3_328849_328958_R_AT3G01980.1_1
Chr1:4575408-4576632	AT1G13350	Chr1:4575836-4576238	IR	3	3	-	Ex.AT1G13350.1	-16.09	0.00233	0.00294	20.6521739130435|14.6788990825688|12.9411764705882	0|0|0	Chr1_4575836_4576238_R_Ex.AT1G13350.1_1
Chr4:7594986-7595992	AT4G12990	Chr4:7595536-7595823	IR	3	3	-	Ex.ONT.13804.6	-16.12	0.00354	0.0143	20.1680672268908|16.9642857142857|11.214953271028	0|0|0	Chr4_7595536_7595823_R_Ex.ONT.13804.6_1
Chr4:16187056-16187676	AT4G33740	Chr4:16187197-16187361	IR	3	3	-	Ex.ONT.13184.5	-16.26	7.74e-08	2.57e-07	15.9722222222222|16.5714285714286|16.2393162393162	0|0|0	Chr4_16187197_16187361_R_Ex.ONT.13184.5_1
Chr5:901169-902411	AT5G03560	Chr5:901169-902235	TSS|A3SS	3	3	-	TSS.ONT.17331.3	-16.27	0.00712	0.862	29.5454545454545|37.3493975903614|35.8208955223881	20.6896551724138|13.75|19.4805194805195	Chr5_901169_902411_S_TSS.ONT.17331.3_1
Chr5:10293044-10295261	ONT.15976	Chr5:10294254-10294706	IR (overlapping region)	3	3	-	ONT.15976.2	-16.31	4.79e-05	0.000216	17.2413793103448|14.572864321608|17.1270718232044	0|0|0	Chr5_10294254_10294706_R_ONT.15976.2_1
Chr1:20803704-20804573	AT1G55675	Chr1:20803961-20804302	IR	3	3	-	AT1G55675.1	-16.31	1.79e-05	1.95e-05	17.2727272727273|16.6666666666667|15	0|0|0	Chr1_20803961_20804302_R_AT1G55675.1_1
Chr3:7838884-7839467	AT3G22210	Chr3:7839249-7839335	IR	3	3	-	ONT.10921.1	-16.35	0.00117	0.00298	19.2546583850932|17.2222222222222|12.5748502994012	0|0|0	Chr3_7839249_7839335_R_ONT.10921.1_1
Chr1:7453248-7453802	AT1G21310	Chr1:7453574-7453686	IR	3	3	-	Ex.ONT.3433.2	-16.46	0.000163	0.000215	14.2857142857143|18.4210526315789|16.6666666666667	0|0|0	Chr1_7453574_7453686_R_Ex.ONT.3433.2_1
Chr4:7536989-7538279	AT4G12850	Chr4:7537204-7538081	IR	3	3	-	Ex.ONT.12340.2	-16.53	0.000578	0.00234	17.9487179487179|13.2075471698113|18.4210526315789	0|0|0	Chr4_7537204_7538081_R_Ex.ONT.12340.2_1
Chr3:327627-329031	AT3G01980	Chr3:328619-328741	IR (overlapping region)	3	3	-	Ex.AT3G01980.2	-16.54	7.56e-06	1.68e-05	17.6136363636364|15.7575757575758|16.25	0|0|0	Chr3_328619_328741_R_Ex.AT3G01980.2_1
[truncated: 443 more rows]

## Sheet: C v.s D(S)
Event_Region	GeneID	Target_Exon	Event_Type	N	T	Exon_Type	Reference_Transcript	ﾎ捻SI(%)	T-test_p-value	FDR(BH)	N_Values	T_Values	DatabaseID
[truncated: 253 more rows]
