# Supplementary material for: Full-length transcriptome sequencing of Arabidopsis plants provided new insights into the autophagic regulation of photosynthesis
Source: Sci Rep. 2024 Jun 25;14:14588. doi: 10.1038/s41598-024-65555-7 (PMC11199623; doi:10.1038/s41598-024-65555-7)
Supplement: Supplementary file 7 — Supplementary Table S6. [file 41598_2024_65555_MOESM7_ESM.xlsx]

## Sheet: Table S6
Table S6. GO enrichment analyses on the 254 genes with AS events.
GO ID	Description	out (123)	All (20920)	pvalue	p.adjust	Genes
GO:0019008	molybdopterin synthase complex	2	3	0.000102472	0.0195722	AT2G43760;AT4G10100
GO:0009523	photosystem II	4	76	0.0010531	0.100571	AT2G39470;AT3G27690;AT3G55330;AT4G19100
GO:0009521	photosystem	4	95	0.00239888	0.152729	AT2G39470;AT3G27690;AT3G55330;AT4G19100
GO:0098807	chloroplast thylakoid membrane protein complex	2	18	0.00493283	0.235543	AT3G27690;AT3G55330
GO:0009654	photosystem II oxygen evolving complex	2	24	0.00869621	0.330063	AT2G39470;AT3G55330
GO:0009535	chloroplast thylakoid membrane	7	445	0.0162209	0.330063	AT1G07320;AT1G64770;AT2G25625;AT2G39470;AT3G27690;AT3G55330;AT4G19100
GO:0055035	plastid thylakoid membrane	7	446	0.0164015	0.330063	AT1G07320;AT1G64770;AT2G25625;AT2G39470;AT3G27690;AT3G55330;AT4G19100
GO:0009530	primary cell wall	1	3	0.017536	0.330063	AT1G21310
GO:0034357	photosynthetic membrane	7	466	0.0203202	0.330063	AT1G07320;AT1G64770;AT2G25625;AT2G39470;AT3G27690;AT3G55330;AT4G19100
GO:0042651	thylakoid membrane	7	466	0.0203202	0.330063	AT1G07320;AT1G64770;AT2G25625;AT2G39470;AT3G27690;AT3G55330;AT4G19100
GO:0005623	cell	107	16647	0.022311	0.330063	AT1G01710;AT1G02100;AT1G07320;AT1G08230;AT1G10890;AT1G11270;AT1G13700;AT1G14205;AT1G16010;AT1G16560;AT1G19430;AT1G21310;AT1G22310;AT1G24260;AT1G26580;AT1G31170;AT1G31812;AT1G31820;AT1G49600;AT1G53440;AT1G54217;AT1G54370;AT1G61180;AT1G64770;AT1G65540;AT1G67300;AT1G68050;AT1G72050;AT1G72320;AT1G73350;AT1G80380;AT2G01450;AT2G04540;AT2G04690;AT2G20790;AT2G21540;AT2G23980;AT2G25625;AT2G27340;AT2G35620…
GO:0044464	cell part	107	16647	0.022311	0.330063	AT1G01710;AT1G02100;AT1G07320;AT1G08230;AT1G10890;AT1G11270;AT1G13700;AT1G14205;AT1G16010;AT1G16560;AT1G19430;AT1G21310;AT1G22310;AT1G24260;AT1G26580;AT1G31170;AT1G31812;AT1G31820;AT1G49600;AT1G53440;AT1G54217;AT1G54370;AT1G61180;AT1G64770;AT1G65540;AT1G67300;AT1G68050;AT1G72050;AT1G72320;AT1G73350;AT1G80380;AT2G01450;AT2G04540;AT2G04690;AT2G20790;AT2G21540;AT2G23980;AT2G25625;AT2G27340;AT2G35620…
GO:0016020	membrane	68	9598	0.022465	0.330063	AT1G02100;AT1G05320;AT1G07320;AT1G08230;AT1G14205;AT1G16010;AT1G16560;AT1G19430;AT1G31812;AT1G31820;AT1G53440;AT1G54217;AT1G54370;AT1G61180;AT1G64770;AT1G65540;AT1G67300;AT1G68290;AT1G73350;AT1G74440;AT2G04690;AT2G20790;AT2G21540;AT2G23348;AT2G23980;AT2G25510;AT2G25625;AT2G27340;AT2G35620;AT2G39470;AT2G40540;AT2G43080;AT2G44260;AT2G46920;AT3G01980;AT3G08710;AT3G09560;AT3G13437;AT3G17650;AT3G27690…
GO:0044436	thylakoid part	7	488	0.0253405	0.338674	AT1G07320;AT1G64770;AT2G25625;AT2G39470;AT3G27690;AT3G55330;AT4G19100
GO:0000311	plastid large ribosomal subunit	1	6	0.0347669	0.338674	AT1G07320
GO:0009503	thylakoid light-harvesting complex	1	6	0.0347669	0.338674	AT3G27690
GO:0009517	PSII associated light-harvesting complex II	1	6	0.0347669	0.338674	AT3G27690
GO:0030076	light-harvesting complex	1	6	0.0347669	0.338674	AT3G27690
GO:0098796	membrane protein complex	8	643	0.0361806	0.338674	AT1G64770;AT2G20790;AT2G39470;AT3G27690;AT3G52400;AT3G55330;AT4G19100;AT4G38510
GO:0044425	membrane part	54	7474	0.0369767	0.338674	AT1G05320;AT1G08230;AT1G14205;AT1G16010;AT1G16560;AT1G19430;AT1G31820;AT1G53440;AT1G54217;AT1G54370;AT1G61180;AT1G64770;AT1G65540;AT1G67300;AT1G68290;AT1G73350;AT1G74440;AT2G04690;AT2G20790;AT2G23348;AT2G23980;AT2G25510;AT2G35620;AT2G39470;AT2G40540;AT2G43080;AT2G44260;AT3G01980;AT3G13437;AT3G17650;AT3G27690;AT3G29970;AT3G42150;AT3G43220;AT3G52400;AT3G55330;AT4G19100;AT4G19420;AT4G19520;AT4G22120…
GO:0033180	proton-transporting V-type ATPase, V1 domain	1	7	0.0404436	0.338674	AT4G38510
GO:0009534	chloroplast thylakoid	7	540	0.040445	0.338674	AT1G07320;AT1G64770;AT2G25625;AT2G39470;AT3G27690;AT3G55330;AT4G19100
GO:0031976	plastid thylakoid	7	541	0.0407827	0.338674	AT1G07320;AT1G64770;AT2G25625;AT2G39470;AT3G27690;AT3G55330;AT4G19100
GO:0089701	U2AF	1	8	0.0460872	0.366778	AT4G36690
GO:0009547	plastid ribosome	1	9	0.051698	0.379781	AT1G07320
GO:0032586	protein storage vacuole membrane	1	9	0.051698	0.379781	AT3G09560
GO:0031984	organelle subcompartment	10	958	0.055989	0.384339	AT1G07320;AT1G19430;AT1G54370;AT1G64770;AT2G25625;AT2G39470;AT2G43080;AT3G27690;AT3G55330;AT4G19100
GO:0044434	chloroplast part	14	1511	0.060305	0.384339	AT1G07320;AT1G64770;AT1G67300;AT1G80380;AT2G25625;AT2G39470;AT2G41680;AT3G27690;AT3G55330;AT4G19100;AT4G35450;AT4G38510;AT5G36880;AT5G58560
GO:0016021	integral component of membrane	49	6870	0.0608338	0.384339	AT1G05320;AT1G08230;AT1G14205;AT1G16010;AT1G16560;AT1G19430;AT1G31820;AT1G53440;AT1G54217;AT1G54370;AT1G61180;AT1G65540;AT1G67300;AT1G68290;AT1G73350;AT1G74440;AT2G04690;AT2G23348;AT2G23980;AT2G25510;AT2G35620;AT2G40540;AT2G43080;AT2G44260;AT3G01980;AT3G13437;AT3G17650;AT3G27690;AT3G29970;AT3G42150;AT3G43220;AT3G52400;AT4G19100;AT4G19420;AT4G19520;AT4G22120;AT4G23290;AT4G24380;AT4G35450;AT4G36690…
GO:0044435	plastid part	14	1524	0.0638147	0.384339	AT1G07320;AT1G64770;AT1G67300;AT1G80380;AT2G25625;AT2G39470;AT2G41680;AT3G27690;AT3G55330;AT4G19100;AT4G35450;AT4G38510;AT5G36880;AT5G58560
GO:0000243	commitment complex	1	12	0.0683345	0.384339	AT4G36690
GO:0010598	NAD(P)H dehydrogenase complex (plastoquinone)	1	12	0.0683345	0.384339	AT1G64770
GO:0030688	preribosome, small subunit precursor	1	12	0.0683345	0.384339	AT1G72320
GO:0019005	SCF ubiquitin ligase complex	2	75	0.0721035	0.384339	AT1G68050;AT3G07550
GO:0009514	glyoxysome	1	13	0.0738154	0.384339	AT5G36880
GO:0030131	clathrin adaptor complex	1	13	0.0738154	0.384339	AT2G20790
GO:0009579	thylakoid	7	622	0.0744531	0.384339	AT1G07320;AT1G64770;AT2G25625;AT2G39470;AT3G27690;AT3G55330;AT4G19100
GO:0019898	extrinsic component of membrane	2	86	0.0911577	0.423847	AT2G39470;AT3G55330
GO:0031224	intrinsic component of membrane	49	7057	0.0911988	0.423847	AT1G05320;AT1G08230;AT1G14205;AT1G16010;AT1G16560;AT1G19430;AT1G31820;AT1G53440;AT1G54217;AT1G54370;AT1G61180;AT1G65540;AT1G67300;AT1G68290;AT1G73350;AT1G74440;AT2G04690;AT2G23348;AT2G23980;AT2G25510;AT2G35620;AT2G40540;AT2G43080;AT2G44260;AT3G01980;AT3G13437;AT3G17650;AT3G27690;AT3G29970;AT3G42150;AT3G43220;AT3G52400;AT4G19100;AT4G19420;AT4G19520;AT4G22120;AT4G23290;AT4G24380;AT4G35450;AT4G36690…
GO:0031354	intrinsic component of plastid outer membrane	1	17	0.095421	0.423847	AT4G35450
GO:0031355	integral component of plastid outer membrane	1	17	0.095421	0.423847	AT4G35450
GO:0031358	intrinsic component of chloroplast outer membrane	1	17	0.095421	0.423847	AT4G35450
GO:0031359	integral component of chloroplast outer membrane	1	17	0.095421	0.423847	AT4G35450
GO:0030119	AP-type membrane coat adaptor complex	1	19	0.106036	0.45716	AT2G20790
GO:0016607	nuclear speck	2	95	0.107708	0.45716	AT3G61860;AT4G36690
GO:0031350	intrinsic component of plastid membrane	1	22	0.121726	0.472173	AT4G35450
GO:0031351	integral component of plastid membrane	1	22	0.121726	0.472173	AT4G35450
GO:0031985	Golgi cisterna	3	207	0.122863	0.472173	AT1G19430;AT1G54370;AT2G43080
GO:0000159	protein phosphatase type 2A complex	1	23	0.126896	0.472173	AT3G26020
GO:0000178	exosome (RNase complex)	1	23	0.126896	0.472173	AT5G38895
GO:0005622	intracellular	93	14765	0.12855	0.472173	AT1G01710;AT1G02100;AT1G07320;AT1G10890;AT1G11270;AT1G13700;AT1G14205;AT1G16010;AT1G16560;AT1G19430;AT1G22310;AT1G24260;AT1G26580;AT1G31170;AT1G31812;AT1G49600;AT1G54217;AT1G54370;AT1G64770;AT1G65540;AT1G67300;AT1G68050;AT1G72050;AT1G72320;AT1G73350;AT1G80380;AT2G01450;AT2G04540;AT2G04690;AT2G20790;AT2G21540;AT2G25625;AT2G27340;AT2G35830;AT2G39470;AT2G41680;AT2G43080;AT2G43760;AT2G45380;AT2G46920…
GO:0044424	intracellular part	93	14765	0.12855	0.472173	AT1G01710;AT1G02100;AT1G07320;AT1G10890;AT1G11270;AT1G13700;AT1G14205;AT1G16010;AT1G16560;AT1G19430;AT1G22310;AT1G24260;AT1G26580;AT1G31170;AT1G31812;AT1G49600;AT1G54217;AT1G54370;AT1G64770;AT1G65540;AT1G67300;AT1G68050;AT1G72050;AT1G72320;AT1G73350;AT1G80380;AT2G01450;AT2G04540;AT2G04690;AT2G20790;AT2G21540;AT2G25625;AT2G27340;AT2G35830;AT2G39470;AT2G41680;AT2G43080;AT2G43760;AT2G45380;AT2G46920…
GO:0033176	proton-transporting V-type ATPase complex	1	25	0.137144	0.485809	AT4G38510
GO:0005795	Golgi stack	3	218	0.137349	0.485809	AT1G19430;AT1G54370;AT2G43080
GO:0030118	clathrin coat	1	26	0.142223	0.493493	AT2G20790
GO:0030686	90S preribosome	1	27	0.147273	0.493493	AT1G72320
GO:0033178	proton-transporting two-sector ATPase complex, catalytic domain	1	27	0.147273	0.493493	AT4G38510
GO:0071004	U2-type prespliceosome	1	29	0.157284	0.509172	AT4G36690
GO:0071010	prespliceosome	1	29	0.157284	0.509172	AT4G36690
GO:0010494	cytoplasmic stress granule	1	30	0.162245	0.512097	AT1G49600
GO:0009505	plant-type cell wall	3	237	0.163642	0.512097	AT1G21310;AT4G19420;AT5G23870
GO:0005737	cytoplasm	70	10910	0.16623	0.512097	AT1G01710;AT1G02100;AT1G07320;AT1G10890;AT1G13700;AT1G14205;AT1G16010;AT1G16560;AT1G19430;AT1G31170;AT1G31812;AT1G49600;AT1G54217;AT1G54370;AT1G64770;AT1G65540;AT1G67300;AT1G68050;AT1G72050;AT1G80380;AT2G01450;AT2G04540;AT2G04690;AT2G20790;AT2G21540;AT2G25625;AT2G27340;AT2G35830;AT2G39470;AT2G41680;AT2G43080;AT2G43760;AT2G45380;AT2G47020;AT3G01980;AT3G08710;AT3G09560;AT3G13190;AT3G13430;AT3G17800…
GO:0008287	protein serine/threonine phosphatase complex	1	32	0.172082	0.513557	AT3G26020
GO:1903293	phosphatase complex	1	32	0.172082	0.513557	AT3G26020
GO:0016604	nuclear body	2	130	0.177931	0.522845	AT3G61860;AT4G36690
GO:0032580	Golgi cisterna membrane	1	34	0.181804	0.526129	AT1G54370
GO:0044444	cytoplasmic part	61	9479	0.193047	0.543035	AT1G01710;AT1G07320;AT1G10890;AT1G13700;AT1G14205;AT1G16010;AT1G16560;AT1G19430;AT1G31170;AT1G31812;AT1G49600;AT1G54217;AT1G54370;AT1G64770;AT1G65540;AT1G67300;AT1G68050;AT1G72050;AT1G80380;AT2G04540;AT2G04690;AT2G20790;AT2G21540;AT2G25625;AT2G27340;AT2G35830;AT2G39470;AT2G41680;AT2G43080;AT2G43760;AT2G47020;AT3G01980;AT3G08710;AT3G09560;AT3G13190;AT3G17800;AT3G26020;AT3G27690;AT3G43220;AT3G45740…
GO:0000139	Golgi membrane	5	524	0.19599	0.543035	AT1G16560;AT1G19430;AT1G54370;AT2G21540;AT3G09560
GO:0000315	organellar large ribosomal subunit	1	37	0.196175	0.543035	AT1G07320
GO:0000137	Golgi cis cisterna	1	41	0.214948	0.5865	AT2G43080
GO:0005886	plasma membrane	24	3462	0.218696	0.588322	AT1G08230;AT1G31812;AT1G31820;AT1G53440;AT1G54370;AT1G61180;AT2G21540;AT2G23980;AT2G35620;AT2G40540;AT2G46920;AT3G08710;AT3G17650;AT3G52400;AT4G22120;AT4G23290;AT4G27270;AT4G35450;AT4G38510;AT5G03240;AT5G04020;AT5G08760;AT5G12480;AT5G54980
GO:0009522	photosystem I	1	43	0.22417	0.588546	AT3G27690
GO:1990204	oxidoreductase complex	2	152	0.224942	0.588546	AT2G39470;AT3G55330
GO:0009543	chloroplast thylakoid lumen	1	47	0.242294	0.611197	AT3G55330
GO:0031978	plastid thylakoid lumen	1	47	0.242294	0.611197	AT3G55330
GO:0009941	chloroplast envelope	6	717	0.246735	0.611197	AT1G67300;AT1G80380;AT3G27690;AT4G35450;AT4G38510;AT5G58560
GO:0031201	SNARE complex	1	48	0.246759	0.611197	AT3G52400
GO:0031969	chloroplast membrane	3	294	0.249599	0.611197	AT1G67300;AT4G35450;AT5G58560
GO:0042170	plastid membrane	3	302	0.262227	0.629531	AT1G67300;AT4G35450;AT5G58560
GO:0009526	plastid envelope	6	736	0.26549	0.629531	AT1G67300;AT1G80380;AT3G27690;AT4G35450;AT4G38510;AT5G58560
GO:0009507	chloroplast	17	2449	0.269612	0.629531	AT1G07320;AT1G14205;AT1G31170;AT1G64770;AT1G67300;AT1G80380;AT2G25625;AT2G39470;AT2G41680;AT3G17800;AT3G27690;AT3G55330;AT4G19100;AT4G35450;AT4G38510;AT5G36880;AT5G58560
GO:0005634	nucleus	40	6223	0.279415	0.629531	AT1G07320;AT1G10890;AT1G11270;AT1G22310;AT1G24260;AT1G26580;AT1G31812;AT1G49600;AT1G64770;AT1G65540;AT1G68050;AT1G72050;AT1G72320;AT1G73350;AT2G01450;AT2G46920;AT3G08710;AT3G15080;AT3G23250;AT3G26020;AT3G48100;AT3G48120;AT3G61860;AT3G62090;AT4G17410;AT4G19520;AT4G19990;AT4G24380;AT4G28910;AT4G34140;AT4G35450;AT4G36690;AT5G03240;AT5G12480;AT5G20730;AT5G44750;AT5G44920;AT5G55670;AT5G59780;AT5G63320
GO:0043231	intracellular membrane-bounded organelle	78	12646	0.281768	0.629531	AT1G01710;AT1G07320;AT1G10890;AT1G11270;AT1G14205;AT1G16010;AT1G16560;AT1G19430;AT1G22310;AT1G24260;AT1G26580;AT1G31170;AT1G31812;AT1G49600;AT1G54370;AT1G64770;AT1G65540;AT1G67300;AT1G68050;AT1G72050;AT1G72320;AT1G73350;AT1G80380;AT2G01450;AT2G04540;AT2G04690;AT2G20790;AT2G21540;AT2G25625;AT2G27340;AT2G35830;AT2G39470;AT2G41680;AT2G43080;AT2G46920;AT2G47020;AT3G01980;AT3G08710;AT3G09560;AT3G15080…
GO:0044431	Golgi apparatus part	6	753	0.282578	0.629531	AT1G16560;AT1G19430;AT1G54370;AT2G21540;AT2G43080;AT3G09560
GO:0000313	organellar ribosome	1	57	0.285788	0.629531	AT1G07320
GO:0043227	membrane-bounded organelle	78	12658	0.286183	0.629531	AT1G01710;AT1G07320;AT1G10890;AT1G11270;AT1G14205;AT1G16010;AT1G16560;AT1G19430;AT1G22310;AT1G24260;AT1G26580;AT1G31170;AT1G31812;AT1G49600;AT1G54370;AT1G64770;AT1G65540;AT1G67300;AT1G68050;AT1G72050;AT1G72320;AT1G73350;AT1G80380;AT2G01450;AT2G04540;AT2G04690;AT2G20790;AT2G21540;AT2G25625;AT2G27340;AT2G35830;AT2G39470;AT2G41680;AT2G43080;AT2G46920;AT2G47020;AT3G01980;AT3G08710;AT3G09560;AT3G15080…
GO:0031965	nuclear membrane	1	58	0.289998	0.629531	AT5G44920
GO:0009536	plastid	20	2977	0.294953	0.629531	AT1G07320;AT1G14205;AT1G31170;AT1G64770;AT1G67300;AT1G80380;AT2G25625;AT2G39470;AT2G41680;AT3G08710;AT3G17800;AT3G27690;AT3G55330;AT4G19100;AT4G35450;AT4G38510;AT5G12480;AT5G36880;AT5G58560;AT5G64816
GO:0005764	lysosome	1	60	0.298346	0.629531	AT2G20790
GO:0071944	cell periphery	27	4152	0.31182	0.629531	AT1G08230;AT1G21310;AT1G31812;AT1G31820;AT1G53440;AT1G54370;AT1G61180;AT2G21540;AT2G23980;AT2G35620;AT2G40540;AT2G46920;AT3G08710;AT3G17650;AT3G52400;AT4G19420;AT4G22120;AT4G23290;AT4G27270;AT4G35450;AT4G38510;AT5G03240;AT5G04020;AT5G08760;AT5G12480;AT5G23870;AT5G54980
GO:0000323	lytic vacuole	1	66	0.32281	0.629531	AT2G20790
GO:0009707	chloroplast outer membrane	1	66	0.32281	0.629531	AT4G35450
GO:0031967	organelle envelope	9	1264	0.325915	0.629531	AT1G65540;AT1G67300;AT1G80380;AT3G27690;AT4G35450;AT4G38510;AT5G44920;AT5G58560;AT5G61310
GO:0031975	envelope	9	1264	0.325915	0.629531	AT1G65540;AT1G67300;AT1G80380;AT3G27690;AT4G35450;AT4G38510;AT5G44920;AT5G58560;AT5G61310
GO:0009527	plastid outer membrane	1	68	0.330774	0.629531	AT4G35450
GO:0005684	U2-type spliceosomal complex	1	69	0.334722	0.629531	AT4G36690
GO:0016469	proton-transporting two-sector ATPase complex	1	69	0.334722	0.629531	AT4G38510
GO:0031300	intrinsic component of organelle membrane	2	205	0.339862	0.629531	AT1G16560;AT4G35450
GO:0005829	cytosol	22	3389	0.341121	0.629531	AT1G01710;AT1G07320;AT1G13700;AT1G31812;AT1G49600;AT1G68050;AT1G72050;AT2G20790;AT2G41680;AT2G43760;AT3G08710;AT3G09560;AT3G13190;AT3G26020;AT3G27690;AT3G52340;AT3G52400;AT3G55330;AT4G10100;AT4G27270;AT5G03690;AT5G36880
GO:0031461	cullin-RING ubiquitin ligase complex	2	206	0.342002	0.629531	AT1G68050;AT3G07550
GO:0030117	membrane coat	1	71	0.342548	0.629531	AT2G20790
GO:0048475	coated membrane	1	71	0.342548	0.629531	AT2G20790
GO:0030529	intracellular ribonucleoprotein complex	7	970	0.344803	0.629531	AT1G07320;AT1G14205;AT1G49600;AT1G54217;AT1G72320;AT3G61860;AT4G36690
GO:0031977	thylakoid lumen	1	72	0.346427	0.629531	AT3G55330
GO:0005777	peroxisome	3	358	0.351994	0.629531	AT1G01710;AT3G01980;AT5G36880
GO:0042579	microbody	3	358	0.351994	0.629531	AT1G01710;AT3G01980;AT5G36880
GO:0005681	spliceosomal complex	2	211	0.352669	0.629531	AT3G61860;AT4G36690
GO:0010287	plastoglobule	1	78	0.369227	0.652984	AT3G27690
GO:0005730	nucleolus	4	537	0.3885	0.674602	AT1G72050;AT1G72320;AT3G26020;AT4G36690
GO:1990904	ribonucleoprotein complex	7	1018	0.391224	0.674602	AT1G07320;AT1G14205;AT1G49600;AT1G54217;AT1G72320;AT3G61860;AT4G36690
GO:0000138	Golgi trans cisterna	1	85	0.394831	0.674602	AT1G19430
GO:0031227	intrinsic component of endoplasmic reticulum membrane	1	86	0.398404	0.674602	AT1G16560
GO:0043229	intracellular organelle	79	13119	0.402073	0.674602	AT1G01710;AT1G07320;AT1G10890;AT1G11270;AT1G14205;AT1G16010;AT1G16560;AT1G19430;AT1G22310;AT1G24260;AT1G26580;AT1G31170;AT1G31812;AT1G49600;AT1G54217;AT1G54370;AT1G64770;AT1G65540;AT1G67300;AT1G68050;AT1G72050;AT1G72320;AT1G73350;AT1G80380;AT2G01450;AT2G04540;AT2G04690;AT2G20790;AT2G21540;AT2G25625;AT2G27340;AT2G35830;AT2G39470;AT2G41680;AT2G43080;AT2G46920;AT2G47020;AT3G01980;AT3G08710;AT3G09560…
GO:0031090	organelle membrane	16	2506	0.402642	0.674602	AT1G16560;AT1G19430;AT1G54370;AT1G65540;AT1G67300;AT2G20790;AT2G21540;AT2G43080;AT3G09560;AT3G43220;AT4G35450;AT4G38510;AT5G44920;AT5G58320;AT5G58560;AT5G61310
GO:0030684	preribosome	1	90	0.412486	0.685086	AT1G72320
GO:0035770	ribonucleoprotein granule	1	93	0.422833	0.690266	AT1G49600
GO:0036464	cytoplasmic ribonucleoprotein granule	1	93	0.422833	0.690266	AT1G49600
GO:0098791	Golgi subcompartment	3	408	0.431311	0.694521	AT1G19430;AT1G54370;AT2G43080
GO:0043226	organelle	79	13191	0.43301	0.694521	AT1G01710;AT1G07320;AT1G10890;AT1G11270;AT1G14205;AT1G16010;AT1G16560;AT1G19430;AT1G22310;AT1G24260;AT1G26580;AT1G31170;AT1G31812;AT1G49600;AT1G54217;AT1G54370;AT1G64770;AT1G65540;AT1G67300;AT1G68050;AT1G72050;AT1G72320;AT1G73350;AT1G80380;AT2G01450;AT2G04540;AT2G04690;AT2G20790;AT2G21540;AT2G25625;AT2G27340;AT2G35830;AT2G39470;AT2G41680;AT2G43080;AT2G46920;AT2G47020;AT3G01980;AT3G08710;AT3G09560…
GO:0005770	late endosome	1	97	0.436348	0.694521	AT2G20790
GO:0005746	mitochondrial respiratory chain	1	101	0.44955	0.702205	AT5G61310
GO:0032991	macromolecular complex	21	3420	0.451148	0.702205	AT1G07320;AT1G14205;AT1G49600;AT1G54217;AT1G64770;AT1G68050;AT1G72320;AT2G20790;AT2G39470;AT2G43760;AT3G07550;AT3G26020;AT3G27690;AT3G52400;AT3G55330;AT3G61860;AT4G10100;AT4G19100;AT4G36690;AT4G38510;AT5G38895
GO:0005773	vacuole	8	1247	0.452205	0.702205	AT1G16010;AT2G04690;AT2G20790;AT3G09560;AT3G43220;AT4G38510;AT5G03240;AT5G58320
GO:0043234	protein complex	15	2426	0.459187	0.707295	AT1G64770;AT1G68050;AT2G20790;AT2G39470;AT2G43760;AT3G07550;AT3G26020;AT3G27690;AT3G52400;AT3G55330;AT4G10100;AT4G19100;AT4G36690;AT4G38510;AT5G38895
GO:0005739	mitochondrion	12	1932	0.465664	0.711535	AT1G10890;AT1G31170;AT1G65540;AT1G80380;AT2G04540;AT2G20790;AT2G47020;AT3G45740;AT4G23290;AT5G04130;AT5G27460;AT5G61310
GO:0005794	Golgi apparatus	8	1276	0.478199	0.724889	AT1G16560;AT1G19430;AT1G54370;AT2G21540;AT2G43080;AT3G09560;AT4G38510;AT5G08760
GO:0000151	ubiquitin ligase complex	2	277	0.486191	0.731201	AT1G68050;AT3G07550
GO:0030659	cytoplasmic vesicle membrane	1	114	0.490372	0.731726	AT2G20790
GO:0009570	chloroplast stroma	5	787	0.494435	0.73207	AT1G07320;AT1G80380;AT2G41680;AT3G27690;AT5G36880
GO:0009532	plastid stroma	5	794	0.502281	0.732386	AT1G07320;AT1G80380;AT2G41680;AT3G27690;AT5G36880
GO:0012506	vesicle membrane	1	118	0.502317	0.732386	AT2G20790
GO:0044433	cytoplasmic vesicle part	1	120	0.508185	0.735329	AT2G20790
GO:0019867	outer membrane	1	127	0.528189	0.750509	AT4G35450
GO:0031968	organelle outer membrane	1	127	0.528189	0.750509	AT4G35450
GO:0070469	respiratory chain	1	128	0.53098	0.750509	AT5G61310
GO:0005768	endosome	3	477	0.534394	0.750509	AT1G19430;AT1G54370;AT2G20790
GO:0005774	vacuolar membrane	4	661	0.547397	0.760954	AT3G09560;AT3G43220;AT4G38510;AT5G58320
GO:0044437	vacuolar part	4	663	0.549799	0.760954	AT3G09560;AT3G43220;AT4G38510;AT5G58320
GO:0009705	plant-type vacuole membrane	1	137	0.555373	0.761278	AT3G09560
GO:0005635	nuclear envelope	1	138	0.558005	0.761278	AT5G44920
GO:0005743	mitochondrial inner membrane	2	320	0.563643	0.763517	AT1G65540;AT5G61310
GO:0005840	ribosome	3	528	0.603537	0.8118	AT1G07320;AT1G14205;AT1G54217
GO:0098805	whole membrane	6	1083	0.61747	0.824732	AT1G54370;AT3G09560;AT3G43220;AT4G35450;AT4G38510;AT5G58320
GO:0005654	nucleoplasm	3	551	0.632452	0.83836	AT1G10890;AT3G61860;AT4G36690
GO:0099503	secretory vesicle	1	173	0.640985	0.83836	AT2G04690
GO:0016023	cytoplasmic, membrane-bounded vesicle	2	369	0.641372	0.83836	AT2G04690;AT2G20790
GO:0005759	mitochondrial matrix	1	175	0.64523	0.83836	AT3G45740
GO:0031988	membrane-bounded vesicle	2	382	0.660094	0.847502	AT2G04690;AT2G20790
GO:1902494	catalytic complex	5	951	0.662891	0.847502	AT1G68050;AT2G39470;AT3G07550;AT3G26020;AT3G55330
GO:0000325	plant-type vacuole	1	187	0.669671	0.847502	AT3G09560
GO:0010008	endosome membrane	1	190	0.675515	0.847502	AT1G54370
GO:0015934	large ribosomal subunit	1	195	0.685029	0.847502	AT1G07320
GO:0098588	bounding membrane of organelle	10	1894	0.685503	0.847502	AT1G16560;AT1G19430;AT1G54370;AT2G21540;AT2G43080;AT3G09560;AT3G43220;AT4G35450;AT4G38510;AT5G58320
GO:0044440	endosomal part	1	198	0.690604	0.847502	AT1G54370
GO:0044429	mitochondrial part	3	603	0.692378	0.847502	AT1G65540;AT3G45740;AT5G61310
GO:0031301	integral component of organelle membrane	1	201	0.696081	0.847502	AT4G35450
GO:0031410	cytoplasmic vesicle	2	415	0.70413	0.847502	AT2G04690;AT2G20790
GO:0031981	nuclear lumen	6	1197	0.712441	0.847502	AT1G10890;AT1G72050;AT1G72320;AT3G26020;AT3G61860;AT4G36690
GO:0019866	organelle inner membrane	2	422	0.712844	0.847502	AT1G65540;AT5G61310
GO:0031966	mitochondrial membrane	2	428	0.720142	0.847502	AT1G65540;AT5G61310
GO:0044446	intracellular organelle part	33	6041	0.723445	0.847502	AT1G07320;AT1G10890;AT1G16560;AT1G19430;AT1G54370;AT1G64770;AT1G65540;AT1G67300;AT1G72050;AT1G72320;AT1G80380;AT2G20790;AT2G21540;AT2G25625;AT2G39470;AT2G41680;AT2G43080;AT3G09560;AT3G26020;AT3G27690;AT3G43220;AT3G45740;AT3G55330;AT3G61860;AT4G19100;AT4G35450;AT4G36690;AT4G38510;AT5G36880;AT5G44920;AT5G58320;AT5G58560;AT5G61310
GO:0044451	nucleoplasm part	2	432	0.724922	0.847502	AT3G61860;AT4G36690
GO:0044422	organelle part	33	6059	0.730417	0.847502	AT1G07320;AT1G10890;AT1G16560;AT1G19430;AT1G54370;AT1G64770;AT1G65540;AT1G67300;AT1G72050;AT1G72320;AT1G80380;AT2G20790;AT2G21540;AT2G25625;AT2G39470;AT2G41680;AT2G43080;AT3G09560;AT3G26020;AT3G27690;AT3G43220;AT3G45740;AT3G55330;AT3G61860;AT4G19100;AT4G35450;AT4G36690;AT4G38510;AT5G36880;AT5G44920;AT5G58320;AT5G58560;AT5G61310
GO:0043233	organelle lumen	7	1414	0.733289	0.847502	AT1G10890;AT1G72050;AT1G72320;AT3G26020;AT3G45740;AT3G61860;AT4G36690
GO:0070013	intracellular organelle lumen	7	1414	0.733289	0.847502	AT1G10890;AT1G72050;AT1G72320;AT3G26020;AT3G45740;AT3G61860;AT4G36690
GO:0005740	mitochondrial envelope	2	442	0.736572	0.847502	AT1G65540;AT5G61310
GO:0005783	endoplasmic reticulum	6	1245	0.747321	0.851266	AT1G16560;AT2G27340;AT2G35830;AT2G43080;AT5G08760;AT5G44920
GO:0031974	membrane-enclosed lumen	7	1443	0.752411	0.851266	AT1G10890;AT1G72050;AT1G72320;AT3G26020;AT3G45740;AT3G61860;AT4G36690
GO:0012505	endomembrane system	13	2561	0.754276	0.851266	AT1G16560;AT1G19430;AT1G54370;AT2G20790;AT2G21540;AT2G27340;AT2G35830;AT2G43080;AT3G09560;AT3G52400;AT4G38510;AT5G08760;AT5G44920
GO:0044455	mitochondrial membrane part	1	239	0.757671	0.851266	AT5G61310
GO:0031982	vesicle	2	518	0.812124	0.90711	AT2G04690;AT2G20790
GO:0043228	non-membrane-bounded organelle	9	1967	0.828282	0.914462	AT1G07320;AT1G14205;AT1G49600;AT1G54217;AT1G72050;AT1G72320;AT3G26020;AT4G36690;AT5G04130
GO:0043232	intracellular non-membrane-bounded organelle	9	1967	0.828282	0.914462	AT1G07320;AT1G14205;AT1G49600;AT1G54217;AT1G72050;AT1G72320;AT3G26020;AT4G36690;AT5G04130
GO:0005802	trans-Golgi network	1	306	0.837613	0.919449	AT1G19430
GO:0005618	cell wall	3	793	0.849921	0.91959	AT1G21310;AT4G19420;AT5G23870
GO:0030312	external encapsulating structure	3	793	0.849921	0.91959	AT1G21310;AT4G19420;AT5G23870
GO:0022626	cytosolic ribosome	1	326	0.855939	0.91959	AT1G07320
GO:0044428	nuclear part	7	1653	0.862487	0.91959	AT1G10890;AT1G72050;AT1G72320;AT3G26020;AT3G61860;AT4G36690;AT5G44920
GO:0005789	endoplasmic reticulum membrane	2	591	0.865986	0.91959	AT1G16560;AT2G43080
GO:0042175	nuclear outer membrane-endoplasmic reticulum membrane network	2	595	0.868487	0.91959	AT1G16560;AT2G43080
GO:0044391	ribosomal subunit	1	345	0.871444	0.91959	AT1G07320
GO:0044445	cytosolic part	1	365	0.885979	0.929791	AT1G07320
GO:0044432	endoplasmic reticulum part	2	649	0.898329	0.937601	AT1G16560;AT2G43080
GO:1990234	transferase complex	2	667	0.906799	0.941297	AT1G68050;AT3G07550
GO:0005911	cell-cell junction	3	967	0.927703	0.943463	AT3G52400;AT4G27270;AT5G19090
GO:0009506	plasmodesma	3	967	0.927703	0.943463	AT3G52400;AT4G27270;AT5G19090
GO:0055044	symplast	3	968	0.928018	0.943463	AT3G52400;AT4G27270;AT5G19090
GO:0030054	cell junction	3	970	0.928644	0.943463	AT3G52400;AT4G27270;AT5G19090
GO:0005694	chromosome	1	468	0.938647	0.94858	AT5G04130
GO:0005576	extracellular region	6	1923	0.974494	0.979623	AT1G05320;AT1G07320;AT1G21310;AT2G04690;AT4G19420;AT5G23870
GO:0005575	cellular_component	123	20920	1	1	AT1G01710;AT1G02100;AT1G05320;AT1G07320;AT1G08230;AT1G10890;AT1G11270;AT1G13700;AT1G14205;AT1G16010;AT1G16560;AT1G19430;AT1G21310;AT1G22310;AT1G24260;AT1G26580;AT1G31170;AT1G31812;AT1G31820;AT1G49600;AT1G53440;AT1G54217;AT1G54370;AT1G61180;AT1G64770;AT1G65540;AT1G67300;AT1G68050;AT1G68290;AT1G72050;AT1G72320;AT1G73350;AT1G74440;AT1G80380;AT2G01450;AT2G04540;AT2G04690;AT2G20790;AT2G21540;AT2G23348…
