# Supplementary material for: Full-length transcriptome sequencing of Arabidopsis plants provided new insights into the autophagic regulation of photosynthesis
Source: Sci Rep. 2024 Jun 25;14:14588. doi: 10.1038/s41598-024-65555-7 (PMC11199623; doi:10.1038/s41598-024-65555-7)
Supplement: Supplementary file 8 — Supplementary Table S7. [file 41598_2024_65555_MOESM8_ESM.xlsx]

## Sheet: ALL
Table S7 LncRNAs identification.
#lncRNA_ID	Gene_ID
ONT.14695.2	AT4G34430;AT4G34440;AT4G34450;AT4G34460;AT4G34470;AT4G34480;AT4G34490;AT4G34500;AT4G34510;AT4G34520;AT4G34530;AT4G34540;AT4G34550;AT4G34555;AT4G34560;AT4G34570;AT4G34580;AT4G34588;AT4G34600;AT4G34610;AT4G34620;AT4G34630;AT4G34640;AT4G34650;AT4G34660;AT4G34670;AT4G34680;AT4G34690;AT4G34700;AT4G34720;AT4G34730;AT4G34740;AT4G34750;AT4G34760;AT4G34770;AT4G34780;AT4G34790;AT4G34800;AT4G34810;AT4G34830…
ONT.2591.1	AT1G80500;AT1G80510;AT1G80520;AT1G80530;AT1G80540;AT1G80550;AT1G80555;AT1G80560;AT1G80570;AT1G80580;AT1G80590;AT1G80600;AT1G80610;AT1G80620;AT1G80630;AT1G80640;AT1G80650;AT1G80660;AT1G80670;AT1G80680;AT1G80690;AT1G80700;AT1G80710;AT1G80720;AT1G80730;AT1G80740;AT1G80745;AT1G80750;AT1G80760;AT1G80770;AT1G80780;AT1G80790;AT1G80810;AT1G80820;AT1G80830;AT1G80831;AT1G80840;AT1G80850;AT1G80860;AT1G80865…
ONT.17768.3	AT5G14590;AT5G14600;AT5G14602;AT5G14610;AT5G14620;AT5G14640;AT5G14650;AT5G14660;AT5G14670;AT5G14680;AT5G14690;AT5G14700;AT5G14710;AT5G14720;AT5G14730;AT5G14740;AT5G14750;AT5G14760;AT5G14770;AT5G14780;AT5G14790;AT5G14800;AT5G14820;AT5G14850;AT5G14860;AT5G14870;AT5G14880;AT5G14890;AT5G14900;AT5G14910;AT5G14920;AT5G14930;AT5G14940;AT5G14950;AT5G14960;AT5G14970;AT5G14980;AT5G14990;AT5G14995;AT5G15000…
ONT.3643.2	AT1G27950;AT1G27960;AT1G27970;AT1G27980;AT1G27990;AT1G28000;AT1G28007;AT1G28010;AT1G28020;AT1G28030;AT1G28040;AT1G28050;AT1G28060;AT1G28070;AT1G28080;AT1G28090;AT1G28100;AT1G28110;AT1G28120;AT1G28130;AT1G28135;AT1G28140;AT1G28160;AT1G28170;AT1G28180;AT1G28190;AT1G28200;AT1G28210;AT1G28220;AT1G28230;AT1G28240;AT1G28250;AT1G28260;AT1G28270;AT1G28280;AT1G28281;AT1G28290;AT1G28300;AT1G28304;AT1G28305…
ONT.11881.1	AT3G60970;AT3G60980;AT3G60990;AT3G61010;AT3G61028;AT3G61030;AT3G61035;AT3G61040;AT3G61050;AT3G61060;AT3G61070;AT3G61080;AT3G61090;AT3G61100;AT3G61110;AT3G61111;AT3G61113;AT3G61117;AT3G61120;AT3G61130;AT3G61140;AT3G61150;AT3G61160;AT3G61170;AT3G61172;AT3G61175;AT3G61177;AT3G61180;AT3G61182;AT3G61190;AT3G61200;AT3G61210;AT3G61220;AT3G61230;AT3G61240;AT3G61250;AT3G61260;AT3G61270;AT3G61280;AT3G61290…
ONT.12360.5	AT4G13310;AT4G13320;AT4G13330;AT4G13340;AT4G13345;AT4G13350;AT4G13360;AT4G13370;AT4G13380;AT4G13390;AT4G13395;AT4G13400;AT4G13410;AT4G13420;AT4G13430;AT4G13440;AT4G13450;AT4G13460;AT4G13480;AT4G13490;AT4G13500;AT4G13510;AT4G13520;AT4G13530;AT4G13540;AT4G13550;AT4G13560;AT4G13570;AT4G13572;AT4G13575;AT4G13580;AT4G13590;AT4G13600;AT4G13610;AT4G13615;AT4G13620;AT4G13630;AT4G13640;AT4G13650;ONT.12359…
ONT.2698.3	AT1G03230;AT1G03240;AT1G03250;AT1G03260;AT1G03270;AT1G03280;AT1G03290;AT1G03300;AT1G03310;AT1G03320;AT1G03330;AT1G03340;AT1G03350;AT1G03360;AT1G03365;AT1G03370;AT1G03380;AT1G03390;AT1G03400;AT1G03410;AT1G03430;AT1G03440;AT1G03445;AT1G03457;AT1G03470;AT1G03475;AT1G03490;AT1G03495;AT1G03510;AT1G03520;AT1G03530;AT1G03540;AT1G03560;AT1G03590;AT1G03600;AT1G03610;AT1G03620;AT1G03630;AT1G03650;AT1G03660…
ONT.4258.3	AT1G56410;AT1G56415;AT1G56418;AT1G56420;AT1G56423;AT1G56430;AT1G56440;AT1G56450;AT1G56460;AT1G56500;AT1G56510;AT1G56520;AT1G56530;AT1G56540;AT1G56550;AT1G56553;AT1G56555;AT1G56560;AT1G56570;AT1G56580;AT1G56590;AT1G56600;AT1G56610;AT1G56620;AT1G56630;AT1G56650;AT1G56660;AT1G56670;AT1G56680;AT1G56690;AT1G56700;AT1G56710;AT1G56720;AT1G57540;AT1G57550;ONT.1727
ONT.4878.2	AT1G74970;AT1G74990;AT1G75000;AT1G75010;AT1G75020;AT1G75030;AT1G75040;AT1G75050;AT1G75060;AT1G75080;AT1G75090;AT1G75100;AT1G75110;AT1G75120;AT1G75130;AT1G75140;AT1G75150;AT1G75160;AT1G75170;AT1G75180;AT1G75190;AT1G75200;AT1G75210;AT1G75220;AT1G75230;AT1G75240;AT1G75250;AT1G75260;AT1G75270;AT1G75280;AT1G75290;AT1G75300;AT1G75310;AT1G75330;AT1G75335;AT1G75340;AT1G75350;AT1G75360;AT1G75370;AT1G75380…
ONT.18324.1	AT5G36739;AT5G36740;AT5G36770;AT5G36780;AT5G36790;AT5G36800;AT5G36805;AT5G36810;AT5G36820;AT5G36870;AT5G36880;AT5G36890;AT5G36900;AT5G36910;AT5G36920;AT5G36925;AT5G36930;AT5G36940;AT5G36950;AT5G36960;AT5G36970;AT5G36980;AT5G37000;AT5G37010;AT5G37020;AT5G37030;AT5G37040;AT5G37050;AT5G37055;AT5G37060
ONT.12147.2	AT4G04030;AT4G04040;AT4G04078;AT4G04080;AT4G04090;AT4G04110;AT4G04180;AT4G04190;AT4G04200;AT4G04210;AT4G04220;AT4G04260;AT4G04320;AT4G04330;AT4G04340;AT4G04350;AT4G04360;AT4G04370;ONT.13602
ONT.2770.23	AT1G04890;AT1G04900;AT1G04910;AT1G04920;AT1G04930;AT1G04940;AT1G04945;AT1G04950;AT1G04960;AT1G04970;AT1G04980;AT1G04985;AT1G04990;AT1G05000;AT1G05010;AT1G05020;AT1G05030;AT1G05040;AT1G05055;AT1G05060;AT1G05065;AT1G05070;AT1G05080;AT1G05085;AT1G05090;AT1G05100;AT1G05120;AT1G05136;AT1G05140;AT1G05150;AT1G05160;AT1G05170;AT1G05180;AT1G05190;AT1G05200;AT1G05205;AT1G05210;AT1G05220;AT1G05230;AT1G05240…
ONT.5616.1	AT2G22490;AT2G22500;AT2G22510;AT2G22520;AT2G22530;AT2G22540;AT2G22560;AT2G22570;AT2G22590;AT2G22600;AT2G22610;AT2G22620;AT2G22630;AT2G22640;AT2G22650;AT2G22660;AT2G22670;AT2G22680;AT2G22690;AT2G22720;AT2G22730;AT2G22740;AT2G22750;AT2G22760;AT2G22770;AT2G22780;AT2G22790;AT2G22795;AT2G22800;AT2G22802;AT2G22805;AT2G22807;AT2G22810;AT2G22820;AT2G22830;AT2G22840;AT2G22850;AT2G22860;AT2G22870;AT2G22880…
ONT.16529.3	AT5G50120;AT5G50130;AT5G50136;AT5G50140;AT5G50150;AT5G50160;AT5G50170;AT5G50175;AT5G50180;AT5G50200;AT5G50210;AT5G50220;AT5G50230;AT5G50240;AT5G50250;AT5G50260;AT5G50270;AT5G50280;AT5G50290;AT5G50300;AT5G50310;AT5G50320;AT5G50330;AT5G50335;AT5G50340;AT5G50345;AT5G50350;AT5G50360;AT5G50361;AT5G50370;AT5G50375;AT5G50380;AT5G50390;AT5G50400;AT5G50410;AT5G50420;AT5G50423;AT5G50430;AT5G50440;AT5G50450…
ONT.1155.2	AT1G30515;AT1G30520;AT1G30530;AT1G30540;AT1G30550;AT1G30560;AT1G30570;AT1G30580;AT1G30590;AT1G30600;AT1G30610;AT1G30620;AT1G30630;AT1G30640;AT1G30650;AT1G30660;AT1G30670;AT1G30680;AT1G30690;AT1G30700;AT1G30710;AT1G30720;AT1G30730;AT1G30740;AT1G30750;AT1G30755;AT1G30760;AT1G30780;AT1G30790;AT1G30795;AT1G30800;AT1G30810;AT1G30814;AT1G30820;AT1G30825;AT1G30840;AT1G30845;AT1G30850;AT1G30860;AT1G30870…
ONT.11291.3	AT3G46190;AT3G46200;AT3G46206;AT3G46210;AT3G46220;AT3G46230;AT3G46240;AT3G46260;AT3G46270;AT3G46280;AT3G46290;AT3G46300;AT3G46310;AT3G46320;AT3G46330;AT3G46340;AT3G46350;AT3G46360;AT3G46370;AT3G46380;AT3G46390;AT3G46400;AT3G46410;AT3G46420;AT3G46430;AT3G46440;AT3G46450;AT3G46460;AT3G46470;AT3G46480;AT3G46490;AT3G46500;AT3G46510;AT3G46520;AT3G46530;AT3G46540;AT3G46550;AT3G46560;AT3G46570;AT3G46580…
ONT.13826.1	AT4G13370;AT4G13380;AT4G13390;AT4G13395;AT4G13400;AT4G13410;AT4G13420;AT4G13430;AT4G13440;AT4G13450;AT4G13460;AT4G13480;AT4G13490;AT4G13500;AT4G13510;AT4G13520;AT4G13530;AT4G13540;AT4G13550;AT4G13560;AT4G13570;AT4G13572;AT4G13575;AT4G13580;AT4G13590;AT4G13600;AT4G13610;AT4G13615;AT4G13620;AT4G13630;AT4G13640;AT4G13650;AT4G13660;AT4G13670;AT4G13680;AT4G13690;AT4G13700;AT4G13710;AT4G13720;AT4G13730…
ONT.6921.2	AT2G18160;AT2G18170;AT2G18180;AT2G18190;AT2G18193;AT2G18196;AT2G18200;AT2G18210;AT2G18220;AT2G18230;AT2G18240;AT2G18245;AT2G18250;AT2G18260;AT2G18270;AT2G18280;AT2G18290;AT2G18300;AT2G18320;AT2G18328;AT2G18330;AT2G18340;AT2G18350;AT2G18360;AT2G18370;AT2G18380;AT2G18390;AT2G18400;AT2G18410;AT2G18420;AT2G18450;AT2G18460;AT2G18465;AT2G18470;AT2G18480;AT2G18490;AT2G18500;AT2G18510;AT2G18520;AT2G18530…
ONT.10312.1	AT3G06970;AT3G06980;AT3G06985;AT3G06990;AT3G07000;AT3G07005;AT3G07010;AT3G07020;AT3G07030;AT3G07040;AT3G07050;AT3G07060;AT3G07070;AT3G07080;AT3G07090;AT3G07100;AT3G07110;AT3G07120;AT3G07130;AT3G07140;AT3G07150;AT3G07160;AT3G07170;AT3G07180;AT3G07190;AT3G07195;AT3G07200;AT3G07210;AT3G07220;AT3G07230;AT3G07250;AT3G07260;AT3G07270;AT3G07273;AT3G07290;AT3G07300;AT3G07310;AT3G07320;AT3G07330;AT3G07340…
ONT.9343.1	AT3G45275;AT3G45280;AT3G45285;AT3G45290;AT3G45300;AT3G45310;AT3G45320;AT3G45330;AT3G45390;AT3G45400;AT3G45410;AT3G45420;AT3G45430;AT3G45440;AT3G45443;AT3G45450;AT3G45460;AT3G45470;AT3G45480;AT3G45490;AT3G45500;AT3G45510;AT3G45525;AT3G45530;AT3G45540;AT3G45555;AT3G45560;AT3G45570;AT3G45577;AT3G45580;AT3G45590;AT3G45600;AT3G45610;AT3G45620;AT3G45630;AT3G45640;AT3G45650;AT3G45660;AT3G45670;AT3G45673…
ONT.18152.2	AT5G24510;AT5G24520;AT5G24530;AT5G24540;AT5G24550;AT5G24560;AT5G24570;AT5G24580;AT5G24590;AT5G24593;AT5G24600;AT5G24610;AT5G24620;AT5G24630;AT5G24640;AT5G24650;AT5G24655;AT5G24660;AT5G24670;AT5G24680;AT5G24690;AT5G24710;AT5G24740;AT5G24750;AT5G24760;AT5G24770;AT5G24780;AT5G24790;AT5G24800;AT5G24810;AT5G24820;AT5G24830;AT5G24840;AT5G24850;AT5G24860;AT5G24870;AT5G24879;AT5G24880;AT5G24890;AT5G24900
ONT.4471.1	AT1G64310;AT1G64320;AT1G64330;AT1G64340;AT1G64350;AT1G64355;AT1G64360;AT1G64370;AT1G64380;AT1G64385;AT1G64390;AT1G64400;AT1G64405;AT1G64430;AT1G64440;AT1G64450;AT1G64460;AT1G64470;AT1G64480;AT1G64490;AT1G64500;AT1G64510;AT1G64520;AT1G64530;AT1G64540;AT1G64550;AT1G64561;AT1G64570;AT1G64580;AT1G64583;AT1G64585;AT1G64590;AT1G64600;AT1G64610;AT1G64620;AT1G64625;AT1G64628;AT1G64640;AT1G64650;AT1G64660…
ONT.121.2	AT1G03650;AT1G03660;AT1G03670;AT1G03680;AT1G03687;AT1G03700;AT1G03710;AT1G03720;AT1G03730;AT1G03740;AT1G03750;AT1G03760;AT1G03770;AT1G03780;AT1G03790;AT1G03800;AT1G03810;AT1G03820;AT1G03830;AT1G03840;AT1G03850;AT1G03860;AT1G03870;AT1G03880;AT1G03890;AT1G03900;AT1G03905;AT1G03910;AT1G03920;AT1G03930;AT1G03940;AT1G03950;AT1G03960;AT1G03970;AT1G03980;AT1G03982;AT1G03990;AT1G04000;AT1G04010;AT1G04020…
ONT.8771.1	AT2G28671;AT3G16800;AT3G16810;AT3G16820;AT3G16830;AT3G16840;AT3G16850;AT3G16851;AT3G16857;AT3G16860;AT3G16870;AT3G16880;AT3G16890;AT3G16895;AT3G16900;AT3G16910;AT3G16920;AT3G16930;AT3G16940;AT3G16950;AT3G16960;AT3G16970;AT3G16980;AT3G16990;AT3G17000;AT3G17010;AT3G17020;AT3G17030;AT3G17040;AT3G17060;AT3G17070;AT3G17080;AT3G17090;AT3G17100;AT3G17120;AT3G17130;AT3G17140;AT3G17150;AT3G17152;AT3G17155…
ONT.18093.4	AT5G23150;AT5G23160;AT5G23170;AT5G23180;AT5G23190;AT5G23200;AT5G23210;AT5G23212;AT5G23220;AT5G23230;AT5G23240;AT5G23250;AT5G23260;AT5G23270;AT5G23280;AT5G23290;AT5G23300;AT5G23310;AT5G23320;AT5G23330;AT5G23340;AT5G23350;AT5G23360;AT5G23370;AT5G23380;AT5G23390;AT5G23395;AT5G23400;AT5G23405;AT5G23411;AT5G23420;AT5G23430;AT5G23440;AT5G23450;AT5G23460;AT5G23470;AT5G23480;AT5G23490;AT5G23510;AT5G23520…
ONT.11881.3	AT3G60970;AT3G60980;AT3G60990;AT3G61010;AT3G61028;AT3G61030;AT3G61035;AT3G61040;AT3G61050;AT3G61060;AT3G61070;AT3G61080;AT3G61090;AT3G61100;AT3G61110;AT3G61111;AT3G61113;AT3G61117;AT3G61120;AT3G61130;AT3G61140;AT3G61150;AT3G61160;AT3G61170;AT3G61172;AT3G61175;AT3G61177;AT3G61180;AT3G61182;AT3G61190;AT3G61200;AT3G61210;AT3G61220;AT3G61230;AT3G61240;AT3G61250;AT3G61260;AT3G61270;AT3G61280;AT3G61290…
ONT.5755.1	AT2G26260;AT2G26267;AT2G26270;AT2G26280;AT2G26290;AT2G26300;AT2G26310;AT2G26320;AT2G26330;AT2G26340;AT2G26350;AT2G26360;AT2G26370;AT2G26380;AT2G26390;AT2G26400;AT2G26410;AT2G26420;AT2G26430;AT2G26440;AT2G26450;AT2G26460;AT2G26470;AT2G26480;AT2G26490;AT2G26500;AT2G26510;AT2G26511;AT2G26520;AT2G26530;AT2G26540;AT2G26550;AT2G26560;AT2G26570;AT2G26580;AT2G26590;AT2G26600;AT2G26610;AT2G26620;AT2G26640…
ONT.14871.2	AT4G38390;AT4G38400;AT4G38401;AT4G38405;AT4G38410;AT4G38420;AT4G38430;AT4G38440;AT4G38460;AT4G38470;AT4G38480;AT4G38490;AT4G38495;AT4G38500;AT4G38510;AT4G38520;AT4G38530;AT4G38540;AT4G38550;AT4G38560;AT4G38570;AT4G38580;AT4G38590;AT4G38600;AT4G38620;AT4G38630;AT4G38640;AT4G38650;AT4G38660;AT4G38670;AT4G38690;AT4G38700;AT4G38710;AT4G38730;AT4G38740;AT4G38760;AT4G38770;AT4G38780;AT4G38781;AT4G38790…
ONT.6104.50	AT2G35890;AT2G35900;AT2G35910;AT2G35920;AT2G35930;AT2G35940;AT2G35950;AT2G35960;AT2G35970;AT2G35980;AT2G35990;AT2G36000;AT2G36010;AT2G36020;AT2G36026;AT2G36030;AT2G36050;AT2G36053;AT2G36060;AT2G36070;AT2G36080;AT2G36090;AT2G36100;AT2G36110;AT2G36130;AT2G36145;AT2G36160;AT2G36170;AT2G36180;AT2G36190;AT2G36200;AT2G36210;AT2G36220;AT2G36230;AT2G36240;AT2G36250;AT2G36255;AT2G36260;AT2G36261;AT2G36270…
ONT.7457.31	AT2G32430;AT2G32440;AT2G32450;AT2G32460;AT2G32470;AT2G32480;AT2G32487;AT2G32500;AT2G32510;AT2G32520;AT2G32530;AT2G32540;AT2G32550;AT2G32560;AT2G32580;AT2G32590;AT2G32600;AT2G32610;AT2G32620;AT2G32630;AT2G32640;AT2G32645;AT2G32650;AT2G32660;AT2G32670;AT2G32680;AT2G32700;AT2G32710;AT2G32720;AT2G32730;AT2G32740;AT2G32750;AT2G32760;AT2G32765;AT2G32770;AT2G32780;AT2G32785;AT2G32788;AT2G32790;AT2G32800…
ONT.9295.9	AT3G42723;AT3G42725;AT3G42770;AT3G42780;AT3G42786;AT3G42790;AT3G42800;AT3G42830;AT3G42850;AT3G42860;AT3G42870;AT3G42880;AT3G42940;AT3G42950
ONT.6104.21	AT2G35890;AT2G35900;AT2G35910;AT2G35920;AT2G35930;AT2G35940;AT2G35950;AT2G35960;AT2G35970;AT2G35980;AT2G35990;AT2G36000;AT2G36010;AT2G36020;AT2G36026;AT2G36030;AT2G36050;AT2G36053;AT2G36060;AT2G36070;AT2G36080;AT2G36090;AT2G36100;AT2G36110;AT2G36130;AT2G36145;AT2G36160;AT2G36170;AT2G36180;AT2G36190;AT2G36200;AT2G36210;AT2G36220;AT2G36230;AT2G36240;AT2G36250;AT2G36255;AT2G36260;AT2G36261;AT2G36270…
ONT.9295.1	AT3G42723;AT3G42725;AT3G42770;AT3G42780;AT3G42786;AT3G42790;AT3G42800;AT3G42830;AT3G42850;AT3G42860;AT3G42870;AT3G42880;AT3G42940;AT3G42950
ONT.18093.1	AT5G23150;AT5G23160;AT5G23170;AT5G23180;AT5G23190;AT5G23200;AT5G23210;AT5G23212;AT5G23220;AT5G23230;AT5G23240;AT5G23250;AT5G23260;AT5G23270;AT5G23280;AT5G23290;AT5G23300;AT5G23310;AT5G23320;AT5G23330;AT5G23340;AT5G23350;AT5G23360;AT5G23370;AT5G23380;AT5G23390;AT5G23395;AT5G23400;AT5G23405;AT5G23411;AT5G23420;AT5G23430;AT5G23440;AT5G23450;AT5G23460;AT5G23470;AT5G23480;AT5G23490;AT5G23510;AT5G23520…
ONT.6104.46	AT2G35890;AT2G35900;AT2G35910;AT2G35920;AT2G35930;AT2G35940;AT2G35950;AT2G35960;AT2G35970;AT2G35980;AT2G35990;AT2G36000;AT2G36010;AT2G36020;AT2G36026;AT2G36030;AT2G36050;AT2G36053;AT2G36060;AT2G36070;AT2G36080;AT2G36090;AT2G36100;AT2G36110;AT2G36130;AT2G36145;AT2G36160;AT2G36170;AT2G36180;AT2G36190;AT2G36200;AT2G36210;AT2G36220;AT2G36230;AT2G36240;AT2G36250;AT2G36255;AT2G36260;AT2G36261;AT2G36270…
ONT.13804.3	AT4G12740;AT4G12750;AT4G12760;AT4G12770;AT4G12780;AT4G12790;AT4G12800;AT4G12810;AT4G12820;AT4G12825;AT4G12830;AT4G12840;AT4G12850;AT4G12860;AT4G12870;AT4G12880;AT4G12890;AT4G12900;AT4G12910;AT4G12920;AT4G12930;AT4G12940;AT4G12950;AT4G12960;AT4G12970;AT4G12980;AT4G13000;AT4G13010;AT4G13020;AT4G13030;AT4G13040;AT4G13050;AT4G13060;AT4G13070;AT4G13075;AT4G13080;AT4G13090;AT4G13095;AT4G13100;AT4G13110…
ONT.4442.2	AT1G63450;AT1G63460;AT1G63470;AT1G63480;AT1G63490;AT1G63500;AT1G63520;AT1G63522;AT1G63530;AT1G63535;AT1G63540;AT1G63550;AT1G63560;AT1G63570;AT1G63580;AT1G63590;AT1G63600;AT1G63610;AT1G63630;AT1G63640;AT1G63650;AT1G63660;AT1G63670;AT1G63680;AT1G63690;AT1G63710;AT1G63720;AT1G63730;AT1G63740;AT1G63750;AT1G63770;AT1G63780;AT1G63800;AT1G63810;AT1G63820;AT1G63830;AT1G63840;AT1G63850;AT1G63855;AT1G63860…
ONT.7823.2	AT2G40960;AT2G40970;AT2G40980;AT2G40990;AT2G40995;AT2G41000;AT2G41010;AT2G41020;AT2G41040;AT2G41050;AT2G41060;AT2G41070;AT2G41080;AT2G41082;AT2G41090;AT2G41100;AT2G41110;AT2G41120;AT2G41130;AT2G41140;AT2G41150;AT2G41160;AT2G41170;AT2G41180;AT2G41190;AT2G41200;AT2G41210;AT2G41220;AT2G41225;AT2G41231;AT2G41233;AT2G41240;AT2G41250;AT2G41260;AT2G41280;AT2G41290;AT2G41300;AT2G41310;AT2G41330;AT2G41340…
ONT.9379.2	AT3G46450;AT3G46460;AT3G46470;AT3G46480;AT3G46490;AT3G46500;AT3G46510;AT3G46520;AT3G46530;AT3G46540;AT3G46550;AT3G46560;AT3G46570;AT3G46580;AT3G46590;AT3G46600;AT3G46610;AT3G46613;AT3G46616;AT3G46620;AT3G46630;AT3G46640;AT3G46650;AT3G46660;AT3G46666;AT3G46670;AT3G46680;AT3G46690;AT3G46700;AT3G46710;AT3G46720;AT3G46730;AT3G46740;AT3G46750;AT3G46760;AT3G46770;AT3G46780;AT3G46790;AT3G46800;AT3G46810…
ONT.15135.1	AT5G05110;AT5G05113;AT5G05120;AT5G05130;AT5G05140;AT5G05150;AT5G05160;AT5G05170;AT5G05180;AT5G05190;AT5G05200;AT5G05210;AT5G05220;AT5G05230;AT5G05240;AT5G05250;AT5G05260;AT5G05270;AT5G05280;AT5G05290;AT5G05300;AT5G05310;AT5G05320;AT5G05330;AT5G05340;AT5G05350;AT5G05360;AT5G05365;AT5G05370;AT5G05380;AT5G05390;AT5G05400;AT5G05410;AT5G05420;AT5G05430;AT5G05440;AT5G05450;AT5G05460;AT5G05470;AT5G05480…
ONT.9295.2	AT3G42723;AT3G42725;AT3G42770;AT3G42780;AT3G42786;AT3G42790;AT3G42800;AT3G42830;AT3G42850;AT3G42860;AT3G42870;AT3G42880;AT3G42940;AT3G42950
ONT.12360.3	AT4G13310;AT4G13320;AT4G13330;AT4G13340;AT4G13345;AT4G13350;AT4G13360;AT4G13370;AT4G13380;AT4G13390;AT4G13395;AT4G13400;AT4G13410;AT4G13420;AT4G13430;AT4G13440;AT4G13450;AT4G13460;AT4G13480;AT4G13490;AT4G13500;AT4G13510;AT4G13520;AT4G13530;AT4G13540;AT4G13550;AT4G13560;AT4G13570;AT4G13572;AT4G13575;AT4G13580;AT4G13590;AT4G13600;AT4G13610;AT4G13615;AT4G13620;AT4G13630;AT4G13640;AT4G13650;ONT.12359…
ONT.3886.1	AT1G36510;AT1G36580;AT1G36622;AT1G36640;AT1G36675;AT1G36730;AT1G36745;AT1G36756
ONT.8771.2	AT3G16800;AT3G16810;AT3G16820;AT3G16830;AT3G16840;AT3G16850;AT3G16851;AT3G16857;AT3G16860;AT3G16870;AT3G16880;AT3G16890;AT3G16895;AT3G16900;AT3G16910;AT3G16920;AT3G16930;AT3G16940;AT3G16950;AT3G16960;AT3G16970;AT3G16980;AT3G16990;AT3G17000;AT3G17010;AT3G17020;AT3G17030;AT3G17040;AT3G17060;AT3G17070;AT3G17080;AT3G17090;AT3G17100;AT3G17120;AT3G17130;AT3G17140;AT3G17150;AT3G17152;AT3G17155;AT3G17160…
ONT.9606.2	AT3G52270;AT3G52280;AT3G52290;AT3G52300;AT3G52302;AT3G52310;AT3G52320;AT3G52330;AT3G52340;AT3G52350;AT3G52360;AT3G52370;AT3G52380;AT3G52390;AT3G52400;AT3G52420;AT3G52430;AT3G52440;AT3G52450;AT3G52460;AT3G52470;AT3G52480;AT3G52490;AT3G52500;AT3G52510;AT3G52520;AT3G52525;AT3G52540;AT3G52550;AT3G52560;AT3G52561;AT3G52570;AT3G52580;AT3G52590;AT3G52600;AT3G52610;AT3G52620;AT3G52630;AT3G52640;AT3G52660…
ONT.2770.20	AT1G04890;AT1G04900;AT1G04910;AT1G04920;AT1G04930;AT1G04940;AT1G04945;AT1G04950;AT1G04960;AT1G04970;AT1G04980;AT1G04985;AT1G04990;AT1G05000;AT1G05010;AT1G05020;AT1G05030;AT1G05040;AT1G05055;AT1G05060;AT1G05065;AT1G05070;AT1G05080;AT1G05085;AT1G05090;AT1G05100;AT1G05120;AT1G05136;AT1G05140;AT1G05150;AT1G05160;AT1G05170;AT1G05180;AT1G05190;AT1G05200;AT1G05205;AT1G05210;AT1G05220;AT1G05230;AT1G05240…
ONT.8963.1	AT3G21175;AT3G21180;AT3G21190;AT3G21200;AT3G21210;AT3G21215;AT3G21220;AT3G21230;AT3G21240;AT3G21250;AT3G21260;AT3G21270;AT3G21280;AT3G21290;AT3G21295;AT3G21300;AT3G21310;AT3G21320;AT3G21330;AT3G21338;AT3G21340;AT3G21350;AT3G21351;AT3G21352;AT3G21360;AT3G21370;AT3G21371;AT3G21380;AT3G21390;AT3G21400;AT3G21410;AT3G21420;AT3G21430;AT3G21450;AT3G21460;AT3G21465;AT3G21470;AT3G21480;AT3G21490;AT3G21500…
ONT.1562.1	AT1G52130;AT1G52140;AT1G52150;AT1G52155;AT1G52160;AT1G52180;AT1G52190;AT1G52191;AT1G52200;AT1G52220;AT1G52230;AT1G52240;AT1G52260;AT1G52270;AT1G52280;AT1G52290;AT1G52300;AT1G52310;AT1G52315;AT1G52320;AT1G52325;AT1G52330;AT1G52340;AT1G52342;AT1G52343;AT1G52360;AT1G52370;AT1G52380;AT1G52390;AT1G52400;AT1G52410;AT1G52415;AT1G52420;AT1G52430;AT1G52440;AT1G52450;AT1G52460;AT1G52470;AT1G52490;AT1G52500…
ONT.8706.1	AT3G15350;AT3G15351;AT3G15352;AT3G15353;AT3G15354;AT3G15355;AT3G15356;AT3G15357;AT3G15358;AT3G15359;AT3G15360;AT3G15370;AT3G15380;AT3G15390;AT3G15395;AT3G15400;AT3G15410;AT3G15420;AT3G15430;AT3G15440;AT3G15450;AT3G15460;AT3G15470;AT3G15480;AT3G15490;AT3G15500;AT3G15510;AT3G15518;AT3G15520;AT3G15530;AT3G15534;AT3G15540;AT3G15548;AT3G15550;AT3G15570;AT3G15578;AT3G15580;AT3G15590;AT3G15604;AT3G15605…
ONT.14776.1	AT4G36370;AT4G36380;AT4G36390;AT4G36400;AT4G36410;AT4G36420;AT4G36430;AT4G36440;AT4G36450;AT4G36460;AT4G36470;AT4G36480;AT4G36490;AT4G36500;AT4G36510;AT4G36515;AT4G36520;AT4G36530;AT4G36540;AT4G36550;AT4G36560;AT4G36570;AT4G36580;AT4G36590;AT4G36600;AT4G36610;AT4G36620;AT4G36630;AT4G36640;AT4G36650;AT4G36660;AT4G36670;AT4G36680;AT4G36690;AT4G36700;AT4G36710;AT4G36720;AT4G36730;AT4G36740;AT4G36750…
ONT.1312.2	AT1G35467;AT1G35470;AT1G35490;AT1G35500;AT1G35510;AT1G35515;AT1G35516;AT1G35520;AT1G35530;AT1G35537;AT1G35540;AT1G35550;AT1G35560;AT1G35580;AT1G35610;AT1G35614;AT1G35617;AT1G35620;AT1G35625;AT1G35630;AT1G35660;AT1G35670;AT1G35680;AT1G35710;AT1G35720;AT1G35730;ONT.1311
ONT.6104.34	AT2G35890;AT2G35900;AT2G35910;AT2G35920;AT2G35930;AT2G35940;AT2G35950;AT2G35960;AT2G35970;AT2G35980;AT2G35990;AT2G36000;AT2G36010;AT2G36020;AT2G36026;AT2G36030;AT2G36050;AT2G36053;AT2G36060;AT2G36070;AT2G36080;AT2G36090;AT2G36100;AT2G36110;AT2G36130;AT2G36145;AT2G36160;AT2G36170;AT2G36180;AT2G36190;AT2G36200;AT2G36210;AT2G36220;AT2G36230;AT2G36240;AT2G36250;AT2G36255;AT2G36260;AT2G36261;AT2G36270…
ONT.1197.3	AT1G24851;AT1G25025;AT1G25112;AT1G25180;AT1G31720;AT1G31730;AT1G31740;AT1G31750;AT1G31760;AT1G31770;AT1G31772;AT1G31780;AT1G31790;AT1G31800;AT1G31810;AT1G31812;AT1G31814;AT1G31817;AT1G31820;AT1G31830;AT1G31835;AT1G31840;AT1G31850;AT1G31860;AT1G31870;AT1G31875;AT1G31880;AT1G31920;AT1G31930;AT1G31940;AT1G31950;AT1G31960;AT1G31970;AT1G31990;AT1G32000;AT1G32010;AT1G32020;AT1G32030;AT1G32050;AT1G32060…
ONT.4444.1	AT1G63500;AT1G63520;AT1G63522;AT1G63530;AT1G63535;AT1G63540;AT1G63550;AT1G63560;AT1G63570;AT1G63580;AT1G63590;AT1G63600;AT1G63610;AT1G63630;AT1G63640;AT1G63650;AT1G63660;AT1G63670;AT1G63680;AT1G63690;AT1G63700;AT1G63710;AT1G63720;AT1G63730;AT1G63740;AT1G63750;AT1G63770;AT1G63780;AT1G63800;AT1G63810;AT1G63820;AT1G63830;AT1G63840;AT1G63850;AT1G63855;AT1G63860;AT1G63870;AT1G63880;AT1G63900;AT1G63910…
ONT.4031.6	AT1G49910;AT1G49920;AT1G49930;AT1G49938;AT1G49940;AT1G49950;AT1G49960;AT1G49970;AT1G49975;AT1G49980;AT1G49990;AT1G50000;AT1G50010;AT1G50020;AT1G50030;AT1G50040;AT1G50050;AT1G50060;AT1G50080;AT1G50090;AT1G50110;AT1G50120;AT1G50160;AT1G50170;AT1G50180;AT1G50190;AT1G50200;AT1G50220;AT1G50240;AT1G50250;AT1G50260;AT1G50270;AT1G50280;AT1G50290;AT1G50300;AT1G50310;AT1G50320;AT1G50325;AT1G50340;AT1G50350…
ONT.2108.1	AT1G69010;AT1G69020;AT1G69030;AT1G69040;AT1G69050;AT1G69060;AT1G69070;AT1G69080;AT1G69090;AT1G69100;AT1G69120;AT1G69150;AT1G69160;AT1G69170;AT1G69180;AT1G69190;AT1G69200;AT1G69210;AT1G69220;AT1G69230;AT1G69240;AT1G69250;AT1G69260;AT1G69270;AT1G69280;AT1G69290;AT1G69295;AT1G69310;AT1G69320;AT1G69325;AT1G69330;AT1G69340;AT1G69350;AT1G69360;AT1G69370;AT1G69380;AT1G69390;AT1G69400;AT1G69410;AT1G69420…
ONT.18152.3	AT5G24510;AT5G24520;AT5G24530;AT5G24540;AT5G24550;AT5G24560;AT5G24570;AT5G24580;AT5G24590;AT5G24593;AT5G24600;AT5G24610;AT5G24620;AT5G24630;AT5G24640;AT5G24650;AT5G24655;AT5G24660;AT5G24670;AT5G24680;AT5G24690;AT5G24710;AT5G24740;AT5G24750;AT5G24760;AT5G24770;AT5G24780;AT5G24790;AT5G24800;AT5G24810;AT5G24820;AT5G24830;AT5G24840;AT5G24850;AT5G24860;AT5G24870;AT5G24879;AT5G24880;AT5G24890;AT5G24900
ONT.18721.3	AT5G48160;AT5G48170;AT5G48175;AT5G48180;AT5G48190;AT5G48200;AT5G48205;AT5G48210;AT5G48220;AT5G48230;AT5G48240;AT5G48250;AT5G48270;AT5G48280;AT5G48290;AT5G48300;AT5G48310;AT5G48320;AT5G48330;AT5G48335;AT5G48340;AT5G48350;AT5G48360;AT5G48370;AT5G48375;AT5G48380;AT5G48385;AT5G48390;AT5G48400;AT5G48410;AT5G48420;AT5G48430;AT5G48440;AT5G48450;AT5G48460;AT5G48470;AT5G48480;AT5G48485;AT5G48490;AT5G48500…
ONT.16241.2	AT5G23411;AT5G42591;AT5G42600;AT5G42610;AT5G42620;AT5G42630;AT5G42635;AT5G42640;AT5G42650;AT5G42655;AT5G42660;AT5G42670;AT5G42680;AT5G42690;AT5G42700;AT5G42710;AT5G42720;AT5G42740;AT5G42750;AT5G42760;AT5G42765;AT5G42770;AT5G42780;AT5G42785;AT5G42790;AT5G42797;AT5G42800;AT5G42810;AT5G42820;AT5G42825;AT5G42830;AT5G42840;AT5G42850;AT5G42860;AT5G42870;AT5G42880;AT5G42890;AT5G42895;AT5G42900;AT5G42905…
ONT.8771.6	AT3G16800;AT3G16810;AT3G16820;AT3G16830;AT3G16840;AT3G16850;AT3G16851;AT3G16857;AT3G16860;AT3G16870;AT3G16880;AT3G16890;AT3G16895;AT3G16900;AT3G16910;AT3G16920;AT3G16930;AT3G16940;AT3G16950;AT3G16960;AT3G16970;AT3G16980;AT3G16990;AT3G17000;AT3G17010;AT3G17020;AT3G17030;AT3G17040;AT3G17060;AT3G17070;AT3G17080;AT3G17090;AT3G17100;AT3G17120;AT3G17130;AT3G17140;AT3G17150;AT3G17152;AT3G17155;AT3G17160…
ONT.4844.2	AT1G74160;AT1G74170;AT1G74180;AT1G74190;AT1G74200;AT1G74210;AT1G74220;AT1G74230;AT1G74240;AT1G74250;AT1G74260;AT1G74270;AT1G74280;AT1G74290;AT1G74300;AT1G74310;AT1G74320;AT1G74330;AT1G74340;AT1G74350;AT1G74360;AT1G74370;AT1G74380;AT1G74390;AT1G74400;AT1G74410;AT1G74420;AT1G74430;AT1G74440;AT1G74448;AT1G74450;AT1G74458;AT1G74460;AT1G74470;AT1G74480;AT1G74490;AT1G74500;AT1G74510;AT1G74520;AT1G74530…
ONT.7983.1	AT2G44810;AT2G44820;AT2G44830;AT2G44840;AT2G44850;AT2G44860;AT2G44870;AT2G44880;AT2G44890;AT2G44900;AT2G44910;AT2G44920;AT2G44925;AT2G44930;AT2G44940;AT2G44950;AT2G44970;AT2G44980;AT2G44990;AT2G45000;AT2G45010;AT2G45030;AT2G45040;AT2G45050;AT2G45060;AT2G45070;AT2G45080;AT2G45100;AT2G45110;AT2G45120;AT2G45126;AT2G45130;AT2G45135;AT2G45140;AT2G45150;AT2G45160;AT2G45161;AT2G45170;AT2G45180;AT2G45190…
ONT.15068.1	AT5G03670;AT5G03680;AT5G03690;AT5G03700;AT5G03710;AT5G03720;AT5G03730;AT5G03740;AT5G03750;AT5G03760;AT5G03770;AT5G03780;AT5G03790;AT5G03795;AT5G03800;AT5G03810;AT5G03820;AT5G03830;AT5G03837;AT5G03840;AT5G03850;AT5G03860;AT5G03870;AT5G03880;AT5G03890;AT5G03900;AT5G03905;AT5G03910;AT5G03920;AT5G03930;AT5G03940;AT5G03944;AT5G03960;AT5G03970;AT5G03980;AT5G03990;AT5G03995;AT5G04000;AT5G04010;AT5G04020…
ONT.5345.1	AT2G14935;AT2G14960;AT2G15000;AT2G15010;AT2G15020;AT2G15025;AT2G15029;AT2G15042;AT2G15050;AT2G15080;AT2G15090;AT2G15110;AT2G15130;AT2G15170;AT2G15180;AT2G15185;AT2G15220;AT2G15230;AT2G15240
ONT.2770.3	AT1G04890;AT1G04900;AT1G04910;AT1G04920;AT1G04930;AT1G04940;AT1G04945;AT1G04950;AT1G04960;AT1G04970;AT1G04980;AT1G04985;AT1G04990;AT1G05000;AT1G05010;AT1G05020;AT1G05030;AT1G05040;AT1G05055;AT1G05060;AT1G05065;AT1G05070;AT1G05080;AT1G05085;AT1G05090;AT1G05100;AT1G05120;AT1G05136;AT1G05140;AT1G05150;AT1G05160;AT1G05170;AT1G05180;AT1G05190;AT1G05200;AT1G05205;AT1G05210;AT1G05220;AT1G05230;AT1G05240…
ONT.13801.1	AT4G12650;AT4G12670;AT4G12680;AT4G12690;AT4G12700;AT4G12710;AT4G12720;AT4G12730;AT4G12731;AT4G12735;AT4G12740;AT4G12750;AT4G12760;AT4G12770;AT4G12780;AT4G12790;AT4G12800;AT4G12810;AT4G12820;AT4G12825;AT4G12830;AT4G12840;AT4G12850;AT4G12860;AT4G12870;AT4G12880;AT4G12890;AT4G12900;AT4G12910;AT4G12920;AT4G12930;AT4G12940;AT4G12950;AT4G12960;AT4G12970;AT4G12980;AT4G12990;AT4G13000;AT4G13010;AT4G13020…
ONT.4548.3	AT1G66510;AT1G66520;AT1G66530;AT1G66540;AT1G66550;AT1G66553;AT1G66560;AT1G66570;AT1G66580;AT1G66590;AT1G66600;AT1G66610;AT1G66620;AT1G66630;AT1G66640;AT1G66650;AT1G66660;AT1G66670;AT1G66680;AT1G66690;AT1G66700;AT1G66720;AT1G66730;AT1G66740;AT1G66750;AT1G66760;AT1G66770;AT1G66780;AT1G66790;AT1G66800;AT1G66810;AT1G66820;AT1G66830;AT1G66840;AT1G66850;AT1G66852;AT1G66855;AT1G66860;AT1G66870;AT1G66880…
ONT.16241.1	AT5G23411;AT5G42591;AT5G42600;AT5G42610;AT5G42620;AT5G42630;AT5G42635;AT5G42640;AT5G42650;AT5G42655;AT5G42660;AT5G42670;AT5G42680;AT5G42690;AT5G42700;AT5G42710;AT5G42720;AT5G42740;AT5G42750;AT5G42760;AT5G42765;AT5G42770;AT5G42780;AT5G42785;AT5G42790;AT5G42797;AT5G42800;AT5G42810;AT5G42820;AT5G42825;AT5G42830;AT5G42840;AT5G42850;AT5G42860;AT5G42870;AT5G42880;AT5G42890;AT5G42895;AT5G42900;AT5G42905…
ONT.7165.1	AT2G25100;AT2G25110;AT2G25120;AT2G25130;AT2G25140;AT2G25150;AT2G25160;AT2G25169;AT2G25170;AT2G25180;AT2G25185;AT2G25190;AT2G25200;AT2G25210;AT2G25220;AT2G25230;AT2G25240;AT2G25250;AT2G25260;AT2G25270;AT2G25280;AT2G25290;AT2G25295;AT2G25300;AT2G25305;AT2G25310;AT2G25312;AT2G25320;AT2G25330;AT2G25340;AT2G25344;AT2G25350;AT2G25355;AT2G25360;AT2G25370;AT2G25409;AT2G25410;AT2G25420;AT2G25430;AT2G25440…
ONT.272.2	AT1G07620;AT1G07630;AT1G07640;AT1G07645;AT1G07650;AT1G07660;AT1G07670;AT1G07680;AT1G07690;AT1G07700;AT1G07705;AT1G07710;AT1G07720;AT1G07725;AT1G07730;AT1G07740;AT1G07745;AT1G07747;AT1G07750;AT1G07770;AT1G07780;AT1G07790;AT1G07795;AT1G07810;AT1G07820;AT1G07830;AT1G07840;AT1G07850;AT1G07860;AT1G07870;AT1G07880;AT1G07885;AT1G07890;AT1G07900;AT1G07901;AT1G07910;AT1G07930;AT1G07940;AT1G07950;AT1G07960…
ONT.13828.1	AT4G13430;AT4G13440;AT4G13450;AT4G13460;AT4G13480;AT4G13490;AT4G13500;AT4G13510;AT4G13520;AT4G13530;AT4G13540;AT4G13550;AT4G13560;AT4G13570;AT4G13572;AT4G13575;AT4G13580;AT4G13590;AT4G13600;AT4G13610;AT4G13615;AT4G13620;AT4G13630;AT4G13640;AT4G13650;AT4G13660;AT4G13670;AT4G13680;AT4G13690;AT4G13700;AT4G13710;AT4G13720;AT4G13730;AT4G13750;AT4G13760;AT4G13770;ONT.12359;ONT.12361;ONT.13833
ONT.2161.1	AT1G70310;AT1G70320;AT1G70330;AT1G70340;AT1G70350;AT1G70360;AT1G70370;AT1G70380;AT1G70390;AT1G70400;AT1G70410;AT1G70420;AT1G70430;AT1G70440;AT1G70450;AT1G70460;AT1G70470;AT1G70480;AT1G70490;AT1G70500;AT1G70505;AT1G70510;AT1G70530;AT1G70540;AT1G70550;AT1G70560;AT1G70570;AT1G70580;AT1G70590;AT1G70600;AT1G70610;AT1G70620;AT1G70630;AT1G70640;AT1G70650;AT1G70660;AT1G70670;AT1G70680;AT1G70690;AT1G70700…
ONT.6104.36	AT2G35890;AT2G35900;AT2G35910;AT2G35920;AT2G35930;AT2G35940;AT2G35950;AT2G35960;AT2G35970;AT2G35980;AT2G35990;AT2G36000;AT2G36010;AT2G36020;AT2G36026;AT2G36030;AT2G36050;AT2G36053;AT2G36060;AT2G36070;AT2G36080;AT2G36090;AT2G36100;AT2G36110;AT2G36130;AT2G36145;AT2G36160;AT2G36170;AT2G36180;AT2G36190;AT2G36200;AT2G36210;AT2G36220;AT2G36230;AT2G36240;AT2G36250;AT2G36255;AT2G36260;AT2G36261;AT2G36270…
ONT.2770.47	AT1G04890;AT1G04900;AT1G04910;AT1G04920;AT1G04930;AT1G04940;AT1G04945;AT1G04950;AT1G04960;AT1G04970;AT1G04980;AT1G04985;AT1G04990;AT1G05000;AT1G05010;AT1G05020;AT1G05030;AT1G05040;AT1G05055;AT1G05060;AT1G05065;AT1G05070;AT1G05080;AT1G05085;AT1G05090;AT1G05100;AT1G05120;AT1G05136;AT1G05140;AT1G05150;AT1G05160;AT1G05170;AT1G05180;AT1G05190;AT1G05200;AT1G05205;AT1G05210;AT1G05220;AT1G05230;AT1G05240…
ONT.2770.30	AT1G04890;AT1G04900;AT1G04910;AT1G04920;AT1G04930;AT1G04940;AT1G04945;AT1G04950;AT1G04960;AT1G04970;AT1G04980;AT1G04985;AT1G04990;AT1G05000;AT1G05010;AT1G05020;AT1G05030;AT1G05040;AT1G05055;AT1G05060;AT1G05065;AT1G05070;AT1G05080;AT1G05085;AT1G05090;AT1G05100;AT1G05120;AT1G05136;AT1G05140;AT1G05150;AT1G05160;AT1G05170;AT1G05180;AT1G05190;AT1G05200;AT1G05205;AT1G05210;AT1G05220;AT1G05230;AT1G05240…
ONT.1970.1	AT1G65290;AT1G65295;AT1G65300;AT1G65310;AT1G65320;AT1G65330;AT1G65340;AT1G65342;AT1G65346;AT1G65350;AT1G65352;AT1G65360;AT1G65370;AT1G65380;AT1G65390;AT1G65410;AT1G65420;AT1G65430;AT1G65440;AT1G65450;AT1G65470;AT1G65480;AT1G65481;AT1G65483;AT1G65484;AT1G65486;AT1G65490;AT1G65500;AT1G65510;AT1G65520;AT1G65540;AT1G65541;AT1G65550;AT1G65560;AT1G65570;AT1G65580;AT1G65590;AT1G65610;AT1G65620;AT1G65630…
ONT.2000.1	AT1G66245;AT1G66250;AT1G66260;AT1G66270;AT1G66280;AT1G66290;AT1G66300;AT1G66310;AT1G66320;AT1G66330;AT1G66340;AT1G66345;AT1G66350;AT1G66360;AT1G66370;AT1G66380;AT1G66390;AT1G66400;AT1G66410;AT1G66420;AT1G66430;AT1G66440;AT1G66450;AT1G66470;AT1G66475;AT1G66480;AT1G66490;AT1G66500;AT1G66510;AT1G66520;AT1G66530;AT1G66540;AT1G66550;AT1G66553;AT1G66560;AT1G66570;AT1G66580;AT1G66590;AT1G66600;AT1G66610…
ONT.2022.1	AT1G67050;AT1G67060;AT1G67070;AT1G67080;AT1G67090;AT1G67100;AT1G67110;AT1G67120;AT1G67130;AT1G67140;AT1G67148;AT1G67150;AT1G67160;AT1G67170;AT1G67180;AT1G67190;AT1G67210;AT1G67220;AT1G67230;AT1G67250;AT1G67260;AT1G67265;AT1G67270;AT1G67280;AT1G67290;AT1G67300;AT1G67310;AT1G67320;AT1G67325;AT1G67330;ONT.2021;ONT.4565;ONT.4575
ONT.4635.1	AT1G68700;AT1G68710;AT1G68720;AT1G68725;AT1G68730;AT1G68740;AT1G68750;AT1G68760;AT1G68765;AT1G68780;AT1G68790;AT1G68795;AT1G68800;AT1G68810;AT1G68820;AT1G68825;AT1G68830;AT1G68840;AT1G68845;AT1G68850;AT1G68862;AT1G68870;AT1G68875;AT1G68880;AT1G68890;AT1G68905;AT1G68907;AT1G68910;AT1G68920;AT1G68930;AT1G68935;AT1G68940;AT1G68945;AT1G68960;AT1G68980;AT1G68990;AT1G69010;AT1G69020;AT1G69030;AT1G69040…
ONT.9289.4	AT3G41762;AT3G42050;AT3G42060;AT3G42130;AT3G42140;AT3G42148;AT3G42150;AT3G42155;AT3G42160;AT3G42170;AT3G42180;ONT.9285;ONT.9286;ONT.9287;ONT.9288
ONT.19578.1	ATMG00680;ATMG00690;ATMG00710;ATMG00720;ATMG00730;ATMG00740;ATMG00750;ATMG00760;ATMG00770;ATMG00810;ATMG00820;ATMG00830;ATMG00840;ATMG00850;ATMG00860;ATMG00870;ATMG00880;ATMG00890;ATMG00900;ATMG00910;ATMG00920;ATMG00940;ATMG00960;ATMG00970;ATMG00980;ATMG00990;ATMG01000;ATMG01010;ATMG01020;ATMG01030;ATMG01040;ATMG01050;ATMG01060;ATMG01080;ATMG01090;ATMG01100;ATMG01110;ATMG01130;ATMG01140;ATMG01150…
ONT.7801.1	AT2G40435;AT2G40440;AT2G40450;AT2G40460;AT2G40470;AT2G40475;AT2G40480;AT2G40490;AT2G40500;AT2G40510;AT2G40520;AT2G40530;AT2G40540;AT2G40550;AT2G40560;AT2G40570;AT2G40580;AT2G40590;AT2G40600;AT2G40610;AT2G40620;AT2G40630;AT2G40640;AT2G40650;AT2G40660;AT2G40670;AT2G40690;AT2G40700;AT2G40710;AT2G40711;AT2G40720;AT2G40730;AT2G40740;AT2G40745;AT2G40750;AT2G40760;AT2G40765;AT2G40770;AT2G40780;AT2G40790…
ONT.18975.1	AT5G55620;AT5G55630;AT5G55640;AT5G55650;AT5G55660;AT5G55670;AT5G55680;AT5G55690;AT5G55700;AT5G55710;AT5G55720;AT5G55730;AT5G55740;AT5G55750;AT5G55760;AT5G55770;AT5G55780;AT5G55790;AT5G55800;AT5G55810;AT5G55820;AT5G55830;AT5G55840;AT5G55850;AT5G55855;AT5G55856;AT5G55860;AT5G55870;AT5G55880;AT5G55890;AT5G55893;AT5G55900;AT5G55910;AT5G55920;AT5G55930;AT5G55940;AT5G55950;AT5G55960;AT5G55970;AT5G55980…
ONT.8047.2	AT2G46360;AT2G46370;AT2G46375;AT2G46380;AT2G46390;AT2G46400;AT2G46410;AT2G46420;AT2G46430;AT2G46440;AT2G46450;AT2G46455;AT2G46460;AT2G46470;AT2G46480;AT2G46490;AT2G46493;AT2G46494;AT2G46495;AT2G46500;AT2G46505;AT2G46510;AT2G46520;AT2G46530;AT2G46535;AT2G46540;AT2G46550;AT2G46560;AT2G46567;AT2G46570;AT2G46580;AT2G46590;AT2G46600;AT2G46610;AT2G46620;AT2G46630;AT2G46640;AT2G46650;AT2G46660;AT2G46662…
ONT.12195.8	AT4G07515;AT4G07524;AT4G07526
ONT.12360.2	AT4G13310;AT4G13320;AT4G13330;AT4G13340;AT4G13345;AT4G13350;AT4G13360;AT4G13370;AT4G13380;AT4G13390;AT4G13395;AT4G13400;AT4G13410;AT4G13420;AT4G13430;AT4G13440;AT4G13450;AT4G13460;AT4G13480;AT4G13490;AT4G13500;AT4G13510;AT4G13520;AT4G13530;AT4G13540;AT4G13550;AT4G13560;AT4G13570;AT4G13572;AT4G13575;AT4G13580;AT4G13590;AT4G13600;AT4G13610;AT4G13615;AT4G13620;AT4G13630;AT4G13640;AT4G13650;ONT.12359…
ONT.6786.1	AT2G07750;AT2G07760;AT2G07981;AT2G08986;AT2G09388;AT2G09838;AT2G09840
ONT.2770.14	AT1G04890;AT1G04900;AT1G04910;AT1G04920;AT1G04930;AT1G04940;AT1G04945;AT1G04950;AT1G04960;AT1G04970;AT1G04980;AT1G04985;AT1G04990;AT1G05000;AT1G05010;AT1G05020;AT1G05030;AT1G05040;AT1G05055;AT1G05060;AT1G05065;AT1G05070;AT1G05080;AT1G05085;AT1G05090;AT1G05100;AT1G05120;AT1G05136;AT1G05140;AT1G05150;AT1G05160;AT1G05170;AT1G05180;AT1G05190;AT1G05200;AT1G05205;AT1G05210;AT1G05220;AT1G05230;AT1G05240…
ONT.272.3	AT1G07620;AT1G07630;AT1G07640;AT1G07645;AT1G07650;AT1G07660;AT1G07670;AT1G07680;AT1G07690;AT1G07700;AT1G07705;AT1G07710;AT1G07720;AT1G07725;AT1G07730;AT1G07740;AT1G07745;AT1G07747;AT1G07750;AT1G07770;AT1G07780;AT1G07790;AT1G07795;AT1G07810;AT1G07820;AT1G07830;AT1G07840;AT1G07850;AT1G07860;AT1G07870;AT1G07880;AT1G07885;AT1G07890;AT1G07900;AT1G07901;AT1G07910;AT1G07930;AT1G07940;AT1G07950;AT1G07960…
ONT.1287.3	AT1G34260;AT1G34270;AT1G34280;AT1G34290;AT1G34300;AT1G34310;AT1G34315;AT1G34320;AT1G34340;AT1G34350;AT1G34355;AT1G34360;AT1G34370;AT1G34380;AT1G34390;AT1G34400;AT1G34410;AT1G34419;AT1G34420;AT1G34430;AT1G34440;AT1G34460;AT1G34470;AT1G34480;AT1G34490;AT1G34500;AT1G34510;AT1G34520;AT1G34540;AT1G34550;AT1G34560;AT1G34570;AT1G34575;AT1G34580;ONT.1282
ONT.6104.41	AT2G35890;AT2G35900;AT2G35910;AT2G35920;AT2G35930;AT2G35940;AT2G35950;AT2G35960;AT2G35970;AT2G35980;AT2G35990;AT2G36000;AT2G36010;AT2G36020;AT2G36026;AT2G36030;AT2G36050;AT2G36053;AT2G36060;AT2G36070;AT2G36080;AT2G36090;AT2G36100;AT2G36110;AT2G36130;AT2G36145;AT2G36160;AT2G36170;AT2G36180;AT2G36190;AT2G36200;AT2G36210;AT2G36220;AT2G36230;AT2G36240;AT2G36250;AT2G36255;AT2G36260;AT2G36261;AT2G36270…
ONT.5763.1	AT2G26450;AT2G26460;AT2G26470;AT2G26480;AT2G26490;AT2G26500;AT2G26510;AT2G26511;AT2G26520;AT2G26530;AT2G26540;AT2G26550;AT2G26560;AT2G26570;AT2G26580;AT2G26590;AT2G26600;AT2G26610;AT2G26620;AT2G26640;AT2G26650;AT2G26660;AT2G26670;AT2G26680;AT2G26690;AT2G26695;AT2G26700;AT2G26710;AT2G26720;AT2G26730;AT2G26740;AT2G26750;AT2G26760;AT2G26770;AT2G26780;AT2G26790;AT2G26800;AT2G26810;AT2G26820;AT2G26830…
ONT.2770.29	AT1G04890;AT1G04900;AT1G04910;AT1G04920;AT1G04930;AT1G04940;AT1G04945;AT1G04950;AT1G04960;AT1G04970;AT1G04980;AT1G04985;AT1G04990;AT1G05000;AT1G05010;AT1G05020;AT1G05030;AT1G05040;AT1G05055;AT1G05060;AT1G05065;AT1G05070;AT1G05080;AT1G05085;AT1G05090;AT1G05100;AT1G05120;AT1G05136;AT1G05140;AT1G05150;AT1G05160;AT1G05170;AT1G05180;AT1G05190;AT1G05200;AT1G05205;AT1G05210;AT1G05220;AT1G05230;AT1G05240…
ONT.13654.1	AT4G07940;AT4G07950;AT4G07960;AT4G07965;AT4G07990;AT4G08025;AT4G08028;AT4G08039;AT4G08040
ONT.14942.1	AT5G01010;AT5G01015;AT5G01020;AT5G01030;AT5G01040;AT5G01050;AT5G01060;AT5G01070;AT5G01075;AT5G01080;AT5G01090;AT5G01100;AT5G01110;AT5G01120;AT5G01130;AT5G01140;AT5G01150;AT5G01160;AT5G01170;AT5G01180;AT5G01190;AT5G01200;AT5G01210;AT5G01220;AT5G01225;AT5G01230;AT5G01240;AT5G01250;AT5G01260;AT5G01270;AT5G01280;AT5G01290;AT5G01300;AT5G01310;AT5G01320;AT5G01330;AT5G01340;AT5G01350;AT5G01360;AT5G01370…
ONT.7457.38	AT2G32430;AT2G32440;AT2G32450;AT2G32460;AT2G32470;AT2G32480;AT2G32487;AT2G32500;AT2G32510;AT2G32520;AT2G32530;AT2G32540;AT2G32550;AT2G32560;AT2G32580;AT2G32590;AT2G32600;AT2G32610;AT2G32620;AT2G32630;AT2G32640;AT2G32645;AT2G32650;AT2G32660;AT2G32670;AT2G32680;AT2G32700;AT2G32710;AT2G32720;AT2G32730;AT2G32740;AT2G32750;AT2G32760;AT2G32765;AT2G32770;AT2G32780;AT2G32785;AT2G32788;AT2G32790;AT2G32800…
ONT.9240.1	AT3G28410;AT3G28415;AT3G28420;AT3G28430;AT3G28440;AT3G28450;AT3G28455;AT3G28460;AT3G28470;AT3G28480;AT3G28490;AT3G28500;AT3G28510;AT3G28520;AT3G28530;AT3G28540;AT3G28550;AT3G28560;AT3G28570;AT3G28580;AT3G28590;AT3G28600;AT3G28610;AT3G28620;AT3G28630;AT3G28640;AT3G28650;AT3G28660;AT3G28670;AT3G28674;AT3G28680;AT3G28690;AT3G28700;AT3G28710;AT3G28715;AT3G28720;AT3G28730;AT3G28740;AT3G28750;AT3G28760…
ONT.17398.1	AT5G05090;AT5G05100;AT5G05110;AT5G05113;AT5G05120;AT5G05130;AT5G05140;AT5G05150;AT5G05160;AT5G05170;AT5G05180;AT5G05190;AT5G05200;AT5G05210;AT5G05220;AT5G05230;AT5G05240;AT5G05250;AT5G05260;AT5G05270;AT5G05280;AT5G05290;AT5G05300;AT5G05310;AT5G05320;AT5G05330;AT5G05340;AT5G05350;AT5G05360;AT5G05365;AT5G05370;AT5G05380;AT5G05390;AT5G05410;AT5G05420;AT5G05430;AT5G05440;AT5G05450;AT5G05460;AT5G05470…
ONT.6104.44	AT2G35890;AT2G35900;AT2G35910;AT2G35920;AT2G35930;AT2G35940;AT2G35950;AT2G35960;AT2G35970;AT2G35980;AT2G35990;AT2G36000;AT2G36010;AT2G36020;AT2G36026;AT2G36030;AT2G36050;AT2G36053;AT2G36060;AT2G36070;AT2G36080;AT2G36090;AT2G36100;AT2G36110;AT2G36130;AT2G36145;AT2G36160;AT2G36170;AT2G36180;AT2G36190;AT2G36200;AT2G36210;AT2G36220;AT2G36230;AT2G36240;AT2G36250;AT2G36255;AT2G36260;AT2G36261;AT2G36270…
ONT.2770.27	AT1G04890;AT1G04900;AT1G04910;AT1G04920;AT1G04930;AT1G04940;AT1G04945;AT1G04950;AT1G04960;AT1G04970;AT1G04980;AT1G04985;AT1G04990;AT1G05000;AT1G05010;AT1G05020;AT1G05030;AT1G05040;AT1G05055;AT1G05060;AT1G05065;AT1G05070;AT1G05080;AT1G05085;AT1G05090;AT1G05100;AT1G05120;AT1G05136;AT1G05140;AT1G05150;AT1G05160;AT1G05170;AT1G05180;AT1G05190;AT1G05200;AT1G05205;AT1G05210;AT1G05220;AT1G05230;AT1G05240…
ONT.12195.12	AT4G07515;AT4G07524;AT4G07526
ONT.2771.1	AT1G04890;AT1G04900;AT1G04910;AT1G04920;AT1G04930;AT1G04940;AT1G04945;AT1G04950;AT1G04960;AT1G04970;AT1G04980;AT1G04985;AT1G04990;AT1G05000;AT1G05010;AT1G05020;AT1G05030;AT1G05040;AT1G05055;AT1G05060;AT1G05065;AT1G05070;AT1G05080;AT1G05085;AT1G05090;AT1G05100;AT1G05120;AT1G05136;AT1G05140;AT1G05150;AT1G05160;AT1G05170;AT1G05180;AT1G05190;AT1G05200;AT1G05205;AT1G05210;AT1G05220;AT1G05230;AT1G05240…
ONT.6367.1	AT2G42400;AT2G42410;AT2G42430;AT2G42440;AT2G42450;AT2G42460;AT2G42470;AT2G42480;AT2G42490;AT2G42500;AT2G42510;AT2G42520;AT2G42530;AT2G42540;AT2G42550;AT2G42560;AT2G42570;AT2G42580;AT2G42590;AT2G42600;AT2G42610;AT2G42620;AT2G42640;AT2G42650;AT2G42660;AT2G42670;AT2G42680;AT2G42690;AT2G42700;AT2G42710;AT2G42720;AT2G42730;AT2G42740;AT2G42750;AT2G42760;AT2G42770;AT2G42780;AT2G42790;AT2G42800;AT2G42810…
ONT.6104.61	AT2G35890;AT2G35900;AT2G35910;AT2G35920;AT2G35930;AT2G35940;AT2G35950;AT2G35960;AT2G35970;AT2G35980;AT2G35990;AT2G36000;AT2G36010;AT2G36020;AT2G36026;AT2G36030;AT2G36050;AT2G36053;AT2G36060;AT2G36070;AT2G36080;AT2G36090;AT2G36100;AT2G36110;AT2G36130;AT2G36145;AT2G36160;AT2G36170;AT2G36180;AT2G36190;AT2G36200;AT2G36210;AT2G36220;AT2G36230;AT2G36240;AT2G36250;AT2G36255;AT2G36260;AT2G36261;AT2G36270…
ONT.5616.2	AT2G22490;AT2G22500;AT2G22510;AT2G22520;AT2G22530;AT2G22540;AT2G22560;AT2G22570;AT2G22590;AT2G22600;AT2G22610;AT2G22620;AT2G22630;AT2G22640;AT2G22650;AT2G22660;AT2G22670;AT2G22680;AT2G22690;AT2G22720;AT2G22730;AT2G22740;AT2G22750;AT2G22760;AT2G22770;AT2G22780;AT2G22790;AT2G22795;AT2G22800;AT2G22802;AT2G22805;AT2G22807;AT2G22810;AT2G22820;AT2G22830;AT2G22840;AT2G22850;AT2G22860;AT2G22870;AT2G22880…
ONT.2770.6	AT1G04890;AT1G04900;AT1G04910;AT1G04920;AT1G04930;AT1G04940;AT1G04945;AT1G04950;AT1G04960;AT1G04970;AT1G04980;AT1G04985;AT1G04990;AT1G05000;AT1G05010;AT1G05020;AT1G05030;AT1G05040;AT1G05055;AT1G05060;AT1G05065;AT1G05070;AT1G05080;AT1G05085;AT1G05090;AT1G05100;AT1G05120;AT1G05136;AT1G05140;AT1G05150;AT1G05160;AT1G05170;AT1G05180;AT1G05190;AT1G05200;AT1G05205;AT1G05210;AT1G05220;AT1G05230;AT1G05240…
ONT.10539.2	AT3G12560;AT3G12570;AT3G12580;AT3G12587;AT3G12590;AT3G12600;AT3G12610;AT3G12620;AT3G12630;AT3G12640;AT3G12650;AT3G12660;AT3G12670;AT3G12680;AT3G12685;AT3G12690;AT3G12700;AT3G12710;AT3G12720;AT3G12730;AT3G12740;AT3G12750;AT3G12760;AT3G12770;AT3G12775;AT3G12780;AT3G12800;AT3G12810;AT3G12820;AT3G12835;AT3G12840;AT3G12850;AT3G12860;AT3G12870;AT3G12880;AT3G12890;AT3G12900;AT3G12910;AT3G12915;AT3G12920…
ONT.2770.7	AT1G04890;AT1G04900;AT1G04910;AT1G04920;AT1G04930;AT1G04940;AT1G04945;AT1G04950;AT1G04960;AT1G04970;AT1G04980;AT1G04985;AT1G04990;AT1G05000;AT1G05010;AT1G05020;AT1G05030;AT1G05040;AT1G05055;AT1G05060;AT1G05065;AT1G05070;AT1G05080;AT1G05085;AT1G05090;AT1G05100;AT1G05120;AT1G05136;AT1G05140;AT1G05150;AT1G05160;AT1G05170;AT1G05180;AT1G05190;AT1G05200;AT1G05205;AT1G05210;AT1G05220;AT1G05230;AT1G05240…
ONT.13804.6	AT4G12750;AT4G12760;AT4G12770;AT4G12780;AT4G12790;AT4G12800;AT4G12810;AT4G12820;AT4G12825;AT4G12830;AT4G12840;AT4G12850;AT4G12860;AT4G12870;AT4G12880;AT4G12890;AT4G12900;AT4G12910;AT4G12920;AT4G12930;AT4G12940;AT4G12950;AT4G12960;AT4G12970;AT4G12980;AT4G13000;AT4G13010;AT4G13020;AT4G13030;AT4G13040;AT4G13050;AT4G13060;AT4G13070;AT4G13075;AT4G13080;AT4G13090;AT4G13095;AT4G13100;AT4G13110;AT4G13130…
ONT.9615.2	AT3G52470;AT3G52480;AT3G52490;AT3G52500;AT3G52510;AT3G52520;AT3G52525;AT3G52530;AT3G52540;AT3G52550;AT3G52560;AT3G52561;AT3G52570;AT3G52580;AT3G52590;AT3G52600;AT3G52610;AT3G52620;AT3G52630;AT3G52640;AT3G52660;AT3G52670;AT3G52680;AT3G52690;AT3G52700;AT3G52710;AT3G52720;AT3G52730;AT3G52740;AT3G52750;AT3G52760;AT3G52770;AT3G52780;AT3G52790;AT3G52800;AT3G52810;AT3G52820;AT3G52830;AT3G52840;AT3G52850…
ONT.3838.1	AT1G33400;AT1G33410;AT1G33420;AT1G33430;AT1G33440;AT1G33470;AT1G33475;AT1G33480;AT1G33490;AT1G33500;AT1G33520;AT1G33530;AT1G33540;AT1G33560;AT1G33590;AT1G33600;AT1G33607;AT1G33610;AT1G33612;AT1G33640;AT1G33670;AT1G33680;AT1G33700;AT1G33709;AT1G33710;AT1G33720;AT1G33730;AT1G33750;AT1G33760;AT1G33770;AT1G33780;AT1G33790;AT1G33800;AT1G33810;AT1G33811;AT1G33820;AT1G33830;AT1G33840;AT1G33850;AT1G33860…
ONT.17816.2	AT5G15948;AT5G15950;AT5G15960;AT5G15970;AT5G15980;AT5G16000;AT5G16010;AT5G16020;AT5G16023;AT5G16030;AT5G16040;AT5G16050;AT5G16060;AT5G16070;AT5G16080;AT5G16090;AT5G16100;AT5G16110;AT5G16120;AT5G16130;AT5G16140;AT5G16150;AT5G16160;AT5G16170;AT5G16180;AT5G16190;AT5G16200;AT5G16210;AT5G16220;AT5G16230;AT5G16240;AT5G16250;AT5G16260;AT5G16270;AT5G16280;AT5G16285;AT5G16286;AT5G16290;AT5G16300;AT5G16310…
ONT.6104.47	AT2G35890;AT2G35900;AT2G35910;AT2G35920;AT2G35930;AT2G35940;AT2G35950;AT2G35960;AT2G35970;AT2G35980;AT2G35990;AT2G36000;AT2G36010;AT2G36020;AT2G36026;AT2G36030;AT2G36050;AT2G36053;AT2G36060;AT2G36070;AT2G36080;AT2G36090;AT2G36100;AT2G36110;AT2G36130;AT2G36145;AT2G36160;AT2G36170;AT2G36180;AT2G36190;AT2G36200;AT2G36210;AT2G36220;AT2G36230;AT2G36240;AT2G36250;AT2G36255;AT2G36260;AT2G36261;AT2G36270…
ONT.6104.24	AT2G35890;AT2G35900;AT2G35910;AT2G35920;AT2G35930;AT2G35940;AT2G35950;AT2G35960;AT2G35970;AT2G35980;AT2G35990;AT2G36000;AT2G36010;AT2G36020;AT2G36026;AT2G36030;AT2G36050;AT2G36053;AT2G36060;AT2G36070;AT2G36080;AT2G36090;AT2G36100;AT2G36110;AT2G36130;AT2G36145;AT2G36160;AT2G36170;AT2G36180;AT2G36190;AT2G36200;AT2G36210;AT2G36220;AT2G36230;AT2G36240;AT2G36250;AT2G36255;AT2G36260;AT2G36261;AT2G36270…
ONT.10854.18	AT3G20170;AT3G20180;AT3G20190;AT3G20200;AT3G20210;AT3G20220;AT3G20230;AT3G20240;AT3G20250;AT3G20260;AT3G20270;AT3G20280;AT3G20290;AT3G20300;AT3G20310;AT3G20320;AT3G20330;AT3G20340;AT3G20350;AT3G20360;AT3G20362;AT3G20370;AT3G20380;AT3G20390;AT3G20395;AT3G20400;AT3G20410;AT3G20420;AT3G20430;AT3G20440;AT3G20450;AT3G20460;AT3G20475;AT3G20480;AT3G20490;AT3G20500;AT3G20510;AT3G20520;AT3G20530;AT3G20540…
ONT.6104.33	AT2G35890;AT2G35900;AT2G35910;AT2G35920;AT2G35930;AT2G35940;AT2G35950;AT2G35960;AT2G35970;AT2G35980;AT2G35990;AT2G36000;AT2G36010;AT2G36020;AT2G36026;AT2G36030;AT2G36050;AT2G36053;AT2G36060;AT2G36070;AT2G36080;AT2G36090;AT2G36100;AT2G36110;AT2G36130;AT2G36145;AT2G36160;AT2G36170;AT2G36180;AT2G36190;AT2G36200;AT2G36210;AT2G36220;AT2G36230;AT2G36240;AT2G36250;AT2G36255;AT2G36260;AT2G36261;AT2G36270…
ONT.7191.2	AT2G25735;AT2G25737;AT2G25740;AT2G25760;AT2G25770;AT2G25780;AT2G25790;AT2G25800;AT2G25810;AT2G25820;AT2G25830;AT2G25840;AT2G25850;AT2G25870;AT2G25880;AT2G25890;AT2G25900;AT2G25910;AT2G25920;AT2G25930;AT2G25940;AT2G25970;AT2G25980;AT2G25990;AT2G26000;AT2G26010;AT2G26020;AT2G26030;AT2G26040;AT2G26050;AT2G26060;AT2G26070;AT2G26080;AT2G26100;AT2G26110;AT2G26120;AT2G26130;AT2G26135;AT2G26140;AT2G26150…
ONT.2770.44	AT1G04890;AT1G04900;AT1G04910;AT1G04920;AT1G04930;AT1G04940;AT1G04945;AT1G04950;AT1G04960;AT1G04970;AT1G04980;AT1G04985;AT1G04990;AT1G05000;AT1G05010;AT1G05020;AT1G05030;AT1G05040;AT1G05055;AT1G05060;AT1G05065;AT1G05070;AT1G05080;AT1G05085;AT1G05090;AT1G05100;AT1G05120;AT1G05136;AT1G05140;AT1G05150;AT1G05160;AT1G05170;AT1G05180;AT1G05190;AT1G05200;AT1G05205;AT1G05210;AT1G05220;AT1G05230;AT1G05240…
ONT.4293.1	AT1G58340;AT1G58350;AT1G58360;AT1G58370;AT1G58380;AT1G58390;AT1G58400;AT1G58410;AT1G58420;AT1G58430;AT1G58440;AT1G58450;AT1G58460;AT1G58470;AT1G58520;AT1G58602;AT1G58643;AT1G58684;AT1G58725;AT1G58766;AT1G58807;AT1G58848;AT1G58936;AT1G58983;AT1G59030;AT1G59077;AT1G59124;AT1G59171;AT1G59218;AT1G59312;AT1G59359
ONT.13804.5	AT4G12750;AT4G12760;AT4G12770;AT4G12780;AT4G12790;AT4G12800;AT4G12810;AT4G12820;AT4G12825;AT4G12830;AT4G12840;AT4G12850;AT4G12860;AT4G12870;AT4G12880;AT4G12890;AT4G12900;AT4G12910;AT4G12920;AT4G12930;AT4G12940;AT4G12950;AT4G12960;AT4G12970;AT4G12980;AT4G13000;AT4G13010;AT4G13020;AT4G13030;AT4G13040;AT4G13050;AT4G13060;AT4G13070;AT4G13075;AT4G13080;AT4G13090;AT4G13095;AT4G13100;AT4G13110;AT4G13130…
ONT.17109.1	AT5G64740;AT5G64750;AT5G64760;AT5G64770;AT5G64780;AT5G64790;AT5G64800;AT5G64810;AT5G64813;AT5G64816;AT5G64820;AT5G64830;AT5G64840;AT5G64850;AT5G64860;AT5G64870;AT5G64880;AT5G64890;AT5G64900;AT5G64905;AT5G64910;AT5G64920;AT5G64930;AT5G64940;AT5G64950;AT5G64960;AT5G64970;AT5G64980;AT5G64990;AT5G65000;AT5G65005;AT5G65010;AT5G65020;AT5G65030;AT5G65040;AT5G65050;AT5G65060;AT5G65070;AT5G65080;AT5G65090…
ONT.1287.2	AT1G34260;AT1G34270;AT1G34280;AT1G34290;AT1G34300;AT1G34310;AT1G34315;AT1G34320;AT1G34340;AT1G34350;AT1G34355;AT1G34360;AT1G34370;AT1G34380;AT1G34390;AT1G34400;AT1G34410;AT1G34419;AT1G34420;AT1G34430;AT1G34440;AT1G34460;AT1G34470;AT1G34480;AT1G34490;AT1G34500;AT1G34510;AT1G34520;AT1G34540;AT1G34550;AT1G34560;AT1G34570;AT1G34575;AT1G34580;ONT.1282
ONT.3200.1	AT1G14860;AT1G14870;AT1G14880;AT1G14890;AT1G14900;AT1G14910;AT1G14920;AT1G14930;AT1G14940;AT1G14950;AT1G14960;AT1G14970;AT1G14980;AT1G14990;AT1G15000;AT1G15010;AT1G15015;AT1G15020;AT1G15030;AT1G15040;AT1G15045;AT1G15050;AT1G15060;AT1G15080;AT1G15100;AT1G15110;AT1G15120;AT1G15125;AT1G15130;AT1G15140;AT1G15150;AT1G15160;AT1G15165;AT1G15170;AT1G15180;AT1G15190;AT1G15200;AT1G15210;AT1G15215;AT1G15220…
ONT.5270.3	AT2G05294;AT2G05310;AT2G05320;AT2G05330;AT2G05335;AT2G05350;AT2G05360;AT2G05370;AT2G05380;AT2G05400;AT2G05410;AT2G05420;AT2G05430;AT2G05440;AT2G05500;AT2G05510;AT2G05520;AT2G05530;AT2G05540;AT2G05580;AT2G05590;AT2G05600;AT2G05620;AT2G05630;AT2G05632;AT2G05635;AT2G05642;AT2G05645;ONT.5264;ONT.5265
ONT.19377.2	AT5G65370;AT5G65380;AT5G65390;AT5G65400;AT5G65410;AT5G65420;AT5G65430;AT5G65440;AT5G65450;AT5G65460;AT5G65470;AT5G65480;AT5G65490;AT5G65495;AT5G65500;AT5G65510;AT5G65520;AT5G65530;AT5G65533;AT5G65540;AT5G65550;AT5G65560;AT5G65570;AT5G65580;AT5G65590;AT5G65600;AT5G65609;AT5G65610;AT5G65620;AT5G65630;AT5G65640;AT5G65650;AT5G65660;AT5G65670;AT5G65683;AT5G65685;AT5G65687;AT5G65690;AT5G65700;AT5G65710…
ONT.9606.1	AT3G52270;AT3G52280;AT3G52290;AT3G52300;AT3G52302;AT3G52310;AT3G52320;AT3G52330;AT3G52340;AT3G52350;AT3G52360;AT3G52370;AT3G52380;AT3G52390;AT3G52400;AT3G52420;AT3G52430;AT3G52440;AT3G52450;AT3G52460;AT3G52470;AT3G52480;AT3G52490;AT3G52500;AT3G52510;AT3G52520;AT3G52525;AT3G52540;AT3G52550;AT3G52560;AT3G52561;AT3G52570;AT3G52580;AT3G52590;AT3G52600;AT3G52610;AT3G52620;AT3G52630;AT3G52640;AT3G52660…
ONT.12195.1	AT4G07515;AT4G07524;AT4G07526
ONT.2108.3	AT1G69010;AT1G69020;AT1G69030;AT1G69040;AT1G69050;AT1G69060;AT1G69070;AT1G69080;AT1G69090;AT1G69100;AT1G69120;AT1G69150;AT1G69160;AT1G69170;AT1G69180;AT1G69190;AT1G69200;AT1G69210;AT1G69220;AT1G69230;AT1G69240;AT1G69250;AT1G69260;AT1G69270;AT1G69280;AT1G69290;AT1G69295;AT1G69310;AT1G69320;AT1G69325;AT1G69330;AT1G69340;AT1G69350;AT1G69360;AT1G69370;AT1G69380;AT1G69390;AT1G69400;AT1G69410;AT1G69420…
ONT.12198.1	AT4G07940;AT4G07950;AT4G07960;AT4G07965;AT4G07990;AT4G08025;AT4G08028;AT4G08039;AT4G08040;AT4G08073
ONT.2821.2	AT1G06080;AT1G06090;AT1G06100;AT1G06110;AT1G06120;AT1G06130;AT1G06135;AT1G06137;AT1G06140;AT1G06148;AT1G06149;AT1G06150;AT1G06160;AT1G06170;AT1G06180;AT1G06190;AT1G06200;AT1G06210;AT1G06220;AT1G06225;AT1G06230;AT1G06240;AT1G06250;AT1G06260;AT1G06270;AT1G06280;AT1G06290;AT1G06310;AT1G06320;AT1G06330;AT1G06340;AT1G06350;AT1G06360;AT1G06380;AT1G06390;AT1G06400;AT1G06410;AT1G06420;AT1G06430;AT1G06440…
ONT.6104.35	AT2G35890;AT2G35900;AT2G35910;AT2G35920;AT2G35930;AT2G35940;AT2G35950;AT2G35960;AT2G35970;AT2G35980;AT2G35990;AT2G36000;AT2G36010;AT2G36020;AT2G36026;AT2G36030;AT2G36050;AT2G36053;AT2G36060;AT2G36070;AT2G36080;AT2G36090;AT2G36100;AT2G36110;AT2G36130;AT2G36145;AT2G36160;AT2G36170;AT2G36180;AT2G36190;AT2G36200;AT2G36210;AT2G36220;AT2G36230;AT2G36240;AT2G36250;AT2G36255;AT2G36260;AT2G36261;AT2G36270…
ONT.6764.1	AT2G05440;AT2G05500;AT2G05510;AT2G05520;AT2G05530;AT2G05540;AT2G05580;AT2G05590;AT2G05600;AT2G05620;AT2G05630;AT2G05635;AT2G05642;AT2G05645;AT2G05710;AT2G05720;AT2G05752;AT2G05753;AT2G05755;AT2G05760;ONT.6765
ONT.8554.3	AT3G11920;AT3G11930;AT3G11940;AT3G11945;AT3G11950;AT3G11960;AT3G11964;AT3G11980;AT3G11990;AT3G12000;AT3G12010;AT3G12020;AT3G12030;AT3G12040;AT3G12050;AT3G12060;AT3G12070;AT3G12080;AT3G12090;AT3G12100;AT3G12110;AT3G12120;AT3G12130;AT3G12140;AT3G12145;AT3G12150;AT3G12160;AT3G12170;AT3G12180;AT3G12190;AT3G12200;AT3G12203;AT3G12210;AT3G12220;AT3G12230;AT3G12240;AT3G12250;AT3G12260;AT3G12270;AT3G12280…
ONT.7457.48	AT2G32430;AT2G32440;AT2G32450;AT2G32460;AT2G32470;AT2G32480;AT2G32487;AT2G32500;AT2G32510;AT2G32520;AT2G32530;AT2G32540;AT2G32550;AT2G32560;AT2G32580;AT2G32590;AT2G32600;AT2G32610;AT2G32620;AT2G32630;AT2G32640;AT2G32645;AT2G32650;AT2G32660;AT2G32670;AT2G32680;AT2G32700;AT2G32710;AT2G32720;AT2G32730;AT2G32740;AT2G32750;AT2G32760;AT2G32765;AT2G32770;AT2G32780;AT2G32785;AT2G32788;AT2G32790;AT2G32800…
ONT.9280.1	AT3G30705;AT3G30720;AT3G30725;AT3G30730;AT3G30768;AT3G30769;AT3G30770;AT3G30775;AT3G30778
ONT.13646.4	AT4G06676;AT4G06688
ONT.2770.48	AT1G04890;AT1G04900;AT1G04910;AT1G04920;AT1G04930;AT1G04940;AT1G04945;AT1G04950;AT1G04960;AT1G04970;AT1G04980;AT1G04985;AT1G04990;AT1G05000;AT1G05010;AT1G05020;AT1G05030;AT1G05040;AT1G05055;AT1G05060;AT1G05065;AT1G05070;AT1G05080;AT1G05085;AT1G05090;AT1G05100;AT1G05120;AT1G05136;AT1G05140;AT1G05150;AT1G05160;AT1G05170;AT1G05180;AT1G05190;AT1G05200;AT1G05205;AT1G05210;AT1G05220;AT1G05230;AT1G05240…
ONT.2770.16	AT1G04890;AT1G04900;AT1G04910;AT1G04920;AT1G04930;AT1G04940;AT1G04945;AT1G04950;AT1G04960;AT1G04970;AT1G04980;AT1G04985;AT1G04990;AT1G05000;AT1G05010;AT1G05020;AT1G05030;AT1G05040;AT1G05055;AT1G05060;AT1G05065;AT1G05070;AT1G05080;AT1G05085;AT1G05090;AT1G05100;AT1G05120;AT1G05136;AT1G05140;AT1G05150;AT1G05160;AT1G05170;AT1G05180;AT1G05190;AT1G05200;AT1G05205;AT1G05210;AT1G05220;AT1G05230;AT1G05240…
ONT.6104.37	AT2G35890;AT2G35900;AT2G35910;AT2G35920;AT2G35930;AT2G35940;AT2G35950;AT2G35960;AT2G35970;AT2G35980;AT2G35990;AT2G36000;AT2G36010;AT2G36020;AT2G36026;AT2G36030;AT2G36050;AT2G36053;AT2G36060;AT2G36070;AT2G36080;AT2G36090;AT2G36100;AT2G36110;AT2G36130;AT2G36145;AT2G36160;AT2G36170;AT2G36180;AT2G36190;AT2G36200;AT2G36210;AT2G36220;AT2G36230;AT2G36240;AT2G36250;AT2G36255;AT2G36260;AT2G36261;AT2G36270…
ONT.4293.7	AT1G58340;AT1G58350;AT1G58360;AT1G58370;AT1G58380;AT1G58390;AT1G58400;AT1G58410;AT1G58420;AT1G58430;AT1G58440;AT1G58450;AT1G58460;AT1G58470;AT1G58520;AT1G58602;AT1G58643;AT1G58684;AT1G58725;AT1G58766;AT1G58807;AT1G58848;AT1G58936;AT1G58983;AT1G59030;AT1G59077;AT1G59124;AT1G59171;AT1G59218;AT1G59312;AT1G59359
ONT.8320.2	AT3G05858;AT3G05860;AT3G05870;AT3G05880;AT3G05890;AT3G05900;AT3G05910;AT3G05920;AT3G05930;AT3G05935;AT3G05936;AT3G05937;AT3G05940;AT3G05950;AT3G05960;AT3G05970;AT3G05975;AT3G05980;AT3G05990;AT3G06000;AT3G06010;AT3G06019;AT3G06020;AT3G06030;AT3G06035;AT3G06040;AT3G06050;AT3G06060;AT3G06070;AT3G06080;AT3G06090;AT3G06100;AT3G06110;AT3G06120;AT3G06130;AT3G06140;AT3G06142;AT3G06145;AT3G06150;AT3G06160…
ONT.5412.1	AT2G17320;AT2G17340;AT2G17350;AT2G17360;AT2G17370;AT2G17380;AT2G17390;AT2G17410;AT2G17420;AT2G17430;AT2G17440;AT2G17442;AT2G17450;AT2G17470;AT2G17480;AT2G17500;AT2G17510;AT2G17520;AT2G17525;AT2G17530;AT2G17540;AT2G17550;AT2G17556;AT2G17560;AT2G17570;AT2G17580;AT2G17590;AT2G17600;AT2G17620;AT2G17630;AT2G17640;AT2G17650;AT2G17660;AT2G17670;AT2G17680;AT2G17690;AT2G17695;AT2G17700;AT2G17705;AT2G17710…
ONT.7800.1	AT2G40410;AT2G40420;AT2G40430;AT2G40435;AT2G40440;AT2G40450;AT2G40460;AT2G40470;AT2G40475;AT2G40480;AT2G40490;AT2G40500;AT2G40510;AT2G40520;AT2G40530;AT2G40540;AT2G40550;AT2G40560;AT2G40570;AT2G40580;AT2G40590;AT2G40600;AT2G40610;AT2G40620;AT2G40630;AT2G40640;AT2G40650;AT2G40660;AT2G40670;AT2G40690;AT2G40700;AT2G40710;AT2G40711;AT2G40720;AT2G40730;AT2G40740;AT2G40745;AT2G40750;AT2G40760;AT2G40765…
ONT.1175.1	AT1G31050;AT1G31070;AT1G31080;AT1G31090;AT1G31120;AT1G31130;AT1G31140;AT1G31150;AT1G31160;AT1G31163;AT1G31170;AT1G31175;AT1G31180;AT1G31190;AT1G31200;AT1G31220;AT1G31230;AT1G31240;AT1G31250;AT1G31260;AT1G31270;AT1G31280;AT1G31290;AT1G31300;AT1G31310;AT1G31319;AT1G31320;AT1G31330;AT1G31335;AT1G31340;AT1G31350;AT1G31360;AT1G31370;AT1G31380;AT1G31390;AT1G31400;AT1G31410;AT1G31420;AT1G31430;AT1G31440…
ONT.2770.26	AT1G04890;AT1G04900;AT1G04910;AT1G04920;AT1G04930;AT1G04940;AT1G04945;AT1G04950;AT1G04960;AT1G04970;AT1G04980;AT1G04985;AT1G04990;AT1G05000;AT1G05010;AT1G05020;AT1G05030;AT1G05040;AT1G05055;AT1G05060;AT1G05065;AT1G05070;AT1G05080;AT1G05085;AT1G05090;AT1G05100;AT1G05120;AT1G05136;AT1G05140;AT1G05150;AT1G05160;AT1G05170;AT1G05180;AT1G05190;AT1G05200;AT1G05205;AT1G05210;AT1G05220;AT1G05230;AT1G05240…
ONT.13737.1	AT4G10860;AT4G10870;AT4G10880;AT4G10890;AT4G10895;AT4G10910;AT4G10920;AT4G10925;AT4G10930;AT4G10940;AT4G10950;AT4G10955;AT4G10960;AT4G10970;AT4G11000;AT4G11010;AT4G11020;AT4G11030;AT4G11040;AT4G11050;AT4G11060;AT4G11070;AT4G11080;AT4G11090;AT4G11100;AT4G11110;AT4G11120;AT4G11130;AT4G11140;AT4G11150;AT4G11160;AT4G11170;AT4G11175;AT4G11180;AT4G11190;AT4G11210;AT4G11211;AT4G11220;AT4G11230;AT4G11240…
ONT.16057.1	AT5G23411;AT5G37830;AT5G37840;AT5G37850;AT5G37860;AT5G37870;AT5G37890;AT5G37900;AT5G37910;AT5G37920;AT5G37930;AT5G37940;AT5G37950;AT5G37960;AT5G37970;AT5G37980;AT5G37990;AT5G38000;AT5G38010;AT5G38020;AT5G38030;AT5G38040;AT5G38050;AT5G38060;AT5G38070;AT5G38080;AT5G38090;AT5G38100;AT5G38110;AT5G38120;AT5G38130;AT5G38140;AT5G38150;AT5G38160;AT5G38170;AT5G38180;AT5G38190;AT5G38195;AT5G38197;ONT.16053
ONT.18984.1	AT5G55940;AT5G55950;AT5G55960;AT5G55970;AT5G55980;AT5G55990;AT5G56000;AT5G56010;AT5G56020;AT5G56030;AT5G56040;AT5G56050;AT5G56060;AT5G56070;AT5G56075;AT5G56080;AT5G56090;AT5G56100;AT5G56110;AT5G56120;AT5G56130;AT5G56140;AT5G56150;AT5G56160;AT5G56170;AT5G56180;AT5G56190;AT5G56200;AT5G56210;AT5G56220;AT5G56230;AT5G56240;AT5G56250;AT5G56260;AT5G56270;AT5G56280;AT5G56290;AT5G56300;AT5G56310;AT5G56320…
ONT.8554.2	AT3G11920;AT3G11930;AT3G11940;AT3G11945;AT3G11950;AT3G11960;AT3G11964;AT3G11980;AT3G11990;AT3G12000;AT3G12010;AT3G12020;AT3G12030;AT3G12040;AT3G12050;AT3G12060;AT3G12070;AT3G12080;AT3G12090;AT3G12100;AT3G12110;AT3G12120;AT3G12130;AT3G12140;AT3G12145;AT3G12150;AT3G12160;AT3G12170;AT3G12180;AT3G12190;AT3G12200;AT3G12203;AT3G12210;AT3G12220;AT3G12230;AT3G12240;AT3G12250;AT3G12260;AT3G12270;AT3G12280…
ONT.7457.14	AT2G32430;AT2G32440;AT2G32450;AT2G32460;AT2G32470;AT2G32480;AT2G32487;AT2G32500;AT2G32510;AT2G32520;AT2G32530;AT2G32540;AT2G32550;AT2G32560;AT2G32580;AT2G32590;AT2G32600;AT2G32610;AT2G32620;AT2G32630;AT2G32640;AT2G32645;AT2G32650;AT2G32660;AT2G32670;AT2G32680;AT2G32700;AT2G32710;AT2G32720;AT2G32730;AT2G32740;AT2G32750;AT2G32760;AT2G32765;AT2G32770;AT2G32780;AT2G32785;AT2G32788;AT2G32790;AT2G32800…
ONT.13646.2	AT4G06676;AT4G06688
ONT.10261.1	AT3G06019;AT3G06020;AT3G06030;AT3G06035;AT3G06040;AT3G06050;AT3G06060;AT3G06070;AT3G06080;AT3G06090;AT3G06100;AT3G06110;AT3G06120;AT3G06130;AT3G06140;AT3G06142;AT3G06145;AT3G06150;AT3G06160;AT3G06170;AT3G06180;AT3G06190;AT3G06200;AT3G06210;AT3G06220;AT3G06230;AT3G06240;AT3G06250;AT3G06260;AT3G06270;AT3G06280;AT3G06290;AT3G06300;AT3G06310;AT3G06320;AT3G06330;AT3G06340;AT3G06350;AT3G06360;AT3G06370…
ONT.4293.8	AT1G58340;AT1G58350;AT1G58360;AT1G58370;AT1G58380;AT1G58390;AT1G58400;AT1G58410;AT1G58420;AT1G58430;AT1G58440;AT1G58450;AT1G58460;AT1G58470;AT1G58520;AT1G58602;AT1G58643;AT1G58684;AT1G58725;AT1G58766;AT1G58807;AT1G58848;AT1G58936;AT1G58983;AT1G59030;AT1G59077;AT1G59124;AT1G59171;AT1G59218;AT1G59312;AT1G59359
ONT.4548.1	AT1G66510;AT1G66520;AT1G66530;AT1G66540;AT1G66550;AT1G66553;AT1G66560;AT1G66570;AT1G66580;AT1G66590;AT1G66600;AT1G66610;AT1G66620;AT1G66630;AT1G66640;AT1G66650;AT1G66660;AT1G66670;AT1G66680;AT1G66690;AT1G66700;AT1G66720;AT1G66730;AT1G66740;AT1G66750;AT1G66760;AT1G66770;AT1G66780;AT1G66790;AT1G66800;AT1G66810;AT1G66820;AT1G66830;AT1G66840;AT1G66850;AT1G66852;AT1G66855;AT1G66860;AT1G66870;AT1G66880…
ONT.12195.5	AT4G07515;AT4G07524;AT4G07526
ONT.18975.2	AT5G55620;AT5G55630;AT5G55640;AT5G55650;AT5G55660;AT5G55670;AT5G55680;AT5G55690;AT5G55700;AT5G55710;AT5G55720;AT5G55730;AT5G55740;AT5G55750;AT5G55760;AT5G55770;AT5G55780;AT5G55790;AT5G55800;AT5G55810;AT5G55820;AT5G55830;AT5G55840;AT5G55850;AT5G55855;AT5G55856;AT5G55860;AT5G55870;AT5G55880;AT5G55890;AT5G55893;AT5G55900;AT5G55910;AT5G55920;AT5G55930;AT5G55940;AT5G55950;AT5G55960;AT5G55970;AT5G55980…
ONT.6104.3	AT2G35890;AT2G35900;AT2G35910;AT2G35920;AT2G35930;AT2G35940;AT2G35950;AT2G35960;AT2G35970;AT2G35980;AT2G35990;AT2G36000;AT2G36010;AT2G36020;AT2G36026;AT2G36030;AT2G36050;AT2G36053;AT2G36060;AT2G36070;AT2G36080;AT2G36090;AT2G36100;AT2G36110;AT2G36130;AT2G36145;AT2G36160;AT2G36170;AT2G36180;AT2G36190;AT2G36200;AT2G36210;AT2G36220;AT2G36230;AT2G36240;AT2G36250;AT2G36255;AT2G36260;AT2G36261;AT2G36270…
ONT.11365.2	AT3G47910;AT3G47920;AT3G47930;AT3G47940;AT3G47950;AT3G47960;AT3G47965;AT3G47980;AT3G47990;AT3G48000;AT3G48010;AT3G48020;AT3G48030;AT3G48040;AT3G48050;AT3G48060;AT3G48070;AT3G48080;AT3G48090;AT3G48100;AT3G48110;AT3G48131;AT3G48140;AT3G48150;AT3G48160;AT3G48170;AT3G48180;AT3G48185;AT3G48190;AT3G48195;AT3G48200;AT3G48205;AT3G48208;AT3G48209;AT3G48210;AT3G48220;AT3G48230;AT3G48231;AT3G48237;AT3G48240…
ONT.6921.4	AT2G18160;AT2G18170;AT2G18180;AT2G18190;AT2G18193;AT2G18196;AT2G18200;AT2G18210;AT2G18220;AT2G18230;AT2G18240;AT2G18245;AT2G18250;AT2G18260;AT2G18270;AT2G18280;AT2G18290;AT2G18300;AT2G18320;AT2G18328;AT2G18330;AT2G18340;AT2G18350;AT2G18360;AT2G18370;AT2G18380;AT2G18390;AT2G18400;AT2G18410;AT2G18420;AT2G18450;AT2G18460;AT2G18465;AT2G18470;AT2G18480;AT2G18490;AT2G18500;AT2G18510;AT2G18520;AT2G18530…
ONT.12195.4	AT4G07515;AT4G07524;AT4G07526
ONT.6476.1	AT2G44800;AT2G44810;AT2G44820;AT2G44830;AT2G44840;AT2G44850;AT2G44860;AT2G44870;AT2G44880;AT2G44890;AT2G44900;AT2G44910;AT2G44920;AT2G44925;AT2G44930;AT2G44940;AT2G44950;AT2G44970;AT2G44980;AT2G44990;AT2G45000;AT2G45010;AT2G45030;AT2G45040;AT2G45050;AT2G45060;AT2G45070;AT2G45080;AT2G45100;AT2G45110;AT2G45120;AT2G45126;AT2G45130;AT2G45135;AT2G45140;AT2G45150;AT2G45160;AT2G45161;AT2G45170;AT2G45180…
ONT.5292.1	AT2G06925;AT2G06960;AT2G06983;AT2G06990;AT2G07000;AT2G07020;AT2G07040;AT2G07050;AT2G07110;AT2G07120;AT2G07140;AT2G07170;AT2G07180;AT2G07190;AT2G07200;AT2G07215;AT2G07240;ONT.5294;ONT.6777;ONT.6778
ONT.6104.53	AT2G35890;AT2G35900;AT2G35910;AT2G35920;AT2G35930;AT2G35940;AT2G35950;AT2G35960;AT2G35970;AT2G35980;AT2G35990;AT2G36000;AT2G36010;AT2G36020;AT2G36026;AT2G36030;AT2G36050;AT2G36053;AT2G36060;AT2G36070;AT2G36080;AT2G36090;AT2G36100;AT2G36110;AT2G36130;AT2G36145;AT2G36160;AT2G36170;AT2G36180;AT2G36190;AT2G36200;AT2G36210;AT2G36220;AT2G36230;AT2G36240;AT2G36250;AT2G36255;AT2G36260;AT2G36261;AT2G36270…
ONT.8771.12	AT1G23040;AT1G31810;AT1G48620;AT1G54215;AT2G14890;AT2G25050;AT2G28671;AT3G05470;AT3G05920;AT3G16800;AT3G16810;AT3G16820;AT3G16830;AT3G16840;AT3G16850;AT3G16851;AT3G16857;AT3G16860;AT3G16870;AT3G16880;AT3G16890;AT3G16895;AT3G16900;AT3G16910;AT3G16920;AT3G16930;AT3G16940;AT3G16950;AT3G16960;AT3G16970;AT3G16980;AT3G16990;AT3G17000;AT3G17010;AT3G17020;AT3G17030;AT3G17040;AT3G17060;AT3G17070;AT3G17080…
ONT.10823.3	AT3G19410;AT3G19420;AT3G19430;AT3G19440;AT3G19450;AT3G19460;AT3G19470;AT3G19480;AT3G19490;AT3G19500;AT3G19508;AT3G19510;AT3G19515;AT3G19520;AT3G19530;AT3G19540;AT3G19550;AT3G19553;AT3G19560;AT3G19570;AT3G19580;AT3G19590;AT3G19595;AT3G19600;AT3G19610;AT3G19615;AT3G19620;AT3G19630;AT3G19640;AT3G19650;AT3G19663;AT3G19670;AT3G19680;AT3G19690;AT3G19700;AT3G19710;AT3G19720;AT3G19740;AT3G19760;AT3G19770…
ONT.10313.4	AT3G07030;AT3G07040;AT3G07050;AT3G07060;AT3G07070;AT3G07080;AT3G07090;AT3G07100;AT3G07110;AT3G07120;AT3G07130;AT3G07140;AT3G07150;AT3G07160;AT3G07170;AT3G07180;AT3G07190;AT3G07195;AT3G07200;AT3G07210;AT3G07220;AT3G07230;AT3G07250;AT3G07260;AT3G07270;AT3G07290;AT3G07300;AT3G07310;AT3G07320;AT3G07330;AT3G07340;AT3G07350;AT3G07360;AT3G07370;AT3G07380;AT3G07390;AT3G07400;AT3G07410;AT3G07420;AT3G07425…
ONT.3838.2	AT1G33400;AT1G33410;AT1G33420;AT1G33430;AT1G33440;AT1G33470;AT1G33475;AT1G33480;AT1G33490;AT1G33500;AT1G33520;AT1G33530;AT1G33540;AT1G33560;AT1G33590;AT1G33600;AT1G33607;AT1G33610;AT1G33612;AT1G33640;AT1G33670;AT1G33680;AT1G33700;AT1G33709;AT1G33710;AT1G33720;AT1G33730;AT1G33750;AT1G33760;AT1G33770;AT1G33780;AT1G33790;AT1G33800;AT1G33810;AT1G33811;AT1G33820;AT1G33830;AT1G33840;AT1G33850;AT1G33860…
ONT.2770.37	AT1G04890;AT1G04900;AT1G04910;AT1G04920;AT1G04930;AT1G04940;AT1G04945;AT1G04950;AT1G04960;AT1G04970;AT1G04980;AT1G04985;AT1G04990;AT1G05000;AT1G05010;AT1G05020;AT1G05030;AT1G05040;AT1G05055;AT1G05060;AT1G05065;AT1G05070;AT1G05080;AT1G05085;AT1G05090;AT1G05100;AT1G05120;AT1G05136;AT1G05140;AT1G05150;AT1G05160;AT1G05170;AT1G05180;AT1G05190;AT1G05200;AT1G05205;AT1G05210;AT1G05220;AT1G05230;AT1G05240…
ONT.2770.33	AT1G04890;AT1G04900;AT1G04910;AT1G04920;AT1G04930;AT1G04940;AT1G04945;AT1G04950;AT1G04960;AT1G04970;AT1G04980;AT1G04985;AT1G04990;AT1G05000;AT1G05010;AT1G05020;AT1G05030;AT1G05040;AT1G05055;AT1G05060;AT1G05065;AT1G05070;AT1G05080;AT1G05085;AT1G05090;AT1G05100;AT1G05120;AT1G05136;AT1G05140;AT1G05150;AT1G05160;AT1G05170;AT1G05180;AT1G05190;AT1G05200;AT1G05205;AT1G05210;AT1G05220;AT1G05230;AT1G05240…
ONT.4903.1	AT1G75680;AT1G75690;AT1G75700;AT1G75710;AT1G75717;AT1G75720;AT1G75730;AT1G75750;AT1G75760;AT1G75770;AT1G75780;AT1G75790;AT1G75800;AT1G75810;AT1G75820;AT1G75830;AT1G75840;AT1G75850;AT1G75860;AT1G75870;AT1G75880;AT1G75890;AT1G75900;AT1G75910;AT1G75920;AT1G75930;AT1G75940;AT1G75950;AT1G75960;AT1G75980;AT1G75990;AT1G76010;AT1G76020;AT1G76030;AT1G76040;AT1G76050;AT1G76060;AT1G76065;AT1G76070;AT1G76080…
ONT.2770.24	AT1G04890;AT1G04900;AT1G04910;AT1G04920;AT1G04930;AT1G04940;AT1G04945;AT1G04950;AT1G04960;AT1G04970;AT1G04980;AT1G04985;AT1G04990;AT1G05000;AT1G05010;AT1G05020;AT1G05030;AT1G05040;AT1G05055;AT1G05060;AT1G05065;AT1G05070;AT1G05080;AT1G05085;AT1G05090;AT1G05100;AT1G05120;AT1G05136;AT1G05140;AT1G05150;AT1G05160;AT1G05170;AT1G05180;AT1G05190;AT1G05200;AT1G05205;AT1G05210;AT1G05220;AT1G05230;AT1G05240…
ONT.8320.3	AT3G05858;AT3G05860;AT3G05870;AT3G05880;AT3G05890;AT3G05900;AT3G05910;AT3G05920;AT3G05930;AT3G05935;AT3G05936;AT3G05937;AT3G05940;AT3G05950;AT3G05960;AT3G05970;AT3G05975;AT3G05980;AT3G05990;AT3G06000;AT3G06010;AT3G06019;AT3G06020;AT3G06030;AT3G06035;AT3G06040;AT3G06050;AT3G06060;AT3G06070;AT3G06080;AT3G06090;AT3G06100;AT3G06110;AT3G06120;AT3G06130;AT3G06140;AT3G06142;AT3G06145;AT3G06150;AT3G06160…
ONT.6104.32	AT2G35890;AT2G35900;AT2G35910;AT2G35920;AT2G35930;AT2G35940;AT2G35950;AT2G35960;AT2G35970;AT2G35980;AT2G35990;AT2G36000;AT2G36010;AT2G36020;AT2G36026;AT2G36030;AT2G36050;AT2G36053;AT2G36060;AT2G36070;AT2G36080;AT2G36090;AT2G36100;AT2G36110;AT2G36130;AT2G36145;AT2G36160;AT2G36170;AT2G36180;AT2G36190;AT2G36200;AT2G36210;AT2G36220;AT2G36230;AT2G36240;AT2G36250;AT2G36255;AT2G36260;AT2G36261;AT2G36270…
ONT.6921.5	AT2G18160;AT2G18170;AT2G18180;AT2G18190;AT2G18193;AT2G18196;AT2G18200;AT2G18210;AT2G18220;AT2G18230;AT2G18240;AT2G18245;AT2G18250;AT2G18260;AT2G18270;AT2G18280;AT2G18290;AT2G18300;AT2G18320;AT2G18328;AT2G18330;AT2G18340;AT2G18350;AT2G18360;AT2G18370;AT2G18380;AT2G18390;AT2G18400;AT2G18410;AT2G18420;AT2G18450;AT2G18460;AT2G18465;AT2G18470;AT2G18480;AT2G18490;AT2G18500;AT2G18510;AT2G18520;AT2G18530…
ONT.4956.1	AT1G01073;AT1G76820;AT1G76830;AT1G76840;AT1G76850;AT1G76860;AT1G76870;AT1G76880;AT1G76890;AT1G76900;AT1G76910;AT1G76920;AT1G76930;AT1G76940;AT1G76950;AT1G76952;AT1G76954;AT1G76955;AT1G76960;AT1G76965;AT1G76970;AT1G76980;AT1G76994;AT1G77000;AT1G77010;AT1G77020;AT1G77030;AT1G77060;AT1G77080;AT1G77090;AT1G77093;AT1G77100;AT1G77110;AT1G77120;AT1G77122;AT1G77130;AT1G77140;AT1G77145;AT1G77150;AT1G77160…
ONT.10823.2	AT3G19410;AT3G19420;AT3G19430;AT3G19440;AT3G19450;AT3G19460;AT3G19470;AT3G19480;AT3G19490;AT3G19500;AT3G19508;AT3G19510;AT3G19515;AT3G19520;AT3G19530;AT3G19540;AT3G19550;AT3G19553;AT3G19560;AT3G19570;AT3G19580;AT3G19590;AT3G19595;AT3G19600;AT3G19610;AT3G19615;AT3G19620;AT3G19630;AT3G19640;AT3G19650;AT3G19663;AT3G19670;AT3G19680;AT3G19690;AT3G19700;AT3G19710;AT3G19720;AT3G19740;AT3G19760;AT3G19770…
ONT.9647.3	AT3G53310;AT3G53320;AT3G53330;AT3G53340;AT3G53342;AT3G53350;AT3G53360;AT3G53370;AT3G53380;AT3G53390;AT3G53400;AT3G53410;AT3G53420;AT3G53430;AT3G53440;AT3G53450;AT3G53460;AT3G53470;AT3G53480;AT3G53490;AT3G53500;AT3G53510;AT3G53520;AT3G53530;AT3G53540;AT3G53550;AT3G53560;AT3G53570;AT3G53590;AT3G53600;AT3G53610;AT3G53611;AT3G53620;AT3G53630;AT3G53640;AT3G53650;AT3G53668;AT3G53670;AT3G53680;AT3G53690…
ONT.8771.7	AT2G25050;AT2G28671;AT3G05920;AT3G16800;AT3G16810;AT3G16820;AT3G16830;AT3G16840;AT3G16850;AT3G16851;AT3G16857;AT3G16860;AT3G16870;AT3G16880;AT3G16890;AT3G16895;AT3G16900;AT3G16910;AT3G16920;AT3G16930;AT3G16940;AT3G16950;AT3G16960;AT3G16970;AT3G16980;AT3G16990;AT3G17000;AT3G17010;AT3G17020;AT3G17030;AT3G17040;AT3G17060;AT3G17070;AT3G17080;AT3G17090;AT3G17100;AT3G17120;AT3G17130;AT3G17140;AT3G17150…
ONT.9163.2	AT3G26460;AT3G26470;AT3G26480;AT3G26490;AT3G26500;AT3G26510;AT3G26511;AT3G26520;AT3G26539;AT3G26540;AT3G26550;AT3G26560;AT3G26561;AT3G26570;AT3G26580;AT3G26590;AT3G26600;AT3G26610;AT3G26616;AT3G26618;AT3G26620;AT3G26630;AT3G26640;AT3G26650;AT3G26660;AT3G26670;AT3G26680;AT3G26690;AT3G26700;AT3G26710;AT3G26720;AT3G26730;AT3G26740;AT3G26742;AT3G26744;AT3G26750;AT3G26760;AT3G26770;AT3G26780;AT3G26782…
ONT.4746.1	AT1G71695;AT1G71696;AT1G71697;AT1G71710;AT1G71720;AT1G71730;AT1G71740;AT1G71750;AT1G71760;AT1G71770;AT1G71780;AT1G71790;AT1G71800;AT1G71810;AT1G71820;AT1G71830;AT1G71840;AT1G71850;AT1G71860;AT1G71865;AT1G71866;AT1G71870;AT1G71880;AT1G71890;AT1G71900;AT1G71910;AT1G71920;AT1G71930;AT1G71940;AT1G71950;AT1G71960;AT1G71970;AT1G71980;AT1G71990;AT1G72000;AT1G72010;AT1G72020;AT1G72030;AT1G72040;AT1G72050…
ONT.2770.11	AT1G04890;AT1G04900;AT1G04910;AT1G04920;AT1G04930;AT1G04940;AT1G04945;AT1G04950;AT1G04960;AT1G04970;AT1G04980;AT1G04985;AT1G04990;AT1G05000;AT1G05010;AT1G05020;AT1G05030;AT1G05040;AT1G05055;AT1G05060;AT1G05065;AT1G05070;AT1G05080;AT1G05085;AT1G05090;AT1G05100;AT1G05120;AT1G05136;AT1G05140;AT1G05150;AT1G05160;AT1G05170;AT1G05180;AT1G05190;AT1G05200;AT1G05205;AT1G05210;AT1G05220;AT1G05230;AT1G05240…
ONT.7257.1	AT2G27200;AT2G27210;AT2G27220;AT2G27228;AT2G27229;AT2G27240;AT2G27250;AT2G27260;AT2G27270;AT2G27280;AT2G27285;AT2G27290;AT2G27300;AT2G27310;AT2G27315;AT2G27320;AT2G27330;AT2G27340;AT2G27350;AT2G27360;AT2G27370;AT2G27380;AT2G27385;AT2G27389;AT2G27390;AT2G27402;AT2G27410;AT2G27420;AT2G27430;AT2G27450;AT2G27460;AT2G27470;AT2G27480;AT2G27490;AT2G27500;AT2G27505;AT2G27510;AT2G27520;AT2G27530;AT2G27535…
ONT.7457.7	AT2G32430;AT2G32440;AT2G32450;AT2G32460;AT2G32470;AT2G32480;AT2G32487;AT2G32500;AT2G32510;AT2G32520;AT2G32530;AT2G32540;AT2G32550;AT2G32560;AT2G32580;AT2G32590;AT2G32600;AT2G32610;AT2G32620;AT2G32630;AT2G32640;AT2G32645;AT2G32650;AT2G32660;AT2G32670;AT2G32680;AT2G32700;AT2G32710;AT2G32720;AT2G32730;AT2G32740;AT2G32750;AT2G32760;AT2G32765;AT2G32770;AT2G32780;AT2G32785;AT2G32788;AT2G32790;AT2G32800…
ONT.272.8	AT1G07630;AT1G07640;AT1G07645;AT1G07650;AT1G07660;AT1G07670;AT1G07680;AT1G07690;AT1G07700;AT1G07705;AT1G07710;AT1G07720;AT1G07725;AT1G07730;AT1G07740;AT1G07745;AT1G07747;AT1G07750;AT1G07770;AT1G07780;AT1G07790;AT1G07795;AT1G07810;AT1G07820;AT1G07830;AT1G07840;AT1G07850;AT1G07860;AT1G07870;AT1G07880;AT1G07885;AT1G07890;AT1G07900;AT1G07901;AT1G07910;AT1G07930;AT1G07940;AT1G07950;AT1G07960;AT1G07970…
ONT.2770.36	AT1G04890;AT1G04900;AT1G04910;AT1G04920;AT1G04930;AT1G04940;AT1G04945;AT1G04950;AT1G04960;AT1G04970;AT1G04980;AT1G04985;AT1G04990;AT1G05000;AT1G05010;AT1G05020;AT1G05030;AT1G05040;AT1G05055;AT1G05060;AT1G05065;AT1G05070;AT1G05080;AT1G05085;AT1G05090;AT1G05100;AT1G05120;AT1G05136;AT1G05140;AT1G05150;AT1G05160;AT1G05170;AT1G05180;AT1G05190;AT1G05200;AT1G05205;AT1G05210;AT1G05220;AT1G05230;AT1G05240…
ONT.4076.1	AT1G51538;AT1G51540;AT1G51550;AT1G51560;AT1G51570;AT1G51580;AT1G51590;AT1G51600;AT1G51610;AT1G51620;AT1G51630;AT1G51640;AT1G51650;AT1G51660;AT1G51670;AT1G51680;AT1G51690;AT1G51700;AT1G51710;AT1G51720;AT1G51730;AT1G51740;AT1G51745;AT1G51760;AT1G51770;AT1G51780;AT1G51800;AT1G51805;AT1G51810;AT1G51820;AT1G51823;AT1G51830;AT1G51840;AT1G51850;AT1G51860;AT1G51870;AT1G51880;AT1G51890;AT1G51900;AT1G51910…
ONT.4471.2	AT1G64310;AT1G64320;AT1G64330;AT1G64340;AT1G64350;AT1G64355;AT1G64360;AT1G64370;AT1G64380;AT1G64385;AT1G64390;AT1G64400;AT1G64405;AT1G64430;AT1G64440;AT1G64450;AT1G64460;AT1G64470;AT1G64480;AT1G64490;AT1G64500;AT1G64510;AT1G64520;AT1G64530;AT1G64540;AT1G64550;AT1G64561;AT1G64570;AT1G64580;AT1G64583;AT1G64585;AT1G64590;AT1G64600;AT1G64610;AT1G64620;AT1G64625;AT1G64628;AT1G64640;AT1G64650;AT1G64660…
ONT.11284.1	AT3G45860;AT3G45870;AT3G45880;AT3G45890;AT3G45900;AT3G45910;AT3G45920;AT3G45930;AT3G45940;AT3G45950;AT3G45960;AT3G45970;AT3G45980;AT3G45990;AT3G46000;AT3G46010;AT3G46020;AT3G46030;AT3G46040;AT3G46050;AT3G46060;AT3G46070;AT3G46080;AT3G46086;AT3G46090;AT3G46100;AT3G46110;AT3G46120;AT3G46130;AT3G46140;AT3G46150;AT3G46160;AT3G46170;AT3G46180;AT3G46190;AT3G46200;AT3G46206;AT3G46210;AT3G46220;AT3G46230…
ONT.1480.2	AT1G49580;AT1G49590;AT1G49600;AT1G49610;AT1G49620;AT1G49630;AT1G49640;AT1G49650;AT1G49660;AT1G49670;AT1G49680;AT1G49700;AT1G49710;AT1G49715;AT1G49720;AT1G49730;AT1G49740;AT1G49750;AT1G49760;AT1G49770;AT1G49780;AT1G49790;AT1G49800;AT1G49810;AT1G49820;AT1G49830;AT1G49840;AT1G49850;AT1G49860;AT1G49870;AT1G49880;AT1G49890;AT1G49900;AT1G49910;AT1G49920;AT1G49930;AT1G49938;AT1G49940;AT1G49950;AT1G49960…
ONT.8554.1	AT3G11920;AT3G11930;AT3G11940;AT3G11945;AT3G11950;AT3G11960;AT3G11964;AT3G11980;AT3G11990;AT3G12000;AT3G12010;AT3G12020;AT3G12030;AT3G12040;AT3G12050;AT3G12060;AT3G12070;AT3G12080;AT3G12090;AT3G12100;AT3G12110;AT3G12120;AT3G12130;AT3G12140;AT3G12145;AT3G12150;AT3G12160;AT3G12170;AT3G12180;AT3G12190;AT3G12200;AT3G12203;AT3G12210;AT3G12220;AT3G12230;AT3G12240;AT3G12250;AT3G12260;AT3G12270;AT3G12280…
ONT.2770.28	AT1G04890;AT1G04900;AT1G04910;AT1G04920;AT1G04930;AT1G04940;AT1G04945;AT1G04950;AT1G04960;AT1G04970;AT1G04980;AT1G04985;AT1G04990;AT1G05000;AT1G05010;AT1G05020;AT1G05030;AT1G05040;AT1G05055;AT1G05060;AT1G05065;AT1G05070;AT1G05080;AT1G05085;AT1G05090;AT1G05100;AT1G05120;AT1G05136;AT1G05140;AT1G05150;AT1G05160;AT1G05170;AT1G05180;AT1G05190;AT1G05200;AT1G05205;AT1G05210;AT1G05220;AT1G05230;AT1G05240…
ONT.5043.1	AT1G78850;AT1G78860;AT1G78870;AT1G78880;AT1G78890;AT1G78895;AT1G78900;AT1G78910;AT1G78915;AT1G78920;AT1G78922;AT1G78930;AT1G78940;AT1G78950;AT1G78955;AT1G78960;AT1G78970;AT1G78980;AT1G78990;AT1G78995;AT1G79000;AT1G79010;AT1G79020;AT1G79030;AT1G79040;AT1G79050;AT1G79060;AT1G79070;AT1G79080;AT1G79090;AT1G79100;AT1G79110;AT1G79120;AT1G79130;AT1G79150;AT1G79160;AT1G79170;AT1G79180;AT1G79190;AT1G79200…
ONT.9163.1	AT3G26460;AT3G26470;AT3G26480;AT3G26490;AT3G26500;AT3G26510;AT3G26511;AT3G26520;AT3G26539;AT3G26540;AT3G26550;AT3G26560;AT3G26561;AT3G26570;AT3G26580;AT3G26590;AT3G26600;AT3G26610;AT3G26616;AT3G26618;AT3G26620;AT3G26630;AT3G26640;AT3G26650;AT3G26660;AT3G26670;AT3G26680;AT3G26690;AT3G26700;AT3G26710;AT3G26720;AT3G26730;AT3G26740;AT3G26742;AT3G26744;AT3G26750;AT3G26760;AT3G26770;AT3G26780;AT3G26782…
ONT.2108.4	AT1G69010;AT1G69020;AT1G69030;AT1G69040;AT1G69050;AT1G69060;AT1G69070;AT1G69080;AT1G69090;AT1G69100;AT1G69120;AT1G69150;AT1G69160;AT1G69170;AT1G69180;AT1G69190;AT1G69200;AT1G69210;AT1G69220;AT1G69230;AT1G69240;AT1G69250;AT1G69260;AT1G69270;AT1G69280;AT1G69290;AT1G69295;AT1G69310;AT1G69320;AT1G69325;AT1G69330;AT1G69340;AT1G69350;AT1G69360;AT1G69370;AT1G69380;AT1G69390;AT1G69400;AT1G69410;AT1G69420…
ONT.4216.1	AT1G55450;AT1G55460;AT1G55475;AT1G55480;AT1G55490;AT1G55500;AT1G55510;AT1G55520;AT1G55530;AT1G55535;AT1G55540;AT1G55546;AT1G55550;AT1G55560;AT1G55570;AT1G55580;AT1G55590;AT1G55600;AT1G55610;AT1G55615;AT1G55620;AT1G55630;AT1G55640;AT1G55650;AT1G55660;AT1G55670;AT1G55680;AT1G55690;AT1G55700;AT1G55710;AT1G55720;AT1G55730;AT1G55740;AT1G55750;AT1G55760;AT1G55770;AT1G55790;AT1G55800;AT1G55805;AT1G55810…
ONT.7457.45	AT2G32430;AT2G32440;AT2G32450;AT2G32460;AT2G32470;AT2G32480;AT2G32487;AT2G32500;AT2G32510;AT2G32520;AT2G32530;AT2G32540;AT2G32550;AT2G32560;AT2G32580;AT2G32590;AT2G32600;AT2G32610;AT2G32620;AT2G32630;AT2G32640;AT2G32645;AT2G32650;AT2G32660;AT2G32670;AT2G32680;AT2G32700;AT2G32710;AT2G32720;AT2G32730;AT2G32740;AT2G32750;AT2G32760;AT2G32765;AT2G32770;AT2G32780;AT2G32785;AT2G32788;AT2G32790;AT2G32800…
ONT.18324.2	AT1G75550;AT5G36739;AT5G36740;AT5G36770;AT5G36780;AT5G36790;AT5G36800;AT5G36805;AT5G36810;AT5G36820;AT5G36870;AT5G36880;AT5G36890;AT5G36900;AT5G36910;AT5G36920;AT5G36925;AT5G36930;AT5G36940;AT5G36950;AT5G36960;AT5G36970;AT5G36980;AT5G37000;AT5G37010;AT5G37020;AT5G37030;AT5G37040;AT5G37050;AT5G37055;AT5G37060
ONT.15981.3	AT5G28530;AT5G28540;AT5G28550;AT5G28560;AT5G28590;AT5G28610;AT5G28615;AT5G28620;AT5G28630;AT5G28640;AT5G28642;AT5G28646;AT5G28650;AT5G28660;ONT.15982
ONT.16234.2	AT5G42400;AT5G42405;AT5G42410;AT5G42420;AT5G42430;AT5G42440;AT5G42450;AT5G42460;AT5G42470;AT5G42480;AT5G42490;AT5G42500;AT5G42504;AT5G42510;AT5G42520;AT5G42530;AT5G42540;AT5G42560;AT5G42567;AT5G42570;AT5G42580;AT5G42590;AT5G42591;AT5G42600;AT5G42610;AT5G42620;AT5G42630;AT5G42635;AT5G42640;AT5G42650;AT5G42655;AT5G42660;AT5G42670;AT5G42680;AT5G42690;AT5G42700;AT5G42710;AT5G42720;AT5G42740;AT5G42750…
ONT.9379.1	AT3G46450;AT3G46460;AT3G46470;AT3G46480;AT3G46490;AT3G46500;AT3G46510;AT3G46520;AT3G46530;AT3G46540;AT3G46550;AT3G46560;AT3G46570;AT3G46580;AT3G46590;AT3G46600;AT3G46610;AT3G46613;AT3G46616;AT3G46620;AT3G46630;AT3G46640;AT3G46650;AT3G46660;AT3G46666;AT3G46680;AT3G46690;AT3G46700;AT3G46710;AT3G46720;AT3G46730;AT3G46740;AT3G46750;AT3G46760;AT3G46770;AT3G46780;AT3G46790;AT3G46800;AT3G46810;AT3G46820…
ONT.4258.2	AT1G56410;AT1G56415;AT1G56418;AT1G56420;AT1G56423;AT1G56430;AT1G56440;AT1G56450;AT1G56460;AT1G56500;AT1G56510;AT1G56520;AT1G56530;AT1G56540;AT1G56550;AT1G56553;AT1G56555;AT1G56560;AT1G56570;AT1G56580;AT1G56590;AT1G56600;AT1G56610;AT1G56620;AT1G56630;AT1G56650;AT1G56660;AT1G56670;AT1G56680;AT1G56690;AT1G56700;AT1G56710;AT1G56720;AT1G57540;AT1G57550;ONT.1727
ONT.14776.3	AT4G36370;AT4G36380;AT4G36390;AT4G36400;AT4G36410;AT4G36420;AT4G36430;AT4G36440;AT4G36450;AT4G36460;AT4G36470;AT4G36480;AT4G36490;AT4G36500;AT4G36510;AT4G36515;AT4G36520;AT4G36530;AT4G36540;AT4G36550;AT4G36560;AT4G36570;AT4G36580;AT4G36590;AT4G36600;AT4G36610;AT4G36620;AT4G36630;AT4G36640;AT4G36650;AT4G36660;AT4G36670;AT4G36680;AT4G36690;AT4G36700;AT4G36710;AT4G36720;AT4G36730;AT4G36740;AT4G36750…
ONT.12198.2	AT4G07940;AT4G07950;AT4G07960;AT4G07965;AT4G07990;AT4G08025;AT4G08028;AT4G08039;AT4G08040;AT4G08073
ONT.5319.2	AT2G13440;AT2G13450;AT2G13463;AT2G13500;AT2G13510;AT2G13540;AT2G13542;AT2G13547;AT2G13550;AT2G13560;AT2G13570;AT2G13600;AT2G13610;AT2G13620;AT2G13623;AT2G13630;AT2G13640;AT2G13650;AT2G13660;AT2G13680;AT2G13690;AT2G13720;AT2G13760;AT2G13770;AT2G13790;AT2G13800;AT2G13810;AT2G13820;AT2G13840;AT5G64541;ONT.5316
ONT.2770.41	AT1G04890;AT1G04900;AT1G04910;AT1G04920;AT1G04930;AT1G04940;AT1G04945;AT1G04950;AT1G04960;AT1G04970;AT1G04980;AT1G04985;AT1G04990;AT1G05000;AT1G05010;AT1G05020;AT1G05030;AT1G05040;AT1G05055;AT1G05060;AT1G05065;AT1G05070;AT1G05080;AT1G05085;AT1G05090;AT1G05100;AT1G05120;AT1G05136;AT1G05140;AT1G05150;AT1G05160;AT1G05170;AT1G05180;AT1G05190;AT1G05200;AT1G05205;AT1G05210;AT1G05220;AT1G05230;AT1G05240…
ONT.14871.5	AT4G38390;AT4G38400;AT4G38401;AT4G38405;AT4G38410;AT4G38420;AT4G38430;AT4G38440;AT4G38460;AT4G38470;AT4G38480;AT4G38490;AT4G38495;AT4G38500;AT4G38510;AT4G38520;AT4G38530;AT4G38540;AT4G38550;AT4G38560;AT4G38570;AT4G38580;AT4G38590;AT4G38600;AT4G38620;AT4G38630;AT4G38640;AT4G38650;AT4G38660;AT4G38670;AT4G38690;AT4G38700;AT4G38710;AT4G38730;AT4G38740;AT4G38760;AT4G38770;AT4G38780;AT4G38781;AT4G38790…
ONT.10312.4	AT3G06970;AT3G06980;AT3G06985;AT3G06990;AT3G07000;AT3G07005;AT3G07010;AT3G07020;AT3G07030;AT3G07040;AT3G07050;AT3G07060;AT3G07070;AT3G07080;AT3G07090;AT3G07100;AT3G07110;AT3G07120;AT3G07130;AT3G07140;AT3G07150;AT3G07160;AT3G07170;AT3G07180;AT3G07190;AT3G07195;AT3G07200;AT3G07210;AT3G07220;AT3G07230;AT3G07250;AT3G07260;AT3G07270;AT3G07273;AT3G07290;AT3G07300;AT3G07310;AT3G07320;AT3G07330;AT3G07340…
ONT.11189.1	AT3G30805;AT3G30820;AT3G30840;AT3G30841;AT3G30842;AT3G30845;AT3G30849
ONT.6104.55	AT2G35890;AT2G35900;AT2G35910;AT2G35920;AT2G35930;AT2G35940;AT2G35950;AT2G35960;AT2G35970;AT2G35980;AT2G35990;AT2G36000;AT2G36010;AT2G36020;AT2G36026;AT2G36030;AT2G36050;AT2G36053;AT2G36060;AT2G36070;AT2G36080;AT2G36090;AT2G36100;AT2G36110;AT2G36130;AT2G36145;AT2G36160;AT2G36170;AT2G36180;AT2G36190;AT2G36200;AT2G36210;AT2G36220;AT2G36230;AT2G36240;AT2G36250;AT2G36255;AT2G36260;AT2G36261;AT2G36270…
ONT.8005.1	AT2G45360;AT2G45380;AT2G45400;AT2G45403;AT2G45406;AT2G45410;AT2G45412;AT2G45420;AT2G45430;AT2G45434;AT2G45440;AT2G45450;AT2G45460;AT2G45470;AT2G45480;AT2G45490;AT2G45500;AT2G45510;AT2G45520;AT2G45530;AT2G45540;AT2G45550;AT2G45560;AT2G45570;AT2G45580;AT2G45590;AT2G45600;AT2G45610;AT2G45620;AT2G45630;AT2G45640;AT2G45650;AT2G45660;AT2G45670;AT2G45680;AT2G45690;AT2G45695;AT2G45700;AT2G45710;AT2G45720…
ONT.3200.2	AT1G14860;AT1G14870;AT1G14880;AT1G14890;AT1G14900;AT1G14910;AT1G14920;AT1G14930;AT1G14940;AT1G14950;AT1G14960;AT1G14970;AT1G14980;AT1G14990;AT1G15000;AT1G15010;AT1G15015;AT1G15020;AT1G15030;AT1G15040;AT1G15045;AT1G15050;AT1G15060;AT1G15080;AT1G15100;AT1G15110;AT1G15120;AT1G15125;AT1G15130;AT1G15140;AT1G15150;AT1G15160;AT1G15165;AT1G15170;AT1G15180;AT1G15190;AT1G15200;AT1G15210;AT1G15215;AT1G15220…
ONT.7752.1	AT2G39360;AT2G39370;AT2G39380;AT2G39390;AT2G39400;AT2G39410;AT2G39415;AT2G39420;AT2G39430;AT2G39435;AT2G39440;AT2G39445;AT2G39450;AT2G39460;AT2G39470;AT2G39480;AT2G39490;AT2G39500;AT2G39510;AT2G39518;AT2G39520;AT2G39530;AT2G39540;AT2G39550;AT2G39560;AT2G39570;AT2G39580;AT2G39590;AT2G39620;AT2G39630;AT2G39640;AT2G39650;AT2G39660;AT2G39670;AT2G39690;AT2G39700;AT2G39705;AT2G39710;AT2G39720;AT2G39725…
ONT.3847.1	AT1G33850;AT1G33860;AT1G33870;AT1G33880;AT1G33890;AT1G33900;AT1G33910;AT1G33920;AT1G33925;AT1G33930;AT1G33940;AT1G33950;AT1G33960;AT1G33970;AT1G33980;AT1G33990;AT1G34000;AT1G34010;AT1G34020;AT1G34030;AT1G34040;AT1G34041;AT1G34042;AT1G34046;AT1G34047;AT1G34050;AT1G34060;AT1G34065;AT1G34070;AT1G34095;AT1G34110;AT1G34120;AT1G34130;AT1G34140;AT1G34150;AT1G34160;AT1G34170;AT1G34180;AT1G34190;AT1G34200…
ONT.7457.19	AT2G32430;AT2G32440;AT2G32450;AT2G32460;AT2G32470;AT2G32480;AT2G32487;AT2G32500;AT2G32510;AT2G32520;AT2G32530;AT2G32540;AT2G32550;AT2G32560;AT2G32580;AT2G32590;AT2G32600;AT2G32610;AT2G32620;AT2G32630;AT2G32640;AT2G32645;AT2G32650;AT2G32660;AT2G32670;AT2G32680;AT2G32700;AT2G32710;AT2G32720;AT2G32730;AT2G32740;AT2G32750;AT2G32760;AT2G32765;AT2G32770;AT2G32780;AT2G32785;AT2G32788;AT2G32790;AT2G32800…
ONT.18093.3	AT5G23150;AT5G23160;AT5G23170;AT5G23180;AT5G23190;AT5G23200;AT5G23210;AT5G23212;AT5G23220;AT5G23230;AT5G23240;AT5G23250;AT5G23260;AT5G23270;AT5G23280;AT5G23290;AT5G23300;AT5G23310;AT5G23320;AT5G23330;AT5G23340;AT5G23350;AT5G23360;AT5G23370;AT5G23380;AT5G23390;AT5G23395;AT5G23400;AT5G23405;AT5G23411;AT5G23420;AT5G23430;AT5G23440;AT5G23450;AT5G23460;AT5G23470;AT5G23480;AT5G23490;AT5G23510;AT5G23520…
ONT.16307.1	AT5G44340;AT5G44345;AT5G44350;AT5G44360;AT5G44370;AT5G44380;AT5G44390;AT5G44400;AT5G44410;AT5G44420;AT5G44430;AT5G44440;AT5G44450;AT5G44460;AT5G44470;AT5G44480;AT5G44490;AT5G44495;AT5G44500;AT5G44510;AT5G44520;AT5G44530;AT5G44540;AT5G44550;AT5G44560;AT5G44565;AT5G44568;AT5G44570;AT5G44572;AT5G44574;AT5G44575;AT5G44578;AT5G44580;AT5G44582;AT5G44585;AT5G44590;AT5G44600;AT5G44610;AT5G44620;AT5G44630…
ONT.10854.22	AT3G20170;AT3G20180;AT3G20190;AT3G20200;AT3G20210;AT3G20220;AT3G20230;AT3G20240;AT3G20250;AT3G20260;AT3G20270;AT3G20280;AT3G20290;AT3G20300;AT3G20310;AT3G20320;AT3G20330;AT3G20340;AT3G20350;AT3G20360;AT3G20362;AT3G20370;AT3G20380;AT3G20390;AT3G20395;AT3G20400;AT3G20410;AT3G20420;AT3G20430;AT3G20440;AT3G20450;AT3G20460;AT3G20475;AT3G20480;AT3G20490;AT3G20500;AT3G20510;AT3G20520;AT3G20530;AT3G20540…
ONT.7823.5	AT2G40960;AT2G40970;AT2G40980;AT2G40990;AT2G40995;AT2G41000;AT2G41010;AT2G41020;AT2G41040;AT2G41050;AT2G41060;AT2G41070;AT2G41080;AT2G41082;AT2G41090;AT2G41100;AT2G41110;AT2G41120;AT2G41130;AT2G41140;AT2G41150;AT2G41160;AT2G41170;AT2G41180;AT2G41190;AT2G41200;AT2G41210;AT2G41220;AT2G41225;AT2G41231;AT2G41233;AT2G41240;AT2G41250;AT2G41260;AT2G41280;AT2G41290;AT2G41300;AT2G41310;AT2G41330;AT2G41340…
ONT.2000.2	AT1G66245;AT1G66250;AT1G66260;AT1G66270;AT1G66280;AT1G66290;AT1G66300;AT1G66310;AT1G66320;AT1G66330;AT1G66340;AT1G66345;AT1G66350;AT1G66360;AT1G66370;AT1G66380;AT1G66390;AT1G66400;AT1G66410;AT1G66420;AT1G66430;AT1G66440;AT1G66450;AT1G66470;AT1G66475;AT1G66480;AT1G66490;AT1G66500;AT1G66510;AT1G66520;AT1G66530;AT1G66540;AT1G66550;AT1G66553;AT1G66560;AT1G66570;AT1G66580;AT1G66590;AT1G66600;AT1G66610…
ONT.18721.2	AT5G48160;AT5G48170;AT5G48175;AT5G48180;AT5G48190;AT5G48200;AT5G48205;AT5G48210;AT5G48220;AT5G48230;AT5G48240;AT5G48250;AT5G48270;AT5G48280;AT5G48290;AT5G48300;AT5G48310;AT5G48320;AT5G48330;AT5G48335;AT5G48340;AT5G48350;AT5G48360;AT5G48370;AT5G48375;AT5G48380;AT5G48385;AT5G48390;AT5G48400;AT5G48410;AT5G48420;AT5G48430;AT5G48440;AT5G48450;AT5G48460;AT5G48470;AT5G48480;AT5G48485;AT5G48490;AT5G48500…
ONT.7823.3	AT2G40960;AT2G40970;AT2G40980;AT2G40990;AT2G40995;AT2G41000;AT2G41010;AT2G41020;AT2G41040;AT2G41050;AT2G41060;AT2G41070;AT2G41080;AT2G41082;AT2G41090;AT2G41100;AT2G41110;AT2G41120;AT2G41130;AT2G41140;AT2G41150;AT2G41160;AT2G41170;AT2G41180;AT2G41190;AT2G41200;AT2G41210;AT2G41220;AT2G41225;AT2G41231;AT2G41233;AT2G41240;AT2G41250;AT2G41260;AT2G41280;AT2G41290;AT2G41300;AT2G41310;AT2G41330;AT2G41340…
ONT.17450.2	AT3G26400;AT4G08395;AT5G06360;AT5G06370;AT5G06380;AT5G06390;AT5G06400;AT5G06410;AT5G06420;AT5G06430;AT5G06440;AT5G06450;AT5G06460;AT5G06470;AT5G06480;AT5G06490;AT5G06500;AT5G06510;AT5G06520;AT5G06530;AT5G06540;AT5G06550;AT5G06560;AT5G06570;AT5G06580;AT5G06590;AT5G06600;AT5G06610;AT5G06620;AT5G06630;AT5G06650;AT5G06660;AT5G06670;AT5G06680;AT5G06690;AT5G06700;AT5G06710;AT5G06720;AT5G06730;AT5G06740…
ONT.13610.1	AT4G04570;AT4G04580;AT4G04601;AT4G04610;AT4G04614;AT4G04620;AT4G04630;AT4G04632;AT4G04640;AT4G04650;AT4G04670;AT4G04680;AT4G04690;AT4G04695;AT4G04700;AT4G04710;AT4G04720;AT4G04730;AT4G04740;AT4G04745;AT4G04750;AT4G04760;AT4G04770;AT4G04775;AT4G04780;AT4G04790;AT4G04800;AT4G04810;AT4G04830;AT4G04840;AT4G04850;AT4G04860;AT4G04870;AT4G04880;AT4G04885;ONT.12156;ONT.12158;ONT.6930
ONT.8254.1	AT3G04181;AT3G04184;AT3G04190;AT3G04200;AT3G04210;AT3G04220;AT3G04230;AT3G04240;AT3G04250;AT3G04260;AT3G04270;AT3G04280;AT3G04290;AT3G04300;AT3G04310;AT3G04320;AT3G04330;AT3G04340;AT3G04350;AT3G04360;AT3G04370;AT3G04380;AT3G04390;AT3G04400;AT3G04410;AT3G04420;AT3G04430;AT3G04440;AT3G04450;AT3G04460;AT3G04470;AT3G04480;AT3G04490;AT3G04500;AT3G04510;AT3G04520;AT3G04530;AT3G04540;AT3G04545;AT3G04550…
ONT.1312.1	AT1G35467;AT1G35470;AT1G35490;AT1G35500;AT1G35510;AT1G35515;AT1G35516;AT1G35520;AT1G35530;AT1G35537;AT1G35540;AT1G35550;AT1G35560;AT1G35580;AT1G35610;AT1G35614;AT1G35617;AT1G35620;AT1G35625;AT1G35630;AT1G35660;AT1G35670;AT1G35680;AT1G35710;AT1G35720;AT1G35730;ONT.1311
ONT.6764.4	AT2G05440;AT2G05500;AT2G05510;AT2G05520;AT2G05530;AT2G05540;AT2G05580;AT2G05590;AT2G05600;AT2G05620;AT2G05630;AT2G05635;AT2G05642;AT2G05645;AT2G05710;AT2G05720;AT2G05752;AT2G05753;AT2G05755;AT2G05760;ONT.6765
ONT.4293.6	AT1G58340;AT1G58350;AT1G58360;AT1G58370;AT1G58380;AT1G58390;AT1G58400;AT1G58410;AT1G58420;AT1G58430;AT1G58440;AT1G58450;AT1G58460;AT1G58470;AT1G58520;AT1G58602;AT1G58643;AT1G58684;AT1G58725;AT1G58766;AT1G58807;AT1G58848;AT1G58936;AT1G58983;AT1G59030;AT1G59077;AT1G59124;AT1G59171;AT1G59218;AT1G59312;AT1G59359
ONT.15981.2	AT5G28530;AT5G28540;AT5G28550;AT5G28560;AT5G28590;AT5G28610;AT5G28615;AT5G28620;AT5G28630;AT5G28640;AT5G28642;AT5G28646;AT5G28650;AT5G28660;ONT.15982
ONT.18130.1	AT5G24030;AT5G24040;AT5G24050;AT5G24060;AT5G24070;AT5G24080;AT5G24090;AT5G24100;AT5G24105;AT5G24110;AT5G24120;AT5G24130;AT5G24140;AT5G24150;AT5G24155;AT5G24160;AT5G24165;AT5G24170;AT5G24180;AT5G24190;AT5G24200;AT5G24210;AT5G24220;AT5G24230;AT5G24240;AT5G24250;AT5G24260;AT5G24270;AT5G24280;AT5G24290;AT5G24300;AT5G24310;AT5G24313;AT5G24314;AT5G24316;AT5G24318;AT5G24320;AT5G24330;AT5G24340;AT5G24350…
ONT.11183.2	AT1G33860;AT3G30160;AT3G30180;AT3G30200;AT3G30210;AT3G30220;AT3G30222;AT3G30230;AT3G30235;AT3G30247;AT3G30260;AT3G30280;AT3G30290;AT3G30300;AT3G30320;AT3G30340;AT5G55508
ONT.6104.49	AT2G35890;AT2G35900;AT2G35910;AT2G35920;AT2G35930;AT2G35940;AT2G35950;AT2G35960;AT2G35970;AT2G35980;AT2G35990;AT2G36000;AT2G36010;AT2G36020;AT2G36026;AT2G36030;AT2G36050;AT2G36053;AT2G36060;AT2G36070;AT2G36080;AT2G36090;AT2G36100;AT2G36110;AT2G36130;AT2G36145;AT2G36160;AT2G36170;AT2G36180;AT2G36190;AT2G36200;AT2G36210;AT2G36220;AT2G36230;AT2G36240;AT2G36250;AT2G36255;AT2G36260;AT2G36261;AT2G36270…
ONT.9151.1	AT3G26150;AT3G26160;AT3G26170;AT3G26180;AT3G26190;AT3G26200;AT3G26210;AT3G26220;AT3G26230;AT3G26235;AT3G26240;AT3G26250;AT3G26270;AT3G26280;AT3G26290;AT3G26300;AT3G26310;AT3G26320;AT3G26330;AT3G26340;AT3G26350;AT3G26360;AT3G26370;AT3G26380;AT3G26390;AT3G26400;AT3G26410;AT3G26420;AT3G26430;AT3G26440;AT3G26445;AT3G26450;AT3G26460;AT3G26470;AT3G26480;AT3G26490;AT3G26500;AT3G26510;AT3G26511;AT3G26520…
ONT.6104.6	AT2G35890;AT2G35900;AT2G35910;AT2G35920;AT2G35930;AT2G35940;AT2G35950;AT2G35960;AT2G35970;AT2G35980;AT2G35990;AT2G36000;AT2G36010;AT2G36020;AT2G36026;AT2G36030;AT2G36050;AT2G36053;AT2G36060;AT2G36070;AT2G36080;AT2G36090;AT2G36100;AT2G36110;AT2G36130;AT2G36145;AT2G36160;AT2G36170;AT2G36180;AT2G36190;AT2G36200;AT2G36210;AT2G36220;AT2G36230;AT2G36240;AT2G36250;AT2G36255;AT2G36260;AT2G36261;AT2G36270…
ONT.8771.11	AT1G23040;AT1G31630;AT1G31810;AT1G48620;AT1G54215;AT2G14890;AT2G25050;AT2G28671;AT3G05470;AT3G05920;AT3G16800;AT3G16810;AT3G16820;AT3G16830;AT3G16840;AT3G16850;AT3G16851;AT3G16857;AT3G16860;AT3G16870;AT3G16880;AT3G16890;AT3G16895;AT3G16900;AT3G16910;AT3G16920;AT3G16930;AT3G16940;AT3G16950;AT3G16960;AT3G16970;AT3G16980;AT3G16990;AT3G17000;AT3G17010;AT3G17020;AT3G17030;AT3G17040;AT3G17060;AT3G17070…
ONT.5914.2	AT2G30680;AT2G30690;AT2G30695;AT2G30700;AT2G30710;AT2G30720;AT2G30730;AT2G30740;AT2G30750;AT2G30760;AT2G30766;AT2G30770;AT2G30780;AT2G30790;AT2G30800;AT2G30810;AT2G30820;AT2G30830;AT2G30840;AT2G30860;AT2G30870;AT2G30880;AT2G30890;AT2G30900;AT2G30910;AT2G30920;AT2G30925;AT2G30930;AT2G30933;AT2G30940;AT2G30942;AT2G30950;AT2G30960;AT2G30970;AT2G30980;AT2G30985;AT2G30990;AT2G31005;AT2G31010;AT2G31018…
ONT.10854.14	AT3G20170;AT3G20180;AT3G20190;AT3G20200;AT3G20210;AT3G20220;AT3G20230;AT3G20240;AT3G20250;AT3G20260;AT3G20270;AT3G20280;AT3G20290;AT3G20300;AT3G20310;AT3G20320;AT3G20330;AT3G20340;AT3G20350;AT3G20360;AT3G20362;AT3G20370;AT3G20380;AT3G20390;AT3G20395;AT3G20400;AT3G20410;AT3G20420;AT3G20430;AT3G20440;AT3G20450;AT3G20460;AT3G20475;AT3G20480;AT3G20490;AT3G20500;AT3G20510;AT3G20520;AT3G20530;AT3G20540…
ONT.10312.3	AT3G06970;AT3G06980;AT3G06985;AT3G06990;AT3G07000;AT3G07005;AT3G07010;AT3G07020;AT3G07030;AT3G07040;AT3G07050;AT3G07060;AT3G07070;AT3G07080;AT3G07090;AT3G07100;AT3G07110;AT3G07120;AT3G07130;AT3G07140;AT3G07150;AT3G07160;AT3G07170;AT3G07180;AT3G07190;AT3G07195;AT3G07200;AT3G07210;AT3G07220;AT3G07230;AT3G07250;AT3G07260;AT3G07270;AT3G07273;AT3G07290;AT3G07300;AT3G07310;AT3G07320;AT3G07330;AT3G07340…
ONT.12195.9	AT4G07515;AT4G07524;AT4G07526
ONT.9295.11	AT3G42723;AT3G42725;AT3G42770;AT3G42780;AT3G42786;AT3G42790;AT3G42800;AT3G42830;AT3G42850;AT3G42860;AT3G42870;AT3G42880;AT3G42940;AT3G42950
ONT.4956.2	AT1G01073;AT1G76820;AT1G76830;AT1G76840;AT1G76850;AT1G76860;AT1G76870;AT1G76880;AT1G76890;AT1G76900;AT1G76910;AT1G76920;AT1G76930;AT1G76940;AT1G76950;AT1G76952;AT1G76954;AT1G76955;AT1G76960;AT1G76965;AT1G76970;AT1G76980;AT1G76990;AT1G76994;AT1G77000;AT1G77010;AT1G77020;AT1G77030;AT1G77060;AT1G77080;AT1G77090;AT1G77093;AT1G77100;AT1G77110;AT1G77120;AT1G77122;AT1G77130;AT1G77140;AT1G77145;AT1G77150…
ONT.8254.2	AT3G04181;AT3G04184;AT3G04190;AT3G04200;AT3G04210;AT3G04220;AT3G04230;AT3G04240;AT3G04250;AT3G04260;AT3G04270;AT3G04280;AT3G04290;AT3G04300;AT3G04310;AT3G04320;AT3G04330;AT3G04340;AT3G04350;AT3G04360;AT3G04370;AT3G04380;AT3G04390;AT3G04400;AT3G04410;AT3G04420;AT3G04430;AT3G04440;AT3G04450;AT3G04460;AT3G04470;AT3G04480;AT3G04490;AT3G04500;AT3G04510;AT3G04520;AT3G04530;AT3G04540;AT3G04545;AT3G04550…
ONT.3699.1	AT1G29270;AT1G29280;AT1G29290;AT1G29300;AT1G29310;AT1G29320;AT1G29330;AT1G29340;AT1G29350;AT1G29355;AT1G29370;AT1G29380;AT1G29390;AT1G29395;AT1G29400;AT1G29410;AT1G29418;AT1G29420;AT1G29430;AT1G29440;AT1G29450;AT1G29460;AT1G29465;AT1G29470;AT1G29480;AT1G29490;AT1G29500;AT1G29510;AT1G29520;AT1G29530;AT1G29540;AT1G29550;AT1G29560;AT1G29570;AT1G29580;AT1G29590;AT1G29600;AT1G29620;AT1G29630;AT1G29640…
ONT.11134.1	AT3G27800;AT3G27809;AT3G27810;AT3G27820;AT3G27830;AT3G27831;AT3G27835;AT3G27840;AT3G27850;AT3G27860;AT3G27870;AT3G27880;AT3G27890;AT3G27900;AT3G27906;AT3G27910;AT3G27920;AT3G27925;AT3G27930;AT3G27940;AT3G27950;AT3G27960;AT3G27968;AT3G27970;AT3G27980;AT3G27999;AT3G28007;AT3G28020;AT3G28030;AT3G28040;AT3G28050;AT3G28060;AT3G28070;AT3G28080;AT3G28100;AT3G28120;AT3G28130;AT3G28140;AT3G28150;AT3G28155…
ONT.17379.3	AT5G04600;AT5G04610;AT5G04620;AT5G04630;AT5G04640;AT5G04660;AT5G04670;AT5G04680;AT5G04690;AT5G04700;AT5G04710;AT5G04720;AT5G04730;AT5G04740;AT5G04750;AT5G04760;AT5G04770;AT5G04780;AT5G04790;AT5G04800;AT5G04810;AT5G04820;AT5G04830;AT5G04840;AT5G04850;AT5G04853;AT5G04860;AT5G04870;AT5G04885;AT5G04890;AT5G04895;AT5G04900;AT5G04910;AT5G04920;AT5G04930;AT5G04940;AT5G04950;AT5G04960;AT5G04970;AT5G04980…
ONT.9289.5	AT3G41762;AT3G42050;AT3G42060;AT3G42130;AT3G42140;AT3G42148;AT3G42150;AT3G42155;AT3G42160;AT3G42170;AT3G42180;ONT.9285;ONT.9286;ONT.9287;ONT.9288
ONT.6104.22	AT2G35890;AT2G35900;AT2G35910;AT2G35920;AT2G35930;AT2G35940;AT2G35950;AT2G35960;AT2G35970;AT2G35980;AT2G35990;AT2G36000;AT2G36010;AT2G36020;AT2G36026;AT2G36030;AT2G36050;AT2G36053;AT2G36060;AT2G36070;AT2G36080;AT2G36090;AT2G36100;AT2G36110;AT2G36130;AT2G36145;AT2G36160;AT2G36170;AT2G36180;AT2G36190;AT2G36200;AT2G36210;AT2G36220;AT2G36230;AT2G36240;AT2G36250;AT2G36255;AT2G36260;AT2G36261;AT2G36270…
ONT.6104.30	AT2G35890;AT2G35900;AT2G35910;AT2G35920;AT2G35930;AT2G35940;AT2G35950;AT2G35960;AT2G35970;AT2G35980;AT2G35990;AT2G36000;AT2G36010;AT2G36020;AT2G36026;AT2G36030;AT2G36050;AT2G36053;AT2G36060;AT2G36070;AT2G36080;AT2G36090;AT2G36100;AT2G36110;AT2G36130;AT2G36145;AT2G36160;AT2G36170;AT2G36180;AT2G36190;AT2G36200;AT2G36210;AT2G36220;AT2G36230;AT2G36240;AT2G36250;AT2G36255;AT2G36260;AT2G36261;AT2G36270…
ONT.12147.1	AT4G04030;AT4G04040;AT4G04078;AT4G04080;AT4G04090;AT4G04110;AT4G04180;AT4G04190;AT4G04200;AT4G04210;AT4G04220;AT4G04260;AT4G04320;AT4G04330;AT4G04340;AT4G04350;AT4G04360;AT4G04370;ONT.13602
ONT.11862.1	AT3G60245;AT3G60250;AT3G60260;AT3G60270;AT3G60280;AT3G60286;AT3G60290;AT3G60300;AT3G60310;AT3G60318;AT3G60320;AT3G60328;AT3G60330;AT3G60340;AT3G60350;AT3G60360;AT3G60370;AT3G60380;AT3G60390;AT3G60400;AT3G60410;AT3G60420;AT3G60440;AT3G60450;AT3G60460;AT3G60470;AT3G60480;AT3G60490;AT3G60500;AT3G60510;AT3G60520;AT3G60530;AT3G60540;AT3G60550;AT3G60560;AT3G60570;AT3G60580;AT3G60590;AT3G60600;AT3G60620…
ONT.10854.1	AT3G20170;AT3G20180;AT3G20190;AT3G20200;AT3G20210;AT3G20220;AT3G20230;AT3G20240;AT3G20250;AT3G20260;AT3G20270;AT3G20280;AT3G20290;AT3G20300;AT3G20310;AT3G20320;AT3G20330;AT3G20340;AT3G20350;AT3G20360;AT3G20362;AT3G20370;AT3G20380;AT3G20390;AT3G20395;AT3G20400;AT3G20410;AT3G20420;AT3G20430;AT3G20440;AT3G20450;AT3G20460;AT3G20475;AT3G20480;AT3G20490;AT3G20500;AT3G20510;AT3G20520;AT3G20530;AT3G20540…
ONT.19348.1	AT1G77080;AT5G64770;AT5G64780;AT5G64790;AT5G64800;AT5G64810;AT5G64813;AT5G64816;AT5G64820;AT5G64830;AT5G64840;AT5G64850;AT5G64860;AT5G64870;AT5G64880;AT5G64890;AT5G64900;AT5G64905;AT5G64910;AT5G64920;AT5G64930;AT5G64940;AT5G64950;AT5G64960;AT5G64970;AT5G64980;AT5G64990;AT5G65000;AT5G65005;AT5G65010;AT5G65020;AT5G65030;AT5G65040;AT5G65050;AT5G65060;AT5G65070;AT5G65080;AT5G65090;AT5G65100;AT5G65110…
ONT.18983.5	AT5G55930;AT5G55940;AT5G55950;AT5G55960;AT5G55970;AT5G55980;AT5G55990;AT5G56000;AT5G56010;AT5G56020;AT5G56030;AT5G56040;AT5G56050;AT5G56060;AT5G56070;AT5G56075;AT5G56080;AT5G56090;AT5G56100;AT5G56110;AT5G56120;AT5G56130;AT5G56140;AT5G56150;AT5G56160;AT5G56170;AT5G56180;AT5G56190;AT5G56200;AT5G56220;AT5G56230;AT5G56240;AT5G56250;AT5G56260;AT5G56270;AT5G56280;AT5G56290;AT5G56300;AT5G56310;AT5G56320…
ONT.13610.3	AT4G04570;AT4G04580;AT4G04601;AT4G04610;AT4G04614;AT4G04620;AT4G04630;AT4G04632;AT4G04640;AT4G04650;AT4G04670;AT4G04680;AT4G04690;AT4G04695;AT4G04700;AT4G04710;AT4G04720;AT4G04730;AT4G04740;AT4G04745;AT4G04750;AT4G04760;AT4G04770;AT4G04775;AT4G04780;AT4G04790;AT4G04800;AT4G04810;AT4G04830;AT4G04840;AT4G04850;AT4G04860;AT4G04870;AT4G04880;AT4G04885;ONT.12156;ONT.12158;ONT.6930
ONT.10854.23	AT3G20170;AT3G20180;AT3G20190;AT3G20200;AT3G20210;AT3G20220;AT3G20230;AT3G20240;AT3G20250;AT3G20260;AT3G20270;AT3G20280;AT3G20290;AT3G20300;AT3G20310;AT3G20320;AT3G20330;AT3G20340;AT3G20350;AT3G20360;AT3G20362;AT3G20370;AT3G20380;AT3G20390;AT3G20395;AT3G20400;AT3G20410;AT3G20420;AT3G20430;AT3G20440;AT3G20450;AT3G20460;AT3G20475;AT3G20480;AT3G20490;AT3G20500;AT3G20510;AT3G20520;AT3G20530;AT3G20540…
ONT.6104.19	AT2G35890;AT2G35900;AT2G35910;AT2G35920;AT2G35930;AT2G35940;AT2G35950;AT2G35960;AT2G35970;AT2G35980;AT2G35990;AT2G36000;AT2G36010;AT2G36020;AT2G36026;AT2G36030;AT2G36050;AT2G36053;AT2G36060;AT2G36070;AT2G36080;AT2G36090;AT2G36100;AT2G36110;AT2G36130;AT2G36145;AT2G36160;AT2G36170;AT2G36180;AT2G36190;AT2G36200;AT2G36210;AT2G36220;AT2G36230;AT2G36240;AT2G36250;AT2G36255;AT2G36260;AT2G36261;AT2G36270…
ONT.11390.1	AT3G48550;AT3G48560;AT3G48570;AT3G48580;AT3G48590;AT3G48600;AT3G48610;AT3G48620;AT3G48630;AT3G48640;AT3G48660;AT3G48670;AT3G48675;AT3G48680;AT3G48690;AT3G48700;AT3G48710;AT3G48720;AT3G48730;AT3G48740;AT3G48750;AT3G48760;AT3G48770;AT3G48780;AT3G48790;AT3G48800;AT3G48810;AT3G48820;AT3G48830;AT3G48840;AT3G48850;AT3G48860;AT3G48870;AT3G48880;AT3G48890;AT3G48900;AT3G48920;AT3G48930;AT3G48940;AT3G48950…
ONT.12058.1	AT4G01535;AT4G01540;AT4G01550;AT4G01560;AT4G01570;AT4G01575;AT4G01580;AT4G01590;AT4G01595;AT4G01600;AT4G01610;AT4G01630;AT4G01640;AT4G01650;AT4G01660;AT4G01670;AT4G01671;AT4G01680;AT4G01690;AT4G01700;AT4G01703;AT4G01710;AT4G01720;AT4G01730;AT4G01735;AT4G01740;AT4G01750;AT4G01760;AT4G01770;AT4G01780;AT4G01790;AT4G01800;AT4G01810;AT4G01820;AT4G01830;AT4G01840;AT4G01850;AT4G01860;AT4G01870;AT4G01880…
ONT.12195.2	AT4G07515;AT4G07524;AT4G07526
ONT.7457.16	AT2G32430;AT2G32440;AT2G32450;AT2G32460;AT2G32470;AT2G32480;AT2G32487;AT2G32500;AT2G32510;AT2G32520;AT2G32530;AT2G32540;AT2G32550;AT2G32560;AT2G32580;AT2G32590;AT2G32600;AT2G32610;AT2G32620;AT2G32630;AT2G32640;AT2G32645;AT2G32650;AT2G32660;AT2G32670;AT2G32680;AT2G32700;AT2G32710;AT2G32720;AT2G32730;AT2G32740;AT2G32750;AT2G32760;AT2G32765;AT2G32770;AT2G32780;AT2G32785;AT2G32788;AT2G32790;AT2G32800…
ONT.6921.6	AT2G18160;AT2G18170;AT2G18180;AT2G18190;AT2G18193;AT2G18196;AT2G18200;AT2G18210;AT2G18220;AT2G18230;AT2G18240;AT2G18245;AT2G18250;AT2G18260;AT2G18270;AT2G18280;AT2G18290;AT2G18300;AT2G18320;AT2G18328;AT2G18330;AT2G18340;AT2G18350;AT2G18360;AT2G18370;AT2G18380;AT2G18390;AT2G18400;AT2G18410;AT2G18420;AT2G18450;AT2G18460;AT2G18465;AT2G18470;AT2G18480;AT2G18490;AT2G18500;AT2G18510;AT2G18520;AT2G18530…
ONT.11390.2	AT3G48550;AT3G48560;AT3G48570;AT3G48580;AT3G48590;AT3G48600;AT3G48610;AT3G48620;AT3G48630;AT3G48640;AT3G48660;AT3G48670;AT3G48675;AT3G48680;AT3G48690;AT3G48700;AT3G48710;AT3G48720;AT3G48730;AT3G48740;AT3G48750;AT3G48760;AT3G48770;AT3G48780;AT3G48790;AT3G48800;AT3G48810;AT3G48820;AT3G48830;AT3G48840;AT3G48850;AT3G48860;AT3G48870;AT3G48880;AT3G48890;AT3G48900;AT3G48920;AT3G48930;AT3G48940;AT3G48950…
ONT.508.1	AT1G13220;AT1G13230;AT1G13245;AT1G13250;AT1G13260;AT1G13270;AT1G13280;AT1G13290;AT1G13300;AT1G13310;AT1G13320;AT1G13330;AT1G13340;AT1G13350;AT1G13360;AT1G13370;AT1G13380;AT1G13390;AT1G13400;AT1G13410;AT1G13420;AT1G13430;AT1G13440;AT1G13450;AT1G13460;AT1G13470;AT1G13480;AT1G13485;AT1G13490;AT1G13500;AT1G13510;AT1G13520;AT1G13530;AT1G13540;AT1G13550;AT1G13560;AT1G13570;AT1G13580;AT1G13590;AT1G13600…
ONT.9606.3	AT3G52270;AT3G52280;AT3G52290;AT3G52300;AT3G52302;AT3G52310;AT3G52320;AT3G52330;AT3G52340;AT3G52350;AT3G52360;AT3G52370;AT3G52380;AT3G52390;AT3G52400;AT3G52420;AT3G52430;AT3G52440;AT3G52450;AT3G52460;AT3G52470;AT3G52480;AT3G52490;AT3G52500;AT3G52510;AT3G52520;AT3G52525;AT3G52540;AT3G52550;AT3G52560;AT3G52561;AT3G52570;AT3G52580;AT3G52590;AT3G52600;AT3G52610;AT3G52620;AT3G52630;AT3G52640;AT3G52660…
ONT.13601.1	AT4G03827;AT4G03830;AT4G03930;AT4G03940;AT4G03945;AT4G03950;AT4G03960;AT4G03965;AT4G04020;AT4G04030;AT4G04040;AT4G04078;AT4G04080;AT4G04090;AT4G04110;ONT.13600;ONT.9216
ONT.19578.2	ATMG00680;ATMG00690;ATMG00710;ATMG00720;ATMG00730;ATMG00740;ATMG00750;ATMG00760;ATMG00770;ATMG00810;ATMG00820;ATMG00830;ATMG00840;ATMG00850;ATMG00860;ATMG00870;ATMG00880;ATMG00890;ATMG00900;ATMG00910;ATMG00920;ATMG00940;ATMG00960;ATMG00970;ATMG00980;ATMG00990;ATMG01000;ATMG01010;ATMG01020;ATMG01030;ATMG01040;ATMG01050;ATMG01060;ATMG01080;ATMG01090;ATMG01100;ATMG01110;ATMG01130;ATMG01140;ATMG01150…
ONT.18840.1	AT5G51200;AT5G51210;AT5G51220;AT5G51230;AT5G51250;AT5G51260;AT5G51270;AT5G51280;AT5G51290;AT5G51300;AT5G51310;AT5G51330;AT5G51340;AT5G51350;AT5G51360;AT5G51370;AT5G51380;AT5G51390;AT5G51400;AT5G51410;AT5G51420;AT5G51430;AT5G51440;AT5G51450;AT5G51451;AT5G51460;AT5G51470;AT5G51480;AT5G51490;AT5G51500;AT5G51510;AT5G51520;AT5G51530;AT5G51540;AT5G51545;AT5G51550;AT5G51560;AT5G51570;AT5G51580;AT5G51590…
ONT.11291.4	AT3G46190;AT3G46200;AT3G46206;AT3G46210;AT3G46220;AT3G46230;AT3G46240;AT3G46260;AT3G46270;AT3G46280;AT3G46290;AT3G46300;AT3G46310;AT3G46320;AT3G46330;AT3G46340;AT3G46350;AT3G46360;AT3G46370;AT3G46380;AT3G46390;AT3G46400;AT3G46410;AT3G46420;AT3G46430;AT3G46440;AT3G46450;AT3G46460;AT3G46470;AT3G46480;AT3G46490;AT3G46500;AT3G46510;AT3G46520;AT3G46530;AT3G46540;AT3G46550;AT3G46560;AT3G46570;AT3G46580…
ONT.17612.1	AT5G10660;AT5G10680;AT5G10690;AT5G10695;AT5G10700;AT5G10710;AT5G10720;AT5G10730;AT5G10740;AT5G10745;AT5G10750;AT5G10760;AT5G10770;AT5G10780;AT5G10790;AT5G10800;AT5G10810;AT5G10820;AT5G10830;AT5G10840;AT5G10860;AT5G10870;AT5G10880;AT5G10890;AT5G10900;AT5G10910;AT5G10920;AT5G10930;AT5G10940;AT5G10946;AT5G10950;AT5G10960;AT5G10970;AT5G10980;AT5G10990;AT5G11000;AT5G11010;AT5G11020;AT5G11027;AT5G11030…
ONT.13646.1	AT4G06676;AT4G06688
ONT.12195.3	AT4G07515;AT4G07524;AT4G07526
ONT.11183.1	AT1G33860;AT3G30160;AT3G30180;AT3G30200;AT3G30210;AT3G30220;AT3G30222;AT3G30230;AT3G30235;AT3G30247;AT3G30260;AT3G30280;AT3G30290;AT3G30300;AT3G30320;AT3G30340;AT5G55508
ONT.4076.2	AT1G51538;AT1G51540;AT1G51550;AT1G51560;AT1G51570;AT1G51580;AT1G51590;AT1G51600;AT1G51610;AT1G51620;AT1G51630;AT1G51640;AT1G51650;AT1G51660;AT1G51670;AT1G51680;AT1G51690;AT1G51700;AT1G51710;AT1G51720;AT1G51730;AT1G51740;AT1G51745;AT1G51760;AT1G51770;AT1G51780;AT1G51800;AT1G51805;AT1G51810;AT1G51820;AT1G51823;AT1G51830;AT1G51840;AT1G51850;AT1G51860;AT1G51870;AT1G51880;AT1G51890;AT1G51900;AT1G51910…
ONT.2770.34	AT1G04890;AT1G04900;AT1G04910;AT1G04920;AT1G04930;AT1G04940;AT1G04945;AT1G04950;AT1G04960;AT1G04970;AT1G04980;AT1G04985;AT1G04990;AT1G05000;AT1G05010;AT1G05020;AT1G05030;AT1G05040;AT1G05055;AT1G05060;AT1G05065;AT1G05070;AT1G05080;AT1G05085;AT1G05090;AT1G05100;AT1G05120;AT1G05136;AT1G05140;AT1G05150;AT1G05160;AT1G05170;AT1G05180;AT1G05190;AT1G05200;AT1G05205;AT1G05210;AT1G05220;AT1G05230;AT1G05240…
ONT.6104.38	AT2G35890;AT2G35900;AT2G35910;AT2G35920;AT2G35930;AT2G35940;AT2G35950;AT2G35960;AT2G35970;AT2G35980;AT2G35990;AT2G36000;AT2G36010;AT2G36020;AT2G36026;AT2G36030;AT2G36050;AT2G36053;AT2G36060;AT2G36070;AT2G36080;AT2G36090;AT2G36100;AT2G36110;AT2G36130;AT2G36145;AT2G36160;AT2G36170;AT2G36180;AT2G36190;AT2G36200;AT2G36210;AT2G36220;AT2G36230;AT2G36240;AT2G36250;AT2G36255;AT2G36260;AT2G36261;AT2G36270…
ONT.13983.2	AT4G16780;AT4G16790;AT4G16800;AT4G16807;AT4G16810;AT4G16820;AT4G16830;AT4G16835;AT4G16840;AT4G16845;AT4G16850;AT4G16855;AT4G16860;AT4G16880;AT4G16890;AT4G16900;AT4G16915;AT4G16920;AT4G16930;AT4G16940;AT4G16950;AT4G16970;AT4G16980;AT4G16990;AT4G17000;AT4G17010;AT4G17020;AT4G17030;AT4G17040;AT4G17050;AT4G17060;AT4G17070;AT4G17080;AT4G17085;AT4G17090;AT4G17100;AT4G17140;AT4G17150;AT4G17160;ONT.12509…
ONT.7457.13	AT2G32430;AT2G32440;AT2G32450;AT2G32460;AT2G32470;AT2G32480;AT2G32487;AT2G32500;AT2G32510;AT2G32520;AT2G32530;AT2G32540;AT2G32550;AT2G32560;AT2G32580;AT2G32590;AT2G32600;AT2G32610;AT2G32620;AT2G32630;AT2G32640;AT2G32645;AT2G32650;AT2G32660;AT2G32670;AT2G32680;AT2G32700;AT2G32710;AT2G32720;AT2G32730;AT2G32740;AT2G32750;AT2G32760;AT2G32765;AT2G32770;AT2G32780;AT2G32785;AT2G32788;AT2G32790;AT2G32800…
ONT.6104.68	AT2G35890;AT2G35900;AT2G35910;AT2G35920;AT2G35930;AT2G35940;AT2G35950;AT2G35960;AT2G35970;AT2G35980;AT2G35990;AT2G36000;AT2G36010;AT2G36020;AT2G36026;AT2G36030;AT2G36050;AT2G36053;AT2G36060;AT2G36070;AT2G36080;AT2G36090;AT2G36100;AT2G36110;AT2G36130;AT2G36145;AT2G36160;AT2G36170;AT2G36180;AT2G36190;AT2G36200;AT2G36210;AT2G36220;AT2G36230;AT2G36240;AT2G36250;AT2G36255;AT2G36260;AT2G36261;AT2G36270…
ONT.16241.3	AT5G23411;AT5G42591;AT5G42600;AT5G42610;AT5G42620;AT5G42630;AT5G42635;AT5G42640;AT5G42650;AT5G42655;AT5G42660;AT5G42670;AT5G42680;AT5G42690;AT5G42700;AT5G42710;AT5G42720;AT5G42740;AT5G42750;AT5G42760;AT5G42765;AT5G42770;AT5G42780;AT5G42785;AT5G42790;AT5G42797;AT5G42800;AT5G42810;AT5G42820;AT5G42825;AT5G42830;AT5G42840;AT5G42850;AT5G42860;AT5G42870;AT5G42880;AT5G42890;AT5G42895;AT5G42900;AT5G42905…
ONT.5914.1	AT2G30680;AT2G30690;AT2G30695;AT2G30700;AT2G30710;AT2G30720;AT2G30730;AT2G30740;AT2G30750;AT2G30760;AT2G30766;AT2G30770;AT2G30780;AT2G30790;AT2G30800;AT2G30810;AT2G30820;AT2G30830;AT2G30840;AT2G30860;AT2G30870;AT2G30880;AT2G30890;AT2G30900;AT2G30910;AT2G30920;AT2G30925;AT2G30930;AT2G30933;AT2G30940;AT2G30942;AT2G30950;AT2G30960;AT2G30970;AT2G30980;AT2G30985;AT2G30990;AT2G31005;AT2G31010;AT2G31018…
ONT.17370.1	AT5G04410;AT5G04420;AT5G04430;AT5G04440;AT5G04460;AT5G04470;AT5G04480;AT5G04490;AT5G04500;AT5G04510;AT5G04520;AT5G04530;AT5G04540;AT5G04550;AT5G04560;AT5G04590;AT5G04600;AT5G04610;AT5G04620;AT5G04630;AT5G04640;AT5G04660;AT5G04670;AT5G04680;AT5G04690;AT5G04700;AT5G04710;AT5G04720;AT5G04730;AT5G04740;AT5G04750;AT5G04760;AT5G04770;AT5G04780;AT5G04790;AT5G04800;AT5G04810;AT5G04820;AT5G04830;AT5G04840…
ONT.8717.2	AT3G15510;AT3G15518;AT3G15520;AT3G15530;AT3G15534;AT3G15540;AT3G15548;AT3G15550;AT3G15570;AT3G15578;AT3G15580;AT3G15590;AT3G15604;AT3G15605;AT3G15610;AT3G15620;AT3G15630;AT3G15640;AT3G15650;AT3G15660;AT3G15670;AT3G15680;AT3G15690;AT3G15700;AT3G15710;AT3G15720;AT3G15730;AT3G15740;AT3G15750;AT3G15760;AT3G15770;AT3G15790;AT3G15800;AT3G15810;AT3G15820;AT3G15830;AT3G15840;AT3G15850;AT3G15860;AT3G15870…
ONT.19578.3	AT2G07835;ATMG00680;ATMG00690;ATMG00710;ATMG00720;ATMG00730;ATMG00740;ATMG00750;ATMG00760;ATMG00770;ATMG00810;ATMG00820;ATMG00830;ATMG00840;ATMG00850;ATMG00860;ATMG00870;ATMG00880;ATMG00890;ATMG00900;ATMG00910;ATMG00920;ATMG00940;ATMG00960;ATMG00970;ATMG00980;ATMG00990;ATMG01000;ATMG01010;ATMG01020;ATMG01030;ATMG01040;ATMG01050;ATMG01060;ATMG01080;ATMG01090;ATMG01100;ATMG01110;ATMG01130;ATMG01140…
ONT.8777.1	AT3G16870;AT3G16880;AT3G16890;AT3G16895;AT3G16900;AT3G16910;AT3G16920;AT3G16930;AT3G16940;AT3G16950;AT3G16960;AT3G16970;AT3G16980;AT3G16990;AT3G17000;AT3G17010;AT3G17020;AT3G17030;AT3G17040;AT3G17060;AT3G17070;AT3G17080;AT3G17090;AT3G17100;AT3G17120;AT3G17130;AT3G17140;AT3G17150;AT3G17152;AT3G17155;AT3G17160;AT3G17170;AT3G17180;AT3G17190;AT3G17205;AT3G17210;AT3G17220;AT3G17225;AT3G17230;AT3G17240…
ONT.2770.22	AT1G04890;AT1G04900;AT1G04910;AT1G04920;AT1G04930;AT1G04940;AT1G04945;AT1G04950;AT1G04960;AT1G04970;AT1G04980;AT1G04985;AT1G04990;AT1G05000;AT1G05010;AT1G05020;AT1G05030;AT1G05040;AT1G05055;AT1G05060;AT1G05065;AT1G05070;AT1G05080;AT1G05085;AT1G05090;AT1G05100;AT1G05120;AT1G05136;AT1G05140;AT1G05150;AT1G05160;AT1G05170;AT1G05180;AT1G05190;AT1G05200;AT1G05205;AT1G05210;AT1G05220;AT1G05230;AT1G05240…
ONT.9606.8	AT3G52270;AT3G52280;AT3G52290;AT3G52300;AT3G52302;AT3G52310;AT3G52320;AT3G52330;AT3G52340;AT3G52350;AT3G52360;AT3G52370;AT3G52380;AT3G52390;AT3G52400;AT3G52420;AT3G52430;AT3G52440;AT3G52450;AT3G52460;AT3G52470;AT3G52480;AT3G52490;AT3G52500;AT3G52510;AT3G52520;AT3G52525;AT3G52530;AT3G52540;AT3G52550;AT3G52560;AT3G52561;AT3G52570;AT3G52580;AT3G52590;AT3G52600;AT3G52610;AT3G52620;AT3G52630;AT3G52640…
ONT.2770.1	AT1G04890;AT1G04900;AT1G04910;AT1G04920;AT1G04930;AT1G04940;AT1G04945;AT1G04950;AT1G04960;AT1G04970;AT1G04980;AT1G04985;AT1G04990;AT1G05000;AT1G05010;AT1G05020;AT1G05030;AT1G05040;AT1G05055;AT1G05060;AT1G05065;AT1G05070;AT1G05080;AT1G05085;AT1G05090;AT1G05100;AT1G05120;AT1G05136;AT1G05140;AT1G05150;AT1G05160;AT1G05170;AT1G05180;AT1G05190;AT1G05200;AT1G05205;AT1G05210;AT1G05220;AT1G05230;AT1G05240…
ONT.18984.2	AT5G55940;AT5G55950;AT5G55960;AT5G55970;AT5G55980;AT5G55990;AT5G56000;AT5G56010;AT5G56020;AT5G56030;AT5G56040;AT5G56050;AT5G56060;AT5G56070;AT5G56075;AT5G56080;AT5G56090;AT5G56100;AT5G56110;AT5G56120;AT5G56130;AT5G56140;AT5G56150;AT5G56160;AT5G56170;AT5G56180;AT5G56190;AT5G56200;AT5G56210;AT5G56220;AT5G56230;AT5G56240;AT5G56250;AT5G56260;AT5G56270;AT5G56280;AT5G56290;AT5G56300;AT5G56310;AT5G56320…
ONT.14363.1	AT4G26430;AT4G26440;AT4G26450;AT4G26455;AT4G26460;AT4G26466;AT4G26470;AT4G26480;AT4G26483;AT4G26485;AT4G26490;AT4G26500;AT4G26510;AT4G26520;AT4G26530;AT4G26540;AT4G26550;AT4G26555;AT4G26560;AT4G26570;AT4G26580;AT4G26590;AT4G26600;AT4G26610;AT4G26620;AT4G26630;AT4G26640;AT4G26650;AT4G26660;AT4G26670;AT4G26680;AT4G26690;AT4G26700;AT4G26701;AT4G26710;AT4G26720;AT4G26730;AT4G26740;AT4G26750;AT4G26760…
ONT.15003.1	AT5G02230;AT5G02240;AT5G02250;AT5G02260;AT5G02270;AT5G02280;AT5G02290;AT5G02310;AT5G02320;AT5G02330;AT5G02340;AT5G02350;AT5G02360;AT5G02370;AT5G02380;AT5G02390;AT5G02400;AT5G02410;AT5G02420;AT5G02430;AT5G02440;AT5G02450;AT5G02460;AT5G02470;AT5G02480;AT5G02490;AT5G02500;AT5G02502;AT5G02510;AT5G02520;AT5G02530;AT5G02540;AT5G02550;AT5G02560;AT5G02570;AT5G02580;AT5G02590;AT5G02600;AT5G02610;AT5G02620…
ONT.4216.4	AT1G55450;AT1G55460;AT1G55475;AT1G55480;AT1G55490;AT1G55500;AT1G55510;AT1G55520;AT1G55530;AT1G55535;AT1G55540;AT1G55546;AT1G55550;AT1G55560;AT1G55570;AT1G55580;AT1G55590;AT1G55600;AT1G55610;AT1G55615;AT1G55620;AT1G55630;AT1G55640;AT1G55650;AT1G55660;AT1G55670;AT1G55680;AT1G55690;AT1G55700;AT1G55710;AT1G55720;AT1G55730;AT1G55740;AT1G55750;AT1G55760;AT1G55770;AT1G55790;AT1G55800;AT1G55805;AT1G55810…
ONT.18152.4	AT5G24510;AT5G24520;AT5G24530;AT5G24540;AT5G24550;AT5G24560;AT5G24570;AT5G24580;AT5G24590;AT5G24593;AT5G24600;AT5G24610;AT5G24620;AT5G24630;AT5G24640;AT5G24650;AT5G24655;AT5G24660;AT5G24670;AT5G24680;AT5G24690;AT5G24710;AT5G24740;AT5G24750;AT5G24760;AT5G24770;AT5G24780;AT5G24790;AT5G24800;AT5G24810;AT5G24820;AT5G24830;AT5G24840;AT5G24850;AT5G24860;AT5G24870;AT5G24879;AT5G24880;AT5G24890;AT5G24900
ONT.4293.3	AT1G58340;AT1G58350;AT1G58360;AT1G58370;AT1G58380;AT1G58390;AT1G58400;AT1G58410;AT1G58420;AT1G58430;AT1G58440;AT1G58450;AT1G58460;AT1G58470;AT1G58520;AT1G58602;AT1G58643;AT1G58684;AT1G58725;AT1G58766;AT1G58807;AT1G58848;AT1G58936;AT1G58983;AT1G59030;AT1G59077;AT1G59124;AT1G59171;AT1G59218;AT1G59312;AT1G59359
ONT.17957.2	AT5G19470;AT5G19473;AT5G19480;AT5G19485;AT5G19490;AT5G19500;AT5G19510;AT5G19520;AT5G19530;AT5G19540;AT5G19550;AT5G19560;AT5G19570;AT5G19580;AT5G19590;AT5G19600;AT5G19610;AT5G19620;AT5G19630;AT5G19640;AT5G19650;AT5G19660;AT5G19670;AT5G19680;AT5G19690;AT5G19700;AT5G19710;AT5G19720;AT5G19729;AT5G19730;AT5G19740;AT5G19750;AT5G19760;AT5G19770;AT5G19780;AT5G19790;AT5G19800;AT5G19810;AT5G19820;AT5G19830…
ONT.7457.26	AT2G32430;AT2G32440;AT2G32450;AT2G32460;AT2G32470;AT2G32480;AT2G32487;AT2G32500;AT2G32510;AT2G32520;AT2G32530;AT2G32540;AT2G32550;AT2G32560;AT2G32580;AT2G32590;AT2G32600;AT2G32610;AT2G32620;AT2G32630;AT2G32640;AT2G32645;AT2G32650;AT2G32660;AT2G32670;AT2G32680;AT2G32700;AT2G32710;AT2G32720;AT2G32730;AT2G32740;AT2G32750;AT2G32760;AT2G32765;AT2G32770;AT2G32780;AT2G32785;AT2G32788;AT2G32790;AT2G32800…
ONT.8771.5	AT2G28671;AT3G16800;AT3G16810;AT3G16820;AT3G16830;AT3G16840;AT3G16850;AT3G16851;AT3G16857;AT3G16860;AT3G16870;AT3G16880;AT3G16890;AT3G16895;AT3G16900;AT3G16910;AT3G16920;AT3G16930;AT3G16940;AT3G16950;AT3G16960;AT3G16970;AT3G16980;AT3G16990;AT3G17000;AT3G17010;AT3G17020;AT3G17030;AT3G17040;AT3G17060;AT3G17070;AT3G17080;AT3G17090;AT3G17100;AT3G17120;AT3G17130;AT3G17140;AT3G17150;AT3G17152;AT3G17155…
ONT.2770.38	AT1G04890;AT1G04900;AT1G04910;AT1G04920;AT1G04930;AT1G04940;AT1G04945;AT1G04950;AT1G04960;AT1G04970;AT1G04980;AT1G04985;AT1G04990;AT1G05000;AT1G05010;AT1G05020;AT1G05030;AT1G05040;AT1G05055;AT1G05060;AT1G05065;AT1G05070;AT1G05080;AT1G05085;AT1G05090;AT1G05100;AT1G05120;AT1G05136;AT1G05140;AT1G05150;AT1G05160;AT1G05170;AT1G05180;AT1G05190;AT1G05200;AT1G05205;AT1G05210;AT1G05220;AT1G05230;AT1G05240…
ONT.19367.1	AT5G65200;AT5G65205;AT5G65207;AT5G65210;AT5G65220;AT5G65230;AT5G65240;AT5G65250;AT5G65260;AT5G65270;AT5G65274;AT5G65280;AT5G65290;AT5G65300;AT5G65310;AT5G65320;AT5G65330;AT5G65340;AT5G65350;AT5G65360;AT5G65370;AT5G65380;AT5G65390;AT5G65400;AT5G65410;AT5G65420;AT5G65430;AT5G65440;AT5G65450;AT5G65460;AT5G65470;AT5G65480;AT5G65490;AT5G65495;AT5G65500;AT5G65510;AT5G65520;AT5G65530;AT5G65533;AT5G65540…
ONT.4293.5	AT1G58340;AT1G58350;AT1G58360;AT1G58370;AT1G58380;AT1G58390;AT1G58400;AT1G58410;AT1G58420;AT1G58430;AT1G58440;AT1G58450;AT1G58460;AT1G58470;AT1G58520;AT1G58602;AT1G58643;AT1G58684;AT1G58725;AT1G58766;AT1G58807;AT1G58848;AT1G58936;AT1G58983;AT1G59030;AT1G59077;AT1G59124;AT1G59171;AT1G59218;AT1G59312;AT1G59359
ONT.5270.1	AT2G05294;AT2G05310;AT2G05320;AT2G05330;AT2G05335;AT2G05350;AT2G05360;AT2G05370;AT2G05380;AT2G05400;AT2G05410;AT2G05420;AT2G05430;AT2G05440;AT2G05500;AT2G05510;AT2G05520;AT2G05530;AT2G05540;AT2G05580;AT2G05590;AT2G05600;AT2G05620;AT2G05630;AT2G05632;AT2G05635;AT2G05642;AT2G05645;ONT.5264;ONT.5265
ONT.3687.3	AT1G29120;AT1G29140;AT1G29150;AT1G29160;AT1G29170;AT1G29179;AT1G29180;AT1G29195;AT1G29200;AT1G29220;AT1G29230;AT1G29240;AT1G29250;AT1G29260;AT1G29270;AT1G29280;AT1G29290;AT1G29300;AT1G29310;AT1G29320;AT1G29330;AT1G29340;AT1G29350;AT1G29355;AT1G29370;AT1G29380;AT1G29390;AT1G29395;AT1G29400;AT1G29410;AT1G29418;AT1G29420;AT1G29430;AT1G29440;AT1G29450;AT1G29460;AT1G29465;AT1G29470;AT1G29480;AT1G29490…
ONT.8952.1	AT3G20950;AT3G20960;AT3G20966;AT3G20970;AT3G20980;AT3G20993;AT3G20997;AT3G21000;AT3G21055;AT3G21060;AT3G21070;AT3G21080;AT3G21090;AT3G21100;AT3G21110;AT3G21120;AT3G21130;AT3G21140;AT3G21150;AT3G21160;AT3G21170;AT3G21175;AT3G21180;AT3G21190;AT3G21200;AT3G21210;AT3G21215;AT3G21220;AT3G21230;AT3G21240;AT3G21250;AT3G21260;AT3G21270;AT3G21280;AT3G21290;AT3G21295;AT3G21300;AT3G21310;AT3G21320;AT3G21330…
ONT.2770.4	AT1G04890;AT1G04900;AT1G04910;AT1G04920;AT1G04930;AT1G04940;AT1G04945;AT1G04950;AT1G04960;AT1G04970;AT1G04980;AT1G04985;AT1G04990;AT1G05000;AT1G05010;AT1G05020;AT1G05030;AT1G05040;AT1G05055;AT1G05060;AT1G05065;AT1G05070;AT1G05080;AT1G05085;AT1G05090;AT1G05100;AT1G05120;AT1G05136;AT1G05140;AT1G05150;AT1G05160;AT1G05170;AT1G05180;AT1G05190;AT1G05200;AT1G05205;AT1G05210;AT1G05220;AT1G05230;AT1G05240…
ONT.9388.1	AT3G46970;AT3G46980;AT3G46990;AT3G47000;AT3G47010;AT3G47020;AT3G47030;AT3G47040;AT3G47050;AT3G47060;AT3G47070;AT3G47080;AT3G47090;AT3G47100;AT3G47110;AT3G47120;AT3G47130;AT3G47140;AT3G47150;AT3G47160;AT3G47170;AT3G47180;AT3G47190;AT3G47200;AT3G47210;AT3G47220;AT3G47250;AT3G47290;AT3G47295;AT3G47300;AT3G47340;AT3G47341;AT3G47350;AT3G47360;AT3G47370;AT3G47380;AT3G47390;AT3G47400;AT3G47410;AT3G47420…
ONT.6104.69	AT2G35890;AT2G35900;AT2G35910;AT2G35920;AT2G35930;AT2G35940;AT2G35950;AT2G35960;AT2G35970;AT2G35980;AT2G35990;AT2G36000;AT2G36010;AT2G36020;AT2G36026;AT2G36030;AT2G36050;AT2G36053;AT2G36060;AT2G36070;AT2G36080;AT2G36090;AT2G36100;AT2G36110;AT2G36130;AT2G36145;AT2G36160;AT2G36170;AT2G36180;AT2G36190;AT2G36200;AT2G36210;AT2G36220;AT2G36230;AT2G36240;AT2G36250;AT2G36255;AT2G36260;AT2G36261;AT2G36270…
ONT.15963.1	AT5G27570;AT5G27580;AT5G27600;AT5G27606;AT5G27610;AT5G27620;AT5G27630;AT5G27640;AT5G27650;AT5G27660;AT5G27670;AT5G27680;AT5G27690;AT5G27700;AT5G27710;AT5G27720;AT5G27730;AT5G27740;AT5G27750;AT5G27760;AT5G27770;AT5G27780;AT5G27790;AT5G27800;AT5G27810;AT5G27820;AT5G27830;AT5G27840;AT5G27850;AT5G27860;AT5G27870;AT5G27880;AT5G27889;AT5G27890;ONT.15958
ONT.2770.39	AT1G04890;AT1G04900;AT1G04910;AT1G04920;AT1G04930;AT1G04940;AT1G04945;AT1G04950;AT1G04960;AT1G04970;AT1G04980;AT1G04985;AT1G04990;AT1G05000;AT1G05010;AT1G05020;AT1G05030;AT1G05040;AT1G05055;AT1G05060;AT1G05065;AT1G05070;AT1G05080;AT1G05085;AT1G05090;AT1G05100;AT1G05120;AT1G05136;AT1G05140;AT1G05150;AT1G05160;AT1G05170;AT1G05180;AT1G05190;AT1G05200;AT1G05205;AT1G05210;AT1G05220;AT1G05230;AT1G05240…
ONT.16234.1	AT5G42400;AT5G42405;AT5G42410;AT5G42420;AT5G42430;AT5G42440;AT5G42450;AT5G42460;AT5G42470;AT5G42480;AT5G42490;AT5G42500;AT5G42504;AT5G42510;AT5G42520;AT5G42530;AT5G42540;AT5G42560;AT5G42567;AT5G42570;AT5G42580;AT5G42590;AT5G42591;AT5G42600;AT5G42610;AT5G42620;AT5G42630;AT5G42635;AT5G42640;AT5G42650;AT5G42655;AT5G42660;AT5G42670;AT5G42680;AT5G42690;AT5G42700;AT5G42710;AT5G42720;AT5G42740;AT5G42750…
ONT.3200.3	AT1G14860;AT1G14870;AT1G14880;AT1G14890;AT1G14900;AT1G14910;AT1G14920;AT1G14930;AT1G14940;AT1G14950;AT1G14960;AT1G14970;AT1G14980;AT1G14990;AT1G15000;AT1G15010;AT1G15015;AT1G15020;AT1G15030;AT1G15040;AT1G15045;AT1G15050;AT1G15060;AT1G15080;AT1G15100;AT1G15110;AT1G15120;AT1G15125;AT1G15130;AT1G15140;AT1G15150;AT1G15160;AT1G15165;AT1G15170;AT1G15180;AT1G15190;AT1G15200;AT1G15210;AT1G15215;AT1G15220…
ONT.12195.6	AT4G07515;AT4G07524;AT4G07526
ONT.4240.1	AT1G55950;AT1G55960;AT1G55970;AT1G55980;AT1G55990;AT1G56000;AT1G56010;AT1G56020;AT1G56030;AT1G56040;AT1G56045;AT1G56050;AT1G56060;AT1G56070;AT1G56080;AT1G56085;AT1G56090;AT1G56100;AT1G56110;AT1G56120;AT1G56130;AT1G56140;AT1G56145;AT1G56150;AT1G56160;AT1G56170;AT1G56180;AT1G56190;AT1G56200;AT1G56210;AT1G56220;AT1G56230;AT1G56233;AT1G56240;AT1G56250;AT1G56260;AT1G56270;AT1G56280;AT1G56290;AT1G56300…
ONT.3905.1	AT1G43770;AT1G43780;AT1G43790;AT1G43800;AT1G43810;AT1G43850;AT1G43860;AT1G43890;AT1G43900;AT1G43910;AT1G43950;AT1G43970;AT1G43980;AT1G44000;AT1G44010;AT1G44020;AT1G44030;AT1G44050;ONT.3903
ONT.2000.4	AT1G66245;AT1G66250;AT1G66260;AT1G66270;AT1G66280;AT1G66290;AT1G66300;AT1G66310;AT1G66320;AT1G66330;AT1G66340;AT1G66345;AT1G66350;AT1G66360;AT1G66370;AT1G66380;AT1G66390;AT1G66400;AT1G66410;AT1G66420;AT1G66430;AT1G66440;AT1G66450;AT1G66460;AT1G66470;AT1G66475;AT1G66480;AT1G66490;AT1G66500;AT1G66510;AT1G66520;AT1G66530;AT1G66540;AT1G66550;AT1G66553;AT1G66560;AT1G66570;AT1G66580;AT1G66590;AT1G66600…
ONT.4293.4	AT1G58340;AT1G58350;AT1G58360;AT1G58370;AT1G58380;AT1G58390;AT1G58400;AT1G58410;AT1G58420;AT1G58430;AT1G58440;AT1G58450;AT1G58460;AT1G58470;AT1G58520;AT1G58602;AT1G58643;AT1G58684;AT1G58725;AT1G58766;AT1G58807;AT1G58848;AT1G58936;AT1G58983;AT1G59030;AT1G59077;AT1G59124;AT1G59171;AT1G59218;AT1G59312;AT1G59359
ONT.6104.16	AT2G35890;AT2G35900;AT2G35910;AT2G35920;AT2G35930;AT2G35940;AT2G35950;AT2G35960;AT2G35970;AT2G35980;AT2G35990;AT2G36000;AT2G36010;AT2G36020;AT2G36026;AT2G36030;AT2G36050;AT2G36053;AT2G36060;AT2G36070;AT2G36080;AT2G36090;AT2G36100;AT2G36110;AT2G36130;AT2G36145;AT2G36160;AT2G36170;AT2G36180;AT2G36190;AT2G36200;AT2G36210;AT2G36220;AT2G36230;AT2G36240;AT2G36250;AT2G36255;AT2G36260;AT2G36261;AT2G36270…
ONT.4146.2	AT1G53390;AT1G53400;AT1G53420;AT1G53430;AT1G53440;AT1G53450;AT1G53460;AT1G53470;AT1G53480;AT1G53490;AT1G53500;AT1G53510;AT1G53520;AT1G53530;AT1G53540;AT1G53541;AT1G53542;AT1G53543;AT1G53550;AT1G53560;AT1G53570;AT1G53580;AT1G53590;AT1G53600;AT1G53610;AT1G53620;AT1G53633;AT1G53635;AT1G53640;AT1G53645;AT1G53650;AT1G53660;AT1G53670;AT1G53680;AT1G53690;AT1G53700;AT1G53705;AT1G53708;AT1G53710;AT1G53720…
ONT.2264.1	AT1G72550;AT1G72560;AT1G72570;AT1G72580;AT1G72590;AT1G72600;AT1G72610;AT1G72620;AT1G72630;AT1G72640;AT1G72645;AT1G72650;AT1G72660;AT1G72670;AT1G72680;AT1G72690;AT1G72700;AT1G72710;AT1G72720;AT1G72730;AT1G72740;AT1G72750;AT1G72760;AT1G72770;AT1G72790;AT1G72800;AT1G72810;AT1G72820;AT1G72830;AT1G72840;AT1G72850;AT1G72860;AT1G72870;AT1G72880;AT1G72890;AT1G72900;AT1G72910;AT1G72920;AT1G72930;AT1G72940…
ONT.6764.2	AT2G05440;AT2G05500;AT2G05510;AT2G05520;AT2G05530;AT2G05540;AT2G05580;AT2G05590;AT2G05600;AT2G05620;AT2G05630;AT2G05635;AT2G05642;AT2G05645;AT2G05710;AT2G05720;AT2G05752;AT2G05753;AT2G05755;AT2G05760;ONT.6765
ONT.12047.1	AT4G01440;AT4G01450;AT4G01460;AT4G01470;AT4G01480;AT4G01500;AT4G01510;AT4G01516;AT4G01520;AT4G01535;AT4G01540;AT4G01550;AT4G01560;AT4G01570;AT4G01575;AT4G01580;AT4G01590;AT4G01595;AT4G01600;AT4G01610;AT4G01630;AT4G01640;AT4G01650;AT4G01660;AT4G01670;AT4G01671;AT4G01680;AT4G01690;AT4G01700;AT4G01703;AT4G01710;AT4G01720;AT4G01730;AT4G01735;AT4G01740;AT4G01750;AT4G01760;AT4G01770;AT4G01780;AT4G01790…
ONT.6104.20	AT2G35890;AT2G35900;AT2G35910;AT2G35920;AT2G35930;AT2G35940;AT2G35950;AT2G35960;AT2G35970;AT2G35980;AT2G35990;AT2G36000;AT2G36010;AT2G36020;AT2G36026;AT2G36030;AT2G36050;AT2G36053;AT2G36060;AT2G36070;AT2G36080;AT2G36090;AT2G36100;AT2G36110;AT2G36130;AT2G36145;AT2G36160;AT2G36170;AT2G36180;AT2G36190;AT2G36200;AT2G36210;AT2G36220;AT2G36230;AT2G36240;AT2G36250;AT2G36255;AT2G36260;AT2G36261;AT2G36270…
ONT.3886.3	AT1G36510;AT1G36580;AT1G36622;AT1G36640;AT1G36675;AT1G36730;AT1G36745;AT1G36756
ONT.8771.8	AT1G31630;AT1G48620;AT2G28671;AT3G16800;AT3G16810;AT3G16820;AT3G16830;AT3G16840;AT3G16850;AT3G16851;AT3G16857;AT3G16860;AT3G16870;AT3G16880;AT3G16890;AT3G16895;AT3G16900;AT3G16910;AT3G16920;AT3G16930;AT3G16940;AT3G16950;AT3G16960;AT3G16970;AT3G16980;AT3G16990;AT3G17000;AT3G17010;AT3G17020;AT3G17030;AT3G17040;AT3G17060;AT3G17070;AT3G17080;AT3G17090;AT3G17100;AT3G17120;AT3G17130;AT3G17140;AT3G17150…
ONT.7834.1	AT2G41300;AT2G41310;AT2G41330;AT2G41340;AT2G41342;AT2G41350;AT2G41360;AT2G41370;AT2G41380;AT2G41390;AT2G41400;AT2G41410;AT2G41415;AT2G41420;AT2G41430;AT2G41440;AT2G41445;AT2G41450;AT2G41451;AT2G41460;AT2G41470;AT2G41473;AT2G41475;AT2G41480;AT2G41490;AT2G41500;AT2G41520;AT2G41530;AT2G41540;AT2G41550;AT2G41560;AT2G41590;AT2G41600;AT2G41610;AT2G41620;AT2G41630;AT2G41640;AT2G41650;AT2G41660;AT2G41670…
ONT.7457.32	AT2G32430;AT2G32440;AT2G32450;AT2G32460;AT2G32470;AT2G32480;AT2G32487;AT2G32500;AT2G32510;AT2G32520;AT2G32530;AT2G32540;AT2G32550;AT2G32560;AT2G32580;AT2G32590;AT2G32600;AT2G32610;AT2G32620;AT2G32630;AT2G32640;AT2G32645;AT2G32650;AT2G32660;AT2G32670;AT2G32680;AT2G32700;AT2G32710;AT2G32720;AT2G32730;AT2G32740;AT2G32750;AT2G32760;AT2G32765;AT2G32770;AT2G32780;AT2G32785;AT2G32788;AT2G32790;AT2G32800…
ONT.10166.1	AT3G03900;AT3G03910;AT3G03920;AT3G03930;AT3G03940;AT3G03950;AT3G03960;AT3G03970;AT3G03980;AT3G03990;AT3G04000;AT3G04010;AT3G04020;AT3G04030;AT3G04040;AT3G04050;AT3G04060;AT3G04070;AT3G04080;AT3G04090;AT3G04100;AT3G04110;AT3G04120;AT3G04130;AT3G04140;AT3G04150;AT3G04160;AT3G04170;AT3G04180;AT3G04181;AT3G04190;AT3G04200;AT3G04210;AT3G04220;AT3G04230;AT3G04240;AT3G04250;AT3G04260;AT3G04270;AT3G04280…
ONT.12195.11	AT4G07515;AT4G07524;AT4G07526
ONT.9289.1	AT3G41762;AT3G42050;AT3G42060;AT3G42130;AT3G42140;AT3G42148;AT3G42150;AT3G42155;AT3G42160;AT3G42170;AT3G42180;ONT.9285;ONT.9286;ONT.9287;ONT.9288
ONT.19449.1	AT5G65580;AT5G65610;AT5G66950;AT5G66960;AT5G66970;AT5G66980;AT5G66985;AT5G66990;AT5G67000;AT5G67010;AT5G67020;AT5G67030;AT5G67040;AT5G67050;AT5G67060;AT5G67070;AT5G67080;AT5G67090;AT5G67100;AT5G67110;AT5G67120;AT5G67130;AT5G67140;AT5G67150;AT5G67160;AT5G67170;AT5G67180;AT5G67190;AT5G67200;AT5G67210;AT5G67220;AT5G67230;AT5G67240;AT5G67250;AT5G67260;AT5G67265;AT5G67270;AT5G67280;AT5G67290;AT5G67300…
ONT.2000.5	AT1G66245;AT1G66250;AT1G66260;AT1G66270;AT1G66280;AT1G66290;AT1G66300;AT1G66310;AT1G66320;AT1G66330;AT1G66340;AT1G66345;AT1G66350;AT1G66360;AT1G66370;AT1G66380;AT1G66390;AT1G66400;AT1G66410;AT1G66420;AT1G66430;AT1G66440;AT1G66450;AT1G66460;AT1G66470;AT1G66475;AT1G66480;AT1G66490;AT1G66500;AT1G66510;AT1G66520;AT1G66530;AT1G66540;AT1G66550;AT1G66553;AT1G66560;AT1G66570;AT1G66580;AT1G66590;AT1G66600…
ONT.16626.3	AT5G52830;AT5G52840;AT5G52850;AT5G52860;AT5G52870;AT5G52880;AT5G52882;AT5G52890;AT5G52900;AT5G52901;AT5G52910;AT5G52920;AT5G52930;AT5G52940;AT5G52950;AT5G52960;AT5G52965;AT5G52970;AT5G52975;AT5G52980;AT5G52990;AT5G53000;AT5G53010;AT5G53020;AT5G53030;AT5G53040;AT5G53045;AT5G53050;AT5G53060;AT5G53070;AT5G53080;AT5G53090;AT5G53100;AT5G53110;AT5G53120;AT5G53130;AT5G53140;AT5G53144;AT5G53150;AT5G53160…
ONT.7753.1	AT2G39370;AT2G39380;AT2G39390;AT2G39400;AT2G39410;AT2G39415;AT2G39420;AT2G39430;AT2G39435;AT2G39440;AT2G39445;AT2G39450;AT2G39460;AT2G39470;AT2G39480;AT2G39490;AT2G39500;AT2G39510;AT2G39518;AT2G39520;AT2G39530;AT2G39540;AT2G39550;AT2G39560;AT2G39570;AT2G39580;AT2G39590;AT2G39620;AT2G39630;AT2G39640;AT2G39650;AT2G39660;AT2G39670;AT2G39690;AT2G39700;AT2G39705;AT2G39710;AT2G39720;AT2G39725;AT2G39730…
ONT.2770.18	AT1G04890;AT1G04900;AT1G04910;AT1G04920;AT1G04930;AT1G04940;AT1G04945;AT1G04950;AT1G04960;AT1G04970;AT1G04980;AT1G04985;AT1G04990;AT1G05000;AT1G05010;AT1G05020;AT1G05030;AT1G05040;AT1G05055;AT1G05060;AT1G05065;AT1G05070;AT1G05080;AT1G05085;AT1G05090;AT1G05100;AT1G05120;AT1G05136;AT1G05140;AT1G05150;AT1G05160;AT1G05170;AT1G05180;AT1G05190;AT1G05200;AT1G05205;AT1G05210;AT1G05220;AT1G05230;AT1G05240…
ONT.1312.3	AT1G35467;AT1G35470;AT1G35490;AT1G35500;AT1G35510;AT1G35515;AT1G35516;AT1G35520;AT1G35530;AT1G35537;AT1G35540;AT1G35550;AT1G35560;AT1G35580;AT1G35610;AT1G35614;AT1G35617;AT1G35620;AT1G35625;AT1G35630;AT1G35660;AT1G35670;AT1G35680;AT1G35710;AT1G35720;AT1G35730;ONT.1311
ONT.6104.28	AT2G35890;AT2G35900;AT2G35910;AT2G35920;AT2G35930;AT2G35940;AT2G35950;AT2G35960;AT2G35970;AT2G35980;AT2G35990;AT2G36000;AT2G36010;AT2G36020;AT2G36026;AT2G36030;AT2G36050;AT2G36053;AT2G36060;AT2G36070;AT2G36080;AT2G36090;AT2G36100;AT2G36110;AT2G36130;AT2G36145;AT2G36160;AT2G36170;AT2G36180;AT2G36190;AT2G36200;AT2G36210;AT2G36220;AT2G36230;AT2G36240;AT2G36250;AT2G36255;AT2G36260;AT2G36261;AT2G36270…
ONT.7846.1	AT2G41510;AT2G41520;AT2G41530;AT2G41540;AT2G41550;AT2G41560;AT2G41590;AT2G41600;AT2G41610;AT2G41620;AT2G41630;AT2G41640;AT2G41650;AT2G41660;AT2G41670;AT2G41680;AT2G41690;AT2G41700;AT2G41705;AT2G41710;AT2G41720;AT2G41730;AT2G41740;AT2G41750;AT2G41760;AT2G41770;AT2G41780;AT2G41790;AT2G41800;AT2G41810;AT2G41820;AT2G41830;AT2G41835;AT2G41840;AT2G41850;AT2G41860;AT2G41870;AT2G41880;AT2G41890;AT2G41900…
ONT.17888.1	AT5G17690;AT5G17700;AT5G17710;AT5G17720;AT5G17730;AT5G17740;AT5G17750;AT5G17760;AT5G17770;AT5G17780;AT5G17790;AT5G17795;AT5G17800;AT5G17810;AT5G17820;AT5G17830;AT5G17840;AT5G17847;AT5G17850;AT5G17860;AT5G17870;AT5G17880;AT5G17890;AT5G17900;AT5G17910;AT5G17920;AT5G17930;AT5G17950;AT5G17960;AT5G17970;AT5G17980;AT5G17990;AT5G18000;AT5G18010;AT5G18020;AT5G18030;AT5G18037;AT5G18040;AT5G18050;AT5G18060…
ONT.4216.2	AT1G55450;AT1G55460;AT1G55475;AT1G55480;AT1G55490;AT1G55500;AT1G55510;AT1G55520;AT1G55530;AT1G55535;AT1G55540;AT1G55546;AT1G55550;AT1G55560;AT1G55570;AT1G55580;AT1G55590;AT1G55600;AT1G55610;AT1G55615;AT1G55620;AT1G55630;AT1G55640;AT1G55650;AT1G55660;AT1G55670;AT1G55680;AT1G55690;AT1G55700;AT1G55710;AT1G55720;AT1G55730;AT1G55740;AT1G55750;AT1G55760;AT1G55770;AT1G55790;AT1G55800;AT1G55805;AT1G55810…
ONT.2698.4	AT1G03230;AT1G03240;AT1G03250;AT1G03260;AT1G03270;AT1G03280;AT1G03290;AT1G03300;AT1G03310;AT1G03320;AT1G03330;AT1G03340;AT1G03350;AT1G03360;AT1G03365;AT1G03370;AT1G03380;AT1G03390;AT1G03400;AT1G03410;AT1G03430;AT1G03440;AT1G03445;AT1G03457;AT1G03470;AT1G03475;AT1G03490;AT1G03495;AT1G03510;AT1G03520;AT1G03530;AT1G03540;AT1G03560;AT1G03590;AT1G03600;AT1G03610;AT1G03620;AT1G03630;AT1G03650;AT1G03660…
ONT.7457.46	AT2G32430;AT2G32440;AT2G32450;AT2G32460;AT2G32470;AT2G32480;AT2G32487;AT2G32500;AT2G32510;AT2G32520;AT2G32530;AT2G32540;AT2G32550;AT2G32560;AT2G32580;AT2G32590;AT2G32600;AT2G32610;AT2G32620;AT2G32630;AT2G32640;AT2G32645;AT2G32650;AT2G32660;AT2G32670;AT2G32680;AT2G32700;AT2G32710;AT2G32720;AT2G32730;AT2G32740;AT2G32750;AT2G32760;AT2G32765;AT2G32770;AT2G32780;AT2G32785;AT2G32788;AT2G32790;AT2G32800…
ONT.7457.33	AT2G32430;AT2G32440;AT2G32450;AT2G32460;AT2G32470;AT2G32480;AT2G32487;AT2G32500;AT2G32510;AT2G32520;AT2G32530;AT2G32540;AT2G32550;AT2G32560;AT2G32580;AT2G32590;AT2G32600;AT2G32610;AT2G32620;AT2G32630;AT2G32640;AT2G32645;AT2G32650;AT2G32660;AT2G32670;AT2G32680;AT2G32700;AT2G32710;AT2G32720;AT2G32730;AT2G32740;AT2G32750;AT2G32760;AT2G32765;AT2G32770;AT2G32780;AT2G32785;AT2G32788;AT2G32790;AT2G32800…
ONT.137.1	AT1G04170;AT1G04171;AT1G04180;AT1G04190;AT1G04200;AT1G04210;AT1G04220;AT1G04230;AT1G04240;AT1G04250;AT1G04260;AT1G04270;AT1G04280;AT1G04290;AT1G04300;AT1G04310;AT1G04330;AT1G04340;AT1G04350;AT1G04360;AT1G04370;AT1G04380;AT1G04390;AT1G04400;AT1G04410;AT1G04420;AT1G04430;AT1G04440;AT1G04445;AT1G04450;AT1G04470;AT1G04480;AT1G04490;AT1G04500;AT1G04501;AT1G04510;AT1G04520;AT1G04530;AT1G04540;AT1G04550…
ONT.8777.2	AT3G16870;AT3G16880;AT3G16890;AT3G16895;AT3G16900;AT3G16910;AT3G16920;AT3G16930;AT3G16940;AT3G16950;AT3G16960;AT3G16970;AT3G16980;AT3G16990;AT3G17000;AT3G17010;AT3G17020;AT3G17030;AT3G17040;AT3G17060;AT3G17070;AT3G17080;AT3G17090;AT3G17100;AT3G17120;AT3G17130;AT3G17140;AT3G17150;AT3G17152;AT3G17155;AT3G17160;AT3G17170;AT3G17180;AT3G17190;AT3G17205;AT3G17210;AT3G17220;AT3G17225;AT3G17230;AT3G17240…
ONT.17330.2	AT5G03310;AT5G03320;AT5G03330;AT5G03340;AT5G03345;AT5G03350;AT5G03360;AT5G03370;AT5G03380;AT5G03390;AT5G03400;AT5G03406;AT5G03415;AT5G03420;AT5G03430;AT5G03435;AT5G03440;AT5G03450;AT5G03455;AT5G03460;AT5G03470;AT5G03480;AT5G03490;AT5G03495;AT5G03500;AT5G03510;AT5G03520;AT5G03530;AT5G03540;AT5G03545;AT5G03550;AT5G03555;AT5G03560;AT5G03570;AT5G03580;AT5G03590;AT5G03600;AT5G03610;AT5G03620;AT5G03630…
ONT.5985.1	AT2G32540;AT2G32550;AT2G32560;AT2G32580;AT2G32590;AT2G32600;AT2G32610;AT2G32620;AT2G32630;AT2G32640;AT2G32645;AT2G32650;AT2G32660;AT2G32670;AT2G32680;AT2G32690;AT2G32700;AT2G32710;AT2G32720;AT2G32730;AT2G32740;AT2G32750;AT2G32760;AT2G32765;AT2G32770;AT2G32780;AT2G32785;AT2G32788;AT2G32790;AT2G32800;AT2G32810;AT2G32820;AT2G32830;AT2G32835;AT2G32840;AT2G32850;AT2G32860;AT2G32870;AT2G32880;AT2G32885…
ONT.5178.1	AT2G02000;AT2G02010;AT2G02020;AT2G02023;AT2G02026;AT2G02030;AT2G02040;AT2G02050;AT2G02060;AT2G02061;AT2G02070;AT2G02080;AT2G02090;AT2G02100;AT2G02103;AT2G02120;AT2G02130;AT2G02140;AT2G02147;AT2G02148;AT2G02150;AT2G02160;AT2G02170;AT2G02180;AT2G02220;AT2G02230;AT2G02240;AT2G02250;AT2G02280;AT2G02290;AT2G02300;AT2G02310;AT2G02320;AT2G02340;AT2G02350;AT2G02360;AT2G02370;AT2G02380;AT2G02390;AT2G02400…
ONT.8954.2	AT3G21055;AT3G21060;AT3G21070;AT3G21080;AT3G21090;AT3G21100;AT3G21110;AT3G21120;AT3G21130;AT3G21140;AT3G21150;AT3G21160;AT3G21170;AT3G21175;AT3G21180;AT3G21190;AT3G21200;AT3G21210;AT3G21215;AT3G21220;AT3G21230;AT3G21240;AT3G21250;AT3G21260;AT3G21270;AT3G21280;AT3G21290;AT3G21295;AT3G21300;AT3G21310;AT3G21320;AT3G21330;AT3G21338;AT3G21340;AT3G21350;AT3G21351;AT3G21352;AT3G21360;AT3G21370;AT3G21371…
ONT.9606.6	AT3G52270;AT3G52280;AT3G52290;AT3G52300;AT3G52302;AT3G52310;AT3G52320;AT3G52330;AT3G52340;AT3G52350;AT3G52360;AT3G52370;AT3G52380;AT3G52390;AT3G52400;AT3G52420;AT3G52430;AT3G52440;AT3G52450;AT3G52460;AT3G52470;AT3G52480;AT3G52490;AT3G52500;AT3G52510;AT3G52520;AT3G52525;AT3G52540;AT3G52550;AT3G52560;AT3G52561;AT3G52570;AT3G52580;AT3G52590;AT3G52600;AT3G52610;AT3G52620;AT3G52630;AT3G52640;AT3G52660…
ONT.17297.1	AT5G02430;AT5G02440;AT5G02450;AT5G02460;AT5G02470;AT5G02480;AT5G02490;AT5G02500;AT5G02502;AT5G02510;AT5G02520;AT5G02530;AT5G02540;AT5G02550;AT5G02560;AT5G02570;AT5G02580;AT5G02590;AT5G02600;AT5G02610;AT5G02620;AT5G02630;AT5G02640;AT5G02650;AT5G02660;AT5G02670;AT5G02680;AT5G02690;AT5G02700;AT5G02710;AT5G02720;AT5G02730;AT5G02740;AT5G02750;AT5G02760;AT5G02770;AT5G02780;AT5G02790;AT5G02800;AT5G02810…
ONT.6104.59	AT2G35890;AT2G35900;AT2G35910;AT2G35920;AT2G35930;AT2G35940;AT2G35950;AT2G35960;AT2G35970;AT2G35980;AT2G35990;AT2G36000;AT2G36010;AT2G36020;AT2G36026;AT2G36030;AT2G36050;AT2G36053;AT2G36060;AT2G36070;AT2G36080;AT2G36090;AT2G36100;AT2G36110;AT2G36130;AT2G36145;AT2G36160;AT2G36170;AT2G36180;AT2G36190;AT2G36200;AT2G36210;AT2G36220;AT2G36230;AT2G36240;AT2G36250;AT2G36255;AT2G36260;AT2G36261;AT2G36270…
ONT.7823.4	AT2G40960;AT2G40970;AT2G40980;AT2G40990;AT2G40995;AT2G41000;AT2G41010;AT2G41020;AT2G41040;AT2G41050;AT2G41060;AT2G41070;AT2G41080;AT2G41082;AT2G41090;AT2G41100;AT2G41110;AT2G41120;AT2G41130;AT2G41140;AT2G41150;AT2G41160;AT2G41170;AT2G41180;AT2G41190;AT2G41200;AT2G41210;AT2G41220;AT2G41225;AT2G41231;AT2G41233;AT2G41240;AT2G41250;AT2G41260;AT2G41280;AT2G41290;AT2G41300;AT2G41310;AT2G41330;AT2G41340…
ONT.8954.1	AT3G21055;AT3G21060;AT3G21070;AT3G21080;AT3G21090;AT3G21100;AT3G21110;AT3G21120;AT3G21130;AT3G21140;AT3G21150;AT3G21160;AT3G21170;AT3G21175;AT3G21180;AT3G21190;AT3G21200;AT3G21210;AT3G21215;AT3G21220;AT3G21230;AT3G21240;AT3G21250;AT3G21260;AT3G21270;AT3G21280;AT3G21290;AT3G21295;AT3G21300;AT3G21310;AT3G21320;AT3G21330;AT3G21338;AT3G21340;AT3G21350;AT3G21351;AT3G21352;AT3G21360;AT3G21370;AT3G21371…
ONT.13294.1	AT4G36120;AT4G36130;AT4G36140;AT4G36150;AT4G36160;AT4G36170;AT4G36180;AT4G36190;AT4G36195;AT4G36210;AT4G36220;AT4G36230;AT4G36240;AT4G36250;AT4G36260;AT4G36268;AT4G36270;AT4G36280;AT4G36290;AT4G36350;AT4G36360;AT4G36370;AT4G36380;AT4G36390;AT4G36400;AT4G36410;AT4G36420;AT4G36430;AT4G36440;AT4G36450;AT4G36460;AT4G36470;AT4G36480;AT4G36490;AT4G36500;AT4G36510;AT4G36515;AT4G36520;AT4G36530;AT4G36540…
ONT.9163.3	AT3G26460;AT3G26470;AT3G26480;AT3G26490;AT3G26500;AT3G26510;AT3G26511;AT3G26520;AT3G26539;AT3G26540;AT3G26550;AT3G26560;AT3G26561;AT3G26570;AT3G26580;AT3G26590;AT3G26600;AT3G26610;AT3G26616;AT3G26618;AT3G26620;AT3G26630;AT3G26640;AT3G26650;AT3G26660;AT3G26670;AT3G26680;AT3G26690;AT3G26700;AT3G26710;AT3G26720;AT3G26730;AT3G26740;AT3G26742;AT3G26744;AT3G26750;AT3G26760;AT3G26770;AT3G26780;AT3G26782…
ONT.6104.2	AT2G35890;AT2G35900;AT2G35910;AT2G35920;AT2G35930;AT2G35940;AT2G35950;AT2G35960;AT2G35970;AT2G35980;AT2G35990;AT2G36000;AT2G36010;AT2G36020;AT2G36026;AT2G36030;AT2G36050;AT2G36053;AT2G36060;AT2G36070;AT2G36080;AT2G36090;AT2G36100;AT2G36110;AT2G36130;AT2G36145;AT2G36160;AT2G36170;AT2G36180;AT2G36190;AT2G36200;AT2G36210;AT2G36220;AT2G36230;AT2G36240;AT2G36250;AT2G36255;AT2G36260;AT2G36261;AT2G36270…
ONT.2770.42	AT1G04890;AT1G04900;AT1G04910;AT1G04920;AT1G04930;AT1G04940;AT1G04945;AT1G04950;AT1G04960;AT1G04970;AT1G04980;AT1G04985;AT1G04990;AT1G05000;AT1G05010;AT1G05020;AT1G05030;AT1G05040;AT1G05055;AT1G05060;AT1G05065;AT1G05070;AT1G05080;AT1G05085;AT1G05090;AT1G05100;AT1G05120;AT1G05136;AT1G05140;AT1G05150;AT1G05160;AT1G05170;AT1G05180;AT1G05190;AT1G05200;AT1G05205;AT1G05210;AT1G05220;AT1G05230;AT1G05240…
ONT.2770.35	AT1G04890;AT1G04900;AT1G04910;AT1G04920;AT1G04930;AT1G04940;AT1G04945;AT1G04950;AT1G04960;AT1G04970;AT1G04980;AT1G04985;AT1G04990;AT1G05000;AT1G05010;AT1G05020;AT1G05030;AT1G05040;AT1G05055;AT1G05060;AT1G05065;AT1G05070;AT1G05080;AT1G05085;AT1G05090;AT1G05100;AT1G05120;AT1G05136;AT1G05140;AT1G05150;AT1G05160;AT1G05170;AT1G05180;AT1G05190;AT1G05200;AT1G05205;AT1G05210;AT1G05220;AT1G05230;AT1G05240…
ONT.2770.8	AT1G04890;AT1G04900;AT1G04910;AT1G04920;AT1G04930;AT1G04940;AT1G04945;AT1G04950;AT1G04960;AT1G04970;AT1G04980;AT1G04985;AT1G04990;AT1G05000;AT1G05010;AT1G05020;AT1G05030;AT1G05040;AT1G05055;AT1G05060;AT1G05065;AT1G05070;AT1G05080;AT1G05085;AT1G05090;AT1G05100;AT1G05120;AT1G05136;AT1G05140;AT1G05150;AT1G05160;AT1G05170;AT1G05180;AT1G05190;AT1G05200;AT1G05205;AT1G05210;AT1G05220;AT1G05230;AT1G05240…
ONT.6451.1	AT2G44130;AT2G44140;AT2G44150;AT2G44160;AT2G44175;AT2G44180;AT2G44190;AT2G44195;AT2G44198;AT2G44200;AT2G44210;AT2G44220;AT2G44230;AT2G44240;AT2G44250;AT2G44260;AT2G44270;AT2G44280;AT2G44290;AT2G44300;AT2G44304;AT2G44310;AT2G44330;AT2G44340;AT2G44350;AT2G44360;AT2G44370;AT2G44380;AT2G44390;AT2G44400;AT2G44410;AT2G44420;AT2G44430;AT2G44440;AT2G44450;AT2G44460;AT2G44470;AT2G44480;AT2G44490;AT2G44500…
ONT.4663.1	AT1G69370;AT1G69380;AT1G69390;AT1G69400;AT1G69410;AT1G69420;AT1G69430;AT1G69440;AT1G69450;AT1G69460;AT1G69470;AT1G69480;AT1G69485;AT1G69490;AT1G69500;AT1G69510;AT1G69520;AT1G69523;AT1G69526;AT1G69530;AT1G69540;AT1G69550;AT1G69560;AT1G69570;AT1G69580;AT1G69600;AT1G69610;AT1G69620;AT1G69630;AT1G69640;AT1G69650;AT1G69660;AT1G69670;AT1G69680;AT1G69690;AT1G69700;AT1G69710;AT1G69720;AT1G69730;AT1G69740…
ONT.975.1	AT1G24793;AT1G24800;AT1G24807;AT1G24822;AT1G24851;AT1G24880;AT1G24881;AT1G24909;AT1G24996;AT1G25025;AT1G25054;AT1G25055;AT1G25083;AT1G25097;AT1G25112;AT1G25141;AT1G25145;AT1G25150;AT1G25155;AT1G25180;AT1G25210;AT1G25211;AT1G25220;AT1G25230;AT1G25240;AT1G25250;AT1G25260;AT1G25270;AT1G25275;AT1G25280;AT1G25290;AT1G25300;AT1G25310;AT1G25320;AT1G25330;AT1G25340;AT1G25350;AT1G25360;AT1G25370;AT1G25375…
ONT.2770.40	AT1G04890;AT1G04900;AT1G04910;AT1G04920;AT1G04930;AT1G04940;AT1G04945;AT1G04950;AT1G04960;AT1G04970;AT1G04980;AT1G04985;AT1G04990;AT1G05000;AT1G05010;AT1G05020;AT1G05030;AT1G05040;AT1G05055;AT1G05060;AT1G05065;AT1G05070;AT1G05080;AT1G05085;AT1G05090;AT1G05100;AT1G05120;AT1G05136;AT1G05140;AT1G05150;AT1G05160;AT1G05170;AT1G05180;AT1G05190;AT1G05200;AT1G05205;AT1G05210;AT1G05220;AT1G05230;AT1G05240…
ONT.18856.1	AT5G51800;AT5G51810;AT5G51812;AT5G51820;AT5G51830;AT5G51840;AT5G51845;AT5G51850;AT5G51860;AT5G51870;AT5G51880;AT5G51890;AT5G51900;AT5G51910;AT5G51920;AT5G51930;AT5G51940;AT5G51950;AT5G51960;AT5G51970;AT5G51980;AT5G51990;AT5G52000;AT5G52010;AT5G52020;AT5G52030;AT5G52040;AT5G52050;AT5G52060;AT5G52070;AT5G52080;AT5G52090;AT5G52100;AT5G52110;AT5G52120;AT5G52130;AT5G52140;AT5G52150;AT5G52160;AT5G52170…
ONT.7457.28	AT2G32430;AT2G32440;AT2G32450;AT2G32460;AT2G32470;AT2G32480;AT2G32487;AT2G32500;AT2G32510;AT2G32520;AT2G32530;AT2G32540;AT2G32550;AT2G32560;AT2G32580;AT2G32590;AT2G32600;AT2G32610;AT2G32620;AT2G32630;AT2G32640;AT2G32645;AT2G32650;AT2G32660;AT2G32670;AT2G32680;AT2G32700;AT2G32710;AT2G32720;AT2G32730;AT2G32740;AT2G32750;AT2G32760;AT2G32765;AT2G32770;AT2G32780;AT2G32785;AT2G32788;AT2G32790;AT2G32800…
ONT.12195.10	AT4G07515;AT4G07524;AT4G07526
ONT.6921.1	AT2G18160;AT2G18170;AT2G18180;AT2G18190;AT2G18193;AT2G18196;AT2G18200;AT2G18210;AT2G18220;AT2G18230;AT2G18240;AT2G18245;AT2G18250;AT2G18260;AT2G18270;AT2G18280;AT2G18290;AT2G18300;AT2G18320;AT2G18328;AT2G18330;AT2G18340;AT2G18350;AT2G18360;AT2G18370;AT2G18380;AT2G18390;AT2G18400;AT2G18410;AT2G18420;AT2G18450;AT2G18460;AT2G18465;AT2G18470;AT2G18480;AT2G18490;AT2G18500;AT2G18510;AT2G18520;AT2G18530…
ONT.6104.67	AT2G35890;AT2G35900;AT2G35910;AT2G35920;AT2G35930;AT2G35940;AT2G35950;AT2G35960;AT2G35970;AT2G35980;AT2G35990;AT2G36000;AT2G36010;AT2G36020;AT2G36026;AT2G36030;AT2G36050;AT2G36053;AT2G36060;AT2G36070;AT2G36080;AT2G36090;AT2G36100;AT2G36110;AT2G36130;AT2G36145;AT2G36160;AT2G36170;AT2G36180;AT2G36190;AT2G36200;AT2G36210;AT2G36220;AT2G36230;AT2G36240;AT2G36250;AT2G36255;AT2G36260;AT2G36261;AT2G36270…
ONT.8217.1	AT3G03305;AT3G03310;AT3G03320;AT3G03330;AT3G03340;AT3G03341;AT3G03350;AT3G03360;AT3G03370;AT3G03380;AT3G03400;AT3G03405;AT3G03410;AT3G03420;AT3G03430;AT3G03440;AT3G03450;AT3G03456;AT3G03460;AT3G03470;AT3G03480;AT3G03490;AT3G03500;AT3G03510;AT3G03520;AT3G03530;AT3G03540;AT3G03550;AT3G03560;AT3G03570;AT3G03580;AT3G03590;AT3G03600;AT3G03610;AT3G03620;AT3G03626;AT3G03630;AT3G03640;AT3G03650;AT3G03660…
ONT.8643.1	AT1G53830;AT3G14110;AT3G14120;AT3G14130;AT3G14140;AT3G14150;AT3G14160;AT3G14170;AT3G14172;AT3G14180;AT3G14190;AT3G14200;AT3G14205;AT3G14210;AT3G14220;AT3G14225;AT3G14230;AT3G14240;AT3G14250;AT3G14260;AT3G14270;AT3G14280;AT3G14290;AT3G14300;AT3G14310;AT3G14320;AT3G14330;AT3G14340;AT3G14350;AT3G14360;AT3G14362;AT3G14370;AT3G14380;AT3G14390;AT3G14395;AT3G14400;AT3G14410;AT3G14415;AT3G14420;AT3G14430…
ONT.11840.1	AT3G59770;AT3G59780;AT3G59790;AT3G59800;AT3G59810;AT3G59820;AT3G59830;AT3G59840;AT3G59845;AT3G59850;AT3G59870;AT3G59880;AT3G59890;AT3G59900;AT3G59910;AT3G59920;AT3G59930;AT3G59940;AT3G59950;AT3G59960;AT3G59970;AT3G59980;AT3G59990;AT3G60000;AT3G60010;AT3G60020;AT3G60030;AT3G60040;AT3G60050;AT3G60060;AT3G60070;AT3G60080;AT3G60090;AT3G60100;AT3G60110;AT3G60120;AT3G60130;AT3G60140;AT3G60150;AT3G60160…
ONT.4548.2	AT1G66510;AT1G66520;AT1G66530;AT1G66540;AT1G66550;AT1G66553;AT1G66560;AT1G66570;AT1G66580;AT1G66590;AT1G66600;AT1G66610;AT1G66620;AT1G66630;AT1G66640;AT1G66650;AT1G66660;AT1G66670;AT1G66680;AT1G66690;AT1G66700;AT1G66720;AT1G66730;AT1G66740;AT1G66750;AT1G66760;AT1G66770;AT1G66780;AT1G66790;AT1G66800;AT1G66810;AT1G66820;AT1G66830;AT1G66840;AT1G66850;AT1G66852;AT1G66855;AT1G66860;AT1G66870;AT1G66880…
ONT.4663.2	AT1G69370;AT1G69380;AT1G69390;AT1G69400;AT1G69410;AT1G69420;AT1G69430;AT1G69440;AT1G69450;AT1G69460;AT1G69470;AT1G69480;AT1G69485;AT1G69490;AT1G69500;AT1G69510;AT1G69520;AT1G69523;AT1G69526;AT1G69530;AT1G69540;AT1G69550;AT1G69560;AT1G69570;AT1G69580;AT1G69600;AT1G69610;AT1G69620;AT1G69630;AT1G69640;AT1G69650;AT1G69660;AT1G69670;AT1G69680;AT1G69690;AT1G69700;AT1G69710;AT1G69720;AT1G69730;AT1G69740…
ONT.15135.2	AT5G05110;AT5G05113;AT5G05120;AT5G05130;AT5G05140;AT5G05150;AT5G05160;AT5G05170;AT5G05180;AT5G05190;AT5G05200;AT5G05210;AT5G05220;AT5G05230;AT5G05240;AT5G05250;AT5G05260;AT5G05270;AT5G05280;AT5G05290;AT5G05300;AT5G05310;AT5G05320;AT5G05330;AT5G05340;AT5G05350;AT5G05360;AT5G05365;AT5G05370;AT5G05380;AT5G05390;AT5G05400;AT5G05410;AT5G05420;AT5G05430;AT5G05440;AT5G05450;AT5G05460;AT5G05470;AT5G05480…
ONT.11291.2	AT3G46190;AT3G46200;AT3G46206;AT3G46210;AT3G46220;AT3G46230;AT3G46240;AT3G46260;AT3G46270;AT3G46280;AT3G46290;AT3G46300;AT3G46310;AT3G46320;AT3G46330;AT3G46340;AT3G46350;AT3G46360;AT3G46370;AT3G46380;AT3G46390;AT3G46400;AT3G46410;AT3G46420;AT3G46430;AT3G46440;AT3G46450;AT3G46460;AT3G46470;AT3G46480;AT3G46490;AT3G46500;AT3G46510;AT3G46520;AT3G46530;AT3G46540;AT3G46550;AT3G46560;AT3G46570;AT3G46580…
ONT.7457.30	AT2G32430;AT2G32440;AT2G32450;AT2G32460;AT2G32470;AT2G32480;AT2G32487;AT2G32500;AT2G32510;AT2G32520;AT2G32530;AT2G32540;AT2G32550;AT2G32560;AT2G32580;AT2G32590;AT2G32600;AT2G32610;AT2G32620;AT2G32630;AT2G32640;AT2G32645;AT2G32650;AT2G32660;AT2G32670;AT2G32680;AT2G32700;AT2G32710;AT2G32720;AT2G32730;AT2G32740;AT2G32750;AT2G32760;AT2G32765;AT2G32770;AT2G32780;AT2G32785;AT2G32788;AT2G32790;AT2G32800…
ONT.13646.6	AT4G06676;AT4G06688
ONT.6994.2	AT2G20490;AT2G20495;AT2G20500;AT2G20510;AT2G20515;AT2G20520;AT2G20530;AT2G20540;AT2G20550;AT2G20560;AT2G20562;AT2G20570;AT2G20580;AT2G20585;AT2G20590;AT2G20595;AT2G20597;AT2G20605;AT2G20610;AT2G20613;AT2G20616;AT2G20618;AT2G20619;AT2G20620;AT2G20625;AT2G20630;AT2G20635;AT2G20650;AT2G20660;AT2G20670;AT2G20680;AT2G20690;AT2G20700;AT2G20710;AT2G20720;AT2G20725;AT2G20740;AT2G20750;AT2G20760;AT2G20770…

## Sheet: UP between C vs D
#lncRNA_ID	Gene_ID
ONT.10261.1	AT3G06019,FAF4,NP3,AT3G06035,AT3G06040,PRXIIF,TSC10A,AT3G06070,TBL10,AT3G06090,NIP7;1,MKP2,MUTE,AT3G06130,LUL4,AT3G06142,AT3G06145,AT3G06150,AT3G06160,AT3G06170,AT3G06180,BPM2,AT3G06200,AT3G06210,AT3G06220,MKK8,AT3G06240,FRS7,GATL4,AT3G06270,AT3G06280,SAC3B,P4H2,AT3G06310,AT3G06320,AT3G06330,AT3G06340,MEE32,AGP27,NHX4,TLP9,AT3G06390,CHR11,AT3G06410,ATG8H,PPR2,AT3G06435,AT3G06440,AT3G06450,AT3G064…
ONT.11390.1	AT3G48550,CSR1,AT3G48570,XTH11,NF-YC1,AT3G48600,NPC6,AT3G48620,AT3G48630,AT3G48640,AT3G48660,IDN2,AT3G48675,GAMMA CAL2,CXE12,CXE13,AT3G48710,DCF,GSA2,SWEET11,CDC2,AT3G48760,AT3G48770,SPT1,AT3G48790,AT3G48800,AT3G48810,AT3G48820,AT3G48830,AT3G48840,PHT3;2,AT3G48860,HSP93-III,AT3G48880,MAPR3,AT3G48900,MYB45,EMB1080,AT3G48940,AT3G48950,AT3G48960,AT3G48970,AT3G48980,AAE3,AT3G49000,BBC1,AT3G49020,AT3G…
ONT.11862.1	AT3G60245,CKB3,AT3G60260,AT3G60270,UCC3,AT3G60286,AT3G60290,AT3G60300,AT3G60310,AT3G60318,AT3G60320,AT3G60328,HA7,AT3G60340,ARABIDILLO-2,EDA14,AT3G60370,AT3G60380,HAT3,SHOT1,AT3G60410,AT3G60420,AT3G60440,AT3G60450,DUO1,AT3G60470,AT3G60480,AT3G60490,CER7,AT3G60510,AT3G60520,GATA4,AT3G60540,CYCP3;2,AT3G60560,EXPB5,AT3G60580,AT3G60590,VAP27-1,CDS5,HAM2,ATG8G,AT3G60647,AT3G60650,AT3G60660,AT3G60670,A…
ONT.1197.3	AT1G24851,AT1G25025,AT1G25025,AT1G25180,AT1G31720,AT1G31730,BGAL15,AT1G31750,AT1G31760,ABCG14,AT1G31772,AT1G31780,AT1G31790,CYP97A3,AFH14,ACBP6,FRL2,NFD3,PUT1,PUT2,AT1G31835,AT1G31840,AT1G31850,AT-IE,AT1G31870,AT1G31875,BRX,AT1G31920,XLG3,AT1G31940,AT1G31950,AT1G31960,STRS1,AT1G31990,AT1G32000,AT1G32010,AT1G32020,AT1G32030,SCAMP5,PRK,NSI,LrgB,AT1G32090,PRR1,AT4G08740,AT4G20690,P5CR,AT5G45573,ONT.…
ONT.12360.2	CYP71A20,AT4G13320,AT4G13330,LRX3,MEE55,NIG,AT4G13360,AT4G13370,MEE56,EXT12,RTFL12,AT4G13400,ATCSLA15,HAK5,IIL1,AT4G13440,AT4G13450,SUVH9,MYB79,AT4G13490,AT4G13500,AMT1-1,SMAP1,AT4G13530,AT4G13540,AT4G13550,UNE15,HTA4,AT4G13572,AT4G13575,AT4G13580,AT4G13590,AT4G13600,MEE57,AT4G13615,AT4G13620,AT4G13630,UNE16,AT4G13650,ONT.12359,ONT.12361,ONT.13833
ONT.1312.1	RALFL5,RanBPM,AT1G35490,AT1G35500,AT1G35510,HOS10,AT1G35516,ARF15,FANCM,AT1G35537,ARF14,AT1G35550,AT1G35560,CINV1,AT1G35610,AT1G35614,AT1G35617,PDIL5-2,AT1G35625,AT1G35630,AT1G35660,CDPK2,RPL21C,AT1G35710,ANNAT1,PUM9,ONT.1311
ONT.1312.2	RALFL5,RanBPM,AT1G35490,AT1G35500,AT1G35510,HOS10,AT1G35516,ARF15,FANCM,AT1G35537,ARF14,AT1G35550,AT1G35560,CINV1,AT1G35610,AT1G35614,AT1G35617,PDIL5-2,AT1G35625,AT1G35630,AT1G35660,CDPK2,RPL21C,AT1G35710,ANNAT1,PUM9,ONT.1311
ONT.13610.1	CRK40,AT4G04580,AT4G04601,APR1,AT4G04614,ATG8B,AT4G04630,AT4G04632,ATPC1,AT4G04650,AT4G04670,AT4G04680,AT4G04690,CPK31,CPK27,CPK22,CPK21,AT4G04730,CPK23,AT4G04745,AT4G04750,AT4G04760,ABCI8,AT4G04775,MED21,AT4G04790,MSRB3,MSRB4,MSRB5,MSRB6,KEA3,DER2.2,CLS,AT4G04880,PCFS4,ONT.12156,ONT.12158,ONT.6930
ONT.13654.1	AT4G07940,AT4G07950,CSLC12,AT4G07965,AT4G07990,AT4G08025,AT4G08028,AT4G08039,ACS11
ONT.13737.1	AT4G10860,AT4G10870,AT4G10880,AT4G10890,AT4G10895,AT4G10910,KELP,AT4G10925,AT4G10930,AT4G10940,AT4G10950,AT4G10955,UGE5,AT4G10970,AT4G11000,NDPK3,AT4G11020,AT4G11030,AT4G11040,GH9C3,MTSSB,WRKY41,3xHMG-box1,TBL23,AT4G11100,SPA2,AT4G11120,RDR2,CRF1,TUF,AT4G11160,AT4G11170,AT4G11175,AT4G11180,AT4G11190,AT4G11210,AT4G11211,BTI2,AT4G11230,TOPP7,AGL52,SGT1B,AT4G11270,ACS6,AT4G11290,AT4G11300
ONT.13983.2	HB-2,AT4G16790,AT4G16800,AT4G16807,AT4G16810,PLA-I{beta]2,AT4G16830,AT4G16835,AT4G16840,VRN2,AT4G16850,AT4G16855,RPP4,AT4G16880,SNC1,AT4G16900,AT4G16915,AT4G16920,AT4G16930,AT4G16940,RPP5,AT4G16970,AT4G16980,RLM3,AT4G17000,AT4G17010,AT4G17020,EXLB1,CLPR4,UGLYAH,FIP2,AT4G17070,AT4G17080,AT4G17085,CT-BMY,AT4G17100,AT4G17140,AT4G17150,RABB1a,ONT.12509,ONT.12516,ONT.13984
ONT.14695.2	CHB3,PERK5,AT4G34450,AGB1,SK12,AT4G34480,CAP1,AT4G34500,KCS17,KCS18,CIB1,AT4G34540,AT4G34550,AT4G34555,AT4G34560,THY-2,COW1,AT4G34588,AT4G34600,BLH6,SSR16,AT4G34630,SQS1,SQS2,AT4G34660,AT4G34670,GATA3,AT4G34690,CIB22,AVA-P1,AT4G34730,ASE2,AT4G34750,AT4G34760,AT4G34770,AT4G34780,AT4G34790,AT4G34800,AT4G34810,MRL1,AT4G34840,LAP5,A/N-InvB,ROC5,AT4G34880,AT4G34881,XDH1,XDH2,AT4G34910,AT4G34920,AT4G34…
ONT.16626.3	WRKY27,AT5G52840,AT5G52850,ABCG8,MAKR5,AT5G52880,AT5G52882,AT5G52890,MAKR6,AT5G52901,ATIM,PKP-BETA1,AT5G52930,AT5G52940,AT5G52950,AT5G52960,AT5G52965,AT5G52970,AT5G52975,AT5G52980,AT5G52990,TAP46,AT5G53010,AT5G53020,AT5G53030,RKD4,AT5G53045,AT5G53050,RCF3,AT5G53070,AT5G53080,AT5G53090,AT5G53100,AT5G53110,SPDS3,CNGC1,AT5G53140,AT5G53144,AT5G53150,RCAR3,FTSH11,PTB2,SWEET3,TRY,AT5G53205,SPCH,AT5G532…
ONT.18093.4	HUA2,AT5G23160,AT5G23170,AT5G23180,CYP86B1,AT5G23200,SCPL34,AT5G23212,NIC3,NIC2,AT5G23240,AT5G23250,TT16,STP11,AT5G23280,PFD5,PYRD,FSD3,STE14A,AT5G23330,AT5G23340,AT5G23350,AT5G23360,AT5G23370,AT5G23380,AT5G23390,MIA40,AT5G23400,AT5G23405,AT5G23411,HMGB6,AT5G23430,FTRA1,LCBK1,AT5G23460,AT5G23470,AT5G23480,AT5G23490,AT5G23510,AT5G23520,CXE18,AT5G23535,AT5G23540,AT5G23550,SGS3,AT5G23575,CDPK9,AT5G2…
ONT.18152.2	AT5G24510,TTG1,DMR6,BGLU31,BGLU32,PP2-B12,AT5G24570,AT5G24580,TIP,AT5G24593,AT5G24600,AT5G24610,AT5G24620,BIN4,AT5G24640,AT5G24650,LSU4,LSU2,EMB2820,AT5G24680,AT5G24690,AT5G24710,AT5G24740,AT5G24750,AT5G24760,VSP2,VSP1,AT5G24790,BZIP9,AT5G24810,AT5G24820,AT5G24830,AT5G24840,CRY3,FPF1,AT5G24870,AT5G24879,AT5G24880,AT5G24890,CYP714A2
ONT.2770.1	AT1G04890,AT1G04900,AT1G04910,SPS3F,AT1G04930,Tic20-I,AT1G04945,TAFII59,AT1G04960,AT1G04970,PDIL2-2,AT1G04985,AT1G04990,PFA-DSP1,EFE,AT1G05020,AT1G05030,AT1G05040,GTF2H2,AT1G05060,CLE20,AT1G05070,AT1G05080,AT1G05085,AT1G05090,MAPKKK18,AT1G05120,AT1G05136,AT1G05140,AT1G05150,CYP88A3,AT1G05170,AXR1,emb2394,GLR3.4,AT1G05205,AT1G05210,AT1G05220,HDG2,AT1G05240,AT1G05250,RCI3,AT1G05270,AT1G05280,AT1G05…
ONT.8777.1	GATA17,AT3G16880,PPR40,AT3G16895,AT3G16900,AAE7,CTL2,AT3G16930,AT3G16940,LPD1,AT3G16960,AT3G16970,NRPB9A,AT3G16990,UBC32,REM22,AT3G17020,AT3G17030,HCF107,AT3G17060,AT3G17070,AT3G17080,AT3G17090,AT3G17100,AT3G17120,AT3G17130,AT3G17140,AT3G17150,AT3G17152,AT3G17155,AT3G17160,RFC3,scpl33,AT3G17190,UPL6,HS1,PMEI2,AT3G17225,AT3G17230,mtLPD2,AT3G17250,AT3G17261,AT3G17265,AT3G17270,AT3G17280,EMB2786,DRM…
ONT.8963.1	ZML1,ACA9,MSR1,PGR7,AT3G21210,AT3G21215,MKK5,4CL5,4CL2,ABCC8,GLTP3,DOF2,UBP7,AT3G21290,AT3G21295,AT3G21300,AT3G21310,AT3G21320,AT3G21330,AT3G21338,AT3G21340,MED6,AT3G21351,AT3G21352,AT3G21360,BGLU19,AT3G21371,AT3G21380,AT3G21390,AT3G21400,AT3G21410,LBO1,ALY3,AT3G21450,AT3G21460,AT3G21465,AT3G21470,AT3G21480,AT3G21490,DXPS1,AHP1,DMP1,AT3G21530,AT3G21540,DMP2,UGT84A2,AT3G21570,ABCI12,AT3G21590,AT3G…
ONT.9388.1	PHS2,PHT4;3,AT3G46990,AT3G47000,AT3G47010,AT3G47020,AT3G47030,AT3G47040,AT3G47050,ftsh7,AT3G47070,AT3G47080,AT3G47090,AT3G47100,AT3G47110,AT3G47120,AT3G47130,AT3G47140,AT3G47150,AT3G47160,AT3G47170,AT3G47180,AT3G47190,AT3G47200,AT3G47210,PLC9,AT3G47250,PLC8,AT3G47295,SELT,ASN1,AT3G47341,HSD2,HSD3,AT3G47370,AT3G47380,PHS1,AT3G47400,AT3G47410,G3Pp1,PEX11B,TIP5;1,NOA1,ATSMC2,LHCA4,AT3G47480,ONT.1132…
ONT.9606.2	AT3G52270,GTE6,IQD3,ATPQ,AT3G52302,AT3G52310,AT3G52320,AT3G52330,SPP2,AT3G52350,AT3G52360,FLA15,CP33,AT3G52390,SYP122,OEP7,PAD4,AT3G52440,PUB22,AT3G52460,AT3G52470,AT3G52480,AT3G52490,AT3G52500,AT3G52510,AT3G52520,OFP6,OFP18,AT3G52550,UEV1D-4,AT3G52561,AT3G52570,AT3G52580,UBQ1,CWINV2,AT3G52610,AT3G52620,AT3G52630,AT3G52640,AT3G52660,AT3G52670,AT3G52680,AT3G52690,AT3G52700,AT3G52710,ACA1,AT3G52730…

## Sheet: Down between C vs D
#lncRNA_ID	Gene_ID
ONT.11183.1	AT1G33860,AT3G30160,BR6OX2,AT3G30200,MYB121,AT3G30220,AT3G30222,AT3G30230,AT3G30235,AT3G30247,AGL79,AT3G30280,CYP702A8,AT3G30300,AT3G30320,UMAMIT32,AT5G55508
ONT.15003.1	AT5G02230,AT5G02240,EMB2730,EXPA9,ABCI20,AT5G02280,NAK,PRT6,MYB3R-5,AT5G02330,AT5G02340,AT5G02350,AT5G02360,AT5G02370,MT2B,DAU1,PLL2,ALG10,AT5G02420,AT5G02430,AT5G02440,AT5G02450,AT5G02460,DPA,AT5G02480,Hsp70-2,HSC70-1,AT5G02502,AT5G02510,AT5G02520,AT5G02530,AT5G02540,AT5G02550,HTA12,AT5G02570,AT5G02580,AT5G02590,NAKR1,AT5G02610,ANK1,Cand6,AT5G02640,AT5G02650,AT5G02660,AT5G02670,AT5G02680,AT5G026…
ONT.15963.1	CDC20.5,AGL89,LACS7,AT5G27606,ALY1,CYCH;1,ACBP5,TIF3B1,AT5G27650,DEG14,HTA7,RECQSIM,AT5G27690,AT5G27700,AT5G27710,emb1644,AT5G27730,EMB2775,AT5G27750,AT5G27760,AT5G27770,SAUR75,AT5G27790,AT5G27800,AT5G27810,AT5G27820,AT5G27830,TOPP8,AT5G27850,AT5G27860,AT5G27870,AT5G27880,AT5G27889,AT5G27890,ONT.15958
ONT.16307.1	TUB4,AT5G44345,AT5G44350,AT5G44360,PHT4;6,AT5G44380,AT5G44390,AT5G44400,AT5G44410,PDF1.2,PDF1.2c,AT5G44440,AT5G44450,CML43,AT5G44470,DUR,AT5G44490,AT5G44495,AT5G44500,TAO1,AT5G44520,AT5G44530,AT5G44540,AT5G44550,VPS2.2,AT5G44565,AT5G44568,AT5G44570,AT5G44572,AT5G44574,AT5G44575,AT5G44578,AT5G44580,AT5G44582,AT5G44585,AT5G44590,AT5G44600,MAP18,CYP706A3,AT5G44630,MCM6,BGLU13,CEST,AT5G44660,GALS2,AT…
ONT.17450.2	EIF4B1,AT4G08395,AT5G06360,AT5G06370,AT5G06380,FLA17,AT5G06400,AT5G06410,AT5G06420,AT5G06430,AT5G06440,AT5G06450,UBA 2,AT5G06470,AT5G06480,AT5G06490,AGL96,NF-YA10,AT5G06520,ABCG22,AT5G06540,AT5G06550,AT5G06560,AT5G06570,AT5G06580,AT5G06590,UBP12,AT5G06610,SDG38,AT5G06630,GIS2,AT5G06660,AT5G06670,SPC98,WCRKC1,AT5G06700,HAT14,PA2,AT5G06730,AT5G06740,AT5G06750,AT5G06755,LEA4-5,AT5G06770,EML2,AT5G067…
ONT.18840.1	EMB3142,OLEO3,AT5G51220,EMF2,AT5G51250,AT5G51260,AT5G51270,AT5G51280,ACD5,AT5G51300,AT5G51310,SWI1,AT5G51340,MOL1,AT5G51360,AT5G51370,AT5G51380,AT5G51390,AT5G51400,AT5G51410,AT5G51420,EYE,AT5G51440,RIN3,RGF5,ATTPPA,AT5G51470,SKS2,AT5G51490,AT5G51500,AT5G51510,AT5G51520,AT5G51530,AT5G51540,LPA2,EXL3,AT5G51560,AT5G51570,AT5G51580,AT5G51590,PLE,AT5G51610,AT5G51620,AT5G51630,YLS7,AT5G51650,CPSF160,AT…
ONT.18984.2	emb2731,AT5G55950,AT5G55960,AT5G55970,AT5G55980,CBL2,Hsp81.4,HSP81-3,AT5G56020,HSP81-2,AT5G56040,AT5G56050,AT5G56060,AT5G56070,AT5G56075,NAS2,COX15,AT5G56100,MYB80,AT5G56120,TEX1,AT5G56140,UBC30,AT5G56160,LLG1,ARP8,AT5G56190,AT5G56200,WIP2,AT5G56220,PRA1.G2,AT5G56240,HAP8,AT5G56260,WRKY2,CSN6A,PEX5,GAMT2,AT5G56310,EXPA14,AT5G56325,ACA8,ATCRT1,AT5G56350,PSL4,AT5G56368,AT5G56369,AT5G56370,AT5G56380…
ONT.19449.1	AT5G65580,AT5G65610,AT5G66950,AT5G66960,AT5G66970,AT5G66980,AT5G66985,RKD3,AT5G67000,AT5G67010,AT5G67020,ABA1,AT5G67040,AT5G67050,HEC1,RALFL34,MAPKKK19,AT5G67090,ICU2,ALC,AT5G67120,AT5G67130,AT5G67140,AT5G67150,EPS1,AT5G67170,TOE3,DEAR2,AT5G67200,IRX15-L,AT5G67220,IRX14-L,SDN3,SKIP2,CYCD3;2,AT5G67265,EB1C,RLK,AT5G67290,MYBR1,CYP81G1,HOS15,NRAMP4,AT5G67340,AT5G67350,ARA12,CGLD27,CKA1,AT5G67385,AT5…
ONT.2000.2	AT1G66245,AT1G66250,AT1G66260,BGLU21,BGLU22,AT1G66290,AT1G66300,AT1G66310,AT1G66320,AT1G66330,ETR1,AT1G66345,RGL1,AT1G66360,MYB113,MYB114,MYB90,CML23,CAM4,AT1G66420,AT1G66430,AT1G66440,AT1G66450,RHD6,AT1G66475,AT1G66480,AT1G66490,AT1G66500,AT1G66510,pde194,AT1G66530,AT1G66540,WRKY67,AT1G66553,WRKY64,SUC7,SAG24,COX19-1,ABO3,AT1G66610,AT1G66620,AT1G66630,AT1G66640,AT1G66650,AT1G66660,CLPP3,AR401,AT…
ONT.2000.4	AT1G66245,AT1G66250,AT1G66260,BGLU21,BGLU22,AT1G66290,AT1G66300,AT1G66310,AT1G66320,AT1G66330,ETR1,AT1G66345,RGL1,AT1G66360,MYB113,MYB114,MYB90,CML23,CAM4,AT1G66420,AT1G66430,AT1G66440,AT1G66450,AT1G66460,RHD6,AT1G66475,AT1G66480,AT1G66490,AT1G66500,AT1G66510,pde194,AT1G66530,AT1G66540,WRKY67,AT1G66553,WRKY64,SUC7,SAG24,COX19-1,ABO3,AT1G66610,AT1G66620,AT1G66630,AT1G66640,AT1G66650,AT1G66660,CLPP…
ONT.2000.5	AT1G66245,AT1G66250,AT1G66260,BGLU21,BGLU22,AT1G66290,AT1G66300,AT1G66310,AT1G66320,AT1G66330,ETR1,AT1G66345,RGL1,AT1G66360,MYB113,MYB114,MYB90,CML23,CAM4,AT1G66420,AT1G66430,AT1G66440,AT1G66450,AT1G66460,RHD6,AT1G66475,AT1G66480,AT1G66490,AT1G66500,AT1G66510,pde194,AT1G66530,AT1G66540,WRKY67,AT1G66553,WRKY64,SUC7,SAG24,COX19-1,ABO3,AT1G66610,AT1G66620,AT1G66630,AT1G66640,AT1G66650,AT1G66660,CLPP…
ONT.3886.1	AT1G36510,AT1G36580,AT1G36622,AT1G36640,AT1G36675,AT1G36730,AT1G36745,AT1G36756
ONT.4076.1	AT1G51538,AT1G51540,AT1G51550,AT1G51560,AT1G51570,AT1G51580,MNS1,ZML2,AT1G51610,AT1G51620,MSR2,ATEXO70G2,AT1G51650,MKK4,AT1G51670,4CL1,B ALPHA,DOF1,UBP6,AT1G51720,AT1G51730,SYP81,AT1G51745,IAR3,AT1G51770,ILL5,IOS1,AT1G51805,AT1G51810,AT1G51820,AT1G51823,AT1G51830,AT1G51840,AT1G51850,AT1G51860,AT1G51870,RHS6,AT1G51890,AT1G51900,AT1G51910,AT1G51913,AT1G51915,AT1G51920,AT1G51930,LYK3,IAA18,IQD27,ONT…
ONT.4146.2	ABCG24,AT1G53400,AT1G53420,AT1G53430,AT1G53440,AT1G53450,AT1G53460,MSL4,MRD1,HEI10,MUM4,MPK18,FAP3,AT1G53530,AT1G53540,AT1G53541,AT1G53542,AT1G53543,AT1G53550,AT1G53560,MAP3KA,GLY3,NTMC2T6.1,AT1G53600,AT1G53610,AT1G53620,AT1G53633,AT1G53635,AT1G53640,AT1G53645,CID8,AT1G53660,MSRB1,GSTU28,AT1G53690,WAG1,AT1G53705,RTFL9,AT1G53710,CYP59,SRF6,RPT1A,AT1G53760,AT1G53770,AT1G53780,AT1G53785,AT1G53790,AT…
ONT.4293.3	ZF14,ZW18,AAP1,RXF12,XW6,AT1G58390,AT1G58400,AT1G58410,AT1G58420,RXF26,XF1,TPR6,AT1G58460,RBP1,AT1G58525,AT1G58602,AT1G58643,AT1G58684,AT1G58725,AT1G58766,AT1G58807,AT1G58848,AT1G58936,AT1G58983,AT1G59030,AT1G59077,AT1G58807,AT1G59171,AT1G59218,AT1G58643,AT1G58684
ONT.4293.6	ZF14,ZW18,AAP1,RXF12,XW6,AT1G58390,AT1G58400,AT1G58410,AT1G58420,RXF26,XF1,TPR6,AT1G58460,RBP1,AT1G58525,AT1G58602,AT1G58643,AT1G58684,AT1G58725,AT1G58766,AT1G58807,AT1G58848,AT1G58936,AT1G58983,AT1G59030,AT1G59077,AT1G58807,AT1G59171,AT1G59218,AT1G58643,AT1G58684
ONT.4956.1	AT1G01073,AT1G76820,AT1G76830,AT1G76840,SEC5A,LSM3B,AT1G76870,AT1G76880,GT2,TLP1,AT1G76910,AT1G76920,EXT4,AT1G76940,PRAF1,IDL5,AT1G76954,AT1G76955,AT1G76960,AT1G76965,AT1G76970,AT1G76980,AT1G76994,SKP2B,AT1G77010,AT1G77020,AT1G77030,AT1G77060,MAF1,AT1G77090,AT1G77093,AT1G77100,PIN6,ADH1,AT1G77122,PGSIP2,VPS45,AT1G77145,AT1G77150,AT1G77160,AT1G77170,SKIP,AT1G77200,STP14,AT1G77220,AT1G77230,AAE2,AT…
ONT.6764.2	GRP9,AT2G05500,AT2G05510,GRP-3,AT2G05530,AT2G05540,AT2G05580,AT2G05590,AT2G05600,PGR5,ATG8D,AT2G05635,AT2G05642,AT2G05645,ACO3,AT2G05720,AT2G05752,AT2G05753,AT2G05755,AT2G05760,ONT.6765
ONT.7165.1	AT2G25100,SDF2,AT2G25120,AT2G25130,CLPB4,AT2G25150,CYP82F1,AT2G25169,PKL,RR12,AT2G25185,AT2G25190,AT2G25200,AT2G25210,AT2G25220,MYB100,CCP3,AT2G25250,AT2G25260,AT2G25270,AT2G25280,Phox1,LCR81,AT2G25300,AT2G25305,AT2G25310,AT2G25312,AT2G25320,AT2G25330,VAMP712,LCR14,AT2G25350,AT2G25355,AT2G25360,AT2G25370,AT2G25409,AT2G25410,AT2G25420,AT2G25430,RLP20,AT2G25450,AT2G25460,RLP21,AT2G25480,AT2G25482,E…
ONT.7800.1	AtCaN2,AT2G40420,AT2G40430,AT2G40435,AT2G40440,AT2G40450,AT2G40460,LBD15,ASG8,AT2G40480,HEME2,AT2G40500,AT2G40510,AT2G40520,AT2G40530,KT2,ETG1,AT2G40560,AT2G40570,AT2G40580,AT2G40590,AT2G40600,EXPA8,AT2G40620,AT2G40630,AT2G40640,AT2G40650,AT2G40660,RR16,GLY1,AT2G40700,AT2G40710,AT2G40711,AT2G40720,CTEXP,WRKY55,AT2G40745,WRKY54,AT2G40760,AT2G40765,AT2G40770,AT2G40780,CXXS2,AT2G40800,AT2G40802,ATG1…
ONT.7823.2	AT2G40960,MYBC1,AT2G40980,AT2G40990,AT2G40995,AT2G41000,CAMBP25,AT2G41020,AT2G41040,AT2G41050,AT2G41060,EEL,AT2G41080,AT2G41082,AT2G41090,TCH3,CAM2,AT2G41120,AT2G41130,CRK1,AT2G41150,AT2G41160,AT2G41170,SIB2,AT2G41190,AT2G41200,PIP5K5,GLU2,AT2G41225,AT2G41231,AT2G41233,BHLH100,AT2G41250,M17,M10,SSL2,SSL1,RR3,AT2G41330,RPB5D,AT2G41342,AUG1,AT2G41360,BOP2,AT2G41380,AT2G41390,AT2G41400,AT2G41410,AT2…
ONT.8217.1	AT3G03305,LCAT3,AT3G03320,AT3G03330,UNE6,AT3G03341,AT3G03350,AT3G03360,AT3G03370,DEG7,AT3G03400,AT3G03405,AT3G03410,AT3G03420,AT3G03430,AT3G03440,RGL2,AT3G03456,AT3G03460,CYP89A9,CHAT,PEX19-1,AT3G03500,AT3G03510,NPC3,NPC4,NPC5,AT3G03550,AT3G03560,AT3G03570,AT3G03580,AT3G03590,RPS2,AT3G03610,AT3G03620,AT3G03626,CS26,BGLU25,EDA5,WOX11,AT3G03670,AT3G03680,UNE7,AT3G03700,RIF10,CAT4,AT3G03726,AT3G0373…
ONT.8706.1	AT3G15350,AT3G15351,COX17,MT3,SPA3,UBC25,AT3G15356,AT3G15357,AT3G15358,AT3G15359,TRX-M4,EXPA12,AT3G15380,SDE5,AT3G15395,ATA20,AT3G15410,AT3G15420,AT3G15430,AT3G15440,AT3G15450,AT3G15460,AT3G15470,AT3G15480,AT3G15490,NAC3,NAC2,AT3G15518,AT3G15520,AT3G15530,AT3G15534,IAA19,AT3G15548,AT3G15550,AT3G15570,AT3G15578,APG8H,AT3G15590,AT3G15604,AT3G15605,AT3G15610,UVR3,AT3G15630,AT3G15640,AT3G15650,GRX4,A…

## Sheet: Target gene with ATG gene
Table S8.LncRNAs with autophagy genes as target genes
#lncRNA_ID	Name of target gene	Expression level
ONT.14695.2	Sh3p2	up
ONT.7800.1	Atg18C	down
ONT.10261.1	Atg8H	up
ONT.13610.1	Atg8B	up
ONT.11862.1	Atg8G	up
ONT.6764.2	Atg8D	down
