# Supplementary material for: Full-length transcriptome sequencing of Arabidopsis plants provided new insights into the autophagic regulation of photosynthesis
Source: Sci Rep. 2024 Jun 25;14:14588. doi: 10.1038/s41598-024-65555-7 (PMC11199623; doi:10.1038/s41598-024-65555-7)
Supplement: Supplementary file 9 — Supplementary Table S8. [file 41598_2024_65555_MOESM9_ESM.xlsx]

## Sheet: Sheet1
Table S8 Primer List.
qACT2-F	GGTAACATTGTGCTCAGTGGTGG
qACT2-R	AACGACCTTAATCTTCATGCTGC
qPSAF-F	CCTCCACACCTCAATCCATGAA
qPSAF-R	TCTCGATCTGAGCATTGAGAGC
qPSAD-1F	CACCGGTGGTCTTCTACGTAAA
qPSAD-1R	GGATCTAAGCCTTGTCCCCAAA
qPSAH-2F	CTTGGAGGAGGCTCTTTGCTTA
qPSAH-2R	TGGCTCTTGAGGACCTCTCTTA
qPSAD-2F	CCCAAACACACCATCACCAATC
qPSAD-2R	CGGTCCTTCTCTCATTATCGCA
qPSAE-1F	TGCATTGGATGAGGTCGAAGAA
qPSAE-1R	GGCTCGAGATTCAGATGAGGAG
qPSBO2-F	ACTCTTCACAAGCTAGGCTCAC
qPSBO2-R	TACCGGTACCCTTTACCTCCAT
qPSB27-F	GTACGCTTTCGATGCAGAAGAC
qPSB27-R	AATGGAGAAGAAGGCCTGACTG
qPPL1-F	TGCTCCTTGGATCTCATTGCTT
qPPL1-R	TGTCAGAGACAGCAAGGAATCC
qPSBO1-F	GGCTCTGAGACTTTCTCGTTCA
qPSBO1-R	GTGTTCTGGAACTCTGGAGGAG
qCYTC6A-F	TTTGTTCCTCCCAACAGGTCAA
qCYTC6A-R	AAGTCTGCCCAAGAGATTCTGG
